# Supplementary material for: Transcriptome profiling combined with network analysis deepens the understanding of immune response mechanisms in blood of pacific oyster Crassostrea gigas infected by Vibrio alginolyticus
Source: Frontiers journal article supplement (doi:10.3389/fmars.2022.1017445), 2022-09-16
Supplement: Data_Sheet_1.XLSX [file Data_Sheet_1.XLSX]

## Sheet: 12h
gene_id	V_12h_2N_1	V_12h_2N_2	V_12h_2N_3	P_12h_2N_1	P_12h_2N_2	P_12h_2N_3	V_12h_2N	P_12h_2N	gene_description	log2FoldChange	pvalue	padj	expression trend
novel.2035	263.341	557.133	191.435	0	4.79249	0	337.303	1.5975	- && - && -	7.77169	5.59975e-18	1.04855e-13	up
Cg09730	793.597	1489.73	1564.63	89.9427	100.642	139.379	1282.65	109.988	- && sp|O61715|INX19_CAEEL Innexin-19 OS=Caenorhabditis elegans OX=6239 GN=inx-19 PE=1 SV=2 && PF00876:Innexin	3.54272	9.61062e-16	8.99794e-12	up
Cg13420	58371.1	59251.7	132578	9773.78	8012.09	7913.46	83400.1	8566.44	- && sp|P81491|SAA5_MESAU Serum amyloid A-5 protein OS=Mesocricetus auratus OX=10036 PE=1 SV=1 && PF00277:Serum amyloid A protein	3.28328	7.00598e-14	4.3729e-10	up
Cg12973	157.29	130.432	118.711	2.90138	2.8755	5.73914	135.478	3.83867	- && sp|Q9BDB7|IF44L_MOUSE Interferon-induced protein 44-like OS=Mus musculus OX=10090 GN=Ifi44l PE=2 SV=2 && PF07534:TLD	5.12134	1.02502e-13	4.79838e-10	up
Cg15903	1376.28	340.056	880.172	30.948	71.8874	51.6523	865.504	51.4959	- && - && PF00531:Death domain	4.07046	3.67546e-13	1.37646e-09	up
novel.6842	0	0	0	305.612	60.3854	190.212	0	185.403	- && - && -	-9.89463	4.77875e-13	1.49137e-09	down
Cg15338	0	0	0	194.392	84.3479	119.702	0	132.814	- && - && PF16026:Mitochondria-eating protein	-9.41318	2.42103e-12	6.47625e-09	down
novel.4140	8.34111	3.72664	0	424.568	83.3894	151.677	4.02258	219.878	- && - && -	-5.7976	8.12051e-12	1.82458e-08	down
Cg27997	3517.57	3383.79	2896.12	477.76	215.662	536.2	3265.82	409.874	- && sp|Q3T0D6|LEG4_BOVIN Galectin-4 OS=Bos taurus OX=9913 GN=LGALS4 PE=2 SV=1 && PF00337:Galactoside-binding lectin	2.99384	8.76968e-12	1.82458e-08	up
Cg11548	14.299	6.52162	2.13893	441.977	85.3064	195.951	7.6532	241.078	- && - && -	-4.99356	3.58754e-11	6.71766e-08	down
Cg00985	3964.41	2814.55	5105.64	338.494	634.526	677.219	3961.53	550.08	- && sp|Q5EB39|KLH40_XENTR Kelch-like protein 40 OS=Xenopus tropicalis OX=8364 GN=klhl40 PE=2 SV=1 && PF01344:Kelch motif|PF07707:BTB And C-terminal Kelch|PF00651:BTB/POZ domain	2.84808	6.15821e-11	1.0483e-07	up
Cg16451	16212.7	5429.72	13780.1	470.991	1700.38	905.145	11807.5	1025.5	- && sp|O54750|CP2J6_MOUSE Cytochrome P450 2J6 OS=Mus musculus OX=10090 GN=Cyp2j6 PE=2 SV=2 && PF00067:Cytochrome P450	3.5253	9.99091e-11	1.559e-07	up
novel.344	0	0	0	197.294	31.6305	101.665	0	110.196	- && - && -	-9.14389	1.19796e-10	1.72552e-07	down
Cg04588	36.9392	23.2915	28.8756	345.264	541.552	163.156	29.7021	349.99	- && sp|Q54BU4|ABCB1_DICDI ABC transporter B family member 1 OS=Dictyostelium discoideum OX=44689 GN=abcB1 PE=3 SV=1 && PF00005:ABC transporter|PF00664:ABC transporter transmembrane region	-3.56222	1.55955e-10	2.0859e-07	down
Cg13596	2774.02	1588.48	1685.48	279.5	315.346	407.479	2015.99	334.108	- && sp|Q20929|DMSR1_CAEEL G-protein coupled receptor dmsr-1 OS=Caenorhabditis elegans OX=6239 GN=dmsr-1 PE=1 SV=1 && PF10324:Serpentine type 7TM GPCR chemoreceptor Srw	2.59258	3.38642e-10	4.22738e-07	up
novel.2740	7.14952	1.86332	0	278.532	44.0909	150.857	3.00428	157.827	- && - && -	-5.76024	4.56485e-10	5.3423e-07	down
Cg16945	10917.3	5042.15	30000.7	640.238	1405.16	1638.93	15320.1	1228.11	- && sp|P0C0W8|GP139_RAT Probable G-protein coupled receptor 139 OS=Rattus norvegicus OX=10116 GN=Gpr139 PE=2 SV=1 && PF00001:7 transmembrane receptor (rhodopsin family)	3.64082	1.05918e-09	1.16666e-06	up
Cg09342	0	0	0	169.247	23.9625	67.2299	0	86.8132	- && - && -	-8.79955	1.51969e-09	1.48124e-06	down
Cg25321	290.747	174.221	459.871	25.1453	42.1739	13.118	308.28	26.8124	- && sp|P42664|UVS2_XENLA Embryonic protein UVS.2 OS=Xenopus laevis OX=8355 PE=2 SV=2 && PF00431:CUB domain|PF00008:EGF-like domain|PF01400:Astacin (Peptidase family M12A)	3.52779	1.55401e-09	1.48124e-06	up
Cg06020	1576.47	2541.57	4370.91	334.626	197.451	502.585	2829.65	344.887	- && sp|D3YXG0|HMCN1_MOUSE Hemicentin-1 OS=Mus musculus OX=10090 GN=Hmcn1 PE=1 SV=1 && PF00090:Thrombospondin type 1 domain|PF00092:von Willebrand factor type A domain|PF00057:Low-density lipoprotein receptor domain class A|PF00530:Scavenger receptor cysteine-rich domain	3.03598	1.5821e-09	1.48124e-06	up
Cg19758	1308.36	1353.7	2904.67	206.965	290.425	343.529	1855.58	280.306	- && - && PF11669:WW domain-binding protein 1	2.72642	3.15832e-09	2.81617e-06	up
Cg23794	4719.88	7063.85	3699.29	548.361	1215.38	598.51	5161.01	787.416	- && sp|P55114|NAS33_CAEEL Zinc metalloproteinase nas-33 OS=Caenorhabditis elegans OX=6239 GN=nas-33 PE=2 SV=2 && PF01400:Astacin (Peptidase family M12A)|PF01549:ShK domain-like	2.71261	3.6455e-09	3.10282e-06	up
novel.7165	0	0	0	74.4687	71.8874	37.7144	0	61.3568	- && - && -	-8.29834	5.33721e-09	4.34518e-06	down
novel.1396	200.187	107.141	65.2375	1470.03	629.734	917.443	124.188	1005.74	- && - && -	-3.01942	6.91583e-09	5.39579e-06	down
novel.4991	113.201	122.979	161.49	4.83563	18.2115	8.19877	132.557	10.4153	- && - && -	3.67339	1.36247e-08	1.00567e-05	up
Cg03677	866.284	184.469	936.853	16.4411	74.7629	5.73914	662.535	32.3144	- && - && PF06083:Interleukin-17	4.36125	1.39639e-08	1.00567e-05	up
Cg04533	1926.8	2431.63	3758.11	482.596	676.7	515.703	2705.51	558.333	- && sp|Q86YT5|S13A5_HUMAN Solute carrier family 13 member 5 OS=Homo sapiens OX=9606 GN=SLC13A5 PE=1 SV=1 && PF00939:Sodium:sulfate symporter transmembrane region	2.2768	3.87441e-08	2.68697e-05	up
Cg20789	813.854	299.995	926.159	91.877	125.563	63.1306	680.003	93.5236	- && sp|Q5XJ85|MYD88_DANRE Myeloid differentiation primary response protein MyD88 OS=Danio rerio OX=7955 GN=myd88 PE=2 SV=2 && PF13676:TIR domain	2.86292	4.35292e-08	2.91101e-05	up
Cg11549	5.95794	13.0432	0	319.152	60.3854	129.541	6.33373	169.693	- && - && -	-4.72453	4.71976e-08	3.0475e-05	down
novel.1935	0	0	0	115.088	23.004	26.2361	0	54.776	- && P27502.1 RecName: Full=Polyprotein P3; AltName: Full=P194 protein; Contains: RecName: Full=Putative movement protein; Short=MP; Contains: RecName: Full=Capsid protein; AltName: Full=Coat protein; Short=CP; Contains: RecName: Full=Protease; Short=PR; Contains: RecName: Full=Reverse transcriptase/Ribonuclease H; Short=RT; AltName: Full=p55; Flags: Precursor && -	-8.13452	8.60842e-08	5.37309e-05	down
Cg19523	1476.38	1604.32	2374.22	475.826	277.006	427.156	1818.3	393.329	- && sp|Q49B93|SC5AC_MOUSE Sodium-coupled monocarboxylate transporter 2 OS=Mus musculus OX=10090 GN=Slc5a12 PE=1 SV=1 && PF00474:Sodium:solute symporter family	2.2087	1.07149e-07	6.47214e-05	up
Cg00064	643.457	702.472	740.071	108.318	107.352	204.149	695.334	139.94	- && - && -	2.31134	1.16333e-07	6.8073e-05	up
Cg27450	0	0.931661	0	70.6002	92.0159	32.7951	0.310554	65.1371	- && sp|P44718|Y454_HAEIN Uncharacterized metal-dependent hydrolase HI_0454 OS=Haemophilus influenzae (strain ATCC 51907 / DSM 11121 / KW20 / Rd) OX=71421 GN=HI_0454 PE=3 SV=1 && PF01026:TatD related DNase	-7.42261	1.63748e-07	9.02877e-05	down
Cg18942	0	0	0	37.7179	81.4724	20.4969	0	46.5624	- && - && -	-7.90001	1.6394e-07	9.02877e-05	down
novel.6797	65.5373	40.0614	59.8902	418.766	234.832	282.038	55.163	311.879	- && - && -	-2.50209	2.06747e-07	0.00011061	down
Cg11872	115.584	27.9498	7.48627	0	0	0	50.34	0	- && - && PF00656:Caspase domain|PF00035:Double-stranded RNA binding motif	8.22583	2.84271e-07	0.00014786	up
Cg12351	545.747	133.227	475.913	54.1591	22.0455	58.2113	384.962	44.8053	- && - && -	3.10073	3.25675e-07	0.000164818	up
Cg09987	2447.52	2035.68	3372.03	544.492	599.062	792.002	2618.41	645.185	- && sp|Q95KZ0|PE2R4_PANTR Prostaglandin E2 receptor EP4 subtype OS=Pan troglodytes OX=9598 GN=PTGER4 PE=2 SV=1 && PF00001:7 transmembrane receptor (rhodopsin family)	2.02065	3.57937e-07	0.000176378	up
novel.7456	3.57476	28.8815	59.8902	1044.5	88.1819	513.243	30.7821	548.641	- && - && -	-4.15262	4.33195e-07	0.000207989	down
Cg14169	0	0	0	83.1729	20.1285	23.7764	0	42.3593	- && - && PF09772:Transmembrane protein 26	-7.76365	5.13467e-07	0.000240367	down
Cg19670	6079.48	3786.27	1019.2	466.155	633.568	476.349	3628.32	525.357	- && sp|A3RLT6|RSSA_PINFU 40S ribosomal protein SA OS=Pinctada fucata OX=50426 PE=2 SV=1 && PF16122:40S ribosomal protein SA C-terminus|PF00318:Ribosomal protein S2	2.78793	5.50675e-07	0.000251497	up
Cg15071	0	0	0	111.22	2.8755	50.8324	0	54.9758	- && - && PF04488:Glycosyltransferase sugar-binding region containing DXD motif	-8.14066	5.97593e-07	0.000266427	down
Cg25378	81.0279	275.772	147.586	28.0467	15.336	12.2982	168.129	18.5603	- && - && -	3.18511	6.19312e-07	0.000268704	up
novel.6491	65.5373	199.375	155.073	1007.75	1310.27	436.175	139.995	918.063	- && - && PF00643:B-box zinc finger	-2.71108	6.314e-07	0.000268704	down
Cg20347	613.667	82.9178	385.008	25.1453	44.0909	46.733	360.531	38.6564	- && - && PF00386:C1q domain	3.21922	7.99603e-07	0.000332724	up
novel.498	150.14	134.159	324.049	3.86851	37.3814	8.19877	202.783	16.4829	- && - && -	3.62517	1.15918e-06	0.00047117	up
Cg23014	2967.05	2858.33	8434.89	911.033	805.139	1033.05	4753.43	916.406	- && sp|A8E627|ENDUD_XENLA Poly(U)-specific endoribonuclease-D OS=Xenopus laevis OX=8355 GN=endou-d PE=2 SV=1 && PF09412:Endoribonuclease XendoU|PF01033:Somatomedin B domain	2.37485	1.18264e-06	0.00047117	up
Cg20482	2300.96	2288.16	1726.12	344.297	600.979	648.523	2105.08	531.266	- && sp|Q9ER72|SYCC_MOUSE Cysteine--tRNA ligase, cytoplasmic OS=Mus musculus OX=10090 GN=Cars1 PE=1 SV=2 && PF01406:tRNA synthetases class I (C) catalytic domain	1.98612	1.31289e-06	0.000512164	up
Cg22711	169.205	76.3962	264.158	19.3425	17.253	29.5156	169.92	22.037	- && sp|Q9UGM3|DMBT1_HUMAN Deleted in malignant brain tumors 1 protein OS=Homo sapiens OX=9606 GN=DMBT1 PE=1 SV=2 && PF00530:Scavenger receptor cysteine-rich domain|PF00135:Carboxylesterase family	2.94238	1.7016e-06	0.000650253	up
Cg27427	90.5606	126.706	65.2375	353.968	896.196	344.348	94.168	531.504	- && sp|Q9Y345|SC6A5_HUMAN Sodium- and chloride-dependent glycine transporter 2 OS=Homo sapiens OX=9606 GN=SLC6A5 PE=1 SV=3 && PF00209:Sodium:neurotransmitter symporter family	-2.49525	2.09737e-06	0.000785466	down
Cg26514	1394.16	1196.25	2443.73	321.086	513.755	193.491	1678.05	342.777	- && sp|P18539|AMPC_SERMA Beta-lactamase OS=Serratia marcescens OX=615 GN=ampC PE=3 SV=1 && PF00144:Beta-lactamase	2.2919	2.36855e-06	0.00086963	up
Cg16097	71.4952	15.8382	13.9031	943.915	69.0119	353.367	33.7455	455.431	- && - && -	-3.76066	2.6373e-06	0.000949682	down
Cg24341	645.84	1155.26	919.742	184.721	169.654	298.435	906.947	217.604	- && - && PF00229:TNF(Tumour Necrosis Factor) family	2.05877	2.78662e-06	0.00098452	up
Cg22732	0	10.2483	2.13893	19.3425	232.915	89.3666	4.12907	113.875	- && - && PF04505:Interferon-induced transmembrane protein	-4.74283	2.92827e-06	0.000992001	down
Cg06221	175.163	106.209	603.18	26.1124	50.8004	11.4783	294.851	29.4637	- && - && -	3.32643	2.95226e-06	0.000992001	up
Cg24956	1696.82	2322.63	751.836	80.2715	433.241	128.721	1590.43	214.078	- && sp|Q92484|ASM3A_HUMAN Acid sphingomyelinase-like phosphodiesterase 3a OS=Homo sapiens OX=9606 GN=SMPDL3A PE=1 SV=2 && -	2.89367	2.96673e-06	0.000992001	up
Cg13123	797.172	1015.51	1343.25	346.231	256.878	230.386	1051.98	277.831	- && - && -	1.92128	3.21245e-06	0.00105532	up
Cg06648	1963.74	970.79	2456.57	464.221	405.445	436.175	1797.03	435.28	- && sp|Q99L04|DHRS1_MOUSE Dehydrogenase/reductase SDR family member 1 OS=Mus musculus OX=10090 GN=Dhrs1 PE=1 SV=1 && PF00106:short chain dehydrogenase	2.04546	3.4858e-06	0.00110888	up
Cg22746	0	9.31661	14.9725	140.233	106.393	80.348	8.09638	108.992	- && - && -	-3.7349	3.49394e-06	0.00110888	down
Cg13012	88.1775	3.72664	68.4459	0	0.958499	0	53.45	0.3195	- && - && -	7.35069	3.60877e-06	0.00112624	up
Cg30432	1.19159	0	6.4168	33.8494	192.658	25.4162	2.53613	83.9746	- && - && PF04199:Putative cyclase	-5.06327	3.97746e-06	0.00122095	down
Cg04075	82.2195	174.221	416.023	16.4411	38.3399	28.6957	224.154	27.8256	- && - && -	3.00992	4.09564e-06	0.00123206	up
novel.7174	0	0	0	55.1262	10.5435	31.9752	0	32.5483	- && - && -	-7.38449	4.14526e-06	0.00123206	down
Cg15339	0	3.72664	0	62.8632	49.8419	38.5342	1.24221	50.4131	- && - && PF16026:Mitochondria-eating protein	-5.23576	4.57856e-06	0.00133494	down
novel.6828	388.457	32.6081	54.5428	6.76988	17.253	4.91926	158.536	9.64738	- && - && -	4.04231	4.67446e-06	0.00133494	up
Cg17704	191.846	12.1116	53.4734	0	0	5.73914	85.8102	1.91305	- && - && PF01391:Collagen triple helix repeat (20 copies)	5.42946	4.72657e-06	0.00133494	up
novel.3153	3.57476	17.7016	3.2084	164.411	63.2609	81.9877	8.16157	103.22	- && - && -	-3.63443	4.77654e-06	0.00133494	down
Cg17449	1031.91	2095.3	509.066	285.302	211.828	195.951	1212.1	231.027	- && sp|P45842|RL34_AEDAL 60S ribosomal protein L34 OS=Aedes albopictus OX=7160 GN=RpL34 PE=2 SV=2 && PF01199:Ribosomal protein L34e	2.39185	5.07067e-06	0.0013963	up
Cg19085	2870.53	2945.91	4841.48	1054.17	1075.44	985.493	3552.64	1038.37	- && sp|P27446|FYN_XIPHE Tyrosine-protein kinase Fyn OS=Xiphophorus helleri OX=8084 GN=fyn PE=2 SV=3 && PF00017:SH2 domain|PF00018:SH3 domain|PF07714:Protein tyrosine and serine/threonine kinase	1.77461	5.2159e-06	0.00141547	up
Cg22667	1568.13	1007.13	1414.91	149.905	228.123	469.79	1330.05	282.606	- && sp|Q09660|CC44_CAEEL Probable cytochrome P450 CYP44 OS=Caenorhabditis elegans OX=6239 GN=cyp-44A1 PE=3 SV=2 && PF00067:Cytochrome P450	2.23357	5.29543e-06	0.00141653	up
novel.65	412.289	360.553	931.506	94.7784	33.5475	141.019	568.116	89.7816	- && - && -	2.65995	5.45118e-06	0.00143018	up
Cg20919	20.257	10.2483	0	306.579	65.1779	109.044	10.1684	160.267	- && - && -	-3.98726	5.55674e-06	0.00143018	down
Cg11731	518.34	742.533	898.353	10183.8	910.574	5059.46	719.742	5384.63	- && - && PF00386:C1q domain	-2.9032	5.57559e-06	0.00143018	down
Cg20873	2171.07	1299.67	2128.24	605.421	314.388	527.181	1866.33	482.33	- && sp|Q9P959|AOX_EMENI Alternative oxidase, mitochondrial OS=Emericella nidulans (strain FGSC A4 / ATCC 38163 / CBS 112.46 / NRRL 194 / M139) OX=227321 GN=alxA PE=3 SV=2 && PF01786:Alternative oxidase	1.95191	5.77973e-06	0.00146251	up
Cg00306	1583.62	1637.86	1582.81	88.0085	46.9664	464.051	1601.43	199.675	- && - && -	3.00221	6.01813e-06	0.00150253	up
Cg27296	3.57476	17.7016	0	141.2	135.148	68.0498	7.0921	114.8	- && sp|Q9UA35|S28A3_EPTST Solute carrier family 28 member 3 OS=Eptatretus stoutii OX=7765 GN=SLC28A3 PE=2 SV=1 && PF07662:Na+ dependent nucleoside transporter C-terminus|PF01773:Na+ dependent nucleoside transporter N-terminus	-3.98802	6.24486e-06	0.00153862	down
Cg28080	131.075	158.382	89.8353	813.353	353.686	519.802	126.431	562.28	- && sp|A1L2F3|NUSAP_DANRE Nucleolar and spindle-associated protein 1 OS=Danio rerio OX=7955 GN=nusap1 PE=2 SV=2 && PF16006:Nucleolar and spindle-associated protein	-2.15217	6.36703e-06	0.00154834	down
Cg13124	1338.15	2177.29	1632.01	377.179	638.36	345.168	1715.82	453.569	- && - && -	1.91989	6.76816e-06	0.00161093	up
Cg23880	39.3224	49.378	34.223	363.639	135.148	182.013	40.9744	226.934	- && sp|Q9I8C7|ACH10_CHICK Neuronal acetylcholine receptor subunit alpha-10 OS=Gallus gallus OX=9031 GN=CHRNA10 PE=3 SV=1 && PF02931:Neurotransmitter-gated ion-channel ligand binding domain	-2.46741	6.80728e-06	0.00161093	down
novel.7284	17.8738	9.31661	26.7367	303.678	124.605	59.0312	17.9757	162.438	- && - && -	-3.17956	6.88246e-06	0.00161093	down
Cg27652	169.205	155.587	22.4588	14.5069	5.75099	9.01865	115.751	9.75885	- && - && -	3.56954	7.02363e-06	0.00162367	up
Cg10404	337.219	223.599	1168.93	88.9756	87.2234	95.9256	576.582	90.7082	- && - && -	2.66794	7.24106e-06	0.00164318	up
Cg08672	189.462	408.067	286.617	75.4359	34.506	65.5902	294.716	58.5107	- && - && PF00001:7 transmembrane receptor (rhodopsin family)	2.3328	7.28352e-06	0.00164318	up
Cg07509	381.308	193.785	679.112	51.2577	72.8459	103.305	418.068	75.8027	- && sp|P41146|OPRX_HUMAN Nociceptin receptor OS=Homo sapiens OX=9606 GN=OPRL1 PE=1 SV=1 && PF00001:7 transmembrane receptor (rhodopsin family)	2.46156	7.61455e-06	0.00168636	up
Cg07681	1.19159	0	0	51.2577	33.5475	29.5156	0.397196	38.1069	- && - && -	-6.64959	7.65505e-06	0.00168636	down
Cg25473	1054.55	542.226	1007.44	130.562	149.526	298.435	868.073	192.841	- && - && PF12736:Cell-cycle sustaining, positive selection,	2.169	7.83115e-06	0.0017051	up
Cg17332	1105.79	391.297	549.706	127.661	171.571	155.777	682.266	151.67	- && - && -	2.16874	8.34526e-06	0.00179615	up
Cg12671	94.1354	126.706	187.157	26.1124	22.0455	25.4162	135.999	24.5247	- && - && PF01683:EB module	2.47139	8.84871e-06	0.00188287	up
Cg26494	229.976	259.933	248.116	42.5536	59.4269	74.6088	246.009	58.8631	- && sp|Q99698|LYST_HUMAN Lysosomal-trafficking regulator OS=Homo sapiens OX=9606 GN=LYST PE=1 SV=3 && PF14844:PH domain associated with Beige/BEACH|PF02138:Beige/BEACH domain	2.06148	9.49809e-06	0.00199833	up
Cg09840	930.63	489.122	810.656	190.524	238.666	166.435	743.469	198.542	- && - && -	1.90484	9.89322e-06	0.00205834	up
Cg21007	89.369	12.1116	41.7092	0.967126	0	2.45963	47.73	1.14225	- && - && -	5.33526	1.0255e-05	0.00211016	up
novel.1957	7.14952	39.1297	73.7932	0.967126	0	0	40.0242	0.322375	- && - && -	6.93708	1.11429e-05	0.00226794	up
Cg04306	986.634	789.117	1157.16	246.617	369.981	223.007	977.638	279.868	- && sp|Q555L8|Y4695_DICDI SH3 and F-BAR domain-containing protein DDB_G0274695 OS=Dictyostelium discoideum OX=44689 GN=DDB_G0274695 PE=4 SV=1 && PF00611:Fes/CIP4, and EFC/F-BAR homology domain	1.80482	1.19381e-05	0.00240367	up
Cg26310	169.205	38.1981	4.27787	0.967126	3.83399	0	70.5605	1.60037	- && - && -	5.49064	1.28495e-05	0.00253809	up
Cg13353	3573.57	853.401	4575.18	226.308	810.89	139.379	3000.72	392.192	- && - && PF00020:TNFR/NGFR cysteine-rich region	2.93593	1.28768e-05	0.00253809	up
Cg04049	56.0046	120.184	45.9871	7.73701	10.5435	4.91926	74.0586	7.73325	- && - && -	3.26865	1.30583e-05	0.00254705	up
Cg10762	97.7102	27.9498	601.041	8.70414	16.2945	28.6957	242.234	17.8981	- && - && -	3.75411	1.3954e-05	0.00269369	up
Cg04988	183.504	33.5398	947.548	38.6851	29.7135	32.7951	388.197	33.7312	- && - && -	3.52461	1.49942e-05	0.00286497	up
Cg22062	1547.87	1016.44	1350.74	394.588	243.459	468.15	1305.02	368.732	- && sp|Q9WVM6|TLL2_MOUSE Tolloid-like protein 2 OS=Mus musculus OX=10090 GN=Tll2 PE=1 SV=1 && PF00431:CUB domain|PF00051:Kringle domain	1.8229	1.56736e-05	0.00296452	up
Cg19334	694.695	729.49	836.323	181.82	192.658	295.156	753.503	223.211	- && sp|Q9V576|WUN_DROME Putative phosphatidate phosphatase OS=Drosophila melanogaster OX=7227 GN=wun PE=1 SV=2 && PF01569:PAP2 superfamily	1.7544	1.63787e-05	0.00306691	up
Cg08451	556.471	470.489	788.197	190.524	172.53	166.435	605.052	176.496	- && sp|Q3UVX5|GRM5_MOUSE Metabotropic glutamate receptor 5 OS=Mus musculus OX=10090 GN=Grm5 PE=1 SV=2 && PF01094:Receptor family ligand binding region|PF00003:7 transmembrane sweet-taste receptor of 3 GCPR|PF07562:Nine Cysteines Domain of family 3 GPCR	1.77747	1.65469e-05	0.00306773	up
Cg25716	168.014	212.419	180.74	36.7508	57.5099	30.3355	187.057	41.5321	- && sp|Q8HYR6|DHRS9_BOVIN Dehydrogenase/reductase SDR family member 9 OS=Bos taurus OX=9913 GN=DHRS9 PE=2 SV=1 && PF00106:short chain dehydrogenase	2.17385	1.70049e-05	0.00309969	up
Cg22319	7.14952	4.6583	0	71.5673	58.4684	47.5529	3.93594	59.1962	- && - && -	-3.92188	1.70504e-05	0.00309969	down
Cg07180	2196.1	2842.5	3163.48	491.3	551.137	1132.25	2734.03	724.896	- && sp|Q9UH65|SWP70_HUMAN Switch-associated protein 70 OS=Homo sapiens OX=9606 GN=SWAP70 PE=1 SV=1 && PF00169:PH domain	1.91484	1.73459e-05	0.0031231	up
Cg19954	544.555	513.345	562.54	102.515	210.87	121.342	540.147	144.909	- && sp|Q4QRK0|MAP11_DANRE Methionine aminopeptidase 1 OS=Danio rerio OX=7955 GN=metap1 PE=2 SV=2 && PF00557:Metallopeptidase family M24|PF15801:zf-MYND-like zinc finger, mRNA-binding	1.89862	1.76642e-05	0.00315012	up
Cg24009	692.312	128.569	189.296	40.6193	52.7174	60.6709	336.726	51.3359	- && - && PF11710:G protein-coupled glucose receptor regulating Gpa2	2.71158	1.8048e-05	0.00316874	up
Cg05153	5004.67	7097.39	4466.1	622.829	1127.19	2126.76	5522.72	1292.26	- && sp|P22758|TGM1_RABIT Protein-glutamine gamma-glutamyltransferase K OS=Oryctolagus cuniculus OX=9986 GN=TGM1 PE=2 SV=2 && PF00868:Transglutaminase family|PF01841:Transglutaminase-like superfamily	2.0953	1.82103e-05	0.00316874	up
Cg19759	4068.08	3871.98	5153.76	1592.86	1225.92	1584	4364.61	1467.59	- && - && -	1.57236	1.82763e-05	0.00316874	up
Cg22648	2.38317	6.52162	0	92.8441	45.0494	34.4348	2.96827	57.4428	- && sp|P32314|FOXN2_HUMAN Forkhead box protein N2 OS=Homo sapiens OX=9606 GN=FOXN2 PE=1 SV=3 && PF00250:Forkhead domain	-4.23862	1.94788e-05	0.00334625	down
Cg27975	448.037	236.642	340.091	95.7455	77.6384	94.2859	341.59	89.2233	- && - && PF13621:Cupin-like domain	1.93574	2.05422e-05	0.00346029	up
Cg24392	384.883	411.794	449.176	29.9809	50.8004	145.938	415.284	75.5732	- && - && -	2.4547	2.06724e-05	0.00346029	up
Cg09542	1165.37	1431.03	2286.52	374.278	547.303	485.367	1627.64	468.983	- && sp|P41436|IAP_GVCPM Apoptosis inhibitor IAP OS=Cydia pomonella granulosis virus (isolate Mexico/1963) OX=654905 GN=IAP PE=4 SV=1 && PF00653:Inhibitor of Apoptosis domain	1.79516	2.0697e-05	0.00346029	up
Cg16165	146.565	117.389	62.0291	0.967126	21.087	7.3789	108.661	9.811	- && sp|P24733|MYS_ARGIR Myosin heavy chain, striated muscle OS=Argopecten irradians OX=31199 PE=1 SV=1 && -	3.47151	2.17437e-05	0.0035734	up
novel.3112	3.57476	12.1116	1.06947	115.088	35.4645	77.8883	5.58527	76.1469	- && - && -	-3.74204	2.17553e-05	0.0035734	down
Cg09393	0	0	0	14.5069	28.755	29.5156	0	24.2591	- && sp|Q5UPX0|YR290_MIMIV Putative ATP-dependent RNA helicase R290 OS=Acanthamoeba polyphaga mimivirus OX=212035 GN=MIMI_R290 PE=3 SV=1 && PF00270:DEAD/DEAH box helicase|PF00271:Helicase conserved C-terminal domain	-6.96127	2.20373e-05	0.00358824	down
Cg27552	4.76635	0.931661	0	66.7317	30.672	39.3541	1.89934	45.5859	- && - && -	-4.64249	2.292e-05	0.0036998	down
Cg14547	50.0467	110.868	131.544	13.5398	14.3775	16.3975	97.4863	14.7716	- && - && PF00169:PH domain|PF00779:BTK motif|PF00017:SH2 domain|PF14604:Variant SH3 domain	2.72216	2.4538e-05	0.00389709	up
Cg23017	570.77	304.653	271.645	24.1782	32.589	122.982	382.356	59.9162	- && sp|B0JZG0|S23A2_XENTR Solute carrier family 23 member 2 OS=Xenopus tropicalis OX=8364 GN=slc23a2 PE=2 SV=1 && PF00860:Permease family	2.6694	2.46144e-05	0.00389709	up
Cg14830	16010.2	7775.64	15850.6	2298.86	5065.67	2950.74	13212.1	3438.42	- && sp|Q13887|KLF5_HUMAN Krueppel-like factor 5 OS=Homo sapiens OX=9606 GN=KLF5 PE=1 SV=2 && -	1.94204	2.47665e-05	0.00389709	up
Cg24796	1949.44	2670.14	1131.5	512.577	300.01	651.802	1917.02	488.13	- && - && PF04923:Ninjurin	1.97333	2.73046e-05	0.00425642	up
Cg23860	30.9813	22.3599	26.7367	167.313	90.0989	144.298	26.6926	133.903	- && sp|A7RLE5|DNPH1_NEMVE Putative 2'-deoxynucleoside 5'-phosphate N-hydrolase 1 OS=Nematostella vectensis OX=45351 GN=v1g160099 PE=3 SV=1 && PF05014:Nucleoside 2-deoxyribosyltransferase	-2.33001	2.75048e-05	0.00425642	down
Cg19583	3434.15	2628.21	2369.94	1028.06	335.475	792.821	2810.77	718.784	- && sp|Q9UBL3|ASH2L_HUMAN Set1/Ash2 histone methyltransferase complex subunit ASH2 OS=Homo sapiens OX=9606 GN=ASH2L PE=1 SV=1 && -	1.96725	2.92035e-05	0.00447426	up
Cg09493	53.6214	41.9247	24.5977	2.90138	0	2.45963	40.048	1.787	- && sp|Q20191|NAS13_CAEEL Zinc metalloproteinase nas-13 OS=Caenorhabditis elegans OX=6239 GN=nas-13 PE=2 SV=5 && PF00051:Kringle domain|PF01400:Astacin (Peptidase family M12A)|PF00059:Lectin C-type domain	4.47332	2.93903e-05	0.00447426	up
Cg11334	320.537	277.635	119.78	842.367	885.653	992.871	239.317	906.964	- && sp|P27012|SCRY4_ENTDO S-crystallin 4 OS=Enteroctopus dofleini OX=267067 PE=2 SV=1 && PF02798:Glutathione S-transferase, N-terminal domain|PF14497:Glutathione S-transferase, C-terminal domain	-1.92242	2.97406e-05	0.00449108	down
novel.7462	738.784	295.336	293.034	2455.53	1433.91	1533.99	442.385	1807.81	- && - && PF00965:Tissue inhibitor of metalloproteinase	-2.03164	3.0408e-05	0.00455512	down
Cg29200	1024.77	2336.6	2622.33	6201.21	9121.07	6564.76	1994.57	7295.68	- && - && -	-1.87082	3.10489e-05	0.00461421	down
novel.4454	0	2.79498	0	98.6469	10.5435	34.4348	0.931661	47.8751	- && - && -	-5.57882	3.22485e-05	0.00470974	down
novel.3837	270.49	390.366	32.084	4306.61	398.735	1826.69	230.98	2177.35	- && - && -	-3.23636	3.2384e-05	0.00470974	down
Cg03793	13.1075	44.7197	47.0566	358.804	102.559	204.969	34.9612	222.111	- && sp|P18910|ANPRA_RAT Atrial natriuretic peptide receptor 1 OS=Rattus norvegicus OX=10116 GN=Npr1 PE=1 SV=1 && PF00211:Adenylate and Guanylate cyclase catalytic domain|PF01094:Receptor family ligand binding region|PF07714:Protein tyrosine and serine/threonine kinase|PF07701:Heme NO binding associated	-2.66227	3.24463e-05	0.00470974	down
Cg09986	71.4952	334.466	3.2084	1.93425	8.62649	9.01865	136.39	6.52646	- && - && -	4.38152	3.38125e-05	0.00487029	up
Cg28268	15.4906	16.7699	36.3619	108.318	132.273	130.36	22.8741	123.65	- && sp|Q7ZYC4|ACBG2_XENLA Long-chain-fatty-acid--CoA ligase ACSBG2 OS=Xenopus laevis OX=8355 GN=acsbg2 PE=2 SV=1 && PF00501:AMP-binding enzyme	-2.43454	3.6859e-05	0.00526859	down
novel.35	246.659	6.52162	197.851	8.70414	16.2945	9.01865	150.344	11.3391	- && - && -	3.72947	3.85448e-05	0.00546781	up
Cg25900	1699.2	255.275	844.879	54.1591	255.919	36.0746	933.119	115.384	- && - && -	3.01631	3.90951e-05	0.00550418	up
Cg19723	4.76635	0	2.13893	42.5536	53.6759	34.4348	2.30176	43.5548	- && - && -	-4.29993	3.99434e-05	0.00558164	down
Cg14027	47.6635	21.4282	32.084	281.434	94.8914	169.715	33.7252	182.013	- && - && -	-2.43737	4.19144e-05	0.00581368	down
Cg01100	308.621	117.389	909.047	91.877	36.423	72.1492	445.019	66.8164	- && - && -	2.7352	4.22648e-05	0.00581917	up
Cg05190	2577.4	3029.76	1377.47	264.025	595.228	824.797	2328.21	561.35	- && sp|O75131|CPNE3_HUMAN Copine-3 OS=Homo sapiens OX=9606 GN=CPNE3 PE=1 SV=1 && PF00168:C2 domain|PF07002:Copine	2.05196	4.55163e-05	0.00622112	up
Cg24212	11.9159	0	12.8336	161.51	54.6344	80.348	8.24983	98.8308	- && sp|Q9ET66|PI16_MOUSE Peptidase inhibitor 16 OS=Mus musculus OX=10090 GN=Pi16 PE=1 SV=2 && PF00188:Cysteine-rich secretory protein family	-3.6007	4.65982e-05	0.00632283	down
Cg25099	8752.21	7931.23	6907.69	1458.43	1660.12	3596.8	7863.71	2238.45	- && - && PF15998:Domain of unknown function (DUF4773)	1.81257	4.70319e-05	0.00633578	up
Cg12847	3678.43	2028.23	5364.45	731.147	1357.23	886.287	3690.37	991.556	- && - && PF12796:Ankyrin repeats (3 copies)	1.89598	4.76917e-05	0.00637597	up
Cg20676	854.368	473.284	1117.59	172.148	295.218	186.932	815.082	218.099	- && - && -	1.90197	4.83264e-05	0.00637597	up
Cg11472	0	0	0	51.2577	7.66799	14.7578	0	24.5612	- && - && -	-6.97731	4.84217e-05	0.00637597	down
novel.3967	60.771	2.79498	68.4459	0	1.917	0.819877	44.0039	0.912292	- && - && -	5.59159	4.86923e-05	0.00637597	up
Cg15183	203.761	281.361	296.242	50.2906	61.3439	92.6461	260.455	68.0935	- && sp|Q7JK24|B3GT1_GORGO Beta-1,3-galactosyltransferase 1 OS=Gorilla gorilla gorilla OX=9595 GN=B3GALT1 PE=3 SV=1 && PF01762:Galactosyltransferase	1.9337	5.25068e-05	0.0068277	up
novel.5266	0	0	0	54.1591	4.79249	17.2174	0	25.3897	- && - && -	-7.02542	5.28983e-05	0.00683117	down
Cg10010	1725.42	1083.52	2465.12	317.217	587.56	564.895	1758.02	489.891	- && sp|Q4R8W3|TNAP3_MACFA Tumor necrosis factor alpha-induced protein 3 OS=Macaca fascicularis OX=9541 GN=TNFAIP3 PE=2 SV=1 && PF02338:OTU-like cysteine protease	1.84317	5.42774e-05	0.00694626	up
Cg28563	1209.46	134.159	571.096	63.8303	144.733	98.3853	638.239	102.316	- && sp|Q9YHV4|FSTA_DANRE Follistatin-A OS=Danio rerio OX=7955 GN=fsta PE=2 SV=2 && PF07648:Kazal-type serine protease inhibitor domain	2.64055	5.48991e-05	0.00694626	up
Cg07105	120.35	66.1479	202.129	2.90138	17.253	27.056	129.543	15.7368	- && sp|P19357|GLUT4_RAT Solute carrier family 2, facilitated glucose transporter member 4 OS=Rattus norvegicus OX=10116 GN=Slc2a4 PE=1 SV=1 && PF00083:Sugar (and other) transporter	3.03311	5.49024e-05	0.00694626	up
Cg08312	148.948	383.844	516.553	73.5016	89.1404	76.2486	349.782	79.6302	- && sp|Q9VCZ3|OCTB1_DROME Octopamine receptor beta-1R OS=Drosophila melanogaster OX=7227 GN=Octbeta1R PE=2 SV=1 && PF00001:7 transmembrane receptor (rhodopsin family)	2.1358	5.63996e-05	0.0070878	up
Cg04473	36.9392	32.6081	62.0291	793.044	25.8795	398.46	43.8588	405.794	- && - && -	-3.21017	5.70296e-05	0.00711919	down
novel.5684	252.617	282.293	282.339	99.614	58.4684	73.789	272.416	77.2905	- && - && -	1.81798	5.74167e-05	0.00712005	up
Cg22897	1081.96	1336.93	1911.14	282.401	464.872	545.218	1443.34	430.83	- && - && -	1.74395	5.94919e-05	0.00732886	up
Cg29596	145.374	47.5147	81.2795	824.959	166.779	510.784	91.3893	500.84	- && sp|P12645|BMP3_HUMAN Bone morphogenetic protein 3 OS=Homo sapiens OX=9606 GN=BMP3 PE=1 SV=2 && PF00019:Transforming growth factor beta like domain	-2.45688	6.30115e-05	0.00771171	down
Cg20396	10.7243	8.38495	31.0146	126.694	327.807	28.6957	16.7079	161.065	- && - && -	-3.2698	6.3736e-05	0.00774789	down
Cg06506	11.9159	0.931661	1.06947	57.0605	76.6799	51.6523	4.639	61.7975	- && sp|P26221|GUN4_THEFU Endoglucanase E-4 OS=Thermobifida fusca OX=2021 GN=celD PE=1 SV=2 && PF00759:Glycosyl hydrolase family 9	-3.77817	6.43403e-05	0.00774789	down
Cg20814	1967.31	1236.31	2824.46	535.788	677.659	637.045	2009.36	616.83	- && - && -	1.70366	6.45487e-05	0.00774789	up
Cg23817	13.1075	13.9749	8.55574	108.318	60.3854	63.1306	11.8794	77.278	- && - && -	-2.69958	6.49623e-05	0.00774789	down
Cg20953	8723.61	5972.88	9068.01	442.944	3131.42	625.566	7921.5	1399.98	- && sp|Q2PZL6|FAT4_MOUSE Protocadherin Fat 4 OS=Mus musculus OX=10090 GN=Fat4 PE=1 SV=2 && -	2.50044	6.56463e-05	0.00777991	up
Cg20600	2174.65	2538.78	3866.12	684.725	880.86	1154.39	2859.85	906.658	- && - && -	1.65716	6.73108e-05	0.00791149	up
Cg01534	0	3.72664	1.06947	11.6055	18.2115	124.621	1.5987	51.4794	- && - && -	-4.95016	6.76015e-05	0.00791149	down
Cg14436	72.6868	23.2915	97.3215	8.70414	6.70949	5.73914	64.4333	7.05092	- && - && PF17517:IgGFc binding protein	3.19371	6.89716e-05	0.0080217	up
Cg13070	0	3.72664	1.06947	23.211	69.0119	27.8758	1.5987	40.0329	- && sp|P09479|ACHA_CHICK Acetylcholine receptor subunit alpha OS=Gallus gallus OX=9031 GN=CHRNA1 PE=1 SV=1 && PF02931:Neurotransmitter-gated ion-channel ligand binding domain|PF02932:Neurotransmitter-gated ion-channel transmembrane region	-4.57701	7.1628e-05	0.00827922	down
Cg21954	458.761	223.599	1017.06	49.3234	144.733	128.721	566.474	107.592	- && sp|Q0VC65|ETV6_BOVIN Transcription factor ETV6 OS=Bos taurus OX=9913 GN=ETV6 PE=2 SV=1 && PF02198:Sterile alpha motif (SAM)/Pointed domain|PF00178:Ets-domain	2.3957	7.27245e-05	0.00832482	up
Cg29288	107.243	112.731	180.74	15.474	37.3814	27.8758	133.571	26.9104	- && sp|O14522|PTPRT_HUMAN Receptor-type tyrosine-protein phosphatase T OS=Homo sapiens OX=9606 GN=PTPRT PE=1 SV=6 && PF00102:Protein-tyrosine phosphatase	2.31081	7.32199e-05	0.00832482	up
novel.3205	5.95794	0	0	57.0605	45.0494	33.615	1.98598	45.2416	- && - && -	-4.58894	7.33562e-05	0.00832482	down
Cg03269	339.602	130.432	68.4459	38.6851	26.838	7.3789	179.494	24.3006	- && sp|P86733|KCP_HALAI BPTI/Kunitz domain-containing protein (Fragment) OS=Haliotis asinina OX=109174 PE=1 SV=1 && PF00095:WAP-type (Whey Acidic Protein) 'four-disulfide core'	2.88888	7.52527e-05	0.0084886	up
Cg22712	116.776	68.0112	387.147	31.9152	15.336	37.7144	190.645	28.3218	- && sp|Q8BK48|EST2E_MOUSE Pyrethroid hydrolase Ces2e OS=Mus musculus OX=10090 GN=Ces2e PE=1 SV=1 && PF00135:Carboxylesterase family	2.74847	7.84896e-05	0.00880071	up
Cg09731	402.757	496.575	222.449	140.233	37.3814	51.6523	373.927	76.4223	- && sp|Q23157|INX11_CAEEL Innexin-11 OS=Caenorhabditis elegans OX=6239 GN=inx-11 PE=3 SV=1 && PF00876:Innexin	2.29221	8.03195e-05	0.00893969	up
novel.1907	2.38317	0	1.06947	43.5207	36.423	20.4969	1.15088	33.4802	- && - && -	-4.93698	8.0684e-05	0.00893969	down
Cg12942	17.8738	97.8244	28.8756	0	0	4.91926	48.1913	1.63975	- && sp|Q8BV66|IFI44_MOUSE Interferon-induced protein 44 OS=Mus musculus OX=10090 GN=Ifi44 PE=2 SV=1 && PF01926:50S ribosome-binding GTPase|PF07534:TLD	4.81964	8.15376e-05	0.00898113	up
novel.5225	0	0	0	29.9809	5.75099	29.5156	0	21.7492	- && - && -	-6.80387	8.85535e-05	0.00969687	down
novel.5287	0	0	0	60.929	0.958499	20.4969	0	27.4615	- && - && -	-7.13889	9.14451e-05	0.00995528	down
Cg03296	5.95794	1.86332	2.13893	194.392	0	83.6275	3.32006	92.6733	- && - && PF00386:C1q domain	-4.82115	9.20257e-05	0.00996059	down
Cg18815	345.56	599.989	1259.83	97.6798	142.816	247.603	735.127	162.7	- && sp|O14522|PTPRT_HUMAN Receptor-type tyrosine-protein phosphatase T OS=Homo sapiens OX=9606 GN=PTPRT PE=1 SV=6 && PF00102:Protein-tyrosine phosphatase	2.1749	9.38527e-05	0.0101	up
novel.6198	401.565	437.88	112.294	48.3563	92.9744	18.0373	317.246	53.1227	- && - && -	2.58085	9.88484e-05	0.0105768	up
Cg03804	2535.7	3242.18	3903.56	715.673	441.868	1455.28	3227.14	870.941	- && sp|P47736|RPGP1_HUMAN Rap1 GTPase-activating protein 1 OS=Homo sapiens OX=9606 GN=RAP1GAP PE=1 SV=2 && PF02145:Rap/ran-GAP	1.88933	0.000101766	0.0108271	up
Cg22117	26.2149	21.4282	33.1535	120.891	120.771	108.224	26.9322	116.628	- && sp|Q61602|GLI3_MOUSE Transcriptional activator GLI3 OS=Mus musculus OX=10090 GN=Gli3 PE=1 SV=2 && -	-2.11629	0.000103905	0.0109922	down
novel.5841	3.57476	0.931661	2.13893	68.666	13.419	38.5342	2.21512	40.2064	- && - && -	-4.2138	0.00010457	0.0110004	down
Cg20664	0	0	0	31.9152	7.66799	22.1367	0	20.5733	- && - && PF17517:IgGFc binding protein	-6.72293	0.000105546	0.0110249	down
Cg03610	1151.07	204.965	306.937	68.666	144.733	93.466	554.325	102.288	- && sp|P55088|AQP4_MOUSE Aquaporin-4 OS=Mus musculus OX=10090 GN=Aqp4 PE=1 SV=2 && PF00230:Major intrinsic protein	2.43756	0.000106451	0.0110249	up
Cg21715	999.742	17.7016	374.314	77.3701	28.755	29.5156	463.919	45.2135	- && sp|Q66IC8|DYLT5_DANRE Dynein light chain Tctex-type 5 OS=Danio rerio OX=7955 GN=dynlt5 PE=2 SV=1 && PF03645:Tctex-1 family	3.35956	0.00010657	0.0110249	up
Cg19332	263.341	148.134	96.2521	16.4411	50.8004	29.5156	169.242	32.2524	- && sp|Q804S2|BMP2_TETNG Bone morphogenetic protein 2 OS=Tetraodon nigroviridis OX=99883 GN=bmp2 PE=3 SV=2 && PF00019:Transforming growth factor beta like domain|PF00688:TGF-beta propeptide	2.3911	0.000111291	0.0114502	up
novel.4670	2.38317	75.4645	40.6398	0	1.917	0	39.4958	0.638999	- && - && -	5.99581	0.000113192	0.0115817	up
Cg06098	152.523	251.548	220.31	1074.48	498.419	579.653	208.127	717.517	- && sp|Q5I0P2|GCSH_RAT Glycine cleavage system H protein, mitochondrial OS=Rattus norvegicus OX=10116 GN=Gcsh PE=2 SV=1 && PF01597:Glycine cleavage H-protein	-1.7845	0.000113807	0.0115817	down
Cg03814	2180.6	1699.35	1383.89	324.954	676.7	645.243	1754.61	548.966	- && - && -	1.67612	0.000116505	0.0117922	up
novel.3411	69.1121	676.386	94.1131	43.5207	19.17	44.2734	279.87	35.6547	- && - && PF00643:B-box zinc finger	2.9728	0.000118894	0.0119693	up
Cg16163	25.0233	40.0614	28.8756	0	2.8755	0	31.3201	0.958499	- && sp|P24733|MYS_ARGIR Myosin heavy chain, striated muscle OS=Argopecten irradians OX=31199 PE=1 SV=1 && PF00063:Myosin head (motor domain)	5.07221	0.00012246	0.0121848	up
novel.927	32.1729	24.2232	55.6123	497.103	37.3814	270.56	37.3361	268.348	- && - && -	-2.84644	0.000122718	0.0121848	down
Cg07280	0	5.58996	2.13893	103.483	7.66799	53.292	2.5763	54.8142	- && - && PF00147:Fibrinogen beta and gamma chains, C-terminal globular domain	-4.36589	0.000122986	0.0121848	down
Cg22774	259.766	222.667	253.464	62.8632	94.8914	59.851	245.299	72.5352	- && sp|O35015|YNGK_BACSU Glycosyl hydrolase YngK OS=Bacillus subtilis (strain 168) OX=224308 GN=yngK PE=3 SV=1 && PF02638:Glycosyl hydrolase-like 10	1.75851	0.000124076	0.012228	up
Cg22010	15.4906	16.7699	29.9451	126.694	78.5969	104.944	20.7352	103.412	- && sp|Q28J59|F221A_XENTR Protein FAM221A OS=Xenopus tropicalis OX=8364 GN=fam221a PE=2 SV=1 && PF14753:Protein FAM221A/B	-2.31798	0.000126498	0.0124014	down
Cg20072	629.158	514.277	1064.12	190.524	37.3814	223.007	735.852	150.304	- && - && -	2.29067	0.000131401	0.012815	up
Cg07691	2.38317	0	0	54.1591	19.17	24.5963	0.794392	32.6418	- && - && PF00653:Inhibitor of Apoptosis domain	-5.47608	0.000132947	0.0128986	down
Cg14775	2144.86	774.21	2142.14	514.511	519.506	171.354	1687.07	401.791	- && - && -	2.07032	0.000139199	0.0134355	up
novel.4175	0	0	0	42.5536	31.6305	0.819877	0	25.0013	- && - && -	-7.00219	0.00014124	0.0135626	down
Cg19945	163.247	182.605	383.939	37.7179	76.6799	59.851	243.264	58.083	- && sp|P43114|PE2R4_RAT Prostaglandin E2 receptor EP4 subtype OS=Rattus norvegicus OX=10116 GN=Ptger4 PE=2 SV=1 && PF00001:7 transmembrane receptor (rhodopsin family)	2.06611	0.000142713	0.0135841	up
novel.5803	0	0	0	44.4878	5.75099	13.118	0	21.1189	- && - && -	-6.75949	0.000142914	0.0135841	down
Cg07536	3477.05	584.151	1900.44	51.2577	346.977	514.883	1987.22	304.372	- && - && -	2.70627	0.000144178	0.0135913	up
Cg17244	95.327	12.1116	6.4168	0	1.917	0	37.9518	0.638999	- && sp|P14316|IRF2_HUMAN Interferon regulatory factor 2 OS=Homo sapiens OX=9606 GN=IRF2 PE=1 SV=2 && PF00605:Interferon regulatory factor transcription factor	5.93168	0.000144441	0.0135913	up
novel.3007	28.5981	25.1548	10.6947	135.398	111.186	81.1679	21.4825	109.25	- && - && -	-2.34693	0.000148187	0.013874	down
Cg21436	855.56	509.618	899.422	237.913	272.214	255.802	754.867	255.309	- && sp|O77245|E75_METEN Nuclear hormone receptor E75 OS=Metapenaeus ensis OX=32278 GN=E75 PE=2 SV=1 && PF00105:Zinc finger, C4 type (two domains)|PF00104:Ligand-binding domain of nuclear hormone receptor	1.56364	0.000150375	0.0140088	up
novel.118	8.34111	1.86332	5.34734	13.5398	111.186	59.851	5.18392	61.5256	- && - && -	-3.58984	0.000154365	0.0142389	down
Cg14199	877.008	843.153	925.089	281.434	223.33	405.839	881.75	303.534	- && sp|Q704S8|CACP_RAT Carnitine O-acetyltransferase OS=Rattus norvegicus OX=10116 GN=Crat PE=1 SV=1 && PF00755:Choline/Carnitine o-acyltransferase	1.53786	0.000154704	0.0142389	up
Cg21313	86.9859	179.81	131.544	392.653	701.621	339.429	132.78	477.901	- && - && PF00822:PMP-22/EMP/MP20/Claudin family	-1.84556	0.000155126	0.0142389	down
Cg22594	7.14952	58.6946	221.38	0.967126	3.83399	13.118	95.7413	5.97305	- && - && -	3.98714	0.000156464	0.0142558	up
Cg20228	327.687	221.735	83.4185	62.8632	36.423	18.8572	210.947	39.3811	- && - && PF00822:PMP-22/EMP/MP20/Claudin family	2.42394	0.000156833	0.0142558	up
Cg17259	17.8738	77.3278	41.7092	0	0	5.73914	45.637	1.91305	- && sp|Q58D56|DRG2_BOVIN Developmentally-regulated GTP-binding protein 2 OS=Bos taurus OX=9913 GN=DRG2 PE=2 SV=1 && PF16897:C-terminal region of MMR_HSR1 domain|PF02824:TGS domain|PF01926:50S ribosome-binding GTPase	4.52323	0.000159087	0.0143908	up
novel.2100	7.14952	10.2483	3.2084	74.4687	29.7135	70.5095	6.86873	58.2305	- && - && -	-3.07594	0.000162235	0.014544	down
Cg19635	529.065	619.554	291.965	37.7179	114.061	171.354	480.195	107.711	- && sp|Q61471|TOB1_MOUSE Protein Tob1 OS=Mus musculus OX=10090 GN=Tob1 PE=1 SV=2 && PF07742:BTG family	2.15493	0.000162334	0.014544	up
Cg11724	53.6214	19.5649	56.6818	1.93425	0.958499	6.55902	43.2894	3.15059	- && - && PF07707:BTB And C-terminal Kelch|PF01344:Kelch motif	3.75087	0.000163285	0.0145596	up
Cg09355	1.19159	0	0	51.2577	5.75099	27.056	0.397196	28.0215	- && - && -	-6.20658	0.000166057	0.0146186	down
Cg22946	1002.12	1587.55	1824.51	582.21	421.739	519.802	1471.4	507.917	- && sp|Q7Z3S7|CA2D4_HUMAN Voltage-dependent calcium channel subunit alpha-2/delta-4 OS=Homo sapiens OX=9606 GN=CACNA2D4 PE=1 SV=2 && PF00092:von Willebrand factor type A domain	1.53464	0.000166389	0.0146186	up
Cg06186	177.547	442.539	351.855	1348.17	641.236	1574.16	323.98	1187.86	- && - && -	-1.87362	0.000167597	0.0146186	down
Cg27432	0	0	0	42.5536	5.75099	13.118	0	20.4742	- && - && PF03067:Lytic polysaccharide mono-oxygenase, cellulose-degrading	-6.7148	0.000167807	0.0146186	down
Cg04052	1018.81	657.752	504.789	179.885	306.72	165.615	727.116	217.407	- && sp|Q9JMA9|S6A14_MOUSE Sodium- and chloride-dependent neutral and basic amino acid transporter B(0+) OS=Mus musculus OX=10090 GN=Slc6a14 PE=1 SV=1 && PF00209:Sodium:neurotransmitter symporter family	1.74197	0.00016785	0.0146186	up
novel.5271	184.696	11.1799	16.042	859.775	364.23	484.548	70.6393	569.517	- && - && -	-3.0157	0.000170498	0.0147804	down
novel.1348	1.19159	0	0	31.9152	33.5475	10.6584	0.397196	25.3737	- && - && -	-6.06183	0.00017208	0.0148101	down
Cg15898	79.8364	93.1661	96.2521	14.5069	13.419	26.2361	89.7515	18.054	- && sp|Q4LDD4|ARAP1_MOUSE Arf-GAP with Rho-GAP domain, ANK repeat and PH domain-containing protein 1 OS=Mus musculus OX=10090 GN=Arap1 PE=1 SV=2 && PF00169:PH domain|PF07647:SAM domain (Sterile alpha motif)|PF01412:Putative GTPase activating protein for Arf|PF00620:RhoGAP domain	2.3081	0.000172422	0.0148101	up
novel.753	0	0	0	11.6055	36.423	9.83853	0	19.289	- && - && -	-6.62856	0.00017446	0.0149167	down
Cg16785	4343.34	1033.21	3398.77	416.831	925.91	804.3	2925.1	715.68	- && sp|O57321|EAA1_AMBTI Excitatory amino acid transporter 1 OS=Ambystoma tigrinum OX=8305 GN=SLC1A3 PE=1 SV=1 && PF00375:Sodium:dicarboxylate symporter family	2.03092	0.000178514	0.015194	up
novel.2733	0	1.86332	2.13893	49.3234	14.3775	33.615	1.33409	32.4386	- && - && -	-4.56263	0.000181484	0.0152859	down
Cg25665	30.9813	869.239	1468.38	27.0795	92.0159	139.379	789.533	86.1582	- && - && -	3.19512	0.000181613	0.0152859	up
Cg17296	51.2383	62.4213	249.186	914.901	365.188	546.038	120.948	608.709	- && sp|P07201|RIR2_SPISO Ribonucleoside-diphosphate reductase small chain OS=Spisula solidissima OX=6584 PE=2 SV=2 && PF00268:Ribonucleotide reductase, small chain	-2.33126	0.000182043	0.0152859	down
Cg19596	52.4298	66.1479	49.1955	521.281	73.8044	281.218	55.9244	292.101	- && sp|Q2KHY5|FAP24_BOVIN Fanconi anemia core complex-associated protein 24 OS=Bos taurus OX=9913 GN=FAAP24 PE=2 SV=1 && PF12826:Helix-hairpin-helix motif|PF17949:FANCM pseudonuclease domain	-2.38391	0.000184922	0.0153734	down
Cg11103	17004	4308	8702.26	3413.96	1980.26	2621.15	10004.7	2671.79	- && sp|Q9BXW7|HDHD5_HUMAN Haloacid dehalogenase-like hydrolase domain-containing 5 OS=Homo sapiens OX=9606 GN=HDHD5 PE=1 SV=1 && PF13344:Haloacid dehalogenase-like hydrolase	1.90477	0.000185523	0.0153734	up
Cg06368	2066.21	1244.7	2640.51	820.123	410.237	624.747	1983.81	618.369	- && sp|P82251|BAT1_HUMAN b(0,+)-type amino acid transporter 1 OS=Homo sapiens OX=9606 GN=SLC7A9 PE=1 SV=1 && PF13520:Amino acid permease	1.68164	0.000185549	0.0153734	up
Cg20757	1010.47	1611.77	2605.22	589.947	363.271	618.188	1742.49	523.802	- && - && -	1.73399	0.000187087	0.0154037	up
Cg09382	20.257	6.52162	8.55574	180.853	22.0455	92.6461	11.7781	98.5147	- && sp|P48416|CP10_LYMST Cytochrome P450 10 OS=Lymnaea stagnalis OX=6523 GN=CYP10 PE=2 SV=1 && PF00067:Cytochrome P450	-3.07567	0.00018756	0.0154037	down
Cg13298	41.7056	2.79498	5.34734	151.839	215.662	70.5095	16.616	146.003	- && sp|O15439|MRP4_HUMAN ATP-binding cassette sub-family C member 4 OS=Homo sapiens OX=9606 GN=ABCC4 PE=1 SV=3 && PF00005:ABC transporter|PF00664:ABC transporter transmembrane region	-3.15098	0.000193207	0.0157983	down
Cg01259	56.0046	42.8564	24.5977	0	5.75099	0	41.1529	1.917	- && - && -	4.45086	0.000194103	0.0158025	up
Cg03496	109.626	465.83	757.183	71.5673	9.58499	106.584	444.213	62.5788	- && - && -	2.82601	0.000195732	0.0158236	up
Cg20091	198.995	40.9931	387.147	9.67126	55.5929	9.01865	209.045	24.7609	- && sp|Q9I8C7|ACH10_CHICK Neuronal acetylcholine receptor subunit alpha-10 OS=Gallus gallus OX=9031 GN=CHRNA10 PE=3 SV=1 && PF02932:Neurotransmitter-gated ion-channel transmembrane region|PF02931:Neurotransmitter-gated ion-channel ligand binding domain	3.08035	0.000196052	0.0158236	up
novel.3730	41.7056	658.684	69.5154	42.5536	22.0455	25.4162	256.635	30.0051	- && - && PF00643:B-box zinc finger	3.09844	0.000198531	0.0159532	up
Cg16644	257.383	20.4965	222.449	34.8165	15.336	15.5777	166.776	21.9101	- && sp|Q8LPL3|ASO_ARATH L-ascorbate oxidase OS=Arabidopsis thaliana OX=3702 GN=AAO PE=1 SV=1 && PF07731:Multicopper oxidase|PF00394:Multicopper oxidase|PF07732:Multicopper oxidase	2.92913	0.000199362	0.0159532	up
Cg25738	467.102	260.865	347.577	81.2386	126.522	122.982	358.515	110.247	- && sp|Q13115|DUS4_HUMAN Dual specificity protein phosphatase 4 OS=Homo sapiens OX=9606 GN=DUSP4 PE=1 SV=1 && PF00782:Dual specificity phosphatase, catalytic domain|PF00581:Rhodanese-like domain	1.70009	0.000201859	0.0160843	up
Cg11218	138.224	196.58	334.743	41.5864	59.4269	70.5095	223.183	57.1743	- && - && PF01146:Caveolin	1.9637	0.000203673	0.0161227	up
Cg20360	84.6027	63.3529	65.2375	330.757	245.376	165.615	71.0644	247.249	- && sp|Q5R9H4|A1CF_PONAB APOBEC1 complementation factor OS=Pongo abelii OX=9601 GN=A1CF PE=2 SV=1 && PF14709:double strand RNA binding domain from DEAD END PROTEIN 1|PF00076:RNA recognition motif. (a.k.a. RRM, RBD, or RNP domain)	-1.79967	0.000204451	0.0161227	down
Cg25260	505.233	941.909	2261.92	337.527	323.973	278.758	1236.36	313.419	- && - && -	1.98012	0.000204924	0.0161227	up
Cg09540	1159.41	3025.1	526.178	213.735	469.664	351.727	1570.23	345.042	- && sp|Q9Y5X9|LIPE_HUMAN Endothelial lipase OS=Homo sapiens OX=9606 GN=LIPG PE=1 SV=1 && PF00151:Lipase	2.18629	0.000205856	0.0161283	up
Cg07489	85.7943	100.619	308.007	1179.89	333.558	798.561	164.807	770.671	- && sp|Q40965|RNS2_PYRPY Ribonuclease S-2 OS=Pyrus pyrifolia OX=3767 PE=1 SV=1 && PF00445:Ribonuclease T2 family	-2.22529	0.000210928	0.0164568	down
Cg15730	79.8364	48.4463	865.199	59.9618	14.3775	32.7951	331.161	35.7115	- && - && PF00386:C1q domain	3.21342	0.000212735	0.0165289	up
Cg09666	52.4298	55.8996	36.3619	4.83563	0	7.3789	48.2305	4.07151	- && sp|Q8QFX6|NRP1A_DANRE Neuropilin-1a OS=Danio rerio OX=7955 GN=nrp1a PE=2 SV=1 && PF05345:Putative Ig domain|PF00008:EGF-like domain|PF00754:F5/8 type C domain	3.54934	0.000214848	0.0165924	up
Cg09875	2070.98	983.834	550.776	264.025	46.9664	356.647	1201.86	222.546	- && sp|Q01528|HAAF_LIMPO Hemagglutinin/amebocyte aggregation factor OS=Limulus polyphemus OX=6850 PE=1 SV=1 && PF14704:Dermatopontin	2.43238	0.000216016	0.0165924	up
Cg22001	84.6027	18.6332	306.937	0.967126	7.66799	24.5963	136.724	11.0771	- && - && -	3.61468	0.000217521	0.0165924	up
Cg23509	1230.91	607.443	681.251	252.42	230.04	329.591	839.868	270.683	- && sp|Q4R562|ARRB1_MACFA Beta-arrestin-1 OS=Macaca fascicularis OX=9541 GN=ARRB1 PE=2 SV=1 && PF00339:Arrestin (or S-antigen), N-terminal domain|PF02752:Arrestin (or S-antigen), C-terminal domain	1.63278	0.000217918	0.0165924	up
Cg22919	989.017	773.278	1138.98	385.883	362.313	341.069	967.093	363.088	- && - && -	1.4133	0.000217982	0.0165924	up
Cg01450	0	3.72664	1.06947	83.1729	0.958499	71.3293	1.5987	51.8202	- && - && -	-4.96466	0.00022041	0.0167092	down
Cg06400	104.86	152.792	220.31	41.5864	47.9249	32.7951	159.321	40.7688	- && sp|Q9N294|B3GT5_PANPA Beta-1,3-galactosyltransferase 5 (Fragment) OS=Pan paniscus OX=9597 GN=B3GALT5 PE=3 SV=1 && PF01762:Galactosyltransferase	1.96846	0.000227224	0.0171564	up
novel.5048	400.373	299.063	394.633	56.0933	73.8044	163.975	364.69	97.9577	- && - && -	1.89372	0.000231535	0.0174037	up
Cg08421	198.995	1177.62	130.475	124.759	54.6344	60.6709	502.363	80.0215	- && - && -	2.65155	0.00023236	0.0174037	up
Cg28901	0	0	0	49.3234	0.958499	18.0373	0	22.7731	- && sp|O35678|MGLL_MOUSE Monoglyceride lipase OS=Mus musculus OX=10090 GN=Mgll PE=1 SV=1 && PF12146:Serine aminopeptidase, S33	-6.86884	0.000240708	0.0178943	down
novel.4092	33.3644	1.86332	22.4588	0	0	0	19.2289	0	- && - && -	6.83631	0.00024082	0.0178943	up
Cg26108	78.6448	26.0865	68.4459	7.73701	10.5435	4.09939	57.7257	7.45996	- && sp|Q6NT16|S18B1_HUMAN MFS-type transporter SLC18B1 OS=Homo sapiens OX=9606 GN=SLC18B1 PE=1 SV=1 && PF07690:Major Facilitator Superfamily	2.9575	0.000243516	0.0179682	up
Cg12031	4313.55	14388.6	3968.79	1441.99	690.119	2790.04	7556.97	1640.72	- && - && PF00965:Tissue inhibitor of metalloproteinase	2.20341	0.000243735	0.0179682	up
Cg23010	377.733	172.357	120.85	51.2577	63.2609	49.1926	223.647	54.5704	- && sp|Q20930|MIG17_CAEEL Metalloprotease mig-17 OS=Caenorhabditis elegans OX=6239 GN=mig-17 PE=1 SV=3 && PF17771:ADAM cysteine-rich domain|PF13688:Metallo-peptidase family M12	2.03439	0.00024963	0.0183307	up
Cg29543	316.962	2374.8	1075.88	92.8441	209.911	395.181	1255.88	232.645	- && - && PF01734:Patatin-like phospholipase	2.43209	0.000250819	0.0183461	up
Cg20090	1932.75	1715.19	2317.54	370.409	599.062	958.437	1988.49	642.636	- && sp|Q5XGP7|SKA2A_XENLA Src kinase-associated phosphoprotein 2-A OS=Xenopus laevis OX=8355 GN=skap2-a PE=2 SV=1 && PF00169:PH domain	1.6292	0.000256443	0.0185754	up
Cg19464	797.172	1080.73	832.046	319.152	383.399	327.131	903.315	343.227	- && - && -	1.39635	0.000256896	0.0185754	up
Cg00752	0	0	0	16.4411	13.419	21.3168	0	17.059	- && - && PF13960:Domain of unknown function (DUF4218)	-6.45335	0.000257637	0.0185754	down
Cg11421	150.14	299.063	204.268	13.5398	44.0909	75.4287	217.824	44.3531	- && - && -	2.29293	0.000257923	0.0185754	up
Cg12842	163.247	196.58	363.619	67.6988	62.3024	73.789	241.149	67.9301	- && - && PF06625:Protein of unknown function (DUF1151)	1.8275	0.000259731	0.0186339	up
novel.4667	35.7476	3.72664	260.95	0	0	0	100.141	0	- && - && -	9.22041	0.000266642	0.0190565	up
Cg24627	1080.77	236.642	763.6	68.666	235.791	149.218	693.67	151.225	- && sp|P43301|EGR3_RAT Early growth response protein 3 OS=Rattus norvegicus OX=10116 GN=Egr3 PE=2 SV=1 && -	2.19709	0.000267656	0.0190565	up
Cg20571	3.57476	0.931661	3.2084	18.3754	25.8795	66.4101	2.57161	36.8883	- && - && -	-3.8709	0.000272793	0.0193487	down
novel.319	58.3878	40.9931	17.1115	304.645	93.9329	172.174	38.8308	190.251	- && - && -	-2.29467	0.000274345	0.0193853	down
novel.6714	650.607	405.272	413.884	145.069	94.8914	209.889	489.921	149.95	- && - && -	1.70656	0.000277896	0.0195624	up
Cg26416	137.033	108.073	269.506	34.8165	36.423	54.1119	171.537	41.7838	- && sp|Q13972|RGRF1_HUMAN Ras-specific guanine nucleotide-releasing factor 1 OS=Homo sapiens OX=9606 GN=RASGRF1 PE=1 SV=2 && PF00617:RasGEF domain|PF00169:PH domain|PF00621:RhoGEF domain|PF00618:RasGEF N-terminal motif	2.03507	0.000280648	0.0196822	up
Cg03720	11.9159	64.2846	6.4168	539.656	41.2154	172.174	27.5391	251.015	- && sp|Q9V5L3|C49A1_DROME Probable cytochrome P450 49a1 OS=Drosophila melanogaster OX=7227 GN=Cyp49a1 PE=2 SV=3 && PF00067:Cytochrome P450	-3.18033	0.000287207	0.020067	down
Cg11212	67.9205	78.2595	2.13893	733.082	154.318	291.056	49.4396	392.819	- && - && PF01146:Caveolin	-2.98933	0.000288849	0.0201067	down
Cg05941	178.738	121.116	128.336	341.396	1079.27	296.796	142.73	572.487	- && sp|P0C551|PA2A_BUNFA Acidic phospholipase A2 KBf-grIB (Fragment) OS=Bungarus fasciatus OX=8613 PE=2 SV=1 && PF00068:Phospholipase A2	-2.00449	0.000297789	0.0206522	down
Cg24134	2601.24	386.639	1390.31	393.62	376.69	235.305	1459.39	335.205	- && - && PF13927:Immunoglobulin domain	2.12224	0.000300249	0.020746	up
Cg27134	6475.09	11037.4	13743.7	991.304	1173.2	4929.92	10418.7	2364.81	- && sp|Q9VQH2|DUOX_DROME Dual oxidase OS=Drosophila melanogaster OX=7227 GN=Duox PE=1 SV=2 && PF03098:Animal haem peroxidase|PF01794:Ferric reductase like transmembrane component|PF08030:Ferric reductase NAD binding domain|PF08022:FAD-binding domain	2.13927	0.000303353	0.0208834	up
Cg22912	2760.91	2821.07	2825.53	893.625	488.834	1370.02	2802.5	917.491	- && - && PF13639:Ring finger domain	1.6107	0.000305067	0.0208891	up
Cg21100	126.308	379.186	275.923	56.0933	65.1779	84.4474	260.472	68.5729	- && sp|Q9HAR2|AGRL3_HUMAN Adhesion G protein-coupled receptor L3 OS=Homo sapiens OX=9606 GN=ADGRL3 PE=1 SV=2 && PF16489:GPCR-Autoproteolysis INducing (GAIN) domain|PF00002:7 transmembrane receptor (Secretin family)|PF01825:GPCR proteolysis site, GPS, motif|PF00431:CUB domain|PF07679:Immunoglobulin I-set domain	1.92545	0.000305667	0.0208891	up
Cg24292	2692.99	1831.64	3088.62	644.106	831.977	1193.74	2537.75	889.941	- && - && -	1.51149	0.000309327	0.0210624	up
Cg29177	1251.17	1273.58	539.012	2626.72	2981.89	3624.68	1021.25	3077.76	- && - && PF00080:Copper/zinc superoxide dismutase (SODC)	-1.59155	0.000311686	0.0211461	down
Cg26802	3.57476	5.58996	0	118.957	3.83399	52.4721	3.05491	58.4209	- && - && -	-4.24394	0.000315472	0.0212574	down
Cg23929	59.5794	51.2413	18.1809	209.866	194.575	134.46	43.0005	179.634	- && - && -	-2.0631	0.000315597	0.0212574	down
Cg03643	0	0	0	22.2439	18.2115	9.83853	0	16.7646	- && - && -	-6.42616	0.000319027	0.0214114	down
Cg24654	3036.16	1887.54	4067.18	498.07	1226.88	1042.88	2996.96	922.611	- && sp|Q1HG43|DOXA1_HUMAN Dual oxidase maturation factor 1 OS=Homo sapiens OX=9606 GN=DUOXA1 PE=1 SV=1 && PF10204:Dual oxidase maturation factor	1.69958	0.000325035	0.0217367	up
Cg18944	16.6822	60.5579	21.3893	290.138	96.8084	132	32.8765	172.982	- && - && PF12736:Cell-cycle sustaining, positive selection,	-2.38741	0.000327666	0.0218347	down
Cg21124	25.0233	24.2232	21.3893	57.0605	156.235	112.323	23.5453	108.54	- && sp|Q2QVI1|CML28_ORYSJ Probable calcium-binding protein CML28 OS=Oryza sativa subsp. japonica OX=39947 GN=CML28 PE=2 SV=1 && PF13499:EF-hand domain pair	-2.20511	0.00032999	0.0219116	down
Cg14531	30.9813	1.86332	21.3893	0	0	0	18.078	0	- && - && -	6.74723	0.000336567	0.0222693	up
Cg11089	0	1.86332	0	51.2577	18.2115	15.5777	0.621107	28.3489	- && - && -	-5.39433	0.000339435	0.02238	down
Cg25292	0	2.79498	2.13893	93.8113	0	70.5095	1.64464	54.7736	- && - && -	-5.0224	0.000341203	0.0224176	down
novel.7411	11.9159	18.6332	154.003	7.73701	3.83399	2.45963	61.5175	4.67688	- && - && PF00643:B-box zinc finger	3.72598	0.000343407	0.0224836	up
Cg06986	1630.09	2111.14	2068.35	479.695	617.273	974.014	1936.53	690.327	- && sp|Q5XGP7|SKA2A_XENLA Src kinase-associated phosphoprotein 2-A OS=Xenopus laevis OX=8355 GN=skap2-a PE=2 SV=1 && PF00169:PH domain|PF00018:SH3 domain	1.48785	0.000344955	0.0225062	up
novel.7166	0	9.31661	0	80.2715	25.8795	54.9318	3.10554	53.6942	- && - && -	-4.05739	0.000346659	0.0225388	down
novel.6102	289.556	212.419	173.254	65.7646	72.8459	74.6088	225.076	71.0731	- && - && PF00229:TNF(Tumour Necrosis Factor) family	1.66211	0.000348894	0.0226057	up
Cg26821	543.364	587.878	1069.47	104.45	185.949	323.032	733.57	204.477	- && - && PF00085:Thioredoxin|PF03265:Deoxyribonuclease II	1.84198	0.000351432	0.0226916	up
Cg10251	1471.61	943.772	1679.06	277.565	525.257	560.796	1364.82	454.54	- && sp|Q9NZQ3|SPN90_HUMAN NCK-interacting protein with SH3 domain OS=Homo sapiens OX=9606 GN=NCKIPSD PE=1 SV=1 && PF09431:Protein of unknown function (DUF2013)|PF00178:Ets-domain	1.58583	0.000354483	0.02281	up
Cg24861	26.2149	29.8131	27.8062	0.967126	0.958499	3.27951	27.9447	1.73504	- && sp|Q8K1S4|UNC5A_MOUSE Netrin receptor UNC5A OS=Mus musculus OX=10090 GN=Unc5a PE=1 SV=1 && PF00090:Thrombospondin type 1 domain	3.97925	0.000367151	0.0235442	up
Cg24567	5.95794	7.45328	4.27787	40.6193	48.8834	42.6336	5.89636	44.0455	- && - && PF00097:Zinc finger, C3HC4 type (RING finger)	-2.89568	0.000379499	0.0242529	down
Cg05422	481.401	1411.47	670.556	142.168	126.522	373.864	854.474	214.184	- && - && -	1.9955	0.000388073	0.0246678	up
Cg23850	42.8971	81.9861	32.084	393.62	115.978	186.932	52.3224	232.177	- && sp|Q9JJ66|CDC20_MOUSE Cell division cycle protein 20 homolog OS=Mus musculus OX=10090 GN=Cdc20 PE=1 SV=2 && PF00400:WD domain, G-beta repeat|PF12894:Anaphase-promoting complex subunit 4 WD40 domain	-2.14607	0.000388624	0.0246678	down
Cg29610	32.1729	40.0614	57.7512	4.83563	4.79249	7.3789	43.3285	5.66901	- && - && -	2.9281	0.000390492	0.0247025	up
Cg09262	9.5327	0	1.06947	105.417	17.253	40.9939	3.53406	54.5545	- && - && PF01753:MYND finger	-3.99374	0.00039907	0.0251602	down
novel.3909	0	0	0	33.8494	0.958499	25.4162	0	20.0747	- && - && -	-6.68789	0.00040445	0.0254138	down
Cg22574	126.308	82.9178	235.283	30.948	37.3814	40.174	148.17	36.1678	- && - && PF18112:Autophagy receptor zinc finger-C2H2 domain	2.03297	0.000418421	0.0262038	up
Cg25055	23414.7	21665.8	10422	8518.45	2350.24	1152.75	18500.8	4007.14	- && - && -	2.20698	0.00042133	0.026298	up
Cg07535	10508.6	10658.2	6882.02	1511.62	3067.2	4442.1	9349.61	3006.97	- && - && -	1.63652	0.000425508	0.0264706	up
Cg21023	307.43	1053.71	1551.8	193.425	258.795	304.174	970.978	252.131	- && sp|P17666|CP2CE_RABIT Cytochrome P450 2C14 OS=Oryctolagus cuniculus OX=9986 GN=CYP2C14 PE=2 SV=1 && PF00067:Cytochrome P450	1.94521	0.000428573	0.026573	up
Cg17377	3858.36	300.926	4537.75	46.4221	321.097	51.6523	2899.01	139.724	- && sp|A9XE49|IL17L_CRAGI Interleukin 17-like protein OS=Crassostrea gigas OX=29159 PE=2 SV=1 && PF06083:Interleukin-17	4.37512	0.000441556	0.0272876	up
Cg13294	558.854	729.49	1107.97	204.064	168.696	377.144	798.771	249.968	- && sp|Q13905|RPGF1_HUMAN Rap guanine nucleotide exchange factor 1 OS=Homo sapiens OX=9606 GN=RAPGEF1 PE=1 SV=3 && PF00618:RasGEF N-terminal motif|PF00617:RasGEF domain	1.67529	0.000443757	0.0273334	up
Cg18932	1.19159	0	0	5.80276	59.4269	9.83853	0.397196	25.0227	- && sp|Q3USW5|FXRD2_MOUSE FAD-dependent oxidoreductase domain-containing protein 2 OS=Mus musculus OX=10090 GN=Foxred2 PE=2 SV=1 && PF13738:Pyridine nucleotide-disulphide oxidoreductase	-6.0422	0.000450183	0.0276383	down
novel.6011	8.34111	0	0	67.6988	39.2984	30.3355	2.78037	45.7776	- && - && -	-4.0995	0.000465373	0.0284775	down
Cg21792	900.84	1036.94	1568.91	382.982	172.53	518.162	1168.9	357.891	- && sp|Q18179|NPR11_CAEEL Putative neuropeptide Y receptor 11 OS=Caenorhabditis elegans OX=6239 GN=npr-11 PE=3 SV=2 && PF00001:7 transmembrane receptor (rhodopsin family)	1.7071	0.000467137	0.0284923	up
Cg13811	73.8784	7.45328	79.1406	7.73701	2.8755	0	53.4908	3.5375	- && - && -	3.93679	0.000473358	0.028719	up
Cg10265	39.3224	74.5328	56.6818	304.645	110.227	235.305	56.8457	216.726	- && - && -	-1.92784	0.000473922	0.028719	down
novel.4933	48.8551	52.173	38.5008	150.872	159.111	146.758	46.5096	152.247	- && B6LS00.1 RecName: Full=UPF0728 protein && -	-1.71009	0.000475658	0.0287313	down
Cg24258	1.19159	0	0	27.0795	13.419	21.3168	0.397196	20.6051	- && sp|Q9CR58|KMCP1_MOUSE Kidney mitochondrial carrier protein 1 OS=Mus musculus OX=10090 GN=Slc25a30 PE=1 SV=1 && PF00153:Mitochondrial carrier protein	-5.76331	0.000483489	0.0291104	down
Cg14322	86.9859	97.8244	55.6123	489.366	132.273	305.814	80.1408	309.151	- && sp|Q1ZZU3|SWI5_HUMAN DNA repair protein SWI5 homolog OS=Homo sapiens OX=9606 GN=SWI5 PE=1 SV=1 && PF07061:Swi5	-1.94713	0.000486712	0.0291317	down
novel.4877	182.313	63.3529	80.2101	32.8823	7.66799	18.0373	108.625	19.5292	- && - && -	2.47491	0.000488384	0.0291317	up
Cg13745	207.336	73.6012	11.7641	3.86851	18.2115	9.83853	97.5672	10.6395	- && - && PF13359:DDE superfamily endonuclease	3.19583	0.00048851	0.0291317	up
Cg15198	16.6822	25.1548	21.3893	181.82	44.0909	96.7455	21.0755	107.552	- && sp|P62290|ASPM_HYLLA Abnormal spindle-like microcephaly-associated protein homolog OS=Hylobates lar OX=9580 GN=ASPM PE=3 SV=1 && PF00307:Calponin homology (CH) domain|PF15780:Abnormal spindle-like microcephaly-assoc'd, ASPM-SPD-2-Hydin	-2.3477	0.000493568	0.029308	down
Cg09323	121.542	579.493	473.774	8.70414	84.3479	101.665	391.603	64.9056	- && - && -	2.59187	0.000494597	0.029308	up
novel.5633	90.5606	23.2915	109.086	3.86851	19.17	2.45963	74.3126	8.49937	- && - && -	3.13527	0.000502945	0.0297087	up
novel.3176	7.14952	0	3.2084	58.0276	21.087	48.3728	3.45264	42.4958	- && - && -	-3.66294	0.000514979	0.0301283	down
Cg16284	179.93	445.334	121.919	1733.09	443.785	951.058	249.061	1042.64	- && sp|P24861|CCNA_PATVU G2/mitotic-specific cyclin-A OS=Patella vulgata OX=6465 PE=2 SV=1 && PF16500:N-terminal region of cyclin_N|PF00134:Cyclin, N-terminal domain|PF02984:Cyclin, C-terminal domain	-2.06457	0.000516251	0.0301283	down
Cg24007	38.1308	27.0182	20.3199	323.987	28.755	160.696	28.4896	171.146	- && - && -	-2.58855	0.000517421	0.0301283	down
Cg03574	0	0	0	20.3097	14.3775	11.4783	0	15.3885	- && - && PF00084:Sushi repeat (SCR repeat)	-6.30305	0.000517586	0.0301283	down
Cg06771	212.103	169.562	181.809	19.3425	63.2609	62.3107	187.825	48.3047	- && sp|Q0VD32|CRBL2_BOVIN cAMP-responsive element-binding protein-like 2 OS=Bos taurus OX=9913 GN=CREBL2 PE=1 SV=1 && -	1.9569	0.000518649	0.0301283	up
novel.5816	0	8.38495	0	83.1729	15.336	53.292	2.79498	50.6003	- && - && PF00589:Phage integrase family	-4.12326	0.000519802	0.0301283	down
Cg19009	50.0467	60.5579	64.168	228.242	151.443	174.634	58.2575	184.773	- && sp|Q9NPJ3|ACO13_HUMAN Acyl-coenzyme A thioesterase 13 OS=Homo sapiens OX=9606 GN=ACOT13 PE=1 SV=1 && PF08241:Methyltransferase domain|PF03061:Thioesterase superfamily	-1.664	0.000523647	0.0301283	down
Cg30571	22.6402	10.2483	23.5283	191.491	23.004	142.659	18.8056	119.051	- && - && -	-2.6676	0.000524678	0.0301283	down
Cg10995	2493.99	2113.94	2140	593.816	411.196	1207.68	2249.31	737.564	- && sp|Q497B2|TM45B_RAT Transmembrane protein 45B OS=Rattus norvegicus OX=10116 GN=Tmem45b PE=1 SV=1 && PF04819:Family of unknown function (DUF716)	1.60824	0.000525931	0.0301283	up
novel.4593	2.38317	0	4.27787	88.0085	1.917	52.4721	2.22035	47.4659	- && - && -	-4.44193	0.000526139	0.0301283	down
Cg29594	1790.96	784.458	2092.95	192.458	669.032	423.877	1556.12	428.456	- && - && PF12796:Ankyrin repeats (3 copies)|PF07714:Protein tyrosine and serine/threonine kinase	1.86059	0.000530052	0.0301541	up
Cg22696	4.76635	15.8382	20.3199	87.0414	63.2609	75.4287	13.6415	75.2437	- && - && -	-2.45467	0.000530201	0.0301541	down
Cg20709	14.299	4.6583	0	156.674	14.3775	60.6709	6.31912	77.241	- && sp|Q99NH7|S26A5_MOUSE Prestin OS=Mus musculus OX=10090 GN=Slc26a5 PE=2 SV=3 && PF00916:Sulfate permease family|PF01740:STAS domain	-3.62793	0.000531421	0.0301541	down
novel.6971	0	7.45328	2.13893	76.403	19.17	36.0746	3.19741	43.8825	- && - && -	-3.73351	0.000537319	0.0301873	down
Cg21028	737.593	1390.04	901.561	162.477	365.188	423.877	1009.73	317.181	- && sp|Q6PEH9|S39AA_DANRE Zinc transporter ZIP10 OS=Danio rerio OX=7955 GN=slc39a10 PE=2 SV=1 && PF02535:ZIP Zinc transporter	1.67038	0.000537472	0.0301873	up
Cg23995	16.6822	5.58996	1.06947	153.773	14.3775	71.3293	7.78055	79.8266	- && sp|Q9H1Q7|PED1A_HUMAN PC-esterase domain-containing protein 1A OS=Homo sapiens OX=9606 GN=PCED1A PE=1 SV=1 && -	-3.37348	0.000538842	0.0301873	down
Cg05083	147.757	121.116	194.643	27.0795	40.2569	59.0312	154.505	42.1226	- && sp|P45885|ACT2_BACDO Actin-2, muscle-specific OS=Bactrocera dorsalis OX=27457 PE=2 SV=1 && PF00022:Actin	1.87154	0.00054032	0.0301873	up
Cg13482	117.967	72.6695	247.047	51.2577	19.17	12.2982	145.895	27.5753	- && sp|Q90252|MTR_RHIMB Mesotocin receptor OS=Rhinella marina OX=8386 PE=2 SV=1 && PF00001:7 transmembrane receptor (rhodopsin family)	2.40711	0.000540883	0.0301873	up
Cg18901	2.38317	3.72664	7.48627	38.6851	53.6759	27.8758	4.53203	40.0789	- && sp|P18461|FGFR2_CHICK Fibroblast growth factor receptor 2 OS=Gallus gallus OX=9031 GN=FGFR2 PE=2 SV=1 && PF07714:Protein tyrosine and serine/threonine kinase	-3.13904	0.000541678	0.0301873	down
Cg20354	3.57476	0	0	17.4083	51.7589	20.4969	1.19159	29.888	- && - && PF13927:Immunoglobulin domain	-4.73957	0.000543756	0.0302132	down
novel.2922	110.818	57.763	155.073	7.73701	30.672	0.819877	107.884	13.0763	- && - && -	3.05186	0.000549232	0.0303941	up
Cg16573	1301.21	595.331	758.252	198.261	387.233	282.858	884.932	289.451	- && sp|Q27J81|INF2_HUMAN Inverted formin-2 OS=Homo sapiens OX=9606 GN=INF2 PE=1 SV=2 && PF02181:Formin Homology 2 Domain|PF06371:Diaphanous GTPase-binding Domain|PF06367:Diaphanous FH3 Domain	1.6119	0.000550259	0.0303941	up
Cg09862	76.2616	49.378	62.0291	196.327	256.878	151.677	62.5562	201.627	- && - && PF00619:Caspase recruitment domain	-1.69038	0.000553506	0.0304258	down
Cg29571	13.1075	24.2232	13.9031	121.858	59.4269	68.8697	17.0779	83.3848	- && sp|Q9YH58|FTCD_CHICK Formimidoyltransferase-cyclodeaminase OS=Gallus gallus OX=9031 GN=FTCD PE=2 SV=1 && PF04961:Formiminotransferase-cyclodeaminase|PF07837:Formiminotransferase domain, N-terminal subdomain|PF02971:Formiminotransferase domain	-2.27996	0.000554083	0.0304258	down
Cg01239	3.57476	2.79498	7.48627	26.1124	38.3399	56.5715	4.61867	40.3413	- && sp|Q80U87|UBP8_MOUSE Ubiquitin carboxyl-terminal hydrolase 8 OS=Mus musculus OX=10090 GN=Usp8 PE=1 SV=2 && PF08969:USP8 dimerisation domain|PF13920:Zinc finger, C3HC4 type (RING finger)	-3.13265	0.000558122	0.030558	down
Cg10749	209.719	202.17	198.921	47.3892	90.0989	54.1119	203.604	63.8667	- && - && PF00001:7 transmembrane receptor (rhodopsin family)	1.67338	0.000577086	0.0315042	up
Cg18937	21.4486	38.1981	64.168	314.316	66.1364	212.348	41.2716	197.6	- && - && -	-2.25768	0.000587119	0.0319587	down
novel.5909	0	0.931661	2.13893	28.0467	38.3399	11.4783	1.02353	25.955	- && - && -	-4.63719	0.000590369	0.0320425	down
Cg14638	456.378	97.8244	1603.13	167.313	53.6759	143.479	719.111	121.489	- && - && PF15297:Cytoskeleton-associated protein 2 C-terminus	2.56505	0.000592502	0.0320653	up
Cg24340	756.658	999.672	690.876	293.039	392.026	228.746	815.735	304.604	- && - && PF00229:TNF(Tumour Necrosis Factor) family	1.42179	0.00059946	0.0323484	up
Cg18889	54.813	37.2664	31.0146	269.828	89.1404	137.739	41.0313	165.569	- && sp|Q8CEF1|FEM1C_MOUSE Protein fem-1 homolog C OS=Mus musculus OX=10090 GN=Fem1c PE=2 SV=1 && -	-2.0147	0.000616036	0.0331473	down
Cg21155	71.4952	72.6695	60.9596	208.899	358.479	135.28	68.3748	234.219	- && sp|Q8R1B8|RORB_MOUSE Nuclear receptor ROR-beta OS=Mus musculus OX=10090 GN=Rorb PE=1 SV=3 && PF00105:Zinc finger, C4 type (two domains)|PF00104:Ligand-binding domain of nuclear hormone receptor	-1.77558	0.000621314	0.0333355	down
Cg15178	21.4486	7.45328	78.0711	0.967126	0	4.09939	35.6577	1.68884	- && - && -	4.35966	0.00062863	0.0336317	up
Cg15519	151.332	195.649	363.619	20.3097	61.3439	86.0871	236.866	55.9136	- && sp|P47712|PA24A_HUMAN Cytosolic phospholipase A2 OS=Homo sapiens OX=9606 GN=PLA2G4A PE=1 SV=2 && PF01735:Lysophospholipase catalytic domain|PF00168:C2 domain	2.08043	0.000641364	0.0342152	up
novel.3836	26.2149	15.8382	24.5977	0	0	1.63975	22.217	0.546585	- && - && -	5.24827	0.000648436	0.0344942	up
Cg00131	536.214	6.52162	673.764	10.6384	23.004	4.09939	405.5	12.5806	- && sp|Q7SYH5|SC5A8_XENLA Sodium-coupled monocarboxylate transporter 1 OS=Xenopus laevis OX=8355 GN=slc5a8 PE=2 SV=1 && PF00474:Sodium:solute symporter family	5.01249	0.000664254	0.0352356	up
Cg24771	4.76635	13.9749	11.7641	64.7975	75.7214	40.174	10.1685	60.231	- && sp|Q99LZ3|SLD5_MOUSE DNA replication complex GINS protein SLD5 OS=Mus musculus OX=10090 GN=Gins4 PE=1 SV=1 && PF16922:DNA replication complex GINS protein SLD5 C-terminus|PF05916:GINS complex protein	-2.55333	0.000667824	0.0353249	down
Cg29630	179.93	520.798	350.785	84.14	143.775	75.4287	350.504	101.115	- && - && PF02157:Mannose-6-phosphate receptor	1.7951	0.000680803	0.03591	up
Cg26414	81.0279	65.2162	85.5574	294.006	262.629	157.416	77.2672	238.017	- && - && PF15104:Domain of unknown function (DUF4558)	-1.62353	0.000685976	0.0360333	down
Cg13931	453.995	651.231	1224.54	148.937	258.795	309.914	776.589	239.215	- && sp|Q9VF87|CYFIP_DROME Cytoplasmic FMR1-interacting protein OS=Drosophila melanogaster OX=7227 GN=Sra-1 PE=1 SV=1 && PF05994:Cytoplasmic Fragile-X interacting family	1.69845	0.000686989	0.0360333	up
Cg05299	942.546	291.61	331.535	166.346	172.53	77.8883	521.897	138.921	- && sp|P51452|DUS3_HUMAN Dual specificity protein phosphatase 3 OS=Homo sapiens OX=9606 GN=DUSP3 PE=1 SV=1 && PF00782:Dual specificity phosphatase, catalytic domain	1.90979	0.000689555	0.0360668	up
Cg17932	368.2	423.906	522.97	85.1071	179.239	178.733	438.359	147.693	- && sp|Q55E58|PATS1_DICDI Probable serine/threonine-protein kinase pats1 OS=Dictyostelium discoideum OX=44689 GN=pats1 PE=3 SV=1 && PF08477:Ras of Complex, Roc, domain of DAPkinase|PF16095:C-terminal of Roc, COR, domain|PF00531:Death domain	1.56893	0.000693946	0.0361329	up
novel.4936	13.1075	29.8131	84.4879	465.188	115.978	129.541	42.4695	236.902	- && - && -	-2.47819	0.000696837	0.0361329	down
Cg22737	0	0	0	6.76988	32.589	8.19877	0	15.8525	- && - && -	-6.34554	0.00069761	0.0361329	down
Cg25894	397.99	297.2	284.478	884.921	1465.54	555.877	326.556	968.781	- && - && PF08445:FR47-like protein	-1.56902	0.000698831	0.0361329	down
Cg18707	15.4906	16.7699	10.6947	101.548	47.9249	63.1306	14.3184	70.8679	- && sp|A6QLY2|GPX7_BOVIN Glutathione peroxidase 7 OS=Bos taurus OX=9913 GN=GPX7 PE=2 SV=1 && PF00255:Glutathione peroxidase	-2.30551	0.000700467	0.0361329	down
Cg20567	2.38317	24.2232	19.2504	0	0	0	15.2856	0	- && - && -	6.51212	0.000704652	0.0362238	up
Cg23713	71.4952	12.1116	4.27787	1.93425	0.958499	0	29.2949	0.96425	- && - && -	4.95998	0.000708527	0.0362238	up
Cg12767	1.19159	0.931661	0	7.73701	73.8044	5.73914	0.707749	29.0935	- && - && -	-5.36791	0.000709428	0.0362238	down
novel.7252	11.9159	0	0	85.1071	86.2649	15.5777	3.97196	62.3166	- && - && -	-4.01265	0.000709967	0.0362238	down
Cg05626	492.126	475.147	778.572	167.313	104.476	282.858	581.948	184.882	- && sp|Q7ZXF1|MTMR4_XENLA Myotubularin-related protein 4 OS=Xenopus laevis OX=8355 GN=mtmr4 PE=2 SV=1 && PF01363:FYVE zinc finger|PF06602:Myotubularin-like phosphatase domain	1.65314	0.000729583	0.0371235	up
Cg20033	996.167	1636	1311.17	301.743	304.803	705.095	1314.44	437.214	- && sp|O97772|CCKAR_RABIT Cholecystokinin receptor type A OS=Oryctolagus cuniculus OX=9986 GN=CCKAR PE=2 SV=1 && PF00001:7 transmembrane receptor (rhodopsin family)	1.58758	0.00073346	0.0372196	up
Cg03950	8.34111	11.1799	37.4314	0	0	0.819877	18.9841	0.273292	- && - && -	5.8598	0.000743116	0.0375707	up
Cg11337	397.99	294.405	627.777	141.2	179.239	133.64	440.057	151.36	- && sp|Q99758|ABCA3_HUMAN Phospholipid-transporting ATPase ABCA3 OS=Homo sapiens OX=9606 GN=ABCA3 PE=1 SV=2 && PF00005:ABC transporter|PF12698:ABC-2 family transporter protein	1.53978	0.000744391	0.0375707	up
novel.5231	0	19.5649	7.48627	609.29	44.0909	354.187	9.01705	335.856	- && - && -	-5.21062	0.000753689	0.0379377	down
Cg20245	47.6635	62.4213	51.3344	285.302	69.0119	305.814	53.8064	220.043	- && sp|O15066|KIF3B_HUMAN Kinesin-like protein KIF3B OS=Homo sapiens OX=9606 GN=KIF3B PE=1 SV=1 && PF00225:Kinesin motor domain	-2.03119	0.000766869	0.0383505	down
Cg25411	561.238	510.55	977.493	285.302	202.243	252.522	683.094	246.689	- && sp|Q10901|EAA1_CAEEL Excitatory amino acid transporter OS=Caenorhabditis elegans OX=6239 GN=glt-1 PE=1 SV=2 && PF00375:Sodium:dicarboxylate symporter family	1.46929	0.000767172	0.0383505	up
novel.4657	108.434	4.6583	6.4168	1.93425	2.8755	0	39.8365	1.60325	- && - && -	4.65796	0.000768681	0.0383505	up
Cg01105	75.07	118.321	258.811	39.6522	24.921	43.4535	150.734	36.0089	- && - && -	2.06463	0.000770081	0.0383505	up
Cg10113	509.999	394.092	577.512	113.154	93.9329	256.622	493.868	154.569	- && sp|Q9CR23|TMEM9_MOUSE Proton-transporting V-type ATPase complex assembly regulator TMEM9 OS=Mus musculus OX=10090 GN=Tmem9 PE=1 SV=1 && PF05434:TMEM9	1.67408	0.000782073	0.0388444	up
Cg19595	400.373	422.974	530.456	58.9947	109.269	225.466	451.268	131.243	- && sp|P52564|MP2K6_HUMAN Dual specificity mitogen-activated protein kinase kinase 6 OS=Homo sapiens OX=9606 GN=MAP2K6 PE=1 SV=1 && PF00069:Protein kinase domain	1.7799	0.000786492	0.0389391	up
Cg30103	1.19159	17.7016	63.0986	0.967126	0	0.819877	27.3306	0.595668	- && sp|Q9BYV7|BCDO2_HUMAN Beta,beta-carotene 9',10'-oxygenase OS=Homo sapiens OX=9606 GN=BCO2 PE=1 SV=5 && PF03055:Retinal pigment epithelial membrane protein	5.50636	0.000789378	0.0389391	up
novel.623	2.38317	13.9749	0	33.8494	4.79249	235.305	5.45269	91.3156	- && - && -	-4.04531	0.000791077	0.0389391	down
Cg27069	0	1.86332	4.27787	11.6055	87.2234	13.118	2.04706	37.3156	- && sp|P04464|CALM_WHEAT Calmodulin OS=Triticum aestivum OX=4565 PE=1 SV=3 && PF13499:EF-hand domain pair	-4.16932	0.000792298	0.0389391	down
Cg23589	66.7289	36.3348	8.55574	273.697	143.775	127.901	37.2065	181.791	- && - && -	-2.29198	0.000798342	0.039088	down
Cg03623	28.5981	8.38495	17.1115	0	0	0.819877	18.0315	0.273292	- && sp|Q8SWR3|SPR_DROME Sex peptide receptor OS=Drosophila melanogaster OX=7227 GN=SPR PE=1 SV=1 && PF10324:Serpentine type 7TM GPCR chemoreceptor Srw	5.78198	0.000801882	0.039088	up
Cg23476	815.046	256.207	1078.02	147.97	224.289	241.044	716.425	204.434	- && sp|Q3SZ54|IF4A1_BOVIN Eukaryotic initiation factor 4A-I OS=Bos taurus OX=9913 GN=EIF4A1 PE=2 SV=1 && PF00271:Helicase conserved C-terminal domain|PF00270:DEAD/DEAH box helicase	1.80853	0.000803003	0.039088	up
novel.2905	150.14	168.631	262.02	22.2439	85.3064	13.9379	193.597	40.4961	- && - && -	2.26037	0.000803678	0.039088	up
Cg14474	1310.75	1478.55	2716.45	444.878	760.089	743.629	1835.25	649.532	- && - && PF00092:von Willebrand factor type A domain	1.4984	0.000806464	0.0391218	up
Cg27027	0	2.79498	0	20.3097	12.4605	48.3728	0.931661	27.0476	- && sp|P41436|IAP_GVCPM Apoptosis inhibitor IAP OS=Cydia pomonella granulosis virus (isolate Mexico/1963) OX=654905 GN=IAP PE=4 SV=1 && PF13359:DDE superfamily endonuclease|PF13837:Myb/SANT-like DNA-binding domain	-4.76543	0.000812551	0.0393153	down
novel.341	5.95794	12.1116	14.9725	60.929	77.6384	42.6336	11.014	60.4003	- && - && -	-2.44729	0.00082038	0.0395918	down
Cg23885	26.2149	20.4965	1.06947	0	0	0	15.927	0	- && - && -	6.56738	0.00082539	0.0397312	up
Cg14648	82.2195	150.929	117.641	431.338	353.686	248.423	116.93	344.482	- && - && -	-1.55645	0.000829173	0.0398109	down
Cg15751	542.172	467.694	617.083	236.946	182.115	229.566	542.316	216.209	- && - && PF12796:Ankyrin repeats (3 copies)	1.32641	0.000832362	0.0398619	up
Cg21195	445.654	451.855	254.533	177.951	91.0574	113.963	384.014	127.657	- && - && -	1.58934	0.000835059	0.039889	up
Cg27186	1.19159	0	4.27787	78.3372	2.8755	35.2547	1.82315	38.8225	- && - && PF00335:Tetraspanin family	-4.43007	0.000841577	0.040098	down
Cg22522	313.387	531.978	760.391	77.3701	61.3439	262.361	535.252	133.692	- && - && -	1.9996	0.000845037	0.0401607	up
Cg27777	5.95794	20.4965	16.042	78.3372	70.9289	63.9504	14.1655	71.0722	- && sp|Q8MZC4|CRLS1_DROME Probable cardiolipin synthase (CMP-forming) OS=Drosophila melanogaster OX=7227 GN=CLS PE=2 SV=1 && PF01066:CDP-alcohol phosphatidyltransferase	-2.31491	0.000872627	0.0413669	down
Cg07491	154.906	169.562	144.378	811.419	135.148	944.499	156.282	630.355	- && - && -	-2.01206	0.000893383	0.0421581	down
Cg19398	84.6027	40.0614	159.351	23.211	7.66799	22.1367	94.6716	17.6719	- && sp|P15287|AGSA_APLCA Adenosine deaminase AGSA OS=Aplysia californica OX=6500 PE=1 SV=2 && PF00962:Adenosine/AMP deaminase|PF01833:IPT/TIG domain	2.41833	0.000893819	0.0421581	up
Cg13091	643.457	199.375	236.352	61.8961	143.775	81.1679	359.728	95.6129	- && sp|Q22328|LEV9_CAEEL Protein lev-9 OS=Caenorhabditis elegans OX=6239 GN=lev-9 PE=1 SV=3 && PF00084:Sushi repeat (SCR repeat)	1.91111	0.000905203	0.0425878	up
Cg09617	1401.31	1089.11	1328.28	475.826	436.117	656.722	1272.9	522.888	- && sp|Q8AVJ1|PRR5_XENLA Proline-rich protein 5 OS=Xenopus laevis OX=8355 GN=prr5 PE=2 SV=1 && PF08539:HbrB-like	1.28312	0.000909514	0.0426833	up
Cg20754	209.719	79.1911	97.3215	240.814	1059.14	305.814	128.744	535.257	- && - && PF01738:Dienelactone hydrolase family	-2.05728	0.000918273	0.0429626	down
Cg07294	21.4486	43.788	25.6672	93.8113	135.148	111.503	30.3013	113.488	- && sp|Q00546|TENR_CHICK Tenascin-R OS=Gallus gallus OX=9031 GN=TNR PE=1 SV=1 && PF00147:Fibrinogen beta and gamma chains, C-terminal globular domain	-1.89892	0.000920053	0.0429626	down
Cg21489	1827.89	1022.96	2653.35	614.125	806.097	522.262	1834.74	647.495	- && sp|Q0P467|RNKA_DANRE Ribonuclease kappa-A OS=Danio rerio OX=7955 GN=rnaseka PE=3 SV=1 && -	1.50265	0.000924025	0.0430407	up
novel.1733	0	0	0	13.5398	9.58499	18.8572	0	13.994	- && - && -	-6.16793	0.00094344	0.043836	down
novel.4207	3.57476	0	1.06947	1.93425	69.0119	36.0746	1.54808	35.6736	- && - && PF01607:Chitin binding Peritrophin-A domain	-4.58282	0.000949334	0.0440007	down
Cg09527	58.3878	30.7448	144.378	5.80276	16.2945	16.3975	77.8369	12.8316	- && sp|Q149N8|SHPRH_HUMAN E3 ubiquitin-protein ligase SHPRH OS=Homo sapiens OX=9606 GN=SHPRH PE=1 SV=2 && PF00176:SNF2 family N-terminal domain|PF00271:Helicase conserved C-terminal domain	2.59653	0.000955275	0.0441667	up
novel.2062	1.19159	0	0	57.0605	0	25.4162	0.397196	27.4922	- && - && -	-6.17905	0.000965205	0.0445159	down
Cg13899	2237.8	2798.71	2697.2	841.4	1187.58	1248.67	2577.9	1092.55	- && sp|P70705|ATP7A_RAT Copper-transporting ATPase 1 OS=Rattus norvegicus OX=10116 GN=Atp7a PE=1 SV=1 && PF00403:Heavy-metal-associated domain|PF00122:E1-E2 ATPase|PF00702:haloacid dehalogenase-like hydrolase	1.23845	0.000977338	0.044963	up
Cg17846	139.416	166.767	149.725	434.24	579.892	268.1	151.969	427.41	- && sp|Q8R508|FAT3_RAT Protocadherin Fat 3 OS=Rattus norvegicus OX=10116 GN=Fat3 PE=1 SV=1 && PF00028:Cadherin domain	-1.49094	0.000979701	0.044963	down
Cg25407	1815.98	1455.25	2778.48	862.677	853.064	667.38	2016.57	794.374	- && - && PF16516:Leucine zipper of domain CC2 of NEMO, NF-kappa-B essential modulator	1.34408	0.000983297	0.0450177	up
Cg18441	1962.54	2929.14	3220.17	983.567	803.222	1392.97	2703.95	1059.92	- && sp|Q90YI8|TAL1_TAKRU T-cell acute lymphocytic leukemia protein 1 OS=Takifugu rubripes OX=31033 GN=tal1 PE=2 SV=1 && PF00010:Helix-loop-helix DNA-binding domain	1.35101	0.000992493	0.0451585	up
Cg03984	21.4486	35.4031	22.4588	119.924	116.937	69.6896	26.4368	102.183	- && - && -	-1.94487	0.00099255	0.0451585	down
Cg08418	27.4065	62.4213	26.7367	294.006	54.6344	193.491	38.8548	180.711	- && sp|B3DLF3|LYRM2_XENTR LYR motif-containing protein 2 OS=Xenopus tropicalis OX=8364 GN=lyrm2 PE=3 SV=1 && -	-2.21316	0.000993608	0.0451585	down
Cg24383	552.897	257.138	418.162	145.069	140.899	153.317	409.399	146.428	- && sp|Q9NWZ3|IRAK4_HUMAN Interleukin-1 receptor-associated kinase 4 OS=Homo sapiens OX=9606 GN=IRAK4 PE=1 SV=1 && PF14786:Tube Death domain|PF00069:Protein kinase domain	1.4824	0.00100016	0.0453463	up
Cg18217	8.34111	9.31661	18.1809	165.379	14.3775	72.9691	11.9462	84.2417	- && sp|Q4KM95|LRC42_RAT Leucine-rich repeat-containing protein 42 OS=Rattus norvegicus OX=10116 GN=Lrrc42 PE=1 SV=1 && -	-2.8173	0.00101171	0.045759	down
Cg24560	2134.13	403.409	1096.2	74.4687	399.694	345.168	1211.25	273.11	- && sp|P52789|HXK2_HUMAN Hexokinase-2 OS=Homo sapiens OX=9606 GN=HK2 PE=1 SV=2 && PF00349:Hexokinase|PF03727:Hexokinase	2.14845	0.0010191	0.0458981	up
novel.2652	0	0	1.06947	68.666	3.83399	2.45963	0.356489	24.9865	- && - && -	-6.03954	0.00101968	0.0458981	down
Cg12607	284.789	494.712	658.792	2272.75	2812.24	462.411	479.431	1849.13	- && - && PF04505:Interferon-induced transmembrane protein	-1.94713	0.00103108	0.0462996	down
Cg07537	114.392	0.931661	8.55574	0	0	3.27951	41.2933	1.09317	- && - && PF00010:Helix-loop-helix DNA-binding domain	5.18108	0.00103594	0.0464065	up
Cg01092	249.042	552.475	483.399	195.36	129.397	81.9877	428.305	135.582	- && - && -	1.66115	0.00105228	0.047026	up
Cg27228	152.523	192.854	172.184	631.533	392.026	359.926	172.52	461.162	- && - && -	-1.41763	0.00106095	0.0473007	down
Cg29179	225.21	1049.98	52.4039	1484.54	2096.24	3584.5	442.532	2388.43	- && - && PF00080:Copper/zinc superoxide dismutase (SODC)	-2.43157	0.00107086	0.0476291	down
novel.7336	92.9438	184.469	147.586	432.305	324.931	418.957	141.666	392.065	- && - && -	-1.46675	0.00108168	0.0479965	down
Cg00247	160.864	115.526	121.919	16.4411	45.0494	45.0933	132.77	35.5279	- && sp|Q9Y289|SC5A6_HUMAN Sodium-dependent multivitamin transporter OS=Homo sapiens OX=9606 GN=SLC5A6 PE=1 SV=2 && PF00474:Sodium:solute symporter family	1.89897	0.00109109	0.0482993	up
Cg16208	140.607	156.519	28.8756	565.769	301.927	387.802	108.667	418.499	- && - && -	-1.94482	0.00109589	0.0483322	down
Cg21909	620.817	377.323	125.128	2485.51	758.172	1114.21	374.422	1452.63	- && - && PF10195:DNA-binding nuclear phosphoprotein p8	-1.95627	0.00109699	0.0483322	down
Cg14156	38.1308	225.462	71.6543	16.4411	19.17	28.6957	111.749	21.4356	- && - && PF00059:Lectin C-type domain	2.38201	0.00110844	0.0486286	up
Cg22233	142.99	39.1297	244.908	4.83563	28.755	37.7144	142.343	23.7683	- && sp|Q6UXB4|CLC4G_HUMAN C-type lectin domain family 4 member G OS=Homo sapiens OX=9606 GN=CLEC4G PE=1 SV=1 && PF00059:Lectin C-type domain	2.57764	0.00110891	0.0486286	up
Cg12928	41.7056	668.001	310.146	40.6193	105.435	36.8945	339.951	60.9829	- && sp|P10394|POL4_DROME Retrovirus-related Pol polyprotein from transposon 412 OS=Drosophila melanogaster OX=7227 GN=POL PE=4 SV=1 && PF17919:RNase H-like domain found in reverse transcriptase|PF00078:Reverse transcriptase (RNA-dependent DNA polymerase)|PF00665:Integrase core domain|PF07534:TLD|PF17921:Integrase zinc binding domain	2.48064	0.00111168	0.048636	up
Cg28951	1173.71	1167.37	1361.43	381.048	441.868	673.939	1234.17	498.952	- && sp|Q9U1M8|MYOI_DICDI Myosin-I heavy chain OS=Dictyostelium discoideum OX=44689 GN=myoI PE=1 SV=1 && PF00063:Myosin head (motor domain)|PF00373:FERM central domain|PF00784:MyTH4 domain	1.30615	0.00112157	0.0489545	up
Cg20532	4.76635	9.31661	0	62.8632	25.8795	48.3728	4.69432	45.7051	- && sp|Q91XQ5|CHSTF_MOUSE Carbohydrate sulfotransferase 15 OS=Mus musculus OX=10090 GN=Chst15 PE=2 SV=1 && PF00685:Sulfotransferase domain	-3.26662	0.00112701	0.0490773	down
novel.1754	675.63	497.507	403.189	191.491	240.583	178.733	525.442	203.602	- && Q96C23.1 RecName: Full=Aldose 1-epimerase; AltName: Full=Galactose mutarotase && PF01263:Aldose 1-epimerase	1.36777	0.00113797	0.0493667	up
novel.492	22809.4	6710.75	8663.76	3804.67	5436.6	2539.16	12728	3926.81	- && - && -	1.69657	0.00113893	0.0493667	up
Cg11509	41.7056	48.4463	51.3344	401.357	55.5929	172.174	47.1621	209.708	- && - && -	-2.15188	0.0011428	0.0494202	down
Cg15575	570.77	158.382	745.419	61.8961	165.82	152.497	491.524	126.738	- && sp|A0A1D3PCM3|SST_EMEND Serine O-succinyltransferase OS=Emericella nidulans OX=162425 GN=CysA PE=1 SV=1 && PF00561:alpha/beta hydrolase fold	1.95451	0.00114648	0.0494518	up
Cg27391	7.14952	26.0865	9.62521	184.721	21.087	80.348	14.2871	95.3854	- && - && PF13639:Ring finger domain	-2.7279	0.00114881	0.0494518	down
Cg17274	59.5794	22.3599	40.6398	8.70414	2.8755	4.91926	40.8597	5.49963	- && - && PF00019:Transforming growth factor beta like domain|PF00688:TGF-beta propeptide	2.89317	0.001153	0.0495183	up
Cg07283	0	3.72664	1.06947	59.9618	0.958499	52.4721	1.5987	37.7975	- && sp|Q24K15|ANGP4_BOVIN Angiopoietin-4 OS=Bos taurus OX=9913 GN=ANGPT4 PE=2 SV=1 && PF00147:Fibrinogen beta and gamma chains, C-terminal globular domain	-4.51225	0.00116779	0.0500386	down
Cg14012	3.57476	0	1.06947	25.1453	40.2569	13.9379	1.54808	26.4467	- && sp|Q09575|YRD6_CAEEL Uncharacterized protein K02A2.6 OS=Caenorhabditis elegans OX=6239 GN=K02A2.6 PE=4 SV=1 && PF17921:Integrase zinc binding domain|PF00665:Integrase core domain|PF00078:Reverse transcriptase (RNA-dependent DNA polymerase)	-4.15758	0.0011765	0.0502968	down
Cg30247	235.934	234.778	288.756	24.1782	20.1285	124.621	253.156	56.3093	- && sp|A6QP74|CALRL_BOVIN Calcitonin gene-related peptide type 1 receptor OS=Bos taurus OX=9913 GN=CALCRL PE=2 SV=2 && PF02793:Hormone receptor domain|PF00002:7 transmembrane receptor (Secretin family)	2.16406	0.00119016	0.0505434	up
Cg13221	4321.89	3434.1	6283.12	1839.47	2159.5	1824.23	4679.7	1941.07	- && - && PF12796:Ankyrin repeats (3 copies)	1.26956	0.00119042	0.0505434	up
Cg05691	3127.92	1784.13	3264.01	1338.5	810.89	1043.7	2725.35	1064.37	- && - && PF00668:Condensation domain	1.35637	0.00119268	0.0505434	up
Cg12902	1148.69	1049.98	1393.52	168.28	285.633	668.2	1197.4	374.038	- && sp|Q7Z6B7|SRGP1_HUMAN SLIT-ROBO Rho GTPase-activating protein 1 OS=Homo sapiens OX=9606 GN=SRGAP1 PE=1 SV=1 && PF00611:Fes/CIP4, and EFC/F-BAR homology domain|PF00018:SH3 domain|PF00620:RhoGAP domain	1.67786	0.00119307	0.0505434	up
Cg05765	120.35	172.357	83.4185	424.568	480.208	231.205	125.375	378.661	- && sp|Q9QYS2|GRM3_MOUSE Metabotropic glutamate receptor 3 OS=Mus musculus OX=10090 GN=Grm3 PE=1 SV=1 && PF01094:Receptor family ligand binding region|PF00003:7 transmembrane sweet-taste receptor of 3 GCPR	-1.59302	0.00120533	0.0509474	down
Cg10157	183.504	70.8062	160.42	27.0795	50.8004	32.7951	138.244	36.8917	- && sp|Q6DN90|IQEC1_HUMAN IQ motif and SEC7 domain-containing protein 1 OS=Homo sapiens OX=9606 GN=IQSEC1 PE=1 SV=1 && PF01369:Sec7 domain|PF16453:PH domain	1.90496	0.0012186	0.0513925	up
Cg05627	642.266	397.819	505.858	200.195	214.704	205.789	515.314	206.896	- && sp|Q7ZYJ0|TAO1B_XENLA Serine/threonine-protein kinase TAO1-B OS=Xenopus laevis OX=8355 GN=taok1-b PE=2 SV=1 && PF00069:Protein kinase domain|PF12474:Polo kinase kinase	1.31607	0.0012307	0.0517088	up
Cg13490	4388.62	4827.87	4786.94	1965.2	2298.48	2172.67	4667.81	2145.45	- && sp|Q14596|NBR1_HUMAN Next to BRCA1 gene 1 protein OS=Homo sapiens OX=9606 GN=NBR1 PE=1 SV=3 && PF00569:Zinc finger, ZZ type|PF00564:PB1 domain|PF16158:Ig-like domain from next to BRCA1 gene	1.12147	0.00123162	0.0517088	up
Cg05124	15.4906	24.2232	39.5703	168.28	98.7254	65.5902	26.428	110.865	- && - && PF00096:Zinc finger, C2H2 type	-2.06549	0.00123769	0.0518475	down
Cg22589	5.95794	0	6.4168	29.9809	47.9249	40.9939	4.12491	39.6332	- && - && PF00041:Fibronectin type III domain	-3.29131	0.0012441	0.0519014	down
Cg15176	47.6635	0.931661	129.406	0	0	0	59.3336	0	- && - && -	8.46513	0.00124452	0.0519014	up
novel.3473	0	6.52162	0	80.2715	24.921	13.118	2.17387	39.4368	- && - && -	-4.11986	0.00124983	0.0520068	down
Cg15520	443.27	408.067	413.884	144.102	133.231	216.448	421.741	164.594	- && sp|Q5T4S7|UBR4_HUMAN E3 ubiquitin-protein ligase UBR4 OS=Homo sapiens OX=9606 GN=UBR4 PE=1 SV=1 && PF13764:E3 ubiquitin-protein ligase UBR4|PF02207:Putative zinc finger in N-recognin (UBR box)	1.35634	0.00126078	0.0522754	up
Cg16965	324.112	380.118	83.4185	2059.98	403.528	840.374	262.549	1101.29	- && - && PF00538:linker histone H1 and H5 family	-2.06828	0.00126187	0.0522754	down
Cg28998	255	268.318	181.809	93.8113	74.7629	88.5468	235.042	85.707	- && - && -	1.45543	0.00126526	0.0523001	up
novel.2916	19.0654	40.9931	249.186	6.76988	25.8795	6.55902	103.081	13.0695	- && - && -	2.98336	0.00127109	0.0523909	up
Cg22376	1025.96	579.493	388.217	265.96	176.364	245.963	664.555	229.429	- && - && PF13637:Ankyrin repeats (many copies)	1.53386	0.00127305	0.0523909	up
Cg16585	193.037	358.689	296.242	16.4411	48.8834	130.36	282.656	65.2284	- && - && PF13895:Immunoglobulin domain	2.11252	0.00128609	0.0528114	up
Cg27084	11.9159	6.52162	17.1115	78.3372	51.7589	49.1926	11.8497	59.7629	- && sp|P04464|CALM_WHEAT Calmodulin OS=Triticum aestivum OX=4565 PE=1 SV=3 && PF13499:EF-hand domain pair	-2.34003	0.00130204	0.0532584	down
novel.7382	0	13.9749	38.5008	0	0	0	17.4919	0	- && - && -	6.70443	0.00130365	0.0532584	up
Cg16453	3.57476	3.72664	4.27787	24.1782	51.7589	22.9566	3.85976	32.9646	- && sp|P17538|CTRB1_HUMAN Chymotrypsinogen B OS=Homo sapiens OX=9606 GN=CTRB1 PE=2 SV=2 && PF00089:Trypsin	-3.09268	0.00130669	0.0532584	down
Cg14365	34.556	28.8815	24.5977	4.83563	0	2.45963	29.3451	2.43175	- && - && -	3.59373	0.00130835	0.0532584	up
Cg29483	542.172	515.208	1008.51	233.077	280.84	269.74	688.629	261.219	- && sp|Q00651|ITA4_MOUSE Integrin alpha-4 OS=Mus musculus OX=10090 GN=Itga4 PE=1 SV=1 && PF01839:FG-GAP repeat|PF08441:Integrin alpha	1.39835	0.00132586	0.053854	up
Cg14544	2218.74	2140.02	2673.67	472.925	1225.92	935.48	2344.14	878.108	- && - && -	1.41653	0.00133027	0.0539162	up
Cg21943	28.5981	76.3962	38.5008	201.162	179.239	121.342	47.8317	167.248	- && - && PF15478:Family of unknown function with LKAAEAR motif	-1.79983	0.00134601	0.0544365	down
Cg24553	430.163	415.521	279.131	123.792	185.949	87.7269	374.938	132.489	- && sp|P52590|NU107_RAT Nuclear pore complex protein Nup107 OS=Rattus norvegicus OX=10116 GN=Nup107 PE=1 SV=1 && PF04121:Nuclear pore protein 84 / 107	1.5018	0.00136088	0.0548431	up
novel.4726	0	0	1.06947	42.5536	1.917	17.2174	0.356489	20.5627	- && - && -	-5.75973	0.00136366	0.0548431	down
Cg04987	127.5	11.1799	9.62521	1.93425	0	7.3789	49.435	3.10438	- && - && PF02229:Transcriptional Coactivator p15 (PC4)	3.96618	0.00136485	0.0548431	up
Cg00165	63.1541	32.6081	165.767	1.93425	24.921	10.6584	87.1766	12.5045	- && sp|Q99M80|PTPRT_MOUSE Receptor-type tyrosine-protein phosphatase T OS=Mus musculus OX=10090 GN=Ptprt PE=1 SV=2 && PF00102:Protein-tyrosine phosphatase	2.80181	0.00140004	0.056029	up
Cg11175	45.2803	180.742	14.9725	0.967126	19.17	0.819877	80.3317	6.98566	- && sp|P09480|ACHA2_CHICK Neuronal acetylcholine receptor subunit alpha-2 OS=Gallus gallus OX=9031 GN=CHRNA2 PE=2 SV=1 && PF02932:Neurotransmitter-gated ion-channel transmembrane region|PF02931:Neurotransmitter-gated ion-channel ligand binding domain	3.53369	0.00140079	0.056029	up
Cg29553	3.57476	247.822	116.572	28.0467	2.8755	2.45963	122.656	11.1273	- && - && PF01734:Patatin-like phospholipase	3.46964	0.00140334	0.056029	up
Cg26089	3021.87	2561.13	2330.37	1160.55	162.945	867.43	2637.79	730.309	- && - && PF10324:Serpentine type 7TM GPCR chemoreceptor Srw	1.85268	0.00141203	0.0562558	up
Cg27534	245.467	193.785	228.866	29.9809	37.3814	114.783	222.706	60.7151	- && sp|Q8VHR5|P66B_MOUSE Transcriptional repressor p66-beta OS=Mus musculus OX=10090 GN=Gatad2b PE=1 SV=1 && PF16563:Coiled-coil and interaction region of P66A and P66B with MBD2	1.87074	0.00141914	0.0564191	up
Cg06403	42.8971	39.1297	49.1955	127.661	132.273	136.1	43.7408	132.011	- && - && PF14735:HAUS augmin-like complex subunit 4	-1.59443	0.00142271	0.0564413	down
Cg10606	258.574	190.059	203.199	699.232	417.905	528.821	217.277	548.653	- && sp|Q3ZCE0|LSM8_BOVIN U6 snRNA-associated Sm-like protein LSm8 OS=Bos taurus OX=9913 GN=LSM8 PE=3 SV=3 && -	-1.337	0.00142622	0.0564607	down
Cg12059	0	3.72664	0	31.9152	15.336	31.1553	1.24221	26.1355	- && sp|O07619|YHFT_BACSU Uncharacterized acyl--CoA ligase YhfT OS=Bacillus subtilis (strain 168) OX=224308 GN=yhfT PE=2 SV=1 && PF00501:AMP-binding enzyme	-4.31103	0.0014352	0.0566963	down
Cg30428	0	0	0	20.3097	18.2115	3.27951	0	13.9335	- && - && PF04199:Putative cyclase	-6.1584	0.00144013	0.0567716	down
Cg11736	1945.86	1622.95	2476.89	863.644	1003.55	723.952	2015.23	863.715	- && - && -	1.22239	0.00145023	0.0570496	up
Cg03812	3382.92	2022.64	1915.42	808.518	1218.25	919.902	2440.32	982.224	- && - && -	1.31286	0.00145337	0.057053	up
Cg29196	45.2803	7.45328	102.669	7.73701	3.83399	6.55902	51.8008	6.04334	- && sp|O14522|PTPRT_HUMAN Receptor-type tyrosine-protein phosphatase T OS=Homo sapiens OX=9606 GN=PTPRT PE=1 SV=6 && PF00102:Protein-tyrosine phosphatase	3.09698	0.00145856	0.0571372	up
Cg00248	8.34111	10.2483	5.34734	29.0138	134.19	17.2174	7.9789	60.1403	- && - && -	-2.90953	0.00147161	0.0575278	down
Cg13127	614.859	294.405	373.244	1516.45	1066.81	852.672	427.503	1145.31	- && - && -	-1.42237	0.00149764	0.0583808	down
Cg28750	1450.16	1018.31	1587.09	597.684	490.751	637.045	1351.85	575.16	- && - && -	1.23265	0.00150182	0.0583808	up
Cg21662	6323.75	4659.23	8999.57	1403.3	3553.15	2297.3	6660.85	2417.92	- && sp|Q3UPW2|ELF3_MOUSE ETS-related transcription factor Elf-3 OS=Mus musculus OX=10090 GN=Elf3 PE=1 SV=1 && PF02198:Sterile alpha motif (SAM)/Pointed domain|PF00178:Ets-domain	1.46193	0.00150278	0.0583808	up
Cg07805	742.359	173.289	511.205	184.721	126.522	112.323	475.618	141.189	- && - && -	1.75193	0.00151765	0.0588364	up
novel.6200	0	0	0	25.1453	9.58499	5.73914	0	13.4898	- && - && -	-6.11209	0.00152727	0.059046	down
Cg15177	3.57476	5.58996	6.4168	83.1729	25.8795	17.2174	5.19384	42.0899	- && - && -	-3.01084	0.00152999	0.059046	down
Cg25085	64.3457	149.997	81.2795	4.83563	29.7135	0	98.5409	11.5164	- && sp|O19010|CRIS3_HORSE Cysteine-rich secretory protein 3 OS=Equus caballus OX=9796 GN=CRISP3 PE=1 SV=1 && PF00188:Cysteine-rich secretory protein family	3.10567	0.00153252	0.059046	up
Cg23559	72.6868	72.6695	60.9596	456.484	79.5554	250.063	68.772	262.034	- && sp|Q9BWT1|CDCA7_HUMAN Cell division cycle-associated protein 7 OS=Homo sapiens OX=9606 GN=CDCA7 PE=1 SV=1 && PF10497:Zinc-finger domain of monoamine-oxidase A repressor R1	-1.92975	0.0015462	0.0594408	down
Cg08055	0	0	0	18.3754	15.336	5.73914	0	13.1502	- && - && -	-6.07535	0.00154911	0.0594408	down
Cg21142	159.673	284.156	228.866	15.474	49.8419	100.845	224.232	55.387	- && sp|Q761V0|SC6A5_MOUSE Sodium- and chloride-dependent glycine transporter 2 OS=Mus musculus OX=10090 GN=Slc6a5 PE=1 SV=1 && PF00209:Sodium:neurotransmitter symporter family	2.01441	0.00155237	0.0594442	up
novel.2266	60.771	91.3027	12.8336	11.6055	4.79249	7.3789	54.9691	7.92564	- && - && PF00643:B-box zinc finger	2.7967	0.00156035	0.0596277	up
Cg26344	1042.64	955.884	1409.56	219.538	438.992	583.753	1136.03	414.094	- && sp|Q91XE9|CR3L3_MOUSE Cyclic AMP-responsive element-binding protein 3-like protein 3 OS=Mus musculus OX=10090 GN=Creb3l3 PE=1 SV=1 && PF00170:bZIP transcription factor	1.45547	0.00158167	0.0602208	up
Cg17447	10.7243	14.9066	39.5703	18.3754	60.3854	393.541	21.7337	157.434	- && sp|Q8NFT2|STEA2_HUMAN Metalloreductase STEAP2 OS=Homo sapiens OX=9606 GN=STEAP2 PE=1 SV=3 && PF03807:NADP oxidoreductase coenzyme F420-dependent|PF01794:Ferric reductase like transmembrane component	-2.85726	0.00158386	0.0602208	down
novel.3803	8.34111	0	3.2084	25.1453	110.227	9.83853	3.84984	48.4037	- && - && -	-3.68351	0.00158552	0.0602208	down
novel.5569	3.57476	7.45328	0	98.6469	13.419	22.1367	3.67602	44.7342	- && - && -	-3.58602	0.00159467	0.0604208	down
Cg15845	2038.81	1399.35	1363.57	448.747	296.176	914.983	1600.58	553.302	- && - && PF00001:7 transmembrane receptor (rhodopsin family)	1.53189	0.00159724	0.0604208	up
Cg12109	165.631	215.214	541.15	1974.87	357.52	1238.01	307.332	1190.14	- && sp|A7SBN6|ZGPAT_NEMVE Zinc finger CCCH-type with G patch domain-containing protein OS=Nematostella vectensis OX=45351 GN=v1g244155 PE=3 SV=1 && PF01585:G-patch domain|PF00692:dUTPase	-1.95317	0.00160413	0.0605592	down
Cg08987	426.588	1106.81	1081.23	258.223	227.164	411.578	871.544	298.988	- && - && PF00001:7 transmembrane receptor (rhodopsin family)	1.54331	0.00162077	0.0610029	up
novel.4421	0	2.79498	0	29.9809	36.423	7.3789	0.931661	24.5943	- && - && -	-4.62836	0.0016224	0.0610029	down
novel.5077	10.7243	16.7699	21.3893	95.7455	50.8004	65.5902	16.2945	70.712	- && - && -	-2.11351	0.00163907	0.0614986	down
Cg06499	1780.23	151.861	1747.51	61.8961	484.042	113.143	1226.53	219.694	- && - && PF00811:Ependymin	2.48116	0.0016434	0.0614986	up
Cg05739	53.6214	43.788	23.5283	276.598	54.6344	173.814	40.3126	168.349	- && sp|Q2HJF3|ORC6_BOVIN Origin recognition complex subunit 6 OS=Bos taurus OX=9913 GN=ORC6 PE=2 SV=1 && PF05460:Origin recognition complex subunit 6 (ORC6)	-2.06318	0.00164712	0.0614986	down
Cg10326	3972.75	3239.38	5499.2	1584.15	1909.33	1993.94	4237.11	1829.14	- && sp|Q5RBP9|MPEG1_PONAB Macrophage-expressed gene 1 protein OS=Pongo abelii OX=9601 GN=MPEG1 PE=2 SV=1 && PF01823:MAC/Perforin domain	1.21185	0.001653	0.0614986	up
Cg11916	173.972	207.76	342.23	83.1729	61.3439	101.665	241.321	82.0605	- && - && PF12796:Ankyrin repeats (3 copies)|PF00754:F5/8 type C domain	1.55528	0.00165493	0.0614986	up
Cg24802	46.4719	136.954	158.281	631.533	217.579	352.547	113.902	400.553	- && sp|B2RW38|CFA58_MOUSE Cilia- and flagella-associated protein 58 OS=Mus musculus OX=10090 GN=Cfap58 PE=2 SV=1 && -	-1.81235	0.00166127	0.0614986	down
novel.5962	25.0233	10.2483	45.9871	2.90138	1.917	2.45963	27.0862	2.426	- && - && -	3.47892	0.00166211	0.0614986	up
novel.4029	1.19159	0	0	32.8823	1.917	22.9566	0.397196	19.252	- && - && -	-5.66564	0.00166313	0.0614986	down
Cg17081	336.028	345.646	604.249	16.4411	166.779	120.522	428.641	101.247	- && sp|O35600|ABCA4_MOUSE Retinal-specific phospholipid-transporting ATPase ABCA4 OS=Mus musculus OX=10090 GN=Abca4 PE=2 SV=1 && PF00005:ABC transporter|PF12698:ABC-2 family transporter protein	2.08138	0.00166514	0.0614986	up
Cg07088	511.191	472.352	468.427	122.825	131.314	274.659	483.99	176.266	- && - && PF02174:PTB domain (IRS-1 type)	1.45576	0.00167945	0.0618064	up
Cg29431	829.345	1449.66	626.708	122.825	232.915	508.324	968.572	288.021	- && sp|Q0IP28|LAC25_ORYSJ Laccase-25 OS=Oryza sativa subsp. japonica OX=39947 GN=LAC25 PE=3 SV=1 && PF00394:Multicopper oxidase|PF07731:Multicopper oxidase|PF07732:Multicopper oxidase	1.74905	0.00168008	0.0618064	up
Cg22902	51.2383	44.7197	47.0566	13.5398	0.958499	5.73914	47.6715	6.7458	- && - && -	2.82401	0.00169132	0.0619711	up
Cg23390	1325.05	2122.32	2890.77	660.547	631.651	1105.19	2112.71	799.131	- && sp|Q14185|DOCK1_HUMAN Dedicator of cytokinesis protein 1 OS=Homo sapiens OX=9606 GN=DOCK1 PE=1 SV=2 && PF06920:Dock homology region 2|PF16172:DOCK N-terminus|PF14429:C2 domain in Dock180 and Zizimin proteins	1.40244	0.00169202	0.0619711	up
Cg14245	635.116	194.717	231.005	18.3754	136.107	86.0871	353.613	80.1898	- && sp|Q9BXS9|S26A6_HUMAN Solute carrier family 26 member 6 OS=Homo sapiens OX=9606 GN=SLC26A6 PE=1 SV=1 && PF00916:Sulfate permease family|PF01740:STAS domain	2.13972	0.00169451	0.0619711	up
Cg23216	2682.26	964.269	1961.4	673.12	825.267	567.355	1869.31	688.581	- && sp|Q99K82|SMOX_MOUSE Spermine oxidase OS=Mus musculus OX=10090 GN=Smox PE=1 SV=1 && PF01593:Flavin containing amine oxidoreductase	1.44072	0.00169915	0.0619711	up
Cg29404	85.7943	43.788	43.8482	138.299	184.99	215.628	57.8102	179.639	- && sp|P16444|DPEP1_HUMAN Dipeptidase 1 OS=Homo sapiens OX=9606 GN=DPEP1 PE=1 SV=3 && PF01244:Membrane dipeptidase (Peptidase family M19)	-1.63991	0.0017011	0.0619711	down
Cg22644	50.0467	572.971	24.5977	50.2906	14.3775	25.4162	215.872	30.0281	- && sp|A4QP81|FRRS1_DANRE Putative ferric-chelate reductase 1 OS=Danio rerio OX=7955 GN=frrs1 PE=2 SV=1 && PF03188:Eukaryotic cytochrome b561	2.84773	0.00171054	0.0620951	up
Cg24891	165.631	274.84	283.409	59.9618	46.9664	120.522	241.293	75.8167	- && sp|Q9BZ29|DOCK9_HUMAN Dedicator of cytokinesis protein 9 OS=Homo sapiens OX=9606 GN=DOCK9 PE=1 SV=2 && PF14429:C2 domain in Dock180 and Zizimin proteins|PF11878:Domain of unknown function (DUF3398)|PF00169:PH domain|PF06920:Dock homology region 2	1.66822	0.00171243	0.0620951	up
Cg26274	4772.31	3204.91	5160.18	1526.13	1589.19	2385.84	4379.13	1833.72	- && sp|Q6ZSZ5|ARHGI_HUMAN Rho guanine nucleotide exchange factor 18 OS=Homo sapiens OX=9606 GN=ARHGEF18 PE=1 SV=4 && PF17838:PH domain|PF00621:RhoGEF domain|PF00130:Phorbol esters/diacylglycerol binding domain (C1 domain)	1.25573	0.00171642	0.0620951	up
novel.2305	3.57476	34.4714	22.4588	0.967126	0.958499	0	20.1683	0.641875	- && - && -	5.02293	0.00171777	0.0620951	up
Cg06208	30.9813	23.2915	26.7367	87.0414	109.269	81.1679	27.0032	92.4927	- && sp|P80003|PA2A2_HELSU Acidic phospholipase A2 PA4 OS=Heloderma suspectum OX=8554 PE=1 SV=2 && PF05826:Phospholipase A2	-1.77848	0.00176369	0.063424	down
Cg18878	1530	591.604	602.11	413.93	90.0989	258.261	907.904	254.097	- && sp|Q9BZP6|CHIA_HUMAN Acidic mammalian chitinase OS=Homo sapiens OX=9606 GN=CHIA PE=1 SV=1 && PF01607:Chitin binding Peritrophin-A domain|PF00704:Glycosyl hydrolases family 18	1.8369	0.0017645	0.063424	up
Cg16153	36830.8	34871.1	14251.7	6178.97	14689	8894.85	28651.2	9920.94	- && sp|P24733|MYS_ARGIR Myosin heavy chain, striated muscle OS=Argopecten irradians OX=31199 PE=1 SV=1 && PF00063:Myosin head (motor domain)|PF02736:Myosin N-terminal SH3-like domain|PF01576:Myosin tail	1.53005	0.00176469	0.063424	up
Cg08668	243.084	395.024	511.205	123.792	153.36	152.497	383.104	143.216	- && sp|Q9R0I6|XIAP_RAT E3 ubiquitin-protein ligase XIAP OS=Rattus norvegicus OX=10116 GN=Xiap PE=2 SV=1 && PF13920:Zinc finger, C3HC4 type (RING finger)	1.41973	0.0017682	0.0634283	up
Cg11219	29.7897	74.5328	112.294	0	5.75099	19.6771	72.2055	8.47602	- && - && PF01146:Caveolin	3.07692	0.00177463	0.0635371	up
novel.5754	913.947	85.7128	1220.26	215.669	44.0909	176.274	739.974	145.345	- && - && -	2.34755	0.00178321	0.0635946	up
Cg04374	11.9159	0	38.5008	0	0	0	16.8056	0	- && - && -	6.64421	0.00178629	0.0635946	up
Cg22162	490.934	353.099	1228.82	261.124	181.156	227.926	690.95	223.402	- && sp|Q8INF0|GCY8E_DROME Soluble guanylate cyclase 88E OS=Drosophila melanogaster OX=7227 GN=Gyc88E PE=1 SV=4 && PF07701:Heme NO binding associated|PF00211:Adenylate and Guanylate cyclase catalytic domain|PF07700:Haem-NO-binding	1.62881	0.00178748	0.0635946	up
Cg17049	486.168	108.073	151.864	17.4083	81.4724	0.819877	248.702	33.2335	- && - && -	2.90609	0.00178982	0.0635946	up
Cg08281	41.7056	56.8313	66.307	15.474	10.5435	9.83853	54.9479	11.952	- && sp|A0A0R4IBK5|R213A_DANRE E3 ubiquitin-protein ligase rnf213-alpha OS=Danio rerio OX=7955 GN=rnf213a PE=3 SV=1 && -	2.20454	0.00180964	0.064177	up
Cg11363	259.766	468.625	524.039	56.0933	113.103	210.708	417.477	126.635	- && sp|Q9V4A7|PLXB_DROME Plexin-B OS=Drosophila melanogaster OX=7227 GN=PlexB PE=1 SV=2 && PF08337:Plexin cytoplasmic RasGAP domain|PF01833:IPT/TIG domain|PF01403:Sema domain	1.71969	0.00181519	0.0642523	up
Cg30086	38.1308	66.1479	28.8756	1.93425	5.75099	11.4783	44.3848	6.38784	- && sp|Q9DGD1|MGT4C_CHICK Alpha-1,6-mannosyl-glycoprotein 4-beta-N-acetylglucosaminyltransferase OS=Gallus gallus OX=9031 GN=MGAT4C PE=1 SV=1 && PF04666:N-Acetylglucosaminyltransferase-IV (GnT-IV) conserved region	2.78466	0.00181923	0.0642739	up
Cg27248	16.6822	11.1799	65.2375	3.86851	0.958499	3.27951	31.0332	2.70217	- && sp|P09480|ACHA2_CHICK Neuronal acetylcholine receptor subunit alpha-2 OS=Gallus gallus OX=9031 GN=CHRNA2 PE=2 SV=1 && PF02931:Neurotransmitter-gated ion-channel ligand binding domain|PF02932:Neurotransmitter-gated ion-channel transmembrane region	3.51656	0.00182649	0.0644087	up
Cg19080	0	0	0	24.1782	1.917	15.5777	0	13.8909	- && sp|Q5EA66|ANGL7_BOVIN Angiopoietin-related protein 7 OS=Bos taurus OX=9913 GN=ANGPTL7 PE=2 SV=1 && PF00147:Fibrinogen beta and gamma chains, C-terminal globular domain	-6.15638	0.00185241	0.065163	down
Cg03368	237.126	736.944	686.598	50.2906	159.111	238.584	553.556	149.329	- && sp|Q9Y490|TLN1_HUMAN Talin-1 OS=Homo sapiens OX=9606 GN=TLN1 PE=1 SV=3 && PF00373:FERM central domain|PF16511:N-terminal or F0 domain of Talin-head FERM|PF01608:I/LWEQ domain|PF09141:Talin, middle domain	1.88955	0.00185484	0.065163	up
Cg15099	26.2149	36.3348	31.0146	111.22	127.48	76.2486	31.1881	104.983	- && - && PF15057:Domain of unknown function (DUF4537)	-1.74756	0.00186418	0.0651692	down
Cg01567	0	0	0	23.211	17.253	1.63975	0	14.0346	- && - && -	-6.16867	0.00186452	0.0651692	down
Cg08439	7.14952	0	3.2084	29.9809	64.2194	17.2174	3.45264	37.1393	- && - && PF00583:Acetyltransferase (GNAT) family	-3.46334	0.00186546	0.0651692	down
Cg05068	85.7943	133.227	89.8353	254.354	394.901	212.348	102.952	287.201	- && sp|Q567I9|CB5D1_DANRE Cytochrome b5 domain-containing protein 1 OS=Danio rerio OX=7955 GN=cyb5d1 PE=2 SV=1 && PF00173:Cytochrome b5-like Heme/Steroid binding domain	-1.47801	0.0018834	0.0656733	down
Cg19546	1870.79	1357.43	1944.29	857.841	511.838	806.759	1724.17	725.48	- && - && -	1.24872	0.00189141	0.0658302	up
Cg25052	237.126	169.562	312.284	81.2386	92.9744	90.1865	239.658	88.1332	- && sp|Q9Z1Z1|E2AK3_RAT Eukaryotic translation initiation factor 2-alpha kinase 3 OS=Rattus norvegicus OX=10116 GN=Eif2ak3 PE=1 SV=1 && PF00069:Protein kinase domain	1.44257	0.0018959	0.0658641	up
Cg08908	165.631	93.1661	67.3764	485.497	191.7	350.907	108.724	342.702	- && - && -	-1.65804	0.00190618	0.0660987	down
Cg14701	44.0887	109.004	71.6543	253.387	238.666	180.373	74.9158	224.142	- && sp|P90666|TXND3_HELCR Thioredoxin domain-containing protein 3 homolog OS=Heliocidaris crassispina OX=1043166 GN=NME8 PE=1 SV=1 && PF00085:Thioredoxin|PF00334:Nucleoside diphosphate kinase	-1.57696	0.00193265	0.0668927	down
Cg09046	0	0	0	13.5398	17.253	6.55902	0	12.4506	- && sp|O95907|MOT3_HUMAN Monocarboxylate transporter 3 OS=Homo sapiens OX=9606 GN=SLC16A8 PE=2 SV=1 && PF07690:Major Facilitator Superfamily	-5.99678	0.00196788	0.0679861	down
Cg28555	182.313	137.886	209.616	50.2906	71.8874	65.5902	176.605	62.5894	- && sp|Q86X52|CHSS1_HUMAN Chondroitin sulfate synthase 1 OS=Homo sapiens OX=9606 GN=CHSY1 PE=1 SV=3 && PF05679:Chondroitin N-acetylgalactosaminyltransferase	1.49559	0.00199066	0.0685482	up
Cg01112	48.8551	188.195	449.176	67.6988	33.5475	53.292	228.742	51.5128	- && - && -	2.1511	0.00199244	0.0685482	up
Cg16166	154.906	326.081	58.8207	8.70414	61.3439	38.5342	179.936	36.1941	- && sp|P24733|MYS_ARGIR Myosin heavy chain, striated muscle OS=Argopecten irradians OX=31199 PE=1 SV=1 && PF00063:Myosin head (motor domain)|PF02736:Myosin N-terminal SH3-like domain	2.31403	0.00200042	0.0685482	up
Cg09543	8.34111	0	2.13893	72.5345	1.917	77.0685	3.49335	50.5066	- && sp|Q94HV7|SPL1P_ARATH E3 ubiquitin-protein ligase SPL1 OS=Arabidopsis thaliana OX=3702 GN=SPL1 PE=2 SV=1 && PF13837:Myb/SANT-like DNA-binding domain	-3.88832	0.00200701	0.0685482	down
Cg08022	4.76635	12.1116	28.8756	115.088	16.2945	162.336	15.2512	97.9061	- && - && PF13960:Domain of unknown function (DUF4218)|PF02992:Transposase family tnp2	-2.68038	0.00200782	0.0685482	down
novel.213	108.434	21.4282	39.5703	0	13.419	4.91926	56.4776	6.11275	- && Q9DBI0.4 RecName: Full=Transmembrane protease serine 6; AltName: Full=Matriptase-2 && PF00089:Trypsin	3.20717	0.00200965	0.0685482	up
Cg13067	33.3644	173.289	387.147	15.474	41.2154	58.2113	197.934	38.3003	- && sp|P55866|CASP3_XENLA Caspase-3 OS=Xenopus laevis OX=8355 GN=casp3 PE=2 SV=1 && PF00656:Caspase domain	2.36784	0.0020139	0.0685482	up
Cg19539	1619.37	1295.01	664.139	117.989	543.469	407.479	1192.84	356.312	- && sp|Q9BQS2|SYT15_HUMAN Synaptotagmin-15 OS=Homo sapiens OX=9606 GN=SYT15 PE=1 SV=3 && PF00168:C2 domain	1.74298	0.00201614	0.0685482	up
Cg11056	10.7243	57.763	42.7787	29.0138	557.846	112.323	37.0886	233.061	- && - && -	-2.64751	0.00201709	0.0685482	down
Cg05663	797.172	414.589	347.577	87.0414	265.504	142.659	519.779	165.068	- && sp|A0A0G2K344|PK3CA_RAT Phosphatidylinositol 4,5-bisphosphate 3-kinase catalytic subunit alpha isoform OS=Rattus norvegicus OX=10116 GN=Pik3ca PE=1 SV=1 && PF00792:Phosphoinositide 3-kinase C2|PF00613:Phosphoinositide 3-kinase family, accessory domain (PIK domain)|PF02192:PI3-kinase family, p85-binding domain|PF00454:Phosphatidylinositol 3- and 4-kinase|PF00794:PI3-kinase family, ras-binding…	1.65462	0.00204094	0.0692328	up
Cg25464	720.91	884.146	1081.23	433.273	267.421	416.498	895.429	372.397	- && sp|Q7Z3E2|CC186_HUMAN Coiled-coil domain-containing protein 186 OS=Homo sapiens OX=9606 GN=CCDC186 PE=1 SV=2 && -	1.26568	0.0020501	0.0693478	up
novel.4723	0	0.931661	0	31.9152	0	36.0746	0.310554	22.6633	- && - && -	-5.90161	0.00205173	0.0693478	down
Cg17635	0	14.9066	11.7641	88.9756	37.3814	64.7703	8.89024	63.7091	- && sp|Q5HZL1|ERI2_XENLA ERI1 exoribonuclease 2 OS=Xenopus laevis OX=8355 GN=eri2 PE=2 SV=1 && PF00929:Exonuclease|PF06839:GRF zinc finger	-2.82386	0.00207532	0.0700186	down
Cg20107	112.009	239.437	185.018	75.4359	14.3775	48.3728	178.821	46.062	- && - && -	1.95768	0.00209122	0.0702769	up
novel.6787	0	0	1.06947	18.3754	23.9625	6.55902	0.356489	16.299	- && - && -	-5.42307	0.00209185	0.0702769	down
Cg26931	4787.8	5929.09	8817.76	1578.35	1650.53	3873.92	6511.55	2367.6	- && sp|P21941|MATN1_HUMAN Cartilage matrix protein OS=Homo sapiens OX=9606 GN=MATN1 PE=1 SV=1 && PF00092:von Willebrand factor type A domain	1.45947	0.00209579	0.0702769	up
Cg30128	0	0	0	21.2768	9.58499	6.55902	0	12.4736	- && - && -	-5.99936	0.00209798	0.0702769	down
novel.3755	1278.57	3220.75	807.448	443.911	276.048	841.194	1768.92	520.384	- && - && -	1.76505	0.00213723	0.0713854	up
Cg25029	160.864	299.995	441.69	1069.64	705.455	702.635	300.85	825.911	- && sp|P19217|ST1E1_BOVIN Sulfotransferase 1E1 OS=Bos taurus OX=9913 GN=SULT1E1 PE=1 SV=1 && PF00685:Sulfotransferase domain	-1.45631	0.0021387	0.0713854	down
Cg14945	13.1075	9.31661	9.62521	51.2577	80.5139	29.5156	10.6831	53.7624	- && - && PF02931:Neurotransmitter-gated ion-channel ligand binding domain	-2.33423	0.0021544	0.0717813	down
Cg10545	175.163	123.911	229.935	295.941	1072.56	358.286	176.337	575.596	- && sp|Q3SZJ4|PTGR1_BOVIN Prostaglandin reductase 1 OS=Bos taurus OX=9913 GN=PTGR1 PE=2 SV=1 && PF00107:Zinc-binding dehydrogenase|PF16884:N-terminal domain of oxidoreductase	-1.70703	0.00216058	0.0718424	down
Cg22695	28.5981	28.8815	23.5283	61.8961	202.243	64.7703	27.0026	109.637	- && sp|Q2TBS4|PIFO_BOVIN Protein pitchfork OS=Bos taurus OX=9913 GN=PIFO PE=2 SV=1 && -	-2.02063	0.00216462	0.0718424	down
Cg17019	5636.21	3052.12	3447.96	1432.31	1074.48	2235.81	4045.43	1580.87	- && sp|Q92038|ACOD_CYPCA Acyl-CoA desaturase OS=Cyprinus carpio OX=7962 PE=2 SV=2 && PF00487:Fatty acid desaturase	1.35538	0.00216774	0.0718424	up
Cg17986	341.986	218.94	524.039	116.055	126.522	152.497	361.655	131.691	- && sp|Q9XT77|SC5A6_RABIT Sodium-dependent multivitamin transporter OS=Oryctolagus cuniculus OX=9986 GN=SLC5A6 PE=2 SV=1 && PF00474:Sodium:solute symporter family	1.45655	0.00217167	0.0718453	up
Cg27651	1165.37	1474.82	469.496	155.707	497.461	318.932	1036.56	324.033	- && - && -	1.67767	0.00219474	0.0724807	up
Cg30154	7.14952	3.72664	63.0986	0.967126	0.958499	1.63975	24.6582	1.18846	- && - && PF01683:EB module	4.36221	0.00221401	0.0729053	up
Cg03678	73.8784	65.2162	57.7512	19.3425	18.2115	13.118	65.6153	16.8907	- && - && -	1.96032	0.00221539	0.0729053	up
Cg01035	91.7522	61.4896	95.1826	27.0795	23.9625	18.8572	82.8081	23.2997	- && - && -	1.83044	0.00222093	0.0729595	up
Cg01179	138.224	106.209	236.352	44.4878	40.2569	66.4101	160.262	50.3849	- && sp|Q28C98|MESH1_XENTR Guanosine-3',5'-bis(diphosphate) 3'-pyrophosphohydrolase MESH1 OS=Xenopus tropicalis OX=8364 GN=hddc3 PE=2 SV=1 && PF13328:HD domain	1.66697	0.00222919	0.0731026	up
Cg00928	0	28.8815	17.1115	0	0	0	15.331	0	- && - && PF16489:GPCR-Autoproteolysis INducing (GAIN) domain	6.5163	0.00223796	0.0732619	up
Cg05309	191.846	165.836	243.839	58.0276	45.0494	100.025	200.507	67.7007	- && sp|Q8IYT8|ULK2_HUMAN Serine/threonine-protein kinase ULK2 OS=Homo sapiens OX=9606 GN=ULK2 PE=1 SV=3 && PF12063:Domain of unknown function (DUF3543)|PF00069:Protein kinase domain	1.56368	0.00224417	0.0733246	up
Cg19378	51.2383	100.619	40.6398	111.22	457.204	163.156	64.1658	243.86	- && sp|Q9CQ66|DYT2B_MOUSE Dynein light chain Tctex-type protein 2B OS=Mus musculus OX=10090 GN=Dynlt2b PE=1 SV=1 && PF03645:Tctex-1 family	-1.92324	0.00224914	0.0733246	down
Cg01516	10.7243	34.4714	38.5008	0	0.958499	4.91926	27.8989	1.95925	- && - && PF00643:B-box zinc finger	3.79428	0.00225451	0.0733246	up
Cg26753	5051.14	3274.79	4461.82	1401.37	2154.71	2036.58	4262.58	1864.22	- && sp|Q04861|NFKB1_CHICK Nuclear factor NF-kappa-B p105 subunit OS=Gallus gallus OX=9031 GN=NFKB1 PE=2 SV=2 && PF12796:Ankyrin repeats (3 copies)|PF00023:Ankyrin repeat	1.19307	0.00225554	0.0733246	up
Cg18924	26.2149	46.583	25.6672	129.595	112.144	87.7269	32.8217	109.822	- && sp|Q8N0N9|ODH_HALDH Opine dehydrogenase OS=Haliotis discus hannai OX=42344 GN=tadh PE=2 SV=1 && PF02317:NAD/NADP octopine/nopaline dehydrogenase, alpha-helical domain	-1.73694	0.00226399	0.0734719	down
Cg18571	20.257	38.1981	9.62521	89.9427	61.3439	140.199	22.6934	97.1619	- && sp|F1P963|8ODP_CANLF 7,8-dihydro-8-oxoguanine triphosphatase OS=Canis lupus familiaris OX=9615 GN=NUDT1 PE=1 SV=2 && PF00293:NUDIX domain	-2.09269	0.00227299	0.0736363	down
novel.5202	4.76635	1.86332	0	30.948	26.838	21.3168	2.20989	26.3676	- && - && -	-3.60456	0.00227821	0.0736778	down
Cg27287	25.0233	73.6012	16.042	162.477	254.961	75.4287	38.2222	164.289	- && - && PF04505:Interferon-induced transmembrane protein	-2.09703	0.00229337	0.0740403	down
Cg09203	69.1121	23.2915	7.48627	72.5345	260.712	154.137	33.2966	162.461	- && sp|P82197|PDXK_SHEEP Pyridoxal kinase OS=Ovis aries OX=9940 GN=PDXK PE=1 SV=1 && PF08543:Phosphomethylpyrimidine kinase	-2.29256	0.00230933	0.0741395	down
Cg17021	65.5373	77.3278	63.0986	264.993	177.322	139.379	68.6546	193.898	- && sp|Q13257|MD2L1_HUMAN Mitotic spindle assembly checkpoint protein MAD2A OS=Homo sapiens OX=9606 GN=MAD2L1 PE=1 SV=1 && PF02301:HORMA domain	-1.49635	0.00231127	0.0741395	down
Cg10591	110.818	272.045	36.3619	634.435	531.967	382.883	139.741	516.428	- && sp|Q6DHB5|LHPL3_DANRE LHFPL tetraspan subfamily member 3 protein OS=Danio rerio OX=7955 GN=lhfpl3 PE=2 SV=1 && PF10242:Lipoma HMGIC fusion partner-like protein	-1.88375	0.00231206	0.0741395	down
Cg06807	246.659	433.222	304.798	43.5207	83.3894	173.814	328.226	100.241	- && sp|B7ZRM8|EVI1B_XENLA MDS1 and EVI1 complex locus protein EVI1-B OS=Xenopus laevis OX=8355 GN=mecom-b PE=2 SV=1 && PF00096:Zinc finger, C2H2 type	1.70947	0.00231228	0.0741395	up
Cg14427	238.317	242.232	341.16	63.8303	138.982	93.466	273.903	98.7596	- && - && PF04970:Lecithin retinol acyltransferase	1.4718	0.00233017	0.0745418	up
Cg14517	2.38317	5.58996	7.48627	61.8961	19.17	31.9752	5.15314	37.6804	- && sp|Q6NSJ0|MYORG_HUMAN Myogenesis-regulating glycosidase OS=Homo sapiens OX=9606 GN=MYORG PE=1 SV=2 && PF01055:Glycosyl hydrolases family 31	-2.86008	0.00233279	0.0745418	down
novel.4075	0	0	0	16.4411	2.8755	18.8572	0	12.7246	- && - && -	-6.03097	0.0023454	0.074817	down
Cg09165	336.028	351.236	617.083	158.609	197.451	155.777	434.782	170.612	- && - && PF00001:7 transmembrane receptor (rhodopsin family)	1.34981	0.00237214	0.0755412	up
Cg07187	277.64	56.8313	103.738	23.211	23.9625	54.9318	146.07	34.0351	- && sp|Q18161|YBPT_CAEEL UPF0046 protein C25E10.12 OS=Caenorhabditis elegans OX=6239 GN=C25E10.12 PE=3 SV=1 && PF00149:Calcineurin-like phosphoesterase	2.09613	0.00239148	0.0760281	up
Cg13913	129.883	174.221	241.7	1074.48	177.322	645.243	181.934	632.348	- && - && PF08661:Replication factor A protein 3	-1.79699	0.00239848	0.0761211	down
Cg05285	73.8784	67.0796	188.226	339.461	407.362	253.342	109.728	333.388	- && sp|P41924|RYL1_YARLI Ras-like GTP-binding protein RYL1 OS=Yarrowia lipolytica (strain CLIB 122 / E 150) OX=284591 GN=RYL1 PE=3 SV=1 && PF00071:Ras family	-1.60333	0.00243206	0.0770564	down
Cg04481	21.4486	23.2915	29.9451	0	3.83399	2.45963	24.8951	2.09788	- && - && -	3.5628	0.00245076	0.0775176	up
Cg01018	613.667	1049.98	811.726	385.883	281.799	379.603	825.125	349.095	- && sp|Q6NWZ9|CDO1_DANRE Cysteine dioxygenase type 1 OS=Danio rerio OX=7955 GN=cdo1 PE=2 SV=1 && PF05995:Cysteine dioxygenase type I	1.2412	0.002457	0.0775235	up
Cg13932	1177.29	1709.6	1463.03	441.977	596.186	806.759	1449.97	614.974	- && sp|Q9VF87|CYFIP_DROME Cytoplasmic FMR1-interacting protein OS=Drosophila melanogaster OX=7227 GN=Sra-1 PE=1 SV=1 && PF05994:Cytoplasmic Fragile-X interacting family|PF07159:Protein of unknown function (DUF1394)	1.23726	0.00245922	0.0775235	up
Cg10150	22.6402	25.1548	13.9031	0	2.8755	0	20.566	0.958499	- && - && -	4.45815	0.00247672	0.0778688	up
Cg05982	26.2149	10.2483	31.0146	163.444	56.5514	69.6896	22.4926	96.5618	- && sp|O43825|B3GT2_HUMAN Beta-1,3-galactosyltransferase 2 OS=Homo sapiens OX=9606 GN=B3GALT2 PE=1 SV=1 && PF01762:Galactosyltransferase	-2.10694	0.00247849	0.0778688	down
Cg24504	63.1541	78.2595	24.5977	7.73701	17.253	4.91926	55.3371	9.96975	- && - && -	2.47983	0.00248868	0.0780579	up
Cg18686	283.598	236.642	221.38	1225.35	333.558	608.349	247.206	722.419	- && sp|O93388|STMN3_CHICK Stathmin-3 OS=Gallus gallus OX=9031 GN=STMN3 PE=2 SV=1 && PF00836:Stathmin family	-1.54726	0.00249504	0.0781266	down
Cg04261	381.308	802.16	389.286	94.7784	206.077	236.125	524.251	178.993	- && sp|Q9Z0J4|NOS1_MOUSE Nitric oxide synthase, brain OS=Mus musculus OX=10090 GN=Nos1 PE=1 SV=1 && PF00258:Flavodoxin|PF00595:PDZ domain|PF00667:FAD binding domain|PF00175:Oxidoreductase NAD-binding domain|PF02898:Nitric oxide synthase, oxygenase domain	1.55019	0.00251008	0.0784662	up
novel.5758	658.948	498.438	457.732	278.532	217.579	183.653	538.373	226.588	- && - && -	1.24874	0.0025492	0.0795564	up
Cg03086	0	0	0	40.6193	0	9.83853	0	16.8193	- && - && -	-6.43129	0.00256708	0.0798738	down
Cg28905	3026.63	2060.83	3895	1172.16	1331.35	1420.85	2994.16	1308.12	- && sp|Q7M4L6|SHF_HUMAN SH2 domain-containing adapter protein F OS=Homo sapiens OX=9606 GN=SHF PE=1 SV=2 && PF00017:SH2 domain	1.19455	0.0025679	0.0798738	up
Cg15119	38.1308	51.2413	77.0017	8.70414	2.8755	18.0373	55.4579	9.87231	- && - && PF16026:Mitochondria-eating protein	2.47973	0.00258392	0.0802385	up
Cg14671	12399.7	10532.4	12353.4	5593.86	6193.82	5291.49	11761.8	5693.06	- && sp|P28648|CD63_RAT CD63 antigen OS=Rattus norvegicus OX=10116 GN=Cd63 PE=1 SV=2 && PF00335:Tetraspanin family	1.04684	0.00258956	0.0802806	up
Cg21261	13.1075	9.31661	9.62521	20.3097	94.8914	55.7517	10.6831	56.9842	- && sp|Q9HBL8|NMRL1_HUMAN NmrA-like family domain-containing protein 1 OS=Homo sapiens OX=9606 GN=NMRAL1 PE=1 SV=1 && PF05368:NmrA-like family	-2.4193	0.00259711	0.0803815	down
Cg00959	26.2149	54.968	160.42	15.474	17.253	16.3975	80.5343	16.3748	- && sp|O14522|PTPRT_HUMAN Receptor-type tyrosine-protein phosphatase T OS=Homo sapiens OX=9606 GN=PTPRT PE=1 SV=6 && PF00102:Protein-tyrosine phosphatase	2.29865	0.00260913	0.0806205	up
Cg03390	5.95794	1.86332	29.9451	0	0	0	12.5888	0	- && sp|Q9Y4G6|TLN2_HUMAN Talin-2 OS=Homo sapiens OX=9606 GN=TLN2 PE=1 SV=4 && PF01608:I/LWEQ domain	6.22773	0.00261609	0.080679	up
Cg26285	14.299	67.0796	79.1406	0	12.4605	0	53.5064	4.15349	- && - && -	3.70139	0.00261964	0.080679	up
Cg02154	71.4952	55.8996	262.02	17.4083	49.8419	14.7578	129.805	27.336	- && sp|Q15262|PTPRK_HUMAN Receptor-type tyrosine-protein phosphatase kappa OS=Homo sapiens OX=9606 GN=PTPRK PE=1 SV=2 && PF00102:Protein-tyrosine phosphatase	2.24983	0.00262452	0.0806965	up
Cg08415	46.4719	24.2232	39.5703	166.346	78.5969	121.342	36.7551	122.095	- && sp|Q8TDW5|SYTL5_HUMAN Synaptotagmin-like protein 5 OS=Homo sapiens OX=9606 GN=SYTL5 PE=1 SV=1 && PF02318:FYVE-type zinc finger|PF00168:C2 domain	-1.73608	0.00263268	0.0808147	down
novel.4160	23.8317	5.58996	5.34734	0	0	0	11.5897	0	- && - && -	6.10527	0.00264152	0.0809533	up
Cg03585	1496.63	2813.61	2854.41	795.945	578.933	1353.62	2388.22	909.499	- && sp|Q96NN9|AIFM3_HUMAN Apoptosis-inducing factor 3 OS=Homo sapiens OX=9606 GN=AIFM3 PE=1 SV=1 && PF14759:Reductase C-terminal|PF00355:Rieske [2Fe-2S] domain|PF07992:Pyridine nucleotide-disulphide oxidoreductase	1.39265	0.00265086	0.0810973	up
Cg16684	82.2195	68.9429	71.6543	15.474	29.7135	13.118	74.2722	19.4352	- && - && PF07974:EGF-like domain	1.93706	0.00265488	0.0810973	up
Cg19603	357.476	491.917	788.197	137.332	198.409	270.56	545.863	202.1	- && - && PF00641:Zn-finger in Ran binding protein and others	1.43291	0.00266393	0.0812412	up
Cg08922	94.1354	177.947	198.921	597.684	346.977	337.789	157.001	427.483	- && sp|Q8BTW8|CK5P1_MOUSE Mitochondrial tRNA methylthiotransferase CDK5RAP1 OS=Mus musculus OX=10090 GN=Cdk5rap1 PE=1 SV=2 && PF00919:Uncharacterized protein family UPF0004|PF01938:TRAM domain|PF04055:Radical SAM superfamily|PF01408:Oxidoreductase family, NAD-binding Rossmann fold	-1.44366	0.00268581	0.0817481	down
Cg28696	147.757	136.954	119.78	534.821	227.164	320.572	134.83	360.852	- && - && PF15387:Domain of unknown function (DUF4611)	-1.4203	0.00268928	0.0817481	down
novel.7164	51.2383	95.961	25.6672	4.83563	13.419	13.9379	57.6222	10.7308	- && P21613.1 RecName: Full=Kinesin heavy chain && -	2.42275	0.00270681	0.0821477	up
novel.490	349.135	738.807	920.811	4436.21	739.003	1813.57	669.584	2329.59	- && - && -	-1.79851	0.00272268	0.0824192	down
novel.5702	148.948	282.293	134.753	529.018	776.384	310.734	188.665	538.712	- && - && -	-1.51211	0.00272456	0.0824192	down
Cg26697	47.6635	206.829	113.364	140.233	954.665	405.839	122.619	500.246	- && - && PF00619:Caspase recruitment domain	-2.02641	0.00274085	0.0827782	down
Cg07067	63.1541	0	18.1809	0	1.917	0	27.1117	0.638999	- && - && -	5.43757	0.00274711	0.0828335	up
Cg23330	691.121	794.706	1319.72	407.16	393.943	385.342	935.183	395.482	- && sp|D2KQB0|HHEX_PATMI Hematopoietically-expressed homeobox protein HHEX homolog OS=Patiria miniata OX=46514 GN=hhex PE=2 SV=1 && PF00046:Homeodomain	1.24172	0.00276707	0.0833013	up
Cg28258	85.7943	110.868	225.658	837.531	175.405	452.572	140.773	488.503	- && sp|P09482|ACHA4_CHICK Neuronal acetylcholine receptor subunit alpha-4 OS=Gallus gallus OX=9031 GN=CHRNA4 PE=1 SV=1 && PF02931:Neurotransmitter-gated ion-channel ligand binding domain|PF02932:Neurotransmitter-gated ion-channel transmembrane region|PF03980:Nnf1	-1.7947	0.00278168	0.0835047	down
Cg17178	0	0	1.06947	29.0138	3.83399	15.5777	0.356489	16.1418	- && sp|P35408|PE2R4_HUMAN Prostaglandin E2 receptor EP4 subtype OS=Homo sapiens OX=9606 GN=PTGER4 PE=1 SV=1 && PF00001:7 transmembrane receptor (rhodopsin family)	-5.41081	0.00278275	0.0835047	down
Cg13551	36.9392	43.788	56.6818	302.711	56.5514	157.416	45.803	172.226	- && sp|Q59LN9|CENPA_CANAL Histone H3-like centromeric protein CSE4 OS=Candida albicans (strain SC5314 / ATCC MYA-2876) OX=237561 GN=CSE4 PE=3 SV=1 && PF00125:Core histone H2A/H2B/H3/H4	-1.91001	0.00279483	0.0837332	down
Cg16350	5.95794	21.4282	4.27787	80.2715	53.6759	40.9939	10.5547	58.3138	- && sp|Q05901|ACHB3_HUMAN Neuronal acetylcholine receptor subunit beta-3 OS=Homo sapiens OX=9606 GN=CHRNB3 PE=2 SV=2 && PF02932:Neurotransmitter-gated ion-channel transmembrane region|PF02931:Neurotransmitter-gated ion-channel ligand binding domain	-2.44837	0.00283291	0.0847384	down
Cg08085	11.9159	0	0	45.4549	69.0119	24.5963	3.97196	46.3544	- && - && PF12012:Domain of unknown function (DUF3504)	-3.58498	0.00285198	0.0851729	down
Cg00807	0	0	0	29.0138	19.17	0	0	16.0613	- && - && PF12012:Domain of unknown function (DUF3504)	-6.36373	0.00285841	0.0852288	down
novel.2725	0	69.8745	45.9871	1.93425	0	4.09939	38.6205	2.01121	- && - && PF00050:Kazal-type serine protease inhibitor domain	4.24503	0.00286861	0.0853972	up
Cg17973	1426.33	2067.35	1625.59	562.868	506.087	1034.69	1706.43	701.213	- && sp|P18163|ACSL1_RAT Long-chain-fatty-acid--CoA ligase 1 OS=Rattus norvegicus OX=10116 GN=Acsl1 PE=1 SV=1 && PF00501:AMP-binding enzyme	1.28281	0.00288698	0.0855662	up
novel.5926	0	0	0	26.1124	0.958499	13.118	0	13.3963	- && - && -	-6.10368	0.00288797	0.0855662	down
novel.4183	0	0	0	42.5536	0	7.3789	0	16.6442	- && - && -	-6.41594	0.002888	0.0855662	down
Cg07638	16.6822	44.7197	72.7238	260.157	135.148	105.764	44.7086	167.023	- && sp|Q2YDF6|RT35_BOVIN 28S ribosomal protein S35, mitochondrial OS=Bos taurus OX=9913 GN=MRPS35 PE=1 SV=1 && PF10213:Mitochondrial ribosomal subunit protein	-1.89816	0.00289594	0.0856657	down
Cg16372	35.7476	39.1297	34.223	162.477	78.5969	104.944	36.3668	115.339	- && sp|O89033|CDC6_MOUSE Cell division control protein 6 homolog OS=Mus musculus OX=10090 GN=Cdc6 PE=1 SV=2 && PF17872:AAA lid domain|PF00004:ATPase family associated with various cellular activities (AAA)|PF09079:CDC6, C terminal winged helix domain	-1.66417	0.00291093	0.0858411	down
Cg05733	3.57476	0	0	27.0795	34.506	8.19877	1.19159	23.2614	- && sp|P31582|RAF2A_ARATH Ras-related protein RABF2a OS=Arabidopsis thaliana OX=3702 GN=RABF2A PE=1 SV=1 && PF00071:Ras family	-4.36757	0.00291914	0.0858411	down
Cg12884	3378.15	2136.3	2609.5	760.161	1037.1	1580.72	2707.98	1125.99	- && - && -	1.26575	0.00292748	0.0858411	up
novel.6632	1.19159	0	10.6947	54.1591	33.5475	31.1553	3.96209	39.6206	- && - && -	-3.3285	0.00292946	0.0858411	down
Cg18920	22.6402	76.3962	27.8062	163.444	120.771	157.416	42.2808	147.211	- && sp|Q69Z69|ESCO1_MOUSE N-acetyltransferase ESCO1 OS=Mus musculus OX=10090 GN=Esco1 PE=2 SV=2 && PF13880:ESCO1/2 acetyl-transferase|PF13878:zinc-finger of acetyl-transferase ESCO	-1.7929	0.00293018	0.0858411	down
Cg10943	97.7102	138.817	60.9596	26.1124	38.3399	9.83853	99.1624	24.7636	- && - && -	2.00728	0.00293376	0.0858411	up
Cg04968	17.8738	36.3348	7.48627	96.7126	76.6799	84.4474	20.5649	85.9466	- && sp|Q761V0|SC6A5_MOUSE Sodium- and chloride-dependent glycine transporter 2 OS=Mus musculus OX=10090 GN=Slc6a5 PE=1 SV=1 && PF00209:Sodium:neurotransmitter symporter family	-2.05536	0.00293643	0.0858411	down
Cg24199	365.817	550.611	349.716	879.118	1171.29	861.691	422.048	970.698	- && sp|Q8BTM8|FLNA_MOUSE Filamin-A OS=Mus musculus OX=10090 GN=Flna PE=1 SV=5 && PF00307:Calponin homology (CH) domain|PF00630:Filamin/ABP280 repeat	-1.20099	0.00293976	0.0858411	down
Cg18258	784.064	576.698	675.903	230.176	292.342	363.206	678.889	295.241	- && sp|Q76MZ1|CYH1_CHLAE Cytohesin-1 OS=Chlorocebus aethiops OX=9534 GN=CYTH1 PE=2 SV=1 && PF00169:PH domain|PF01369:Sec7 domain	1.20057	0.00294312	0.0858411	up
Cg03438	3593.83	3096.84	3131.4	1621.87	1670.66	1484.8	3274.02	1592.44	- && sp|O77633|ADA10_PIG Disintegrin and metalloproteinase domain-containing protein 10 OS=Sus scrofa OX=9823 GN=ADAM10 PE=2 SV=2 && PF13574:Metallo-peptidase family M12B Reprolysin-like|PF00200:Disintegrin|PF01562:Reprolysin family propeptide	1.03982	0.00295687	0.0861014	up
Cg28549	0	0	0	31.9152	0	15.5777	0	15.8309	- && - && -	-6.34464	0.00296124	0.0861014	down
Cg20140	25.0233	54.0363	53.4734	3.86851	2.8755	13.9379	44.1777	6.89397	- && sp|P22366|MYD88_MOUSE Myeloid differentiation primary response protein MyD88 OS=Mus musculus OX=10090 GN=Myd88 PE=1 SV=3 && PF13676:TIR domain	2.66574	0.0029864	0.0866983	up
Cg07133	471.869	280.43	283.409	108.318	184.032	61.4908	345.236	117.947	- && - && -	1.55029	0.00299964	0.0868585	up
Cg02745	0	0	0	0	33.5475	13.9379	0	15.8285	- && - && PF09612:Bacterial protein of unknown function (HtrL_YibB)	-6.34445	0.00301638	0.0868585	down
Cg23460	20.257	33.5398	6.4168	159.576	46.9664	76.2486	20.0712	94.2636	- && sp|P24470|CP2CN_RAT Cytochrome P450 2C23 OS=Rattus norvegicus OX=10116 GN=Cyp2c23 PE=1 SV=2 && PF00067:Cytochrome P450	-2.22598	0.00301822	0.0868585	down
Cg00048	33.3644	39.1297	14.9725	49.3234	216.621	95.9256	29.1556	120.623	- && - && -	-2.04699	0.00301948	0.0868585	down
Cg03989	113.201	151.861	242.769	393.62	477.332	410.759	169.277	427.237	- && sp|A4QMS7|CE049_HUMAN Uncharacterized protein C5orf49 OS=Homo sapiens OX=9606 GN=C5orf49 PE=1 SV=1 && PF15074:Domain of unknown function (DUF4541)	-1.33512	0.00302334	0.0868585	down
Cg29542	119.159	415.521	204.268	34.8165	82.4309	97.5654	246.316	71.6043	- && - && -	1.7822	0.00302888	0.0868585	up
Cg24862	22.6402	4.6583	6.4168	0	0	0	11.2384	0	- && sp|P00437|PCXB_PSEPU Protocatechuate 3,4-dioxygenase beta chain OS=Pseudomonas putida OX=303 GN=pcaH PE=1 SV=3 && PF00775:Dioxygenase	6.06073	0.00303081	0.0868585	up
novel.5654	0	0	6.4168	40.6193	36.423	14.7578	2.13893	30.6	- && - && -	-3.84152	0.00303466	0.0868585	down
Cg18711	25.0233	13.0432	36.3619	59.9618	214.704	54.1119	24.8095	109.592	- && sp|Q7JQ32|GC76C_DROME Receptor-type guanylate cyclase Gyc76C OS=Drosophila melanogaster OX=7227 GN=Gyc76C PE=1 SV=1 && PF01094:Receptor family ligand binding region|PF00211:Adenylate and Guanylate cyclase catalytic domain|PF07714:Protein tyrosine and serine/threonine kinase	-2.14569	0.00303698	0.0868585	down
Cg15001	3250.65	3966.08	3197.71	1247.59	1377.36	2074.29	3471.48	1566.42	- && - && PF01030:Receptor L domain|PF00757:Furin-like cysteine rich region	1.14799	0.00303831	0.0868585	up
novel.3726	82.2195	12.1116	32.084	388.785	46.0079	191.031	42.1384	208.608	- && - && -	-2.31295	0.00304438	0.0868995	down
Cg16110	59.5794	79.1911	84.4879	282.401	155.277	174.634	74.4195	204.104	- && sp|O95671|ASML_HUMAN Probable bifunctional dTTP/UTP pyrophosphatase/methyltransferase protein OS=Homo sapiens OX=9606 GN=ASMTL PE=1 SV=3 && PF02545:Maf-like protein	-1.45403	0.00305531	0.0869811	down
Cg14973	649.415	841.289	1017.06	237.913	204.16	506.684	835.923	316.252	- && sp|Q5ZJY3|GARL3_CHICK GTPase-activating Rap/Ran-GAP domain-like protein 3 OS=Gallus gallus OX=9031 GN=GARNL3 PE=2 SV=1 && PF02145:Rap/ran-GAP|PF00780:CNH domain	1.40159	0.00305653	0.0869811	up
Cg24145	135.841	147.202	141.17	313.349	467.747	262.361	141.404	347.819	- && sp|Q9ULX7|CAH14_HUMAN Carbonic anhydrase 14 OS=Homo sapiens OX=9606 GN=CA14 PE=1 SV=1 && PF00194:Eukaryotic-type carbonic anhydrase	-1.29792	0.00306495	0.0870682	down
Cg10178	253.808	331.671	587.138	87.0414	165.82	166.435	390.872	139.766	- && - && -	1.48328	0.00306889	0.0870682	up
Cg05167	386.074	333.534	161.49	965.192	623.983	680.498	293.699	756.558	- && sp|Q26627|SUREJ_STRPU Sperm receptor for egg jelly OS=Strongylocentrotus purpuratus OX=7668 GN=REJ PE=1 SV=1 && PF01549:ShK domain-like|PF00059:Lectin C-type domain	-1.36525	0.00307416	0.0870856	down
Cg12120	0	0	0	6.76988	5.75099	22.9566	0	11.8258	- && sp|P97355|SPSY_MOUSE Spermine synthase OS=Mus musculus OX=10090 GN=Sms PE=1 SV=1 && PF17284:Spermidine synthase tetramerisation domain|PF01564:Spermine/spermidine synthase domain	-5.92681	0.00307995	0.0871179	down
Cg04220	550.513	436.017	1135.77	184.721	363.271	209.889	707.435	252.627	- && - && -	1.48571	0.00309851	0.0872812	up
Cg08643	648.224	1010.85	621.361	167.313	306.72	404.2	760.145	292.744	- && sp|P23514|COPB_RAT Coatomer subunit beta OS=Rattus norvegicus OX=10116 GN=Copb1 PE=1 SV=1 && PF01602:Adaptin N terminal region|PF14806:Coatomer beta subunit appendage platform|PF07718:Coatomer beta C-terminal region	1.3763	0.00310022	0.0872812	up
Cg14964	175.163	346.578	352.924	49.3234	63.2609	159.876	291.555	90.8201	- && sp|Q96RU3|FNBP1_HUMAN Formin-binding protein 1 OS=Homo sapiens OX=9606 GN=FNBP1 PE=1 SV=2 && PF00611:Fes/CIP4, and EFC/F-BAR homology domain	1.68077	0.00310335	0.0872812	up
Cg23386	61.9625	73.6012	38.5008	116.055	219.496	177.094	58.0215	170.882	- && - && PF14113:Type VI secretion system (T6SS), amidase effector protein 4	-1.55728	0.00310437	0.0872812	down
novel.6163	203.761	847.811	967.868	198.261	171.571	271.379	673.147	213.737	- && Q86UF1.1 RecName: Full=Tetraspanin-33; Short=Tspan-33; AltName: Full=Penumbra; Short=hPen; AltName: Full=Proerythroblast new membrane && PF00335:Tetraspanin family	1.65509	0.00311204	0.0873563	up
Cg01090	21.4486	74.5328	136.892	18.3754	20.1285	7.3789	77.6244	15.2943	- && - && -	2.34958	0.00311637	0.0873563	up
Cg07191	241.892	47.5147	56.6818	3.86851	39.2984	18.0373	115.363	20.4014	- && sp|P18106|FER_DROME Tyrosine-protein kinase Fer OS=Drosophila melanogaster OX=7227 GN=FER PE=1 SV=3 && PF00017:SH2 domain|PF07714:Protein tyrosine and serine/threonine kinase|PF00643:B-box zinc finger	2.49804	0.00313219	0.0875626	up
Cg16285	172.78	352.168	311.215	38.6851	98.7254	130.36	278.721	89.257	- && sp|P70704|AT8A1_MOUSE Phospholipid-transporting ATPase IA OS=Mus musculus OX=10090 GN=Atp8a1 PE=1 SV=2 && PF13246:Cation transport ATPase (P-type)|PF16209:Phospholipid-translocating ATPase N-terminal|PF16212:Phospholipid-translocating P-type ATPase C-terminal	1.64179	0.00313366	0.0875626	up
Cg18283	145.374	153.724	133.683	29.9809	40.2569	72.1492	144.26	47.4624	- && sp|Q9VKJ9|C2D1_DROME Coiled-coil and C2 domain-containing protein 1-like OS=Drosophila melanogaster OX=7227 GN=l(2)gd1 PE=1 SV=1 && PF00168:C2 domain	1.60044	0.00313776	0.0875626	up
novel.4888	3.57476	6.52162	10.6947	92.8441	6.70949	55.7517	6.93035	51.7684	- && - && -	-2.89665	0.00315674	0.0879613	down
Cg07448	153.715	35.4031	26.7367	4.83563	1.917	22.9566	71.9515	9.90306	- && sp|Q8N118|CP4X1_HUMAN Cytochrome P450 4X1 OS=Homo sapiens OX=9606 GN=CYP4X1 PE=1 SV=1 && PF00067:Cytochrome P450	2.84614	0.00318071	0.0884726	up
Cg09762	54.813	123.911	54.5428	276.598	226.206	177.913	77.7556	226.906	- && sp|Q8N394|TMTC2_HUMAN Protein O-mannosyl-transferase TMTC2 OS=Homo sapiens OX=9606 GN=TMTC2 PE=1 SV=1 && PF08409:Domain of unknown function (DUF1736)|PF13181:Tetratricopeptide repeat|PF00515:Tetratricopeptide repeat|PF13424:Tetratricopeptide repeat	-1.54111	0.00319023	0.0884726	down
Cg11666	0	0	0	16.4411	17.253	2.45963	0	12.0513	- && - && -	-5.94892	0.00319795	0.0884726	down
Cg02056	1.19159	0.931661	2.13893	4.83563	17.253	45.0933	1.42073	22.394	- && - && -	-3.98806	0.00319912	0.0884726	down
Cg17201	1241.63	653.094	813.865	490.333	150.484	322.212	902.864	321.01	- && sp|O14901|KLF11_HUMAN Krueppel-like factor 11 OS=Homo sapiens OX=9606 GN=KLF11 PE=1 SV=2 && -	1.49168	0.00320258	0.0884726	up
Cg18026	71.4952	109.004	52.4039	183.754	310.554	172.994	77.6345	222.434	- && sp|Q8WWF8|CAPSL_HUMAN Calcyphosin-like protein OS=Homo sapiens OX=9606 GN=CAPSL PE=2 SV=4 && PF13499:EF-hand domain pair	-1.51619	0.00320367	0.0884726	down
Cg09628	28.5981	2.79498	4.27787	0	0	0	11.8903	0	- && - && -	6.14117	0.00320816	0.0884726	up
Cg24468	0	6.52162	0	67.6988	5.75099	32.7951	2.17387	35.415	- && sp|Q28811|PHR_POTTR Deoxyribodipyrimidine photo-lyase OS=Potorous tridactylus OX=9310 GN=PHR PE=2 SV=1 && PF00875:DNA photolyase	-3.97079	0.00321551	0.0885446	down
Cg16566	85.7943	3.72664	6.4168	0	0	4.09939	31.9792	1.36646	- && - && -	4.49606	0.00322641	0.0887144	up
Cg08230	0	49.378	1.06947	0	0	0	16.8158	0	- && - && -	6.65046	0.0032437	0.08889	up
Cg20120	873.434	64.2846	132.614	65.7646	110.227	44.2734	356.777	73.4218	- && - && -	2.28064	0.00324571	0.08889	up
Cg26130	56.0046	0.931661	145.448	5.80276	11.502	0.819877	67.4613	6.04154	- && - && -	3.48914	0.00324704	0.08889	up
Cg12424	1375.09	2396.23	1800.98	436.174	891.404	924.822	1857.44	750.8	- && sp|P11881|ITPR1_MOUSE Inositol 1,4,5-trisphosphate receptor type 1 OS=Mus musculus OX=10090 GN=Itpr1 PE=1 SV=2 && PF01365:RIH domain|PF08454:RyR and IP3R Homology associated|PF08709:Inositol 1,4,5-trisphosphate/ryanodine receptor|PF02815:MIR domain|PF00520:Ion transport protein	1.30678	0.00327312	0.0894551	up
Cg30426	0	0	0	0	33.5475	13.118	0	15.5552	- && - && -	-6.31926	0.00327723	0.0894551	down
Cg21013	5.95794	1.86332	1.06947	21.2768	64.2194	8.19877	2.96358	31.2317	- && sp|Q3U2S8|HVCN1_MOUSE Voltage-gated hydrogen channel 1 OS=Mus musculus OX=10090 GN=Hvcn1 PE=1 SV=2 && -	-3.42066	0.00329495	0.0898077	down
Cg09694	3291.16	1509.29	3182.73	1068.67	1109.94	1198.66	2661.06	1125.76	- && sp|Q14432|PDE3A_HUMAN cGMP-inhibited 3',5'-cyclic phosphodiesterase A OS=Homo sapiens OX=9606 GN=PDE3A PE=1 SV=3 && PF00233:3'5'-cyclic nucleotide phosphodiesterase	1.24095	0.00330577	0.0899346	up
Cg12638	119.159	54.0363	73.7932	254.354	300.01	153.317	82.3294	235.894	- && - && PF00582:Universal stress protein family	-1.52114	0.00330921	0.0899346	down
Cg22177	15.4906	55.8996	39.5703	149.905	115.02	113.963	36.9869	126.296	- && sp|Q9IA95|SFRP3_CHICK Secreted frizzled-related protein 3 OS=Gallus gallus OX=9031 GN=FRZB PE=2 SV=1 && PF01392:Fz domain|PF01759:UNC-6/NTR/C345C module	-1.76476	0.00333839	0.090596	down
Cg13457	219.252	974.517	436.343	357.837	4840.42	1898.84	543.371	2365.7	- && sp|P11833|TBB_PARLI Tubulin beta chain OS=Paracentrotus lividus OX=7656 PE=2 SV=1 && PF00091:Tubulin/FtsZ family, GTPase domain|PF03953:Tubulin C-terminal domain	-2.12182	0.0033485	0.090739	down
Cg25075	40.514	3.72664	14.9725	0.967126	0	1.63975	19.7377	0.86896	- && sp|A1BQQ5|MR30_CONMR Cysteine-rich venom protein Mr30 OS=Conus marmoreus OX=42752 PE=1 SV=1 && PF00188:Cysteine-rich secretory protein family	4.46948	0.00335886	0.0908881	up
novel.901	0	1.86332	0	59.9618	0	20.4969	0.621107	26.8196	- && - && -	-5.34172	0.00338514	0.0914671	down
Cg14480	0	0.931661	0	21.2768	9.58499	12.2982	0.310554	14.3866	- && sp|Q02053|UBA1_MOUSE Ubiquitin-like modifier-activating enzyme 1 OS=Mus musculus OX=10090 GN=Uba1 PE=1 SV=1 && PF10585:Ubiquitin-activating enzyme active site|PF00899:ThiF family	-5.24438	0.00340258	0.0916838	down
Cg16016	9.5327	13.9749	26.7367	60.929	105.435	46.733	16.7481	71.0323	- && sp|Q09225|NRF6_CAEEL Nose resistant to fluoxetine protein 6 OS=Caenorhabditis elegans OX=6239 GN=nrf-6 PE=1 SV=3 && PF01757:Acyltransferase family	-2.08147	0.00340295	0.0916838	down
novel.1581	0	0	0	6.76988	9.58499	17.2174	0	11.1908	- && - && -	-5.8461	0.00342386	0.0921147	down
Cg10281	11.9159	53.1047	124.058	14.5069	6.70949	10.6584	63.0262	10.6249	- && sp|A7T1N0|TMP2L_NEMVE Transient receptor potential cation channel subfamily M member-like 2 OS=Nematostella vectensis OX=45351 GN=TRPM2 PE=1 SV=1 && PF18139:SLOG in TRPM	2.56982	0.00344304	0.0924978	up
Cg09950	585.069	145.339	699.432	75.4359	226.206	109.044	476.613	136.895	- && - && -	1.7996	0.00349913	0.0938696	up
Cg30691	2443.95	1678.85	1898.3	988.403	747.629	1042.88	2007.03	926.305	- && sp|Q05976|RB18A_LYMST Ras-related protein Rab-18A OS=Lymnaea stagnalis OX=6523 GN=RAB18A PE=2 SV=1 && PF00071:Ras family	1.11531	0.00350413	0.0938696	up
Cg23334	60.771	148.134	73.7932	30.948	19.17	29.5156	94.2327	26.5445	- && sp|P29144|TPP2_HUMAN Tripeptidyl-peptidase 2 OS=Homo sapiens OX=9606 GN=TPP2 PE=1 SV=4 && PF00082:Subtilase family|PF12580:Tripeptidyl peptidase II|PF12583:Tripeptidyl peptidase II N terminal	1.82923	0.00352409	0.0942222	up
Cg22450	20.257	17.7016	12.8336	138.299	44.0909	40.9939	16.9307	74.4613	- && - && PF15111:TMEM101 protein family	-2.13678	0.00352907	0.0942222	down
Cg28127	138.224	31.6765	94.1131	17.4083	22.0455	25.4162	88.0046	21.6233	- && - && -	2.02076	0.00353239	0.0942222	up
Cg21046	8.34111	34.4714	22.4588	83.1729	113.103	63.9504	21.7571	86.742	- && sp|A9ZPC9|HMEN_LYMST Homeobox protein engrailed OS=Lymnaea stagnalis OX=6523 GN=EN PE=2 SV=1 && PF00046:Homeodomain|PF10525:Engrailed homeobox C-terminal signature domain	-1.98495	0.00354812	0.0945071	down
novel.5400	19.0654	9.31661	40.6398	3.86851	0	0.819877	23.0073	1.56279	- && - && -	3.89456	0.00356303	0.0947695	up
Cg06901	7.14952	1.86332	2.13893	30.948	27.7965	27.056	3.71726	28.6002	- && sp|A3KPP4|S2535_DANRE Solute carrier family 25 member 35 OS=Danio rerio OX=7955 GN=slc25a35 PE=2 SV=1 && PF00153:Mitochondrial carrier protein	-2.97065	0.00358285	0.0951615	down
Cg27215	151.332	181.674	130.475	739.852	187.866	432.075	154.493	453.264	- && sp|Q3B7G7|SR1IP_DANRE Protein SREK1IP1 OS=Danio rerio OX=7955 GN=srek1ip1 PE=2 SV=1 && PF13917:Zinc knuckle	-1.55234	0.00359272	0.0952886	down
Cg08608	0	12.1116	139.031	0.967126	2.8755	5.73914	50.3808	3.19392	- && - && PF14704:Dermatopontin	3.9677	0.00360399	0.0953365	up
Cg27201	1754.02	1704.01	2132.52	654.745	434.2	1162.59	1863.51	750.51	- && sp|Q2KJ93|CDC42_BOVIN Cell division control protein 42 homolog OS=Bos taurus OX=9913 GN=CDC42 PE=1 SV=1 && PF00071:Ras family|PF02822:Antistasin family	1.31174	0.00360471	0.0953365	up
novel.4147	2883.64	624.213	1674.79	8960.43	2435.55	5508.76	1727.55	5634.91	- && - && -	-1.70586	0.00364028	0.0961069	down
Cg05157	1699.2	2202.45	2095.09	592.848	527.174	1288.85	1998.91	802.957	- && sp|Q90837|ERG_CHICK Transcriptional regulator Erg OS=Gallus gallus OX=9031 GN=ERG PE=2 SV=1 && PF00178:Ets-domain|PF02198:Sterile alpha motif (SAM)/Pointed domain	1.31552	0.00364411	0.0961069	up
Cg17912	1.19159	14.9066	6.4168	41.5864	46.9664	50.0125	7.50499	46.1885	- && - && -	-2.59831	0.00365338	0.096216	down
Cg27022	147.757	558.996	259.881	59.9618	123.646	120.522	322.211	101.377	- && - && -	1.66876	0.00366029	0.0962624	up
Cg00203	2.38317	63.3529	33.1535	5.80276	0	0.819877	32.9632	2.20755	- && - && PF00059:Lectin C-type domain	3.91847	0.00368306	0.0966882	up
Cg29428	170.397	272.977	121.919	74.4687	30.672	76.2486	188.431	60.4631	- && sp|Q8LPL3|ASO_ARATH L-ascorbate oxidase OS=Arabidopsis thaliana OX=3702 GN=AAO PE=1 SV=1 && PF00394:Multicopper oxidase|PF07732:Multicopper oxidase|PF07731:Multicopper oxidase	1.63958	0.00368962	0.0966882	up
novel.7167	5.95794	1.86332	2.13893	23.211	36.423	21.3168	3.32006	26.9836	- && - && -	-3.04667	0.00369197	0.0966882	down
Cg29536	10.7243	16.7699	10.6947	53.1919	103.518	25.4162	12.7296	60.7087	- && - && -	-2.24701	0.00371236	0.0970865	down
Cg16104	315.771	336.329	399.981	132.496	173.488	153.317	350.694	153.101	- && sp|Q9EQN5|SMBP2_RAT DNA-binding protein SMUBP-2 OS=Rattus norvegicus OX=10116 GN=Ighmbp2 PE=1 SV=1 && PF13087:AAA domain|PF01428:AN1-like Zinc finger|PF01424:R3H domain|PF13086:AAA domain	1.19577	0.00371787	0.0970949	up
Cg20697	0	47.5147	1.06947	0	0	0	16.1947	0	- && - && -	6.59624	0.00372601	0.0971721	up
Cg02835	27.4065	28.8815	17.1115	0.967126	0	4.91926	24.4665	1.96213	- && - && -	3.6017	0.00373215	0.0971969	up
Cg04989	13.1075	42.8564	212.824	8.70414	0	21.3168	89.596	10.007	- && - && PF10324:Serpentine type 7TM GPCR chemoreceptor Srw	3.15416	0.00374246	0.0973075	up
Cg04628	1118.9	532.91	971.076	332.691	193.617	470.61	874.296	332.306	- && sp|Q08462|ADCY2_HUMAN Adenylate cyclase type 2 OS=Homo sapiens OX=9606 GN=ADCY2 PE=1 SV=5 && PF00211:Adenylate and Guanylate cyclase catalytic domain|PF16214:Adenylyl cyclase N-terminal extracellular and transmembrane region	1.39482	0.00375894	0.0973075	up
Cg08237	77.4532	344.714	222.449	85.1071	12.4605	57.3914	214.872	51.653	- && - && PF00050:Kazal-type serine protease inhibitor domain	2.05731	0.00376176	0.0973075	up
Cg12476	100.093	66.1479	64.168	240.814	173.488	184.472	76.8031	199.592	- && sp|G3V9D0|PGLT1_RAT Protein O-glucosyltransferase 1 OS=Rattus norvegicus OX=10116 GN=Poglut1 PE=3 SV=1 && PF05686:Glycosyl transferase family 90	-1.37972	0.00376302	0.0973075	down
novel.1901	269.299	435.085	88.7658	1180.86	626.858	649.343	264.383	819.021	- && - && -	-1.6305	0.0037767	0.0973075	down
Cg03533	1240.44	599.058	421.37	330.757	169.654	310.734	753.623	270.382	- && sp|Q865F7|FABPH_MYOLU Fatty acid-binding protein, heart OS=Myotis lucifugus OX=59463 GN=FABP3 PE=2 SV=3 && PF00061:Lipocalin / cytosolic fatty-acid binding protein family	1.4783	0.00377818	0.0973075	up
Cg20479	220.444	208.692	180.74	57.0605	37.3814	112.323	203.292	68.9217	- && - && PF00001:7 transmembrane receptor (rhodopsin family)	1.55753	0.00378072	0.0973075	up
Cg16527	9.5327	20.4965	9.62521	29.0138	133.231	40.174	13.2181	67.473	- && - && PF00386:C1q domain	-2.34305	0.00378101	0.0973075	down
Cg11504	8.34111	0.931661	1.06947	29.0138	40.2569	22.1367	3.44741	30.4691	- && sp|O43301|HS12A_HUMAN Heat shock 70 kDa protein 12A OS=Homo sapiens OX=9606 GN=HSPA12A PE=1 SV=2 && -	-3.18176	0.00378489	0.0973075	down
Cg09059	60.771	0	14.9725	0	1.917	0	25.2478	0.638999	- && - && -	5.33384	0.00379184	0.0973075	up
Cg27143	7.14952	9.31661	9.62521	56.0933	41.2154	30.3355	8.69711	42.5481	- && - && -	-2.28584	0.00379356	0.0973075	down
Cg27067	33.3644	74.5328	90.9047	76.403	496.502	191.851	66.2673	254.919	- && sp|P04464|CALM_WHEAT Calmodulin OS=Triticum aestivum OX=4565 PE=1 SV=3 && PF13499:EF-hand domain pair	-1.9418	0.00380387	0.0974385	down
Cg06786	842.452	554.338	674.834	278.532	242.5	383.703	690.541	301.578	- && sp|Q7K556|TTD14_DROME TRPL translocation defect protein 14 OS=Drosophila melanogaster OX=7227 GN=Ttd14 PE=1 SV=1 && PF13521:AAA domain	1.19439	0.0038573	0.0986722	up
Cg06048	50.0467	102.483	127.267	19.3425	18.2115	38.5342	93.2653	25.3627	- && sp|Q9NRH2|SNRK_HUMAN SNF-related serine/threonine-protein kinase OS=Homo sapiens OX=9606 GN=SNRK PE=1 SV=2 && PF00069:Protein kinase domain	1.87542	0.00387018	0.0988665	up
Cg20684	138.224	213.35	188.226	63.8303	79.5554	65.5902	179.934	69.6586	- && sp|Q6Q899|DDX58_MOUSE Antiviral innate immune response receptor RIG-I OS=Mus musculus OX=10090 GN=Ddx58 PE=1 SV=2 && PF16739:Caspase recruitment domain|PF04851:Type III restriction enzyme, res subunit|PF07679:Immunoglobulin I-set domain|PF18738:DZIP3/ hRUL138-like HEPN|PF11648:C-terminal domain of RIG-I|PF00271:Helicase conserved C-terminal domain|PF18119:RIG-I receptor C-terminal domain	1.3703	0.0038795	0.0989526	up
Cg07048	0	0	0	6.76988	28.755	1.63975	0	12.3882	- && - && -	-5.98888	0.00388412	0.0989526	down
Cg23720	361.051	173.289	96.2521	7.73701	100.642	20.4969	210.197	42.9588	- && sp|Q9SZJ2|GRDP2_ARATH Glycine-rich domain-containing protein 2 OS=Arabidopsis thaliana OX=3702 GN=GRDP2 PE=2 SV=1 && PF07173:Glycine-rich domain-containing protein-like	2.29173	0.0039071	0.099242	up
Cg15904	239.509	118.321	273.784	81.2386	77.6384	72.1492	210.538	77.0087	- && - && PF00531:Death domain	1.45031	0.00391521	0.099242	up
Cg18522	3548.55	2264.87	4463.96	1548.37	816.641	1805.37	3425.79	1390.13	- && - && PF00622:SPRY domain	1.30107	0.00391824	0.099242	up
Cg26767	162.056	436.949	167.906	1651.85	330.682	630.486	255.637	871.006	- && sp|P24862|CCNB_PATVU G2/mitotic-specific cyclin-B OS=Patella vulgata OX=6465 PE=2 SV=1 && PF00134:Cyclin, N-terminal domain|PF02984:Cyclin, C-terminal domain	-1.76751	0.00391906	0.099242	down
Cg15180	601.752	542.226	180.74	48.3563	204.16	141.019	441.573	131.178	- && - && -	1.75085	0.00392198	0.099242	up
Cg20916	20.257	71.7379	90.9047	324.954	111.186	211.528	60.9665	215.89	- && sp|Q7ZY08|UBE2T_XENLA Ubiquitin-conjugating enzyme E2 T OS=Xenopus laevis OX=8355 GN=ube2t PE=2 SV=1 && PF00179:Ubiquitin-conjugating enzyme	-1.82133	0.00393473	0.0994302	down
Cg13973	0	0	0	3.86851	22.0455	8.19877	0	11.3709	- && sp|O73917|PAX6_ORYLA Paired box protein Pax-6 OS=Oryzias latipes OX=8090 GN=pax6 PE=2 SV=1 && PF00292:'Paired box' domain|PF00046:Homeodomain	-5.8667	0.00394215	0.0994835	down
Cg06355	3959.64	11280.5	5685.29	1121.87	1306.43	4228.11	6975.16	2218.8	- && sp|P22757|HE_PARLI Hatching enzyme OS=Paracentrotus lividus OX=7656 PE=1 SV=1 && PF00413:Matrixin|PF00045:Hemopexin	1.65236	0.00394803	0.0994979	up
Cg07649	1.19159	13.9749	5.34734	39.6522	66.1364	28.6957	6.83794	44.8281	- && sp|Q7SXM0|HDAC8_DANRE Histone deacetylase 8 OS=Danio rerio OX=7955 GN=hdac8 PE=2 SV=1 && PF00850:Histone deacetylase domain	-2.68753	0.00395992	0.0996634	down
Cg06614	1788.57	1072.34	1729.33	439.075	767.757	759.206	1530.08	655.346	- && sp|A8WGA0|C27C1_DANRE Cytochrome P450 27C1 OS=Danio rerio OX=7955 GN=cyp27c1 PE=1 SV=2 && PF00067:Cytochrome P450	1.22299	0.00398181	0.10008	up
Cg27911	60.771	128.569	101.599	31.9152	21.087	35.2547	96.9798	29.419	- && sp|Q6GNT7|GOGA5_XENLA Golgin subfamily A member 5 OS=Xenopus laevis OX=8355 GN=golga5 PE=2 SV=1 && PF09787:Golgin subfamily A member 5	1.7211	0.00399475	0.100204	up
Cg10040	112.009	207.76	80.2101	413.93	319.18	327.951	133.327	353.687	- && sp|P21839|ODBB_BOVIN 2-oxoisovalerate dehydrogenase subunit beta, mitochondrial OS=Bos taurus OX=9913 GN=BCKDHB PE=1 SV=2 && PF02780:Transketolase, C-terminal domain|PF02779:Transketolase, pyrimidine binding domain	-1.40542	0.00400229	0.100204	down
Cg05922	84.6027	103.414	86.6269	529.985	135.148	193.491	91.548	286.208	- && sp|Q58CS6|IFT20_BOVIN Intraflagellar transport protein 20 homolog OS=Bos taurus OX=9913 GN=IFT20 PE=2 SV=1 && PF14931:Intraflagellar transport complex B, subunit 20	-1.64349	0.00400372	0.100204	down
Cg30266	64.3457	52.173	73.7932	186.655	97.7669	276.299	63.4373	186.907	- && - && PF13499:EF-hand domain pair	-1.56067	0.00400815	0.100204	down
Cg09989	137.033	203.102	102.669	818.189	162.945	432.075	147.601	471.07	- && sp|Q6NYU7|UPP_DANRE Uracil phosphoribosyltransferase homolog OS=Danio rerio OX=7955 GN=uprt PE=2 SV=1 && PF14681:Uracil phosphoribosyltransferase	-1.67336	0.00402877	0.100585	down
Cg23700	1608.64	450.924	1668.37	3419.76	5219.98	2210.39	1242.65	3616.71	- && sp|P73574|FABG_SYNY3 3-oxoacyl-[acyl-carrier-protein] reductase OS=Synechocystis sp. (strain PCC 6803 / Kazusa) OX=1111708 GN=fabG PE=1 SV=1 && -	-1.54146	0.00404219	0.100777	down
Cg30447	356.285	488.19	606.388	166.346	181.156	261.541	483.621	203.014	- && sp|P26009|ITA8_CHICK Integrin alpha-8 OS=Gallus gallus OX=9031 GN=ITGA8 PE=1 SV=1 && PF08441:Integrin alpha|PF01839:FG-GAP repeat|PF00811:Ependymin	1.25183	0.00404748	0.100777	up
Cg23743	0	2.79498	0	5.80276	30.672	26.2361	0.931661	20.9036	- && - && PF01390:SEA domain	-4.40175	0.00405262	0.100777	down
Cg10905	294.322	224.53	167.906	83.1729	68.0534	112.323	228.92	87.8498	- && sp|Q9NUV9|GIMA4_HUMAN GTPase IMAP family member 4 OS=Homo sapiens OX=9606 GN=GIMAP4 PE=1 SV=1 && PF04548:AIG1 family	1.37998	0.0040633	0.100909	up
Cg21950	2.38317	7.45328	0	31.9152	28.755	31.1553	3.27882	30.6085	- && - && -	-3.1933	0.00406984	0.100911	down
Cg05033	20.257	36.3348	47.0566	177.951	84.3479	86.907	34.5494	116.402	- && sp|Q5BIX7|SPDLA_XENLA Protein Spindly-A OS=Xenopus laevis OX=8355 GN=spdl1-a PE=2 SV=1 && -	-1.7489	0.00407417	0.100911	down
Cg22042	91.7522	661.479	198.921	78.3372	92.9744	92.6461	317.384	87.9859	- && - && -	1.85194	0.00409129	0.101201	up
Cg04024	41.7056	69.8745	53.4734	264.993	103.518	133.64	55.0178	167.383	- && sp|Q9I9A7|CDT1_XENLA DNA replication factor Cdt1 OS=Xenopus laevis OX=8355 GN=cdt1 PE=1 SV=2 && PF08839:DNA replication factor CDT1 like|PF16679:DNA replication factor Cdt1 C-terminal domain	-1.60224	0.00411328	0.101611	down
novel.4674	28.5981	49.378	63.0986	95.7455	139.941	195.951	47.0249	143.879	- && P32929.3 RecName: Full=Cystathionine gamma-lyase; AltName: Full=Cysteine-protein sulfhydrase; AltName: Full=Gamma-cystathionase && PF01053:Cys/Met metabolism PLP-dependent enzyme	-1.61182	0.00413186	0.101935	down
Cg29178	453.995	239.437	423.509	374.278	1386.95	1524.97	372.314	1095.4	- && - && PF00080:Copper/zinc superoxide dismutase (SODC)	-1.55745	0.00414485	0.102095	down
Cg16990	1476.38	1563.33	2836.23	487.432	989.171	905.964	1958.64	794.189	- && sp|Q6ZUJ8|BCAP_HUMAN Phosphoinositide 3-kinase adapter protein 1 OS=Homo sapiens OX=9606 GN=PIK3AP1 PE=1 SV=2 && PF14545:Dof, BCAP, and BANK (DBB) motif,	1.30221	0.00415129	0.102095	up
Cg16715	0	0	0	8.70414	18.2115	5.73914	0	10.8849	- && - && PF13359:DDE superfamily endonuclease	-5.80295	0.00415466	0.102095	down
Cg16281	2261.63	1173.89	1448.06	455.516	1010.26	317.293	1627.86	594.356	- && sp|Q6YHK3|CD109_HUMAN CD109 antigen OS=Homo sapiens OX=9606 GN=CD109 PE=1 SV=2 && PF07677:A-macroglobulin receptor binding domain|PF00207:Alpha-2-macroglobulin family|PF17791:Macroglobulin domain MG3|PF07678:A-macroglobulin TED domain|PF07703:Alpha-2-macroglobulin bait region domain|PF01835:MG2 domain	1.45371	0.00416709	0.102266	up
novel.1117	69.1121	35.4031	44.9176	7.73701	15.336	10.6584	49.8109	11.2438	- && - && -	2.14554	0.00420307	0.103014	up
Cg24309	175.163	274.84	165.767	56.0933	76.6799	98.3853	205.257	77.0528	- && sp|P61162|ACTZ_CANLF Alpha-centractin OS=Canis lupus familiaris OX=9615 GN=ACTR1A PE=2 SV=1 && PF00022:Actin	1.41297	0.0042234	0.103377	up
Cg08748	88.1775	82.9178	89.8353	18.3754	35.4645	27.8758	86.9768	27.2386	- && - && PF13499:EF-hand domain pair	1.67438	0.00423827	0.103605	up
Cg03971	283.598	473.284	497.302	124.759	164.862	219.727	418.061	169.783	- && sp|Q61909|MTG8_MOUSE Protein CBFA2T1 OS=Mus musculus OX=10090 GN=Runx1t1 PE=2 SV=1 && PF08788:NHR2 domain like|PF01753:MYND finger|PF07531:NHR1 homology to TAF	1.29966	0.00426405	0.1041	up
Cg19480	21.4486	68.9429	11.7641	361.705	28.755	141.019	34.0519	177.16	- && - && -	-2.37389	0.00427858	0.104151	down
Cg20569	64.3457	24.2232	164.698	25.1453	7.66799	18.8572	84.4223	17.2235	- && - && -	2.29181	0.0042812	0.104151	up
Cg11901	2.38317	0.931661	2.13893	35.7837	19.17	9.01865	1.81792	21.3241	- && sp|P24453|CP1A2_MESAU Cytochrome P450 1A2 OS=Mesocricetus auratus OX=10036 GN=CYP1A2 PE=1 SV=4 && PF00067:Cytochrome P450	-3.57038	0.00428863	0.104151	down
novel.4030	0	0	0	24.1782	2.8755	7.3789	0	11.4775	- && - && -	-5.87967	0.00429242	0.104151	down
Cg08477	818.62	858.991	717.613	2412.01	1463.63	1398.71	798.408	1758.12	- && sp|Q2TBP7|MYCBP_BOVIN c-Myc-binding protein OS=Bos taurus OX=9913 GN=MYCBP PE=3 SV=3 && -	-1.13872	0.00429396	0.104151	down
Cg08309	296.705	531.978	239.561	116.055	51.7589	185.292	356.081	117.702	- && sp|P32240|PE2R4_MOUSE Prostaglandin E2 receptor EP4 subtype OS=Mus musculus OX=10090 GN=Ptger4 PE=2 SV=1 && PF00001:7 transmembrane receptor (rhodopsin family)	1.59617	0.00431075	0.104423	up
Cg10219	9.5327	23.2915	1.06947	0	0	0	11.2979	0	- && - && -	6.07565	0.00431939	0.104497	up
Cg22055	17.8738	3.72664	17.1115	213.735	0.958499	108.224	12.904	107.639	- && - && -	-3.06655	0.00433709	0.10479	down
novel.5925	8.34111	25.1548	2.13893	124.759	38.3399	44.2734	11.8783	69.1242	- && - && -	-2.52738	0.00435083	0.104889	down
Cg00499	0	28.8815	60.9596	2.90138	0	1.63975	29.947	1.51371	- && sp|Q071E0|KT5AA_DANRE N-lysine methyltransferase KMT5A-A OS=Danio rerio OX=7955 GN=kmt5aa PE=2 SV=1 && -	4.30694	0.00435736	0.104889	up
Cg04001	194.229	227.325	268.436	878.151	372.856	473.069	229.997	574.692	- && sp|Q5M8X5|TPC2L_XENTR Trafficking protein particle complex subunit 2-like protein OS=Xenopus tropicalis OX=8364 GN=trappc2l PE=2 SV=1 && PF04628:Sedlin, N-terminal conserved region	-1.32079	0.00435801	0.104889	down
novel.5867	1.19159	0	0	5.80276	23.9625	12.2982	0.397196	14.0211	- && - && -	-5.20757	0.00438242	0.105315	down
Cg29547	3.57476	0	4.27787	42.5536	10.5435	29.5156	2.61754	27.5375	- && sp|O75132|ZBED4_HUMAN Zinc finger BED domain-containing protein 4 OS=Homo sapiens OX=9606 GN=ZBED4 PE=1 SV=2 && PF02892:BED zinc finger|PF05699:hAT family C-terminal dimerisation region	-3.42382	0.00438697	0.105315	down
Cg05614	505.233	233.847	395.703	176.017	156.235	122.982	378.261	151.745	- && sp|Q6DDL7|UN93A_XENLA Protein unc-93 homolog A OS=Xenopus laevis OX=8355 GN=unc93a PE=2 SV=1 && PF05978:Ion channel regulatory protein UNC-93	1.31752	0.00440147	0.105528	up
Cg24852	181.121	313.038	195.713	430.371	1068.73	393.541	229.957	630.879	- && sp|Q6NVN0|SOX2_XENTR Transcription factor Sox-2 OS=Xenopus tropicalis OX=8364 GN=sox2 PE=2 SV=1 && PF12336:SOX transcription factor|PF00505:HMG (high mobility group) box	-1.45496	0.00441074	0.105615	down
Cg28270	393.224	356.826	659.861	155.707	132.273	264.001	469.97	183.994	- && sp|Q96RW7|HMCN1_HUMAN Hemicentin-1 OS=Homo sapiens OX=9606 GN=HMCN1 PE=1 SV=2 && PF13927:Immunoglobulin domain	1.35185	0.00442217	0.105754	up
Cg25287	800.747	890.668	1224.54	346.231	378.607	565.715	971.985	430.185	- && - && PF00169:PH domain	1.17561	0.00445558	0.106285	up
Cg00226	29.7897	37.2664	48.126	275.631	34.506	147.578	38.394	152.572	- && - && -	-1.98963	0.00445576	0.106285	down
Cg03371	28.5981	93.1661	19.2504	13.5398	3.83399	5.73914	47.0049	7.7043	- && sp|Q9Y4G6|TLN2_HUMAN Talin-2 OS=Homo sapiens OX=9606 GN=TLN2 PE=1 SV=4 && PF01608:I/LWEQ domain	2.61641	0.00446504	0.106371	up
Cg06961	736.401	820.793	865.199	190.524	164.862	532.1	807.464	295.829	- && sp|Q5BKC9|NGEF_RAT Ephexin-1 OS=Rattus norvegicus OX=10116 GN=Ngef PE=1 SV=2 && PF00018:SH3 domain|PF00621:RhoGEF domain|PF00169:PH domain	1.44769	0.00447452	0.106462	up
Cg14402	2.38317	9.31661	0	7.73701	108.31	17.2174	3.89993	44.4216	- && - && -	-3.48471	0.0044984	0.106894	down
Cg09009	436.121	273.908	187.157	105.417	101.601	138.559	299.062	115.192	- && sp|P70627|FOLH1_RAT Glutamate carboxypeptidase 2 OS=Rattus norvegicus OX=10116 GN=Folh1 PE=1 SV=1 && PF04253:Transferrin receptor-like dimerisation domain|PF04389:Peptidase family M28|PF02225:PA domain	1.37504	0.00450613	0.106916	up
novel.496	0	0	0	32.8823	0	10.6584	0	14.5136	- && - && -	-6.2188	0.00451074	0.106916	down
Cg26284	78.6448	340.056	396.772	26.1124	138.024	31.9752	271.824	65.3705	- && - && -	2.0578	0.00453745	0.107315	up
Cg05141	137.033	190.99	106.947	44.4878	46.0079	65.5902	144.99	52.0286	- && sp|Q96BZ8|LENG1_HUMAN Leukocyte receptor cluster member 1 OS=Homo sapiens OX=9606 GN=LENG1 PE=1 SV=1 && PF10197:N-terminal domain of CBF1 interacting co-repressor CIR	1.47773	0.00454147	0.107315	up
Cg14806	45.2803	90.3711	78.0711	129.595	296.176	186.112	71.2408	203.961	- && sp|Q62252|SP17_MOUSE Sperm surface protein Sp17 OS=Mus musculus OX=10090 GN=Spa17 PE=1 SV=1 && PF02197:Regulatory subunit of type II PKA R-subunit	-1.51481	0.00454475	0.107315	down
Cg18604	63.1541	105.278	81.2795	247.584	187.866	193.491	83.2371	209.647	- && sp|P55866|CASP3_XENLA Caspase-3 OS=Xenopus laevis OX=8355 GN=casp3 PE=2 SV=1 && PF00656:Caspase domain	-1.33014	0.00456491	0.10757	down
Cg14432	84.6027	59.6263	81.2795	207.932	158.152	198.41	75.1695	188.165	- && - && PF15341:Ribosome biogenesis protein SLX9	-1.32563	0.00456704	0.10757	down
Cg05767	218.06	232.915	181.809	764.997	332.599	454.212	210.928	517.269	- && sp|Q9W704|RIPA_XENLA RPA-interacting protein A OS=Xenopus laevis OX=8355 GN=rpain-a PE=1 SV=1 && PF14766:Replication protein A interacting N-terminal|PF14768:Replication protein A interacting C-terminal	-1.29388	0.00459191	0.107956	down
novel.657	0	0	0	35.7837	0	8.19877	0	14.6608	- && - && -	-6.23304	0.00459496	0.107956	down
Cg02988	2222.31	708.994	417.092	417.799	158.152	426.336	1116.13	334.096	- && sp|Q16878|CDO1_HUMAN Cysteine dioxygenase type 1 OS=Homo sapiens OX=9606 GN=CDO1 PE=1 SV=2 && PF05995:Cysteine dioxygenase type I	1.73971	0.00460829	0.108133	up
Cg13080	36.9392	0	14.9725	0	0.958499	0	17.3039	0.3195	- && sp|Q98ST7|MOXD1_CHICK DBH-like monooxygenase protein 1 OS=Gallus gallus OX=9031 GN=MOXD1 PE=2 SV=1 && PF03351:DOMON domain|PF01082:Copper type II ascorbate-dependent monooxygenase, N-terminal domain|PF03712:Copper type II ascorbate-dependent monooxygenase, C-terminal domain	5.72195	0.00461545	0.108166	up
Cg11732	38.1308	21.4282	12.8336	149.905	37.3814	103.305	24.1309	96.8635	- && sp|Q13507|TRPC3_HUMAN Short transient receptor potential channel 3 OS=Homo sapiens OX=9606 GN=TRPC3 PE=1 SV=3 && PF08344:Transient receptor ion channel II|PF00520:Ion transport protein	-2.00964	0.00463469	0.108481	down
novel.2801	10.7243	67.0796	8.55574	254.354	42.1739	147.578	28.7865	148.035	- && P58682.2 RecName: Full=Toll-like receptor 8; AltName: CD_antigen=CD288; Flags: Precursor && PF01582:TIR domain|PF13855:Leucine rich repeat	-2.35402	0.00464571	0.108603	down
Cg28522	7196	6168.52	7363.28	3155.73	1057.22	3793.57	6909.27	2668.84	- && sp|Q16YG0|CDC42_AEDAE Cdc42 homolog OS=Aedes aegypti OX=7159 GN=Cdc42 PE=3 SV=1 && PF00071:Ras family	1.37225	0.00465506	0.108686	up
Cg04903	1387.01	2558.34	1855.53	234.045	489.793	1210.14	1933.62	644.659	- && sp|B0R0D7|COR1C_DANRE Coronin-1C-A OS=Danio rerio OX=7955 GN=coro1ca PE=2 SV=1 && PF16300:Type of WD40 repeat|PF08953:Domain of unknown function (DUF1899)	1.58437	0.00470131	0.109499	up
Cg06855	5363.33	3877.57	5437.17	2308.53	1519.22	2841.69	4892.69	2223.15	- && sp|Q62737|CY24A_RAT Cytochrome b-245 light chain OS=Rattus norvegicus OX=10116 GN=Cyba PE=1 SV=3 && PF05038:Cytochrome Cytochrome b558 alpha-subunit	1.13792	0.00470401	0.109499	up
Cg28885	9.5327	59.6263	35.2924	0.967126	5.75099	6.55902	34.8171	4.42571	- && - && PF00643:B-box zinc finger	2.97039	0.00470742	0.109499	up
Cg12801	713.761	758.372	572.165	263.058	95.8499	382.883	681.433	247.264	- && sp|O15083|ERC2_HUMAN ERC protein 2 OS=Homo sapiens OX=9606 GN=ERC2 PE=1 SV=3 && PF10174:RIM-binding protein of the cytomatrix active zone	1.4618	0.00474842	0.110229	up
Cg11471	1.19159	0	9.62521	42.5536	30.672	28.6957	3.6056	33.9737	- && sp|Q14191|WRN_HUMAN Werner syndrome ATP-dependent helicase OS=Homo sapiens OX=9606 GN=WRN PE=1 SV=2 && PF00271:Helicase conserved C-terminal domain|PF00270:DEAD/DEAH box helicase	-3.24354	0.00475385	0.110229	down
Cg04902	51.2383	86.6444	82.349	169.247	221.413	175.454	73.4106	188.705	- && - && -	-1.35959	0.00475649	0.110229	down
Cg18905	3138.64	4474.77	5909.88	1853.01	1943.84	2416.18	4507.76	2071.01	- && sp|P27447|YES_XIPHE Tyrosine-protein kinase Yes OS=Xiphophorus helleri OX=8084 GN=yes PE=2 SV=3 && PF07714:Protein tyrosine and serine/threonine kinase|PF00017:SH2 domain|PF00018:SH3 domain	1.12206	0.00478507	0.110553	up
Cg06226	504.041	196.58	143.309	83.1729	101.601	100.845	281.31	95.2062	- && sp|P17972|KCNAW_DROME Potassium voltage-gated channel protein Shaw OS=Drosophila melanogaster OX=7227 GN=Shaw PE=2 SV=1 && PF02214:BTB/POZ domain|PF00520:Ion transport protein	1.56174	0.00478938	0.110553	up
Cg15318	234.743	255.275	213.893	29.0138	62.3024	134.46	234.637	75.2587	- && sp|P34257|TC3A_CAEEL Transposable element Tc3 transposase OS=Caenorhabditis elegans OX=6239 GN=tc3a PE=1 SV=1 && PF01498:Transposase|PF13358:DDE superfamily endonuclease|PF12697:Alpha/beta hydrolase family	1.63764	0.0047903	0.110553	up
Cg03909	14.299	34.4714	36.3619	63.8303	162.945	79.5281	28.3775	102.101	- && - && -	-1.84203	0.00479408	0.110553	down
Cg20116	41.7056	0	10.6947	0	0	0.819877	17.4667	0.273292	- && - && PF18014:Acetyltransferase (GNAT) domain|PF13508:Acetyltransferase (GNAT) domain	5.73516	0.00481751	0.110957	up
Cg22065	56.0046	137.886	167.906	187.623	715.999	271.379	120.599	391.667	- && sp|A6H782|TEKT3_BOVIN Tektin-3 OS=Bos taurus OX=9913 GN=TEKT3 PE=1 SV=1 && PF03148:Tektin family	-1.69795	0.00485383	0.111656	down
novel.4962	0	0.931661	0	25.1453	0	29.5156	0.310554	18.2203	- && - && -	-5.58697	0.00486919	0.111872	down
Cg14455	10.7243	14.9066	25.6672	120.891	42.1739	50.0125	17.0994	71.0257	- && - && -	-2.05167	0.00488259	0.111909	down
Cg19099	220.444	266.455	295.173	63.8303	92.0159	146.758	260.691	100.868	- && sp|Q8TEU7|RPGF6_HUMAN Rap guanine nucleotide exchange factor 6 OS=Homo sapiens OX=9606 GN=RAPGEF6 PE=1 SV=2 && PF00618:RasGEF N-terminal motif|PF00595:PDZ domain|PF00027:Cyclic nucleotide-binding domain|PF00617:RasGEF domain|PF00788:Ras association (RalGDS/AF-6) domain	1.36828	0.00488274	0.111909	up
Cg12987	70.3037	229.189	119.78	207.932	4543.28	391.901	139.757	1714.37	- && - && -	-3.61623	0.00489004	0.111939	down
Cg28105	5.95794	11.1799	6.4168	8.70414	82.4309	54.9318	7.85156	48.6889	- && sp|Q3E9C0|CDPKY_ARATH Calcium-dependent protein kinase 34 OS=Arabidopsis thaliana OX=3702 GN=CPK34 PE=2 SV=1 && PF13499:EF-hand domain pair	-2.62513	0.00489951	0.112019	down
Cg20269	271.682	1180.41	254.533	131.529	140.899	243.504	568.876	171.977	- && sp|P02518|HSP27_DROME Heat shock protein 27 OS=Drosophila melanogaster OX=7227 GN=Hsp27 PE=1 SV=2 && PF00011:Hsp20/alpha crystallin family	1.72595	0.0049222	0.1124	up
Cg09036	1.19159	2.79498	2.13893	40.6193	5.75099	22.9566	2.04183	23.109	- && - && -	-3.48285	0.00493169	0.11248	down
Cg21703	73.8784	111.799	80.2101	150.872	443.785	178.733	88.6292	257.797	- && sp|Q6DCD1|FGGY_XENLA FGGY carbohydrate kinase domain-containing protein OS=Xenopus laevis OX=8355 GN=fggy PE=2 SV=2 && -	-1.53865	0.00495001	0.112699	down
Cg12635	668.48	1067.68	1542.17	343.33	300.969	642.784	1092.78	429.027	- && - && PF00582:Universal stress protein family	1.3485	0.00495334	0.112699	up
novel.4697	2227.08	220.804	24.5977	0	11.502	33.615	824.159	15.039	- && - && -	5.77417	0.00496094	0.112735	up
Cg27369	4.76635	3.72664	0	41.5864	9.58499	33.615	2.831	28.2621	- && - && PF05811:Eukaryotic protein of unknown function (DUF842)	-3.32498	0.00498487	0.113133	down
novel.6824	0	0.931661	1.06947	13.5398	23.9625	9.83853	0.667043	15.7803	- && - && -	-4.51756	0.00499052	0.113133	down
Cg20254	25.0233	16.7699	4.27787	63.8303	133.231	28.6957	15.357	75.2525	- && sp|Q4R9E0|TECT3_MACFA Tectonic-3 OS=Macaca fascicularis OX=9541 GN=TCTN3 PE=2 SV=1 && PF07773:Protein of unknown function (DUF1619)	-2.29549	0.00509555	0.115374	down
Cg10179	722.102	1009.92	1184.97	328.823	305.761	600.97	972.331	411.851	- && - && -	1.23891	0.00512694	0.115865	up
Cg18639	57.1962	49.378	73.7932	269.828	114.061	132.82	60.1225	172.237	- && - && -	-1.51861	0.00512962	0.115865	down
Cg17179	867.476	147.202	1353.95	197.294	292.342	208.249	789.541	232.628	- && sp|P35408|PE2R4_HUMAN Prostaglandin E2 receptor EP4 subtype OS=Homo sapiens OX=9606 GN=PTGER4 PE=1 SV=1 && PF00001:7 transmembrane receptor (rhodopsin family)	1.76282	0.00514083	0.115978	up
Cg29408	1353.64	2268.59	1152.89	719.542	421.739	851.033	1591.71	664.105	- && sp|Q02858|TIE2_MOUSE Angiopoietin-1 receptor OS=Mus musculus OX=10090 GN=Tek PE=1 SV=2 && PF13359:DDE superfamily endonuclease|PF07714:Protein tyrosine and serine/threonine kinase	1.26106	0.00515608	0.116086	up
Cg20605	0	0.931661	0	5.80276	28.755	7.3789	0.310554	13.9789	- && sp|Q9I9H2|DBX1_XENLA Homeobox protein DBX1 OS=Xenopus laevis OX=8355 GN=dbx1 PE=2 SV=1 && PF00046:Homeodomain	-5.20213	0.00515995	0.116086	down
Cg04299	64.3457	87.5761	27.8062	158.609	230.04	145.118	59.9093	177.922	- && sp|A8TX70|CO6A5_HUMAN Collagen alpha-5(VI) chain OS=Homo sapiens OX=9606 GN=COL6A5 PE=1 SV=1 && PF00092:von Willebrand factor type A domain	-1.56819	0.00516419	0.116086	down
Cg10940	338.411	323.286	905.839	90.9099	291.384	126.261	522.512	169.518	- && - && PF08357:SEFIR domain	1.62435	0.00521051	0.116987	up
Cg04582	1.19159	7.45328	2.13893	43.5207	21.087	22.1367	3.5946	28.9148	- && - && -	-2.97532	0.00523313	0.117354	down
Cg13984	5.95794	3.72664	1.06947	59.9618	5.75099	30.3355	3.58468	32.0161	- && sp|P55006|RDH7_RAT Retinol dehydrogenase 7 OS=Rattus norvegicus OX=10116 GN=Rdh7 PE=1 SV=1 && PF00106:short chain dehydrogenase	-3.16782	0.00525495	0.117702	down
Cg11184	314.579	604.648	927.228	157.642	171.571	342.709	615.485	223.974	- && sp|P98174|FGD1_HUMAN FYVE, RhoGEF and PH domain-containing protein 1 OS=Homo sapiens OX=9606 GN=FGD1 PE=1 SV=2 && PF00621:RhoGEF domain|PF01363:FYVE zinc finger	1.4578	0.00528688	0.118276	up
Cg15222	1070.05	1203.71	443.829	538.689	233.874	177.913	905.86	316.825	- && sp|E7F021|ZD12B_DANRE Palmitoyltransferase ZDHHC12-B OS=Danio rerio OX=7955 GN=zdhhc12b PE=3 SV=1 && PF01529:DHHC palmitoyltransferase	1.51613	0.00530498	0.118539	up
Cg13794	1.19159	6.52162	2.13893	20.3097	44.0909	18.0373	3.28405	27.4793	- && sp|Q8VHR0|PCD18_MOUSE Protocadherin 18 OS=Mus musculus OX=10090 GN=Pcdh18 PE=1 SV=2 && PF00028:Cadherin domain|PF08266:Cadherin-like	-3.03301	0.00538049	0.120083	down
Cg08070	0	0	0	21.2768	0.958499	12.2982	0	11.5111	- && - && -	-5.88511	0.00538873	0.120124	down
Cg22666	193.037	129.501	148.656	6.76988	76.6799	36.0746	157.065	39.8415	- && - && PF18112:Autophagy receptor zinc finger-C2H2 domain	1.97876	0.00540242	0.120286	up
novel.1486	307.43	364.279	191.435	773.701	831.977	452.572	287.714	686.083	- && Q13255.3 RecName: Full=Metabotropic glutamate receptor 1; Short=mGluR1; Flags: Precursor && PF00003:7 transmembrane sweet-taste receptor of 3 GCPR	-1.25319	0.00542374	0.120617	down
Cg17506	35.7476	34.4714	79.1406	242.749	84.3479	150.857	49.7865	159.318	- && sp|O97125|HSP68_DROME Heat shock protein 68 OS=Drosophila melanogaster OX=7227 GN=Hsp68 PE=1 SV=1 && PF10639:Putative transmembrane family 234|PF00012:Hsp70 protein	-1.67825	0.00543693	0.120679	down
Cg18552	1.19159	0	1.06947	0	76.6799	2.45963	0.753685	26.3798	- && - && -	-5.17234	0.00543941	0.120679	down
novel.2310	32.1729	31.6765	44.9176	128.628	91.0574	93.466	36.2556	104.384	- && - && -	-1.52549	0.00544892	0.12074	down
Cg26499	25.0233	21.4282	7.48627	1.93425	0	1.63975	17.9793	1.19134	- && sp|Q96FW1|OTUB1_HUMAN Ubiquitin thioesterase OTUB1 OS=Homo sapiens OX=9606 GN=OTUB1 PE=1 SV=2 && PF10275:Peptidase C65 Otubain	3.90428	0.00545508	0.12074	up
Cg26026	15.4906	34.4714	6.4168	205.998	20.1285	71.3293	18.793	99.1519	- && sp|Q8K4Q6|NEIL1_MOUSE Endonuclease 8-like 1 OS=Mus musculus OX=10090 GN=Neil1 PE=2 SV=3 && PF01149:Formamidopyrimidine-DNA glycosylase N-terminal domain	-2.39273	0.00547256	0.120946	down
Cg05847	355.093	70.8062	34.223	6.76988	23.9625	55.7517	153.374	28.828	- && sp|Q8NBI5|S43A3_HUMAN Solute carrier family 43 member 3 OS=Homo sapiens OX=9606 GN=SLC43A3 PE=1 SV=2 && -	2.40602	0.0054773	0.120946	up
Cg23903	28.5981	41.9247	11.7641	200.195	37.3814	100.845	27.429	112.807	- && - && -	-2.03687	0.00550707	0.12146	down
Cg30167	5.95794	2.79498	2.13893	26.1124	23.9625	27.056	3.63062	25.7103	- && - && PF12799:Leucine Rich repeats (2 copies)	-2.84069	0.00553601	0.121673	down
Cg07664	38.1308	119.253	37.4314	8.70414	18.2115	18.0373	64.9382	14.9843	- && sp|O60294|TYW4_HUMAN tRNA wybutosine-synthesizing protein 4 OS=Homo sapiens OX=9606 GN=LCMT2 PE=1 SV=3 && PF04072:Leucine carboxyl methyltransferase|PF13418:Galactose oxidase, central domain	2.11638	0.00553614	0.121673	up
novel.6690	3.57476	10.2483	8.55574	91.877	19.17	23.7764	7.45959	44.9411	- && - && -	-2.57874	0.00553621	0.121673	down
Cg27561	169.205	72.6695	140.1	29.0138	64.2194	21.3168	127.325	38.1833	- && - && -	1.73871	0.00555236	0.121885	up
Cg22101	861.518	258.07	1127.22	283.368	171.571	325.491	748.935	260.144	- && - && -	1.52492	0.00558765	0.122516	up
Cg03607	15.4906	2.79498	7.48627	95.7455	4.79249	77.8883	8.59063	59.4754	- && - && -	-2.80555	0.00561149	0.122775	down
Cg22095	1513.32	1171.1	1922.9	599.618	529.091	934.66	1535.77	687.79	- && sp|Q9NZC7|WWOX_HUMAN WW domain-containing oxidoreductase OS=Homo sapiens OX=9606 GN=WWOX PE=1 SV=1 && PF00106:short chain dehydrogenase	1.15856	0.00561499	0.122775	up
Cg17202	311.004	381.049	610.666	244.683	110.227	157.416	434.24	170.776	- && - && -	1.34674	0.005623	0.122775	up
Cg04284	34.556	41.9247	35.2924	132.496	92.9744	91.0064	37.2577	105.492	- && sp|O75095|MEGF6_HUMAN Multiple epidermal growth factor-like domains protein 6 OS=Homo sapiens OX=9606 GN=MEGF6 PE=1 SV=4 && PF07645:Calcium-binding EGF domain|PF14670:Coagulation Factor Xa inhibitory site|PF12662:Complement Clr-like EGF-like	-1.49952	0.0056257	0.122775	down
Cg03579	25.0233	113.663	43.8482	7.73701	5.75099	22.1367	60.8447	11.8749	- && - && -	2.35126	0.00565039	0.123171	up
Cg12432	905.606	543.158	1291.92	446.812	350.811	377.963	913.56	391.862	- && - && -	1.221	0.00566226	0.123283	up
Cg29264	7.14952	94.0977	1.06947	1122.83	49.8419	1792.25	34.1056	988.309	- && sp|P86788|GIGA5_CRAGI Gigasin-5 (Fragment) OS=Crassostrea gigas OX=29159 PE=1 SV=1 && -	-4.85477	0.00566872	0.123283	down
Cg22195	2005.44	1659.29	2735.7	617.027	1299.72	882.188	2133.48	932.98	- && sp|Q15084|PDIA6_HUMAN Protein disulfide-isomerase A6 OS=Homo sapiens OX=9606 GN=PDIA6 PE=1 SV=1 && PF00085:Thioredoxin	1.19327	0.00567802	0.123342	up
Cg18271	20.257	25.1548	80.2101	0	9.58499	6.55902	41.874	5.38134	- && sp|P08228|SODC_MOUSE Superoxide dismutase [Cu-Zn] OS=Mus musculus OX=10090 GN=Sod1 PE=1 SV=2 && PF00080:Copper/zinc superoxide dismutase (SODC)	2.95624	0.00568665	0.123387	up
Cg02356	159.673	95.961	155.073	56.0933	57.5099	35.2547	136.902	49.6193	- && sp|Q7JK24|B3GT1_GORGO Beta-1,3-galactosyltransferase 1 OS=Gorilla gorilla gorilla OX=9595 GN=B3GALT1 PE=3 SV=1 && PF01762:Galactosyltransferase	1.46501	0.00570353	0.123609	up
Cg03996	71.4952	126.706	80.2101	122.825	569.348	196.771	92.8037	296.315	- && - && -	-1.67311	0.00575089	0.124457	down
Cg16889	560.046	531.978	630.986	163.444	344.101	244.323	574.337	250.623	- && - && PF00335:Tetraspanin family	1.19634	0.00576165	0.124457	up
Cg07130	318.154	540.363	676.973	53.1919	109.269	313.193	511.83	158.551	- && sp|O00329|PK3CD_HUMAN Phosphatidylinositol 4,5-bisphosphate 3-kinase catalytic subunit delta isoform OS=Homo sapiens OX=9606 GN=PIK3CD PE=1 SV=2 && PF02192:PI3-kinase family, p85-binding domain|PF00613:Phosphoinositide 3-kinase family, accessory domain (PIK domain)|PF00794:PI3-kinase family, ras-binding domain|PF00792:Phosphoinositide 3-kinase C2|PF00454:Phosphatidylinositol 3- and 4-kinase	1.68933	0.00576256	0.124457	up
Cg04327	51443.2	15800	18185.2	6161.56	12153.8	13021.3	28476.2	10445.5	- && - && -	1.44684	0.00579327	0.124976	up
Cg23002	339.602	107.141	225.658	93.8113	76.6799	69.6896	224.134	80.0602	- && sp|Q3T1J2|MBOA2_RAT Lysophospholipid acyltransferase 2 OS=Rattus norvegicus OX=10116 GN=Mboat2 PE=2 SV=2 && PF03062:MBOAT, membrane-bound O-acyltransferase family	1.48434	0.00580894	0.12517	up
Cg06574	138.224	193.785	135.822	441.01	349.852	282.858	155.944	357.906	- && - && PF05050:Methyltransferase FkbM domain	-1.19719	0.00585296	0.125924	down
novel.6135	0	0	0	29.9809	0	10.6584	0	13.5464	- && - && -	-6.1194	0.00586544	0.125924	down
Cg22152	250.233	100.619	372.175	15.474	6.70949	122.982	241.009	48.3884	- && - && PF00001:7 transmembrane receptor (rhodopsin family)	2.31178	0.00587016	0.125924	up
Cg02570	14.299	5.58996	16.042	0.967126	0	0	11.977	0.322375	- && - && -	5.19259	0.00587085	0.125924	up
Cg10478	51.2383	55.8996	25.6672	56.0933	382.441	87.7269	44.2684	175.42	- && - && -	-1.9855	0.0058906	0.126203	down
Cg05203	0	0	0	0.967126	38.3399	0.819877	0	13.3757	- && sp|Q19673|TYR3_CAEEL Putative tyrosinase-like protein tyr-3 OS=Caenorhabditis elegans OX=6239 GN=tyr-3 PE=3 SV=5 && PF00264:Common central domain of tyrosinase	-6.09993	0.0058998	0.126256	down
novel.6514	0	0	0	26.1124	0	13.9379	0	13.3501	- && - && -	-6.09886	0.00594926	0.127169	down
Cg00066	50.0467	34.4714	69.5154	12.5726	4.79249	17.2174	51.3445	11.5275	- && - && -	2.14812	0.00596459	0.127351	up
Cg17615	6342.82	2991.56	7461.67	1370.42	3376.79	1866.86	5598.69	2204.69	- && - && PF13621:Cupin-like domain	1.34449	0.00597594	0.127448	up
Cg05062	90.5606	163.972	54.5428	244.683	394.901	218.907	103.025	286.164	- && sp|Q3UVX5|GRM5_MOUSE Metabotropic glutamate receptor 5 OS=Mus musculus OX=10090 GN=Grm5 PE=1 SV=2 && PF01094:Receptor family ligand binding region|PF00003:7 transmembrane sweet-taste receptor of 3 GCPR	-1.47144	0.00598571	0.127457	down
Cg06150	688.737	830.11	885.519	1798.85	1787.6	1320.82	801.455	1635.76	- && sp|Q6B857|CFA20_BOVIN Cilia- and flagella-associated protein 20 OS=Bos taurus OX=9913 GN=CFAP20 PE=2 SV=1 && PF05018:Protein of unknown function (DUF667)	-1.02906	0.00599379	0.127457	down
Cg10675	0	0	0	3.86851	23.004	4.91926	0	10.5972	- && - && -	-5.76431	0.00599677	0.127457	down
Cg22765	315.771	386.639	683.39	123.792	108.31	277.938	461.933	170.014	- && sp|Q0VCQ8|P5I11_BOVIN Tumor protein p53-inducible protein 11 OS=Bos taurus OX=9913 GN=TP53I11 PE=2 SV=1 && PF14936:Tumour protein p53-inducible protein 11	1.44084	0.00601181	0.127632	up
Cg25339	2.38317	14.9066	103.738	1.93425	7.66799	2.45963	40.3427	4.02062	- && sp|D3YXG0|HMCN1_MOUSE Hemicentin-1 OS=Mus musculus OX=10090 GN=Hmcn1 PE=1 SV=1 && PF00090:Thrombospondin type 1 domain|PF00057:Low-density lipoprotein receptor domain class A	3.33232	0.00602351	0.127735	up
Cg12192	151.332	170.494	132.614	442.944	257.836	340.249	151.48	347.01	- && sp|Q8CFA2|GCST_MOUSE Aminomethyltransferase, mitochondrial OS=Mus musculus OX=10090 GN=Amt PE=1 SV=1 && PF08669:Glycine cleavage T-protein C-terminal barrel domain|PF01571:Aminomethyltransferase folate-binding domain	-1.1954	0.00603869	0.127912	down
novel.4128	0	0.931661	5.34734	30.948	18.2115	20.4969	2.093	23.2188	- && - && -	-3.46515	0.00606458	0.128316	down
novel.7381	69.1121	50.3097	38.5008	293.039	91.0574	111.503	52.6409	165.2	- && - && -	-1.65086	0.00610218	0.128965	down
novel.566	0	0	1.06947	16.4411	16.2945	5.73914	0.356489	12.8249	- && - && -	-5.07723	0.00611222	0.129032	down
Cg08169	443.27	128.569	187.157	29.9809	108.31	91.8263	252.999	76.7058	- && sp|O73853|CP17A_ICTPU Steroid 17-alpha-hydroxylase/17,20 lyase OS=Ictalurus punctatus OX=7998 GN=cyp17a1 PE=2 SV=1 && PF00067:Cytochrome P450	1.71992	0.00612046	0.129057	up
Cg13529	45.2803	20.4965	25.6672	93.8113	107.352	80.348	30.4814	93.837	- && sp|Q63016|LAT1_RAT Large neutral amino acids transporter small subunit 1 OS=Rattus norvegicus OX=10116 GN=Slc7a5 PE=1 SV=2 && PF13520:Amino acid permease	-1.628	0.00612718	0.129057	down
Cg00991	77.4532	76.3962	53.4734	178.918	174.447	155.777	69.1076	169.714	- && - && -	-1.29597	0.00614508	0.129288	down
Cg10587	164.439	196.58	276.992	26.1124	72.8459	111.503	212.67	70.1539	- && sp|P78509|RELN_HUMAN Reelin OS=Homo sapiens OX=9606 GN=RELN PE=1 SV=3 && -	1.59779	0.00616927	0.129652	up
Cg26593	16.6822	27.0182	18.1809	23.211	256.878	34.4348	20.6271	104.841	- && sp|Q5XGD9|ARI3A_XENTR AT-rich interactive domain-containing protein 3A OS=Xenopus tropicalis OX=8364 GN=arid3a PE=2 SV=1 && PF01388:ARID/BRIGHT DNA binding domain	-2.34201	0.00622176	0.130608	down
novel.3388	127.5	127.637	396.772	87.0414	48.8834	77.8883	217.303	71.271	- && - && PF00643:B-box zinc finger	1.60797	0.00627451	0.131568	up
Cg13188	3.57476	4.6583	1.06947	27.0795	33.5475	13.9379	3.10084	24.855	- && - && -	-2.99293	0.00628472	0.131635	down
Cg27193	1.19159	0.931661	0	24.1782	18.2115	4.91926	0.707749	15.7696	- && sp|O75132|ZBED4_HUMAN Zinc finger BED domain-containing protein 4 OS=Homo sapiens OX=9606 GN=ZBED4 PE=1 SV=2 && PF05699:hAT family C-terminal dimerisation region	-4.48321	0.00631029	0.132022	down
Cg24316	2.38317	0.931661	1.06947	33.8494	6.70949	15.5777	1.46143	18.7122	- && - && PF15233:Synaptonemal complex central element protein 1	-3.70303	0.00636643	0.133049	down
Cg21060	1.19159	2.79498	5.34734	44.4878	14.3775	18.0373	3.1113	25.6342	- && - && -	-3.0328	0.00641876	0.133923	down
Cg29554	35.7476	442.539	96.2521	42.5536	13.419	66.4101	191.513	40.7942	- && sp|P09917|LOX5_HUMAN Polyunsaturated fatty acid 5-lipoxygenase OS=Homo sapiens OX=9606 GN=ALOX5 PE=1 SV=2 && PF00305:Lipoxygenase|PF01477:PLAT/LH2 domain	2.2304	0.00642503	0.133923	up
Cg21958	8.34111	10.2483	10.6947	104.45	8.62649	50.8324	9.76135	54.6362	- && - && -	-2.48256	0.00642975	0.133923	down
novel.5524	0	0	3.2084	1.93425	3.83399	71.3293	1.06947	25.6992	- && - && -	-4.59478	0.00650365	0.135312	down
Cg16031	1.19159	3.72664	0	17.4083	25.8795	17.2174	1.63941	20.1684	- && sp|Q61603|GLRA4_MOUSE Glycine receptor subunit alpha-4 OS=Mus musculus OX=10090 GN=Glra4 PE=1 SV=3 && PF02932:Neurotransmitter-gated ion-channel transmembrane region|PF02931:Neurotransmitter-gated ion-channel ligand binding domain	-3.58099	0.00653374	0.135787	down
Cg30155	208.528	142.544	502.65	104.45	76.6799	118.062	284.574	99.7306	- && - && -	1.51188	0.00657728	0.136384	up
Cg18915	110.818	265.523	182.879	671.186	353.686	386.982	186.407	470.618	- && - && -	-1.33435	0.00658051	0.136384	down
novel.2985	0	0	0	42.5536	0	1.63975	0	14.7311	- && - && -	-6.23929	0.00658429	0.136384	down
Cg03879	196.612	337.261	363.619	20.3097	34.506	182.013	299.164	78.9428	- && - && PF10309:Nuclear cap-binding protein subunit 3	1.91919	0.00661707	0.136911	up
Cg09905	2838.36	1935.99	2217.01	1069.64	869.358	1401.99	2330.45	1113.66	- && sp|Q9CX00|IST1_MOUSE IST1 homolog OS=Mus musculus OX=10090 GN=Ist1 PE=1 SV=1 && PF03398:Regulator of Vps4 activity in the MVB pathway	1.06506	0.00662621	0.136949	up
Cg17438	332.453	329.808	308.007	714.706	1450.21	373.864	323.422	846.26	- && - && -	-1.38746	0.006642	0.137124	down
Cg05217	40.514	73.6012	23.5283	105.417	227.164	105.764	45.8811	146.115	- && sp|P86786|GIGA3_CRAGI Gigasin-3a (Fragment) OS=Crassostrea gigas OX=29159 PE=1 SV=1 && -	-1.66703	0.00668303	0.137819	down
novel.6740	121.542	54.0363	56.6818	359.771	207.036	118.882	77.42	228.563	- && - && -	-1.564	0.00671089	0.138241	down
Cg09428	168.014	133.227	108.016	377.179	246.334	314.833	136.419	312.782	- && sp|Q9H2M3|BHMT2_HUMAN S-methylmethionine--homocysteine S-methyltransferase BHMT2 OS=Homo sapiens OX=9606 GN=BHMT2 PE=1 SV=1 && PF02574:Homocysteine S-methyltransferase	-1.19787	0.00673043	0.138286	down
Cg20884	38.1308	36.3348	13.9031	0	5.75099	4.91926	29.4562	3.55675	- && - && PF06083:Interleukin-17	3.04166	0.00673345	0.138286	up
Cg11985	38.1308	1.86332	0	0	0	0	13.3314	0	- && - && PF03221:Tc5 transposase DNA-binding domain|PF03184:DDE superfamily endonuclease	6.30712	0.00673523	0.138286	up
Cg11600	0	0	1.06947	51.2577	0	4.09939	0.356489	18.4524	- && - && -	-5.60253	0.00675198	0.138434	down
Cg14434	1.19159	2.79498	0	50.2906	1.917	15.5777	1.32886	22.5951	- && - && PF09772:Transmembrane protein 26	-4.05663	0.00675722	0.138434	down
Cg06493	13.1075	5.58996	8.55574	0	0	0	9.08439	0	- && sp|Q8K4Q8|COL12_MOUSE Collectin-12 OS=Mus musculus OX=10090 GN=Colec12 PE=1 SV=1 && PF00059:Lectin C-type domain	5.75556	0.00677645	1	up
Cg29640	2561.91	713.652	32999.5	915.869	1186.62	741.989	12091.7	948.16	- && sp|P61356|RL27_BOVIN 60S ribosomal protein L27 OS=Bos taurus OX=9913 GN=RPL27 PE=2 SV=2 && PF01777:Ribosomal L27e protein family|PF00467:KOW motif	3.67273	0.00679226	0.138993	up
Cg30133	47.6635	45.6514	74.8627	227.275	92.9744	152.497	56.0592	157.582	- && sp|Q63ZL2|HOP2_XENLA Homologous-pairing protein 2 homolog OS=Xenopus laevis OX=8355 GN=psmc3ip PE=2 SV=1 && PF18517:Leucine zipper with capping helix domain|PF07106:TBPIP/Hop2 winged helix domain	-1.49126	0.00679934	0.138993	down
Cg21600	41.7056	66.1479	21.3893	12.5726	0.958499	8.19877	43.0809	7.2433	- && - && PF03104:DNA polymerase family B, exonuclease domain	2.57262	0.00680983	0.139056	up
Cg04657	1071.24	823.588	1174.28	543.525	482.125	487.827	1023.03	504.492	- && sp|P58058|NADK_MOUSE NAD kinase OS=Mus musculus OX=10090 GN=Nadk PE=1 SV=2 && PF01513:ATP-NAD kinase	1.01985	0.00683466	0.139393	up
Cg27329	283.598	36.3348	217.102	36.7508	3.83399	68.0498	179.011	36.2115	- && sp|P98068|SPAN_STRPU Protein SpAN OS=Strongylocentrotus purpuratus OX=7668 GN=SPAN PE=2 SV=1 && PF00051:Kringle domain|PF01400:Astacin (Peptidase family M12A)|PF00084:Sushi repeat (SCR repeat)|PF00431:CUB domain|PF00059:Lectin C-type domain|PF16977:C-terminal domain of apextrin	2.30154	0.00684319	0.139393	up
Cg28412	479.018	829.178	972.146	1245.66	3601.08	1205.22	760.114	2017.32	- && sp|Q9U6D3|CALM_MYXGL Calmodulin OS=Myxine glutinosa OX=7769 PE=2 SV=3 && PF13833:EF-hand domain pair|PF13499:EF-hand domain pair	-1.4079	0.00684868	0.139393	down
Cg12797	0	0	0	23.211	5.75099	2.45963	0	10.4739	- && - && -	-5.7465	0.00685138	1	down
Cg06174	3.57476	27.0182	0	156.674	36.423	36.0746	10.1976	76.3907	- && sp|P24862|CCNB_PATVU G2/mitotic-specific cyclin-B OS=Patella vulgata OX=6465 PE=2 SV=1 && PF02984:Cyclin, C-terminal domain|PF00134:Cyclin, N-terminal domain	-2.88801	0.00686439	0.139561	down
Cg24826	1235.68	931.661	774.294	411.996	530.05	465.69	980.544	469.245	- && - && -	1.06307	0.00688107	0.139748	up
Cg30517	1880.32	920.481	1579.6	756.293	586.601	665.74	1460.14	669.545	- && sp|P11233|RALA_HUMAN Ras-related protein Ral-A OS=Homo sapiens OX=9606 GN=RALA PE=1 SV=1 && PF00071:Ras family	1.12463	0.00689105	0.139799	up
novel.3888	0	0	0	11.6055	10.5435	6.55902	0	9.56934	- && - && -	-5.61747	0.00690488	1	down
Cg07290	235.934	253.412	319.771	49.3234	53.6759	173.814	269.706	92.2711	- && sp|A5D6U8|ACP7_DANRE Acid phosphatase type 7 OS=Danio rerio OX=7955 GN=acp7 PE=2 SV=1 && PF00149:Calcineurin-like phosphoesterase|PF14008:Iron/zinc purple acid phosphatase-like protein C|PF16656:Purple acid Phosphatase, N-terminal domain	1.54472	0.00690657	0.139819	up
Cg22729	156.098	15.8382	69.5154	2.90138	29.7135	9.83853	80.4838	14.1511	- && - && -	2.50739	0.00691893	0.139819	up
novel.170	32.1729	0	5.34734	0	0	0	12.5067	0	- && - && -	6.2148	0.0069242	0.139819	up
Cg14991	23.8317	53.1047	55.6123	92.8441	224.289	97.5654	44.1829	138.233	- && - && PF07679:Immunoglobulin I-set domain|PF13895:Immunoglobulin domain|PF13927:Immunoglobulin domain|PF08205:CD80-like C2-set immunoglobulin domain	-1.64172	0.00692621	0.139819	down
Cg23487	1613.41	1013.65	551.845	377.179	450.494	496.846	1059.63	441.506	- && sp|Q8BU85|MSRB3_MOUSE Methionine-R-sulfoxide reductase B3, mitochondrial OS=Mus musculus OX=10090 GN=Msrb3 PE=1 SV=2 && PF01641:SelR domain	1.26273	0.00693534	0.139819	up
Cg18201	160.864	187.264	190.365	43.5207	19.17	104.944	179.498	55.8783	- && sp|O70496|CLCN7_MOUSE H(+)/Cl(-) exchange transporter 7 OS=Mus musculus OX=10090 GN=Clcn7 PE=1 SV=1 && PF00654:Voltage gated chloride channel	1.68005	0.00693878	0.139819	up
Cg26155	770.957	18.6332	110.155	46.4221	96.8084	20.4969	299.915	54.5758	- && - && -	2.45859	0.00694426	0.139819	up
Cg24367	2.38317	0	7.48627	117.022	0	27.056	3.28982	48.0261	- && sp|Q96DM1|PGBD4_HUMAN PiggyBac transposable element-derived protein 4 OS=Homo sapiens OX=9606 GN=PGBD4 PE=2 SV=3 && PF13843:Transposase IS4	-3.87692	0.0069751	0.140113	down
novel.948	30.9813	23.2915	25.6672	42.5536	242.5	43.4535	26.6467	109.502	- && - && -	-2.03964	0.00698057	0.140113	down
Cg04221	172.78	131.364	232.074	38.6851	39.2984	104.944	178.74	60.9759	- && - && -	1.54781	0.00698176	0.140113	up
Cg01487	875.817	6.52162	74.8627	15.474	0	5.73914	319.067	7.07105	- && - && -	5.49638	0.00699408	0.140113	up
Cg12800	25.0233	18.6332	13.9031	97.6798	55.5929	48.3728	19.1865	67.2151	- && sp|P39022|RAD52_CHICK DNA repair protein RAD52 homolog OS=Gallus gallus OX=9031 GN=RAD52 PE=2 SV=1 && PF04098:Rad52/22 family double-strand break repair protein	-1.81062	0.00700185	0.140113	down
Cg04837	7.14952	15.8382	9.62521	82.2057	11.502	73.789	10.871	55.8322	- && sp|Q6NRV0|TRAIP_XENLA E3 ubiquitin-protein ligase TRAIP OS=Xenopus laevis OX=8355 GN=traip PE=1 SV=2 && PF13639:Ring finger domain	-2.35347	0.00700378	0.140113	down
Cg04387	0	0	6.4168	51.2577	14.3775	16.3975	2.13893	27.3442	- && - && -	-3.67895	0.00701717	0.140161	down
Cg12171	0	0	0	14.5069	0	23.7764	0	12.7611	- && sp|Q1ZXD6|ROCO5_DICDI Probable serine/threonine-protein kinase roco5 OS=Dictyostelium discoideum OX=44689 GN=roco5 PE=3 SV=1 && PF08477:Ras of Complex, Roc, domain of DAPkinase|PF16095:C-terminal of Roc, COR, domain	-6.03547	0.00702234	0.140161	down
Cg17425	114.392	182.605	121.919	38.6851	49.8419	68.0498	139.639	52.1923	- && sp|Q7ZZ00|ZN511_DANRE Zinc finger protein 511 OS=Danio rerio OX=7955 GN=znf511 PE=2 SV=1 && -	1.41893	0.00702864	0.140161	up
novel.145	0	0	0	28.0467	0	10.6584	0	12.9017	- && - && -	-6.04912	0.00704011	0.140241	down
Cg06313	334.836	163.972	437.412	1038.69	652.738	604.25	312.073	765.227	- && - && PF07978:NIPSNAP	-1.29456	0.00711053	0.14141	down
Cg03537	3.57476	0.931661	0	40.6193	7.66799	13.118	1.50214	20.4684	- && - && -	-3.80725	0.00711393	0.14141	down
Cg23648	34.556	83.8495	27.8062	3.86851	19.17	4.09939	48.7372	9.04596	- && - && -	2.43815	0.00715177	0.142012	up
Cg09086	333.644	520.798	117.641	149.905	112.144	49.1926	324.028	103.747	- && sp|Q24307|DIAP2_DROME Death-associated inhibitor of apoptosis 2 OS=Drosophila melanogaster OX=7227 GN=Diap2 PE=1 SV=3 && PF13920:Zinc finger, C3HC4 type (RING finger)|PF00653:Inhibitor of Apoptosis domain	1.6448	0.00716594	0.142142	up
Cg21453	438.504	701.54	894.075	288.204	209.911	378.783	678.04	292.299	- && - && -	1.2137	0.00718821	0.142433	up
novel.5443	166.822	241.3	204.268	24.1782	65.1779	113.963	204.13	67.773	- && - && -	1.58838	0.00720268	0.142569	up
Cg24046	1748.06	654.026	551.845	235.012	522.382	332.87	984.643	363.421	- && sp|Q9SE95|FIP2_ARATH FH protein interacting protein FIP2 OS=Arabidopsis thaliana OX=3702 GN=FIP2 PE=1 SV=1 && PF02214:BTB/POZ domain	1.43768	0.00721189	0.1426	up
Cg09431	3048.08	643.777	597.832	357.837	564.556	478.808	1429.9	467.067	- && sp|Q8VCC1|PGDH_MOUSE 15-hydroxyprostaglandin dehydrogenase [NAD(+)] OS=Mus musculus OX=10090 GN=Hpgd PE=1 SV=1 && PF00106:short chain dehydrogenase|PF04970:Lecithin retinol acyltransferase	1.61391	0.00721983	0.142607	up
Cg24004	2.38317	13.0432	0	69.6331	23.004	30.3355	5.14214	40.9908	- && sp|E7FDB3|NANO1_DANRE Nanos homolog 1 OS=Danio rerio OX=7955 GN=nanos1 PE=2 SV=1 && PF05741:Nanos RNA binding domain	-2.9679	0.00723588	0.142773	down
Cg17598	27.4065	30.7448	40.6398	79.3044	153.36	68.8697	32.9304	100.511	- && - && PF18595:Designed helical repeat protein 10 domain|PF03800:Nuf2 family	-1.60847	0.00725088	0.142897	down
Cg28895	871.05	716.447	895.144	397.489	388.192	452.572	827.547	412.751	- && sp|Q9NWW6|NRK1_HUMAN Nicotinamide riboside kinase 1 OS=Homo sapiens OX=9606 GN=NMRK1 PE=1 SV=1 && PF13238:AAA domain	1.00327	0.00725741	0.142897	up
Cg17439	303.855	280.43	208.546	112.187	104.476	134.46	264.277	117.041	- && sp|P14316|IRF2_HUMAN Interferon regulatory factor 2 OS=Homo sapiens OX=9606 GN=IRF2 PE=1 SV=2 && PF00605:Interferon regulatory factor transcription factor	1.17429	0.0072754	0.143101	up
Cg16621	11267.6	6121.94	7510.87	3183.78	2989.56	5180.8	8300.15	3784.71	- && - && -	1.13286	0.00732529	0.143628	up
novel.1282	0	0	0	0	53.6759	0	0	17.892	- && - && -	-6.52027	0.00733574	0.143628	down
novel.6242	0	0	0	0	53.6759	0	0	17.892	- && - && -	-6.52027	0.00733574	0.143628	down
Cg10505	0	6.52162	0	28.0467	24.921	24.5963	2.17387	25.8546	- && sp|B9EJI9|T229A_MOUSE Transmembrane protein 229A OS=Mus musculus OX=10090 GN=Tmem229a PE=2 SV=1 && PF06541:Putative ABC-transporter type IV	-3.51421	0.00734332	0.143628	down
Cg18716	122.733	39.1297	55.6123	597.684	34.506	277.119	72.4918	303.103	- && sp|P28827|PTPRM_HUMAN Receptor-type tyrosine-protein phosphatase mu OS=Homo sapiens OX=9606 GN=PTPRM PE=1 SV=2 && PF00102:Protein-tyrosine phosphatase	-2.06611	0.00734667	0.143628	down
Cg04785	1464.46	1020.17	997.813	481.629	398.735	721.492	1160.81	533.952	- && sp|Q9VVY3|GBS76_DROME Glycogen-binding subunit 76A OS=Drosophila melanogaster OX=7227 GN=Gbs-76A PE=1 SV=1 && PF03370:Carbohydrate/starch-binding module (family 21)	1.11984	0.00734825	0.143628	up
novel.4152	1.19159	0	0	12.5726	12.4605	10.6584	0.397196	11.8972	- && - && PF00589:Phage integrase family	-4.97048	0.0073849	0.144194	down
Cg07733	114.392	96.8927	7.48627	3.86851	24.921	0.819877	72.9238	9.86978	- && - && -	2.89194	0.00741042	0.144542	up
Cg28217	48.8551	0	0	0	0	0	16.285	0	- && sp|Q21565|AMT3_CAEEL Putative ammonium transporter 3 OS=Caenorhabditis elegans OX=6239 GN=amt-3 PE=3 SV=2 && PF00909:Ammonium Transporter Family	6.59677	0.00743699	0.144731	up
Cg26032	1010.47	1220.48	1296.19	327.856	683.41	598.51	1175.71	536.592	- && sp|Q9D0R2|SYTC_MOUSE Threonine--tRNA ligase 1, cytoplasmic OS=Mus musculus OX=10090 GN=Tars1 PE=1 SV=2 && PF07973:Threonyl and Alanyl tRNA synthetase second additional domain|PF00587:tRNA synthetase class II core domain (G, H, P, S and T)|PF03129:Anticodon binding domain|PF02824:TGS domain	1.13157	0.0074405	0.144731	up
Cg09973	14.299	13.0432	31.0146	67.6988	78.5969	56.5715	19.4523	67.6224	- && - && PF11901:Protein of unknown function (DUF3421)	-1.79807	0.00744328	0.144731	down
Cg23205	26.2149	25.1548	14.9725	4.83563	0.958499	2.45963	22.1141	2.75125	- && sp|Q1EG27|MYO3B_MOUSE Myosin-IIIb OS=Mus musculus OX=10090 GN=Myo3b PE=1 SV=2 && PF00063:Myosin head (motor domain)	3.01024	0.00748611	0.145412	up
Cg22886	1.19159	0	0	23.211	6.70949	7.3789	0.397196	12.4331	- && - && PF10277:Frag1/DRAM/Sfk1 family	-5.03289	0.00750496	0.145627	down
Cg01840	34.556	51.2413	151.864	0	29.7135	3.27951	79.2206	10.9977	- && sp|Q75WF2|DNA2_ACAPL Plancitoxin-1 OS=Acanthaster planci OX=133434 PE=1 SV=1 && PF03265:Deoxyribonuclease II	2.85341	0.00751319	0.145636	up
Cg16877	219.252	265.523	227.797	63.8303	51.7589	150.038	237.524	88.5423	- && sp|Q8TDD5|MCLN3_HUMAN Mucolipin-3 OS=Homo sapiens OX=9606 GN=MCOLN3 PE=1 SV=1 && PF08016:Polycystin cation channel	1.4213	0.00752209	0.145658	up
novel.1422	232.36	423.906	374.314	1307.55	653.696	542.759	343.526	834.67	- && - && -	-1.28	0.00754088	0.145871	down
Cg09824	1.19159	0	3.2084	9.67126	39.2984	10.6584	1.46666	19.876	- && - && PF07969:Amidohydrolase family	-3.78213	0.00757754	0.146429	down
Cg20581	753.083	558.996	774.294	405.226	203.202	332.05	695.458	313.493	- && sp|Q4KLT0|RN217_XENLA Probable E3 ubiquitin-protein ligase RNF217 OS=Xenopus laevis OX=8355 GN=rnf217 PE=2 SV=1 && PF01485:IBR domain, a half RING-finger domain	1.14927	0.00758978	0.146514	up
Cg03164	700.653	555.27	894.075	367.508	332.599	334.51	716.666	344.872	- && sp|P28271|ACOC_MOUSE Cytoplasmic aconitate hydratase OS=Mus musculus OX=10090 GN=Aco1 PE=1 SV=3 && PF00330:Aconitase family (aconitate hydratase)|PF00694:Aconitase C-terminal domain	1.05513	0.00760323	0.146623	up
Cg18930	2.38317	2.79498	0	46.4221	6.70949	12.2982	1.72605	21.8099	- && - && -	-3.6504	0.007663	0.147315	down
Cg14358	2748.99	2381.32	2561.37	1238.89	562.639	1557.77	2563.9	1119.76	- && sp|O35186|CATK_RAT Cathepsin K OS=Rattus norvegicus OX=10116 GN=Ctsk PE=2 SV=1 && PF00112:Papain family cysteine protease|PF08246:Cathepsin propeptide inhibitor domain (I29)	1.19496	0.00766332	0.147315	up
Cg27358	112.009	176.084	217.102	426.503	407.362	316.473	168.398	383.446	- && sp|A0A096MJZ0|DNAL1_RAT Dynein axonemal light chain 1 OS=Rattus norvegicus OX=10116 GN=Dnal1 PE=1 SV=1 && PF14580:Leucine-rich repeat	-1.18599	0.00766337	0.147315	down
Cg09313	1.19159	8.38495	3.2084	18.3754	48.8834	22.9566	4.26164	30.0718	- && - && -	-2.79101	0.00767063	0.147315	down
Cg30653	0	0	0	1.93425	12.4605	15.5777	0	9.9908	- && - && -	-5.68246	0.00767949	1	down
Cg05378	57.1962	0	31.0146	212.768	171.571	89.3666	29.4036	157.902	- && sp|Q8TDB6|DTX3L_HUMAN E3 ubiquitin-protein ligase DTX3L OS=Homo sapiens OX=9606 GN=DTX3L PE=1 SV=1 && PF01661:Macro domain|PF18102:Deltex C-terminal domain|PF13639:Ring finger domain	-2.43142	0.00768842	0.147506	down
Cg26529	504.041	329.808	414.953	1792.09	467.747	955.977	416.268	1071.94	- && sp|A6QQL9|SRP14_BOVIN Signal recognition particle 14 kDa protein OS=Bos taurus OX=9913 GN=SRP14 PE=3 SV=1 && PF02290:Signal recognition particle 14kD protein	-1.36492	0.00771949	0.147756	down
Cg13458	0	0.931661	0	24.1782	6.70949	6.55902	0.310554	12.4822	- && - && -	-5.03836	0.00773344	0.147756	down
Cg04460	1626.52	318.628	979.632	3304.67	2247.68	2348.95	974.926	2633.77	- && - && PF03492:SAM dependent carboxyl methyltransferase	-1.43416	0.00773802	0.147756	down
Cg18517	16.6822	35.4031	9.62521	99.614	57.5099	68.0498	20.5702	75.0579	- && sp|Q5SPC5|OTOF_DANRE Otoferlin OS=Danio rerio OX=7955 GN=otof PE=3 SV=1 && PF16165:Ferlin C-terminus|PF08150:FerB (NUC096) domain|PF08151:FerI (NUC094) domain|PF00168:C2 domain	-1.85941	0.00774943	0.147756	down
Cg19497	17.8738	30.7448	7.48627	81.2386	81.4724	48.3728	18.7016	70.3613	- && sp|P61287|PP1G_BOVIN Serine/threonine-protein phosphatase PP1-gamma catalytic subunit OS=Bos taurus OX=9913 GN=PPP1CC PE=2 SV=1 && PF16891:Serine-threonine protein phosphatase N-terminal domain|PF00149:Calcineurin-like phosphoesterase	-1.90448	0.00775775	0.147756	down
Cg00263	71.4952	62.4213	72.7238	20.3097	25.8795	21.3168	68.8801	22.502	- && sp|V5NAL9|TLR4_PINIB Toll-like receptor 4 OS=Pinctada imbricata OX=66713 PE=2 SV=1 && PF13855:Leucine rich repeat|PF01582:TIR domain	1.61405	0.00777189	0.147756	up
novel.1064	0	0	0	8.70414	0.958499	22.1367	0	10.5998	- && - && -	-5.76892	0.00777326	0.147756	down
Cg04639	67.9205	76.3962	106.947	422.634	92.9744	227.106	83.7545	247.572	- && sp|Q7ZT01|PSF3_XENLA DNA replication complex GINS protein PSF3 OS=Xenopus laevis OX=8355 GN=gins3 PE=1 SV=1 && PF05916:GINS complex protein	-1.56322	0.00777358	0.147756	down
Cg10418	1521.66	1472.96	1874.78	612.191	896.196	897.766	1623.13	802.051	- && sp|O08816|WASL_RAT Neural Wiskott-Aldrich syndrome protein OS=Rattus norvegicus OX=10116 GN=Wasl PE=1 SV=2 && PF00786:P21-Rho-binding domain|PF00568:WH1 domain	1.01689	0.00777459	0.147756	up
Cg11841	19.0654	2.79498	48.126	150.872	72.8459	86.907	23.3288	103.542	- && - && -	-2.154	0.00778039	0.147756	down
Cg16971	299.088	282.293	306.937	121.858	103.518	172.174	296.106	132.517	- && sp|Q5E9A5|GA45B_BOVIN Growth arrest and DNA damage-inducible protein GADD45 beta OS=Bos taurus OX=9913 GN=GADD45B PE=2 SV=1 && -	1.15874	0.00780223	0.147757	up
Cg07771	301.472	161.177	374.314	2.90138	144.733	19.6771	278.987	55.7706	- && - && -	2.32367	0.00780627	0.147757	up
novel.6497	8.34111	0	0	225.34	17.253	91.8263	2.78037	111.473	- && - && -	-5.34689	0.00781116	0.147757	down
Cg22523	17.8738	19.5649	22.4588	110.252	29.7135	77.8883	19.9658	72.6181	- && sp|Q54CS7|JMJCE_DICDI JmjC domain-containing protein E OS=Dictyostelium discoideum OX=44689 GN=jcdE PE=4 SV=2 && PF13621:Cupin-like domain	-1.86228	0.00781199	0.147757	down
Cg28886	32.1729	231.983	91.9742	17.4083	34.506	40.174	118.71	30.6961	- && sp|B3NN96|ASPG2_DROER L-asparaginase-like protein GG20738 OS=Drosophila erecta OX=7220 GN=GG20738 PE=3 SV=1 && PF01112:Asparaginase	1.95184	0.00781988	0.147757	up
novel.1497	112.009	86.6444	159.351	534.821	135.148	332.87	119.335	334.28	- && Q4R5Y4.2 RecName: Full=Selenoprotein H; Short=SelH && -	-1.48654	0.00782898	0.14778	down
Cg20788	4218.22	1175.76	4881.05	489.366	2152.79	337.789	3425.01	993.314	- && sp|A5HNF6|MYD88_CHICK Myeloid differentiation primary response protein MyD88 OS=Gallus gallus OX=9031 GN=MYD88 PE=1 SV=1 && -	1.78586	0.00783688	0.14778	up
Cg28898	1.19159	0	38.5008	0	0	0	13.2308	0	- && - && -	6.30012	0.0078673	0.148029	up
Cg24243	14.299	7.45328	1.06947	22.2439	98.7254	22.1367	7.60727	47.702	- && sp|B0JZG0|S23A2_XENTR Solute carrier family 23 member 2 OS=Xenopus tropicalis OX=8364 GN=slc23a2 PE=2 SV=1 && PF00860:Permease family	-2.65634	0.00788288	0.148029	down
Cg25855	5532.54	4349.92	3855.43	1844.31	1318.89	3049.12	4579.3	2070.78	- && - && -	1.14481	0.00788361	0.148029	up
Cg24655	4243.24	4288.43	4839.34	703.101	1147.32	3186.86	4457.01	1679.1	- && sp|Q1HG43|DOXA1_HUMAN Dual oxidase maturation factor 1 OS=Homo sapiens OX=9606 GN=DUOXA1 PE=1 SV=1 && PF10204:Dual oxidase maturation factor	1.40821	0.00788726	0.148029	up
Cg05410	160.864	192.854	345.438	93.8113	86.2649	104.124	233.052	94.7335	- && sp|Q14667|K0100_HUMAN Protein KIAA0100 OS=Homo sapiens OX=9606 GN=KIAA0100 PE=1 SV=3 && PF10293:Domain of unknown function (DUF2405)|PF10351:Golgi-body localisation protein domain|PF10347:RNA pol II promoter Fmp27 protein domain	1.29847	0.0078896	0.148029	up
Cg16064	94.1354	88.5078	143.309	16.4411	43.1324	46.733	108.651	35.4355	- && sp|Q9GV77|FREM2_LYTVA Extracellular matrix protein 3 OS=Lytechinus variegatus OX=7654 GN=ECM3 PE=1 SV=1 && PF03160:Calx-beta domain|PF16184:Cadherin-like	1.61385	0.00798949	0.149503	up
Cg30483	1607.45	12.1116	7156.88	85.1071	0	40.9939	2925.48	42.0337	- && - && -	6.12095	0.00799208	0.149503	up
Cg19372	15.4906	33.5398	21.3893	8.70414	359.437	40.174	23.4733	136.105	- && sp|P20849|CO9A1_HUMAN Collagen alpha-1(IX) chain OS=Homo sapiens OX=9606 GN=COL9A1 PE=1 SV=3 && PF01391:Collagen triple helix repeat (20 copies)	-2.53209	0.00801359	0.149623	down
Cg07129	182.313	191.922	99.4605	561.9	308.637	287.777	157.898	386.105	- && - && PF05721:Phytanoyl-CoA dioxygenase (PhyH)	-1.28951	0.00802205	0.149623	down
Cg30057	120.35	32.6081	28.8756	135.398	410.237	108.224	60.6114	217.953	- && sp|H2A0M3|AMO_PINMG Putative amine oxidase [copper-containing] OS=Margaritifera margaritifera OX=102329 PE=1 SV=1 && PF01179:Copper amine oxidase, enzyme domain	-1.85002	0.00802324	0.149623	down
Cg16164	0	0.931661	38.5008	0	0	0	13.1442	0	- && sp|P24733|MYS_ARGIR Myosin heavy chain, striated muscle OS=Argopecten irradians OX=31199 PE=1 SV=1 && PF00063:Myosin head (motor domain)	6.29089	0.00803052	0.149623	up
Cg25574	47.6635	0	0	0	0	0	15.8878	0	- && - && -	6.5611	0.00807369	0.150278	up
novel.3966	3.57476	2.79498	8.55574	45.4549	23.9625	20.4969	4.97516	29.9714	- && - && -	-2.59309	0.00814264	0.15135	down
Cg25849	29.7897	49.378	23.5283	147.003	55.5929	119.702	34.232	107.433	- && sp|Q14527|HLTF_HUMAN Helicase-like transcription factor OS=Homo sapiens OX=9606 GN=HLTF PE=1 SV=2 && PF13923:Zinc finger, C3HC4 type (RING finger)|PF08797:HIRAN domain|PF00271:Helicase conserved C-terminal domain|PF00176:SNF2 family N-terminal domain	-1.6465	0.00815397	0.15135	down
novel.325	1.19159	0	0	6.76988	19.17	9.83853	0.397196	11.9261	- && - && -	-4.97386	0.0081619	0.15135	down
Cg18512	986.634	772.347	798.892	297.875	571.265	277.938	852.624	382.36	- && - && -	1.15717	0.0081785	0.15135	up
Cg18897	19.0654	82.9178	53.4734	73.5016	451.453	90.1865	51.8189	205.047	- && - && PF01122:Eukaryotic cobalamin-binding protein	-1.98039	0.00819073	0.15135	down
Cg21747	35.7476	94.0977	77.0017	371.377	89.1404	185.292	68.949	215.27	- && sp|P56931|E2F2_MOUSE Transcription factor E2F2 OS=Mus musculus OX=10090 GN=E2f2 PE=1 SV=2 && PF02319:E2F/DP family winged-helix DNA-binding domain|PF16421:E2F transcription factor CC-MB domain	-1.63965	0.00819171	0.15135	down
Cg26261	228.785	61.4896	9.62521	11.6055	29.7135	16.3975	99.9665	19.2388	- && - && -	2.37634	0.00819712	0.15135	up
novel.1240	10.7243	27.9498	49.1955	5.80276	5.75099	1.63975	29.2899	4.39783	- && - && -	2.74881	0.00820315	0.15135	up
Cg14791	431.355	455.582	152.934	40.6193	72.8459	207.429	346.623	106.965	- && sp|Q7TSF2|VGLU3_RAT Vesicular glutamate transporter 3 OS=Rattus norvegicus OX=10116 GN=Slc17a8 PE=1 SV=2 && PF07690:Major Facilitator Superfamily	1.69426	0.00820401	0.15135	up
Cg08282	4.76635	33.5398	60.9596	6.76988	0.958499	4.91926	33.0886	4.21588	- && sp|A0A0R4IBK5|R213A_DANRE E3 ubiquitin-protein ligase rnf213-alpha OS=Danio rerio OX=7955 GN=rnf213a PE=3 SV=1 && -	2.97222	0.0082147	0.151398	up
Cg06708	14.299	3.72664	8.55574	0	0	0	8.86048	0	- && - && -	5.71855	0.00822852	1	up
Cg26831	207.336	247.822	273.784	890.723	336.433	502.585	242.981	576.58	- && - && PF08615:Ribonuclease H2 non-catalytic subunit (Ylr154p-like)	-1.24631	0.00823238	0.151446	down
Cg23647	9.5327	24.2232	2.13893	0	0	0.819877	11.9649	0.273292	- && - && PF00431:CUB domain	5.19722	0.00825636	0.151718	up
novel.5639	0	0.931661	0	12.5726	12.4605	9.83853	0.310554	11.6239	- && - && -	-4.93676	0.0083108	0.152568	down
Cg25654	3081.44	378.254	1219.19	624.764	580.85	141.839	1559.63	449.151	- && - && -	1.79604	0.00835229	0.15308	up
Cg17122	407.523	376.391	397.842	1211.81	672.866	657.542	393.919	847.406	- && sp|Q32KN5|DNAL4_BOVIN Dynein axonemal light chain 4 OS=Bos taurus OX=9913 GN=DNAL4 PE=3 SV=1 && PF12796:Ankyrin repeats (3 copies)	-1.1051	0.00835859	0.15308	down
novel.3435	0	2.79498	3.2084	43.5207	5.75099	18.8572	2.00113	22.7096	- && - && -	-3.47657	0.00836321	0.15308	down
Cg26769	19.0654	43.788	23.5283	177.951	30.672	113.963	28.7939	107.529	- && sp|Q96BD8|SKA1_HUMAN Spindle and kinetochore-associated protein 1 OS=Homo sapiens OX=9606 GN=SKA1 PE=1 SV=1 && PF07160:Spindle and kinetochore-associated protein 1	-1.89605	0.00837291	0.153108	down
Cg11177	469.485	581.356	619.222	2047.41	558.805	1536.45	556.688	1380.89	- && - && -	-1.31056	0.0083845	0.153171	down
Cg00022	17.8738	38.1981	48.126	64.7975	113.103	146.758	34.7326	108.219	- && - && -	-1.63702	0.00840413	0.153308	down
Cg18608	636.308	595.331	801.031	332.691	292.342	375.504	677.557	333.512	- && - && PF15745:AP-1 complex-associated regulatory protein	1.02231	0.00840843	0.153308	up
novel.4601	32.1729	66.1479	83.4185	423.601	79.5554	120.522	60.5797	207.893	- && - && PF09415:CENP-S associating Centromere protein X	-1.7768	0.00841983	0.153367	down
Cg21457	0	0	1.06947	8.70414	25.8795	3.27951	0.356489	12.621	- && sp|P50549|ETV1_HUMAN ETS translocation variant 1 OS=Homo sapiens OX=9606 GN=ETV1 PE=1 SV=2 && PF00178:Ets-domain|PF04621:PEA3 subfamily ETS-domain transcription factor N terminal domain	-5.05382	0.00844077	0.153599	down
Cg03073	15.4906	26.0865	68.4459	222.439	6.70949	358.286	36.6743	195.812	- && - && PF08192:Peptidase family S64	-2.41646	0.0084502	0.153621	down
Cg00980	102.477	234.778	326.188	21.2768	29.7135	131.18	221.148	60.7235	- && sp|P18433|PTPRA_HUMAN Receptor-type tyrosine-protein phosphatase alpha OS=Homo sapiens OX=9606 GN=PTPRA PE=1 SV=3 && PF00102:Protein-tyrosine phosphatase	1.86153	0.0084711	0.153852	up
Cg23050	0	0	0	6.76988	15.336	5.73914	0	9.28167	- && - && PF02267:ADP-ribosyl cyclase	-5.57334	0.00850702	1	down
Cg19162	1.19159	14.9066	4.27787	22.2439	41.2154	59.0312	6.79201	40.8302	- && sp|Q9ES87|PRSS8_RAT Prostasin OS=Rattus norvegicus OX=10116 GN=Prss8 PE=2 SV=3 && PF01392:Fz domain|PF15494:Scavenger receptor cysteine-rich domain|PF00089:Trypsin|PF00057:Low-density lipoprotein receptor domain class A|PF01390:SEA domain	-2.56446	0.00854462	0.154901	down
Cg04985	258.574	290.678	218.171	26.1124	57.5099	162.336	255.808	81.986	- && sp|Q9CX98|CP2U1_MOUSE Cytochrome P450 2U1 OS=Mus musculus OX=10090 GN=Cyp2u1 PE=2 SV=2 && PF00067:Cytochrome P450	1.6388	0.00855633	0.154901	up
Cg12926	51.2383	64.2846	89.8353	270.795	130.356	140.199	68.4527	180.45	- && sp|Q9D581|EFC10_MOUSE EF-hand calcium-binding domain-containing protein 10 OS=Mus musculus OX=10090 GN=Efcab10 PE=1 SV=1 && PF17819:Family of unknown function (DUF5582)	-1.39721	0.00856506	0.154901	down
Cg04755	2.38317	3.72664	7.48627	29.0138	18.2115	36.0746	4.53203	27.7666	- && sp|E9PVD1|CCD62_MOUSE Coiled-coil domain-containing protein 62 OS=Mus musculus OX=10090 GN=Ccdc62 PE=3 SV=1 && -	-2.61232	0.0085736	0.154901	down
novel.2333	13.1075	5.58996	3.2084	14.5069	158.152	3.27951	7.30194	58.6462	- && - && -	-3.01294	0.00857854	0.154901	down
Cg30461	0	0	0	33.8494	4.79249	0	0	12.8806	- && - && -	-6.04523	0.00858567	0.154901	down
Cg17165	79.8364	83.8495	119.78	279.5	204.16	181.193	94.4887	221.618	- && sp|P35659|DEK_HUMAN Protein DEK OS=Homo sapiens OX=9606 GN=DEK PE=1 SV=1 && PF08766:DEK C terminal domain	-1.22937	0.00859255	0.154901	down
novel.3116	2.38317	0	0	44.4878	0	21.3168	0.794392	21.9349	- && - && -	-4.86522	0.00859503	0.154901	down
Cg15668	14.299	28.8815	18.1809	77.3701	55.5929	68.0498	20.4538	67.0043	- && sp|Q99315|YG31B_YEAST Transposon Ty3-G Gag-Pol polyprotein OS=Saccharomyces cerevisiae (strain ATCC 204508 / S288c) OX=559292 GN=TY3B-G PE=1 SV=3 && PF17919:RNase H-like domain found in reverse transcriptase|PF17921:Integrase zinc binding domain|PF00078:Reverse transcriptase (RNA-dependent DNA polymerase)	-1.70511	0.00860784	0.154982	down
Cg14341	218.06	279.498	376.453	116.055	111.186	156.597	291.337	127.946	- && sp|Q8K0U4|HS12A_MOUSE Heat shock 70 kDa protein 12A OS=Mus musculus OX=10090 GN=Hspa12a PE=1 SV=1 && PF00012:Hsp70 protein	1.18663	0.00861722	0.154996	up
Cg28202	59.5794	57.763	86.6269	341.396	88.1819	163.156	67.9897	197.578	- && sp|Q0II25|POP7_BOVIN Ribonuclease P protein subunit p20 OS=Bos taurus OX=9913 GN=POP7 PE=2 SV=1 && PF12328:Rpp20 subunit of nuclear RNase MRP and P	-1.53889	0.00862514	0.154996	down
Cg05830	782.873	553.406	604.249	308.513	198.409	382.063	646.843	296.328	- && sp|Q9DB30|PHKG2_MOUSE Phosphorylase b kinase gamma catalytic chain, liver/testis isoform OS=Mus musculus OX=10090 GN=Phkg2 PE=2 SV=2 && PF00069:Protein kinase domain	1.12547	0.00863776	0.155074	up
Cg28923	0	0	0	19.3425	1.917	8.19877	0	9.81943	- && - && -	-5.65511	0.00868622	1	down
novel.5870	8.34111	44.7197	39.5703	8.70414	2.8755	0.819877	30.877	4.13317	- && - && -	2.91871	0.00874142	0.156785	up
Cg25103	189.462	163.972	287.687	88.9756	53.6759	112.323	213.707	84.9916	- && - && PF02174:PTB domain (IRS-1 type)|PF00643:B-box zinc finger	1.32868	0.00877689	0.157232	up
Cg16294	835.303	545.953	1392.45	420.7	408.32	400.92	924.567	409.98	- && - && -	1.17309	0.00879135	0.157232	up
Cg28589	8.34111	1.86332	3.2084	33.8494	19.17	30.3355	4.47094	27.785	- && sp|Q9Z309|CIB2_MOUSE Calcium and integrin-binding family member 2 OS=Mus musculus OX=10090 GN=Cib2 PE=1 SV=1 && PF13499:EF-hand domain pair	-2.66002	0.00880153	0.157232	down
Cg04472	2.38317	11.1799	17.1115	112.187	31.6305	21.3168	10.2249	55.0446	- && sp|Q68EF4|GRM4_MOUSE Metabotropic glutamate receptor 4 OS=Mus musculus OX=10090 GN=Grm4 PE=1 SV=2 && PF00003:7 transmembrane sweet-taste receptor of 3 GCPR|PF01094:Receptor family ligand binding region	-2.41964	0.00880206	0.157232	down
Cg30365	0	0.931661	0	18.3754	7.66799	9.01865	0.310554	11.6873	- && - && -	-4.94426	0.00880836	0.157232	down
Cg21955	0	2.79498	1.06947	14.5069	23.9625	13.118	1.28815	17.1958	- && sp|B7Z0W9|OTOP_DROME Proton channel OtopLc OS=Drosophila melanogaster OX=7227 GN=OtopLc PE=3 SV=2 && PF03189:Otopetrin	-3.68193	0.00884426	0.157723	down
Cg24165	2.38317	1.86332	4.27787	22.2439	16.2945	25.4162	2.84146	21.3182	- && sp|Q92113|CP17A_SQUAC Steroid 17-alpha-hydroxylase/17,20 lyase OS=Squalus acanthias OX=7797 GN=CYP17A1 PE=2 SV=1 && PF00067:Cytochrome P450	-2.91311	0.00886819	0.157974	down
Cg30430	34.556	20.4965	7.48627	28.0467	169.654	68.8697	20.8463	88.8569	- && - && PF04199:Putative cyclase	-2.0953	0.00887524	0.157974	down
Cg22866	197.803	184.469	209.616	23.211	56.5514	118.882	197.296	66.2149	- && sp|Q9NZR2|LRP1B_HUMAN Low-density lipoprotein receptor-related protein 1B OS=Homo sapiens OX=9606 GN=LRP1B PE=1 SV=2 && PF00041:Fibronectin type III domain	1.57186	0.00889647	0.158079	up
Cg26983	116.776	122.979	106.947	33.8494	22.0455	63.9504	115.567	39.9484	- && sp|O17583|LIN10_CAEEL Protein lin-10 OS=Caenorhabditis elegans OX=6239 GN=lin-10 PE=1 SV=1 && PF00640:Phosphotyrosine interaction domain (PTB/PID)|PF00595:PDZ domain	1.52862	0.00890206	0.158079	up
Cg29193	107.243	0.931661	78.0711	6.76988	12.4605	7.3789	62.0819	8.86975	- && sp|P70345|B2CL2_MOUSE Bcl-2-like protein 2 OS=Mus musculus OX=10090 GN=Bcl2l2 PE=1 SV=1 && PF02180:Bcl-2 homology region 4|PF00452:Apoptosis regulator proteins, Bcl-2 family	2.80632	0.0089078	0.158079	up
Cg29238	1085.54	772.347	1625.59	301.743	668.074	528.001	1161.16	499.273	- && sp|Q64459|CP3AB_MOUSE Cytochrome P450 3A11 OS=Mus musculus OX=10090 GN=Cyp3a11 PE=1 SV=1 && PF00067:Cytochrome P450	1.21749	0.00891488	0.158079	up
Cg05126	9682.84	6016.66	7667.01	3899.45	2937.8	4647.88	7788.84	3828.38	- && sp|Q9UBQ7|GRHPR_HUMAN Glyoxylate reductase/hydroxypyruvate reductase OS=Homo sapiens OX=9606 GN=GRHPR PE=1 SV=1 && PF02826:D-isomer specific 2-hydroxyacid dehydrogenase, NAD binding domain|PF00389:D-isomer specific 2-hydroxyacid dehydrogenase, catalytic domain	1.02461	0.00892833	0.158167	up
Cg09872	61.9625	127.637	127.267	161.51	545.386	198.41	105.622	301.769	- && - && PF15691:Protein phosphatase 1 regulatory subunit 32	-1.51277	0.00899147	0.159135	down
Cg04176	531.448	429.496	491.955	94.7784	75.7214	340.249	484.299	170.25	- && sp|Q9ULZ9|MMP17_HUMAN Matrix metalloproteinase-17 OS=Homo sapiens OX=9606 GN=MMP17 PE=1 SV=4 && PF00413:Matrixin|PF00045:Hemopexin	1.50647	0.00900976	0.159309	up
Cg21305	21.4486	13.0432	156.142	532.887	52.7174	319.752	63.5447	301.785	- && - && PF00822:PMP-22/EMP/MP20/Claudin family	-2.2481	0.00903882	0.159672	down
Cg16205	2086.47	579.493	990.327	631.533	443.785	368.945	1218.76	481.421	- && - && -	1.3399	0.00907202	0.160068	up
Cg11768	2.38317	12.1116	3.2084	12.5726	71.8874	29.5156	5.90105	37.9919	- && - && -	-2.66505	0.00907837	0.160068	down
Cg24333	264.532	375.459	198.921	1392.66	280.84	655.902	279.638	776.468	- && sp|Q49AM3|TTC31_HUMAN Tetratricopeptide repeat protein 31 OS=Homo sapiens OX=9606 GN=TTC31 PE=1 SV=3 && PF00226:DnaJ domain|PF00076:RNA recognition motif. (a.k.a. RRM, RBD, or RNP domain)	-1.47289	0.00913943	0.160944	down
Cg20027	382.5	466.762	467.357	165.379	211.828	250.882	438.873	209.363	- && sp|Q9V3J1|VATH_DROME V-type proton ATPase subunit H OS=Drosophila melanogaster OX=7227 GN=VhaSFD PE=2 SV=2 && PF11698:V-ATPase subunit H|PF03224:V-ATPase subunit H	1.06747	0.00915502	0.160944	up
novel.2071	33.3644	6.52162	11.7641	0	2.8755	0	17.2167	0.958499	- && - && -	4.19269	0.00916241	0.160944	up
Cg17163	201.378	290.678	51.3344	756.293	236.749	692.796	181.13	561.946	- && sp|P07201|RIR2_SPISO Ribonucleoside-diphosphate reductase small chain OS=Spisula solidissima OX=6584 PE=2 SV=2 && PF00268:Ribonucleotide reductase, small chain	-1.63284	0.00918784	0.161141	down
Cg19964	321.729	576.698	332.604	146.036	136.107	244.323	410.344	175.489	- && sp|Q0VA77|ENPP4_XENTR Bis(5'-adenosyl)-triphosphatase enpp4 OS=Xenopus tropicalis OX=8364 GN=enpp4 PE=2 SV=1 && PF01663:Type I phosphodiesterase / nucleotide pyrophosphatase	1.22511	0.00919276	0.161141	up
Cg26992	2950.37	983.834	7418.9	1448.76	115.02	1317.54	3784.37	960.439	- && - && PF02221:ML domain	1.9782	0.00919947	0.161141	up
novel.6317	40.514	2.79498	23.5283	222.439	17.253	107.404	22.2791	115.699	- && - && -	-2.38417	0.00924537	0.161312	down
novel.3848	40.514	15.8382	22.4588	259.19	7.66799	121.342	26.2703	129.4	- && - && -	-2.30403	0.00925646	0.161312	down
Cg08341	0	0	0	5.80276	0	31.1553	0	12.3194	- && sp|Q9V8M2|C12B2_DROME Probable cytochrome P450 12b2, mitochondrial OS=Drosophila melanogaster OX=7227 GN=Cyp12b2 PE=2 SV=2 && PF00067:Cytochrome P450	-5.98592	0.00926486	0.161312	down
Cg13093	3126.73	1321.09	2181.71	707.936	1384.07	768.225	2209.84	953.411	- && - && PF05760:Immediate early response protein (IER)	1.2127	0.00926513	0.161312	up
novel.2950	0	0	0	0	36.423	2.45963	0	12.9609	- && - && -	-6.05488	0.00927736	0.161312	down
Cg27743	26.2149	9.31661	11.7641	0	0	2.45963	15.7652	0.819877	- && - && -	4.19471	0.00928058	0.161312	up
Cg27467	50.0467	163.972	140.1	504.84	193.617	288.597	118.04	329.018	- && sp|Q9BQT8|ODC_HUMAN Mitochondrial 2-oxodicarboxylate carrier OS=Homo sapiens OX=9606 GN=SLC25A21 PE=1 SV=1 && PF00153:Mitochondrial carrier protein	-1.47662	0.00928233	0.161312	down
Cg14715	89.369	75.4645	53.4734	175.05	241.542	127.081	72.769	181.224	- && sp|A2ASS6|TITIN_MOUSE Titin OS=Mus musculus OX=10090 GN=Ttn PE=1 SV=1 && PF07679:Immunoglobulin I-set domain	-1.31656	0.00928496	0.161312	down
novel.4572	17.8738	68.9429	10.6947	5.80276	5.75099	0	32.5038	3.85125	- && - && -	3.09689	0.00928675	0.161312	up
Cg06974	380.116	446.265	472.705	156.674	228.123	233.665	433.029	206.154	- && sp|A1A4J6|ATP9B_BOVIN Probable phospholipid-transporting ATPase IIB OS=Bos taurus OX=9913 GN=ATP9B PE=2 SV=1 && PF16212:Phospholipid-translocating P-type ATPase C-terminal|PF00122:E1-E2 ATPase|PF13246:Cation transport ATPase (P-type)|PF16209:Phospholipid-translocating ATPase N-terminal	1.07052	0.0093292	0.161899	up
Cg11098	586.261	815.203	1368.92	144.102	416.947	497.666	923.461	352.905	- && sp|Q8IZD9|DOCK3_HUMAN Dedicator of cytokinesis protein 3 OS=Homo sapiens OX=9606 GN=DOCK3 PE=1 SV=1 && PF07653:Variant SH3 domain|PF06920:Dock homology region 2|PF16172:DOCK N-terminus|PF14429:C2 domain in Dock180 and Zizimin proteins	1.38743	0.00936208	0.162217	up
Cg01087	19.0654	30.7448	28.8756	6.76988	0	3.27951	26.2286	3.3498	- && - && -	2.97182	0.00936497	0.162217	up
Cg22640	0	4.6583	4.27787	5.80276	60.3854	19.6771	2.97872	28.6217	- && - && PF00822:PMP-22/EMP/MP20/Claudin family	-3.23933	0.00937348	0.162217	down
Cg27895	57.1962	95.0294	712.265	101.548	43.1324	67.2299	288.164	70.6369	- && sp|Q8R4P9|MRP7_MOUSE ATP-binding cassette sub-family C member 10 OS=Mus musculus OX=10090 GN=Abcc10 PE=1 SV=1 && PF00664:ABC transporter transmembrane region|PF00005:ABC transporter	2.02857	0.00939339	0.162288	up
Cg03500	160.864	221.735	220.31	429.404	403.528	411.578	200.97	414.837	- && - && PF15715:PCNA-associated factor histone like domain	-1.04477	0.00939492	0.162288	down
Cg06021	1.19159	0.931661	3.2084	19.3425	30.672	6.55902	1.77722	18.8578	- && - && -	-3.41051	0.00941886	0.162551	down
novel.4304	17.8738	62.4213	60.9596	121.858	244.417	85.2672	47.0849	150.514	- && - && -	-1.67193	0.00943206	0.162629	down
Cg23257	2.38317	2.79498	4.27787	27.0795	3.83399	47.5529	3.15201	26.1555	- && sp|Q9WTW8|S23A2_RAT Solute carrier family 23 member 2 OS=Rattus norvegicus OX=10116 GN=Slc23a2 PE=1 SV=2 && PF00860:Permease family	-3.05356	0.00948821	0.163369	down
Cg27468	8.34111	12.1116	7.48627	69.6331	11.502	55.7517	9.31299	45.6289	- && - && -	-2.28854	0.0094999	0.163369	down
Cg20317	284.789	348.441	472.705	45.4549	147.609	208.249	368.645	133.771	- && sp|Q9VX32|RG190_DROME Rho GTPase-activating protein 190 OS=Drosophila melanogaster OX=7227 GN=RhoGAPp190 PE=1 SV=2 && PF16512:p190-A and -B Rho GAPs FF domain|PF00071:Ras family|PF00620:RhoGAP domain	1.46129	0.00950741	0.163369	up
Cg18356	45.2803	51.2413	20.3199	5.80276	3.83399	13.9379	38.9472	7.85822	- && sp|Q9Y5X5|NPFF2_HUMAN Neuropeptide FF receptor 2 OS=Homo sapiens OX=9606 GN=NPFFR2 PE=1 SV=2 && PF00001:7 transmembrane receptor (rhodopsin family)	2.29885	0.00950988	0.163369	up
Cg10551	21.4486	57.763	29.9451	191.491	51.7589	117.242	36.3855	120.164	- && sp|Q28CQ7|SUV92_XENTR Histone-lysine N-methyltransferase SUV39H2 OS=Xenopus tropicalis OX=8364 GN=suv39h2 PE=2 SV=2 && PF00856:SET domain|PF05033:Pre-SET motif|PF00385:Chromo (CHRromatin Organisation MOdifier) domain	-1.71818	0.00952046	0.163401	down
Cg16732	8.34111	23.2915	24.5977	2.90138	1.917	1.63975	18.7435	2.15271	- && - && -	3.13178	0.00953862	0.163563	up
Cg24475	0	0	1.06947	9.67126	18.2115	6.55902	0.356489	11.4806	- && - && -	-4.91796	0.00956947	0.163942	down
Cg14003	110.818	148.134	101.599	350.1	208.953	258.261	120.184	272.438	- && sp|O08688|CAN5_MOUSE Calpain-5 OS=Mus musculus OX=10090 GN=Capn5 PE=1 SV=1 && PF01067:Calpain large subunit, domain III|PF00648:Calpain family cysteine protease|PF00168:C2 domain	-1.17947	0.00958759	0.164021	down
Cg10646	0	5.58996	1.06947	0	114.061	4.91926	2.21981	39.6602	- && sp|Q9PTS8|ACHA9_CHICK Neuronal acetylcholine receptor subunit alpha-9 OS=Gallus gallus OX=9031 GN=CHRNA9 PE=1 SV=1 && PF02931:Neurotransmitter-gated ion-channel ligand binding domain|PF02932:Neurotransmitter-gated ion-channel transmembrane region	-4.12429	0.00959159	0.164021	down
Cg26020	9.5327	26.0865	63.0986	164.411	75.7214	109.864	32.9059	116.665	- && sp|Q7TN88|PK1L2_MOUSE Polycystic kidney disease protein 1-like 2 OS=Mus musculus OX=10090 GN=Pkd1l2 PE=2 SV=1 && PF02210:Laminin G domain|PF01477:PLAT/LH2 domain|PF08016:Polycystin cation channel|PF01825:GPCR proteolysis site, GPS, motif|PF02010:REJ domain	-1.82357	0.00962195	0.164311	down
Cg04770	13.1075	15.8382	27.8062	96.7126	32.589	74.6088	18.9173	67.9701	- && sp|P22935|RABP2_MOUSE Cellular retinoic acid-binding protein 2 OS=Mus musculus OX=10090 GN=Crabp2 PE=2 SV=2 && PF00061:Lipocalin / cytosolic fatty-acid binding protein family	-1.84448	0.00962615	0.164311	down
Cg07205	2312.87	819.861	728.307	685.693	453.37	375.504	1287.01	504.855	- && - && -	1.34999	0.00969543	0.165343	up
Cg08673	59.5794	211.487	31.0146	23.211	32.589	23.7764	100.694	26.5255	- && - && -	1.92758	0.00971825	0.165403	up
Cg22901	39.3224	13.0432	35.2924	1.93425	7.66799	4.91926	29.2194	4.8405	- && - && -	2.58975	0.0097252	0.165403	up
Cg28343	22.6402	20.4965	31.0146	80.2715	40.2569	120.522	24.7171	80.3501	- && sp|Q9JJ00|PLS1_MOUSE Phospholipid scramblase 1 OS=Mus musculus OX=10090 GN=Plscr1 PE=1 SV=1 && PF03803:Scramblase	-1.70301	0.00972543	0.165403	down
Cg19433	107.243	75.4645	44.9176	156.674	317.263	140.199	75.875	204.712	- && sp|Q5H8C1|FREM1_HUMAN FRAS1-related extracellular matrix protein 1 OS=Homo sapiens OX=9606 GN=FREM1 PE=1 SV=3 && PF16184:Cadherin-like|PF03160:Calx-beta domain|PF00059:Lectin C-type domain	-1.43287	0.00974829	0.165641	down
Cg24430	5.95794	19.5649	8.55574	106.384	9.58499	61.4908	11.3595	59.1532	- && sp|Q6NS60|FBX41_MOUSE F-box only protein 41 OS=Mus musculus OX=10090 GN=Fbxo41 PE=1 SV=3 && PF12937:F-box-like	-2.37026	0.00975929	0.165678	down
novel.1267	0	0	0	6.76988	12.4605	7.3789	0	8.86975	- && - && -	-5.50851	0.00977322	1	down
Cg08705	36.9392	27.9498	26.7367	0.967126	0.958499	10.6584	30.5419	4.19468	- && - && PF00386:C1q domain	2.83748	0.0097847	0.165942	up
Cg19991	210.911	254.343	267.367	55.1262	163.903	50.0125	244.207	89.6807	- && sp|Q9DDJ0|UBC9B_DANRE SUMO-conjugating enzyme UBC9-B OS=Danio rerio OX=7955 GN=ube2ib PE=1 SV=1 && PF00179:Ubiquitin-conjugating enzyme	1.44679	0.00980059	0.165942	up
novel.2522	1.19159	4.6583	1.06947	25.1453	21.087	14.7578	2.30645	20.33	- && - && -	-3.10588	0.00980145	0.165942	down
Cg23153	0	0	0	20.3097	3.83399	4.09939	0	9.41434	- && - && -	-5.59311	0.00983376	1	down
Cg12956	98.9017	78.2595	167.906	26.1124	46.0079	0.819877	115.023	24.3134	- && sp|Q9BDB7|IF44L_MOUSE Interferon-induced protein 44-like OS=Mus musculus OX=10090 GN=Ifi44l PE=2 SV=2 && PF07534:TLD	2.24667	0.00985105	0.166631	up
Cg06129	692.312	927.934	959.312	362.672	393.943	518.982	859.853	425.199	- && sp|Q2HJG5|VPS35_BOVIN Vacuolar protein sorting-associated protein 35 OS=Bos taurus OX=9913 GN=VPS35 PE=2 SV=1 && PF03635:Vacuolar protein sorting-associated protein 35	1.0158	0.00987438	0.166875	up
novel.4756	0	40.0614	3.2084	210.834	16.2945	91.0064	14.4233	106.045	- && - && -	-2.86491	0.00990622	0.167253	down
novel.6551	0	0	0	14.5069	0.958499	13.9379	0	9.8011	- && - && -	-5.65412	0.00991006	1	down
novel.662	5.95794	0	1.06947	58.9947	0	42.6336	2.34247	33.8761	- && - && -	-3.89166	0.00992211	0.167253	down
Cg08161	9.5327	10.2483	0	52.2248	47.9249	22.1367	6.59365	40.7621	- && - && PF00643:B-box zinc finger	-2.62469	0.00993707	0.167253	down
Cg24630	66.7289	56.8313	60.9596	21.2768	14.3775	22.9566	61.5066	19.5369	- && - && -	1.65208	0.00993975	0.167253	up
Cg17468	0	10.2483	14.9725	33.8494	101.601	22.1367	8.40694	52.529	- && sp|P42325|NCAH_DROME Neurocalcin homolog OS=Drosophila melanogaster OX=7227 GN=Nca PE=1 SV=2 && PF13499:EF-hand domain pair|PF13833:EF-hand domain pair	-2.63187	0.00994137	0.167253	down
Cg12591	32.1729	54.968	44.9176	0	0	14.7578	44.0195	4.91926	- && sp|Q9LZF7|OTU10_ARATH OVARIAN TUMOR DOMAIN-containing deubiquitinating enzyme 10 OS=Arabidopsis thaliana OX=3702 GN=OTU10 PE=1 SV=1 && PF02338:OTU-like cysteine protease|PF03281:Mab-21 protein	3.13842	0.00995987	0.1673	up
Cg04727	109.626	98.756	73.7932	206.965	349.852	143.479	94.0584	233.432	- && sp|Q9Y6J8|STYL1_HUMAN Serine/threonine/tyrosine-interacting-like protein 1 OS=Homo sapiens OX=9606 GN=STYXL1 PE=1 SV=1 && PF00581:Rhodanese-like domain|PF00782:Dual specificity phosphatase, catalytic domain	-1.31113	0.00996677	0.1673	down
Cg12319	69.1121	100.619	96.2521	13.5398	42.1739	30.3355	88.6612	28.6831	- && sp|Q24118|PIGE_DROME Protein pigeon OS=Drosophila melanogaster OX=7227 GN=pigeon PE=2 SV=2 && PF14959:gamma-Secretase-activating protein C-term	1.62828	0.00997097	0.1673	up
Cg11131	46.4719	58.6946	60.9596	178.918	106.393	128.721	55.3754	138.011	- && sp|Q96C86|DCPS_HUMAN m7GpppX diphosphatase OS=Homo sapiens OX=9606 GN=DCPS PE=1 SV=2 && PF11969:Scavenger mRNA decapping enzyme C-term binding|PF05652:Scavenger mRNA decapping enzyme (DcpS) N-terminal	-1.316	0.00998942	0.167346	down
Cg09141	19240.6	16158.7	25604.1	7825.02	9014.68	13127.9	20334.5	9989.19	- && sp|Q6NUC1|CNFNA_XENLA Cornifelin homolog A OS=Xenopus laevis OX=8355 GN=cnfn-a PE=3 SV=1 && PF04749:PLAC8 family	1.02546	0.00999298	0.167346	up
Cg27799	131.075	294.405	143.309	671.186	234.832	568.175	189.596	491.398	- && - && PF00582:Universal stress protein family	-1.37265	0.0100101	0.167346	down
Cg29374	239.509	208.692	254.533	92.8441	113.103	118.062	234.245	108.003	- && sp|Q54RB7|SHKA_DICDI Dual specificity protein kinase shkA OS=Dictyostelium discoideum OX=44689 GN=shkA PE=2 SV=1 && PF00069:Protein kinase domain|PF00350:Dynamin family	1.11621	0.0100117	0.167346	up
Cg11066	6073.52	9161.95	10898.9	4818.22	3143.88	4738.07	8711.47	4233.39	- && sp|Q14624|ITIH4_HUMAN Inter-alpha-trypsin inhibitor heavy chain H4 OS=Homo sapiens OX=9606 GN=ITIH4 PE=1 SV=4 && PF08487:Vault protein inter-alpha-trypsin domain|PF00092:von Willebrand factor type A domain	1.04111	0.0100184	0.167346	up
Cg10239	63.1541	43.788	34.223	172.148	114.061	91.8263	47.055	126.012	- && sp|P20241|NRG_DROME Neuroglian OS=Drosophila melanogaster OX=7227 GN=Nrg PE=1 SV=2 && PF07679:Immunoglobulin I-set domain|PF00041:Fibronectin type III domain	-1.4227	0.0101068	0.168567	down
Cg05166	399.182	379.186	249.186	113.154	135.148	204.969	342.518	151.09	- && - && PF00001:7 transmembrane receptor (rhodopsin family)	1.17964	0.0101095	0.168567	up
novel.3065	0	43.788	0	0	0	0	14.596	0	- && Q9GUM2.1 RecName: Full=Beta-1,4-N-acetylgalactosaminyltransferase bre-4; AltName: Full=Bacillus thuringiensis toxin-resistant protein 4; Short=Bt toxin-resistant protein 4; AltName: Full=Beta-4-GalNAcT && PF02709:N-terminal domain of galactosyltransferase|PF13733:N-terminal region of glycosyl transferase group 7	6.44578	0.0101374	0.168882	up
Cg26659	341.986	210.555	449.176	128.628	162.945	150.038	333.906	147.203	- && sp|Q9UDY8|MALT1_HUMAN Mucosa-associated lymphoid tissue lymphoma translocation protein 1 OS=Homo sapiens OX=9606 GN=MALT1 PE=1 SV=1 && PF13895:Immunoglobulin domain|PF13927:Immunoglobulin domain|PF00656:Caspase domain	1.18103	0.0101502	0.168944	up
Cg15076	9.5327	4.6583	10.6947	0	0	0	8.29523	0	- && sp|O14522|PTPRT_HUMAN Receptor-type tyrosine-protein phosphatase T OS=Homo sapiens OX=9606 GN=PTPRT PE=1 SV=6 && PF00102:Protein-tyrosine phosphatase	5.62509	0.0101564	1	up
Cg28538	650.607	423.906	579.651	263.058	240.583	302.535	551.388	268.725	- && - && -	1.03626	0.0101688	0.169103	up
Cg27115	134.649	118.321	102.669	24.1782	39.2984	64.7703	118.546	42.749	- && sp|O45782|ARD17_CAEEL Arrestin domain-containing protein 17 OS=Caenorhabditis elegans OX=6239 GN=arrd-17 PE=1 SV=2 && PF00339:Arrestin (or S-antigen), N-terminal domain|PF02752:Arrestin (or S-antigen), C-terminal domain	1.46769	0.0102135	0.169559	up
Cg21624	233.551	65.2162	172.184	755.326	652.738	114.783	156.984	507.615	- && sp|H2A0L6|HEX_PINMG Putative beta-hexosaminidase OS=Margaritifera margaritifera OX=102329 PE=1 SV=1 && PF02838:Glycosyl hydrolase family 20, domain 2|PF03173:Putative carbohydrate binding domain|PF00728:Glycosyl hydrolase family 20, catalytic domain	-1.69414	0.0102243	0.169559	down
Cg26067	127.5	91.3027	40.6398	14.5069	12.4605	43.4535	86.4808	23.4736	- && - && PF00858:Amiloride-sensitive sodium channel	1.87434	0.0102249	0.169559	up
Cg11311	339.602	732.285	760.391	112.187	255.919	349.268	610.76	239.125	- && sp|Q05209|PTN12_HUMAN Tyrosine-protein phosphatase non-receptor type 12 OS=Homo sapiens OX=9606 GN=PTPN12 PE=1 SV=3 && PF00102:Protein-tyrosine phosphatase	1.35248	0.0102443	0.169606	up
Cg05730	45.2803	50.3097	59.8902	61.8961	286.591	123.801	51.8267	157.43	- && sp|Q6IMH0|TEPP_MOUSE Testis, prostate and placenta-expressed protein OS=Mus musculus OX=10090 GN=Tepp PE=2 SV=1 && -	-1.60231	0.010274	0.169625	down
Cg14705	117.967	175.152	229.935	359.771	627.817	268.92	174.352	418.836	- && sp|Q8WXX0|DYH7_HUMAN Dynein axonemal heavy chain 7 OS=Homo sapiens OX=9606 GN=DNAH7 PE=1 SV=2 && PF17852:Dynein heavy chain AAA lid domain|PF12774:Hydrolytic ATP binding site of dynein motor region|PF03028:Dynein heavy chain region D6 P-loop domain|PF12781:ATP-binding dynein motor region|PF18199:Dynein heavy chain C-terminal domain|PF12780:P-loop containing dynein motor region D4|PF08393:Dyn…	-1.26344	0.0102787	0.169625	down
Cg22030	117.967	58.6946	88.7658	25.1453	41.2154	23.7764	88.4759	30.0457	- && - && -	1.55789	0.0102797	0.169625	up
novel.2530	0	0	0	25.1453	0	9.83853	0	11.6613	- && - && -	-5.9033	0.0102817	0.169625	down
Cg27542	84.6027	114.594	65.2375	209.866	231.957	172.174	88.1448	204.666	- && sp|Q9GL21|UACA_CANLF Uveal autoantigen with coiled-coil domains and ankyrin repeats OS=Canis lupus familiaris OX=9615 GN=UACA PE=2 SV=2 && PF12796:Ankyrin repeats (3 copies)	-1.21345	0.0103022	0.169813	down
novel.489	816.237	286.951	550.776	1544.5	1533.6	837.915	551.321	1305.34	- && - && -	-1.24399	0.0103165	0.1699	down
novel.1896	264.532	7.45328	53.4734	15.474	34.506	9.83853	108.486	19.9395	- && - && -	2.44415	0.0103344	0.169972	up
Cg14793	20.257	33.5398	27.8062	118.957	60.3854	67.2299	27.201	82.1906	- && sp|Q68G38|TOR1A_RAT Torsin-1A OS=Rattus norvegicus OX=10116 GN=Tor1a PE=1 SV=1 && PF06309:Torsin	-1.59085	0.0103607	0.169972	down
Cg20313	214.486	231.983	257.742	126.694	114.061	68.8697	234.737	103.208	- && sp|Q32KI9|ARSI_MOUSE Arylsulfatase I OS=Mus musculus OX=10090 GN=Arsi PE=2 SV=1 && PF00884:Sulfatase	1.18704	0.0103771	0.169972	up
novel.2190	233.551	91.3027	40.6398	27.0795	50.8004	27.8758	121.831	35.2519	- && - && -	1.78845	0.0103771	0.169972	up
Cg09184	2442.75	3096.84	4223.33	1500.98	1386.95	1951.31	3254.31	1613.08	- && sp|P35992|PTP10_DROME Tyrosine-protein phosphatase 10D OS=Drosophila melanogaster OX=7227 GN=Ptp10D PE=1 SV=4 && PF00102:Protein-tyrosine phosphatase	1.01249	0.0103807	0.169972	up
Cg06943	406.331	400.614	484.469	118.957	160.069	285.317	430.471	188.114	- && - && PF12540:Protein of unknown function (DUF3736)	1.19307	0.0103909	0.169972	up
Cg26049	424.205	367.074	355.063	1275.64	549.22	700.995	382.114	841.951	- && - && PF10572:UPF0556 domain	-1.13979	0.0104003	0.169972	down
Cg07897	912.756	898.121	980.702	329.79	266.463	655.902	930.526	417.385	- && sp|Q6NXD2|CHM2B_DANRE Charged multivesicular body protein 2b OS=Danio rerio OX=7955 GN=chmp2b PE=2 SV=1 && PF03357:Snf7	1.15602	0.010411	0.169972	up
Cg22018	1214.23	1341.59	1138.98	430.371	664.24	739.529	1231.6	611.38	- && - && PF00418:Tau and MAP protein, tubulin-binding repeat	1.01022	0.0104117	0.169972	up
novel.4577	187.079	105.278	126.197	39.6522	72.8459	49.1926	139.518	53.8969	- && - && -	1.3713	0.0104267	0.17007	up
Cg29566	1.19159	8.38495	4.27787	10.6384	63.2609	22.1367	4.61813	32.012	- && - && -	-2.77051	0.0104459	0.17009	down
Cg17766	7.14952	4.6583	6.4168	27.0795	40.2569	22.9566	6.07488	30.0977	- && sp|A4D2P6|GRD2I_HUMAN Delphilin OS=Homo sapiens OX=9606 GN=GRID2IP PE=3 SV=2 && PF02181:Formin Homology 2 Domain|PF17820:PDZ domain	-2.31424	0.0104554	0.17009	down
Cg05386	290.747	538.5	545.428	173.116	201.285	250.063	458.225	208.154	- && sp|Q5E9F9|PRS7_BOVIN 26S proteasome regulatory subunit 7 OS=Bos taurus OX=9913 GN=PSMC2 PE=2 SV=3 && PF17862:AAA+ lid domain|PF00004:ATPase family associated with various cellular activities (AAA)	1.13844	0.0104594	0.17009	up
Cg29849	0	1.86332	0	21.2768	10.5435	10.6584	0.621107	14.1596	- && - && -	-4.41189	0.0104809	0.17009	down
Cg10205	359.859	171.426	265.228	88.0085	115.02	136.1	265.504	113.043	- && - && PF15795:Ectodermal ciliogenesis protein	1.23009	0.0104825	0.17009	up
Cg14214	707.803	859.923	974.285	212.768	587.56	87.7269	847.337	296.018	- && - && -	1.51791	0.0105247	0.170543	up
Cg10045	316.962	222.667	380.73	32.8823	43.1324	208.249	306.786	94.7545	- && sp|Q24307|DIAP2_DROME Death-associated inhibitor of apoptosis 2 OS=Drosophila melanogaster OX=7227 GN=Diap2 PE=1 SV=3 && PF13920:Zinc finger, C3HC4 type (RING finger)|PF00653:Inhibitor of Apoptosis domain	1.69202	0.0105286	0.170543	up
Cg20168	350.327	185.4	216.032	97.6798	107.352	122.982	250.587	109.338	- && sp|Q5RFZ7|F167A_DANRE Protein FAM167A OS=Danio rerio OX=7955 GN=fam167a PE=2 SV=1 && PF11652:FAM167	1.19497	0.0105423	0.170577	up
Cg18437	1213.04	1051.84	1099.41	425.536	479.249	747.728	1121.43	550.838	- && sp|Q2KIR8|TDH_BOVIN L-threonine 3-dehydrogenase, mitochondrial OS=Bos taurus OX=9913 GN=TDH PE=2 SV=1 && PF01370:NAD dependent epimerase/dehydratase family	1.02518	0.0105524	0.170577	up
Cg30450	5834.01	5700.83	3682.18	1649.92	2125.95	3381.99	5072.34	2385.95	- && sp|P34826|EF1B_RABIT Elongation factor 1-beta OS=Oryctolagus cuniculus OX=9986 GN=EEF1B PE=1 SV=2 && PF00736:EF-1 guanine nucleotide exchange domain|PF10587:Eukaryotic elongation factor 1 beta central acidic region	1.08799	0.0105652	0.170577	up
Cg20582	2496.38	1231.66	2049.1	893.625	909.615	1005.17	1925.71	936.137	- && sp|O95238|SPDEF_HUMAN SAM pointed domain-containing Ets transcription factor OS=Homo sapiens OX=9606 GN=SPDEF PE=1 SV=1 && PF00178:Ets-domain|PF02198:Sterile alpha motif (SAM)/Pointed domain	1.04037	0.0105805	0.170577	up
Cg25718	402.757	81.0545	216.032	70.6002	71.8874	100.025	233.281	80.8376	- && - && -	1.52674	0.0105853	0.170577	up
Cg10492	940.162	990.355	885.519	242.749	382.441	640.324	938.679	421.838	- && - && -	1.15338	0.0106311	0.171166	up
Cg13208	817.429	563.655	1085.51	273.697	516.631	324.671	822.198	371.666	- && sp|Q03412|UNC7_CAEEL Innexin unc-7 OS=Caenorhabditis elegans OX=6239 GN=unc-7 PE=1 SV=1 && PF00876:Innexin	1.14544	0.0106859	0.17184	up
Cg10072	270.49	305.585	294.104	915.869	377.648	629.666	290.06	641.061	- && sp|Q9Y6C9|MTCH2_HUMAN Mitochondrial carrier homolog 2 OS=Homo sapiens OX=9606 GN=MTCH2 PE=1 SV=1 && PF00153:Mitochondrial carrier protein	-1.1439	0.0106912	0.17184	down
Cg20537	1352.45	832.905	684.459	236.946	475.415	535.38	956.605	415.914	- && - && PF11365:Protein SOGA	1.20111	0.0107034	0.171888	up
novel.6610	4.76635	17.7016	3.2084	0	0	0	8.55877	0	- && - && -	5.67633	0.0107065	1	up
Cg30527	183.504	254.343	273.784	32.8823	52.7174	157.416	237.21	81.0054	- && sp|Q70E73|RAPH1_HUMAN Ras-associated and pleckstrin homology domains-containing protein 1 OS=Homo sapiens OX=9606 GN=RAPH1 PE=1 SV=3 && PF00169:PH domain|PF00788:Ras association (RalGDS/AF-6) domain	1.54737	0.0107382	0.172025	up
Cg04937	1.19159	0	1.06947	4.83563	30.672	8.19877	0.753685	14.5688	- && - && PF03189:Otopetrin	-4.32316	0.0107422	0.172025	down
Cg07409	0	69.8745	7.48627	1.93425	1.917	1.63975	25.7869	1.83033	- && - && -	3.82338	0.0107479	0.172025	up
Cg25093	35.7476	93.1661	93.0437	36.7508	5.75099	12.2982	73.9858	18.2667	- && sp|P35778|VA3_SOLIN Venom allergen 3 OS=Solenopsis invicta OX=13686 PE=1 SV=2 && PF00188:Cysteine-rich secretory protein family	2.02254	0.0107545	0.172025	up
Cg13223	42.8971	10.2483	41.7092	0	2.8755	9.01865	31.6182	3.96472	- && sp|A6NMZ7|CO6A6_HUMAN Collagen alpha-6(VI) chain OS=Homo sapiens OX=9606 GN=COL6A6 PE=1 SV=2 && PF00092:von Willebrand factor type A domain|PF00431:CUB domain	2.97243	0.0107579	0.172025	up
Cg29654	71.4952	248.753	39.5703	14.5069	52.7174	26.2361	119.94	31.1535	- && sp|Q5ZJL4|CLP1_CHICK Polyribonucleotide 5'-hydroxyl-kinase Clp1 OS=Gallus gallus OX=9031 GN=CLP1 PE=2 SV=2 && PF16575:mRNA cleavage and polyadenylation factor CLP1 P-loop|PF16573:N-terminal beta-sandwich domain of polyadenylation factor|PF06807:Pre-mRNA cleavage complex II protein Clp1	1.94739	0.0107965	0.172495	up
Cg09557	14.299	26.0865	31.0146	41.5864	161.028	53.292	23.8	85.3021	- && - && -	-1.8377	0.0108222	0.172758	down
Cg12755	66.7289	54.0363	21.3893	137.332	201.285	81.1679	47.3849	139.928	- && - && PF15115:Domain of unknown function with conserved HDNR motif	-1.56252	0.010836	0.172832	down
Cg20381	38.1308	77.3278	28.8756	266.927	46.9664	168.075	48.1114	160.656	- && - && -	-1.73635	0.0108806	0.17299	down
Cg04402	169.205	114.594	158.281	39.6522	20.1285	88.5468	147.36	49.4425	- && sp|Q9H0J9|PAR12_HUMAN Protein mono-ADP-ribosyltransferase PARP12 OS=Homo sapiens OX=9606 GN=PARP12 PE=1 SV=1 && PF00644:Poly(ADP-ribose) polymerase catalytic domain	1.57106	0.0108867	0.17299	up
Cg03370	134.649	166.767	186.087	25.1453	95.8499	54.1119	162.501	58.369	- && sp|P54939|TLN1_CHICK Talin-1 OS=Gallus gallus OX=9031 GN=TLN1 PE=1 SV=2 && PF08913:Vinculin Binding Site	1.47765	0.0108905	0.17299	up
Cg20457	96.5186	84.7811	144.378	10.6384	49.8419	40.9939	108.559	33.8247	- && sp|Q6IR80|KICS2_XENLA KICSTOR subunit 2 OS=Xenopus laevis OX=8355 GN=kics2 PE=2 SV=1 && PF00209:Sodium:neurotransmitter symporter family	1.68053	0.0108972	0.17299	up
Cg30162	0	0	0	13.5398	0	20.4969	0	11.3456	- && sp|Q05546|TENR_RAT Tenascin-R OS=Rattus norvegicus OX=10116 GN=Tnr PE=1 SV=1 && PF00147:Fibrinogen beta and gamma chains, C-terminal globular domain	-5.86579	0.0108995	0.17299	down
Cg13341	104.86	149.997	137.961	175.05	337.392	409.939	130.939	307.46	- && - && PF03747:ADP-ribosylglycohydrolase	-1.23102	0.0109013	0.17299	down
Cg17195	233.551	148.134	45.9871	50.2906	32.589	54.1119	142.557	45.6638	- && sp|Q13823|NOG2_HUMAN Nucleolar GTP-binding protein 2 OS=Homo sapiens OX=9606 GN=GNL2 PE=1 SV=1 && PF08153:NGP1NT (NUC091) domain|PF01926:50S ribosome-binding GTPase	1.64073	0.0109287	0.173277	up
Cg19844	30.9813	131.364	63.0986	101.548	412.154	202.51	75.148	238.737	- && - && -	-1.66395	0.0109577	0.17359	down
Cg25002	21.4486	16.7699	108.016	0	7.66799	13.118	48.7449	6.92868	- && - && PF13637:Ankyrin repeats (many copies)|PF12796:Ankyrin repeats (3 copies)|PF18738:DZIP3/ hRUL138-like HEPN	2.80448	0.0109694	0.173628	up
Cg13889	322.92	324.218	337.952	617.994	907.698	504.225	328.363	676.639	- && sp|Q5DRA8|PCDGG_PANTR Protocadherin gamma-B4 OS=Pan troglodytes OX=9598 GN=PCDHGB4 PE=3 SV=1 && PF00028:Cadherin domain	-1.04289	0.0110047	0.17404	down
Cg09645	340.794	384.776	343.299	134.431	139.941	224.646	356.29	166.339	- && - && -	1.09802	0.0110399	0.174345	up
Cg29410	48.8551	32.6081	66.307	1.93425	0.958499	21.3168	49.2567	8.06985	- && sp|P35590|TIE1_HUMAN Tyrosine-protein kinase receptor Tie-1 OS=Homo sapiens OX=9606 GN=TIE1 PE=1 SV=1 && PF07714:Protein tyrosine and serine/threonine kinase	2.5917	0.0110444	0.174345	up
Cg16009	45.2803	33.5398	67.3764	135.398	116.937	120.522	48.7322	124.285	- && sp|A9UWF0|SURF1_MONBE SURF1-like protein OS=Monosiga brevicollis OX=81824 GN=18583 PE=3 SV=1 && PF02104:SURF1 family	-1.35225	0.011052	0.174345	down
Cg22344	1.19159	5.58996	14.9725	43.5207	48.8834	24.5963	7.25136	39.0001	- && - && PF05253:U11-48K-like CHHC zinc finger	-2.41989	0.0111348	0.175504	down
Cg05926	178.738	190.059	251.325	395.555	480.208	393.541	206.707	423.101	- && - && PF00100:Zona pellucida-like domain	-1.03323	0.0111917	0.176253	down
Cg04553	2.38317	0	3.2084	31.9152	17.253	9.01865	1.86386	19.3956	- && - && -	-3.40736	0.0112126	0.176433	down
novel.3353	2.38317	65.2162	4.27787	1.93425	1.917	2.45963	23.9591	2.10363	- && - && -	3.51191	0.011252	0.176904	up
Cg28400	282.406	520.798	393.564	56.0933	187.866	212.348	398.923	152.102	- && sp|Q9NR09|BIRC6_HUMAN Baculoviral IAP repeat-containing protein 6 OS=Homo sapiens OX=9606 GN=BIRC6 PE=1 SV=2 && PF00179:Ubiquitin-conjugating enzyme|PF12356:Baculoviral IAP repeat-containing protein 6	1.39063	0.0112624	0.17692	up
Cg28414	430.163	237.573	251.325	934.244	495.544	608.349	306.354	679.379	- && sp|Q0IUU4|CML2_ORYSJ Putative calmodulin-like protein 2 OS=Oryza sativa subsp. japonica OX=39947 GN=CML2 PE=3 SV=2 && PF13499:EF-hand domain pair	-1.14978	0.0113126	0.177559	down
Cg27998	4176.51	4826	2399.88	1658.62	1884.41	2052.15	3800.8	1865.06	- && sp|P47967|LEG5_RAT Galectin-5 OS=Rattus norvegicus OX=10116 GN=Lgals5 PE=1 SV=2 && PF00337:Galactoside-binding lectin	1.02707	0.0113357	0.177641	up
Cg03962	4431.51	1822.33	3493.95	1000.01	1963.01	1383.13	3249.26	1448.72	- && sp|P53567|CEBPG_HUMAN CCAAT/enhancer-binding protein gamma OS=Homo sapiens OX=9606 GN=CEBPG PE=1 SV=1 && PF07716:Basic region leucine zipper	1.16524	0.0113372	0.177641	up
novel.3338	76.2616	139.749	134.753	31.9152	38.3399	59.851	116.921	43.3687	- && - && -	1.42949	0.0113504	0.177641	up
Cg05543	41.7056	150.929	45.9871	86.0742	416.947	275.479	79.5406	259.5	- && - && -	-1.70274	0.0113558	0.177641	down
Cg24107	44.0887	6.52162	10.6947	135.398	29.7135	95.9256	20.435	87.0123	- && - && -	-2.10106	0.0113898	0.177884	down
novel.5155	215.677	127.637	238.491	543.525	340.267	396.821	193.935	426.871	- && - && -	-1.13915	0.0113994	0.177884	down
Cg29334	12667.8	8678.42	7576.11	3333.68	4419.64	6225.33	9640.76	4659.55	- && sp|P02637|SCP_MIZYE Sarcoplasmic calcium-binding protein OS=Mizuhopecten yessoensis OX=6573 PE=1 SV=1 && PF13499:EF-hand domain pair	1.04889	0.0113998	0.177884	up
novel.6791	0	0	0	35.7837	0	1.63975	0	12.4745	- && - && -	-5.9993	0.0114311	0.178093	down
Cg08143	47.6635	56.8313	2.13893	299.809	65.1779	109.864	35.5446	158.284	- && - && -	-2.15346	0.0114322	0.178093	down
Cg18098	32.1729	46.583	57.7512	170.214	74.7629	125.441	45.5024	123.473	- && - && -	-1.43847	0.0114467	0.178107	down
Cg17815	2373.64	2269.53	1259.83	303.678	1195.25	863.331	1967.67	787.419	- && sp|Q91YE8|SYNP2_MOUSE Synaptopodin-2 OS=Mus musculus OX=10090 GN=Synpo2 PE=1 SV=2 && PF00595:PDZ domain	1.32122	0.0114521	0.178107	up
Cg12575	15.4906	56.8313	16.042	90.9099	124.605	77.0685	29.4546	97.5277	- && sp|Q54KD0|Y7407_DICDI TPR repeat-containing protein DDB_G0287407 OS=Dictyostelium discoideum OX=44689 GN=DDB_G0287407 PE=4 SV=1 && PF13271:Domain of unknown function (DUF4062)|PF05729:NACHT domain|PF04300:F-box associated region|PF13424:Tetratricopeptide repeat	-1.71815	0.0114873	0.178507	down
Cg08997	40.514	53.1047	91.9742	231.143	160.069	103.305	61.8643	164.839	- && sp|Q95K40|CCD83_MACFA Coiled-coil domain-containing protein 83 OS=Macaca fascicularis OX=9541 GN=CCDC83 PE=2 SV=1 && -	-1.4124	0.0114985	0.178532	down
Cg17376	14.299	5.58996	38.5008	2.90138	1.917	1.63975	19.4633	2.15271	- && sp|P28827|PTPRM_HUMAN Receptor-type tyrosine-protein phosphatase mu OS=Homo sapiens OX=9606 GN=PTPRM PE=1 SV=2 && PF00102:Protein-tyrosine phosphatase|PF00084:Sushi repeat (SCR repeat)	3.18098	0.01152	0.178578	up
Cg04849	70.3037	83.8495	65.2375	262.091	177.322	106.584	73.1302	181.999	- && sp|Q6GLK6|ACSF3_XENLA Malonate--CoA ligase ACSF3, mitochondrial OS=Xenopus laevis OX=8355 GN=acsf3 PE=2 SV=1 && PF00501:AMP-binding enzyme	-1.31372	0.0115241	0.178578	down
Cg15046	15.4906	29.8131	18.1809	95.7455	58.4684	50.0125	21.1616	68.0755	- && sp|Q7T070|RHBG_DANRE Ammonium transporter Rh type B OS=Danio rerio OX=7955 GN=rhbg PE=2 SV=1 && PF00909:Ammonium Transporter Family	-1.67874	0.0115491	0.178625	down
Cg28281	21.4486	5.58996	19.2504	59.9618	47.9249	60.6709	15.4296	56.1859	- && sp|P27163|CALM2_PETHY Calmodulin-2 OS=Petunia hybrida OX=4102 GN=CAM72 PE=2 SV=2 && PF13499:EF-hand domain pair	-1.87487	0.0115649	0.178625	down
novel.5229	4.76635	8.38495	3.2084	18.3754	33.5475	35.2547	5.45323	29.0592	- && - && -	-2.40392	0.0115681	0.178625	down
Cg27068	3.57476	3.72664	1.06947	1.93425	56.5514	20.4969	2.79029	26.3275	- && sp|O60041|CALM_KLULA Calmodulin OS=Kluyveromyces lactis (strain ATCC 8585 / CBS 2359 / DSM 70799 / NBRC 1267 / NRRL Y-1140 / WM37) OX=284590 GN=CMD1 PE=1 SV=1 && PF13499:EF-hand domain pair|PF13833:EF-hand domain pair	-3.23581	0.0115771	0.178625	down
Cg09172	65.5373	101.551	275.923	58.9947	25.8795	55.7517	147.67	46.8753	- && sp|P80424|LDTI_HIRME Leech-derived tryptase inhibitor C OS=Hirudo medicinalis OX=6421 PE=1 SV=1 && PF00050:Kazal-type serine protease inhibitor domain	1.65496	0.0115808	0.178625	up
Cg09804	90.5606	101.551	208.546	45.4549	16.2945	67.2299	133.553	42.9931	- && sp|O88488|PTPRQ_RAT Phosphatidylinositol phosphatase PTPRQ OS=Rattus norvegicus OX=10116 GN=Ptprq PE=1 SV=1 && PF00041:Fibronectin type III domain|PF00102:Protein-tyrosine phosphatase|PF18861:Transmembrane domain of protein tyrosine phosphatase, receptor type J	1.63248	0.0115973	0.178733	up
Cg25750	1.19159	0	0	5.80276	20.1285	7.3789	0.397196	11.1034	- && sp|Q9Y289|SC5A6_HUMAN Sodium-dependent multivitamin transporter OS=Homo sapiens OX=9606 GN=SLC5A6 PE=1 SV=2 && PF00474:Sodium:solute symporter family	-4.87018	0.0116076	0.178744	down
novel.1194	0	0	0	9.67126	6.70949	9.01865	0	8.46647	- && - && -	-5.44206	0.0116295	1	down
Cg17494	28.5981	2.79498	25.6672	321.086	31.6305	7.3789	19.0201	120.032	- && sp|P91924|ARF_DUGJA ADP-ribosylation factor OS=Dugesia japonica OX=6161 PE=2 SV=3 && PF00025:ADP-ribosylation factor family	-2.66259	0.0116323	0.178977	down
Cg02456	123.925	52.173	147.586	28.0467	23.9625	54.1119	107.895	35.3737	- && sp|Q04786|HEX_VIBVL Beta-hexosaminidase OS=Vibrio vulnificus OX=672 GN=hex PE=3 SV=1 && PF00728:Glycosyl hydrolase family 20, catalytic domain|PF02838:Glycosyl hydrolase family 20, domain 2|PF03173:Putative carbohydrate binding domain|PF03174:Chitobiase/beta-hexosaminidase C-terminal domain	1.60405	0.0116985	0.179699	up
Cg03149	0	0	3.2084	20.3097	30.672	3.27951	1.06947	18.087	- && - && PF13843:Transposase IS4	-4.08338	0.0117062	0.179699	down
novel.5094	0	0	0	19.3425	6.70949	1.63975	0	9.23059	- && - && -	-5.56401	0.0117085	1	down
Cg11966	1400.12	577.63	555.054	89.9427	439.951	364.026	844.266	297.973	- && sp|D3YXG0|HMCN1_MOUSE Hemicentin-1 OS=Mus musculus OX=10090 GN=Hmcn1 PE=1 SV=1 && PF00090:Thrombospondin type 1 domain	1.50201	0.0117154	0.179699	up
Cg07012	0	0	8.55574	35.7837	25.8795	22.1367	2.85191	27.9333	- && - && -	-3.29438	0.0117176	0.179699	down
Cg20268	214.486	280.43	211.755	80.2715	75.7214	147.578	235.557	101.19	- && sp|Q5TF39|MFS4B_HUMAN Sodium-dependent glucose transporter 1 OS=Homo sapiens OX=9606 GN=MFSD4B PE=1 SV=1 && PF07690:Major Facilitator Superfamily	1.21764	0.0117666	0.180176	up
novel.281	13.1075	62.4213	182.879	763.063	26.838	447.653	86.1359	412.518	- && - && -	-2.25916	0.0117751	0.180176	down
Cg19268	60.771	79.1911	124.058	24.1782	29.7135	38.5342	88.0068	30.8086	- && sp|B2IZD3|BDLP_NOSP7 Bacterial dynamin-like protein OS=Nostoc punctiforme (strain ATCC 29133 / PCC 73102) OX=63737 GN=Npun_R6513 PE=1 SV=1 && PF00350:Dynamin family|PF07714:Protein tyrosine and serine/threonine kinase	1.51266	0.0117776	0.180176	up
Cg07037	52.4298	49.378	45.9871	14.5069	19.17	4.09939	49.265	12.5921	- && - && -	1.97571	0.0118121	0.18041	up
Cg12974	0	121.116	96.2521	0	1.917	2.45963	72.456	1.45888	- && sp|Q8BV66|IFI44_MOUSE Interferon-induced protein 44 OS=Mus musculus OX=10090 GN=Ifi44 PE=2 SV=1 && PF07534:TLD|PF00735:Septin	5.62582	0.0118121	0.18041	up
Cg29516	8.34111	27.0182	26.7367	0	4.79249	1.63975	20.6987	2.14408	- && - && -	3.27763	0.0118386	0.180666	up
Cg00170	8.34111	13.9749	10.6947	16.4411	75.7214	49.1926	11.0036	47.1184	- && - && -	-2.09317	0.0118532	0.180743	down
Cg20782	153.715	102.483	126.197	353.968	261.67	221.367	127.465	279.002	- && sp|Q01459|DIAC_HUMAN Di-N-acetylchitobiase OS=Homo sapiens OX=9606 GN=CTBS PE=1 SV=1 && PF00704:Glycosyl hydrolases family 18	-1.13113	0.0118658	0.180787	down
Cg15644	48.8551	64.2846	31.0146	1.93425	11.502	18.0373	48.0514	10.4912	- && sp|A2AX52|CO6A4_MOUSE Collagen alpha-4(VI) chain OS=Mus musculus OX=10090 GN=Col6a4 PE=1 SV=2 && PF00092:von Willebrand factor type A domain	2.18781	0.0118861	0.180945	up
Cg21366	7.14952	26.0865	14.9725	53.1919	69.0119	50.8324	16.0695	57.6787	- && - && PF12736:Cell-cycle sustaining, positive selection,	-1.83217	0.0119125	0.181055	down
Cg19196	583.878	1855.87	3387	620.895	273.172	1075.68	1942.25	656.582	- && sp|Q5G270|NETR_GORGO Neurotrypsin OS=Gorilla gorilla gorilla OX=9595 GN=PRSS12 PE=3 SV=1 && PF00051:Kringle domain|PF00089:Trypsin|PF00024:PAN domain|PF00059:Lectin C-type domain|PF00530:Scavenger receptor cysteine-rich domain|PF00057:Low-density lipoprotein receptor domain class A	1.56452	0.0119369	0.181055	up
Cg21846	84.6027	140.681	297.312	19.3425	69.0119	77.0685	174.198	55.141	- && - && PF00001:7 transmembrane receptor (rhodopsin family)	1.65819	0.0119615	0.181055	up
Cg09585	41.7056	27.9498	29.9451	65.7646	136.107	78.7082	33.2002	93.5265	- && - && -	-1.49666	0.0119616	0.181055	down
Cg24972	941.354	267.387	376.453	179.885	269.338	176.274	528.398	208.499	- && - && PF06021:Aralkyl acyl-CoA:amino acid N-acyltransferase|PF08445:FR47-like protein	1.34108	0.0119619	0.181055	up
Cg18112	17.8738	53.1047	51.3344	231.143	57.5099	108.224	40.771	132.292	- && - && -	-1.69392	0.0119685	0.181055	down
Cg26667	132.266	92.2344	51.3344	277.565	325.89	123.801	91.945	242.419	- && sp|Q66J54|S226A_XENLA Solute carrier family 22 member 6-A OS=Xenopus laevis OX=8355 GN=slc22a6-a PE=2 SV=1 && PF00083:Sugar (and other) transporter	-1.39925	0.0119704	0.181055	down
Cg21101	7.14952	66.1479	1.06947	0	0	4.09939	24.789	1.36646	- && sp|Q9UGM3|DMBT1_HUMAN Deleted in malignant brain tumors 1 protein OS=Homo sapiens OX=9606 GN=DMBT1 PE=1 SV=2 && PF00002:7 transmembrane receptor (Secretin family)|PF00530:Scavenger receptor cysteine-rich domain	4.14171	0.0119894	0.181195	up
Cg26718	100.093	27.0182	105.877	30.948	21.087	14.7578	77.6629	22.2643	- && - && -	1.80315	0.0120069	0.181314	up
Cg25124	4.76635	11.1799	8.55574	104.45	6.70949	29.5156	8.16734	46.8916	- && sp|A7T1N0|TMP2L_NEMVE Transient receptor potential cation channel subfamily M member-like 2 OS=Nematostella vectensis OX=45351 GN=TRPM2 PE=1 SV=1 && PF18139:SLOG in TRPM|PF00520:Ion transport protein	-2.51279	0.0120568	0.181921	down
Cg14035	9.5327	23.2915	51.3344	1.93425	8.62649	0.819877	28.0529	3.79354	- && sp|P20735|GGT1_PIG Glutathione hydrolase 1 proenzyme OS=Sus scrofa OX=9823 GN=GGT1 PE=2 SV=1 && PF01019:Gamma-glutamyltranspeptidase	2.90043	0.0120883	0.182007	up
Cg29452	1.19159	37.2664	9.62521	23.211	254.961	22.9566	16.0277	100.376	- && - && -	-2.63547	0.0121019	0.182007	down
Cg28894	82.2195	97.8244	101.599	108.318	498.419	181.193	93.8811	262.643	- && - && -	-1.4835	0.0121179	0.182007	down
Cg22974	380.116	327.945	425.648	84.14	113.103	264.001	377.903	153.748	- && - && PF00001:7 transmembrane receptor (rhodopsin family)	1.29566	0.0121211	0.182007	up
Cg24204	11.9159	0	3.2084	51.2577	43.1324	13.118	5.04143	35.8361	- && - && -	-2.85699	0.0121487	0.182007	down
Cg15857	1180.86	334.466	1411.7	285.302	538.676	305.814	975.675	376.598	- && - && PF00531:Death domain	1.37325	0.012149	0.182007	up
Cg29823	52.4298	118.321	45.9871	101.548	415.03	144.298	72.2459	220.292	- && sp|P31597|EAA3_RABIT Excitatory amino acid transporter 3 OS=Oryctolagus cuniculus OX=9986 GN=SLC1A1 PE=1 SV=1 && PF00375:Sodium:dicarboxylate symporter family	-1.60542	0.0121516	0.182007	down
Cg07898	2578.59	1353.7	1882.26	1338.5	685.327	557.517	1938.19	860.449	- && sp|O62640|PIAP_PIG Putative inhibitor of apoptosis OS=Sus scrofa OX=9823 GN=PIAP PE=2 SV=1 && PF13920:Zinc finger, C3HC4 type (RING finger)|PF00653:Inhibitor of Apoptosis domain	1.17161	0.0121574	0.182007	up
Cg14441	11.9159	0	2.13893	30.948	455.287	4.91926	4.68494	163.718	- && sp|Q2WGJ6|KLH38_HUMAN Kelch-like protein 38 OS=Homo sapiens OX=9606 GN=KLHL38 PE=1 SV=3 && PF01344:Kelch motif	-5.13767	0.0121644	0.182007	down
Cg12302	1171.33	3764.84	1780.66	616.059	438.992	1474.14	2238.94	843.064	- && sp|Q95078|CP18A_DROME Cytochrome P450 18a1 OS=Drosophila melanogaster OX=7227 GN=Cyp18a1 PE=2 SV=2 && PF00067:Cytochrome P450	1.40898	0.0121694	0.182007	up
Cg13972	27.4065	67.0796	6.4168	192.458	63.2609	125.441	33.6343	127.053	- && sp|Q6X0I2|VGR_SOLIN Vitellogenin receptor OS=Solenopsis invicta OX=13686 GN=VgR PE=2 SV=1 && PF14670:Coagulation Factor Xa inhibitory site|PF00057:Low-density lipoprotein receptor domain class A	-1.91208	0.0121833	0.182068	down
Cg27399	511.191	342.851	315.493	913.934	1344.77	455.032	389.845	904.58	- && - && -	-1.21453	0.012216	0.182315	down
Cg21403	175.163	247.822	143.309	409.094	359.437	417.318	188.765	395.283	- && sp|Q99L13|3HIDH_MOUSE 3-hydroxyisobutyrate dehydrogenase, mitochondrial OS=Mus musculus OX=10090 GN=Hibadh PE=1 SV=1 && PF14833:NAD-binding of NADP-dependent 3-hydroxyisobutyrate dehydrogenase|PF03446:NAD binding domain of 6-phosphogluconate dehydrogenase	-1.06536	0.0122192	0.182315	down
Cg21035	25.0233	54.968	25.6672	145.069	90.0989	72.9691	35.2195	102.712	- && - && -	-1.53794	0.0122586	0.18268	down
novel.4710	13.1075	29.8131	13.9031	100.581	50.8004	45.0933	18.9412	65.4916	- && - && -	-1.78108	0.0122671	0.18268	down
Cg09975	0	0	1.06947	24.1782	0	18.0373	0.356489	14.0718	- && - && PF05050:Methyltransferase FkbM domain	-5.21358	0.012273	0.18268	down
novel.3647	0	0	0	16.4411	0	16.3975	0	10.9462	- && - && -	-5.81344	0.0123026	0.18286	down
Cg28858	32.1729	24.2232	25.6672	0	0	8.19877	27.3544	2.73292	- && sp|Q8BQZ4|RLGPB_MOUSE Ral GTPase-activating protein subunit beta OS=Mus musculus OX=10090 GN=Ralgapb PE=1 SV=2 && -	3.28726	0.0123091	0.18286	up
Cg23019	610.093	635.393	931.506	255.321	461.038	319.752	725.664	345.37	- && - && -	1.07125	0.0123144	0.18286	up
Cg11173	39.3224	13.0432	59.8902	0	9.58499	7.3789	37.4186	5.65463	- && sp|Q921A2|MYCT_RAT Proton myo-inositol cotransporter OS=Rattus norvegicus OX=10116 GN=Slc2a13 PE=1 SV=2 && PF00083:Sugar (and other) transporter	2.71995	0.0123453	0.183102	up
Cg10651	668.48	630.734	1042.73	455.516	317.263	369.765	780.648	380.848	- && sp|Q6P799|SYSC_RAT Serine--tRNA ligase, cytoplasmic OS=Rattus norvegicus OX=10116 GN=Sars1 PE=1 SV=3 && PF02403:Seryl-tRNA synthetase N-terminal domain|PF00587:tRNA synthetase class II core domain (G, H, P, S and T)	1.03547	0.0123502	0.183102	up
Cg04410	56.0046	128.569	181.809	29.9809	48.8834	49.1926	122.128	42.6857	- && sp|Q54YM7|TM2D2_DICDI TM2 domain-containing protein DDB_G0278163 OS=Dictyostelium discoideum OX=44689 GN=DDB_G0278163 PE=3 SV=1 && PF05154:TM2 domain	1.51669	0.0123647	0.183172	up
novel.3497	0	1.86332	2.13893	56.0933	0	13.9379	1.33409	23.3437	- && - && -	-4.10183	0.0123974	0.183511	down
Cg27330	9.5327	0.931661	102.669	0.967126	4.79249	5.73914	37.7111	3.83292	- && sp|Q8CFG8|CS1B_MOUSE Complement C1s-B subcomponent OS=Mus musculus OX=10090 GN=C1sb PE=2 SV=1 && PF00084:Sushi repeat (SCR repeat)|PF16977:C-terminal domain of apextrin|PF00431:CUB domain|PF01400:Astacin (Peptidase family M12A)|PF00051:Kringle domain	3.29099	0.0124347	0.183777	up
Cg23508	29.7897	15.8382	36.3619	0	3.83399	7.3789	27.3299	3.73763	- && sp|P29066|ARRB1_RAT Beta-arrestin-1 OS=Rattus norvegicus OX=10116 GN=Arrb1 PE=1 SV=1 && PF00339:Arrestin (or S-antigen), N-terminal domain	2.85117	0.0124439	0.183777	up
Cg04222	683.971	381.049	486.608	282.401	264.546	183.653	517.209	243.533	- && - && -	1.08662	0.0124497	0.183777	up
novel.6866	1738.53	495.643	871.616	3427.5	2771.02	1479.06	1035.26	2559.19	- && - && -	-1.306	0.0124591	0.183777	down
novel.5866	0	0	0	25.1453	0	8.19877	0	11.1147	- && - && -	-5.83381	0.0124715	0.183777	down
novel.2775	0	0.931661	0	28.0467	0.958499	8.19877	0.310554	12.4013	- && - && -	-5.0296	0.0125003	0.183777	down
novel.1831	26.2149	12.1116	19.2504	112.187	33.5475	55.7517	19.1923	67.1619	- && - && -	-1.81255	0.0125041	0.183777	down
Cg27627	126.308	167.699	103.738	261.124	453.37	208.249	132.582	307.581	- && sp|Q7L0Q8|RHOU_HUMAN Rho-related GTP-binding protein RhoU OS=Homo sapiens OX=9606 GN=RHOU PE=1 SV=1 && PF00071:Ras family	-1.21279	0.0125097	0.183777	down
Cg10241	407.523	291.61	440.621	863.644	834.852	596.051	379.918	764.849	- && sp|A7SMR0|MEIG1_NEMVE Meiosis expressed gene 1 protein homolog OS=Nematostella vectensis OX=45351 GN=v1g237368 PE=3 SV=1 && -	-1.00976	0.0125101	0.183777	down
Cg07766	4921.26	7088.07	1880.12	1894.6	935.495	2618.69	4629.82	1816.26	- && sp|Q99946|PRRT1_HUMAN Proline-rich transmembrane protein 1 OS=Homo sapiens OX=9606 GN=PRRT1 PE=1 SV=2 && PF04505:Interferon-induced transmembrane protein	1.34994	0.0125135	0.183777	up
Cg22478	142.99	116.458	99.4605	357.837	192.658	250.063	119.636	266.853	- && sp|A0A0G2K047|ACSS3_RAT Acyl-CoA synthetase short-chain family member 3, mitochondrial OS=Rattus norvegicus OX=10116 GN=Acss3 PE=1 SV=1 && PF00501:AMP-binding enzyme|PF16177:Acetyl-coenzyme A synthetase N-terminus|PF13193:AMP-binding enzyme C-terminal domain	-1.15795	0.0125406	0.18403	down
Cg08308	14.299	43.788	31.0146	1.93425	4.79249	9.01865	29.7005	5.24847	- && sp|A2BE28|LAS1L_MOUSE Ribosomal biogenesis protein LAS1L OS=Mus musculus OX=10090 GN=Las1l PE=1 SV=1 && PF04031:Las1-like	2.49151	0.0125524	0.184059	up
Cg09925	249.042	449.992	496.233	753.391	1266.18	633.765	398.422	884.444	- && sp|Q9DAK2|PACRG_MOUSE Parkin coregulated gene protein homolog OS=Mus musculus OX=10090 GN=Pacrg PE=1 SV=1 && PF10274:Parkin co-regulated protein	-1.14984	0.0126102	0.184763	down
novel.620	126.308	107.141	133.683	58.9947	56.5514	26.2361	122.378	47.2607	- && - && -	1.37515	0.0126328	0.184948	up
novel.605	96.5186	89.4394	47.0566	182.787	162.945	204.149	77.6715	183.294	- && - && -	-1.23922	0.0126478	0.185024	down
Cg15596	85.7943	31.6765	33.1535	188.59	106.393	123.801	50.2081	139.595	- && - && -	-1.48004	0.0126638	0.185113	down
Cg09345	171.589	154.656	191.435	58.9947	65.1779	100.025	172.56	74.7326	- && sp|O94822|LTN1_HUMAN E3 ubiquitin-protein ligase listerin OS=Homo sapiens OX=9606 GN=LTN1 PE=1 SV=6 && -	1.20522	0.0126956	0.185434	up
Cg22758	201.378	175.152	347.577	98.6469	128.439	86.0871	241.369	104.391	- && sp|Q7Z7G8|VP13B_HUMAN Vacuolar protein sorting-associated protein 13B OS=Homo sapiens OX=9606 GN=VPS13B PE=1 SV=2 && PF16909:Vacuolar-sorting-associated 13 protein C-terminal|PF16908:Vacuolar sorting-associated protein 13, N-terminal|PF06650:SHR-binding domain of vacuolar-sorting associated protein 13|PF12624:N-terminal region of Chorein or VPS13	1.20967	0.0127427	0.185976	up
novel.2430	402.757	142.544	560.401	137.332	35.4645	188.572	368.567	120.456	- && Q7M438.3 RecName: Full=Ribonuclease DdI; Short=RNase DdI; Flags: Precursor && PF00445:Ribonuclease T2 family	1.61199	0.0127886	0.1865	up
Cg03478	0	3.72664	27.8062	0	0	0	10.5109	0	- && - && PF14291:Domain of unknown function (DUF4371)	5.9689	0.0127918	1	up
Cg15781	153.715	140.681	166.837	515.478	232.915	285.317	153.744	344.57	- && - && PF07883:Cupin domain	-1.16424	0.0128528	0.187291	down
Cg10218	326.495	272.977	304.798	92.8441	162.945	163.156	301.423	139.648	- && sp|Q9BTV4|TMM43_HUMAN Transmembrane protein 43 OS=Homo sapiens OX=9606 GN=TMEM43 PE=1 SV=1 && PF07787:Transmembrane protein 43	1.10911	0.012876	0.187483	up
Cg30230	0	5.58996	0	28.0467	9.58499	28.6957	1.86332	22.1091	- && - && PF05050:Methyltransferase FkbM domain	-3.5114	0.0128899	0.18754	down
novel.6775	0	0	0	1.93425	9.58499	14.7578	0	8.75901	- && - && -	-5.49305	0.0129076	1	down
Cg16983	0	0	0	14.5069	1.917	9.83853	0	8.75414	- && - && PF00059:Lectin C-type domain	-5.49032	0.0129486	1	down
Cg22612	5.95794	0	0	25.1453	14.3775	25.4162	1.98598	21.6463	- && sp|G5EBQ8|CHS2_CAEEL Chitin synthase chs-2 OS=Caenorhabditis elegans OX=6239 GN=chs-2 PE=1 SV=1 && PF00063:Myosin head (motor domain)|PF03142:Chitin synthase	-3.50398	0.0129722	0.188317	down
Cg10553	9.5327	33.5398	1.06947	0	0	1.63975	14.714	0.546585	- && - && -	4.68253	0.0129758	0.188317	up
Cg26382	19.0654	18.6332	3.2084	40.6193	45.0494	79.5281	13.6357	55.0656	- && sp|O09174|AMACR_MOUSE Alpha-methylacyl-CoA racemase OS=Mus musculus OX=10090 GN=Amacr PE=1 SV=4 && PF02515:CoA-transferase family III	-2.01476	0.0129885	0.188317	down
novel.1742	3.57476	59.6263	3.2084	3.86851	0	0.819877	22.1365	1.56279	- && Q17QD6.1 RecName: Full=Tomoregulin-2; Short=TR-2; AltName: Full=Transmembrane protein with EGF-like and two follistatin-like domains; Flags: Precursor && PF07648:Kazal-type serine protease inhibitor domain	3.84161	0.01299	0.188317	up
Cg23546	154.906	68.0112	134.753	249.519	394.901	209.069	119.223	284.496	- && sp|Q49B93|SC5AC_MOUSE Sodium-coupled monocarboxylate transporter 2 OS=Mus musculus OX=10090 GN=Slc5a12 PE=1 SV=1 && PF00474:Sodium:solute symporter family|PF09815:XK-related protein	-1.25648	0.0129936	0.188317	down
Cg21265	193.037	108.073	213.893	46.4221	95.8499	63.1306	171.668	68.4675	- && sp|Q4V7E1|ELF3_RAT ETS-related transcription factor Elf-3 OS=Rattus norvegicus OX=10116 GN=Elf3 PE=2 SV=1 && PF00178:Ets-domain|PF02198:Sterile alpha motif (SAM)/Pointed domain	1.32548	0.0130118	0.18833	up
Cg23360	181.121	173.289	232.074	600.585	270.297	416.498	195.495	429.127	- && - && -	-1.13433	0.0130147	0.18833	down
Cg06132	47.6635	96.8927	85.5574	256.288	138.982	168.075	76.7045	187.782	- && sp|Q9NUD7|CT096_HUMAN Uncharacterized protein C20orf96 OS=Homo sapiens OX=9606 GN=C20orf96 PE=2 SV=2 && PF15397:Domain of unknown function (DUF4618)	-1.28884	0.013052	0.188462	down
Cg21448	1331	1493.45	344.368	439.075	515.672	96.7455	1056.27	350.498	- && sp|P42674|BP10_PARLI Blastula protease 10 OS=Paracentrotus lividus OX=7656 GN=BP10 PE=2 SV=1 && PF00629:MAM domain, meprin/A5/mu|PF00431:CUB domain|PF01400:Astacin (Peptidase family M12A)	1.59202	0.0130574	0.188462	up
novel.6059	550.513	260.865	368.966	128.628	243.459	141.019	393.448	171.035	- && - && -	1.20155	0.0130576	0.188462	up
Cg24016	374.158	428.564	439.551	112.187	162.945	279.578	414.091	184.903	- && sp|Q6NZC7|S23IP_MOUSE SEC23-interacting protein OS=Mus musculus OX=10090 GN=Sec23ip PE=1 SV=2 && PF00536:SAM domain (Sterile alpha motif)|PF02862:DDHD domain	1.16208	0.0130715	0.188462	up
novel.1830	22.6402	0.931661	7.48627	71.5673	40.2569	41.8137	10.3527	51.2127	- && - && -	-2.32496	0.0130741	0.188462	down
Cg14823	3040.93	5376.61	4326	706.002	748.587	3246.71	4247.85	1567.1	- && - && PF00335:Tetraspanin family	1.43847	0.0130999	0.188689	up
Cg19005	238.317	175.152	155.073	64.7975	78.5969	104.944	189.514	82.7796	- && sp|P41233|ABCA1_MOUSE Phospholipid-transporting ATPase ABCA1 OS=Mus musculus OX=10090 GN=Abca1 PE=1 SV=4 && PF00386:C1q domain|PF04117:Mpv17 / PMP22 family|PF12698:ABC-2 family transporter protein|PF00005:ABC transporter	1.19297	0.0131178	0.18878	up
Cg18640	157.29	218.94	231.005	33.8494	107.352	95.1058	202.412	78.769	- && sp|Q8IWF2|FXRD2_HUMAN FAD-dependent oxidoreductase domain-containing protein 2 OS=Homo sapiens OX=9606 GN=FOXRED2 PE=1 SV=1 && PF13738:Pyridine nucleotide-disulphide oxidoreductase	1.36108	0.0131363	0.18878	up
Cg04922	240.701	468.625	316.562	82.2057	171.571	182.833	341.963	145.537	- && sp|P53565|CUX1_RAT Homeobox protein cut-like 1 OS=Rattus norvegicus OX=10116 GN=Cux1 PE=1 SV=2 && PF02376:CUT domain	1.23243	0.0131365	0.18878	up
Cg28342	50.0467	60.5579	81.2795	47.3892	387.233	177.094	63.9614	203.905	- && sp|P58195|PLS1_RAT Phospholipid scramblase 1 OS=Rattus norvegicus OX=10116 GN=Plscr1 PE=1 SV=1 && PF03803:Scramblase	-1.67211	0.0131972	0.18948	down
Cg14613	0	0.931661	2.13893	32.8823	2.8755	12.2982	1.02353	16.0187	- && sp|Q9H1Q7|PED1A_HUMAN PC-esterase domain-containing protein 1A OS=Homo sapiens OX=9606 GN=PCED1A PE=1 SV=1 && -	-3.94683	0.0132154	0.18948	down
Cg12268	83.4111	13.0432	69.5154	10.6384	2.8755	20.4969	55.3232	11.3369	- && - && PF01607:Chitin binding Peritrophin-A domain	2.27686	0.0132155	0.18948	up
Cg19161	268.107	294.405	233.144	1078.35	239.625	673.119	265.219	663.697	- && - && -	-1.32321	0.013252	0.189858	down
Cg14799	14.299	107.141	1.06947	0	0	9.01865	40.8365	3.00622	- && sp|Q8K0U4|HS12A_MOUSE Heat shock 70 kDa protein 12A OS=Mus musculus OX=10090 GN=Hspa12a PE=1 SV=1 && -	3.74097	0.0132899	0.190166	up
Cg24599	338.411	227.325	243.839	88.9756	133.231	147.578	269.858	123.262	- && sp|P97564|GPAT1_RAT Glycerol-3-phosphate acyltransferase 1, mitochondrial OS=Rattus norvegicus OX=10116 GN=Gpam PE=1 SV=3 && PF01553:Acyltransferase	1.12908	0.0132939	0.190166	up
Cg11198	191.846	218.009	202.129	59.9618	91.0574	118.882	203.994	89.9671	- && sp|Q3SY69|AL1L2_HUMAN Mitochondrial 10-formyltetrahydrofolate dehydrogenase OS=Homo sapiens OX=9606 GN=ALDH1L2 PE=1 SV=2 && PF00551:Formyl transferase|PF00171:Aldehyde dehydrogenase family|PF02911:Formyl transferase, C-terminal domain	1.17978	0.0133175	0.190214	up
Cg04077	30.9813	48.4463	179.671	2.90138	35.4645	18.0373	86.366	18.801	- && - && -	2.19975	0.0133175	0.190214	up
Cg05219	14.299	13.0432	19.2504	80.2715	39.2984	40.174	15.5309	53.248	- && - && PF07525:SOCS box	-1.7776	0.0133544	0.190452	down
novel.2553	81.0279	63.3529	274.853	48.3563	40.2569	49.1926	139.745	45.9353	- && - && PF00643:B-box zinc finger	1.60451	0.0133545	0.190452	up
Cg28388	51.2383	151.861	83.4185	227.275	391.067	145.938	95.5058	254.76	- && - && PF14983:Domain of unknown function (DUF4513)	-1.4121	0.0133674	0.19049	down
Cg06780	507.616	245.027	368.966	235.012	118.854	132	373.87	161.955	- && sp|O95395|GCNT3_HUMAN Beta-1,3-galactosyl-O-glycosyl-glycoprotein beta-1,6-N-acetylglucosaminyltransferase 3 OS=Homo sapiens OX=9606 GN=GCNT3 PE=2 SV=1 && PF02485:Core-2/I-Branching enzyme	1.20676	0.0134225	0.191094	up
Cg09035	51.2383	169.562	125.128	147.97	613.439	241.864	115.309	334.424	- && sp|Q8TE73|DYH5_HUMAN Dynein axonemal heavy chain 5 OS=Homo sapiens OX=9606 GN=DNAH5 PE=1 SV=3 && PF17852:Dynein heavy chain AAA lid domain|PF18199:Dynein heavy chain C-terminal domain|PF08385:Dynein heavy chain, N-terminal region 1|PF17857:AAA+ lid domain|PF12775:P-loop containing dynein motor region|PF03028:Dynein heavy chain region D6 P-loop domain|PF12777:Microtubule-binding stalk of dyne…	-1.53403	0.0134302	0.191094	down
Cg29510	19.0654	3.72664	7.48627	0	0.958499	0	10.0928	0.3195	- && - && -	4.94326	0.013433	1	up
Cg16873	924.672	1043.46	1397.79	306.579	586.601	686.237	1121.98	526.473	- && sp|P09324|YES_CHICK Tyrosine-protein kinase Yes OS=Gallus gallus OX=9031 GN=YES1 PE=1 SV=3 && PF00018:SH3 domain|PF00017:SH2 domain|PF07714:Protein tyrosine and serine/threonine kinase	1.09135	0.01346	0.191227	up
Cg12621	0	0	0	16.4411	0	15.5777	0	10.6729	- && - && -	-5.77688	0.0134708	0.191227	down
Cg21139	277.64	54.0363	109.086	497.103	668.074	167.255	146.921	444.144	- && sp|Q96BD0|SO4A1_HUMAN Solute carrier organic anion transporter family member 4A1 OS=Homo sapiens OX=9606 GN=SLCO4A1 PE=1 SV=2 && PF03137:Organic Anion Transporter Polypeptide (OATP) family|PF07648:Kazal-type serine protease inhibitor domain	-1.59779	0.0134793	0.191227	down
Cg21133	59.5794	56.8313	79.1406	108.318	245.376	132.82	65.1837	162.171	- && - && -	-1.31486	0.0134804	0.191227	down
Cg16011	0	0	3.2084	7.73701	31.6305	10.6584	1.06947	16.6753	- && - && PF13445:RING-type zinc-finger	-3.96747	0.0135126	0.191455	down
Cg20184	413.481	410.862	350.785	130.562	212.787	222.187	391.709	188.512	- && sp|Q9NGC3|CEG1A_DROME Centaurin-gamma-1A OS=Drosophila melanogaster OX=7227 GN=CenG1A PE=2 SV=2 && PF00071:Ras family|PF01412:Putative GTPase activating protein for Arf|PF12796:Ankyrin repeats (3 copies)	1.0546	0.0135237	0.191455	up
Cg18507	120.35	280.43	298.381	39.6522	58.4684	148.398	233.054	82.1728	- && sp|Q5SSM3|RHG44_MOUSE Rho GTPase-activating protein 44 OS=Mus musculus OX=10090 GN=Arhgap44 PE=1 SV=1 && PF03114:BAR domain|PF00620:RhoGAP domain	1.50209	0.0135346	0.191455	up
Cg17655	7.14952	14.9066	20.3199	12.5726	140.899	42.6336	14.1253	65.3685	- && sp|Q02962|PAX2_HUMAN Paired box protein Pax-2 OS=Homo sapiens OX=9606 GN=PAX2 PE=1 SV=4 && PF00292:'Paired box' domain	-2.206	0.0135373	0.191455	down
Cg11251	100.093	79.1911	88.7658	197.294	392.984	105.764	89.3501	232.014	- && - && -	-1.37669	0.0135527	0.191528	down
novel.6604	40.514	0	0	0	0	0	13.5047	0	- && - && -	6.32638	0.0135871	0.191869	up
Cg16380	23.8317	2.79498	23.5283	4.83563	69.9704	209.889	16.7183	94.8982	- && - && PF01145:SPFH domain / Band 7 family	-2.51244	0.0136119	0.191996	down
Cg16432	14.299	13.9749	27.8062	72.5345	59.4269	47.5529	18.6934	59.8381	- && - && -	-1.67829	0.0136166	0.191996	down
novel.6662	59.5794	1.86332	36.3619	5.80276	0.958499	5.73914	32.6015	4.1668	- && - && -	2.95926	0.0136361	0.192127	up
Cg10456	0	13.9749	35.2924	0	0	1.63975	16.4224	0.546585	- && sp|Q9Y4D7|PLXD1_HUMAN Plexin-D1 OS=Homo sapiens OX=9606 GN=PLXND1 PE=1 SV=3 && PF01833:IPT/TIG domain|PF01437:Plexin repeat	4.84286	0.0136537	0.19223	up
Cg17121	71.4952	127.637	136.892	405.226	131.314	313.193	112.008	283.244	- && sp|Q9DCM4|DNAL4_MOUSE Dynein axonemal light chain 4 OS=Mus musculus OX=10090 GN=Dnal4 PE=3 SV=2 && PF01221:Dynein light chain type 1	-1.33727	0.0136947	0.19262	down
novel.2788	361.051	108.073	258.811	149.905	46.9664	17.2174	242.645	71.3628	- && - && -	1.76693	0.0137027	0.19262	up
Cg28928	63.1541	16.7699	259.881	4.83563	30.672	36.0746	113.268	23.8607	- && sp|P48180|ACH1_CAEEL Acetylcholine receptor subunit alpha-type acr-16 OS=Caenorhabditis elegans OX=6239 GN=acr-16 PE=2 SV=1 && PF02931:Neurotransmitter-gated ion-channel ligand binding domain|PF02932:Neurotransmitter-gated ion-channel transmembrane region	2.244	0.0137123	0.19262	up
Cg24554	1773.08	3394.97	2288.66	503.873	442.826	1883.26	2485.57	943.319	- && sp|P00450|CERU_HUMAN Ceruloplasmin OS=Homo sapiens OX=9606 GN=CP PE=1 SV=1 && PF04457:MJ1316 RNA cyclic group end recognition domain|PF10469:AKAP7 2'5' RNA ligase-like domain|PF07732:Multicopper oxidase	1.39752	0.0137789	0.193266	up
Cg27707	4.76635	0	0	51.2577	5.75099	8.19877	1.58878	21.7358	- && sp|O95436|NPT2B_HUMAN Sodium-dependent phosphate transport protein 2B OS=Homo sapiens OX=9606 GN=SLC34A2 PE=1 SV=3 && PF02690:Na+/Pi-cotransporter	-3.83107	0.0138395	0.19397	down
novel.6661	1.19159	0	0	25.1453	0	15.5777	0.397196	13.5743	- && - && -	-5.16134	0.0138948	0.194449	down
novel.4402	0	35.4031	0	721.476	460.079	389.442	11.801	523.666	- && - && -	-5.46715	0.0138994	0.194449	down
Cg22646	0	15.8382	14.9725	96.7126	23.004	48.3728	10.2703	56.0298	- && sp|Q5R514|UMPS_PONAB Uridine 5'-monophosphate synthase OS=Pongo abelii OX=9601 GN=UMPS PE=2 SV=1 && PF00215:Orotidine 5'-phosphate decarboxylase / HUMPS family|PF00156:Phosphoribosyl transferase domain	-2.43531	0.0139048	0.194449	down
Cg05537	172.78	213.35	290.895	132.496	59.4269	95.9256	225.675	95.9496	- && - && -	1.23424	0.0139252	0.19459	up
Cg19389	195219	259141	202822	88852.8	65252.7	159578	219061	104561	- && sp|O17320|ACT_CRAGI Actin OS=Crassostrea gigas OX=29159 PE=2 SV=1 && PF00022:Actin	1.06698	0.0139396	0.194645	up
Cg27747	16.6822	13.9749	10.6947	58.0276	60.3854	27.8758	13.7839	48.7629	- && sp|Q9HCS5|E41LA_HUMAN Band 4.1-like protein 4A OS=Homo sapiens OX=9606 GN=EPB41L4A PE=1 SV=2 && PF09379:FERM N-terminal domain|PF00373:FERM central domain|PF09380:FERM C-terminal PH-like domain	-1.82305	0.013953	0.194686	down
novel.5906	1.19159	20.4965	16.042	29.9809	183.073	10.6584	12.5767	74.5709	- && - && -	-2.55773	0.0139823	0.194868	down
Cg09042	206.145	273.908	263.089	295.941	914.408	507.504	247.714	572.617	- && sp|P59910|DJB13_HUMAN DnaJ homolog subfamily B member 13 OS=Homo sapiens OX=9606 GN=DNAJB13 PE=1 SV=1 && PF01556:DnaJ C terminal domain|PF00226:DnaJ domain	-1.20845	0.0139868	0.194868	down
Cg05927	8.34111	10.2483	10.6947	52.2248	27.7965	34.4348	9.76135	38.152	- && - && -	-1.96372	0.0139972	0.194869	down
Cg20764	315.771	439.744	329.396	558.032	1270.97	568.175	361.637	799.059	- && sp|Q26630|IDLC_STRPU 33 kDa inner dynein arm light chain, axonemal OS=Strongylocentrotus purpuratus OX=7668 PE=1 SV=1 && PF10211:Axonemal dynein light chain	-1.14323	0.0140296	0.195174	down
Cg13332	30.9813	72.6695	86.6269	204.064	140.899	141.019	63.4259	161.994	- && sp|Q28FE4|MORN5_XENTR MORN repeat-containing protein 5 OS=Xenopus tropicalis OX=8364 GN=morn5 PE=2 SV=1 && PF02493:MORN repeat	-1.34973	0.0140683	0.195568	down
Cg15859	16.6822	26.0865	14.9725	45.4549	127.48	32.7951	19.2471	68.5768	- && sp|Q91XY4|PCDG4_MOUSE Protocadherin gamma-A4 OS=Mus musculus OX=10090 GN=Pcdhga4 PE=1 SV=1 && PF00028:Cadherin domain|PF08266:Cadherin-like	-1.8279	0.0140818	0.195609	down
Cg18536	1162.99	820.793	626.708	437.141	161.028	508.324	870.163	368.831	- && sp|Q9U943|APLP_LOCMI Apolipophorins OS=Locusta migratoria OX=7004 PE=1 SV=2 && PF09172:Domain of unknown function (DUF1943)|PF00094:von Willebrand factor type D domain|PF01347:Lipoprotein amino terminal region	1.23782	0.0141734	0.19665	up
Cg20308	34.556	68.9429	57.7512	80.2715	254.961	114.783	53.7501	150.005	- && sp|Q7LFX5|CHSTF_HUMAN Carbohydrate sulfotransferase 15 OS=Homo sapiens OX=9606 GN=CHST15 PE=1 SV=1 && PF00685:Sulfotransferase domain	-1.47757	0.0141777	0.19665	down
Cg19517	132.266	185.4	126.197	43.5207	50.8004	86.907	147.955	60.4094	- && sp|O94988|FA13A_HUMAN Protein FAM13A OS=Homo sapiens OX=9606 GN=FAM13A PE=1 SV=2 && PF00620:RhoGAP domain	1.29063	0.0142423	0.197306	up
novel.4741	1.19159	2.79498	12.8336	54.1591	28.755	17.2174	5.60673	33.3772	- && - && -	-2.56994	0.0142612	0.197306	down
Cg08167	5.95794	12.1116	3.2084	32.8823	39.2984	27.056	7.09264	33.0789	- && sp|Q6ZXV5|TMTC3_HUMAN Protein O-mannosyl-transferase TMTC3 OS=Homo sapiens OX=9606 GN=TMTC3 PE=1 SV=2 && PF13181:Tetratricopeptide repeat|PF13414:TPR repeat|PF08409:Domain of unknown function (DUF1736)	-2.20846	0.014264	0.197306	down
novel.491	418.247	47.5147	316.562	135.398	40.2569	55.7517	260.775	77.1354	- && - && -	1.75715	0.0142679	0.197306	up
Cg28786	119.159	83.8495	128.336	25.1453	64.2194	32.7951	110.448	40.7199	- && sp|Q9GZT9|EGLN1_HUMAN Egl nine homolog 1 OS=Homo sapiens OX=9606 GN=EGLN1 PE=1 SV=1 && PF01753:MYND finger|PF13640:2OG-Fe(II) oxygenase superfamily	1.43989	0.0143035	0.197306	up
Cg00229	57.1962	96.8927	111.225	39.6522	25.8795	31.9752	88.4378	32.5023	- && sp|P23467|PTPRB_HUMAN Receptor-type tyrosine-protein phosphatase beta OS=Homo sapiens OX=9606 GN=PTPRB PE=1 SV=3 && PF00102:Protein-tyrosine phosphatase	1.44561	0.0143111	0.197306	up
Cg19932	3.57476	8.38495	0	33.8494	45.0494	9.83853	3.98657	29.5791	- && - && -	-2.87158	0.014318	0.197306	down
Cg04339	127.5	161.177	210.685	35.7837	78.5969	86.0871	166.454	66.8226	- && sp|Q6EDY6|CARL1_MOUSE F-actin-uncapping protein LRRC16A OS=Mus musculus OX=10090 GN=Carmil1 PE=1 SV=2 && PF16000:CARMIL C-terminus|PF17888:Carmil pleckstrin homology domain	1.31556	0.0143879	0.198099	up
Cg15858	548.13	113.663	333.674	168.28	103.518	99.2052	331.822	123.668	- && - && PF00531:Death domain	1.4234	0.0144025	0.198154	up
novel.1560	1.19159	0	4.27787	17.4083	23.9625	13.118	1.82315	18.1629	- && - && PF00589:Phage integrase family	-3.33282	0.0144551	0.198731	down
Cg19337	1.19159	9.31661	13.9031	0	0	0	8.13709	0	- && - && PF00001:7 transmembrane receptor (rhodopsin family)	5.60169	0.014578	1	up
Cg19241	0	0	0	1.93425	17.253	6.55902	0	8.58208	- && - && -	-5.46089	0.0145802	1	down
Cg04314	807.896	220.804	342.23	180.853	205.119	175.454	456.976	187.142	- && sp|Q503M4|MT12B_DANRE Monocarboxylate transporter 12-B OS=Danio rerio OX=7955 GN=slc16a12b PE=2 SV=1 && PF09606:ARC105 or Med15 subunit of Mediator complex non-fungal	1.28722	0.0146312	0.200831	up
Cg22140	72.6868	57.763	83.4185	207.932	149.526	132	71.2894	163.153	- && sp|O08795|GLU2B_MOUSE Glucosidase 2 subunit beta OS=Mus musculus OX=10090 GN=Prkcsh PE=1 SV=1 && PF13015:Glucosidase II beta subunit-like protein|PF12999:Glucosidase II beta subunit-like	-1.19505	0.01464	0.200831	down
Cg28762	234.743	205.897	196.782	70.6002	83.3894	132	212.474	95.33	- && sp|Q96CN9|GCC1_HUMAN GRIP and coiled-coil domain-containing protein 1 OS=Homo sapiens OX=9606 GN=GCC1 PE=1 SV=1 && PF01465:GRIP domain	1.15432	0.0146646	0.200964	up
Cg26709	14.299	28.8815	31.0146	103.483	60.3854	59.0312	24.7317	74.2997	- && sp|Q66KE9|F161A_XENLA Protein FAM161A OS=Xenopus laevis OX=8355 GN=fam161a PE=2 SV=1 && PF10595:Uncharacterised protein family UPF0564	-1.58177	0.014676	0.200964	down
Cg18290	224.018	495.643	207.477	879.118	431.324	850.213	309.046	720.218	- && sp|Q08DP0|PGM1_BOVIN Phosphoglucomutase-1 OS=Bos taurus OX=9913 GN=PGM1 PE=2 SV=1 && PF02880:Phosphoglucomutase/phosphomannomutase, alpha/beta/alpha domain III|PF02879:Phosphoglucomutase/phosphomannomutase, alpha/beta/alpha domain II|PF02878:Phosphoglucomutase/phosphomannomutase, alpha/beta/alpha domain I	-1.2197	0.0146819	0.200964	down
Cg28769	23.8317	23.2915	22.4588	120.891	29.7135	74.6088	23.194	75.071	- && - && PF18701:Family of unknown function (DUF5641)|PF05380:Pao retrotransposon peptidase	-1.69454	0.014699	0.200989	down
Cg19800	1.19159	3.72664	0	21.2768	17.253	13.118	1.63941	17.2159	- && - && -	-3.35481	0.0147052	0.200989	down
Cg26751	129.883	116.458	280.2	776.602	181.156	452.572	175.514	470.11	- && sp|Q7ZT47|PSF1_XENLA DNA replication complex GINS protein PSF1 OS=Xenopus laevis OX=8355 GN=gins1 PE=1 SV=1 && PF05916:GINS complex protein	-1.42154	0.0147325	0.201092	down
Cg07269	38.1308	88.5078	79.1406	8.70414	24.921	27.8758	68.593	20.5003	- && - && PF12260:Protein-kinase domain of FAM69	1.74091	0.0147342	0.201092	up
Cg27965	0	4.6583	39.5703	117.022	55.5929	70.5095	14.7429	81.0416	- && - && PF00651:BTB/POZ domain	-2.45738	0.0147664	0.201185	down
Cg09392	0	0	0	3.86851	11.502	9.01865	0	8.12971	- && - && -	-5.38377	0.0147664	1	down
Cg20241	2347.43	1357.43	1346.46	711.805	748.587	1040.42	1683.77	833.606	- && sp|Q8WPW2|PDX1_SUBDO Pyridoxal 5'-phosphate synthase subunit SNZERR OS=Suberites domuncula OX=55567 GN=SNZERR PE=2 SV=2 && PF01174:SNO glutamine amidotransferase family|PF01680:SOR/SNZ family	1.01392	0.0147732	0.201185	up
novel.4791	26.2149	3.72664	29.9451	120.891	49.8419	57.3914	19.9622	76.0414	- && - && -	-1.93667	0.01479	0.201256	down
Cg19166	100.093	122.979	177.532	285.302	332.599	241.044	133.535	286.315	- && sp|Q5PQ44|CF299_XENLA Cilia- and flagella-associated protein 299 OS=Xenopus laevis OX=8355 GN=cfap299 PE=2 SV=1 && PF14713:Domain of unknown function (DUF4464)	-1.09967	0.0148021	0.201256	down
Cg09037	112.009	84.7811	75.9322	337.527	143.775	170.534	90.9075	217.279	- && sp|O43559|FRS3_HUMAN Fibroblast growth factor receptor substrate 3 OS=Homo sapiens OX=9606 GN=FRS3 PE=1 SV=3 && PF02174:PTB domain (IRS-1 type)	-1.25768	0.0148107	0.201256	down
Cg28774	16.6822	30.7448	20.3199	163.444	23.004	63.1306	22.5823	83.193	- && sp|O95714|HERC2_HUMAN E3 ubiquitin-protein ligase HERC2 OS=Homo sapiens OX=9606 GN=HERC2 PE=1 SV=2 && PF13519:von Willebrand factor type A domain|PF06701:Mib_herc2|PF02825:WWE domain	-1.87678	0.0148357	0.201361	down
Cg03488	169.205	216.145	159.351	37.7179	105.435	78.7082	181.567	73.9537	- && sp|Q04519|ASM_MOUSE Sphingomyelin phosphodiesterase OS=Mus musculus OX=10090 GN=Smpd1 PE=1 SV=2 && PF00149:Calcineurin-like phosphoesterase	1.29585	0.0148411	0.201361	up
Cg29146	1.19159	41.9247	3.2084	94.7784	63.2609	79.5281	15.4416	79.1891	- && sp|Q27874|PAT3_CAEEL Integrin beta pat-3 OS=Caenorhabditis elegans OX=6239 GN=pat-3 PE=1 SV=1 && PF08725:Integrin beta cytoplasmic domain|PF00362:Integrin beta chain VWA domain|PF18372:Integrin beta epidermal growth factor like domain 1	-2.34302	0.0148563	0.201361	down
Cg19606	28.5981	27.0182	43.8482	53.1919	161.986	77.0685	33.1548	97.4156	- && - && -	-1.55494	0.0148615	0.201361	down
novel.3271	0	0	0	7.73701	11.502	4.91926	0	8.05275	- && - && -	-5.36834	0.014877	1	down
Cg04228	0	13.0432	5.34734	5.80276	80.5139	44.2734	6.13019	43.53	- && - && -	-2.80745	0.0148809	0.201478	down
novel.635	344.369	226.394	220.31	145.069	130.356	84.4474	263.691	119.957	- && - && -	1.13674	0.0149194	0.201708	up
Cg18880	54.813	2.79498	55.6123	0	10.5435	0	37.7401	3.5145	- && sp|Q13231|CHIT1_HUMAN Chitotriosidase-1 OS=Homo sapiens OX=9606 GN=CHIT1 PE=1 SV=1 && PF01607:Chitin binding Peritrophin-A domain|PF00704:Glycosyl hydrolases family 18	3.43465	0.0149552	0.202046	up
Cg05737	120.35	46.583	65.2375	178.918	254.002	142.659	77.3903	191.86	- && sp|Q32LE4|GGCT_BOVIN Gamma-glutamylcyclotransferase OS=Bos taurus OX=9913 GN=GGCT PE=2 SV=1 && PF13772:AIG2-like family	-1.31296	0.0149903	0.202239	down
Cg16558	9.5327	37.2664	11.7641	46.4221	71.8874	86.907	19.5211	68.4055	- && - && -	-1.79875	0.0149911	0.202239	down
Cg22130	0	0	0	15.474	2.8755	6.55902	0	8.30285	- && sp|P49582|ACHA7_MOUSE Neuronal acetylcholine receptor subunit alpha-7 OS=Mus musculus OX=10090 GN=Chrna7 PE=1 SV=1 && PF02931:Neurotransmitter-gated ion-channel ligand binding domain|PF02932:Neurotransmitter-gated ion-channel transmembrane region	-5.41291	0.0150286	1	down
novel.6307	2.38317	0	0	19.3425	4.79249	18.0373	0.794392	14.0574	- && - && -	-4.23294	0.015049	0.202875	down
Cg16741	7.14952	5.58996	0	50.2906	18.2115	18.0373	4.2465	28.8464	- && sp|Q9GRC0|MOS_PATPE Serine/threonine-protein kinase mos OS=Patiria pectinifera OX=7594 GN=mos PE=1 SV=1 && PF00069:Protein kinase domain	-2.7668	0.0150797	0.203142	down
Cg17776	0	16.7699	6.4168	4.83563	135.148	31.1553	7.7289	57.0464	- && sp|P56404|AQP8_MOUSE Aquaporin-8 OS=Mus musculus OX=10090 GN=Aqp8 PE=2 SV=1 && PF00230:Major intrinsic protein	-2.86698	0.0151003	0.203187	down
Cg16536	100.093	122.979	105.877	361.705	181.156	195.951	109.65	246.271	- && sp|Q9Y483|MTF2_HUMAN Metal-response element-binding transcription factor 2 OS=Homo sapiens OX=9606 GN=MTF2 PE=1 SV=3 && PF00628:PHD-finger|PF18104:Jumonji domain-containing protein 2A Tudor domain	-1.16624	0.0151067	0.203187	down
Cg25892	125.117	31.6765	62.0291	190.524	286.591	124.621	72.9407	200.579	- && - && PF08445:FR47-like protein	-1.46299	0.0151156	0.203187	down
Cg29229	17.8738	22.3599	9.62521	67.6988	95.8499	21.3168	16.6196	61.6218	- && - && PF13306:BspA type Leucine rich repeat region (6 copies)	-1.88633	0.0151301	0.203236	down
Cg25086	70.3037	133.227	161.49	8.70414	75.7214	16.3975	121.674	33.6077	- && sp|Q5I0S8|ILEU_XENTR Leukocyte elastase inhibitor OS=Xenopus tropicalis OX=8364 GN=serpinb1 PE=2 SV=1 && PF00079:Serpin (serine protease inhibitor)	1.85892	0.0151571	0.203312	up
novel.4434	0	0	0	13.5398	6.70949	4.09939	0	8.11622	- && - && -	-5.37921	0.0151609	1	down
Cg26342	418.247	479.805	567.887	1556.11	659.447	886.287	488.647	1033.95	- && sp|P62312|LSM6_HUMAN U6 snRNA-associated Sm-like protein LSm6 OS=Homo sapiens OX=9606 GN=LSM6 PE=1 SV=1 && -	-1.08112	0.0151674	0.203312	down
Cg22564	7.14952	10.2483	7.48627	55.1262	25.8795	24.5963	8.29469	35.2007	- && - && PF01643:Acyl-ACP thioesterase	-2.07905	0.0151683	0.203312	down
Cg26794	4081.19	700.609	1980.65	263.058	1365.86	635.405	2254.15	754.775	- && sp|A6H584|CO6A5_MOUSE Collagen alpha-5(VI) chain OS=Mus musculus OX=10090 GN=Col6a5 PE=1 SV=4 && PF00092:von Willebrand factor type A domain	1.57836	0.0152037	0.20364	up
Cg21708	207.336	22.3599	3.2084	0	18.2115	11.4783	77.6348	9.89659	- && - && -	2.96855	0.0152258	0.20379	up
Cg24551	1149.88	400.614	1725.05	633.468	268.38	390.262	1091.85	430.703	- && - && PF00229:TNF(Tumour Necrosis Factor) family	1.3419	0.0153499	0.205305	up
Cg03040	1.19159	1.86332	0	3.86851	39.2984	4.91926	1.0183	16.0287	- && sp|Q91YD4|TRPM2_MOUSE Transient receptor potential cation channel subfamily M member 2 OS=Mus musculus OX=10090 GN=Trpm2 PE=1 SV=2 && PF00520:Ion transport protein|PF18139:SLOG in TRPM	-3.9552	0.0153762	0.20551	down
Cg15185	102.477	23.2915	13.9031	192.458	172.53	98.3853	46.557	154.458	- && - && PF13855:Leucine rich repeat	-1.73559	0.0154074	0.205758	down
Cg23244	759.041	722.037	562.54	230.176	420.781	360.746	681.206	337.234	- && sp|Q9VAT2|DCA10_DROME DDB1- and CUL4-associated factor 10 homolog OS=Drosophila melanogaster OX=7227 GN=CG1523 PE=1 SV=1 && -	1.01417	0.0154267	0.205758	up
Cg12339	9.5327	100.619	23.5283	115.088	163.903	184.472	44.5601	154.488	- && - && -	-1.7867	0.0154278	0.205758	down
Cg18805	0	7.45328	0	60.929	1.917	27.8758	2.48443	30.2406	- && - && PF00024:PAN domain	-3.56279	0.0154397	0.205771	down
Cg21029	364.626	505.892	340.091	261.124	164.862	149.218	403.536	191.735	- && - && PF04588:Hypoxia induced protein conserved region	1.07458	0.0154508	0.205772	up
Cg01122	0	0.931661	0	0	154.318	24.5963	0.310554	59.6382	- && sp|P42664|UVS2_XENLA Embryonic protein UVS.2 OS=Xenopus laevis OX=8355 PE=2 SV=2 && PF00629:MAM domain, meprin/A5/mu|PF00008:EGF-like domain|PF01400:Astacin (Peptidase family M12A)	-7.29633	0.0155649	0.207145	down
Cg05085	45.2803	77.3278	63.0986	10.6384	30.672	16.3975	61.9022	19.236	- && sp|Q93129|ACTC_BRABE Actin, cytoplasmic OS=Branchiostoma belcheri OX=7741 PE=2 SV=1 && PF00022:Actin	1.68888	0.0155833	0.207242	up
Cg16209	14.299	37.2664	45.9871	39.6522	232.915	70.5095	32.5175	114.359	- && sp|Q03412|UNC7_CAEEL Innexin unc-7 OS=Caenorhabditis elegans OX=6239 GN=unc-7 PE=1 SV=1 && PF00876:Innexin	-1.81065	0.0155978	0.207289	down
Cg11024	314.579	324.218	389.286	43.5207	80.5139	249.243	342.694	124.426	- && sp|Q96WM9|LAC2_BOTFU Laccase-2 OS=Botryotinia fuckeliana OX=40559 GN=lcc2 PE=2 SV=1 && PF07731:Multicopper oxidase|PF00394:Multicopper oxidase|PF07732:Multicopper oxidase	1.45954	0.0156403	0.207706	up
Cg17645	2.38317	0.931661	0	26.1124	13.419	4.91926	1.10495	14.8169	- && - && -	-3.77435	0.0156883	0.208195	down
Cg04309	100.093	112.731	127.267	294.006	361.354	135.28	113.364	263.547	- && sp|Q86YT5|S13A5_HUMAN Solute carrier family 13 member 5 OS=Homo sapiens OX=9606 GN=SLC13A5 PE=1 SV=1 && PF00939:Sodium:sulfate symporter transmembrane region	-1.2161	0.0157092	0.208324	down
Cg10436	101.285	14.9066	7.48627	188.59	267.421	53.292	41.2259	169.768	- && - && PF00965:Tissue inhibitor of metalloproteinase	-2.0473	0.015733	0.208387	down
novel.187	2.38317	10.2483	5.34734	36.7508	2.8755	77.0685	5.99293	38.8983	- && - && -	-2.6864	0.0157361	0.208387	down
Cg06051	1269.04	2649.64	2822.32	588.013	709.289	1600.4	2247	965.901	- && sp|Q9DBM1|GPTC1_MOUSE G patch domain-containing protein 1 OS=Mus musculus OX=10090 GN=Gpatch1 PE=2 SV=1 && PF02494:HYR domain|PF01585:G-patch domain|PF00058:Low-density lipoprotein receptor repeat class B|PF07713:Protein of unknown function (DUF1604)	1.21789	0.0157599	0.208554	up
novel.779	0	0	0	9.67126	5.75099	8.19877	0	7.87368	- && P10978.1 RecName: Full=Retrovirus-related Pol polyprotein from transposon TNT 1-94; Includes: RecName: Full=Protease; Includes: RecName: Full=Reverse transcriptase; Includes: RecName: Full=Endonuclease && PF00665:Integrase core domain	-5.33724	0.0157875	1	down
Cg04328	79894.7	30141.1	36845.3	19384.1	25963.8	23456.7	48960.4	22934.9	- && - && -	1.09406	0.0158195	0.209195	up
Cg20416	19.0654	9.31661	160.42	13.5398	10.5435	13.118	62.934	12.4004	- && sp|Q8R4V5|OIT3_MOUSE Oncoprotein-induced transcript 3 protein OS=Mus musculus OX=10090 GN=Oit3 PE=2 SV=2 && PF00094:von Willebrand factor type D domain	2.34266	0.0158544	0.209508	up
novel.4870	0	0	0	0	19.17	11.4783	0	10.2161	- && - && -	-5.71327	0.015888	1	down
Cg18341	2.38317	1.86332	2.13893	15.474	10.5435	24.5963	2.12848	16.8713	- && - && -	-2.99416	0.0159087	0.209685	down
Cg05702	47.6635	104.346	52.4039	189.557	158.152	144.298	68.1378	164.002	- && sp|Q13416|ORC2_HUMAN Origin recognition complex subunit 2 OS=Homo sapiens OX=9606 GN=ORC2 PE=1 SV=2 && PF04084:Origin recognition complex subunit 2	-1.2631	0.0159535	0.210076	down
novel.7047	0	0	4.27787	20.3097	8.62649	24.5963	1.42596	17.8442	- && - && -	-3.65115	0.0160004	0.210501	down
Cg27041	76.2616	89.4394	204.268	319.152	381.482	198.41	123.323	299.681	- && sp|Q8CEQ0|CDKL1_MOUSE Cyclin-dependent kinase-like 1 OS=Mus musculus OX=10090 GN=Cdkl1 PE=2 SV=1 && PF00069:Protein kinase domain	-1.28045	0.0160082	0.210501	down
Cg17171	19.0654	41.9247	12.8336	88.9756	94.8914	49.1926	24.6079	77.6865	- && sp|P33610|PRI2_MOUSE DNA primase large subunit OS=Mus musculus OX=10090 GN=Prim2 PE=1 SV=1 && PF04104:Eukaryotic and archaeal DNA primase, large subunit	-1.65067	0.0160552	0.210971	down
Cg07910	142.99	8.38495	55.6123	16.4411	22.0455	4.09939	68.9959	14.1953	- && sp|Q13490|BIRC2_HUMAN Baculoviral IAP repeat-containing protein 2 OS=Homo sapiens OX=9606 GN=BIRC2 PE=1 SV=2 && PF00653:Inhibitor of Apoptosis domain|PF13920:Zinc finger, C3HC4 type (RING finger)	2.28335	0.0160879	0.211187	up
Cg15208	0	0.931661	4.27787	1.93425	44.0909	16.3975	1.73651	20.8076	- && - && PF00335:Tetraspanin family	-3.57501	0.0161258	0.211412	down
Cg00271	1017.62	1617.36	840.601	469.056	346.018	786.262	1158.53	533.779	- && - && -	1.11778	0.0161381	0.211412	up
novel.4568	1.19159	0	1.06947	5.80276	22.0455	9.83853	0.753685	12.5623	- && - && -	-4.10944	0.0161511	0.211412	down
Cg19232	15.4906	7.45328	1.06947	0	0	0	8.00446	0	- && sp|Q8R508|FAT3_RAT Protocadherin Fat 3 OS=Rattus norvegicus OX=10116 GN=Fat3 PE=1 SV=1 && PF00028:Cadherin domain	5.5729	0.0161834	1	up
Cg27420	40.514	49.378	23.5283	90.9099	128.439	79.5281	37.8068	99.6256	- && sp|P17635|FMO2_RABIT Dimethylaniline monooxygenase [N-oxide-forming] 2 OS=Oryctolagus cuniculus OX=9986 GN=FMO2 PE=1 SV=3 && PF00743:Flavin-binding monooxygenase-like	-1.39559	0.0162625	0.212445	down
Cg07168	1108.18	321.423	645.958	276.598	405.445	165.615	691.852	282.553	- && - && PF08718:Glycolipid transfer protein (GLTP)	1.29191	0.0162734	0.212445	up
Cg10486	52.4298	36.3348	19.2504	92.8441	118.854	81.1679	36.005	97.6219	- && - && -	-1.44122	0.0162833	0.212445	down
Cg30664	0	0	0	1.93425	0	31.1553	0	11.0299	- && - && -	-5.82689	0.0162868	0.212445	down
Cg30504	34.556	6.52162	8.55574	84.14	85.3064	27.056	16.5445	65.5008	- && - && PF00965:Tissue inhibitor of metalloproteinase	-1.99599	0.0163017	0.212445	down
Cg05667	69.1121	58.6946	71.6543	178.918	265.504	72.9691	66.487	172.464	- && - && PF01490:Transmembrane amino acid transporter protein	-1.37481	0.0163035	0.212445	down
Cg22662	38.1308	0	0	0	0	0	12.7103	0	- && - && -	6.23882	0.016348	0.212877	up
Cg18792	811.471	796.57	663.07	169.247	436.117	439.454	757.037	348.273	- && sp|P98081|DAB_DROME Protein disabled OS=Drosophila melanogaster OX=7227 GN=Dab PE=1 SV=2 && PF00640:Phosphotyrosine interaction domain (PTB/PID)	1.11978	0.0163666	0.212971	up
Cg07305	0	0	0	0.967126	23.9625	2.45963	0	9.12974	- && sp|E9PTA2|TRPM2_RAT Transient receptor potential cation channel subfamily M member 2 OS=Rattus norvegicus OX=10116 GN=Trpm2 PE=1 SV=3 && PF18139:SLOG in TRPM|PF00520:Ion transport protein	-5.54898	0.0163832	1	down
Cg24277	102.477	97.8244	32.084	20.3097	28.755	27.056	77.4616	25.3735	- && sp|Q4LBB9|OCTB2_DROME Octopamine receptor beta-2R OS=Drosophila melanogaster OX=7227 GN=Octbeta2R PE=2 SV=2 && PF00001:7 transmembrane receptor (rhodopsin family)	1.60948	0.0164025	0.213289	up
Cg06267	7.14952	8.38495	4.27787	56.0933	23.9625	15.5777	6.60411	31.8778	- && - && -	-2.26618	0.0164317	0.213522	down
Cg18822	52.4298	96.8927	87.6963	223.406	213.745	120.522	79.0063	185.891	- && sp|Q6PJF5|RHDF2_HUMAN Inactive rhomboid protein 2 OS=Homo sapiens OX=9606 GN=RHBDF2 PE=1 SV=2 && PF01694:Rhomboid family	-1.23146	0.0164924	0.213963	down
Cg07150	194.229	188.195	178.601	35.7837	122.688	66.4101	187.008	74.9605	- && sp|Q99MP8|BRAP_MOUSE BRCA1-associated protein OS=Mus musculus OX=10090 GN=Brap PE=1 SV=1 && PF13639:Ring finger domain|PF07576:BRCA1-associated protein 2|PF02148:Zn-finger in ubiquitin-hydrolases and other protein	1.31918	0.016493	0.213963	up
Cg29156	14.299	25.1548	27.8062	23.211	149.526	66.4101	22.42	79.7156	- && sp|Q6DC93|PEF1_DANRE Peflin OS=Danio rerio OX=7955 GN=pef1 PE=2 SV=1 && -	-1.82685	0.016539	0.214053	down
Cg21590	238.317	141.612	355.063	79.3044	151.443	68.8697	244.998	99.8723	- && - && -	1.29503	0.0165401	0.214053	up
Cg25828	60.771	121.116	77.0017	9.67126	18.2115	50.0125	86.2962	25.9651	- && - && PF00144:Beta-lactamase	1.72772	0.0165412	0.214053	up
Cg25198	13.1075	14.9066	0	0	0	0	9.33801	0	- && - && PF00643:B-box zinc finger	5.79826	0.0165487	1	up
Cg03160	3.57476	0	0	27.0795	1.917	24.5963	1.19159	17.8643	- && - && PF18738:DZIP3/ hRUL138-like HEPN|PF12796:Ankyrin repeats (3 copies)	-3.97418	0.0165571	0.21411	down
Cg21206	17.8738	5.58996	12.8336	28.0467	70.9289	39.3541	12.0991	46.1099	- && - && PF08357:SEFIR domain	-1.94028	0.0165937	0.214287	down
Cg27974	29.7897	60.5579	110.155	2.90138	12.4605	31.9752	66.8343	15.779	- && sp|B0V3H4|CS054_DANRE UPF0692 protein C19orf54 homolog OS=Danio rerio OX=7955 GN=si:dkey-233h2.2 PE=2 SV=1 && -	2.07526	0.0166156	0.214288	up
Cg05680	26.2149	44.7197	160.42	33.8494	14.3775	12.2982	77.1182	20.175	- && - && PF04923:Ninjurin	1.93775	0.0166194	0.214288	up
novel.1322	0	2.79498	0	6.76988	5.75099	35.2547	0.931661	15.9252	- && - && -	-4.0229	0.0166474	0.214288	down
Cg26350	13.1075	94.0977	8.55574	394.588	42.1739	86.0871	38.587	174.283	- && sp|Q32NM1|CCNOB_XENLA Cyclin-O protein B OS=Xenopus laevis OX=8355 GN=ccno-b PE=2 SV=1 && PF00134:Cyclin, N-terminal domain	-2.16911	0.0166501	0.214288	down
novel.3838	0	0.931661	0	12.5726	1.917	17.2174	0.310554	10.569	- && - && -	-4.8021	0.0166509	0.214288	down
Cg14767	140.607	293.473	185.018	227.275	972.876	395.181	206.366	531.777	- && sp|P20073|ANXA7_HUMAN Annexin A7 OS=Homo sapiens OX=9606 GN=ANXA7 PE=1 SV=3 && PF00191:Annexin	-1.36454	0.0166863	0.21435	down
Cg17527	53.6214	90.3711	116.572	369.442	100.642	213.168	86.8548	227.751	- && - && PF07412:Geminin	-1.38949	0.0166949	0.21435	down
Cg28963	243.084	570.176	609.596	98.6469	229.081	262.361	474.285	196.696	- && sp|P50416|CPT1A_HUMAN Carnitine O-palmitoyltransferase 1, liver isoform OS=Homo sapiens OX=9606 GN=CPT1A PE=1 SV=2 && PF00755:Choline/Carnitine o-acyltransferase	1.26962	0.0167174	0.21435	up
novel.2785	300.28	60.5579	202.129	76.403	74.7629	53.292	187.656	68.1526	- && - && PF00643:B-box zinc finger	1.46044	0.016718	0.21435	up
Cg25011	4.76635	1.86332	5.34734	12.5726	35.4645	22.1367	3.99234	23.3913	- && - && PF00001:7 transmembrane receptor (rhodopsin family)	-2.56337	0.0167244	0.21435	down
Cg05058	54.813	4.6583	9.62521	3.86851	0	3.27951	23.0322	2.38267	- && - && -	3.26167	0.0167432	0.214391	up
Cg15393	78.6448	68.0112	98.391	166.346	248.251	137.739	81.6823	184.112	- && sp|Q7RTX9|MOT14_HUMAN Monocarboxylate transporter 14 OS=Homo sapiens OX=9606 GN=SLC16A14 PE=2 SV=1 && PF07690:Major Facilitator Superfamily	-1.17259	0.0167506	0.214391	down
Cg10016	452.803	740.67	285.548	72.5345	340.267	139.379	493.007	184.06	- && sp|Q9HAT2|SIAE_HUMAN Sialate O-acetylesterase OS=Homo sapiens OX=9606 GN=SIAE PE=1 SV=1 && PF03629:Carbohydrate esterase, sialic acid-specific acetylesterase	1.42202	0.0167824	0.214652	up
Cg20414	75.07	81.9861	51.3344	83.1729	321.097	150.038	69.4635	184.769	- && sp|A1L157|TSN11_HUMAN Tetraspanin-11 OS=Homo sapiens OX=9606 GN=TSPAN11 PE=2 SV=2 && PF00335:Tetraspanin family	-1.41076	0.0167948	0.214664	down
Cg14633	2.38317	9.31661	2.13893	12.5726	60.3854	14.7578	4.61291	29.2386	- && - && -	-2.64175	0.0168442	0.215148	down
Cg07099	21.4486	45.6514	20.3199	126.694	54.6344	77.0685	29.1399	86.1321	- && sp|Q1T7B9|CENPM_CHICK Centromere protein M OS=Gallus gallus OX=9031 GN=CENPM PE=1 SV=1 && PF11111:Centromere protein M (CENP-M)	-1.55749	0.0168608	0.215214	down
Cg15834	1.19159	0	0	23.211	7.66799	1.63975	0.397196	10.8396	- && sp|Q15822|ACHA2_HUMAN Neuronal acetylcholine receptor subunit alpha-2 OS=Homo sapiens OX=9606 GN=CHRNA2 PE=1 SV=2 && PF02932:Neurotransmitter-gated ion-channel transmembrane region|PF02931:Neurotransmitter-gated ion-channel ligand binding domain	-4.83371	0.0168729	0.215221	down
Cg07013	5.95794	25.1548	12.8336	0	2.8755	0	14.6488	0.958499	- && sp|O61366|GPRS_DROME Serine-enriched protein OS=Drosophila melanogaster OX=7227 GN=gprs PE=4 SV=3 && PF00651:BTB/POZ domain	3.96579	0.0169111	0.215438	up
Cg16211	25.0233	30.7448	35.2924	75.4359	121.729	54.1119	30.3535	83.759	- && sp|Q03412|UNC7_CAEEL Innexin unc-7 OS=Caenorhabditis elegans OX=6239 GN=unc-7 PE=1 SV=1 && PF00876:Innexin	-1.46202	0.0169129	0.215438	down
Cg27780	1606.26	296.268	663.07	2390.74	1781.85	2212.03	855.199	2128.2	- && sp|A6QLI0|EPDR1_BOVIN Mammalian ependymin-related protein 1 OS=Bos taurus OX=9913 GN=EPDR1 PE=2 SV=1 && PF00811:Ependymin	-1.31582	0.0169445	0.215693	down
Cg17027	14.299	17.7016	5.34734	67.6988	24.921	50.0125	12.4493	47.5441	- && sp|O05218|YWRD_BACSU Glutathione hydrolase-like YwrD proenzyme OS=Bacillus subtilis (strain 168) OX=224308 GN=ywrD PE=1 SV=1 && PF01019:Gamma-glutamyltranspeptidase	-1.93011	0.0169588	0.215729	down
Cg28884	15.4906	47.5147	50.265	0	9.58499	9.83853	37.7568	6.47451	- && - && -	2.53882	0.0169902	0.215982	up
Cg21106	106.051	44.7197	86.6269	13.5398	41.2154	22.1367	79.1326	25.6306	- && sp|Q9UGM3|DMBT1_HUMAN Deleted in malignant brain tumors 1 protein OS=Homo sapiens OX=9606 GN=DMBT1 PE=1 SV=2 && PF00530:Scavenger receptor cysteine-rich domain	1.6253	0.0170148	0.216147	up
Cg23490	0	13.9749	117.641	0.967126	0	0	43.8721	0.322375	- && - && -	7.06807	0.0170354	0.216149	up
Cg21090	1988.76	3289.69	2886.49	841.4	845.396	2055.43	2721.65	1247.41	- && sp|Q3SYV4|CAP1_BOVIN Adenylyl cyclase-associated protein 1 OS=Bos taurus OX=9913 GN=CAP1 PE=2 SV=3 && PF01213:Adenylate cyclase associated (CAP) N terminal|PF00188:Cysteine-rich secretory protein family|PF08603:Adenylate cyclase associated (CAP) C terminal	1.12539	0.017038	0.216149	up
Cg14869	114.392	139.749	17.1115	440.042	165.82	227.106	90.4176	277.656	- && - && -	-1.61778	0.0170504	0.21616	down
Cg17743	0	0	0	26.1124	0	4.91926	0	10.3439	- && - && PF03281:Mab-21 protein	-5.72956	0.0170608	1	down
Cg02028	1.19159	1.86332	0	3.86851	39.2984	4.09939	1.0183	15.7554	- && - && PF00059:Lectin C-type domain	-3.93059	0.0171234	0.216798	down
Cg22312	116.776	102.483	80.2101	312.382	122.688	261.541	99.8228	232.204	- && sp|P07943|ALDR_RAT Aldo-keto reductase family 1 member B1 OS=Rattus norvegicus OX=10116 GN=Akr1b1 PE=1 SV=3 && PF00248:Aldo/keto reductase family	-1.21854	0.0171238	0.216798	down
novel.6219	0	0.931661	0	0	35.4645	4.91926	0.310554	13.4612	- && - && -	-5.14787	0.0171692	0.217183	down
Cg09899	0	0	5.34734	24.1782	18.2115	15.5777	1.78245	19.3224	- && - && -	-3.44176	0.0171775	0.217183	down
Cg23699	456.378	110.868	204.268	67.6988	129.397	96.7455	257.171	97.9472	- && sp|Q9VEN1|FLNA_DROME Filamin-A OS=Drosophila melanogaster OX=7227 GN=cher PE=1 SV=2 && PF00307:Calponin homology (CH) domain|PF00630:Filamin/ABP280 repeat	1.3913	0.0172301	0.217554	up
Cg00373	66.7289	54.968	59.8902	19.3425	25.8795	18.8572	60.529	21.3597	- && - && PF13639:Ring finger domain	1.50317	0.0172853	0.217901	up
Cg25107	276.448	207.76	236.352	134.431	117.895	97.5654	240.187	116.63	- && sp|Q6GLP4|RMD5A_XENLA E3 ubiquitin-protein ligase RMND5A OS=Xenopus laevis OX=8355 GN=rmnd5a PE=1 SV=1 && PF13445:RING-type zinc-finger|PF10607:CTLH/CRA C-terminal to LisH motif domain	1.04238	0.0172919	0.217901	up
novel.5628	0	0	0	9.67126	7.66799	5.73914	0	7.6928	- && - && -	-5.30273	0.0173016	1	down
Cg05202	0	0	4.27787	18.3754	38.3399	2.45963	1.42596	19.725	- && - && PF02816:Alpha-kinase family	-3.79214	0.017309	0.217901	down
Cg01159	89.369	120.184	242.769	27.0795	45.0494	88.5468	150.774	53.5586	- && sp|O14522|PTPRT_HUMAN Receptor-type tyrosine-protein phosphatase T OS=Homo sapiens OX=9606 GN=PTPRT PE=1 SV=6 && PF00102:Protein-tyrosine phosphatase	1.49049	0.0173103	0.217901	up
Cg24499	195.42	159.314	191.435	499.037	305.761	309.094	182.056	371.297	- && sp|P35559|IDE_RAT Insulin-degrading enzyme OS=Rattus norvegicus OX=10116 GN=Ide PE=1 SV=1 && PF16187:Middle or third domain of peptidase_M16|PF00675:Insulinase (Peptidase family M16)|PF05193:Peptidase M16 inactive domain	-1.02844	0.0173157	0.217901	down
Cg28046	237.126	558.996	291.965	92.8441	97.7669	246.783	362.696	145.798	- && sp|P70031|CCKAR_XENLA Cholecystokinin receptor OS=Xenopus laevis OX=8355 GN=cckar PE=2 SV=1 && PF00001:7 transmembrane receptor (rhodopsin family)	1.31402	0.0173333	0.217976	up
novel.3664	550.513	334.466	707.987	1856.88	900.989	781.343	530.989	1179.74	- && - && -	-1.15189	0.0173703	0.218295	down
Cg24491	86.9859	91.3027	106.947	297.875	141.858	195.951	95.0784	211.894	- && sp|Q9D428|GOG7B_MOUSE Golgin subfamily A member 7B OS=Mus musculus OX=10090 GN=GOLGA7B PE=1 SV=1 && PF10256:Golgin subfamily A member 7/ERF4 family	-1.15583	0.0174571	0.219238	down
Cg25238	41.7056	48.4463	37.4314	57.0605	220.455	85.2672	42.5278	120.927	- && - && PF01607:Chitin binding Peritrophin-A domain	-1.50633	0.0175308	0.219909	down
Cg11954	16.6822	3.72664	3.2084	41.5864	33.5475	31.9752	7.87242	35.703	- && - && -	-2.19998	0.017534	0.219909	down
Cg23132	10.7243	0	17.1115	0	0	0	9.27859	0	- && - && -	5.78607	0.0175867	1	up
novel.5503	2.38317	0	0	38.6851	0.958499	8.19877	0.794392	15.9474	- && - && -	-4.40407	0.017611	0.22053	down
Cg10798	78.6448	6.52162	739.002	3.86851	41.2154	4.91926	274.723	16.6677	- && - && -	4.04403	0.0176121	0.22053	up
Cg06752	60.771	73.6012	17.1115	37.7179	357.52	137.739	50.4945	177.659	- && - && -	-1.81389	0.0176188	0.22053	down
Cg29998	13.1075	20.4965	19.2504	59.9618	43.1324	58.2113	17.6181	53.7685	- && sp|Q32ZE2|AA2BR_RABIT Adenosine receptor A2b OS=Oryctolagus cuniculus OX=9986 GN=ADORA2B PE=2 SV=1 && PF00001:7 transmembrane receptor (rhodopsin family)	-1.60587	0.0176519	0.220536	down
Cg21744	197.803	181.674	310.146	29.0138	56.5514	159.876	229.874	81.8138	- && sp|Q96BD0|SO4A1_HUMAN Solute carrier organic anion transporter family member 4A1 OS=Homo sapiens OX=9606 GN=SLCO4A1 PE=1 SV=2 && PF03137:Organic Anion Transporter Polypeptide (OATP) family	1.48751	0.0176525	0.220536	up
Cg19702	36.9392	50.3097	43.8482	254.354	44.0909	97.5654	43.699	132.004	- && sp|A8ZSE7|END4_DESOH Probable endonuclease 4 OS=Desulfococcus oleovorans (strain DSM 6200 / JCM 39069 / Hxd3) OX=96561 GN=nfo PE=3 SV=1 && PF01261:Xylose isomerase-like TIM barrel	-1.59309	0.0176648	0.220536	down
Cg05095	1823.13	722.969	859.852	424.568	669.032	476.349	1135.32	523.316	- && - && PF00071:Ras family	1.11707	0.0176665	0.220536	up
Cg28903	171.589	44.7197	125.128	62.8632	27.7965	19.6771	113.812	36.7789	- && sp|Q2KJ63|KLKB1_BOVIN Plasma kallikrein OS=Bos taurus OX=9913 GN=KLKB1 PE=2 SV=1 && PF00089:Trypsin|PF13519:von Willebrand factor type A domain	1.63051	0.0177066	0.220841	up
novel.6430	69.1121	43.788	170.045	35.7837	38.3399	15.5777	94.3151	29.9004	- && - && -	1.65975	0.0177145	0.220841	up
Cg21122	42.8971	12.1116	24.5977	59.9618	43.1324	162.336	26.5355	88.4767	- && - && -	-1.74584	0.0177453	0.221079	down
Cg13113	320.537	138.817	103.738	89.9427	79.5554	50.0125	187.698	73.1702	- && sp|Q96LT4|SAMD8_HUMAN Sphingomyelin synthase-related protein 1 OS=Homo sapiens OX=9606 GN=SAMD8 PE=1 SV=2 && PF14360:PAP2 superfamily C-terminal|PF00536:SAM domain (Sterile alpha motif)	1.359	0.0177625	0.221146	up
Cg29548	79.8364	397.819	120.85	30.948	48.8834	111.503	199.502	63.7783	- && sp|P09917|LOX5_HUMAN Polyunsaturated fatty acid 5-lipoxygenase OS=Homo sapiens OX=9606 GN=ALOX5 PE=1 SV=2 && PF01477:PLAT/LH2 domain|PF00305:Lipoxygenase	1.64442	0.0177957	0.221411	up
Cg21870	69.1121	126.706	154.003	11.6055	46.9664	57.3914	116.607	38.6545	- && sp|Q8NCJ5|SPRY3_HUMAN SPRY domain-containing protein 3 OS=Homo sapiens OX=9606 GN=SPRYD3 PE=1 SV=2 && PF00622:SPRY domain	1.591	0.0178583	0.222039	up
Cg08110	0	10.2483	0	10.6384	17.253	69.6896	3.41609	32.527	- && sp|P35441|TSP1_MOUSE Thrombospondin-1 OS=Mus musculus OX=10090 GN=Thbs1 PE=1 SV=1 && PF00090:Thrombospondin type 1 domain|PF07699:Putative ephrin-receptor like|PF02494:HYR domain|PF00008:EGF-like domain|PF13385:Concanavalin A-like lectin/glucanases superfamily	-3.21618	0.0178699	0.222039	down
Cg09220	110.818	249.685	176.462	177.951	899.072	353.367	178.988	476.797	- && sp|Q5ZEQ8|FJX1_XIPMA Four-jointed box protein 1 OS=Xiphophorus maculatus OX=8083 GN=fjx1 PE=2 SV=1 && -	-1.41234	0.0179175	0.222148	down
Cg26435	15.4906	10.2483	12.8336	17.4083	89.1404	41.8137	12.8575	49.4541	- && - && -	-1.94697	0.0179398	0.222148	down
Cg20632	2100.77	603.716	991.396	381.048	819.516	273.019	1231.96	491.194	- && - && -	1.32657	0.0179613	0.222148	up
Cg27734	85.7943	96.8927	112.294	307.546	180.198	162.336	98.327	216.693	- && sp|Q6DGU5|S2546_DANRE Solute carrier family 25 member 46 OS=Danio rerio OX=7955 GN=slc25a46 PE=2 SV=1 && PF00153:Mitochondrial carrier protein	-1.13909	0.0179621	0.222148	down
novel.364	36.9392	0	0	0	0	0	12.3131	0	- && - && -	6.19297	0.0179745	0.222148	up
Cg01635	11.9159	32.6081	23.5283	189.557	10.5435	81.1679	22.6841	93.756	- && - && -	-2.04247	0.0179911	0.222148	down
Cg17045	1.19159	16.7699	1.06947	45.4549	40.2569	26.2361	6.34365	37.316	- && - && PF05225:helix-turn-helix, Psq domain	-2.52858	0.018003	0.222148	down
Cg09206	128.691	163.041	83.4185	277.565	340.267	201.69	125.05	273.174	- && sp|D4A1J4|BDH2_RAT 3-hydroxybutyrate dehydrogenase type 2 OS=Rattus norvegicus OX=10116 GN=Bdh2 PE=3 SV=2 && PF13561:Enoyl-(Acyl carrier protein) reductase	-1.12602	0.0180031	0.222148	down
Cg19393	5234.64	2510.83	3113.22	951.652	1486.63	2513.74	3619.56	1650.68	- && sp|Q3ZBN6|GA45A_BOVIN Growth arrest and DNA damage-inducible protein GADD45 alpha OS=Bos taurus OX=9913 GN=GADD45A PE=2 SV=1 && -	1.13254	0.0180095	0.222148	up
Cg21115	271.682	231.983	232.074	656.679	337.392	491.926	245.247	495.332	- && sp|A2T7G9|HTAI2_PONPY Oxidoreductase HTATIP2 OS=Pongo pygmaeus OX=9600 GN=HTATIP2 PE=3 SV=1 && PF13460:NAD(P)H-binding	-1.01444	0.0180137	0.222148	down
Cg16341	0	0.931661	6.4168	15.474	40.2569	9.83853	2.44949	21.8565	- && sp|Q9DCK3|TSN4_MOUSE Tetraspanin-4 OS=Mus musculus OX=10090 GN=Tspan4 PE=1 SV=1 && PF00335:Tetraspanin family	-3.15213	0.0180321	0.222148	down
Cg27474	1222.57	1484.14	1550.73	725.345	432.283	963.356	1419.14	706.995	- && sp|P41241|CSK_MOUSE Tyrosine-protein kinase CSK OS=Mus musculus OX=10090 GN=Csk PE=1 SV=2 && PF00018:SH3 domain|PF07714:Protein tyrosine and serine/threonine kinase|PF00017:SH2 domain	1.00505	0.0180329	0.222148	up
Cg21812	1914.88	2521.07	1184.97	665.383	974.793	1118.31	1873.64	919.496	- && sp|Q23551|UNC22_CAEEL Twitchin OS=Caenorhabditis elegans OX=6239 GN=unc-22 PE=1 SV=3 && PF00041:Fibronectin type III domain|PF00069:Protein kinase domain|PF07679:Immunoglobulin I-set domain	1.02689	0.0180791	0.222572	up
Cg09050	0	36.3348	0	0	0	0	12.1116	0	- && - && PF13837:Myb/SANT-like DNA-binding domain	6.17689	0.0181181	0.222822	up
Cg17727	47.6635	87.5761	80.2101	159.576	149.526	174.634	71.8165	161.245	- && - && PF14988:Domain of unknown function (DUF4515)	-1.16442	0.0181263	0.222822	down
Cg29087	0	1.86332	0	133.463	0	117.242	0.621107	83.5686	- && - && -	-7.03062	0.0181352	0.222822	down
Cg22188	173.972	241.3	113.364	557.065	302.886	309.094	176.212	389.681	- && sp|Q54VB4|HBX9_DICDI Homeobox protein 9 OS=Dictyostelium discoideum OX=44689 GN=hbx9 PE=3 SV=1 && PF05920:Homeobox KN domain	-1.14391	0.0182418	0.223985	down
Cg24241	20.257	58.6946	28.8756	46.4221	190.741	96.7455	35.9424	111.303	- && - && PF00017:SH2 domain|PF00169:PH domain	-1.62525	0.0183144	0.224122	down
Cg07709	0	2.79498	0	21.2768	8.62649	13.118	0.931661	14.3404	- && - && -	-3.86482	0.0183147	0.224122	down
novel.5858	19.0654	9.31661	35.2924	63.8303	55.5929	80.348	21.2248	66.5904	- && P56277.1 RecName: Full=Cx9C motif-containing protein 4; AltName: Full=Mature T-cell proliferation 1 neighbor protein; AltName: Full=Mature T-cell proliferation-1 type A; Short=MTCP-1 type A; AltName: Full=Protein p8 MTCP-1; Short=p8MTCP1 && PF08991:Mature-T-Cell Proliferation I type	-1.65424	0.0183165	0.224122	down
Cg03825	23.8317	17.7016	29.9451	76.403	151.443	20.4969	23.8261	82.7809	- && sp|Q9H3Y6|SRMS_HUMAN Tyrosine-protein kinase Srms OS=Homo sapiens OX=9606 GN=SRMS PE=1 SV=1 && PF07714:Protein tyrosine and serine/threonine kinase	-1.79692	0.0183386	0.224122	down
Cg20392	71.4952	87.5761	103.738	170.214	229.081	164.795	87.6032	188.03	- && sp|Q5RC46|ADA2_PONAB Adenosine deaminase 2 OS=Pongo abelii OX=9601 GN=ADA2 PE=2 SV=1 && PF08451:Adenosine/AMP deaminase N-terminal|PF00962:Adenosine/AMP deaminase	-1.10088	0.0183507	0.224122	down
Cg15444	1005.7	206.829	524.039	159.576	324.931	195.951	578.856	226.819	- && - && PF07525:SOCS box|PF12796:Ankyrin repeats (3 copies)	1.35117	0.0183566	0.224122	up
Cg26197	83.4111	197.512	109.086	374.278	194.575	328.771	130.003	299.208	- && - && PF00643:B-box zinc finger	-1.20045	0.0183615	0.224122	down
Cg08547	1.19159	2.79498	0	6.76988	40.2569	4.09939	1.32886	17.0421	- && sp|Q91WL8|WWOX_MOUSE WW domain-containing oxidoreductase OS=Mus musculus OX=10090 GN=Wwox PE=1 SV=1 && PF00106:short chain dehydrogenase	-3.65007	0.0183633	0.224122	down
Cg04399	7305.62	2802.43	4557	1873.32	3081.57	1998.04	4888.35	2317.65	- && sp|P70503|NR0B1_RAT Nuclear receptor subfamily 0 group B member 1 OS=Rattus norvegicus OX=10116 GN=Nr0b1 PE=2 SV=1 && PF00104:Ligand-binding domain of nuclear hormone receptor	1.07663	0.0183681	0.224122	up
Cg16280	103.668	64.2846	142.239	27.0795	49.8419	41.8137	103.397	39.5784	- && sp|Q3UMC0|AFG2H_MOUSE ATPase family protein 2 homolog OS=Mus musculus OX=10090 GN=Spata5 PE=1 SV=2 && PF00004:ATPase family associated with various cellular activities (AAA)|PF17862:AAA+ lid domain	1.38389	0.0183783	0.224122	up
Cg28650	651.798	33.5398	218.171	50.2906	144.733	54.1119	301.17	83.0453	- && sp|P34147|RACA_DICDI Rho-related protein racA OS=Dictyostelium discoideum OX=44689 GN=racA PE=1 SV=2 && PF00071:Ras family	1.85823	0.018387	0.224122	up
Cg15574	1459.69	353.099	423.509	324.954	295.218	283.678	745.434	301.283	- && sp|P49797|RGS3_RAT Regulator of G-protein signaling 3 OS=Rattus norvegicus OX=10116 GN=Rgs3 PE=1 SV=2 && PF00615:Regulator of G protein signaling domain	1.30647	0.0183965	0.224122	up
Cg29011	723.294	777.005	352.924	360.738	152.401	311.553	617.741	274.898	- && - && -	1.16802	0.0184178	0.224235	up
Cg29160	11.9159	29.8131	71.6543	5.80276	2.8755	13.9379	37.7944	7.53872	- && - && -	2.31657	0.0184299	0.224237	up
Cg14909	78.6448	14.9066	17.1115	9.67126	3.83399	9.01865	36.8876	7.50797	- && sp|Q923P0|COKA1_MOUSE Collagen alpha-1(XX) chain OS=Mus musculus OX=10090 GN=Col20a1 PE=2 SV=3 && PF00092:von Willebrand factor type A domain	2.28983	0.0184534	0.224264	up
Cg05540	318.154	676.386	553.984	634.435	2004.22	946.958	516.174	1195.2	- && - && -	-1.21084	0.0184561	0.224264	down
novel.106	0	13.0432	13.9031	0	0	0	8.98211	0	- && O93530.1 RecName: Full=Werner syndrome ATP-dependent helicase homolog; AltName: Full=Exonuclease WRN; AltName: Full=Focus-forming activity 1; Short=FFA-1 && PF00270:DEAD/DEAH box helicase	5.74461	0.0184735	1	up
Cg13210	187.079	225.462	214.963	82.2057	78.5969	132	209.168	97.601	- && - && -	1.09848	0.01848	0.224409	up
novel.6330	23.8317	17.7016	28.8756	54.1591	177.322	22.1367	23.4696	84.5393	- && - && -	-1.84911	0.0184921	0.22441	down
Cg27365	59.5794	16.7699	8.55574	2.90138	7.66799	4.09939	28.3017	4.88959	- && sp|Q9Y3Q0|NALD2_HUMAN N-acetylated-alpha-linked acidic dipeptidase 2 OS=Homo sapiens OX=9606 GN=NAALAD2 PE=1 SV=1 && PF04389:Peptidase family M28|PF02225:PA domain|PF04253:Transferrin receptor-like dimerisation domain	2.53089	0.0185229	0.224622	up
Cg19093	10.7243	5.58996	19.2504	37.7179	48.8834	42.6336	11.8549	43.0783	- && sp|P23385|GRM1_RAT Metabotropic glutamate receptor 1 OS=Rattus norvegicus OX=10116 GN=Grm1 PE=1 SV=1 && PF01094:Receptor family ligand binding region	-1.86675	0.0185336	0.224622	down
Cg24036	2.38317	0	0	20.3097	19.17	2.45963	0.794392	13.9798	- && - && PF02017:CIDE-N domain|PF13920:Zinc finger, C3HC4 type (RING finger)	-4.21769	0.0185615	0.224815	down
novel.1904	2.38317	5.58996	6.4168	55.1262	8.62649	19.6771	4.79665	27.8099	- && - && -	-2.52541	0.0185909	0.225026	down
Cg04340	79.8364	137.886	18.1809	30.948	10.5435	22.9566	78.6344	21.4827	- && - && PF13855:Leucine rich repeat	1.87312	0.0186447	0.225453	up
Cg08711	0	0	0	0	0	39.3541	0	13.118	- && - && -	-6.07629	0.0186503	0.225453	down
Cg21037	170.397	50.3097	77.0017	29.9809	46.0079	27.8758	99.2361	34.6216	- && - && PF00583:Acetyltransferase (GNAT) family	1.51778	0.0187149	0.225977	up
Cg17817	165.631	72.6695	140.1	646.04	70.9289	405.019	126.133	373.996	- && - && -	-1.56923	0.0187178	0.225977	down
Cg08981	17.8738	24.2232	36.3619	9.67126	2.8755	2.45963	26.153	5.00213	- && - && -	2.39649	0.0187466	0.22618	up
Cg15990	61.9625	39.1297	49.1955	158.609	139.941	72.9691	50.0959	123.84	- && - && PF16026:Mitochondria-eating protein	-1.30711	0.0187671	0.226281	down
Cg23223	1927.99	424.837	132.614	109.285	320.139	314.833	828.48	248.086	- && sp|Q9UGH3|S23A2_HUMAN Solute carrier family 23 member 2 OS=Homo sapiens OX=9606 GN=SLC23A2 PE=1 SV=1 && PF00860:Permease family	1.73908	0.0188639	0.227073	up
novel.3984	0	4.6583	0	41.5864	4.79249	13.118	1.55277	19.8323	- && - && -	-3.61558	0.0188709	0.227073	down
Cg13925	91.7522	90.3711	69.5154	317.217	131.314	145.118	83.8796	197.883	- && - && -	-1.23775	0.0188827	0.227073	down
Cg08941	34.556	56.8313	18.1809	2.90138	15.336	5.73914	36.5228	7.99217	- && - && PF00386:C1q domain	2.19705	0.0188935	0.227073	up
Cg13670	67.9205	54.0363	28.8756	205.031	87.2234	103.305	50.2775	131.853	- && sp|Q9EP89|LACTB_MOUSE Serine beta-lactamase-like protein LACTB, mitochondrial OS=Mus musculus OX=10090 GN=Lactb PE=1 SV=1 && PF00144:Beta-lactamase	-1.39161	0.0189076	0.227098	down
Cg29663	171.589	315.833	189.296	83.1729	91.0574	132	225.572	102.077	- && sp|Q5R9F4|RND3_PONAB Rho-related GTP-binding protein RhoE OS=Pongo abelii OX=9601 GN=RND3 PE=2 SV=1 && PF00071:Ras family	1.14385	0.0189402	0.227295	up
Cg24347	21.4486	9.31661	12.8336	67.6988	36.423	41.8137	14.5329	48.6452	- && sp|Q5F349|SG196_CHICK Protein O-mannose kinase OS=Gallus gallus OX=9031 GN=POMK PE=2 SV=1 && -	-1.75073	0.0189484	0.227295	down
Cg12652	9.5327	5.58996	4.27787	29.0138	47.9249	13.9379	6.46684	30.2922	- && - && PF00386:C1q domain	-2.23363	0.0189714	0.227371	down
Cg03521	362.243	452.787	456.663	136.365	274.131	211.528	423.897	207.341	- && sp|Q865F7|FABPH_MYOLU Fatty acid-binding protein, heart OS=Myotis lucifugus OX=59463 GN=FABP3 PE=2 SV=3 && PF00061:Lipocalin / cytosolic fatty-acid binding protein family	1.03183	0.0189868	0.227371	up
Cg11261	2.38317	0	2.13893	20.3097	14.3775	10.6584	1.50737	15.1152	- && sp|Q95JD5|ST1B1_CANLF Sulfotransferase family cytosolic 1B member 1 OS=Canis lupus familiaris OX=9615 GN=SULT1B1 PE=1 SV=1 && PF00685:Sulfotransferase domain	-3.36345	0.0189911	0.227371	down
Cg07466	0	1.86332	0	3.86851	23.004	11.4783	0.621107	12.7836	- && - && -	-4.27244	0.0190255	0.227557	down
Cg19205	30.9813	34.4714	37.4314	88.9756	81.4724	82.8076	34.2947	84.4185	- && sp|Q15468|STIL_HUMAN SCL-interrupting locus protein OS=Homo sapiens OX=9606 GN=STIL PE=1 SV=2 && PF15253:SCL-interrupting locus protein N-terminus	-1.29874	0.019031	0.227557	down
Cg09884	0	0	1.06947	15.474	3.83399	9.83853	0.356489	9.71551	- && - && PF00656:Caspase domain	-4.67853	0.019109	1	down
Cg05154	156.098	125.774	116.572	38.6851	29.7135	86.907	132.815	51.7685	- && sp|P28039|AOAH_HUMAN Acyloxyacyl hydrolase OS=Homo sapiens OX=9606 GN=AOAH PE=1 SV=1 && -	1.35519	0.0191712	0.228662	up
Cg21711	42.8971	43.788	7.48627	3.86851	2.8755	10.6584	31.3905	5.8008	- && - && -	2.42442	0.019182	0.228662	up
Cg29544	764.999	4008.94	1579.6	644.106	483.083	1300.33	2117.85	809.172	- && sp|P09917|LOX5_HUMAN Polyunsaturated fatty acid 5-lipoxygenase OS=Homo sapiens OX=9606 GN=ALOX5 PE=1 SV=2 && PF00305:Lipoxygenase|PF01477:PLAT/LH2 domain	1.38806	0.0191919	0.228662	up
novel.1366	0	0	0	0	39.2984	0	0	13.0995	- && - && -	-6.0703	0.0192001	0.228662	down
Cg16689	2390.32	2506.17	2948.52	611.224	1513.47	1641.39	2615	1255.36	- && sp|P23727|P85A_BOVIN Phosphatidylinositol 3-kinase regulatory subunit alpha OS=Bos taurus OX=9913 GN=PIK3R1 PE=1 SV=1 && PF00620:RhoGAP domain|PF00536:SAM domain (Sterile alpha motif)|PF16454:Phosphatidylinositol 3-kinase regulatory subunit P85 inter-SH2 domain|PF00130:Phorbol esters/diacylglycerol binding domain (C1 domain)|PF00017:SH2 domain	1.05859	0.0192027	0.228662	up
Cg08192	10.7243	14.9066	13.9031	67.6988	20.1285	53.292	13.178	47.0398	- && - && PF04852:Protein of unknown function (DUF640)|PF00078:Reverse transcriptase (RNA-dependent DNA polymerase)	-1.83298	0.0192049	0.228662	down
Cg27896	30.9813	86.6444	64.168	172.148	142.816	128.721	60.5979	147.895	- && - && -	-1.2827	0.0192089	0.228662	down
Cg05903	53.6214	53.1047	88.7658	168.28	228.123	86.0871	65.164	160.83	- && sp|Q5PPV3|MORN3_XENLA MORN repeat-containing protein 3 OS=Xenopus laevis OX=8355 GN=morn3 PE=2 SV=1 && PF02493:MORN repeat	-1.30264	0.0192485	0.228988	down
novel.6329	150.14	7.45328	170.045	24.1782	41.2154	3.27951	109.213	22.891	- && - && -	2.25679	0.0193022	0.229482	up
Cg03980	23.8317	36.3348	28.8756	119.924	55.5929	68.0498	29.6807	81.1888	- && sp|Q9H3J6|MTRFR_HUMAN Mitochondrial translation release factor in rescue OS=Homo sapiens OX=9606 GN=MTRFR PE=1 SV=1 && PF00472:RF-1 domain	-1.44808	0.0193445	0.229733	down
Cg04451	252.617	356.826	330.465	914.901	420.781	594.411	313.303	643.364	- && sp|A5GFW1|AURKA_PIG Aurora kinase A OS=Sus scrofa OX=9823 GN=AURKA PE=3 SV=1 && PF13445:RING-type zinc-finger|PF00069:Protein kinase domain	-1.03755	0.0193505	0.229733	down
Cg05862	45.2803	21.4282	29.9451	2.90138	4.79249	13.118	32.2179	6.9373	- && sp|Q6IDD9|SARM1_DROME NAD(+) hydrolase sarm1 OS=Drosophila melanogaster OX=7227 GN=Sarm PE=1 SV=1 && -	2.20006	0.0193602	0.229733	up
Cg28460	47.6635	34.4714	19.2504	79.3044	116.937	74.6088	33.7951	90.2833	- && sp|S4R2P9|NAC3_MOUSE Sodium/calcium exchanger 3 OS=Mus musculus OX=10090 GN=Slc8a3 PE=1 SV=1 && PF03160:Calx-beta domain|PF01699:Sodium/calcium exchanger protein	-1.41957	0.0194386	0.230511	down
novel.6327	400.373	36.3348	1110.11	240.814	116.937	37.7144	515.605	131.822	- && - && -	1.96824	0.0194503	0.230511	up
novel.2371	21.4486	4.6583	26.7367	0	0	4.09939	17.6145	1.36646	- && - && -	3.63815	0.019484	0.230764	up
Cg09385	442.079	218.94	652.375	95.7455	249.21	202.51	437.798	182.488	- && sp|Q3SYU2|EF2_BOVIN Elongation factor 2 OS=Bos taurus OX=9913 GN=EEF2 PE=2 SV=3 && PF03144:Elongation factor Tu domain 2|PF00009:Elongation factor Tu GTP binding domain|PF14492:Elongation Factor G, domain III|PF00679:Elongation factor G C-terminus|PF03764:Elongation factor G, domain IV	1.26185	0.0195072	0.230893	up
Cg14033	44.0887	91.3027	121.919	359.771	111.186	196.771	85.7702	222.576	- && sp|Q1T769|MIS12_CHICK Protein MIS12 homolog OS=Gallus gallus OX=9031 GN=MIS12 PE=2 SV=1 && PF05859:Mis12 protein	-1.37406	0.0195441	0.230921	down
Cg12266	543.364	324.218	636.333	227.275	313.429	181.193	501.305	240.632	- && sp|Q9WUN2|TBK1_MOUSE Serine/threonine-protein kinase TBK1 OS=Mus musculus OX=10090 GN=Tbk1 PE=1 SV=1 && PF18396:TANK binding kinase 1 ubiquitin-like domain|PF00069:Protein kinase domain|PF18394:TANK-binding kinase 1 coiled-coil domain 1	1.05893	0.0195523	0.230921	up
Cg08316	23.8317	0	7.48627	77.3701	55.5929	29.5156	10.4393	54.1595	- && - && -	-2.39161	0.0195576	0.230921	down
novel.2965	16.6822	1.86332	49.1955	117.022	54.6344	100.025	22.5803	90.5606	- && - && -	-2.00767	0.0195589	0.230921	down
Cg01599	0	0.931661	0	39.6522	0	1.63975	0.310554	13.764	- && - && -	-5.17927	0.0195826	0.231055	down
Cg24376	142.99	148.134	40.6398	39.6522	20.1285	52.4721	110.588	37.4176	- && sp|Q3SYV5|TSN33_BOVIN Tetraspanin-33 OS=Bos taurus OX=9913 GN=TSPAN33 PE=1 SV=1 && PF00335:Tetraspanin family	1.5614	0.0196074	0.231175	up
novel.1615	41.7056	11.1799	2.13893	0	3.83399	0	18.3415	1.278	- && - && -	3.86192	0.0196175	0.231175	up
Cg14532	20.257	40.9931	17.1115	68.666	64.2194	89.3666	26.1205	74.084	- && sp|P98164|LRP2_HUMAN Low-density lipoprotein receptor-related protein 2 OS=Homo sapiens OX=9606 GN=LRP2 PE=1 SV=3 && PF14670:Coagulation Factor Xa inhibitory site	-1.49838	0.0196337	0.23122	down
Cg14298	2026.89	819.861	3473.63	853.973	465.83	1259.33	2106.79	859.711	- && sp|P16109|LYAM3_HUMAN P-selectin OS=Homo sapiens OX=9606 GN=SELP PE=1 SV=3 && PF00084:Sushi repeat (SCR repeat)|PF02494:HYR domain|PF00008:EGF-like domain|PF07699:Putative ephrin-receptor like|PF00090:Thrombospondin type 1 domain	1.29288	0.0196534	0.231303	up
Cg20411	52.4298	12.1116	58.8207	143.135	161.028	64.7703	41.1207	122.978	- && sp|Q04757|HR29_HALRO Body wall muscle protein HR-29 OS=Halocynthia roretzi OX=7729 PE=1 SV=2 && PF00011:Hsp20/alpha crystallin family	-1.58416	0.0196654	0.231303	down
Cg29338	14.299	40.9931	0	10.6384	219.496	90.1865	18.4307	106.774	- && sp|P02637|SCP_MIZYE Sarcoplasmic calcium-binding protein OS=Mizuhopecten yessoensis OX=6573 PE=1 SV=1 && -	-2.52843	0.0197286	0.231531	down
Cg06517	53.6214	89.4394	80.2101	244.683	150.484	121.342	74.4236	172.17	- && sp|O15995|CCNE_HEMPU G1/S-specific cyclin-E OS=Hemicentrotus pulcherrimus OX=7650 GN=CYCE PE=2 SV=1 && PF02984:Cyclin, C-terminal domain|PF00134:Cyclin, N-terminal domain	-1.20732	0.019733	0.231531	down
Cg08861	505.233	562.723	211.755	1052.23	726.542	942.039	426.57	906.938	- && sp|P52292|IMA1_HUMAN Importin subunit alpha-1 OS=Homo sapiens OX=9606 GN=KPNA2 PE=1 SV=1 && PF01749:Importin beta binding domain|PF00514:Armadillo/beta-catenin-like repeat|PF16186:Atypical Arm repeat	-1.08808	0.0197334	0.231531	down
Cg18953	70.3037	77.3278	82.349	182.787	188.824	124.621	76.6602	165.411	- && sp|Q3TYL0|IQAK1_MOUSE IQ motif and ankyrin repeat domain-containing protein 1 OS=Mus musculus OX=10090 GN=Iqank1 PE=1 SV=3 && PF12781:ATP-binding dynein motor region|PF12796:Ankyrin repeats (3 copies)	-1.10844	0.0197474	0.231531	down
Cg14835	53.6214	40.0614	32.084	73.5016	172.53	81.9877	41.9223	109.34	- && sp|Q8NEY3|SPAT4_HUMAN Spermatogenesis-associated protein 4 OS=Homo sapiens OX=9606 GN=SPATA4 PE=1 SV=1 && PF06294:CH-like domain in sperm protein	-1.3842	0.0197612	0.231531	down
Cg26159	1216.61	134.159	2072.63	285.302	616.315	101.665	1141.13	334.427	- && - && -	1.7709	0.0197737	0.231531	up
Cg17339	121.542	82.9178	72.7238	22.2439	39.2984	45.0933	92.3945	35.5452	- && sp|Q6GM65|PLAP_XENLA Phospholipase A-2-activating protein OS=Xenopus laevis OX=8355 GN=plaa PE=2 SV=2 && PF00400:WD domain, G-beta repeat|PF08324:PUL domain|PF09070:PFU (PLAA family ubiquitin binding)	1.3749	0.0197855	0.231531	up
Cg06182	27.4065	25.1548	17.1115	7.73701	1.917	0	23.2243	3.218	- && sp|P55043|RAD_RAT GTP-binding protein RAD OS=Rattus norvegicus OX=10116 GN=Rrad PE=2 SV=2 && PF00071:Ras family	2.87028	0.0197946	0.231531	up
Cg24327	94.1354	81.0545	159.351	424.568	138.982	244.323	111.514	269.291	- && - && PF00656:Caspase domain	-1.27217	0.0198304	0.231703	down
novel.4744	102.477	69.8745	119.78	268.861	217.579	152.497	97.3771	212.979	- && - && -	-1.12979	0.0198355	0.231703	down
Cg18339	12641.5	1110.54	12333.1	4177.02	1376.4	3117.99	8695.06	2890.47	- && sp|G9JJU2|GPX_PROCL Glutathione peroxidase OS=Procambarus clarkii OX=6728 GN=GPx PE=2 SV=1 && PF00255:Glutathione peroxidase	1.58886	0.0199238	0.232589	up
Cg20387	40.514	59.6263	26.7367	44.4878	358.479	48.3728	42.2923	150.446	- && sp|Q19673|TYR3_CAEEL Putative tyrosinase-like protein tyr-3 OS=Caenorhabditis elegans OX=6239 GN=tyr-3 PE=3 SV=5 && PF00264:Common central domain of tyrosinase	-1.82859	0.0199667	0.232944	down
Cg00550	3.57476	0	0	11.6055	37.3814	2.45963	1.19159	17.1489	- && - && -	-3.9108	0.0200231	0.233457	down
Cg26069	1184.44	308.38	488.747	143.135	408.32	231.205	660.521	260.887	- && sp|O76031|CLPX_HUMAN ATP-dependent Clp protease ATP-binding subunit clpX-like, mitochondrial OS=Homo sapiens OX=9606 GN=CLPX PE=1 SV=2 && PF12796:Ankyrin repeats (3 copies)|PF07525:SOCS box	1.33975	0.0200433	0.233548	up
Cg24520	0	0.931661	2.13893	7.73701	19.17	12.2982	1.02353	13.0684	- && - && -	-3.65349	0.0200648	0.23355	down
Cg09574	59.5794	56.8313	57.7512	312.382	47.9249	138.559	58.054	166.289	- && - && -	-1.51809	0.0200809	0.23355	down
Cg20121	129.883	137.886	41.7092	281.434	342.184	151.677	103.159	258.432	- && sp|B7Z0W9|OTOP_DROME Proton channel OtopLc OS=Drosophila melanogaster OX=7227 GN=OtopLc PE=3 SV=2 && PF03189:Otopetrin	-1.32414	0.0200971	0.23355	down
Cg03815	51.2383	50.3097	31.0146	144.102	83.3894	97.5654	44.1875	108.352	- && - && -	-1.29367	0.0201241	0.23355	down
Cg23458	21.4486	14.9066	9.62521	55.1262	36.423	55.7517	15.3268	49.1003	- && sp|P17666|CP2CE_RABIT Cytochrome P450 2C14 OS=Oryctolagus cuniculus OX=9986 GN=CYP2C14 PE=2 SV=1 && PF00067:Cytochrome P450	-1.68419	0.0201279	0.23355	down
Cg22654	89.369	75.4645	54.5428	261.124	135.148	119.702	73.1255	171.992	- && sp|Q8BGA5|KRR1_MOUSE KRR1 small subunit processome component homolog OS=Mus musculus OX=10090 GN=Krr1 PE=2 SV=1 && PF17903:Krr1 KH1 domain	-1.23395	0.0201308	0.23355	down
Cg16550	0	0	0	7.73701	9.58499	4.91926	0	7.41375	- && sp|Q6AX44|FBCDA_XENLA Fibrinogen C domain-containing protein 1-A OS=Xenopus laevis OX=8355 GN=fibcd1-a PE=2 SV=1 && PF00147:Fibrinogen beta and gamma chains, C-terminal globular domain	-5.2492	0.0201411	1	down
Cg11238	203.761	290.678	385.008	81.2386	146.65	171.354	293.149	133.081	- && sp|P29375|KDM5A_HUMAN Lysine-specific demethylase 5A OS=Homo sapiens OX=9606 GN=KDM5A PE=1 SV=3 && PF00628:PHD-finger|PF02928:C5HC2 zinc finger|PF02373:JmjC domain, hydroxylase|PF08429:PLU-1-like protein|PF01388:ARID/BRIGHT DNA binding domain|PF02375:jmjN domain	1.13878	0.020207	0.234143	up
Cg23873	2.38317	59.6263	17.1115	12.5726	290.425	91.8263	26.3736	131.608	- && - && PF00337:Galactoside-binding lectin	-2.31184	0.0202923	0.234491	down
Cg24131	554.088	458.377	847.018	380.081	230.998	309.094	619.828	306.724	- && sp|Q7RTX9|MOT14_HUMAN Monocarboxylate transporter 14 OS=Homo sapiens OX=9606 GN=SLC16A14 PE=2 SV=1 && PF07690:Major Facilitator Superfamily	1.01481	0.0202924	0.234491	up
Cg25277	420.63	418.316	480.191	176.984	104.476	317.293	439.712	199.584	- && sp|P53988|MOT2_MESAU Monocarboxylate transporter 2 OS=Mesocricetus auratus OX=10036 GN=SLC16A7 PE=1 SV=1 && PF07690:Major Facilitator Superfamily	1.13841	0.0202996	0.234491	up
Cg20081	4.76635	259.002	296.242	40.6193	6.70949	69.6896	186.67	39.0061	- && - && -	2.25743	0.0203155	0.234531	up
Cg21480	26.2149	46.583	49.1955	86.0742	148.567	77.8883	40.6645	104.177	- && - && -	-1.35361	0.0204014	0.2353	down
Cg19101	89.369	211.487	91.9742	478.728	202.243	259.901	130.943	313.624	- && sp|Q7ZWE3|LARP7_DANRE La-related protein 7 OS=Danio rerio OX=7955 GN=larp7 PE=2 SV=1 && PF08777:RNA binding motif|PF05383:La domain|PF00076:RNA recognition motif. (a.k.a. RRM, RBD, or RNP domain)	-1.25777	0.0204169	0.2353	down
Cg08466	183.504	214.282	164.698	37.7179	100.642	100.845	187.495	79.7351	- && sp|Q5EAJ7|MVP_STRPU Major vault protein OS=Strongylocentrotus purpuratus OX=7668 GN=MVP PE=1 SV=1 && PF17794:Major Vault Protein repeat domain|PF17795:Major Vault Protein Repeat domain|PF17796:Major Vault Protein repeat domain|PF01505:Major Vault Protein repeat domain|PF01541:GIY-YIG catalytic domain	1.23264	0.0204265	0.2353	up
Cg30262	39.3224	16.7699	71.6543	329.79	11.502	170.534	42.5822	170.609	- && sp|B7IHX7|Y1246_THEAB Probable transcriptional regulatory protein THA_1246 OS=Thermosipho africanus (strain TCF52B) OX=484019 GN=THA_1246 PE=3 SV=1 && PF03184:DDE superfamily endonuclease|PF01709:Transcriptional regulator	-2.00387	0.0204324	0.2353	down
Cg03647	177.547	86.6444	130.475	310.448	268.38	248.423	131.555	275.75	- && sp|A8WGS4|TLCD2_DANRE TLC domain-containing protein 2 OS=Danio rerio OX=7955 GN=tlcd2 PE=2 SV=1 && PF03798:TLC domain	-1.06963	0.0204533	0.235352	down
Cg01502	20.257	3.72664	18.1809	0	1.917	1.63975	14.0549	1.18558	- && sp|Q9QXM0|ABHD2_MOUSE Monoacylglycerol lipase ABHD2 OS=Mus musculus OX=10090 GN=Abhd2 PE=1 SV=1 && PF00561:alpha/beta hydrolase fold	3.55113	0.0204622	0.235352	up
Cg29625	372.967	87.5761	904.769	29.9809	269.338	87.7269	455.104	129.015	- && - && -	1.81875	0.0204891	0.235517	up
novel.3295	48.8551	19.5649	18.1809	88.9756	120.771	46.733	28.867	85.4932	- && - && -	-1.57151	0.0205412	0.235972	down
Cg25035	57.1962	499.37	410.675	1436.18	555.929	757.567	322.414	916.559	- && sp|P49888|ST1E1_HUMAN Sulfotransferase 1E1 OS=Homo sapiens OX=9606 GN=SULT1E1 PE=1 SV=1 && PF00685:Sulfotransferase domain	-1.50641	0.0206177	0.236515	down
Cg19199	34.556	131.364	11.7641	468.089	50.8004	162.336	59.2281	227.075	- && sp|P0C6A0|ZGLP1_HUMAN GATA-type zinc finger protein 1 OS=Homo sapiens OX=9606 GN=ZGLP1 PE=2 SV=1 && PF00320:GATA zinc finger	-1.93514	0.0206235	0.236515	down
Cg27490	131.075	151.861	250.255	934.244	139.941	368.945	177.73	481.043	- && sp|A6QQ14|DPOE4_BOVIN DNA polymerase epsilon subunit 4 OS=Bos taurus OX=9913 GN=POLE4 PE=3 SV=1 && PF00808:Histone-like transcription factor (CBF/NF-Y) and archaeal histone	-1.43622	0.0206264	0.236515	down
Cg14340	347.943	240.368	392.495	199.228	122.688	157.416	326.935	159.777	- && sp|Q8K0U4|HS12A_MOUSE Heat shock 70 kDa protein 12A OS=Mus musculus OX=10090 GN=Hspa12a PE=1 SV=1 && -	1.03257	0.0207659	0.237894	up
Cg16371	79.8364	90.3711	48.126	199.228	148.567	141.019	72.7778	162.938	- && sp|Q6L8Q7|PDE12_HUMAN 2',5'-phosphodiesterase 12 OS=Homo sapiens OX=9606 GN=PDE12 PE=1 SV=2 && PF03372:Endonuclease/Exonuclease/phosphatase family	-1.16164	0.020772	0.237894	down
Cg04932	305.046	591.604	191.435	186.655	161.986	131.18	362.695	159.941	- && sp|P70403|CASP_MOUSE Protein CASP OS=Mus musculus OX=10090 GN=Cux1 PE=1 SV=2 && PF08172:CASP C terminal	1.18239	0.0207899	0.237953	up
Cg28416	3.57476	1.86332	0	5.80276	60.3854	0.819877	1.81269	22.336	- && sp|P04464|CALM_WHEAT Calmodulin OS=Triticum aestivum OX=4565 PE=1 SV=3 && PF13499:EF-hand domain pair	-3.63578	0.020826	0.23822	down
Cg25821	0	7.45328	3.2084	36.7508	7.66799	31.9752	3.5539	25.4647	- && sp|P53988|MOT2_MESAU Monocarboxylate transporter 2 OS=Mesocricetus auratus OX=10036 GN=SLC16A7 PE=1 SV=1 && PF07690:Major Facilitator Superfamily	-2.8116	0.020863	0.238499	down
novel.2467	7.14952	0	0	42.5536	5.75099	22.9566	2.38317	23.7537	- && - && -	-3.36305	0.0209258	0.23907	down
Cg22967	168.014	138.817	194.643	32.8823	88.1819	88.5468	167.158	69.8703	- && sp|P56192|SYMC_HUMAN Methionine--tRNA ligase, cytoplasmic OS=Homo sapiens OX=9606 GN=MARS1 PE=1 SV=2 && PF18485:Glutathione S-transferase, N-terminal domain|PF09334:tRNA synthetases class I (M)|PF00458:WHEP-TRS domain	1.25681	0.0210039	0.239449	up
Cg19501	384.883	490.053	420.301	89.9427	134.19	329.591	431.746	184.574	- && sp|Q99LI8|HGS_MOUSE Hepatocyte growth factor-regulated tyrosine kinase substrate OS=Mus musculus OX=10090 GN=Hgs PE=1 SV=2 && PF01363:FYVE zinc finger|PF00790:VHS domain|PF12210:Hepatocyte growth factor-regulated tyrosine kinase substrate	1.22471	0.0210107	0.239449	up
Cg18028	1174.91	3280.38	419.231	8630.64	1722.42	4069.87	1624.84	4807.64	- && sp|P06180|HIBN_XENLA Histone-binding protein N1/N2 OS=Xenopus laevis OX=8355 PE=1 SV=3 && PF10516:SHNi-TPR	-1.56487	0.0210158	0.239449	down
Cg28032	232.36	241.3	221.38	123.792	93.9329	129.541	231.68	115.755	- && - && PF00047:Immunoglobulin domain|PF13927:Immunoglobulin domain	1.00065	0.02102	0.239449	up
Cg30602	23.8317	5.58996	11.7641	82.2057	35.4645	33.615	13.7286	50.4284	- && sp|Q8K203|NEIL3_MOUSE Endonuclease 8-like 3 OS=Mus musculus OX=10090 GN=Neil3 PE=1 SV=1 && PF06831:Formamidopyrimidine-DNA glycosylase H2TH domain|PF06839:GRF zinc finger|PF00641:Zn-finger in Ran binding protein and others	-1.88782	0.0210244	0.239449	down
novel.6378	60.771	4.6583	8.55574	147.97	38.3399	113.963	24.6617	100.091	- && - && -	-2.03103	0.0210375	0.239449	down
Cg13444	234.743	264.592	220.31	862.677	299.052	410.759	239.882	524.162	- && sp|B5FYQ0|ARL3_TAEGU ADP-ribosylation factor-like protein 3 OS=Taeniopygia guttata OX=59729 GN=ARL3 PE=2 SV=1 && PF00025:ADP-ribosylation factor family	-1.12731	0.0210485	0.239449	down
Cg15885	1.19159	2.79498	0	23.211	7.66799	13.118	1.32886	14.6657	- && sp|P09480|ACHA2_CHICK Neuronal acetylcholine receptor subunit alpha-2 OS=Gallus gallus OX=9031 GN=CHRNA2 PE=2 SV=1 && PF02932:Neurotransmitter-gated ion-channel transmembrane region|PF02931:Neurotransmitter-gated ion-channel ligand binding domain	-3.433	0.0211361	0.240214	down
Cg19422	40.514	17.7016	36.3619	109.285	57.5099	88.5468	31.5258	85.114	- && sp|Q8HY87|RNZ2_MACFA Zinc phosphodiesterase ELAC protein 2 OS=Macaca fascicularis OX=9541 GN=ELAC2 PE=2 SV=1 && PF12706:Beta-lactamase superfamily domain	-1.43795	0.0211414	0.240214	down
novel.838	108.434	0.931661	5.34734	4.83563	0.958499	7.3789	38.2378	4.39101	- && - && -	3.11137	0.0211784	0.240488	up
Cg22054	48.8551	56.8313	45.9871	115.088	114.061	110.683	50.5578	113.278	- && - && -	-1.16271	0.0212057	0.240602	down
novel.6338	0	1.86332	0	17.4083	0	29.5156	0.621107	15.6413	- && - && -	-4.57642	0.0212206	0.240602	down
Cg13211	1054.55	693.155	1391.38	366.541	689.161	487.827	1046.36	514.509	- && sp|Q03412|UNC7_CAEEL Innexin unc-7 OS=Caenorhabditis elegans OX=6239 GN=unc-7 PE=1 SV=1 && PF00481:Protein phosphatase 2C|PF00876:Innexin	1.02399	0.021227	0.240602	up
Cg04436	184.696	127.637	217.102	77.3701	68.0534	98.3853	176.478	81.2696	- && - && -	1.11696	0.0212482	0.240698	up
novel.6589	42.8971	38.1981	48.126	164.411	133.231	46.733	43.0738	114.792	- && - && -	-1.41338	0.021308	0.241083	down
Cg21754	7.14952	10.2483	44.9176	4.83563	2.8755	0.819877	20.7718	2.84367	- && sp|Q9VQH2|DUOX_DROME Dual oxidase OS=Drosophila melanogaster OX=7227 GN=Duox PE=1 SV=2 && PF08030:Ferric reductase NAD binding domain|PF03098:Animal haem peroxidase|PF01794:Ferric reductase like transmembrane component|PF08022:FAD-binding domain	2.88336	0.0213395	0.241294	up
Cg12380	163.247	136.954	79.1406	57.0605	62.3024	40.174	126.447	53.179	- && sp|C6KFA3|AGRG6_DANRE Adhesion G-protein coupled receptor G6 OS=Danio rerio OX=7955 GN=adgrg6 PE=1 SV=1 && PF00008:EGF-like domain|PF00002:7 transmembrane receptor (Secretin family)|PF00028:Cadherin domain	1.25062	0.0213536	0.241307	up
Cg11287	50.0467	45.6514	68.4459	117.022	171.571	94.2859	54.7146	127.626	- && - && -	-1.22179	0.0213752	0.241406	down
Cg28375	4.76635	2.79498	39.5703	2.90138	0	0	15.7105	0.967126	- && - && -	4.05158	0.0214221	0.24179	up
Cg17711	182704	221697	155750	142347	51968.8	79272.3	186717	91196.2	- && - && -	1.03381	0.0214372	0.241815	up
Cg26611	9.5327	37.2664	39.5703	77.3701	116.937	63.1306	28.7898	85.8125	- && sp|Q6AYP4|ZC21C_RAT Zinc finger C2HC domain-containing protein 1C OS=Rattus norvegicus OX=10116 GN=Zc2hc1c PE=2 SV=1 && PF13913:zinc-finger of a C2HC-type	-1.56922	0.021515	0.2424	down
Cg27770	396.799	396.887	370.036	123.792	273.172	169.715	387.907	188.893	- && sp|P27987|IP3KB_HUMAN Inositol-trisphosphate 3-kinase B OS=Homo sapiens OX=9606 GN=ITPKB PE=1 SV=5 && PF03770:Inositol polyphosphate kinase	1.03834	0.0215561	0.242717	up
Cg29297	8.34111	3.72664	86.6269	7.73701	0	4.09939	32.8982	3.94547	- && - && -	3.05958	0.0216044	0.243096	up
Cg18675	82.2195	265.523	209.616	77.3701	50.8004	96.7455	185.786	74.972	- && sp|Q9CX84|RGS19_MOUSE Regulator of G-protein signaling 19 OS=Mus musculus OX=10090 GN=Rgs19 PE=1 SV=1 && PF00615:Regulator of G protein signaling domain	1.30956	0.0216157	0.243096	up
novel.5019	32.1729	5.58996	0	336.56	32.589	163.156	12.5876	177.435	- && - && -	-3.8222	0.0216733	0.243596	down
Cg09660	297.897	287.883	392.495	112.187	128.439	226.286	326.091	155.637	- && sp|Q9WVE9|ITSN1_RAT Intersectin-1 OS=Rattus norvegicus OX=10116 GN=Itsn1 PE=1 SV=2 && PF00018:SH3 domain|PF00168:C2 domain|PF14604:Variant SH3 domain|PF07653:Variant SH3 domain|PF00621:RhoGEF domain|PF16652:Pleckstrin homology domain|PF12763:Cytoskeletal-regulatory complex EF hand	1.06575	0.0217361	0.244156	up
Cg19459	322.92	62.4213	194.643	94.7784	58.4684	63.9504	193.328	72.3991	- && - && -	1.41585	0.0217754	0.244451	up
Cg05759	215.677	17.7016	14.9725	19.3425	23.9625	12.2982	82.7838	18.5344	- && sp|Q61391|NEP_MOUSE Neprilysin OS=Mus musculus OX=10090 GN=Mme PE=1 SV=3 && PF05649:Peptidase family M13|PF01431:Peptidase family M13	2.15815	0.0217922	0.244459	up
Cg26368	16.6822	87.5761	127.267	2.90138	11.502	38.5342	77.175	17.6459	- && sp|Q9P2K2|TXD16_HUMAN Thioredoxin domain-containing protein 16 OS=Homo sapiens OX=9606 GN=TXNDC16 PE=1 SV=4 && PF13848:Thioredoxin-like domain|PF00085:Thioredoxin	2.12267	0.0218022	0.244459	up
Cg10578	66.7289	61.4896	65.2375	0	23.9625	19.6771	64.4853	14.5465	- && - && -	2.14525	0.0218222	0.244537	up
Cg22407	81.0279	83.8495	55.6123	195.36	135.148	148.398	73.4966	159.635	- && sp|Q6AYJ1|RECQ1_RAT ATP-dependent DNA helicase Q1 OS=Rattus norvegicus OX=10116 GN=Recql PE=1 SV=1 && PF00270:DEAD/DEAH box helicase|PF16124:RecQ zinc-binding|PF00271:Helicase conserved C-terminal domain	-1.11855	0.0218725	0.244954	down
novel.6913	0	0	9.62521	26.1124	39.2984	15.5777	3.2084	26.9962	- && - && -	-3.0743	0.0219363	0.245504	down
Cg15464	33.3644	51.2413	84.4879	7.73701	5.75099	31.1553	56.3646	14.8811	- && - && PF12796:Ankyrin repeats (3 copies)	1.91238	0.0219793	0.245709	up
Cg15086	36.9392	14.9066	35.2924	1.93425	3.83399	11.4783	29.0461	5.74884	- && sp|Q9UHI7|S23A1_HUMAN Solute carrier family 23 member 1 OS=Homo sapiens OX=9606 GN=SLC23A1 PE=1 SV=3 && PF00860:Permease family	2.31957	0.0219942	0.245729	up
Cg19605	3.57476	13.0432	7.48627	27.0795	64.2194	16.3975	8.03476	35.8988	- && - && -	-2.14463	0.0220076	0.245732	down
novel.3922	0	0	0	13.5398	0.958499	9.01865	0	7.83897	- && - && -	-5.33107	0.0220124	1	down
Cg12937	13.1075	30.7448	73.7932	7.73701	1.917	14.7578	39.2152	8.13727	- && sp|Q53G44|IF44L_HUMAN Interferon-induced protein 44-like OS=Homo sapiens OX=9606 GN=IFI44L PE=2 SV=3 && PF07534:TLD|PF01926:50S ribosome-binding GTPase	2.26077	0.0220586	0.246151	up
Cg18922	8.34111	5.58996	2.13893	13.5398	40.2569	26.2361	5.35667	26.6776	- && sp|Q8N0N9|ODH_HALDH Opine dehydrogenase OS=Haliotis discus hannai OX=42344 GN=tadh PE=2 SV=1 && PF02317:NAD/NADP octopine/nopaline dehydrogenase, alpha-helical domain	-2.32283	0.0220764	0.246151	down
Cg26064	15.4906	13.0432	9.62521	58.0276	16.2945	63.9504	12.7197	46.0908	- && - && PF05837:Centromere protein H (CENP-H)	-1.8603	0.0220846	0.246151	down
novel.2024	0	4.6583	0	30.948	21.087	4.09939	1.55277	18.7115	- && - && -	-3.5307	0.0221159	0.246348	down
Cg11828	712.569	47.5147	113.364	146.036	60.3854	22.1367	291.149	76.1861	- && - && PF00059:Lectin C-type domain	1.93451	0.0221285	0.246348	up
Cg18816	395.607	227.325	430.995	158.609	187.866	175.454	351.309	173.976	- && sp|Q92968|PEX13_HUMAN Peroxisomal membrane protein PEX13 OS=Homo sapiens OX=9606 GN=PEX13 PE=1 SV=2 && PF07653:Variant SH3 domain|PF04088:Peroxin 13, N-terminal region	1.01319	0.0221627	0.246582	up
novel.229	3.57476	15.8382	2.13893	0	0	0	7.18398	0	- && - && -	5.42426	0.0222063	1	up
Cg01320	324.112	303.721	411.745	1003.88	468.706	614.908	346.526	695.83	- && sp|P84022|SMAD3_HUMAN Mothers against decapentaplegic homolog 3 OS=Homo sapiens OX=9606 GN=SMAD3 PE=1 SV=1 && PF03166:MH2 domain|PF03165:MH1 domain	-1.00576	0.0222444	0.247289	down
Cg20618	15.4906	0	0	64.7975	14.3775	39.3541	5.16355	39.5097	- && - && PF00270:DEAD/DEAH box helicase	-2.96361	0.0222527	0.247289	down
Cg18204	2.38317	12.1116	6.4168	0	0	0	6.97052	0	- && sp|Q8NE00|TM104_HUMAN Transmembrane protein 104 OS=Homo sapiens OX=9606 GN=TMEM104 PE=1 SV=2 && PF01490:Transmembrane amino acid transporter protein	5.37997	0.0222768	1	up
Cg03921	213.294	113.663	105.877	338.494	343.143	236.125	144.278	305.92	- && sp|Q9D787|PPIL2_MOUSE RING-type E3 ubiquitin-protein ligase PPIL2 OS=Mus musculus OX=10090 GN=Ppil2 PE=1 SV=2 && PF00160:Cyclophilin type peptidyl-prolyl cis-trans isomerase/CLD|PF04641:Rtf2 RING-finger	-1.08576	0.0223	0.247513	down
novel.5317	7.14952	0.931661	13.9031	0	0	0	7.32809	0	- && - && -	5.44561	0.0223004	1	up
Cg04510	27.4065	21.4282	8.55574	48.3563	88.1819	44.2734	19.1301	60.2705	- && sp|Q76EQ0|SRR_RAT Serine racemase OS=Rattus norvegicus OX=10116 GN=Srr PE=1 SV=1 && PF00291:Pyridoxal-phosphate dependent enzyme	-1.65704	0.0223117	0.247513	down
Cg09655	117.967	23.2915	118.711	25.1453	30.672	28.6957	86.6565	28.171	- && - && PF03351:DOMON domain|PF02014:Reeler domain|PF03188:Eukaryotic cytochrome b561	1.61864	0.0223125	0.247513	up
Cg20281	720.91	319.56	532.595	281.434	241.542	255.802	524.355	259.592	- && sp|Q13895|BYST_HUMAN Bystin OS=Homo sapiens OX=9606 GN=BYSL PE=1 SV=3 && PF00106:short chain dehydrogenase|PF05291:Bystin	1.01368	0.0223586	0.247878	up
Cg00259	40.514	19.5649	53.4734	102.515	94.8914	91.8263	37.8507	96.411	- && sp|P06797|CATL1_MOUSE Procathepsin L OS=Mus musculus OX=10090 GN=Ctsl PE=1 SV=2 && PF08246:Cathepsin propeptide inhibitor domain (I29)|PF00112:Papain family cysteine protease	-1.35242	0.0224237	0.248452	down
Cg01139	377.733	555.27	740.071	247.584	210.87	363.206	557.691	273.887	- && sp|P70182|PI51A_MOUSE Phosphatidylinositol 4-phosphate 5-kinase type-1 alpha OS=Mus musculus OX=10090 GN=Pip5k1a PE=1 SV=2 && PF01504:Phosphatidylinositol-4-phosphate 5-Kinase	1.02556	0.0224654	0.248767	up
Cg01202	1.19159	0	7.48627	40.6193	9.58499	18.8572	2.89262	23.0205	- && sp|Q04786|HEX_VIBVL Beta-hexosaminidase OS=Vibrio vulnificus OX=672 GN=hex PE=3 SV=1 && PF00728:Glycosyl hydrolase family 20, catalytic domain|PF02838:Glycosyl hydrolase family 20, domain 2|PF03173:Putative carbohydrate binding domain|PF03174:Chitobiase/beta-hexosaminidase C-terminal domain	-3.00049	0.0224921	0.248915	down
Cg18631	1.19159	10.2483	3.2084	0.967126	103.518	12.2982	4.88275	38.9277	- && sp|Q5IS76|ACHA6_PANTR Neuronal acetylcholine receptor subunit alpha-6 OS=Pan troglodytes OX=9598 GN=CHRNA6 PE=2 SV=1 && PF02931:Neurotransmitter-gated ion-channel ligand binding domain	-2.97619	0.0225472	0.249092	down
Cg24276	23.8317	25.1548	22.4588	5.80276	2.8755	6.55902	23.8151	5.07909	- && - && PF07699:Putative ephrin-receptor like	2.22451	0.0225678	0.249092	up
Cg19453	868.667	379.186	520.831	182.787	170.613	425.516	589.561	259.639	- && sp|P30710|GPX5_RAT Epididymal secretory glutathione peroxidase OS=Rattus norvegicus OX=10116 GN=Gpx5 PE=2 SV=1 && PF00255:Glutathione peroxidase	1.18181	0.0225718	0.249092	up
Cg19030	17.8738	7.45328	17.1115	41.5864	77.6384	27.056	14.1462	48.7603	- && - && -	-1.79095	0.0225746	0.249092	down
Cg27653	20.257	13.9749	24.5977	101.548	52.7174	30.3355	19.6099	61.5337	- && - && PF13445:RING-type zinc-finger	-1.65087	0.0226178	0.249175	down
novel.2705	17.8738	57.763	32.084	119.924	114.061	62.3107	35.9069	98.7652	- && - && -	-1.45243	0.022623	0.249175	down
Cg22078	306.238	174.221	233.144	106.384	149.526	44.2734	237.867	100.061	- && sp|Q5E9S2|NFYA_BOVIN Nuclear transcription factor Y subunit alpha OS=Bos taurus OX=9913 GN=NFYA PE=2 SV=1 && PF02045:CCAAT-binding transcription factor (CBF-B/NF-YA) subunit B	1.25031	0.0226312	0.249175	up
novel.7264	0	0.931661	0	16.4411	4.79249	6.55902	0.310554	9.26422	- && - && -	-4.60876	0.0226457	1	down
Cg12353	9.5327	231.983	0	0	0	0	80.5054	0	- && - && PF00754:F5/8 type C domain	8.90571	0.0226743	0.249438	up
Cg28410	151.332	394.092	359.341	520.314	1649.58	269.74	301.588	813.21	- && sp|P62147|CALM1_BRAFL Calmodulin-1 OS=Branchiostoma floridae OX=7739 PE=2 SV=2 && PF13499:EF-hand domain pair	-1.43028	0.0226859	0.249438	down
Cg21049	61.9625	110.868	47.0566	274.664	124.605	136.92	73.2956	178.729	- && sp|Q91WN1|DNJC9_MOUSE DnaJ homolog subfamily C member 9 OS=Mus musculus OX=10090 GN=Dnajc9 PE=1 SV=2 && PF00226:DnaJ domain	-1.28301	0.0227653	0.250165	down
Cg25824	4.76635	10.2483	34.223	0	3.83399	0	16.4125	1.278	- && - && PF00643:B-box zinc finger	3.70627	0.0228622	0.251082	up
Cg11222	1.19159	0	35.2924	0	0	0.819877	12.1613	0.273292	- && sp|Q9UA35|S28A3_EPTST Solute carrier family 28 member 3 OS=Eptatretus stoutii OX=7765 GN=SLC28A3 PE=2 SV=1 && PF07670:Nucleoside recognition|PF07662:Na+ dependent nucleoside transporter C-terminus|PF01773:Na+ dependent nucleoside transporter N-terminus	5.21666	0.0228781	0.251108	up
Cg10401	220.444	282.293	223.519	90.9099	153.36	111.503	242.085	118.591	- && sp|O01761|UNC89_CAEEL Muscle M-line assembly protein unc-89 OS=Caenorhabditis elegans OX=6239 GN=unc-89 PE=1 SV=3 && PF07679:Immunoglobulin I-set domain	1.03015	0.0228914	0.251108	up
Cg26867	134.649	190.99	148.656	556.098	208.953	277.119	158.099	347.39	- && sp|P20825|POL2_DROME Retrovirus-related Pol polyprotein from transposon 297 OS=Drosophila melanogaster OX=7227 GN=pol PE=4 SV=1 && PF17919:RNase H-like domain found in reverse transcriptase	-1.13469	0.0229467	0.251388	down
Cg13979	123.925	148.134	83.4185	294.006	205.119	236.945	118.493	245.357	- && - && PF06172:Cupin superfamily (DUF985)	-1.04924	0.0229637	0.251388	down
novel.4587	9.5327	14.9066	7.48627	55.1262	28.755	31.1553	10.6418	38.3455	- && - && PF00589:Phage integrase family|PF05869:DNA N-6-adenine-methyltransferase (Dam)	-1.8424	0.0230344	0.2518	down
Cg05421	446.845	334.466	274.853	1174.09	426.532	649.343	352.055	749.989	- && sp|P80177|MIF_BOVIN Macrophage migration inhibitory factor OS=Bos taurus OX=9913 GN=MIF PE=1 SV=6 && PF01187:Macrophage migration inhibitory factor (MIF)	-1.0913	0.0230351	0.2518	down
novel.2956	0	1.86332	5.34734	6.76988	34.506	18.0373	2.40355	19.771	- && - && -	-3.02855	0.0230501	0.251816	down
Cg09118	15.4906	11.1799	12.8336	49.3234	35.4645	40.9939	13.1681	41.9273	- && - && -	-1.67438	0.0230674	0.251858	down
Cg06950	904.415	866.444	1962.47	687.627	588.518	569.815	1244.44	615.32	- && sp|P07686|HEXB_HUMAN Beta-hexosaminidase subunit beta OS=Homo sapiens OX=9606 GN=HEXB PE=1 SV=3 && PF14845:beta-acetyl hexosaminidase like|PF00728:Glycosyl hydrolase family 20, catalytic domain	1.01613	0.0231298	0.252264	up
Cg26114	67.9205	290.678	53.4734	53.1919	51.7589	32.7951	137.357	45.9153	- && sp|A5D7J3|KNOP1_BOVIN Lysine-rich nucleolar protein 1 OS=Bos taurus OX=9913 GN=KNOP1 PE=2 SV=2 && PF15477:Small acidic protein family	1.58428	0.0231338	0.252264	up
Cg15852	26.2149	40.0614	108.016	11.6055	10.5435	27.056	58.0975	16.4017	- && sp|Q4LDD4|ARAP1_MOUSE Arf-GAP with Rho-GAP domain, ANK repeat and PH domain-containing protein 1 OS=Mus musculus OX=10090 GN=Arap1 PE=1 SV=2 && PF00620:RhoGAP domain|PF00788:Ras association (RalGDS/AF-6) domain	1.81943	0.0231725	0.252264	up
Cg13467	35.7476	34.4714	51.3344	125.726	97.7669	71.3293	40.5178	98.2742	- && sp|Q0P4I1|CEP44_XENTR Centrosomal protein of 44 kDa OS=Xenopus tropicalis OX=8364 GN=cep44 PE=2 SV=1 && PF15007:Centrosomal spindle body, CEP44	-1.27769	0.0231742	0.252264	down
Cg18665	19.0654	8.38495	6.4168	0	1.917	0	11.289	0.638999	- && - && PF00929:Exonuclease	4.17351	0.0231933	0.252264	up
Cg06942	22.6402	65.2162	111.225	305.612	78.5969	186.932	66.3603	190.38	- && sp|Q9Y248|PSF2_HUMAN DNA replication complex GINS protein PSF2 OS=Homo sapiens OX=9606 GN=GINS2 PE=1 SV=1 && PF05916:GINS complex protein	-1.51872	0.0231973	0.252264	down
Cg23792	737.593	967.995	1422.39	365.574	502.253	692.796	1042.66	520.208	- && sp|Q9YGC1|BLNK_CHICK B-cell linker protein OS=Gallus gallus OX=9031 GN=BLNK PE=1 SV=1 && PF07647:SAM domain (Sterile alpha motif)|PF00017:SH2 domain	1.00287	0.023263	0.252669	up
Cg19414	75.07	62.4213	54.5428	224.373	87.2234	139.379	64.0114	150.325	- && sp|Q9NVE7|PANK4_HUMAN 4'-phosphopantetheine phosphatase OS=Homo sapiens OX=9606 GN=PANK4 PE=1 SV=1 && PF03630:Fumble|PF01937:Protein of unknown function DUF89	-1.23231	0.0232631	0.252669	down
Cg25045	32.1729	36.3348	16.042	101.548	39.2984	100.845	28.1832	80.5639	- && sp|P20483|MPIP_DROME M-phase inducer phosphatase OS=Drosophila melanogaster OX=7227 GN=stg PE=1 SV=2 && PF00581:Rhodanese-like domain	-1.51474	0.02328	0.252707	down
Cg23557	574.345	192.854	326.188	218.571	126.522	139.379	364.462	161.491	- && sp|P86856|MANL_MYTCA Nacrein-like protein (Fragment) OS=Mytilus californianus OX=6549 PE=1 SV=1 && PF00194:Eukaryotic-type carbonic anhydrase	1.17372	0.0232968	0.252741	up
Cg30120	0	3.72664	7.48627	6.76988	57.5099	16.3975	3.73764	26.8925	- && - && PF00059:Lectin C-type domain	-2.83412	0.0233304	0.25296	down
novel.4963	0	0	0	18.3754	0	9.01865	0	9.13135	- && - && -	-5.55077	0.0233601	1	down
Cg19636	421.822	198.444	204.268	37.7179	149.526	137.739	274.845	108.328	- && - && -	1.34173	0.0233957	0.253521	up
Cg17774	7.14952	10.2483	4.27787	9.67126	69.9704	23.7764	7.22522	34.4727	- && sp|O94778|AQP8_HUMAN Aquaporin-8 OS=Homo sapiens OX=9606 GN=AQP8 PE=1 SV=2 && PF00230:Major intrinsic protein	-2.24836	0.0234307	0.253646	down
Cg19909	165.631	307.448	245.977	79.3044	44.0909	168.895	239.685	97.43	- && - && PF00001:7 transmembrane receptor (rhodopsin family)	1.29722	0.0234343	0.253646	up
Cg27804	1.19159	2.79498	6.4168	36.7508	10.5435	17.2174	3.46779	21.5039	- && - && -	-2.62536	0.0234506	0.253656	down
Cg01174	630.35	554.338	765.739	306.579	184.032	460.771	650.142	317.127	- && - && PF03318:Clostridium epsilon toxin ETX/Bacillus mosquitocidal toxin MTX2	1.03498	0.0235113	0.253899	up
Cg07752	39.3224	11.1799	18.1809	57.0605	120.771	40.174	22.8944	72.6684	- && sp|O35449|PRRT1_MOUSE Proline-rich transmembrane protein 1 OS=Mus musculus OX=10090 GN=Prrt1 PE=1 SV=1 && PF04505:Interferon-induced transmembrane protein	-1.67342	0.0235119	0.253899	down
Cg19369	71.4952	180.742	122.989	359.771	173.488	316.473	125.075	283.244	- && sp|Q6DHN0|TMM53_DANRE Transmembrane protein 53 OS=Danio rerio OX=7955 GN=tmem53 PE=2 SV=1 && PF05705:Eukaryotic protein of unknown function (DUF829)	-1.17716	0.0235464	0.254041	down
Cg17036	281.215	603.716	417.092	228.242	239.625	172.994	434.008	213.62	- && sp|Q1W374|PMM_WHEAT Phosphomannomutase OS=Triticum aestivum OX=4565 GN=PMM PE=1 SV=1 && PF03332:Eukaryotic phosphomannomutase	1.02381	0.0235522	0.254041	up
Cg04821	146.565	154.656	221.38	82.2057	74.7629	92.6461	174.2	83.2049	- && sp|Q95XZ6|LAAT1_CAEEL Lysosomal amino acid transporter 1 OS=Caenorhabditis elegans OX=6239 GN=laat-1 PE=1 SV=2 && PF04193:PQ loop repeat	1.0655	0.0235896	0.254297	up
Cg23769	0	4.6583	0	0.967126	55.5929	9.01865	1.55277	21.8596	- && - && PF13445:RING-type zinc-finger	-3.763	0.0236043	0.25431	down
Cg30609	138.224	59.6263	31.0146	29.0138	28.755	16.3975	76.2883	24.7221	- && sp|Q03601|NHL1_CAEEL RING finger protein nhl-1 OS=Caenorhabditis elegans OX=6239 GN=nhl-1 PE=1 SV=2 && PF17170:6-bladed beta-propeller|PF01436:NHL repeat|PF13445:RING-type zinc-finger	1.62586	0.0237385	0.255462	up
Cg22920	396.799	747.192	616.013	277.565	173.488	392.721	586.668	281.258	- && - && -	1.06046	0.0238091	0.256075	up
Cg04470	63.1541	109.936	49.1955	203.097	139.941	159.876	74.0952	167.638	- && sp|P47727|CBR1_RAT Carbonyl reductase [NADPH] 1 OS=Rattus norvegicus OX=10116 GN=Cbr1 PE=1 SV=2 && PF00106:short chain dehydrogenase	-1.17501	0.023857	0.256358	down
Cg21429	706.611	860.854	238.491	201.162	321.097	277.938	601.986	266.733	- && sp|P24844|MYL9_HUMAN Myosin regulatory light polypeptide 9 OS=Homo sapiens OX=9606 GN=MYL9 PE=1 SV=4 && PF13499:EF-hand domain pair	1.17442	0.0238743	0.256358	up
novel.564	36.9392	5.58996	40.6398	9.67126	0.958499	0	27.723	3.54325	- && - && -	2.98125	0.0238766	0.256358	up
Cg09322	0	0.931661	0	1.93425	36.423	0	0.310554	12.7857	- && sp|Q13591|SEM5A_HUMAN Semaphorin-5A OS=Homo sapiens OX=9606 GN=SEMA5A PE=1 SV=3 && -	-5.07293	0.0239222	0.256567	down
Cg27173	2.38317	4.6583	16.042	31.9152	68.0534	12.2982	7.6945	37.4222	- && - && PF13927:Immunoglobulin domain	-2.27812	0.0239328	0.256567	down
Cg15882	2.38317	2.79498	0	12.5726	11.502	22.1367	1.72605	15.4038	- && sp|Q2TBR7|CENPS_BOVIN Centromere protein S OS=Bos taurus OX=9913 GN=CENPS PE=2 SV=1 && PF15630:CENP-S protein	-3.1521	0.0239371	0.256567	down
Cg20051	3671.28	1187.87	1442.71	1121.87	908.657	909.244	2100.62	979.922	- && sp|Q58DT4|P5CR1_BOVIN Pyrroline-5-carboxylate reductase 1, mitochondrial OS=Bos taurus OX=9913 GN=PYCR1 PE=2 SV=1 && PF14748:Pyrroline-5-carboxylate reductase dimerisation|PF03807:NADP oxidoreductase coenzyme F420-dependent	1.0999	0.0239567	0.25663	up
Cg18533	0	0	1.06947	6.76988	13.419	6.55902	0.356489	8.91596	- && - && -	-4.55377	0.0239941	1	down
Cg26136	2.38317	21.4282	1.06947	14.5069	95.8499	29.5156	8.29361	46.6241	- && - && -	-2.47138	0.0240004	0.256865	down
Cg06178	45.2803	10.2483	40.6398	292.072	6.70949	110.683	32.0561	136.488	- && - && PF00050:Kazal-type serine protease inhibitor domain	-2.09333	0.0240061	0.256865	down
Cg17426	177.547	255.275	268.436	237.913	1075.44	381.243	233.753	564.864	- && sp|P23098|DYHC_TRIGR Dynein beta chain, ciliary OS=Tripneustes gratilla OX=7673 PE=1 SV=1 && PF08385:Dynein heavy chain, N-terminal region 1|PF18199:Dynein heavy chain C-terminal domain|PF12781:ATP-binding dynein motor region|PF12780:P-loop containing dynein motor region D4|PF17857:AAA+ lid domain|PF12775:P-loop containing dynein motor region|PF12774:Hydrolytic ATP binding site of dynein mot…	-1.2724	0.0240884	0.257427	down
Cg23899	17.8738	40.9931	28.8756	47.3892	123.646	74.6088	29.2475	81.8815	- && sp|G5EDR5|FUTA_CAEEL Alpha-(1,3)-fucosyltransferase fut-1 OS=Caenorhabditis elegans OX=6239 GN=fut-1 PE=1 SV=1 && PF00852:Glycosyltransferase family 10 (fucosyltransferase) C-term|PF17039:Fucosyltransferase, N-terminal	-1.47984	0.0240924	0.257427	down
Cg00532	33.3644	0	0	0	0	0	11.1215	0	- && - && -	6.04596	0.0241304	0.257606	up
novel.6731	72.6868	661.479	627.777	149.905	171.571	173.814	453.981	165.097	- && - && -	1.45982	0.0242486	0.258573	up
Cg07488	86.9859	138.817	718.682	856.874	249.21	2000.5	314.828	1035.53	- && sp|Q38717|RNS4_ANTHI Ribonuclease S-4 OS=Antirrhinum hispanicum OX=49039 GN=S4 PE=2 SV=1 && PF00445:Ribonuclease T2 family	-1.71783	0.0242777	0.258736	down
Cg17471	198.995	44.7197	205.338	74.4687	23.9625	57.3914	149.684	51.9409	- && - && PF00019:Transforming growth factor beta like domain|PF00688:TGF-beta propeptide	1.52532	0.0243449	0.259156	up
Cg25857	1495.44	572.971	1152.89	447.779	524.299	614.088	1073.77	528.722	- && - && -	1.02161	0.0243552	0.259156	up
Cg30686	45.2803	8.38495	10.6947	69.6331	97.7669	47.5529	21.4533	71.6509	- && sp|Q99996|AKAP9_HUMAN A-kinase anchor protein 9 OS=Homo sapiens OX=9606 GN=AKAP9 PE=1 SV=4 && PF10495:Pericentrin-AKAP-450 domain of centrosomal targeting protein	-1.74996	0.0243698	0.259156	down
Cg11091	27.4065	0	5.34734	0	0	0.819877	10.9179	0.273292	- && - && -	5.05615	0.024379	0.259156	up
novel.5092	0	199.375	24.5977	0	0	0	74.6577	0	- && - && -	8.79693	0.0243863	0.259156	up
Cg04791	0	0	0	15.474	1.917	4.91926	0	7.43676	- && sp|A4IF63|TRIM2_BOVIN Tripartite motif-containing protein 2 OS=Bos taurus OX=9913 GN=TRIM2 PE=2 SV=1 && PF13445:RING-type zinc-finger|PF00917:MATH domain	-5.25356	0.0243932	1	down
novel.1256	4.76635	2.79498	12.8336	0	0	0	6.79831	0	- && - && -	5.33878	0.0244078	1	up
Cg05440	5.95794	3.72664	2.13893	42.5536	3.83399	26.2361	3.94117	24.2079	- && - && -	-2.62654	0.0244219	0.259388	down
novel.6747	732.826	530.115	1117.59	323.987	265.504	553.417	793.511	380.97	- && - && -	1.05793	0.024452	0.25956	up
Cg16138	8.34111	18.6332	45.9871	85.1071	97.7669	47.5529	24.3205	76.809	- && sp|Q32PA9|FKBP2_BOVIN Peptidyl-prolyl cis-trans isomerase FKBP2 OS=Bos taurus OX=9913 GN=FKBP2 PE=2 SV=1 && PF00254:FKBP-type peptidyl-prolyl cis-trans isomerase|PF13499:EF-hand domain pair	-1.65595	0.0244838	0.259614	down
Cg03768	92.9438	91.3027	94.1131	13.5398	40.2569	50.0125	92.7866	34.6031	- && sp|Q6P3S6|FBX42_HUMAN F-box only protein 42 OS=Homo sapiens OX=9606 GN=FBXO42 PE=1 SV=1 && PF12937:F-box-like|PF13418:Galactose oxidase, central domain	1.41981	0.0244848	0.259614	up
Cg23759	1.19159	5.58996	0	13.5398	15.336	27.056	2.26052	18.6439	- && - && PF01683:EB module	-3.00908	0.0245083	0.259716	down
Cg15946	160.864	105.278	194.643	64.7975	25.8795	92.6461	153.595	61.1077	- && - && -	1.32689	0.0245727	0.260251	up
novel.6969	0	1.86332	0	110.252	0	71.3293	0.621107	60.5272	- && - && -	-6.56387	0.0246124	0.26041	down
Cg20800	7262.72	337.261	2896.12	368.475	1012.17	121.342	3498.7	500.664	- && - && -	2.80495	0.0246261	0.26041	up
Cg13875	57.1962	23.2915	110.155	17.4083	23.004	19.6771	63.5476	20.0298	- && - && -	1.66426	0.0246348	0.26041	up
Cg06895	17.8738	107.141	29.9451	2.90138	17.253	16.3975	51.6533	12.184	- && - && -	2.08411	0.0246907	0.260544	up
Cg17825	22.6402	1.86332	2.13893	52.2248	59.4269	18.8572	8.88081	43.503	- && sp|Q866E6|FUT1_AOTAZ Galactoside alpha-(1,2)-fucosyltransferase 1 OS=Aotus azarae OX=30591 GN=FUT1 PE=3 SV=1 && PF01531:Glycosyl transferase family 11	-2.31126	0.0246944	0.260544	down
Cg28452	600.56	1145.01	1252.35	1248.56	3985.44	1520.87	999.306	2251.62	- && sp|P24367|PPIB_CHICK Peptidyl-prolyl cis-trans isomerase B OS=Gallus gallus OX=9031 GN=PPIB PE=2 SV=1 && PF00160:Cyclophilin type peptidyl-prolyl cis-trans isomerase/CLD	-1.17176	0.0247321	0.260612	down
Cg00193	50.0467	170.494	321.91	13.5398	18.2115	118.062	180.817	49.9379	- && - && PF00209:Sodium:neurotransmitter symporter family	1.85298	0.0247708	0.260874	up
Cg13812	399.182	30.7448	299.451	17.4083	70.9289	120.522	243.126	69.6197	- && sp|Q9JLB4|CUBN_MOUSE Cubilin OS=Mus musculus OX=10090 GN=Cubn PE=1 SV=3 && PF00431:CUB domain	1.80169	0.0247901	0.26093	up
Cg30281	11.9159	285.088	504.789	14.5069	70.9289	112.323	267.264	65.9197	- && sp|Q9IB86|CALRL_PAROL Calcitonin gene-related peptide type 1 receptor OS=Paralichthys olivaceus OX=8255 GN=calcrl PE=2 SV=1 && PF00002:7 transmembrane receptor (Secretin family)|PF02793:Hormone receptor domain	2.01858	0.0248427	0.261337	up
novel.3708	7.14952	2.79498	48.126	3.86851	1.917	0	19.3568	1.9285	- && - && -	3.34744	0.0248669	0.261445	up
Cg26666	0	2.79498	0	23.211	4.79249	13.118	0.931661	13.7072	- && - && -	-3.80377	0.0249049	0.261697	down
Cg14010	434.929	128.569	276.992	796.912	650.821	422.237	280.164	623.323	- && sp|Q9NWM8|FKB14_HUMAN Peptidyl-prolyl cis-trans isomerase FKBP14 OS=Homo sapiens OX=9606 GN=FKBP14 PE=1 SV=1 && PF00254:FKBP-type peptidyl-prolyl cis-trans isomerase|PF13499:EF-hand domain pair	-1.15479	0.0249728	0.262208	down
Cg24014	0	0.931661	3.2084	28.0467	9.58499	6.55902	1.38002	14.7302	- && - && -	-3.40199	0.0249815	0.262208	down
Cg10979	123.925	19.5649	32.084	14.5069	23.9625	7.3789	58.5247	15.2828	- && sp|Q99758|ABCA3_HUMAN Phospholipid-transporting ATPase ABCA3 OS=Homo sapiens OX=9606 GN=ABCA3 PE=1 SV=2 && PF00005:ABC transporter|PF12698:ABC-2 family transporter protein	1.93755	0.0250318	0.262291	up
Cg07589	233.551	163.972	143.309	24.1782	91.0574	99.2052	180.277	71.4802	- && sp|Q9JLY7|DUS14_MOUSE Dual specificity protein phosphatase 14 OS=Mus musculus OX=10090 GN=Dusp14 PE=2 SV=2 && PF00782:Dual specificity phosphatase, catalytic domain	1.33254	0.0250379	0.262291	up
novel.504	15.4906	65.2162	5.34734	123.792	90.0989	81.9877	28.6847	98.6263	- && - && -	-1.77308	0.0250454	0.262291	down
Cg02535	137.033	102.483	23.5283	25.1453	37.3814	1.63975	87.6812	21.3888	- && - && PF00001:7 transmembrane receptor (rhodopsin family)	2.03977	0.0250714	0.262416	up
Cg28413	7.14952	28.8815	9.62521	67.6988	47.9249	40.174	15.2187	51.9326	- && sp|P04464|CALM_WHEAT Calmodulin OS=Triticum aestivum OX=4565 PE=1 SV=3 && PF00036:EF hand	-1.75746	0.0251701	0.263281	down
Cg18008	101.285	13.0432	22.4588	15.474	11.502	3.27951	45.5957	10.0852	- && sp|Q8CFH6|SIK2_MOUSE Serine/threonine-protein kinase SIK2 OS=Mus musculus OX=10090 GN=Sik2 PE=1 SV=1 && PF00069:Protein kinase domain	2.17924	0.0251822	0.263281	up
Cg29237	0	0	1.06947	25.1453	0	9.01865	0.356489	11.388	- && - && -	-4.9071	0.0252077	0.263401	down
Cg19178	13.1075	32.6081	8.55574	10.6384	215.662	23.7764	18.0904	83.359	- && sp|P70549|NAC3_RAT Sodium/calcium exchanger 3 OS=Rattus norvegicus OX=10116 GN=Slc8a3 PE=1 SV=1 && PF16494:C-terminal extension of sodium/calcium exchanger domain|PF01699:Sodium/calcium exchanger protein|PF03160:Calx-beta domain	-2.19799	0.0252421	0.263577	down
Cg17968	16.6822	19.5649	37.4314	19.3425	146.65	80.348	24.5595	82.1136	- && sp|Q08BC4|STPG2_DANRE Sperm-tail PG-rich repeat-containing protein 2 OS=Danio rerio OX=7955 GN=stpg2 PE=2 SV=1 && -	-1.74094	0.0252613	0.263577	down
Cg05005	1.19159	0	3.2084	29.0138	5.75099	10.6584	1.46666	15.1411	- && sp|P15870|H1D_STRPU Histone H1-delta OS=Strongylocentrotus purpuratus OX=7668 PE=3 SV=1 && PF00538:linker histone H1 and H5 family	-3.38721	0.025268	0.263577	down
Cg24526	54.813	64.2846	35.2924	15.474	17.253	20.4969	51.4633	17.7413	- && sp|Q4R910|UBAC2_MACFA Ubiquitin-associated domain-containing protein 2 OS=Macaca fascicularis OX=9541 GN=UBAC2 PE=2 SV=1 && PF00627:UBA/TS-N domain	1.53546	0.0252825	0.263577	up
Cg04289	2.38317	11.1799	27.8062	6.76988	119.812	69.6896	13.7898	65.4239	- && sp|P09487|PPBT_BOVIN Alkaline phosphatase, tissue-nonspecific isozyme OS=Bos taurus OX=9913 GN=ALPL PE=1 SV=2 && PF00245:Alkaline phosphatase	-2.24303	0.025309	0.263577	down
novel.534	0	0	0	4.83563	8.62649	7.3789	0	6.94701	- && - && -	-5.15677	0.0253845	1	down
Cg06767	19.0654	32.6081	28.8756	99.614	40.2569	81.1679	26.8497	73.6796	- && sp|Q8I7Z8|HAM_DROME Transcription factor hamlet OS=Drosophila melanogaster OX=7227 GN=ham PE=2 SV=1 && PF00096:Zinc finger, C2H2 type	-1.45297	0.0253861	0.264196	down
Cg15643	28.5981	68.0112	132.614	16.4411	25.8795	32.7951	76.4078	25.0386	- && - && PF07679:Immunoglobulin I-set domain	1.60832	0.0254046	0.264196	up
novel.5187	8.34111	27.0182	33.1535	2.90138	1.917	7.3789	22.8376	4.06576	- && - && -	2.47853	0.0254458	0.264379	up
novel.69	8.34111	0.931661	0	58.9947	38.3399	0	3.09092	32.4449	- && - && -	-3.41651	0.0254707	0.264379	down
Cg25146	40.514	12.1116	0	2.90138	0	0	17.5419	0.967126	- && sp|Q5RFW0|SCAR5_DANRE Scavenger receptor class A member 5 OS=Danio rerio OX=7955 GN=scara5 PE=3 SV=1 && PF00530:Scavenger receptor cysteine-rich domain|PF00100:Zona pellucida-like domain	4.20513	0.0255137	0.264601	up
Cg18750	126.308	33.5398	37.4314	173.116	161.986	165.615	65.7598	166.906	- && - && -	-1.34866	0.0255204	0.264601	down
novel.4409	16.6822	7.45328	20.3199	52.2248	77.6384	22.1367	14.8185	50.6666	- && - && -	-1.77763	0.0255384	0.264636	down
Cg08618	29.7897	39.1297	51.3344	49.3234	211.828	76.2486	40.0846	112.467	- && sp|O75626|PRDM1_HUMAN PR domain zinc finger protein 1 OS=Homo sapiens OX=9606 GN=PRDM1 PE=1 SV=2 && PF00096:Zinc finger, C2H2 type	-1.48682	0.025552	0.264636	down
Cg05140	164.439	130.432	150.795	422.634	281.799	204.149	148.555	302.861	- && - && -	-1.02777	0.0255931	0.264767	down
Cg14874	25.0233	16.7699	16.042	44.4878	73.8044	46.733	19.2784	55.0084	- && - && PF17664:Family of unknown function (DUF5526)	-1.51597	0.0256054	0.264767	down
Cg02708	107.243	85.7128	203.199	58.0276	49.8419	61.4908	132.051	56.4534	- && sp|O14522|PTPRT_HUMAN Receptor-type tyrosine-protein phosphatase T OS=Homo sapiens OX=9606 GN=PTPRT PE=1 SV=6 && PF00102:Protein-tyrosine phosphatase	1.22506	0.0256071	0.264767	up
Cg17264	15.4906	8.38495	9.62521	0	0.958499	1.63975	11.1669	0.866084	- && - && -	3.65593	0.0256447	0.264918	up
Cg28891	7.14952	28.8815	8.55574	60.929	81.4724	22.1367	14.8622	54.846	- && sp|Q640B4|MUS81_XENTR Crossover junction endonuclease MUS81 OS=Xenopus tropicalis OX=8364 GN=mus81 PE=2 SV=1 && PF02732:ERCC4 domain	-1.87056	0.0256741	0.264918	down
novel.2550	7.14952	0	11.7641	41.5864	32.589	24.5963	6.30456	32.9239	- && - && -	-2.39738	0.0256828	0.264918	down
Cg28958	1070.05	1384.45	1379.61	217.603	739.003	797.741	1278.04	584.782	- && sp|Q9ULT8|HECD1_HUMAN E3 ubiquitin-protein ligase HECTD1 OS=Homo sapiens OX=9606 GN=HECTD1 PE=1 SV=3 && PF07738:Sad1 / UNC-like C-terminal|PF00632:HECT-domain (ubiquitin-transferase)|PF06701:Mib_herc2|PF12796:Ankyrin repeats (3 copies)	1.12777	0.025691	0.264918	up
Cg06787	1.19159	18.6332	19.2504	14.5069	118.854	44.2734	13.0251	59.2114	- && - && -	-2.17559	0.0256924	0.264918	down
Cg12714	34.556	96.8927	351.855	67.6988	45.0494	42.6336	161.101	51.794	- && - && PF13855:Leucine rich repeat	1.63807	0.0257211	0.265068	up
Cg16325	39.3224	49.378	48.126	164.411	65.1779	102.485	45.6088	110.691	- && - && -	-1.27767	0.0258311	0.265518	down
Cg14632	89.369	181.674	141.17	20.3097	32.589	95.9256	137.404	49.6081	- && sp|E9QAT4|SC16A_MOUSE Protein transport protein Sec16A OS=Mus musculus OX=10090 GN=Sec16a PE=1 SV=1 && PF12932:Vesicle coat trafficking protein Sec16 mid-region|PF12931:Sec23-binding domain of Sec16	1.46667	0.0258466	0.265518	up
Cg20186	226.402	389.434	394.633	127.661	163.903	208.249	336.823	166.604	- && sp|Q59E55|NAB_DROME NGFI-A-binding protein homolog OS=Drosophila melanogaster OX=7227 GN=nab PE=1 SV=3 && PF04904:NAB conserved region 1 (NCD1)|PF04905:NAB conserved region 2 (NCD2)	1.01545	0.0258616	0.265518	up
Cg13736	61.9625	45.6514	75.9322	190.524	86.2649	145.938	61.182	140.909	- && sp|P32896|PDC2_YEAST Protein PDC2 OS=Saccharomyces cerevisiae (strain ATCC 204508 / S288c) OX=559292 GN=PDC2 PE=1 SV=2 && PF03184:DDE superfamily endonuclease|PF03221:Tc5 transposase DNA-binding domain	-1.20496	0.0258692	0.265518	down
Cg17866	67.9205	67.0796	66.307	10.6384	32.589	28.6957	67.1023	23.9744	- && sp|Q8N461|FXL16_HUMAN F-box/LRR-repeat protein 16 OS=Homo sapiens OX=9606 GN=FBXL16 PE=2 SV=2 && -	1.48288	0.0258771	0.265518	up
novel.6337	0	4.6583	20.3199	0	0	0	8.32606	0	- && - && -	5.6332	0.0258846	1	up
novel.2634	0	0	0	23.211	0	4.09939	0	9.10347	- && - && -	-5.54517	0.0258888	1	down
Cg11620	19.0654	7.45328	8.55574	42.5536	46.9664	30.3355	11.6915	39.9518	- && - && -	-1.78244	0.0258922	0.265518	down
Cg17682	131.075	107.141	233.144	58.9947	81.4724	69.6896	157.12	70.0522	- && - && PF00622:SPRY domain	1.16496	0.0259095	0.265518	up
Cg04691	14.299	30.7448	32.084	52.2248	56.5514	107.404	25.7093	72.0601	- && - && -	-1.48395	0.0259205	0.265518	down
Cg29965	0	1.86332	0	6.76988	15.336	11.4783	0.621107	11.1947	- && sp|Q9VG08|YELF2_DROME L-dopachrome tautomerase yellow-f2 OS=Drosophila melanogaster OX=7227 GN=yellow-f2 PE=1 SV=2 && PF03022:Major royal jelly protein	-4.08198	0.0259429	0.265599	down
Cg09375	11.9159	35.4031	27.8062	32.8823	300.969	7.3789	25.0417	113.743	- && sp|Q9U3W6|MAB21_DROME Protein mab-21 OS=Drosophila melanogaster OX=7227 GN=mab-21 PE=2 SV=2 && PF00569:Zinc finger, ZZ type|PF03281:Mab-21 protein	-2.17933	0.0259603	0.265632	down
Cg16543	48.8551	34.4714	62.0291	98.6469	152.401	89.3666	48.4519	113.472	- && sp|Q14DL3|LRIQ3_MOUSE Leucine-rich repeat and IQ domain-containing protein 3 OS=Mus musculus OX=10090 GN=Lrriq3 PE=2 SV=1 && -	-1.22895	0.0259816	0.265705	down
novel.6729	13.1075	1.86332	5.34734	0	0	0	6.77271	0	- && - && -	5.3296	0.0260874	1	up
Cg11207	0	0	0	0	20.1285	6.55902	0	8.89583	- && sp|Q2IBC1|CAV1_RHIFE Caveolin-1 OS=Rhinolophus ferrumequinum OX=59479 GN=CAV1 PE=3 SV=1 && PF01146:Caveolin	-5.5128	0.0260951	1	down
Cg18692	235.934	160.246	173.254	373.311	542.51	247.603	189.811	387.808	- && sp|Q0E908|HIL_DROME Hillarin OS=Drosophila melanogaster OX=7227 GN=Hil PE=1 SV=1 && -	-1.0312	0.0261015	0.266697	down
Cg21230	0	0	0	6.76988	2.8755	11.4783	0	7.04122	- && sp|Q8N0N3|BGBP_PENMO Beta-1,3-glucan-binding protein OS=Penaeus monodon OX=6687 PE=2 SV=1 && PF00722:Glycosyl hydrolases family 16	-5.17795	0.0261057	1	down
Cg22988	495.7	447.197	443.829	95.7455	294.259	258.261	462.242	216.089	- && sp|Q1LY51|ZN704_DANRE Zinc finger protein 704 OS=Danio rerio OX=7955 GN=znf704 PE=3 SV=2 && PF15997:Domain of unknown function (DUF4772)	1.09654	0.0261508	0.266697	up
Cg27831	32.1729	18.6332	29.9451	106.384	54.6344	55.7517	26.9171	72.2567	- && sp|Q6IQE9|ALKB6_DANRE Alpha-ketoglutarate-dependent dioxygenase alkB homolog 6 OS=Danio rerio OX=7955 GN=alkbh6 PE=2 SV=1 && PF13532:2OG-Fe(II) oxygenase superfamily	-1.42761	0.026152	0.266697	down
Cg10250	185.888	196.58	240.63	13.5398	68.0534	137.739	207.699	73.1109	- && sp|Q8WWW0|RASF5_HUMAN Ras association domain-containing protein 5 OS=Homo sapiens OX=9606 GN=RASSF5 PE=1 SV=1 && PF00788:Ras association (RalGDS/AF-6) domain|PF16517:Novel Ras effector 1 C-terminal SARAH (Sav/Rassf/Hpo) domain	1.50382	0.0261565	0.266697	up
Cg19018	9.5327	11.1799	27.8062	21.2768	130.356	31.9752	16.1729	61.2026	- && sp|Q9Y663|HS3SA_HUMAN Heparan sulfate glucosamine 3-O-sulfotransferase 3A1 OS=Homo sapiens OX=9606 GN=HS3ST3A1 PE=1 SV=1 && PF00685:Sulfotransferase domain	-1.91875	0.0261613	0.266697	down
Cg01827	0	2.79498	5.34734	21.2768	10.5435	26.2361	2.71411	19.3521	- && sp|Q96MB7|HARB1_HUMAN Putative nuclease HARBI1 OS=Homo sapiens OX=9606 GN=HARBI1 PE=1 SV=1 && -	-2.81917	0.0261641	0.266697	down
Cg15334	1.19159	16.7699	25.6672	2.90138	0	0	14.5429	0.967126	- && - && PF00001:7 transmembrane receptor (rhodopsin family)	3.94273	0.0261989	0.266907	up
Cg20006	243.084	181.674	100.53	75.4359	49.8419	101.665	175.096	75.6475	- && sp|Q96AB6|NTAN1_HUMAN Protein N-terminal asparagine amidohydrolase OS=Homo sapiens OX=9606 GN=NTAN1 PE=1 SV=3 && PF14736:Protein N-terminal asparagine amidohydrolase	1.20882	0.0262552	0.267256	up
Cg18823	42.8971	27.0182	21.3893	101.548	73.8044	59.851	30.4349	78.4012	- && sp|P34056|AP2A_MOUSE Transcription factor AP-2-alpha OS=Mus musculus OX=10090 GN=Tfap2a PE=1 SV=2 && PF03299:Transcription factor AP-2	-1.36794	0.0262733	0.267256	down
Cg13910	608.901	817.066	816.004	252.42	289.467	572.274	747.324	371.387	- && sp|Q96PQ7|KLHL5_HUMAN Kelch-like protein 5 OS=Homo sapiens OX=9606 GN=KLHL5 PE=1 SV=3 && PF00651:BTB/POZ domain|PF01344:Kelch motif|PF07707:BTB And C-terminal Kelch	1.00829	0.026284	0.267256	up
Cg23143	755.466	1085.38	960.382	130.562	522.382	573.094	933.744	408.679	- && sp|Q5ZIX8|KDM3A_CHICK Lysine-specific demethylase 3A OS=Gallus gallus OX=9031 GN=KDM3A PE=2 SV=1 && PF02373:JmjC domain, hydroxylase	1.19182	0.0262903	0.267256	up
Cg08806	352.71	15.8382	274.853	52.2248	95.8499	40.174	214.467	62.7496	- && sp|Q99M80|PTPRT_MOUSE Receptor-type tyrosine-protein phosphatase T OS=Mus musculus OX=10090 GN=Ptprt PE=1 SV=2 && PF00102:Protein-tyrosine phosphatase	1.77286	0.0263369	0.267584	up
Cg16643	0	0	0	16.4411	0	9.83853	0	8.75989	- && sp|P98158|LRP2_RAT Low-density lipoprotein receptor-related protein 2 OS=Rattus norvegicus OX=10116 GN=Lrp2 PE=1 SV=1 && PF14670:Coagulation Factor Xa inhibitory site|PF00058:Low-density lipoprotein receptor repeat class B	-5.49117	0.0263608	1	down
Cg23114	168.014	221.735	180.74	86.0742	113.103	83.6275	190.163	94.2682	- && sp|Q8R5F7|IFIH1_MOUSE Interferon-induced helicase C domain-containing protein 1 OS=Mus musculus OX=10090 GN=Ifih1 PE=1 SV=1 && PF00271:Helicase conserved C-terminal domain|PF11648:C-terminal domain of RIG-I|PF16739:Caspase recruitment domain|PF04851:Type III restriction enzyme, res subunit|PF18119:RIG-I receptor C-terminal domain	1.01353	0.0263765	0.267759	up
Cg28221	1.19159	18.6332	4.27787	5.80276	103.518	28.6957	8.03422	46.0054	- && - && -	-2.49961	0.0263826	0.267759	down
novel.7323	0	0	0	10.6384	0	15.5777	0	8.73869	- && - && PF00643:B-box zinc finger	-5.48921	0.0264075	1	down
Cg28592	135.841	499.37	142.239	1137.34	345.06	514.063	259.15	665.488	- && sp|A0JMK9|CAF1A_DANRE Chromatin assembly factor 1 subunit A OS=Danio rerio OX=7955 GN=chaf1a PE=1 SV=1 && PF12253:Chromatin assembly factor 1 subunit A|PF15539:CAF1 complex subunit p150, region binding to CAF1-p60 at C-term|PF11600:Chromatin assembly factor 1 complex p150 subunit, N-terminal	-1.35926	0.0264187	0.267979	down
Cg21524	7.14952	13.0432	24.5977	26.1124	49.8419	76.2486	14.9302	50.7343	- && sp|Q99102|MUC4_HUMAN Mucin-4 OS=Homo sapiens OX=9606 GN=MUC4 PE=1 SV=4 && PF07645:Calcium-binding EGF domain|PF12947:EGF domain|PF00008:EGF-like domain|PF14670:Coagulation Factor Xa inhibitory site|PF12662:Complement Clr-like EGF-like	-1.76338	0.0264366	0.268016	down
Cg16270	2.38317	0.931661	1.06947	18.3754	13.419	7.3789	1.46143	13.0578	- && - && -	-3.18069	0.0264924	0.268149	down
Cg04256	25.0233	82.9178	65.2375	139.266	173.488	110.683	57.7262	141.146	- && sp|Q6NZQ0|CC189_MOUSE Coiled-coil domain-containing protein 189 OS=Mus musculus OX=10090 GN=Ccdc189 PE=1 SV=2 && PF14769:Flagellar C1a complex subunit C1a-32	-1.28513	0.0264949	0.268149	down
Cg27435	29.7897	28.8815	16.042	97.6798	39.2984	71.3293	24.9044	69.4358	- && sp|Q3TLR7|DTL_MOUSE Denticleless protein homolog OS=Mus musculus OX=10090 GN=Dtl PE=1 SV=2 && PF00400:WD domain, G-beta repeat	-1.47936	0.0265339	0.268149	down
Cg15323	36.9392	15.8382	40.6398	105.417	91.0574	53.292	31.1391	83.2554	- && - && PF12796:Ankyrin repeats (3 copies)	-1.42234	0.026571	0.268149	down
Cg07226	618.434	272.045	149.725	475.826	982.461	976.474	346.735	811.587	- && sp|Q6NT55|CP4FN_HUMAN Cytochrome P450 4F22 OS=Homo sapiens OX=9606 GN=CYP4F22 PE=1 SV=1 && PF00067:Cytochrome P450	-1.22778	0.0265804	0.268149	down
Cg13024	844.835	1744.07	2008.46	199.228	393.943	1212.6	1532.45	601.923	- && sp|P05370|G6PD_RAT Glucose-6-phosphate 1-dehydrogenase OS=Rattus norvegicus OX=10116 GN=G6pdx PE=1 SV=3 && PF02781:Glucose-6-phosphate dehydrogenase, C-terminal domain|PF00479:Glucose-6-phosphate dehydrogenase, NAD binding domain	1.34784	0.0265812	0.268149	up
Cg17011	113.201	155.587	135.822	31.9152	70.9289	72.9691	134.87	58.6044	- && sp|Q8N122|RPTOR_HUMAN Regulatory-associated protein of mTOR OS=Homo sapiens OX=9606 GN=RPTOR PE=1 SV=1 && PF14538:Raptor N-terminal CASPase like domain	1.20174	0.0265873	0.268149	up
Cg18354	66.7289	60.5579	117.641	164.411	233.874	140.199	81.6427	179.495	- && sp|Q8TBZ9|TEX47_HUMAN Testis-expressed protein 47 OS=Homo sapiens OX=9606 GN=TEX47 PE=1 SV=1 && -	-1.13654	0.0266241	0.268319	down
Cg15812	79.8364	60.5579	70.5848	165.379	118.854	158.236	70.3264	147.49	- && - && PF01545:Cation efflux family	-1.07007	0.0266616	0.268552	down
Cg25220	81.0279	126.706	110.155	34.8165	54.6344	49.1926	105.963	46.2145	- && sp|Q28178|TSP1_BOVIN Thrombospondin-1 OS=Bos taurus OX=9913 GN=THBS1 PE=2 SV=2 && PF00057:Low-density lipoprotein receptor domain class A|PF00090:Thrombospondin type 1 domain	1.19783	0.026682	0.268613	up
Cg19701	11.9159	40.0614	14.9725	2.90138	0.958499	7.3789	22.3166	3.74626	- && - && -	2.56229	0.0267067	0.268659	up
Cg01956	0	16.7699	7.48627	0	0	0	8.08539	0	- && - && -	5.5943	0.0267845	1	up
Cg09956	3056.42	1151.53	1605.27	1095.75	602.896	1094.54	1937.74	931.062	- && - && -	1.05716	0.02689	0.269982	up
Cg24716	0	31.6765	0	0	0	0	10.5588	0	- && sp|D3YXG0|HMCN1_MOUSE Hemicentin-1 OS=Mus musculus OX=10090 GN=Hmcn1 PE=1 SV=1 && PF00090:Thrombospondin type 1 domain|PF17517:IgGFc binding protein|PF00057:Low-density lipoprotein receptor domain class A	5.97917	0.0269071	0.270009	up
Cg30028	258.574	64.2846	117.641	421.667	383.399	233.665	146.833	346.244	- && sp|Q9H015|S22A4_HUMAN Solute carrier family 22 member 4 OS=Homo sapiens OX=9606 GN=SLC22A4 PE=1 SV=3 && PF00083:Sugar (and other) transporter	-1.23976	0.0269421	0.270074	down
Cg11200	64.3457	54.0363	54.5428	17.4083	22.0455	25.4162	57.6416	21.6233	- && sp|O93297|CP2K4_ONCMY Cytochrome P450 2K4 OS=Oncorhynchus mykiss OX=8022 GN=cyp2k4 PE=2 SV=1 && PF01146:Caveolin|PF00067:Cytochrome P450	1.41195	0.0269425	0.270074	up
Cg12672	89.369	13.0432	378.591	53.1919	23.9625	51.6523	160.335	42.9356	- && - && PF01683:EB module|PF08685:GON domain	1.89988	0.0269705	0.27021	up
novel.3307	0	0	0	34.8165	0	0	0	11.6055	- && - && -	-5.89528	0.0269979	0.27034	down
Cg18315	29.7897	82.9178	63.0986	191.491	86.2649	153.317	58.602	143.691	- && - && PF08286:Spc24 subunit of Ndc80	-1.29023	0.0270411	0.27039	down
Cg28502	70.3037	23.2915	11.7641	108.318	201.285	36.8945	35.1198	115.499	- && sp|H9J9M0|CDA1_BOMMO Chitin deacetylase 1 OS=Bombyx mori OX=7091 GN=CDA1 PE=1 SV=1 && PF01522:Polysaccharide deacetylase	-1.72177	0.0270673	0.27039	down
novel.2373	0	0	0	166.346	0	66.4101	0	77.5853	- && - && -	-8.63768	0.0270797	0.27039	down
novel.4727	588.644	725.764	555.054	2426.52	1533.6	419.777	623.154	1459.97	- && - && -	-1.22802	0.0271042	0.27039	down
Cg16819	0	7.45328	2.13893	1.93425	59.4269	18.8572	3.19741	26.7395	- && - && -	-3.03374	0.027115	0.27039	down
Cg16803	327.687	255.275	318.701	79.3044	190.741	162.336	300.554	144.127	- && sp|P54802|ANAG_HUMAN Alpha-N-acetylglucosaminidase OS=Homo sapiens OX=9606 GN=NAGLU PE=1 SV=2 && PF12971:Alpha-N-acetylglucosaminidase (NAGLU) N-terminal domain|PF05089:Alpha-N-acetylglucosaminidase (NAGLU) tim-barrel domain|PF12972:Alpha-N-acetylglucosaminidase (NAGLU) C-terminal domain	1.05955	0.0271192	0.27039	up
Cg15353	54.813	86.6444	56.6818	108.318	197.451	134.46	66.0464	146.743	- && - && PF09458:H-type lectin domain	-1.14925	0.0271263	0.27039	down
Cg05906	281.215	529.183	497.302	150.872	75.7214	325.491	435.9	184.028	- && sp|O13016|PTN1_CHICK Tyrosine-protein phosphatase non-receptor type 1 OS=Gallus gallus OX=9031 GN=PTPN1 PE=1 SV=1 && PF00102:Protein-tyrosine phosphatase	1.24319	0.0271329	0.27039	up
novel.1905	0	0	0	1.93425	19.17	1.63975	0	7.58133	- && - && -	-5.28051	0.0271891	1	down
Cg11960	9.5327	15.8382	12.8336	80.2715	9.58499	56.5715	12.7348	48.8093	- && sp|A4IF63|TRIM2_BOVIN Tripartite motif-containing protein 2 OS=Bos taurus OX=9913 GN=TRIM2 PE=2 SV=1 && PF13445:RING-type zinc-finger	-1.93456	0.0271909	0.270825	down
Cg28575	3.57476	66.1479	14.9725	23.211	280.84	64.7703	28.2317	122.94	- && - && PF15250:Raftlin	-2.11491	0.0272571	0.271221	down
Cg27060	66.7289	92.2344	166.837	265.96	288.508	165.615	108.6	240.028	- && sp|Q3V0Q6|SPAG8_MOUSE Sperm-associated antigen 8 OS=Mus musculus OX=10090 GN=Spag8 PE=1 SV=1 && -	-1.14313	0.0272597	0.271221	down
Cg26092	21.4486	12.1116	24.5977	0	6.70949	0.819877	19.386	2.50979	- && - && -	2.95948	0.0272793	0.271272	up
novel.4946	8.34111	0	16.042	0	0	0	8.12771	0	- && - && -	5.59519	0.0272889	1	up
Cg19383	2193.71	3374.47	605.319	577.374	1098.44	931.381	2057.84	869.065	- && sp|O17320|ACT_CRAGI Actin OS=Crassostrea gigas OX=29159 PE=2 SV=1 && PF00022:Actin	1.24364	0.0272952	0.271286	up
Cg24363	2.38317	7.45328	38.5008	0.967126	0	3.27951	16.1124	1.41555	- && - && PF13304:AAA domain, putative AbiEii toxin, Type IV TA system	3.47941	0.0273132	0.27132	up
Cg19799	5.95794	0	4.27787	35.7837	17.253	13.118	3.41194	22.0516	- && - && -	-2.71791	0.0273318	0.271362	down
Cg11269	8.34111	7.45328	9.62521	10.6384	65.1779	29.5156	8.4732	35.1106	- && - && PF08017:Fibrinogen binding protein|PF11669:WW domain-binding protein 1	-2.05182	0.0275437	0.273	down
Cg21865	1456.12	1547.49	1775.32	505.807	423.656	1325.74	1592.97	751.735	- && - && -	1.08304	0.0275566	0.273	up
Cg16391	0	0	0	4.83563	5.75099	9.83853	0	6.80838	- && - && PF00520:Ion transport protein	-5.12895	0.0275608	1	down
Cg03745	4162.21	1223.27	2501.48	679.89	1280.55	1619.26	2628.99	1193.23	- && sp|P05153|PCKGC_CHICK Phosphoenolpyruvate carboxykinase, cytosolic [GTP] OS=Gallus gallus OX=9031 GN=PCK1 PE=2 SV=1 && PF17297:Phosphoenolpyruvate carboxykinase N-terminal domain|PF00821:Phosphoenolpyruvate carboxykinase C-terminal P-loop domain	1.13938	0.0275807	0.273	up
Cg17547	652.99	400.614	1845.9	232.11	682.451	83.6275	966.502	332.73	- && - && -	1.53878	0.0276053	0.273	up
Cg29852	0	0	0	0	34.506	0	0	11.502	- && - && -	-5.8826	0.027628	0.273	down
novel.4470	0	0	0	0	34.506	0	0	11.502	- && Q4ZJM9.1 RecName: Full=Complement C1q-like protein 4; AltName: Full=C1q and tumor necrosis factor-related protein 11; Short=C1q/TNF-related protein 11; Short=C1qTNF11; Short=CTRP11; Flags: Precursor && -	-5.8826	0.027628	0.273	down
Cg02911	1.19159	9.31661	4.27787	4.83563	63.2609	20.4969	4.92869	29.5312	- && sp|Q7Z5L3|C1QL2_HUMAN Complement C1q-like protein 2 OS=Homo sapiens OX=9606 GN=C1QL2 PE=2 SV=2 && PF00386:C1q domain	-2.56298	0.0277374	0.273639	down
Cg16361	546.939	57.763	34.223	99.614	33.5475	40.9939	212.975	58.0518	- && - && PF00092:von Willebrand factor type A domain|PF12248:Farnesoic acid 0-methyl transferase	1.87473	0.0277437	0.273639	up
novel.1205	16.6822	18.6332	35.2924	63.8303	105.435	36.0746	23.536	68.4466	- && - && -	-1.53842	0.0277633	0.273639	down
Cg20879	52.4298	83.8495	91.9742	94.7784	277.006	162.336	76.0845	178.04	- && - && -	-1.22499	0.0277858	0.273639	down
Cg26879	47.6635	62.4213	84.4879	227.275	104.476	117.242	64.8576	149.665	- && sp|A6QNR1|RRP36_BOVIN Ribosomal RNA processing protein 36 homolog OS=Bos taurus OX=9913 GN=RRP36 PE=2 SV=1 && PF06102:rRNA biogenesis protein RRP36	-1.20496	0.02779	0.273639	down
Cg15218	131.075	82.9178	131.544	267.894	207.036	215.628	115.179	230.186	- && sp|Q6NWX7|NTM1A_DANRE N-terminal Xaa-Pro-Lys N-methyltransferase 1 OS=Danio rerio OX=7955 GN=ntmt1 PE=2 SV=1 && PF05891:AdoMet dependent proline di-methyltransferase	-1.00031	0.0277985	0.273639	down
Cg10724	0	38.1981	23.5283	0	3.83399	1.63975	20.5755	1.82458	- && sp|Q6DFJ6|TBK1_XENLA Serine/threonine-protein kinase TBK1 OS=Xenopus laevis OX=8355 GN=tbk1 PE=2 SV=1 && PF00069:Protein kinase domain	3.49952	0.027805	0.273639	up
Cg22405	34.556	54.0363	51.3344	138.299	69.0119	122.162	46.6423	109.824	- && - && -	-1.23341	0.0278096	0.273639	down
novel.5905	308.621	107.141	121.919	379.114	872.234	159.056	179.227	470.135	- && - && -	-1.39229	0.0278376	0.27377	down
Cg26120	120.35	111.799	70.5848	189.557	173.488	262.361	100.911	208.469	- && sp|Q49YE0|Y1056_STAS1 Putative universal stress protein SSP1056 OS=Staphylococcus saprophyticus subsp. saprophyticus (strain ATCC 15305 / DSM 20229 / NCIMB 8711 / NCTC 7292 / S-41) OX=342451 GN=SSP1056 PE=3 SV=1 && PF00582:Universal stress protein family	-1.04751	0.0278876	0.274118	down
Cg11192	8.34111	9.31661	1.06947	19.3425	46.9664	22.1367	6.24239	29.4819	- && sp|Q9BIW4|LIMD_DICDI LIM domain-containing protein D OS=Dictyostelium discoideum OX=44689 GN=limD PE=2 SV=1 && PF00412:LIM domain	-2.23611	0.0279635	0.274633	down
Cg29533	32.1729	12.1116	58.8207	0	13.419	0	34.3684	4.47299	- && - && -	2.95109	0.028021	0.274997	up
Cg09671	0	0	0	26.1124	0	1.63975	0	9.25072	- && - && -	-5.56783	0.0280691	1	down
novel.1584	79.8364	92.2344	71.6543	292.072	97.7669	165.615	81.2417	185.151	- && - && PF07525:SOCS box	-1.18759	0.0280991	0.2755	down
Cg14491	129.883	72.6695	143.309	58.0276	13.419	55.7517	115.287	42.3994	- && - && PF02864:STAT protein, DNA binding domain	1.44074	0.0281046	0.2755	up
Cg17639	70.3037	92.2344	68.4459	5.80276	22.0455	45.9131	76.9947	24.5871	- && sp|Q8TEK3|DOT1L_HUMAN Histone-lysine N-methyltransferase, H3 lysine-79 specific OS=Homo sapiens OX=9606 GN=DOT1L PE=1 SV=3 && PF08123:Histone methylation protein DOT1	1.64148	0.0281165	0.2755	up
Cg26041	5.95794	13.9749	12.8336	59.9618	19.17	39.3541	10.9222	39.4953	- && sp|O45782|ARD17_CAEEL Arrestin domain-containing protein 17 OS=Caenorhabditis elegans OX=6239 GN=arrd-17 PE=1 SV=2 && PF02752:Arrestin (or S-antigen), C-terminal domain|PF00339:Arrestin (or S-antigen), N-terminal domain	-1.84682	0.0281414	0.275555	down
Cg26427	1611.03	2588.15	2928.2	802.715	949.872	1807.83	2375.79	1186.81	- && sp|P46940|IQGA1_HUMAN Ras GTPase-activating-like protein IQGAP1 OS=Homo sapiens OX=9606 GN=IQGAP1 PE=1 SV=1 && PF03836:RasGAP C-terminus|PF00616:GTPase-activator protein for Ras-like GTPase|PF00612:IQ calmodulin-binding motif|PF00307:Calponin homology (CH) domain	1.00119	0.0281515	0.275555	up
Cg12224	20.257	0.931661	1.06947	0	0	0	7.41937	0	- && - && -	5.4598	0.0281549	1	up
Cg01294	0	0	0	44.4878	178.281	0	0	74.2562	- && - && -	-8.57435	0.0282259	0.275995	down
Cg30506	9.5327	14.9066	89.8353	0	0.958499	14.7578	38.0915	5.23876	- && sp|D8VNS7|FCNV1_CERRY Ryncolin-1 OS=Cerberus rynchops OX=46267 PE=1 SV=1 && PF00147:Fibrinogen beta and gamma chains, C-terminal globular domain	2.84384	0.0282879	0.276457	up
Cg10159	611.284	584.151	565.748	120.891	208.953	468.97	587.061	266.271	- && sp|Q6DN90|IQEC1_HUMAN IQ motif and SEC7 domain-containing protein 1 OS=Homo sapiens OX=9606 GN=IQSEC1 PE=1 SV=1 && PF16453:PH domain|PF01369:Sec7 domain	1.13957	0.0283942	0.277206	up
novel.7183	4.76635	4.6583	9.62521	0	0	0	6.34995	0	- && - && -	5.24121	0.0284247	1	up
Cg25065	85.7943	144.407	58.8207	190.524	278.923	167.255	96.3408	212.234	- && sp|Q66IL0|CHID1_XENTR Chitinase domain-containing protein 1 OS=Xenopus tropicalis OX=8364 GN=chid1 PE=2 SV=1 && PF00704:Glycosyl hydrolases family 18	-1.13702	0.0284348	0.277458	down
Cg13810	38.1308	8.38495	103.738	15.474	11.502	0	50.0847	8.992	- && - && -	2.48483	0.0284713	0.277477	up
Cg03384	0	0	0	17.4083	2.8755	1.63975	0	7.30784	- && - && -	-5.22706	0.0285067	1	down
Cg08591	20.257	22.3599	12.8336	58.9947	50.8004	45.9131	18.4835	51.9028	- && - && PF13649:Methyltransferase domain	-1.48774	0.0285378	0.277884	down
Cg17107	147.757	174.221	170.045	68.666	74.7629	98.3853	164.008	80.6047	- && sp|Q9U6M0|ECSIT_DROME Evolutionarily conserved signaling intermediate in Toll pathway, mitochondrial OS=Drosophila melanogaster OX=7227 GN=ECSIT PE=1 SV=2 && PF14784:C-terminal domain of the ECSIT protein|PF06239:Evolutionarily conserved signalling intermediate in Toll pathway	1.02403	0.0285843	0.278191	up
Cg29444	3.57476	3.72664	0	7.73701	31.6305	15.5777	2.4338	18.315	- && sp|F1RWC3|CUBN_PIG Cubilin OS=Sus scrofa OX=9823 GN=CUBN PE=1 SV=3 && PF00431:CUB domain	-2.90858	0.0286095	0.278292	down
Cg24017	767.382	641.914	1164.65	225.34	440.909	584.573	857.982	416.941	- && - && -	1.04061	0.0286779	0.278813	up
Cg03856	433.738	343.783	321.91	210.834	102.559	228.746	366.477	180.713	- && sp|A3KPP3|MOG1_DANRE Ran guanine nucleotide release factor OS=Danio rerio OX=7955 GN=rangrf PE=2 SV=1 && PF04603:Ran-interacting Mog1 protein	1.01916	0.028741	0.27911	up
Cg29330	7.14952	8.38495	62.0291	2.90138	3.83399	6.55902	25.8545	4.43146	- && sp|G3V928|LRP1_RAT Prolow-density lipoprotein receptor-related protein 1 OS=Rattus norvegicus OX=10116 GN=Lrp1 PE=1 SV=1 && -	2.53725	0.028746	0.27911	up
novel.1151	48.8551	40.9931	4.27787	141.2	100.642	60.6709	31.3753	100.838	- && - && -	-1.68452	0.0287532	0.27911	down
novel.1496	48.8551	18.6332	26.7367	107.351	84.3479	55.7517	31.4083	82.4835	- && - && -	-1.3982	0.0288148	0.279362	down
Cg23271	226.402	277.635	317.632	62.8632	116.937	195.131	273.889	124.977	- && sp|Q9H0F5|RNF38_HUMAN E3 ubiquitin-protein ligase RNF38 OS=Homo sapiens OX=9606 GN=RNF38 PE=1 SV=4 && PF13639:Ring finger domain	1.13052	0.0288165	0.279362	up
novel.5014	26.2149	15.8382	0	50.2906	134.19	18.0373	14.0177	67.5059	- && - && -	-2.27051	0.0288367	0.279362	down
Cg13411	147.757	257.138	221.38	32.8823	121.729	108.224	208.758	87.6118	- && sp|Q7ZUW2|HYOU1_DANRE Hypoxia up-regulated protein 1 OS=Danio rerio OX=7955 GN=hyou1 PE=2 SV=1 && PF00012:Hsp70 protein	1.25243	0.0288388	0.279362	up
Cg08003	0	0	0	5.80276	12.4605	2.45963	0	6.90762	- && - && -	-5.14629	0.0288869	1	down
Cg27104	103.668	76.3962	118.711	28.0467	28.755	63.9504	99.5917	40.2507	- && sp|Q9EQC5|SCYL1_MOUSE N-terminal kinase-like protein OS=Mus musculus OX=10090 GN=Scyl1 PE=1 SV=1 && PF07714:Protein tyrosine and serine/threonine kinase	1.30245	0.0289252	0.279616	up
Cg10638	4.76635	90.3711	31.0146	8.70414	6.70949	12.2982	42.0507	9.23726	- && - && PF00643:B-box zinc finger	2.18782	0.0289349	0.279616	up
Cg23914	250.233	58.6946	93.0437	41.5864	71.8874	36.0746	133.991	49.8495	- && sp|Q18120|TWK18_CAEEL TWiK family of potassium channels protein 18 OS=Caenorhabditis elegans OX=6239 GN=twk-18 PE=1 SV=2 && PF07885:Ion channel	1.42544	0.0289407	0.279616	up
Cg07911	56.0046	20.4965	80.2101	0	25.8795	1.63975	52.2371	9.17307	- && sp|O08863|BIRC3_MOUSE Baculoviral IAP repeat-containing protein 3 OS=Mus musculus OX=10090 GN=Birc3 PE=1 SV=2 && PF00653:Inhibitor of Apoptosis domain|PF13920:Zinc finger, C3HC4 type (RING finger)	2.51427	0.0289637	0.279616	up
Cg13830	157.29	188.195	49.1955	55.1262	2.8755	54.1119	131.56	37.3712	- && - && PF08205:CD80-like C2-set immunoglobulin domain	1.81451	0.0290031	0.279616	up
Cg14781	2.38317	5.58996	4.27787	6.76988	56.5514	9.83853	4.08367	24.3866	- && sp|G5EBR3|GLUCL_CAEEL Glutamate-gated chloride channel alpha OS=Caenorhabditis elegans OX=6239 GN=glc-1 PE=1 SV=1 && PF02932:Neurotransmitter-gated ion-channel transmembrane region|PF02931:Neurotransmitter-gated ion-channel ligand binding domain	-2.56573	0.029005	0.279616	down
Cg22184	337.219	202.17	182.879	716.641	258.795	568.175	240.756	514.537	- && - && -	-1.09653	0.0290132	0.279616	down
novel.5458	0	0	0	0	0	33.615	0	11.205	- && - && -	-5.84907	0.0290161	0.279616	down
Cg05857	320.537	172.357	151.864	78.3372	128.439	92.6461	214.92	99.8074	- && sp|Q9Y6I7|WSB1_HUMAN WD repeat and SOCS box-containing protein 1 OS=Homo sapiens OX=9606 GN=WSB1 PE=1 SV=1 && PF07525:SOCS box|PF00400:WD domain, G-beta repeat	1.10572	0.0290269	0.279616	up
novel.1075	39.3224	0	0	0.967126	0	0	13.1075	0.322375	- && - && -	5.32091	0.0290293	0.279616	up
Cg20296	46.4719	134.159	81.2795	198.261	294.259	123.801	87.3035	205.44	- && sp|B3EWZ5|MLRP1_ACRMI MAM and LDL-receptor class A domain-containing protein 1 (Fragment) OS=Acropora millepora OX=45264 PE=1 SV=1 && PF01400:Astacin (Peptidase family M12A)|PF00431:CUB domain|PF00629:MAM domain, meprin/A5/mu	-1.23095	0.029086	0.279968	down
Cg16131	0	0.931661	1.06947	12.5726	3.83399	14.7578	0.667043	10.3881	- && - && -	-3.92367	0.0290958	0.279968	down
Cg06837	39.3224	40.0614	26.7367	71.5673	99.6839	80.348	35.3735	83.8664	- && sp|Q91437|PYR1_SQUAC CAD protein OS=Squalus acanthias OX=7797 GN=CAD PE=2 SV=1 && PF01979:Amidohydrolase family|PF02142:MGS-like domain|PF00117:Glutamine amidotransferase class-I|PF02787:Carbamoyl-phosphate synthetase large chain, oligomerisation domain|PF00988:Carbamoyl-phosphate synthase small chain, CPSase domain|PF02786:Carbamoyl-phosphate synthase L chain, ATP binding domain|PF02729:Asp…	-1.24502	0.0291154	0.280013	down
Cg27843	86.9859	77.3278	71.6543	103.483	224.289	178.733	78.656	168.835	- && sp|Q02763|TIE2_HUMAN Angiopoietin-1 receptor OS=Homo sapiens OX=9606 GN=TEK PE=1 SV=2 && PF07714:Protein tyrosine and serine/threonine kinase	-1.10266	0.0291344	0.280052	down
Cg22575	171.589	144.407	114.433	40.6193	86.2649	68.0498	143.476	64.978	- && sp|Q09660|CC44_CAEEL Probable cytochrome P450 CYP44 OS=Caenorhabditis elegans OX=6239 GN=cyp-44A1 PE=3 SV=2 && PF00067:Cytochrome P450	1.14203	0.0293882	0.282202	up
Cg26432	220.444	115.526	336.882	85.1071	115.02	105.764	224.284	101.964	- && sp|Q7ZVK3|SIR2_DANRE NAD-dependent protein deacetylase sirtuin-2 OS=Danio rerio OX=7955 GN=sirt2 PE=1 SV=1 && PF02146:Sir2 family	1.13639	0.0294431	0.282584	up
Cg30170	94.1354	29.8131	57.7512	92.8441	316.305	86.0871	60.5666	165.079	- && - && -	-1.44935	0.0294584	0.282587	down
Cg15703	22.6402	32.6081	41.7092	75.4359	111.186	57.3914	32.3192	81.3377	- && sp|Q7ZYF1|DJ27A_XENLA DnaJ homolog subfamily C member 27-A OS=Xenopus laevis OX=8355 GN=dnajc27-a PE=1 SV=1 && PF00071:Ras family	-1.32863	0.0294883	0.282608	down
Cg13315	9.5327	13.9749	0	0	0	0	7.83587	0	- && sp|E9Q236|MRP4_MOUSE ATP-binding cassette sub-family C member 4 OS=Mus musculus OX=10090 GN=Abcc4 PE=1 SV=1 && PF00664:ABC transporter transmembrane region	5.54605	0.029518	1	up
Cg29409	3.57476	19.5649	2.13893	11.6055	33.5475	77.8883	8.42619	41.0138	- && - && -	-2.26815	0.0295338	0.282608	down
Cg10533	48.8551	49.378	8.55574	146.036	88.1819	73.789	35.5963	102.669	- && sp|Q1JP73|QSPP_BOVIN Queuosine salvage protein OS=Bos taurus OX=9913 PE=2 SV=1 && PF10343:Potential Queuosine, Q, salvage protein family	-1.52729	0.0295418	0.282608	down
Cg20946	15.4906	10.2483	17.1115	27.0795	79.5554	32.7951	14.2835	46.4767	- && - && -	-1.70481	0.029542	0.282608	down
Cg26688	48.8551	85.7128	84.4879	105.417	335.475	104.124	73.0186	181.672	- && sp|Q9D2J7|ANKE1_MOUSE Ankyrin repeat and EF-hand domain-containing protein 1 OS=Mus musculus OX=10090 GN=Ankef1 PE=2 SV=1 && PF12796:Ankyrin repeats (3 copies)|PF13499:EF-hand domain pair	-1.31285	0.0295807	0.282608	down
Cg29050	5.95794	2.79498	3.2084	71.5673	0	19.6771	3.98711	30.4148	- && - && -	-2.93913	0.0295814	0.282608	down
novel.6453	30.9813	0	0	0	0	0	10.3271	0	- && - && -	5.93893	0.0296263	1	up
Cg13404	333.644	307.448	604.249	66.7317	213.745	257.441	415.114	179.306	- && sp|Q8AVC3|G6PT3_XENLA Glucose-6-phosphate exchanger SLC37A2 OS=Xenopus laevis OX=8355 GN=slc37a2 PE=2 SV=1 && PF07690:Major Facilitator Superfamily	1.21023	0.0296979	0.283534	up
Cg16026	98.9017	43.788	48.126	76.403	51.7589	472.249	63.6053	200.137	- && - && PF17517:IgGFc binding protein	-1.65687	0.0297279	0.283571	down
Cg26421	0	16.7699	0	14.5069	100.642	13.9379	5.58996	43.0291	- && - && -	-2.91932	0.0297428	0.283571	down
Cg22909	56.0046	119.253	141.17	171.181	370.939	178.733	105.476	240.285	- && - && PF14945:Normal lung function maintenance, Low in Lung Cancer 1 protein	-1.18595	0.0297666	0.283654	down
Cg18216	23.8317	31.6765	32.084	83.1729	36.423	114.783	29.1974	78.1262	- && sp|Q9Y547|IFT25_HUMAN Intraflagellar transport protein 25 homolog OS=Homo sapiens OX=9606 GN=HSPB11 PE=1 SV=1 && PF00754:F5/8 type C domain	-1.41957	0.0298449	0.28415	down
Cg05722	35.7476	62.4213	62.0291	193.425	69.0119	123.801	53.3993	128.746	- && sp|Q5XLR4|BORE1_DANRE Borealin OS=Danio rerio OX=7955 GN=cdca8 PE=2 SV=2 && PF10512:Cell division cycle-associated protein 8	-1.26722	0.0298642	0.28415	down
Cg14221	45.2803	29.8131	86.6269	64.7975	283.716	98.3853	53.9068	148.966	- && sp|Q96MM6|HS12B_HUMAN Heat shock 70 kDa protein 12B OS=Homo sapiens OX=9606 GN=HSPA12B PE=1 SV=2 && PF00012:Hsp70 protein	-1.46716	0.0299197	0.28441	down
Cg06755	63.1541	40.0614	16.042	86.0742	157.194	74.6088	39.7525	105.959	- && - && -	-1.41648	0.0299326	0.28441	down
Cg26691	318.154	298.131	208.546	63.8303	138.982	179.553	274.944	127.455	- && sp|Q8WUB8|PHF10_HUMAN PHD finger protein 10 OS=Homo sapiens OX=9606 GN=PHF10 PE=1 SV=3 && PF00628:PHD-finger	1.10786	0.0299394	0.28441	up
Cg17698	28.5981	98.756	50.265	49.3234	421.739	89.3666	59.2064	186.81	- && - && -	-1.65438	0.0299523	0.28441	down
Cg15786	3.57476	36.3348	9.62521	0	0	4.09939	16.5116	1.36646	- && sp|Q13191|CBLB_HUMAN E3 ubiquitin-protein ligase CBL-B OS=Homo sapiens OX=9606 GN=CBLB PE=1 SV=2 && PF02262:CBL proto-oncogene N-terminal domain 1	3.55575	0.0299872	0.284579	up
Cg05272	81.0279	53.1047	68.4459	24.1782	25.8795	31.1553	67.5262	27.071	- && sp|Q86YT5|S13A5_HUMAN Solute carrier family 13 member 5 OS=Homo sapiens OX=9606 GN=SLC13A5 PE=1 SV=1 && PF00939:Sodium:sulfate symporter transmembrane region	1.31577	0.0300148	0.284579	up
Cg01914	2.38317	7.45328	20.3199	58.9947	11.502	59.0312	10.0521	43.176	- && - && -	-2.0999	0.0300156	0.284579	down
Cg06903	15.4906	3.72664	1.06947	0	0	0	6.76225	0	- && - && -	5.32756	0.030033	1	up
Cg27087	13.1075	10.2483	0	0	0	0	7.78524	0	- && - && PF00643:B-box zinc finger	5.53471	0.0300493	1	up
Cg17917	41.7056	44.7197	22.4588	113.154	68.0534	84.4474	36.2947	88.5515	- && sp|Q9NQM4|DAAF6_HUMAN Dynein axonemal assembly factor 6 OS=Homo sapiens OX=9606 GN=DNAAF6 PE=1 SV=1 && PF18201:PIH1 CS-like domain	-1.28583	0.0300535	0.284695	down
novel.3169	0	0.931661	0	12.5726	7.66799	4.91926	0.310554	8.38663	- && - && -	-4.46473	0.0300605	1	down
novel.6340	0	3.72664	4.27787	14.5069	19.17	20.4969	2.66817	18.0579	- && - && -	-2.736	0.0300651	0.284695	down
Cg18894	103.668	125.774	125.128	368.475	175.405	191.851	118.19	245.244	- && sp|O18023|IGDB2_CAEEL Ig-like and fibronectin type-III domain-containing protein 2 OS=Caenorhabditis elegans OX=6239 GN=igdb-2 PE=1 SV=4 && PF01682:DB module|PF00041:Fibronectin type III domain	-1.05214	0.0300736	0.284695	down
Cg19124	33.3644	21.4282	26.7367	61.8961	73.8044	66.4101	27.1764	67.3702	- && - && -	-1.31336	0.0302317	0.286047	down
Cg28935	98.9017	20.4965	25.6672	18.3754	14.3775	6.55902	48.3552	13.104	- && sp|A7MB54|HLX_BOVIN H2.0-like homeobox protein OS=Bos taurus OX=9913 GN=HLX PE=2 SV=1 && PF00046:Homeodomain	1.88444	0.0302618	0.286188	up
Cg06788	91.7522	216.145	116.572	16.4411	43.1324	94.2859	141.49	51.2865	- && sp|P32865|GPRK1_DROME G protein-coupled receptor kinase 1 OS=Drosophila melanogaster OX=7227 GN=Gprk1 PE=2 SV=2 && PF00615:Regulator of G protein signaling domain|PF00069:Protein kinase domain	1.46183	0.0302975	0.286381	up
Cg08689	108.434	222.667	168.976	89.9427	49.8419	87.7269	166.692	75.8372	- && sp|Q8BMF3|MAON_MOUSE NADP-dependent malic enzyme, mitochondrial OS=Mus musculus OX=10090 GN=Me3 PE=1 SV=2 && PF03949:Malic enzyme, NAD binding domain|PF00390:Malic enzyme, N-terminal domain	1.13688	0.0303323	0.286455	up
Cg02898	4.76635	0	103.738	0	0	0.819877	36.1682	0.273292	- && sp|Q9IBD8|PTPRC_CYPCA Receptor-type tyrosine-protein phosphatase C OS=Cyprinus carpio OX=7962 GN=ptprc PE=2 SV=1 && PF00102:Protein-tyrosine phosphatase	6.78936	0.0303359	0.286455	up
Cg29204	96.5186	99.6877	232.074	31.9152	71.8874	71.3293	142.76	58.3773	- && sp|Q96ME1|FXL18_HUMAN F-box/LRR-repeat protein 18 OS=Homo sapiens OX=9606 GN=FBXL18 PE=1 SV=2 && PF12937:F-box-like	1.28898	0.0303703	0.286597	up
Cg28902	0	0	0	0	131.314	74.6088	0	68.6411	- && - && -	-8.46101	0.0303816	0.286597	down
Cg21656	212.103	428.564	203.199	33.8494	106.393	191.851	281.288	110.698	- && sp|Q0VCK5|AP2A2_BOVIN AP-2 complex subunit alpha-2 OS=Bos taurus OX=9913 GN=AP2A2 PE=1 SV=1 && PF02883:Adaptin C-terminal domain|PF01602:Adaptin N terminal region	1.34438	0.0304137	0.286756	up
Cg07867	0	28.8815	94.1131	0	0	1.63975	40.9982	0.546585	- && - && -	6.19251	0.0304397	0.286808	up
Cg04323	330.07	659.616	427.787	79.3044	281.799	265.64	472.491	208.914	- && sp|Q7PPA5|ATC1_ANOGA Calcium-transporting ATPase sarcoplasmic/endoplasmic reticulum type OS=Anopheles gambiae OX=7165 GN=SERCA PE=3 SV=5 && PF00122:E1-E2 ATPase|PF00690:Cation transporter/ATPase, N-terminus|PF13246:Cation transport ATPase (P-type)|PF00689:Cation transporting ATPase, C-terminus|PF12710:haloacid dehalogenase-like hydrolase	1.17735	0.0304652	0.286808	up
Cg04583	63.1541	126.706	104.808	147.003	344.101	167.255	98.2226	219.453	- && sp|Q9H0C1|ZMY12_HUMAN Zinc finger MYND domain-containing protein 12 OS=Homo sapiens OX=9606 GN=ZMYND12 PE=1 SV=3 && PF17874:MalT-like TPR region|PF01753:MYND finger	-1.15751	0.0304943	0.286887	down
Cg05447	29.7897	32.6081	22.4588	67.6988	80.5139	60.6709	28.2855	69.6279	- && - && PF12260:Protein-kinase domain of FAM69|PF14875:N-term cysteine-rich ER, FAM69	-1.29817	0.0305196	0.286887	down
Cg22757	33.3644	14.9066	121.919	25.1453	6.70949	12.2982	56.7301	14.7176	- && sp|Q13003|GRIK3_HUMAN Glutamate receptor ionotropic, kainate 3 OS=Homo sapiens OX=9606 GN=GRIK3 PE=2 SV=3 && PF00497:Bacterial extracellular solute-binding proteins, family 3|PF00060:Ligand-gated ion channel	1.94735	0.0305383	0.286919	up
Cg02655	208.528	68.9429	139.031	43.5207	64.2194	68.0498	138.834	58.5966	- && sp|Q5RLM2|S22A7_RAT Solute carrier family 22 member 7 OS=Rattus norvegicus OX=10116 GN=Slc22a7 PE=1 SV=1 && PF00001:7 transmembrane receptor (rhodopsin family)|PF00083:Sugar (and other) transporter	1.24169	0.0305633	0.286986	up
Cg30256	54.813	97.8244	144.378	16.4411	28.755	62.3107	99.0052	35.8356	- && sp|Q6TLK4|RHG27_RAT Rho GTPase-activating protein 27 OS=Rattus norvegicus OX=10116 GN=Arhgap27 PE=1 SV=1 && PF00169:PH domain|PF00620:RhoGAP domain	1.46264	0.0305933	0.286986	up
Cg06304	840.069	605.579	1902.58	596.717	423.656	580.473	1116.08	533.616	- && - && PF04749:PLAC8 family	1.06442	0.0306138	0.286986	up
Cg18415	7.14952	35.4031	22.4588	22.2439	145.692	58.2113	21.6705	75.3823	- && sp|A4II40|F166C_XENTR Protein FAM166C OS=Xenopus tropicalis OX=8364 GN=fam166c PE=2 SV=1 && PF10629:Protein of unknown function (DUF2475)	-1.79089	0.0306221	0.286986	down
Cg25131	17.8738	68.9429	39.5703	97.6798	116.937	104.944	42.129	106.52	- && sp|Q3MIF4|XYLB_RAT Xylulose kinase OS=Rattus norvegicus OX=10116 GN=Xylb PE=2 SV=1 && PF02782:FGGY family of carbohydrate kinases, C-terminal domain|PF00370:FGGY family of carbohydrate kinases, N-terminal domain	-1.33186	0.0306477	0.287083	down
Cg17790	39.3224	30.7448	75.9322	169.247	102.559	83.6275	48.6665	118.478	- && sp|A7M7B9|NTH_CHICK Endonuclease III-like protein 1 OS=Gallus gallus OX=9031 GN=NTHL1 PE=2 SV=1 && PF00730:HhH-GPD superfamily base excision DNA repair protein|PF00633:Helix-hairpin-helix motif	-1.28395	0.0306638	0.28709	down
novel.7221	3.57476	4.6583	0	3.86851	46.9664	13.118	2.74435	21.3177	- && - && -	-2.94935	0.0307261	0.287529	down
Cg14612	194.229	8507.92	4289.63	15834.8	11569.1	13763.3	4330.6	13722.4	- && sp|Q8ITC3|RS19_ARGIR 40S ribosomal protein S19 OS=Argopecten irradians OX=31199 GN=RPS19 PE=2 SV=1 && PF01090:Ribosomal protein S19e	-1.66383	0.0307651	0.287751	down
Cg19554	7.14952	13.9749	1.06947	83.1729	2.8755	37.7144	7.39797	41.2542	- && sp|Q9PTK2|FOXE4_XENLA Forkhead box protein E4 OS=Xenopus laevis OX=8355 GN=foxe4 PE=2 SV=1 && PF00250:Forkhead domain	-2.47081	0.0308118	0.287864	down
Cg09997	53.6214	2.79498	20.3199	0	2.8755	7.3789	25.5788	3.41813	- && - && -	2.88261	0.0308355	0.287864	up
Cg01677	0	0	0	156.674	0	45.9131	0	67.5292	- && - && -	-8.4374	0.0308481	0.287864	down
Cg18331	84.6027	216.145	128.336	384.916	253.044	265.64	143.028	301.2	- && - && PF13855:Leucine rich repeat	-1.07201	0.0308677	0.287864	down
Cg28438	442.079	891.599	484.469	147.97	244.417	446.013	606.049	279.467	- && sp|Q8LGG8|USPAL_ARATH Universal stress protein A-like protein OS=Arabidopsis thaliana OX=3702 GN=At3g01520 PE=1 SV=2 && PF00582:Universal stress protein family	1.11639	0.0308695	0.287864	up
Cg19705	145.374	291.61	162.559	55.1262	139.941	67.2299	199.847	87.4323	- && sp|Q6NRT5|CSN1_XENLA COP9 signalosome complex subunit 1 OS=Xenopus laevis OX=8355 GN=csn1 PE=2 SV=1 && PF10602:26S proteasome subunit RPN7|PF01399:PCI domain	1.19444	0.0309083	0.288083	up
Cg22309	179.93	335.398	294.104	341.396	1101.32	374.684	269.81	605.798	- && sp|Q5JVL4|EFHC1_HUMAN EF-hand domain-containing protein 1 OS=Homo sapiens OX=9606 GN=EFHC1 PE=1 SV=1 && PF06565:DUF1126 PH-like domain	-1.16608	0.0309929	0.288518	down
Cg11774	0	0	0	0	0	32.7951	0	10.9317	- && - && -	-5.81347	0.0310013	0.288518	down
Cg06764	151.332	228.257	137.961	72.5345	96.8084	82.8076	172.517	84.0502	- && sp|Q96GA7|SDSL_HUMAN Serine dehydratase-like OS=Homo sapiens OX=9606 GN=SDSL PE=1 SV=1 && PF00291:Pyridoxal-phosphate dependent enzyme	1.03845	0.0310506	0.288834	up
[truncated: 495 more rows]

## Sheet: 48h
gene_id	V_48h_2N_1	V_48h_2N_2	V_48h_2N_3	P_48h_2N_1	P_48h_2N_2	P_48h_2N_3	V_48h_2N	P_48h_2N	gene_description	log2FoldChange	pvalue	pvalue	expression trend
Cg30483	6118.97	1235.63	955.815	0	0	0	2770.14	0	- && - && -	14.0684	1.98688e-20	1.98688e-20	up
Cg20699	103.873	98.8502	103.252	0	0	0	101.992	0	- && - && -	9.30508	3.64303e-11	3.64303e-11	up
novel.1725	415.493	196.602	32.4505	0	0	0	214.848	0	- && - && -	10.3794	8.29484e-11	8.29484e-11	up
Cg01363	0	0	1.9667	1848.56	1275.15	6.1272	0.655566	1043.28	- && - && -	-10.5607	1.42217e-09	1.42217e-09	down
Cg11272	408.329	14.2784	127.835	0	0.713169	0	183.481	0.237723	- && - && -	9.19005	3.3498e-08	3.3498e-08	up
Cg29703	599.36	21.9667	362.856	0	4.27902	0	328.061	1.42634	- && - && -	7.7503	3.6946e-08	3.6946e-08	up
Cg27259	679.355	30.7534	91.4515	0	3.56585	0	267.186	1.18862	- && - && -	7.70837	1.26367e-07	1.26367e-07	up
Cg01294	4.77578	0	0	688.933	183.998	19.4028	1.59193	297.445	- && - && -	-7.59543	3.03361e-07	3.03361e-07	down
novel.3585	0	2.19667	0	214.54	42.7902	51.06	0.732224	102.797	- && - && -	-7.14245	8.29091e-07	8.29091e-07	down
novel.3692	0	0	0	174.776	14.9766	26.5512	0	72.1014	- && - && -	-8.49174	1.04114e-06	1.04114e-06	down
Cg02466	0	1.09834	0	28.667	68.4642	56.166	0.366112	51.0991	- && - && PF12796:Ankyrin repeats (3 copies)|PF13637:Ankyrin repeats (many copies)	-7.03475	2.9258e-06	2.9258e-06	down
novel.4140	38.2062	628.248	3.9334	0	2.13951	2.0424	223.463	1.39397	- && - && -	7.31226	3.36423e-06	3.36423e-06	up
Cg01272	19.1031	216.372	60.9676	0	0	3.0636	98.8143	1.0212	- && - && PF16064:Domain of unknown function (DUF4806)	6.70284	4.09303e-06	4.09303e-06	up
Cg08665	222.074	3.29501	56.0509	0	0.713169	0	93.8065	0.237723	- && sp|Q91Y77|MOT10_RAT Monocarboxylate transporter 10 OS=Rattus norvegicus OX=10116 GN=Slc16a10 PE=1 SV=1 && PF07690:Major Facilitator Superfamily	8.2219	4.60593e-06	4.60593e-06	up
Cg30607	5.96972	84.5719	38.3506	0	0	0	42.9641	0	- && - && -	8.05842	6.30173e-06	6.30173e-06	up
Cg01622	10.7455	34.0484	7.86679	404.112	288.834	84.7597	17.5536	259.235	- && - && PF00059:Lectin C-type domain	-3.88605	7.84207e-06	7.84207e-06	down
novel.118	33.4305	5.49168	185.853	0	0.713169	0	74.925	0.237723	- && - && -	7.89947	8.31599e-06	8.31599e-06	up
Cg10573	0	0	6.88344	106.345	99.8437	70.4629	2.29448	92.2173	- && sp|Q9BWT3|PAPOG_HUMAN Poly(A) polymerase gamma OS=Homo sapiens OX=9606 GN=PAPOLG PE=1 SV=2 && PF04928:Poly(A) polymerase central domain|PF04926:Poly(A) polymerase predicted RNA binding domain	-5.27684	1.01524e-05	1.01524e-05	down
Cg29854	414.299	216.372	244.854	0	2.13951	23.4876	291.842	8.54237	- && - && PF06140:Interferon-induced 6-16 family	5.1123	1.27336e-05	1.27336e-05	up
Cg29205	5.96972	15.3767	10.8168	86.001	88.433	93.9505	10.7211	89.4615	- && sp|Q9U221|UNG_CAEEL Uracil-DNA glycosylase OS=Caenorhabditis elegans OX=6239 GN=ung-1 PE=1 SV=1 && PF03167:Uracil DNA glycosylase superfamily	-3.05597	1.31455e-05	1.31455e-05	down
[truncated: 1,145 more rows]
