# Supplementary material for: Transcriptome profiling combined with network analysis deepens the understanding of immune response mechanisms in blood of pacific oyster Crassostrea gigas infected by Vibrio alginolyticus
Source: Frontiers journal article supplement (doi:10.3389/fmars.2022.1017445), 2022-09-16
Supplement: Data_Sheet_2.XLSX [file Data_Sheet_2.XLSX]

## Sheet: Sheet1
geneID	B_0h_2N	P_12h_2N	V_12h_2N	P_48h_2N	V_48h_2N	gene_description
Cg00022	1.5512	2.53988	0.783693	1.61936	1.28047	- && - && -
Cg00048	4.96768	11.9405	2.75026	3.69121	6.65229	- && - && -
Cg00064	4.89429	3.43095	16.5637	7.206	10.6096	- && - && -
Cg00065	0.231898	0.100921	0.13698	0.0106853	0.232164	- && sp|P40199|CEAM6_HUMAN Carcinoembryonic antigen-related cell adhesion molecule 6 OS=Homo sapiens OX=9606 GN=CEACAM6 PE=1 SV=3 && -
Cg00066	0.744368	0.192918	0.842258	0.574414	1.08646	- && - && -
Cg00085	0.0367656	0.088011	0.167196	0	0.270757	- && - && -
Cg00131	16.207	0.588176	18.1169	5.58407	4.17731	- && sp|Q7SYH5|SC5A8_XENLA Sodium-coupled monocarboxylate transporter 1 OS=Xenopus laevis OX=8355 GN=slc5a8 PE=2 SV=1 && PF00474:Sodium:solute symporter family
Cg00144	0.448775	1.02438	0.299214	0.0586517	0.955696	- && - && -
Cg00165	0.388428	0.290383	1.9112	0.590374	0.565496	- && sp|Q99M80|PTPRT_MOUSE Receptor-type tyrosine-protein phosphatase T OS=Mus musculus OX=10090 GN=Ptprt PE=1 SV=2 && PF00102:Protein-tyrosine phosphatase
Cg00170	0.674386	1.55691	0.346253	0.111675	0.698007	- && - && -
Cg00192	27.2882	27.8605	60.5012	13.1633	7.56198	- && sp|Q4W946|ENCD_ASPFU 2-oxoglutarate-Fe(II) type oxidoreductase OS=Neosartorya fumigata (strain ATCC MYA-4609 / Af293 / CBS 101355 / FGSC A1100) OX=330879 GN=encD PE=1 SV=2 && PF14226:non-haem dioxygenase in morphine synthesis N-terminal|PF03171:2OG-Fe(II) oxygenase superfamily
Cg00193	5.83513	1.50505	5.2905	5.4298	3.86833	- && - && PF00209:Sodium:neurotransmitter symporter family
Cg00203	0.475657	0.107664	1.58393	0.70466	0.525571	- && - && PF00059:Lectin C-type domain
Cg00222	4.24573	0.569763	0.50974	7.41349	2.06063	- && - && PF00059:Lectin C-type domain
Cg00226	1.33118	7.4043	1.83483	2.95861	3.47263	- && - && -
Cg00229	2.52405	1.00381	2.64915	1.68334	2.03147	- && sp|P23467|PTPRB_HUMAN Receptor-type tyrosine-protein phosphatase beta OS=Homo sapiens OX=9606 GN=PTPRB PE=1 SV=3 && PF00102:Protein-tyrosine phosphatase
Cg00230	0.328251	0.159191	0.694972	0	0.834381	- && - && -
Cg00247	2.86535	1.35731	4.88825	0.73971	1.69388	- && sp|Q9Y289|SC5A6_HUMAN Sodium-dependent multivitamin transporter OS=Homo sapiens OX=9606 GN=SLC5A6 PE=1 SV=2 && PF00474:Sodium:solute symporter family
Cg00248	0.962197	2.87598	0.360254	0.843047	0.407332	- && - && -
Cg00259	8.72345	9.53414	3.63066	0.277924	2.59178	- && sp|P06797|CATL1_MOUSE Procathepsin L OS=Mus musculus OX=10090 GN=Ctsl PE=1 SV=2 && PF08246:Cathepsin propeptide inhibitor domain (I29)|PF00112:Papain family cysteine protease
Cg00263	2.56872	0.761401	2.25114	1.40503	2.86011	- && sp|V5NAL9|TLR4_PINIB Toll-like receptor 4 OS=Pinctada imbricata OX=66713 PE=2 SV=1 && PF13855:Leucine rich repeat|PF01582:TIR domain
Cg00271	194.475	164.539	347.788	271.467	270.008	- && - && -
Cg00306	39.4821	13.0686	102.863	3.70594	10.1974	- && - && -
Cg00368	7.14302	7.11884	5.84521	0.256432	2.60413	- && - && -
Cg00373	2.88414	0.959147	2.62385	1.84408	2.10857	- && - && PF13639:Ring finger domain
Cg00392	0.64302	0	0.0856737	1.73035	0.12011	- && - && -
Cg00499	0	0.0101084	0.196301	0.114996	0.0201048	- && sp|Q071E0|KT5AA_DANRE N-lysine methyltransferase KMT5A-A OS=Danio rerio OX=7955 GN=kmt5aa PE=2 SV=1 && -
Cg00532	1.77165	0	1.29342	0.0466028	0.490302	- && - && -
Cg00550	0.675629	2.28248	0.153084	0.773295	1.93062	- && - && -
Cg00646	0.250529	0.389879	0.151086	0.0235958	0.368299	- && sp|A8WK63|RECQ1_CAEBR Putative ATP-dependent DNA helicase Q1 OS=Caenorhabditis briggsae OX=6238 GN=CBG24191 PE=3 SV=1 && PF00270:DEAD/DEAH box helicase|PF00271:Helicase conserved C-terminal domain
Cg00752	1.95135	1.40915	0	1.04494	0.625408	- && - && PF13960:Domain of unknown function (DUF4218)
Cg00756	0.00413868	0.104473	0.0049564	0.252837	0.0793264	- && - && PF18701:Family of unknown function (DUF5641)|PF05380:Pao retrotransposon peptidase
Cg00771	0	0.584389	0	0	0.0645101	- && - && -
Cg00802	0.0643624	0	0.121636	0.267706	0.521697	- && sp|Q04786|HEX_VIBVL Beta-hexosaminidase OS=Vibrio vulnificus OX=672 GN=hex PE=3 SV=1 && PF03174:Chitobiase/beta-hexosaminidase C-terminal domain|PF03173:Putative carbohydrate binding domain|PF02838:Glycosyl hydrolase family 20, domain 2|PF00728:Glycosyl hydrolase family 20, catalytic domain
Cg00807	3.64158	2.30487	0	0.603145	1.25787	- && - && PF12012:Domain of unknown function (DUF3504)
Cg00928	0.217919	0	0.524074	0.0212019	0.0338821	- && - && PF16489:GPCR-Autoproteolysis INducing (GAIN) domain
Cg00959	1.51488	0.31576	1.49174	0.680484	1.00828	- && sp|O14522|PTPRT_HUMAN Receptor-type tyrosine-protein phosphatase T OS=Homo sapiens OX=9606 GN=PTPRT PE=1 SV=6 && PF00102:Protein-tyrosine phosphatase
Cg00973	0.15443	0.830515	0.10509	0	0.214333	- && - && -
Cg00980	2.96296	1.07015	3.78287	2.50466	4.44641	- && sp|P18433|PTPRA_HUMAN Receptor-type tyrosine-protein phosphatase alpha OS=Homo sapiens OX=9606 GN=PTPRA PE=1 SV=3 && PF00102:Protein-tyrosine phosphatase
Cg00985	42.1894	27.2447	189.207	61	87.6223	- && sp|Q5EB39|KLH40_XENTR Kelch-like protein 40 OS=Xenopus tropicalis OX=8364 GN=klhl40 PE=2 SV=1 && PF01344:Kelch motif|PF07707:BTB And C-terminal Kelch|PF00651:BTB/POZ domain
Cg00991	2.79279	4.37505	1.72745	0.834779	5.06242	- && - && -
Cg01018	24.4971	10.8189	24.8112	13.698	13.2038	- && sp|Q6NWZ9|CDO1_DANRE Cysteine dioxygenase type 1 OS=Danio rerio OX=7955 GN=cdo1 PE=2 SV=1 && PF05995:Cysteine dioxygenase type I
Cg01035	2.4367	0.655877	2.26083	3.0878	1.98707	- && - && -
Cg01058	0.0811635	0	0.0763294	0.00345614	0.0589051	- && - && -
Cg01070	0.133285	0	0	2.15733	0	- && - && -
Cg01087	1.21829	0.133508	1.03452	0.766978	0.6835	- && - && -
Cg01090	15.0468	1.55218	7.5319	4.61548	4.27063	- && - && -
Cg01091	4.90755	0.64781	1.23495	5.30857	0.0891638	- && - && -
Cg01092	10.9486	6.06869	18.5392	13.9354	7.2419	- && - && -
Cg01100	10.2002	3.82409	24.8539	8.30429	22.4699	- && - && -
Cg01105	10.2512	7.05162	28.6302	11.8843	26.1665	- && - && -
Cg01110	0.727464	0.0538199	0.713359	0.0132201	1.44944	- && - && -
Cg01112	2.31856	0.926608	3.9854	0.827283	3.28514	- && - && -
Cg01122	0.0291047	1.4768	0.00711917	0.0230756	0	- && sp|P42664|UVS2_XENLA Embryonic protein UVS.2 OS=Xenopus laevis OX=8355 PE=2 SV=2 && PF00629:MAM domain, meprin/A5/mu|PF00008:EGF-like domain|PF01400:Astacin (Peptidase family M12A)
Cg01128	0.185039	0.0677583	0.221599	2.20369	0	- && - && PF05050:Methyltransferase FkbM domain
Cg01139	9.83277	5.084	10.0364	9.30077	9.05641	- && sp|P70182|PI51A_MOUSE Phosphatidylinositol 4-phosphate 5-kinase type-1 alpha OS=Mus musculus OX=10090 GN=Pip5k1a PE=1 SV=2 && PF01504:Phosphatidylinositol-4-phosphate 5-Kinase
Cg01159	5.15704	1.54265	4.19391	5.32763	7.1726	- && sp|O14522|PTPRT_HUMAN Receptor-type tyrosine-protein phosphatase T OS=Homo sapiens OX=9606 GN=PTPRT PE=1 SV=6 && PF00102:Protein-tyrosine phosphatase
Cg01174	38.0872	22.6332	45.3071	54.907	39.9927	- && - && PF03318:Clostridium epsilon toxin ETX/Bacillus mosquitocidal toxin MTX2
Cg01177	0	0	0	0.0555724	2.76368	- && - && -
Cg01179	7.52561	2.07962	6.42121	3.17126	5.96627	- && sp|Q28C98|MESH1_XENTR Guanosine-3',5'-bis(diphosphate) 3'-pyrophosphohydrolase MESH1 OS=Xenopus tropicalis OX=8364 GN=hddc3 PE=2 SV=1 && PF13328:HD domain
Cg01188	0.11217	0.447519	0.622164	0.0953144	0.877224	- && sp|Q504N0|CBPA2_MOUSE Carboxypeptidase A2 OS=Mus musculus OX=10090 GN=Cpa2 PE=1 SV=1 && PF00246:Zinc carboxypeptidase|PF02244:Carboxypeptidase activation peptide
Cg01201	0.355427	0.0813711	0.209329	1.1465	0.0456279	- && sp|Q28557|CRHBP_SHEEP Corticotropin-releasing factor-binding protein OS=Ovis aries OX=9940 GN=CRHBP PE=2 SV=1 && PF05428:Corticotropin-releasing factor binding protein (CRF-BP)
Cg01202	0.148805	0.406847	0.049943	0.039099	0.13992	- && sp|Q04786|HEX_VIBVL Beta-hexosaminidase OS=Vibrio vulnificus OX=672 GN=hex PE=3 SV=1 && PF00728:Glycosyl hydrolase family 20, catalytic domain|PF02838:Glycosyl hydrolase family 20, domain 2|PF03173:Putative carbohydrate binding domain|PF03174:Chitobiase/beta-hexosaminidase C-terminal domain
Cg01212	0.233194	2.24479	0.840971	31.5865	2.57922	- && - && PF07707:BTB And C-terminal Kelch
Cg01239	1.94767	2.20856	0.244262	1.09087	0.686564	- && sp|Q80U87|UBP8_MOUSE Ubiquitin carboxyl-terminal hydrolase 8 OS=Mus musculus OX=10090 GN=Usp8 PE=1 SV=2 && PF08969:USP8 dimerisation domain|PF13920:Zinc finger, C3HC4 type (RING finger)
Cg01241	2.10235	1.77744	1.58271	0.206315	1.56278	- && sp|P38993|FET3_YEAST Iron transport multicopper oxidase FET3 OS=Saccharomyces cerevisiae (strain ATCC 204508 / S288c) OX=559292 GN=FET3 PE=1 SV=2 && PF00394:Multicopper oxidase|PF07732:Multicopper oxidase|PF07731:Multicopper oxidase
Cg01248	0	0.114845	0.0407591	0.518235	0	- && - && PF00643:B-box zinc finger
Cg01252	0	4.46607	1.68247	2.9505	19.8793	- && - && -
Cg01253	0	0	0.105603	0	0.319798	- && sp|P05712|RAB2A_RAT Ras-related protein Rab-2A OS=Rattus norvegicus OX=10116 GN=Rab2a PE=2 SV=1 && PF00071:Ras family
Cg01259	13.2641	0.369074	7.3817	0.522888	1.47317	- && - && -
Cg01272	2.4909	1.56605	1.08432	0.0678914	6.5179	- && - && PF16064:Domain of unknown function (DUF4806)
Cg01273	0.279982	0.0417227	0	0.756974	0.0062891	- && - && -
Cg01290	2.6824	1.36669	0.906059	7.95615	0	- && - && -
Cg01291	0.16204	1.32582	0	2.59131	0	- && - && -
Cg01294	1.86337	4.02138	0	13.9388	0.0709871	- && - && -
Cg01318	0.49932	0.234118	0.367489	0.603503	0.0127067	- && sp|P38993|FET3_YEAST Iron transport multicopper oxidase FET3 OS=Saccharomyces cerevisiae (strain ATCC 204508 / S288c) OX=559292 GN=FET3 PE=1 SV=2 && PF00394:Multicopper oxidase|PF07732:Multicopper oxidase|PF07731:Multicopper oxidase
Cg01320	7.74811	14.3872	6.99369	7.59892	9.19741	- && sp|P84022|SMAD3_HUMAN Mothers against decapentaplegic homolog 3 OS=Homo sapiens OX=9606 GN=SMAD3 PE=1 SV=1 && PF03166:MH2 domain|PF03165:MH1 domain
Cg01336	1.07692	0	0.751437	0.407727	0.690973	- && - && -
Cg01363	340.582	0.512938	15.2842	100.566	0.0605145	- && - && -
Cg01450	1.00255	12.7701	0.386125	4.87439	3.45856	- && - && -
Cg01471	0.256821	0.202165	0.247189	0.119453	0.904324	- && sp|O14522|PTPRT_HUMAN Receptor-type tyrosine-protein phosphatase T OS=Homo sapiens OX=9606 GN=PTPRT PE=1 SV=6 && PF00754:F5/8 type C domain|PF00102:Protein-tyrosine phosphatase
Cg01481	8.42005	13.5616	18.5984	2.08148	9.03244	- && - && PF00008:EGF-like domain
Cg01487	57.3667	2.08219	95.0243	46.3316	27.0972	- && - && -
Cg01502	0.755406	0.0307332	0.34891	0.593151	0.26672	- && sp|Q9QXM0|ABHD2_MOUSE Monoacylglycerol lipase ABHD2 OS=Mus musculus OX=10090 GN=Abhd2 PE=1 SV=1 && PF00561:alpha/beta hydrolase fold
Cg01516	1.92105	0.136879	1.88766	2.7086	0.785417	- && - && PF00643:B-box zinc finger
Cg01528	1.12148	0.979674	0.946879	1.26152	0.46357	- && - && -
Cg01534	0.899697	1.19063	0.0357955	0.425208	0.360699	- && - && -
Cg01540	5.00479	2.98744	5.57841	11.8389	2.5783	- && sp|Q0D2A9|KLH25_XENTR Kelch-like protein 25 OS=Xenopus tropicalis OX=8364 GN=klhl25 PE=2 SV=1 && PF00651:BTB/POZ domain|PF08005:PHR domain|PF07707:BTB And C-terminal Kelch
Cg01549	0.203676	0.105176	0	0.587329	0.0264047	- && - && -
Cg01567	0.509768	1.79175	0	0.943023	0.496226	- && - && -
Cg01577	1.0887	0.175042	0.0954108	9.12911	0.882531	- && - && PF03265:Deoxyribonuclease II
Cg01599	0.418517	3.76998	0.0838348	0.111612	0	- && - && -
Cg01615	0.986454	2.99959	0.856093	0.500304	0.525515	- && sp|O70497|FCN2_MOUSE Ficolin-2 OS=Mus musculus OX=10090 GN=Fcn2 PE=2 SV=2 && PF00147:Fibrinogen beta and gamma chains, C-terminal globular domain
Cg01622	0	0.0375832	0.959291	25.4845	1.6442	- && - && PF00059:Lectin C-type domain
Cg01635	55.428	19.7025	4.69685	19.4494	16.1657	- && - && -
Cg01677	0.0244514	1.80088	0	0.0216846	0.0432075	- && - && -
Cg01703	0	0.120684	0	2.84787	0.0918781	- && - && -
Cg01714	4.17565	2.65625	1.12721	2.05704	0.0498004	- && - && PF00530:Scavenger receptor cysteine-rich domain
Cg01742	0.119205	0.174505	0.231546	1.61116	0.0719842	- && - && -
Cg01792	0	4.51393	0.266036	0.950856	0	- && - && -
Cg01804	1.82077	0.120694	0.351215	0.0296469	7.30779	- && sp|Q9QZK8|DNS2A_RAT Deoxyribonuclease-2-alpha OS=Rattus norvegicus OX=10116 GN=Dnase2 PE=2 SV=1 && PF03265:Deoxyribonuclease II
Cg01807	0.0445151	0.289937	0.0122803	0.419575	0.0414767	- && - && -
Cg01809	0	0.51483	0	3.10747	0	- && - && -
Cg01827	0.567386	2.17994	0.295844	0.33607	0.674325	- && sp|Q96MB7|HARB1_HUMAN Putative nuclease HARBI1 OS=Homo sapiens OX=9606 GN=HARBI1 PE=1 SV=1 && -
Cg01840	1.54395	0.525363	3.51139	7.57859	9.32075	- && sp|Q75WF2|DNA2_ACAPL Plancitoxin-1 OS=Acanthaster planci OX=133434 PE=1 SV=1 && PF03265:Deoxyribonuclease II
Cg01845	3.41272	3.54423	2.20631	0	3.37634	- && - && -
Cg01848	0.293341	0.588634	0.111616	0.536535	0	- && sp|Q9QY48|DNS2B_MOUSE Deoxyribonuclease-2-beta OS=Mus musculus OX=10090 GN=Dnase2b PE=2 SV=1 && PF03265:Deoxyribonuclease II
Cg01881	0.350239	0.140109	0.358756	0.00756942	0.335165	- && - && PF00754:F5/8 type C domain
Cg01892	0.0647269	0.558675	0.0758771	0.016946	0.114972	- && sp|P28828|PTPRM_MOUSE Receptor-type tyrosine-protein phosphatase mu OS=Mus musculus OX=10090 GN=Ptprm PE=1 SV=2 && PF00102:Protein-tyrosine phosphatase
Cg01914	1.3394	3.84758	0.874804	0.788148	1.59905	- && - && -
Cg01932	6.39743	0	0.72377	0	1.93262	- && - && -
Cg01956	0.0198888	0	0.506604	0	0	- && - && -
Cg02028	0.889215	3.16996	0.192546	3.04717	0.268269	- && - && PF00059:Lectin C-type domain
Cg02056	0.325895	0.524849	0.0322485	0.616188	0.382756	- && - && -
Cg02142	0.547464	0.472723	0.253445	0.777845	0	- && - && -
Cg02147	1.57537	0.255395	1.1961	0.158117	2.88293	- && - && -
Cg02154	1.36419	0.793935	3.57102	0.767559	1.16558	- && sp|Q15262|PTPRK_HUMAN Receptor-type tyrosine-protein phosphatase kappa OS=Homo sapiens OX=9606 GN=PTPRK PE=1 SV=2 && PF00102:Protein-tyrosine phosphatase
Cg02171	2.6669	1.99884	0.764004	1.64924	5.61255	- && - && -
Cg02267	0.215133	0.220013	1.03723	0.14767	0.445	- && - && -
Cg02302	0.743326	1.21436	2.05981	1.6049	0.264428	- && sp|Q7Z0T3|TEMPT_APLCA Temptin OS=Aplysia californica OX=6500 PE=1 SV=1 && PF01082:Copper type II ascorbate-dependent monooxygenase, N-terminal domain|PF03712:Copper type II ascorbate-dependent monooxygenase, C-terminal domain
Cg02332	4.84615	15.8987	9.14224	0.87205	6.59205	- && sp|O86034|BDHA_RHIME D-beta-hydroxybutyrate dehydrogenase OS=Rhizobium meliloti (strain 1021) OX=266834 GN=bdhA PE=1 SV=1 && PF13561:Enoyl-(Acyl carrier protein) reductase
Cg02335	0	3.20858	0	0	0.447711	- && - && -
Cg02339	24.7908	34.2523	21.9278	7.23477	19.923	- && sp|O86034|BDHA_RHIME D-beta-hydroxybutyrate dehydrogenase OS=Rhizobium meliloti (strain 1021) OX=266834 GN=bdhA PE=1 SV=1 && PF00106:short chain dehydrogenase|PF05485:THAP domain
Cg02356	2.50488	1.59281	4.25336	2.97409	2.51138	- && sp|Q7JK24|B3GT1_GORGO Beta-1,3-galactosyltransferase 1 OS=Gorilla gorilla gorilla OX=9595 GN=B3GALT1 PE=3 SV=1 && PF01762:Galactosyltransferase
Cg02371	2.83782	2.98647	0.0991106	0	2.50707	- && sp|O86034|BDHA_RHIME D-beta-hydroxybutyrate dehydrogenase OS=Rhizobium meliloti (strain 1021) OX=266834 GN=bdhA PE=1 SV=1 && PF00106:short chain dehydrogenase
Cg02374	0.579848	1.2692	1.98596	0.310122	1.78874	- && sp|O86034|BDHA_RHIME D-beta-hydroxybutyrate dehydrogenase OS=Rhizobium meliloti (strain 1021) OX=266834 GN=bdhA PE=1 SV=1 && PF13561:Enoyl-(Acyl carrier protein) reductase
Cg02435	0.321966	0.0582564	0.0748086	0.973227	0.188204	- && sp|P48382|RFX5_HUMAN DNA-binding protein RFX5 OS=Homo sapiens OX=9606 GN=RFX5 PE=1 SV=1 && PF18326:RFX5 N-terminal domain|PF02257:RFX DNA-binding domain
Cg02456	0.670522	0.648363	1.92951	0.373801	0.258502	- && sp|Q04786|HEX_VIBVL Beta-hexosaminidase OS=Vibrio vulnificus OX=672 GN=hex PE=3 SV=1 && PF00728:Glycosyl hydrolase family 20, catalytic domain|PF02838:Glycosyl hydrolase family 20, domain 2|PF03173:Putative carbohydrate binding domain|PF03174:Chitobiase/beta-hexosaminidase C-terminal domain
Cg02466	0	0.0061079	0	0.422266	0.00293882	- && - && PF12796:Ankyrin repeats (3 copies)|PF13637:Ankyrin repeats (many copies)
Cg02535	4.83543	1.60583	6.32536	3.35144	4.31082	- && - && PF00001:7 transmembrane receptor (rhodopsin family)
Cg02538	0.55987	0	0	0	2.27928	- && - && -
Cg02570	1.58792	0.0213322	0.791293	0.839782	0.415108	- && - && -
Cg02591	0.121366	0.0546438	0.0136995	0.355276	0	- && - && PF12796:Ankyrin repeats (3 copies)
Cg02611	0.624915	0.235749	0.0993604	0.0281075	0.44082	- && - && PF00095:WAP-type (Whey Acidic Protein) 'four-disulfide core'
Cg02638	12.2909	15.6852	4.79941	2.01006	1.41484	- && - && -
Cg02655	0.877963	2.58439	5.94562	1.10182	0.829868	- && sp|Q5RLM2|S22A7_RAT Solute carrier family 22 member 7 OS=Rattus norvegicus OX=10116 GN=Slc22a7 PE=1 SV=1 && PF00001:7 transmembrane receptor (rhodopsin family)|PF00083:Sugar (and other) transporter
Cg02683	32.5919	21.2183	5.12518	13.0687	46.3799	- && - && -
Cg02684	0	0.214899	0.0479632	1.36912	0	- && - && -
Cg02685	0.0581273	0.787936	0.112928	1.49379	0.993416	- && sp|Q967R6|CPEB_APLCA Cytoplasmic polyadenylation element-binding protein OS=Aplysia californica OX=6500 PE=1 SV=1 && PF16367:RNA recognition motif|PF16366:Cytoplasmic polyadenylation element-binding protein ZZ domain|PF16368:Cytoplasmic polyadenylation element-binding protein 1 N-terminus
Cg02698	11.2498	4.36485	5.15937	2.24344	9.03418	- && sp|P10280|VKT52_ANESU KappaPI-actitoxin-Avd3a OS=Anemonia sulcata OX=6108 PE=1 SV=2 && PF00014:Kunitz/Bovine pancreatic trypsin inhibitor domain
Cg02707	0.0879204	0.281865	0	1.19239	0.0306415	- && sp|Q96FT7|ASIC4_HUMAN Acid-sensing ion channel 4 OS=Homo sapiens OX=9606 GN=ASIC4 PE=1 SV=2 && PF00858:Amiloride-sensitive sodium channel
Cg02708	1.43154	1.39649	3.1658	3.31046	3.76055	- && sp|O14522|PTPRT_HUMAN Receptor-type tyrosine-protein phosphatase T OS=Homo sapiens OX=9606 GN=PTPRT PE=1 SV=6 && PF00102:Protein-tyrosine phosphatase
Cg02712	0.0367554	0.0494822	0	1.00296	0.0556769	- && - && PF00350:Dynamin family
Cg02740	0.596258	1.72532	0.122234	0.340599	0.426911	- && - && PF13383:Methyltransferase domain
Cg02745	0.220329	0.980162	0	0	0.168107	- && - && PF09612:Bacterial protein of unknown function (HtrL_YibB)
Cg02810	2.44661	5.62095	1.82003	0.318182	0.210057	- && - && -
Cg02827	263.01	156.102	104.155	114.832	24.5036	- && sp|Q6L6Q6|LYS_CRAGI Lysozyme OS=Crassostrea gigas OX=29159 GN=lysoz PE=2 SV=1 && PF05497:Destabilase
Cg02835	0.355262	0.180878	2.2276	0	1.62475	- && - && -
Cg02838	147.931	68.3121	74.8541	134.309	55.2347	- && sp|Q6L6Q6|LYS_CRAGI Lysozyme OS=Crassostrea gigas OX=29159 GN=lysoz PE=2 SV=1 && PF05497:Destabilase
Cg02881	2.24207	1.00069	2.17617	1.58073	1.55565	- && - && PF00001:7 transmembrane receptor (rhodopsin family)
Cg02886	0.0640728	0.0426657	0.0487432	0.158538	0.00746057	- && - && PF12796:Ankyrin repeats (3 copies)|PF18738:DZIP3/ hRUL138-like HEPN
Cg02898	1.4702	0.00991766	1.28016	0.446747	0.169564	- && sp|Q9IBD8|PTPRC_CYPCA Receptor-type tyrosine-protein phosphatase C OS=Cyprinus carpio OX=7962 GN=ptprc PE=2 SV=1 && PF00102:Protein-tyrosine phosphatase
Cg02908	2.51927	10.2582	4.21026	14.9013	1.53023	- && - && -
Cg02911	1.81861	1.21598	0.190091	0.189136	0.808283	- && sp|Q7Z5L3|C1QL2_HUMAN Complement C1q-like protein 2 OS=Homo sapiens OX=9606 GN=C1QL2 PE=2 SV=2 && PF00386:C1q domain
Cg02975	0	0.15798	0.102961	0.0506686	0.837794	- && - && -
Cg02988	56.7607	24.8885	82.332	50.2975	15.7787	- && sp|Q16878|CDO1_HUMAN Cysteine dioxygenase type 1 OS=Homo sapiens OX=9606 GN=CDO1 PE=1 SV=2 && PF05995:Cysteine dioxygenase type I
Cg03004	0.198592	0.201005	0.127635	0.197363	0.0203067	- && sp|G5EBQ8|CHS2_CAEEL Chitin synthase chs-2 OS=Caenorhabditis elegans OX=6239 GN=chs-2 PE=1 SV=1 && PF03142:Chitin synthase|PF00536:SAM domain (Sterile alpha motif)|PF07647:SAM domain (Sterile alpha motif)
Cg03022	0.356621	0.429011	0.741027	1.86898	0.426277	- && - && -
Cg03040	0.033683	0.488178	0.0291702	0	0.0859249	- && sp|Q91YD4|TRPM2_MOUSE Transient receptor potential cation channel subfamily M member 2 OS=Mus musculus OX=10090 GN=Trpm2 PE=1 SV=2 && PF00520:Ion transport protein|PF18139:SLOG in TRPM
Cg03062	2.73154	0.610171	1.65753	5.22929	0.599061	- && - && PF00001:7 transmembrane receptor (rhodopsin family)
Cg03073	17.178	7.87269	1.44827	5.98286	7.84454	- && - && PF08192:Peptidase family S64
Cg03086	0	1.80082	0	0	0	- && - && -
Cg03116	0.0270939	0.538085	0.0466437	0.103572	0.0732425	- && sp|E9PTA2|TRPM2_RAT Transient receptor potential cation channel subfamily M member 2 OS=Rattus norvegicus OX=10116 GN=Trpm2 PE=1 SV=3 && PF00520:Ion transport protein|PF18139:SLOG in TRPM
Cg03121	0	0.0337341	0.028191	0.00711018	0.264623	- && - && -
Cg03149	0.0507932	0.888845	0.0497075	0	0.0585041	- && - && PF13843:Transposase IS4
Cg03160	0	1.50071	0.101012	1.30597	0.660861	- && - && PF18738:DZIP3/ hRUL138-like HEPN|PF12796:Ankyrin repeats (3 copies)
Cg03164	7.49756	6.04578	12.1794	6.07815	8.7028	- && sp|P28271|ACOC_MOUSE Cytoplasmic aconitate hydratase OS=Mus musculus OX=10090 GN=Aco1 PE=1 SV=3 && PF00330:Aconitase family (aconitate hydratase)|PF00694:Aconitase C-terminal domain
Cg03173	3.05103	7.74163	8.1062	16.9381	4.03386	- && - && -
Cg03232	0	0	0	4.94164	0	- && sp|A8XAC6|BAF1_CAEBR Barrier-to-autointegration factor 1 OS=Caenorhabditis briggsae OX=6238 GN=baf-1 PE=3 SV=1 && PF02961:Barrier to autointegration factor
Cg03269	28.7236	1.75579	12.6848	10.5984	0.0634974	- && sp|P86733|KCP_HALAI BPTI/Kunitz domain-containing protein (Fragment) OS=Haliotis asinina OX=109174 PE=1 SV=1 && PF00095:WAP-type (Whey Acidic Protein) 'four-disulfide core'
Cg03278	0.351518	7.0113	2.92869	8.06532	1.00302	- && - && PF02229:Transcriptional Coactivator p15 (PC4)
Cg03289	0	0.046669	0.0427316	0.12582	0	- && - && PF00094:von Willebrand factor type D domain
Cg03296	0	11.8988	0.426743	0.1009	6.45998	- && - && PF00386:C1q domain
Cg03300	0.284167	0.152507	0.276474	0.08602	0.996982	- && sp|Q9CY57|CHTOP_MOUSE Chromatin target of PRMT1 protein OS=Mus musculus OX=10090 GN=Chtop PE=1 SV=2 && -
Cg03301	0.895481	2.06906	1.12447	0.965086	4.98013	- && sp|Q9C0G6|DYH6_HUMAN Dynein axonemal heavy chain 6 OS=Homo sapiens OX=9606 GN=DNAH6 PE=2 SV=3 && PF12780:P-loop containing dynein motor region D4|PF12774:Hydrolytic ATP binding site of dynein motor region|PF18198:Dynein heavy chain AAA lid domain|PF17857:AAA+ lid domain|PF12781:ATP-binding dynein motor region|PF12777:Microtubule-binding stalk of dynein motor|PF08393:Dynein heavy chain, N-ter…
Cg03307	0	0	1.21445	0	0	- && - && -
Cg03368	24.2815	2.12954	7.57168	20.0202	18.4207	- && sp|Q9Y490|TLN1_HUMAN Talin-1 OS=Homo sapiens OX=9606 GN=TLN1 PE=1 SV=3 && PF00373:FERM central domain|PF16511:N-terminal or F0 domain of Talin-head FERM|PF01608:I/LWEQ domain|PF09141:Talin, middle domain
Cg03370	4.02371	1.61583	4.28563	3.80314	7.02902	- && sp|P54939|TLN1_CHICK Talin-1 OS=Gallus gallus OX=9031 GN=TLN1 PE=1 SV=2 && PF08913:Vinculin Binding Site
Cg03371	1.27841	0.435585	2.59775	0.785145	2.70398	- && sp|Q9Y4G6|TLN2_HUMAN Talin-2 OS=Homo sapiens OX=9606 GN=TLN2 PE=1 SV=4 && PF01608:I/LWEQ domain
Cg03380	7.18774	2.36299	5.71498	3.6274	9.9156	- && sp|Q9Y4G6|TLN2_HUMAN Talin-2 OS=Homo sapiens OX=9606 GN=TLN2 PE=1 SV=4 && PF01608:I/LWEQ domain
Cg03383	0.61178	0.660869	0	11.8051	0	- && sp|P26039|TLN1_MOUSE Talin-1 OS=Mus musculus OX=10090 GN=Tln1 PE=1 SV=2 && PF01608:I/LWEQ domain
Cg03384	0	1.49437	0	0	0.351077	- && - && -
Cg03390	2.54557	0	2.18472	3.13542	5.58449	- && sp|Q9Y4G6|TLN2_HUMAN Talin-2 OS=Homo sapiens OX=9606 GN=TLN2 PE=1 SV=4 && PF01608:I/LWEQ domain
Cg03438	37.461	23.6052	47.0202	25.159	24.9464	- && sp|O77633|ADA10_PIG Disintegrin and metalloproteinase domain-containing protein 10 OS=Sus scrofa OX=9823 GN=ADAM10 PE=2 SV=2 && PF13574:Metallo-peptidase family M12B Reprolysin-like|PF00200:Disintegrin|PF01562:Reprolysin family propeptide
Cg03454	0.221049	0.151771	1.35245	0.0275359	0.82099	- && - && -
Cg03478	0	0	0.443027	0.386856	0	- && - && PF14291:Domain of unknown function (DUF4371)
Cg03488	3.37423	1.48192	3.48584	1.8538	3.7353	- && sp|Q04519|ASM_MOUSE Sphingomyelin phosphodiesterase OS=Mus musculus OX=10090 GN=Smpd1 PE=1 SV=2 && PF00149:Calcineurin-like phosphoesterase
Cg03494	0	0	0.0812736	7.17046	0.15215	- && sp|P43114|PE2R4_RAT Prostaglandin E2 receptor EP4 subtype OS=Rattus norvegicus OX=10116 GN=Ptger4 PE=2 SV=1 && PF00001:7 transmembrane receptor (rhodopsin family)
Cg03496	22.7033	5.08759	35.3221	25.7883	7.67794	- && - && -
Cg03500	64.9596	121.856	57.1072	166.788	164.776	- && - && PF15715:PCNA-associated factor histone like domain
Cg03521	58.6405	50.0135	98.1398	89.9162	65.0917	- && sp|Q865F7|FABPH_MYOLU Fatty acid-binding protein, heart OS=Myotis lucifugus OX=59463 GN=FABP3 PE=2 SV=3 && PF00061:Lipocalin / cytosolic fatty-acid binding protein family
Cg03533	224.043	62.3978	171.047	132.619	85.2196	- && sp|Q865F7|FABPH_MYOLU Fatty acid-binding protein, heart OS=Myotis lucifugus OX=59463 GN=FABP3 PE=2 SV=3 && PF00061:Lipocalin / cytosolic fatty-acid binding protein family
Cg03537	3.99338	0.868332	0.0636704	0.59345	0.465278	- && - && -
Cg03574	0	0.621434	0	0.796887	0.16598	- && - && PF00084:Sushi repeat (SCR repeat)
Cg03579	1.0925	0.616232	3.06719	1.05023	4.08877	- && - && -
Cg03585	55.2039	36.4719	93.0388	75.6358	108.583	- && sp|Q96NN9|AIFM3_HUMAN Apoptosis-inducing factor 3 OS=Homo sapiens OX=9606 GN=AIFM3 PE=1 SV=1 && PF14759:Reductase C-terminal|PF00355:Rieske [2Fe-2S] domain|PF07992:Pyridine nucleotide-disulphide oxidoreductase
Cg03605	0	0.416492	0	0	0	- && - && -
Cg03607	0.733695	1.65403	0.238323	0.526741	1.00031	- && - && -
Cg03610	4.05585	4.824	25.3694	1.81935	2.72026	- && sp|P55088|AQP4_MOUSE Aquaporin-4 OS=Mus musculus OX=10090 GN=Aqp4 PE=1 SV=2 && PF00230:Major intrinsic protein
Cg03620	3.00852	5.14213	4.18195	1.3504	4.16009	- && sp|P0DOC8|CH037_DANRE Protein C8orf37 homolog OS=Danio rerio OX=7955 GN=dkey-242e21.4 PE=1 SV=1 && PF14996:Retinal Maintenance
Cg03623	0.0964952	0.0170571	1.11471	1.57235	0.349342	- && sp|Q8SWR3|SPR_DROME Sex peptide receptor OS=Drosophila melanogaster OX=7227 GN=SPR PE=1 SV=1 && PF10324:Serpentine type 7TM GPCR chemoreceptor Srw
Cg03643	0	0.744727	0	0	0.180192	- && - && -
Cg03647	4.04719	9.62547	4.46948	4.74815	2.05552	- && sp|A8WGS4|TLCD2_DANRE TLC domain-containing protein 2 OS=Danio rerio OX=7955 GN=tlcd2 PE=2 SV=1 && PF03798:TLC domain
Cg03663	2.36209	3.14727	3.2058	9.55326	2.39325	- && sp|Q8NFW1|COMA1_HUMAN Collagen alpha-1(XXII) chain OS=Homo sapiens OX=9606 GN=COL22A1 PE=2 SV=2 && PF00092:von Willebrand factor type A domain
Cg03677	2.18107	2.42539	47.0065	32.8764	1.97508	- && - && PF06083:Interleukin-17
Cg03678	8.03429	3.93445	14.8114	15.4481	56.6454	- && - && -
Cg03692	0.0436986	0.0386222	0.0427557	1.00283	0.0197753	- && - && -
Cg03720	0.455713	15.1628	1.63668	0.336569	0.260575	- && sp|Q9V5L3|C49A1_DROME Probable cytochrome P450 49a1 OS=Drosophila melanogaster OX=7227 GN=Cyp49a1 PE=2 SV=3 && PF00067:Cytochrome P450
Cg03733	2.36465	2.28876	2.76024	0.0211494	0.914095	- && - && -
Cg03745	119.217	60.6825	129.901	82.3765	62.8327	- && sp|P05153|PCKGC_CHICK Phosphoenolpyruvate carboxykinase, cytosolic [GTP] OS=Gallus gallus OX=9031 GN=PCK1 PE=2 SV=1 && PF17297:Phosphoenolpyruvate carboxykinase N-terminal domain|PF00821:Phosphoenolpyruvate carboxykinase C-terminal P-loop domain
Cg03768	2.80778	0.787017	2.03292	1.62563	2.12726	- && sp|Q6P3S6|FBX42_HUMAN F-box only protein 42 OS=Homo sapiens OX=9606 GN=FBXO42 PE=1 SV=1 && PF12937:F-box-like|PF13418:Galactose oxidase, central domain
Cg03793	0.549349	7.328	1.12483	1.93037	1.39863	- && sp|P18910|ANPRA_RAT Atrial natriuretic peptide receptor 1 OS=Rattus norvegicus OX=10116 GN=Npr1 PE=1 SV=1 && PF00211:Adenylate and Guanylate cyclase catalytic domain|PF01094:Receptor family ligand binding region|PF07714:Protein tyrosine and serine/threonine kinase|PF07701:Heme NO binding associated
Cg03804	254.207	34.2242	123.696	99.1344	64.9559	- && sp|P47736|RPGP1_HUMAN Rap1 GTPase-activating protein 1 OS=Homo sapiens OX=9606 GN=RAP1GAP PE=1 SV=2 && PF02145:Rap/ran-GAP
Cg03812	361.811	243.342	584.855	245.355	338.522	- && - && -
Cg03814	95.7187	53.6537	165.52	89.6974	119.036	- && - && -
Cg03815	0.376392	0.995172	0.396155	0.492579	0.556198	- && - && -
Cg03825	0.603922	1.22849	0.336862	0.432403	0.865249	- && sp|Q9H3Y6|SRMS_HUMAN Tyrosine-protein kinase Srms OS=Homo sapiens OX=9606 GN=SRMS PE=1 SV=1 && PF07714:Protein tyrosine and serine/threonine kinase
Cg03828	0	0	0	0.512951	0	- && sp|P46197|ANPRB_BOVIN Atrial natriuretic peptide receptor 2 OS=Bos taurus OX=9913 GN=NPR2 PE=2 SV=1 && PF07701:Heme NO binding associated|PF08376:Nitrate and nitrite sensing|PF00211:Adenylate and Guanylate cyclase catalytic domain
Cg03856	87.2133	15.0616	29.9238	16.1189	8.6621	- && sp|A3KPP3|MOG1_DANRE Ran guanine nucleotide release factor OS=Danio rerio OX=7955 GN=rangrf PE=2 SV=1 && PF04603:Ran-interacting Mog1 protein
Cg03861	4.76118	0.857281	1.96594	0	1.20748	- && - && PF00386:C1q domain
Cg03879	10.4251	3.32647	12.2694	11.2054	4.8809	- && - && PF10309:Nuclear cap-binding protein subunit 3
Cg03880	5.06054	3.20436	3.70184	1.91106	4.90172	- && sp|Q9D787|PPIL2_MOUSE RING-type E3 ubiquitin-protein ligase PPIL2 OS=Mus musculus OX=10090 GN=Ppil2 PE=1 SV=2 && PF00160:Cyclophilin type peptidyl-prolyl cis-trans isomerase/CLD|PF04641:Rtf2 RING-finger
Cg03906	0.0494644	0.0662938	0	0.610162	0.0159157	- && - && PF02902:Ulp1 protease family, C-terminal catalytic domain
Cg03909	7.5791	10.9832	2.90301	3.43823	3.18557	- && - && -
Cg03921	4.43424	9.89899	4.5363	5.85534	4.63948	- && sp|Q9D787|PPIL2_MOUSE RING-type E3 ubiquitin-protein ligase PPIL2 OS=Mus musculus OX=10090 GN=Ppil2 PE=1 SV=2 && PF00160:Cyclophilin type peptidyl-prolyl cis-trans isomerase/CLD|PF04641:Rtf2 RING-finger
Cg03950	0.0291919	0.0137585	0.935263	0.151189	0.0140892	- && - && -
Cg03962	193.315	127.803	276.449	174.569	125.067	- && sp|P53567|CEBPG_HUMAN CCAAT/enhancer-binding protein gamma OS=Homo sapiens OX=9606 GN=CEBPG PE=1 SV=1 && PF07716:Basic region leucine zipper
Cg03965	0.589844	1.13006	4.00881	3.63617	0.416649	- && - && PF07716:Basic region leucine zipper
Cg03971	21.5859	8.9124	21.1773	32.0063	39.8577	- && sp|Q61909|MTG8_MOUSE Protein CBFA2T1 OS=Mus musculus OX=10090 GN=Runx1t1 PE=2 SV=1 && PF08788:NHR2 domain like|PF01753:MYND finger|PF07531:NHR1 homology to TAF
Cg03972	0	0	0	1.83478	17.61	- && sp|Q5ZLC8|ANR52_CHICK Serine/threonine-protein phosphatase 6 regulatory ankyrin repeat subunit C OS=Gallus gallus OX=9031 GN=ANKRD52 PE=2 SV=1 && PF13637:Ankyrin repeats (many copies)|PF12796:Ankyrin repeats (3 copies)
Cg03974	0.0450943	0.0232243	0.0441214	1.32482	20.5492	- && - && -
Cg03975	0.00460886	0.0122204	0.020035	0.00300177	0.109982	- && - && -
Cg03980	10.2796	15.2454	5.43227	10.7195	10.4626	- && sp|Q9H3J6|MTRFR_HUMAN Mitochondrial translation release factor in rescue OS=Homo sapiens OX=9606 GN=MTRFR PE=1 SV=1 && PF00472:RF-1 domain
Cg03983	3.10906	1.84338	0.394444	1.12668	4.27152	- && - && -
Cg03984	2.26727	6.60354	1.64819	4.56012	3.00841	- && - && -
Cg03989	16.4957	41.9313	15.9956	5.56036	20.7527	- && sp|A4QMS7|CE049_HUMAN Uncharacterized protein C5orf49 OS=Homo sapiens OX=9606 GN=C5orf49 PE=1 SV=1 && PF15074:Domain of unknown function (DUF4541)
Cg03996	6.89098	9.04324	2.68179	3.52981	4.33148	- && - && -
Cg04001	46.6495	90.4413	35.3267	59.0046	52.6805	- && sp|Q5M8X5|TPC2L_XENTR Trafficking protein particle complex subunit 2-like protein OS=Xenopus tropicalis OX=8364 GN=trappc2l PE=2 SV=1 && PF04628:Sedlin, N-terminal conserved region
Cg04019	137.789	94.6484	110.178	105.462	37.2096	- && - && -
Cg04024	1.95501	5.9523	1.9094	5.47356	6.10688	- && sp|Q9I9A7|CDT1_XENLA DNA replication factor Cdt1 OS=Xenopus laevis OX=8355 GN=cdt1 PE=1 SV=2 && PF08839:DNA replication factor CDT1 like|PF16679:DNA replication factor Cdt1 C-terminal domain
Cg04034	0.0400642	0.431699	0	0	0	- && sp|P22717|GCYB2_RAT Guanylate cyclase soluble subunit beta-2 OS=Rattus norvegicus OX=10116 GN=Gucy1b2 PE=2 SV=1 && PF00211:Adenylate and Guanylate cyclase catalytic domain|PF07701:Heme NO binding associated
Cg04038	1.25989	0.244245	0.532525	0	3.43384	- && - && PF00059:Lectin C-type domain
Cg04044	0.078369	0.148047	0.218488	12.814	116.373	- && sp|Q2T9W3|CCD63_BOVIN Coiled-coil domain-containing protein 63 OS=Bos taurus OX=9913 GN=CCDC63 PE=2 SV=1 && -
Cg04049	0.139956	0.220388	2.02479	0.147972	0.303892	- && - && -
Cg04052	13.1486	10.7088	34.5366	19.9191	8.90326	- && sp|Q9JMA9|S6A14_MOUSE Sodium- and chloride-dependent neutral and basic amino acid transporter B(0+) OS=Mus musculus OX=10090 GN=Slc6a14 PE=1 SV=1 && PF00209:Sodium:neurotransmitter symporter family
Cg04071	2.93286	1.01799	2.95024	8.30182	1.33196	- && - && -
Cg04075	4.8887	2.10346	16.1574	10.5606	29.4235	- && - && -
Cg04077	2.77405	1.77362	7.67797	20.139	8.81759	- && - && -
Cg04164	0.607442	1.44048	0.701561	2.83304	0.48365	- && sp|Q96S79|RSLAB_HUMAN Ras-like protein family member 10B OS=Homo sapiens OX=9606 GN=RASL10B PE=1 SV=1 && PF00071:Ras family
Cg04166	9.81332	2.59547	6.81795	6.51725	5.98519	- && sp|Q8IW41|MAPK5_HUMAN MAP kinase-activated protein kinase 5 OS=Homo sapiens OX=9606 GN=MAPKAPK5 PE=1 SV=2 && PF00069:Protein kinase domain
Cg04173	4.44493	9.00699	6.72852	9.99664	4.02566	- && sp|Q90476|LHX1_DANRE LIM/homeobox protein Lhx1 OS=Danio rerio OX=7955 GN=lhx1a PE=2 SV=1 && PF00412:LIM domain|PF00046:Homeodomain
Cg04176	20.014	2.18701	6.08956	8.79914	7.51682	- && sp|Q9ULZ9|MMP17_HUMAN Matrix metalloproteinase-17 OS=Homo sapiens OX=9606 GN=MMP17 PE=1 SV=4 && PF00413:Matrixin|PF00045:Hemopexin
Cg04178	8.01784	11.3178	12.3687	21.7378	46.4221	- && sp|Q9JHI0|MMP19_MOUSE Matrix metalloproteinase-19 OS=Mus musculus OX=10090 GN=Mmp19 PE=2 SV=1 && PF01471:Putative peptidoglycan binding domain|PF00045:Hemopexin|PF00413:Matrixin
Cg04218	0.00719064	0	0.17682	0	0.00650808	- && sp|P33527|MRP1_HUMAN Multidrug resistance-associated protein 1 OS=Homo sapiens OX=9606 GN=ABCC1 PE=1 SV=3 && PF00005:ABC transporter|PF00664:ABC transporter transmembrane region
Cg04220	11.2903	9.10356	24.3987	13.5652	17.3552	- && - && -
Cg04221	2.58955	2.17924	6.22107	3.60988	2.45176	- && - && -
Cg04222	17.2581	14.7024	30.3178	20.5951	24.1336	- && - && -
Cg04223	2.11241	0.696402	2.12073	2.46407	3.78245	- && sp|Q6P9S0|MTSS2_MOUSE Protein MTSS 2 OS=Mus musculus OX=10090 GN=Mtss2 PE=1 SV=1 && PF08397:IRSp53/MIM homology domain
Cg04228	0.311843	4.13809	0.547493	0.0794688	0	- && - && -
Cg04229	0	0.900984	0	0.119131	0	- && - && -
Cg04256	8.48831	14.0165	5.4949	17.7267	18.6406	- && sp|Q6NZQ0|CC189_MOUSE Coiled-coil domain-containing protein 189 OS=Mus musculus OX=10090 GN=Ccdc189 PE=1 SV=2 && PF14769:Flagellar C1a complex subunit C1a-32
Cg04261	5.50355	3.36905	9.48576	6.41901	5.31406	- && sp|Q9Z0J4|NOS1_MOUSE Nitric oxide synthase, brain OS=Mus musculus OX=10090 GN=Nos1 PE=1 SV=1 && PF00258:Flavodoxin|PF00595:PDZ domain|PF00667:FAD binding domain|PF00175:Oxidoreductase NAD-binding domain|PF02898:Nitric oxide synthase, oxygenase domain
Cg04268	13.097	5.20735	10.7819	7.77022	9.7564	- && sp|Q5F464|LPP_CHICK Lipoma-preferred partner homolog OS=Gallus gallus OX=9031 GN=LPP PE=2 SV=1 && PF00412:LIM domain
Cg04284	0.815072	1.32781	0.455485	0.910037	0.680787	- && sp|O75095|MEGF6_HUMAN Multiple epidermal growth factor-like domains protein 6 OS=Homo sapiens OX=9606 GN=MEGF6 PE=1 SV=4 && PF07645:Calcium-binding EGF domain|PF14670:Coagulation Factor Xa inhibitory site|PF12662:Complement Clr-like EGF-like
Cg04289	1.14011	2.68257	0.532261	0.560738	1.26441	- && sp|P09487|PPBT_BOVIN Alkaline phosphatase, tissue-nonspecific isozyme OS=Bos taurus OX=9913 GN=ALPL PE=1 SV=2 && PF00245:Alkaline phosphatase
Cg04299	3.65558	6.53297	2.11947	4.15083	6.49822	- && sp|A8TX70|CO6A5_HUMAN Collagen alpha-5(VI) chain OS=Homo sapiens OX=9606 GN=COL6A5 PE=1 SV=1 && PF00092:von Willebrand factor type A domain
Cg04306	34.0588	17.3263	58.2365	24.9132	21.0686	- && sp|Q555L8|Y4695_DICDI SH3 and F-BAR domain-containing protein DDB_G0274695 OS=Dictyostelium discoideum OX=44689 GN=DDB_G0274695 PE=4 SV=1 && PF00611:Fes/CIP4, and EFC/F-BAR homology domain
Cg04309	5.83637	9.12685	3.7723	7.12971	2.29598	- && sp|Q86YT5|S13A5_HUMAN Solute carrier family 13 member 5 OS=Homo sapiens OX=9606 GN=SLC13A5 PE=1 SV=1 && PF00939:Sodium:sulfate symporter transmembrane region
Cg04314	21.5717	10.1846	24.2369	14.0476	7.68885	- && sp|Q503M4|MT12B_DANRE Monocarboxylate transporter 12-B OS=Danio rerio OX=7955 GN=slc16a12b PE=2 SV=1 && PF09606:ARC105 or Med15 subunit of Mediator complex non-fungal
Cg04323	12.6923	5.3091	11.4874	10.9143	16.2697	- && sp|Q7PPA5|ATC1_ANOGA Calcium-transporting ATPase sarcoplasmic/endoplasmic reticulum type OS=Anopheles gambiae OX=7165 GN=SERCA PE=3 SV=5 && PF00122:E1-E2 ATPase|PF00690:Cation transporter/ATPase, N-terminus|PF13246:Cation transport ATPase (P-type)|PF00689:Cation transporting ATPase, C-terminus|PF12710:haloacid dehalogenase-like hydrolase
Cg04327	3166.05	2198.33	5826.5	554.692	1713.27	- && - && -
Cg04328	6616.71	6590.02	13674.5	1433.59	3979.34	- && - && -
Cg04337	0.0265191	0.189582	0	0.271351	0	- && sp|Q9HCF6|TRPM3_HUMAN Transient receptor potential cation channel subfamily M member 3 OS=Homo sapiens OX=9606 GN=TRPM3 PE=2 SV=4 && PF00520:Ion transport protein|PF18139:SLOG in TRPM
Cg04339	5.14302	1.41494	3.38786	7.622	8.31392	- && sp|Q6EDY6|CARL1_MOUSE F-actin-uncapping protein LRRC16A OS=Mus musculus OX=10090 GN=Carmil1 PE=1 SV=2 && PF16000:CARMIL C-terminus|PF17888:Carmil pleckstrin homology domain
Cg04340	2.4438	1.49127	5.35263	1.12885	1.37082	- && - && PF13855:Leucine rich repeat
Cg04374	0	0	3.10167	0.108678	0.49212	- && - && -
Cg04386	0	0.0483641	0.0588102	1.12394	0.0862585	- && - && -
Cg04387	2.06828	2.62934	0.199697	1.65045	2.42988	- && - && -
Cg04399	97.9461	80.7071	164.556	69.4378	59.8781	- && sp|P70503|NR0B1_RAT Nuclear receptor subfamily 0 group B member 1 OS=Rattus norvegicus OX=10116 GN=Nr0b1 PE=2 SV=1 && PF00104:Ligand-binding domain of nuclear hormone receptor
Cg04402	2.11366	0.835144	2.44192	1.72537	1.48853	- && sp|Q9H0J9|PAR12_HUMAN Protein mono-ADP-ribosyltransferase PARP12 OS=Homo sapiens OX=9606 GN=PARP12 PE=1 SV=1 && PF00644:Poly(ADP-ribose) polymerase catalytic domain
Cg04410	3.7009	1.46851	4.03055	4.31549	4.07182	- && sp|Q54YM7|TM2D2_DICDI TM2 domain-containing protein DDB_G0278163 OS=Dictyostelium discoideum OX=44689 GN=DDB_G0278163 PE=3 SV=1 && PF05154:TM2 domain
Cg04415	2.16806	6.4475	2.88166	1.48096	2.2635	- && sp|Q8UW76|TBX20_CHICK T-box transcription factor TBX20 OS=Gallus gallus OX=9031 GN=TBX20 PE=2 SV=1 && PF00907:T-box
Cg04436	10.2424	3.18168	6.71668	5.13383	5.01834	- && - && -
Cg04441	0	0.185351	0.175938	1.21632	9.26732	- && - && PF00096:Zinc finger, C2H2 type
Cg04451	7.31341	12.6803	6.02123	9.13671	12.0465	- && sp|A5GFW1|AURKA_PIG Aurora kinase A OS=Sus scrofa OX=9823 GN=AURKA PE=3 SV=1 && PF13445:RING-type zinc-finger|PF00069:Protein kinase domain
Cg04452	0	0.00555944	0	0.26822	4.63292	- && - && -
Cg04460	55.8102	108.354	39.281	7.32609	19.0097	- && - && PF03492:SAM dependent carboxyl methyltransferase
Cg04470	13.3296	13.1529	5.64647	11.1678	17.3321	- && sp|P47727|CBR1_RAT Carbonyl reductase [NADPH] 1 OS=Rattus norvegicus OX=10116 GN=Cbr1 PE=1 SV=2 && PF00106:short chain dehydrogenase
Cg04472	0.14655	1.03057	0.186289	0.643923	0.510232	- && sp|Q68EF4|GRM4_MOUSE Metabotropic glutamate receptor 4 OS=Mus musculus OX=10090 GN=Grm4 PE=1 SV=2 && PF00003:7 transmembrane sweet-taste receptor of 3 GCPR|PF01094:Receptor family ligand binding region
Cg04473	0.947888	6.48677	0.693568	3.22824	2.63794	- && - && -
Cg04481	27.1702	0.72459	8.15113	15.2144	9.79568	- && - && -
Cg04495	0.1485	0.0792945	0.199868	0.765357	0.0361192	- && - && PF09588:YqaJ-like viral recombinase domain
Cg04510	3.32663	4.44087	1.35816	1.36843	2.9698	- && sp|Q76EQ0|SRR_RAT Serine racemase OS=Rattus norvegicus OX=10116 GN=Srr PE=1 SV=1 && PF00291:Pyridoxal-phosphate dependent enzyme
Cg04517	0	0.0818543	0.0332016	6.91796	76.5328	- && - && -
Cg04519	8.63807	3.68259	7.51776	5.7688	5.05023	- && sp|A5HK05|APBP2_RAT Amyloid protein-binding protein 2 OS=Rattus norvegicus OX=10116 GN=Appbp2 PE=2 SV=1 && PF13424:Tetratricopeptide repeat
Cg04525	0.777808	0.566059	0	0	1.57585	- && - && -
Cg04533	18.5381	14.263	66.4334	22.6999	12.5465	- && sp|Q86YT5|S13A5_HUMAN Solute carrier family 13 member 5 OS=Homo sapiens OX=9606 GN=SLC13A5 PE=1 SV=1 && PF00939:Sodium:sulfate symporter transmembrane region
Cg04549	0.917289	1.02488	0.206523	0.369738	0.421574	- && - && PF03281:Mab-21 protein
Cg04553	2.43138	1.68161	0.157742	0.2004	0.191926	- && - && -
Cg04557	0.443408	1.02181	0.450284	0.273735	1.62575	- && sp|Q8IVF4|DYH10_HUMAN Dynein axonemal heavy chain 10 OS=Homo sapiens OX=9606 GN=DNAH10 PE=1 SV=4 && PF18199:Dynein heavy chain C-terminal domain|PF12777:Microtubule-binding stalk of dynein motor|PF12781:ATP-binding dynein motor region|PF12780:P-loop containing dynein motor region D4|PF17852:Dynein heavy chain AAA lid domain|PF08393:Dynein heavy chain, N-terminal region 2|PF17857:AAA+ lid dom…
Cg04563	7.55324	7.20771	6.35795	5.92059	15.7094	- && - && -
Cg04581	152.59	46.4747	41.796	273.582	109.306	- && sp|P42674|BP10_PARLI Blastula protease 10 OS=Paracentrotus lividus OX=7656 GN=BP10 PE=2 SV=1 && PF01400:Astacin (Peptidase family M12A)|PF01549:ShK domain-like
Cg04582	0	2.41653	0.291142	0.475163	1.21397	- && - && -
Cg04583	5.24298	15.8888	6.77788	17.8333	27.6994	- && sp|Q9H0C1|ZMY12_HUMAN Zinc finger MYND domain-containing protein 12 OS=Homo sapiens OX=9606 GN=ZMYND12 PE=1 SV=3 && PF17874:MalT-like TPR region|PF01753:MYND finger
Cg04588	0.402509	8.2413	0.671914	1.27152	3.16007	- && sp|Q54BU4|ABCB1_DICDI ABC transporter B family member 1 OS=Dictyostelium discoideum OX=44689 GN=abcB1 PE=3 SV=1 && PF00005:ABC transporter|PF00664:ABC transporter transmembrane region
Cg04615	2.24059	0.23612	0.757246	7.1589	0.608037	- && - && PF00520:Ion transport protein
Cg04628	32.1997	6.66578	17.1818	6.67944	7.01774	- && sp|Q08462|ADCY2_HUMAN Adenylate cyclase type 2 OS=Homo sapiens OX=9606 GN=ADCY2 PE=1 SV=5 && PF00211:Adenylate and Guanylate cyclase catalytic domain|PF16214:Adenylyl cyclase N-terminal extracellular and transmembrane region
Cg04639	7.42195	29.5295	9.80749	32.6287	22.426	- && sp|Q7ZT01|PSF3_XENLA DNA replication complex GINS protein PSF3 OS=Xenopus laevis OX=8355 GN=gins3 PE=1 SV=1 && PF05916:GINS complex protein
Cg04645	0.138517	0.627189	0.0912313	0.256283	0.690903	- && sp|Q61143|TRPC6_MOUSE Short transient receptor potential channel 6 OS=Mus musculus OX=10090 GN=Trpc6 PE=1 SV=3 && PF00520:Ion transport protein|PF08344:Transient receptor ion channel II
Cg04656	0.200973	0.796215	0.762501	3.33701	18.8339	- && - && -
Cg04657	23.9452	17.1832	33.812	13.2655	15.2401	- && sp|P58058|NADK_MOUSE NAD kinase OS=Mus musculus OX=10090 GN=Nadk PE=1 SV=2 && PF01513:ATP-NAD kinase
Cg04687	0.869994	0.856589	0.451607	0.613196	0.0218285	- && - && -
Cg04691	1.22083	1.31506	0.453841	0.981243	0.593468	- && - && -
Cg04727	6.76179	16.1734	6.25926	48.0204	43.9507	- && sp|Q9Y6J8|STYL1_HUMAN Serine/threonine/tyrosine-interacting-like protein 1 OS=Homo sapiens OX=9606 GN=STYXL1 PE=1 SV=1 && PF00581:Rhodanese-like domain|PF00782:Dual specificity phosphatase, catalytic domain
Cg04755	0.416724	0.540092	0.0855694	0.335405	0.929288	- && sp|E9PVD1|CCD62_MOUSE Coiled-coil domain-containing protein 62 OS=Mus musculus OX=10090 GN=Ccdc62 PE=3 SV=1 && -
Cg04770	3.6188	4.25382	1.15708	1.03318	1.60159	- && sp|P22935|RABP2_MOUSE Cellular retinoic acid-binding protein 2 OS=Mus musculus OX=10090 GN=Crabp2 PE=2 SV=2 && PF00061:Lipocalin / cytosolic fatty-acid binding protein family
Cg04779	3.21241	1.42427	3.72416	2.47924	9.27307	- && sp|Q6DDT1|INO1B_XENLA Inositol-3-phosphate synthase 1-B OS=Xenopus laevis OX=8355 GN=isyna1-b PE=2 SV=2 && PF07994:Myo-inositol-1-phosphate synthase|PF01658:Myo-inositol-1-phosphate synthase
Cg04785	35.9832	18.2723	38.7684	21.238	34.823	- && sp|Q9VVY3|GBS76_DROME Glycogen-binding subunit 76A OS=Drosophila melanogaster OX=7227 GN=Gbs-76A PE=1 SV=1 && PF03370:Carbohydrate/starch-binding module (family 21)
Cg04790	0	0.13115	0	0.617229	0	- && sp|A6NMZ7|CO6A6_HUMAN Collagen alpha-6(VI) chain OS=Homo sapiens OX=9606 GN=COL6A6 PE=1 SV=2 && PF00092:von Willebrand factor type A domain
Cg04791	0	0.228896	0	0.0302778	0	- && sp|A4IF63|TRIM2_BOVIN Tripartite motif-containing protein 2 OS=Bos taurus OX=9913 GN=TRIM2 PE=2 SV=1 && PF13445:RING-type zinc-finger|PF00917:MATH domain
Cg04821	28.1651	7.50049	15.2167	16.4399	8.47346	- && sp|Q95XZ6|LAAT1_CAEEL Lysosomal amino acid transporter 1 OS=Caenorhabditis elegans OX=6239 GN=laat-1 PE=1 SV=2 && PF04193:PQ loop repeat
Cg04830	0.262075	0.384464	0.531252	0.158474	1.62683	- && sp|Q3UY96|CFA74_MOUSE Cilia- and flagella-associated protein 74 OS=Mus musculus OX=10090 GN=Cfap74 PE=2 SV=3 && -
Cg04837	1.35107	2.2793	0.436088	2.26865	1.20975	- && sp|Q6NRV0|TRAIP_XENLA E3 ubiquitin-protein ligase TRAIP OS=Xenopus laevis OX=8355 GN=traip PE=1 SV=2 && PF13639:Ring finger domain
Cg04840	4.65253	4.67453	2.89577	1.71389	6.63016	- && sp|Q9DAM1|LRC34_MOUSE Leucine-rich repeat-containing protein 34 OS=Mus musculus OX=10090 GN=Lrrc34 PE=1 SV=1 && PF13516:Leucine Rich repeat
Cg04849	5.01076	7.20125	2.80831	4.67322	2.60048	- && sp|Q6GLK6|ACSF3_XENLA Malonate--CoA ligase ACSF3, mitochondrial OS=Xenopus laevis OX=8355 GN=acsf3 PE=2 SV=1 && PF00501:AMP-binding enzyme
Cg04860	0	0.411209	1.51651	0.17962	2.49855	- && - && -
Cg04872	8.1856	7.79731	8.02051	6.15816	12.3159	- && sp|Q5U367|PLOD3_RAT Multifunctional procollagen lysine hydroxylase and glycosyltransferase LH3 OS=Rattus norvegicus OX=10116 GN=Plod3 PE=1 SV=1 && -
Cg04874	2.93724	1.68689	2.3924	2.12612	19.5236	- && - && PF00059:Lectin C-type domain
Cg04894	1.88665	3.40691	1.09364	1.99372	0	- && - && -
Cg04902	3.10774	8.53587	3.1943	1.9873	0.686124	- && - && -
Cg04903	88.8171	24.946	72.435	98.5649	79.9797	- && sp|B0R0D7|COR1C_DANRE Coronin-1C-A OS=Danio rerio OX=7955 GN=coro1ca PE=2 SV=1 && PF16300:Type of WD40 repeat|PF08953:Domain of unknown function (DUF1899)
Cg04908	0.159229	0.208731	0.652395	0.0595051	3.7406	- && - && PF03067:Lytic polysaccharide mono-oxygenase, cellulose-degrading
Cg04914	1.04699	0.97094	1.7549	0.15005	1.35436	- && - && -
Cg04922	6.46847	3.44528	7.77685	9.25572	10.4882	- && sp|P53565|CUX1_RAT Homeobox protein cut-like 1 OS=Rattus norvegicus OX=10116 GN=Cux1 PE=1 SV=2 && PF02376:CUT domain
Cg04932	21.3072	14.9093	32.7125	16.8563	19.8313	- && sp|P70403|CASP_MOUSE Protein CASP OS=Mus musculus OX=10090 GN=Cux1 PE=1 SV=2 && PF08172:CASP C terminal
Cg04937	0.541473	0.681502	0.0335347	0.301705	0.455602	- && - && PF03189:Otopetrin
Cg04938	0.167772	0	0.235299	0.0277475	0.639581	- && - && PF03189:Otopetrin
Cg04945	0.346157	0.157281	0.152693	0.0388507	0.384255	- && sp|P09849|LPH_RABIT Lactase-phlorizin hydrolase OS=Oryctolagus cuniculus OX=9986 GN=LCT PE=1 SV=1 && PF00232:Glycosyl hydrolase family 1
Cg04959	5.36684	10.7132	4.41249	1.90885	2.53695	- && sp|Q3BCR8|TPMT_PANTR Thiopurine S-methyltransferase OS=Pan troglodytes OX=9598 GN=TPMT PE=2 SV=1 && PF05724:Thiopurine S-methyltransferase (TPMT)
Cg04968	2.5289	4.54502	1.05491	0.681153	1.69995	- && sp|Q761V0|SC6A5_MOUSE Sodium- and chloride-dependent glycine transporter 2 OS=Mus musculus OX=10090 GN=Slc6a5 PE=1 SV=1 && PF00209:Sodium:neurotransmitter symporter family
Cg04971	0.684458	2.55886	0.928449	3.24766	2.78209	- && sp|F1NPG5|CENPT_CHICK Centromere protein T OS=Gallus gallus OX=9031 GN=CENPT PE=1 SV=2 && PF15511:Centromere kinetochore component CENP-T histone fold
Cg04985	1.96234	1.55062	4.70279	2.87564	2.75038	- && sp|Q9CX98|CP2U1_MOUSE Cytochrome P450 2U1 OS=Mus musculus OX=10090 GN=Cyp2u1 PE=2 SV=2 && PF00067:Cytochrome P450
Cg04987	12.9703	0.779479	12.4537	7.42752	1.76348	- && - && PF02229:Transcriptional Coactivator p15 (PC4)
Cg04988	8.5745	1.81773	20.2107	26.2401	69.7862	- && - && -
Cg04989	1.39031	0.434387	3.80731	3.85324	2.61679	- && - && PF10324:Serpentine type 7TM GPCR chemoreceptor Srw
Cg05005	0.343811	2.95431	0.281142	0.287012	0.0598023	- && sp|P15870|H1D_STRPU Histone H1-delta OS=Strongylocentrotus purpuratus OX=7668 PE=3 SV=1 && PF00538:linker histone H1 and H5 family
Cg05012	0	0.0628895	0.342793	0.542864	0	- && sp|Q3V050|S47A2_MOUSE Multidrug and toxin extrusion protein 2 OS=Mus musculus OX=10090 GN=Slc47a2 PE=1 SV=1 && PF01554:MatE
Cg05032	5.20077	6.78535	7.20293	7.81583	3.14517	- && sp|O74451|YCG6_SCHPO Putative tRNA pseudouridine synthase C16C4.06c OS=Schizosaccharomyces pombe (strain 972 / ATCC 24843) OX=284812 GN=SPCC16C4.06c PE=3 SV=2 && -
Cg05033	2.78742	6.23031	1.79719	8.18507	6.51348	- && sp|Q5BIX7|SPDLA_XENLA Protein Spindly-A OS=Xenopus laevis OX=8355 GN=spdl1-a PE=2 SV=1 && -
Cg05058	0.858681	0.897213	8.71867	0.557529	0.222242	- && - && -
Cg05062	1.46014	3.16235	1.09267	0.864562	1.41217	- && sp|Q3UVX5|GRM5_MOUSE Metabotropic glutamate receptor 5 OS=Mus musculus OX=10090 GN=Grm5 PE=1 SV=2 && PF01094:Receptor family ligand binding region|PF00003:7 transmembrane sweet-taste receptor of 3 GCPR
Cg05068	18.9745	41.5724	14.2982	140.738	76.0225	- && sp|Q567I9|CB5D1_DANRE Cytochrome b5 domain-containing protein 1 OS=Danio rerio OX=7955 GN=cyb5d1 PE=2 SV=1 && PF00173:Cytochrome b5-like Heme/Steroid binding domain
Cg05083	4.144	3.74605	13.2976	6.34513	4.04948	- && sp|P45885|ACT2_BACDO Actin-2, muscle-specific OS=Bactrocera dorsalis OX=27457 PE=2 SV=1 && PF00022:Actin
Cg05085	0.819015	0.899527	2.75882	3.45521	0.719773	- && sp|Q93129|ACTC_BRABE Actin, cytoplasmic OS=Branchiostoma belcheri OX=7741 PE=2 SV=1 && PF00022:Actin
Cg05086	18.5484	13.3414	20.6652	18.3672	4.53379	- && - && PF05050:Methyltransferase FkbM domain
Cg05095	60.5172	33.2117	69.8048	30.0708	27.1284	- && - && PF00071:Ras family
Cg05099	2.01359	0.862596	0.265842	1.05306	2.0464	- && - && -
Cg05101	0.186652	0.494881	0.29428	0.0272212	0.495122	- && sp|Q08347|BDS1_YEAST Alkyl/aryl-sulfatase BDS1 OS=Saccharomyces cerevisiae (strain ATCC 204508 / S288c) OX=559292 GN=BDS1 PE=1 SV=1 && PF14863:Alkyl sulfatase dimerisation|PF14864:Alkyl sulfatase C-terminal|PF00753:Metallo-beta-lactamase superfamily
Cg05124	6.0341	7.2066	1.66394	3.77726	2.06075	- && - && PF00096:Zinc finger, C2H2 type
Cg05126	358.815	286.289	568.358	326.224	261.116	- && sp|Q9UBQ7|GRHPR_HUMAN Glyoxylate reductase/hydroxypyruvate reductase OS=Homo sapiens OX=9606 GN=GRHPR PE=1 SV=1 && PF02826:D-isomer specific 2-hydroxyacid dehydrogenase, NAD binding domain|PF00389:D-isomer specific 2-hydroxyacid dehydrogenase, catalytic domain
Cg05140	5.77933	8.82208	4.2091	5.60379	3.44162	- && - && -
Cg05141	10.1523	5.68775	15.3728	12.6021	8.4897	- && sp|Q96BZ8|LENG1_HUMAN Leukocyte receptor cluster member 1 OS=Homo sapiens OX=9606 GN=LENG1 PE=1 SV=1 && PF10197:N-terminal domain of CBF1 interacting co-repressor CIR
Cg05143	0.876302	4.03499	2.03302	5.63947	1.36702	- && - && PF00001:7 transmembrane receptor (rhodopsin family)
Cg05150	0.0434974	0.0235751	0.161857	0.0829107	0.459904	- && - && PF01347:Lipoprotein amino terminal region
Cg05153	113.031	43.3107	179.225	41.6946	81.0916	- && sp|P22758|TGM1_RABIT Protein-glutamine gamma-glutamyltransferase K OS=Oryctolagus cuniculus OX=9986 GN=TGM1 PE=2 SV=2 && PF00868:Transglutaminase family|PF01841:Transglutaminase-like superfamily
Cg05154	4.4412	3.29842	8.27475	4.38897	6.05594	- && sp|P28039|AOAH_HUMAN Acyloxyacyl hydrolase OS=Homo sapiens OX=9606 GN=AOAH PE=1 SV=1 && -
Cg05157	62.423	26.0644	63.1245	42.4819	53.99	- && sp|Q90837|ERG_CHICK Transcriptional regulator Erg OS=Gallus gallus OX=9031 GN=ERG PE=2 SV=1 && PF00178:Ets-domain|PF02198:Sterile alpha motif (SAM)/Pointed domain
Cg05166	19.8621	15.1874	33.4486	23.7013	47.8727	- && - && PF00001:7 transmembrane receptor (rhodopsin family)
Cg05167	10.1854	11.4294	4.33238	11.4723	14.0955	- && sp|Q26627|SUREJ_STRPU Sperm receptor for egg jelly OS=Strongylocentrotus purpuratus OX=7668 GN=REJ PE=1 SV=1 && PF01549:ShK domain-like|PF00059:Lectin C-type domain
Cg05190	37.1882	29.3053	117.494	46.7914	103.155	- && sp|O75131|CPNE3_HUMAN Copine-3 OS=Homo sapiens OX=9606 GN=CPNE3 PE=1 SV=1 && PF00168:C2 domain|PF07002:Copine
Cg05202	0.207527	1.0541	0.07167	0.0103927	0.0530737	- && - && PF02816:Alpha-kinase family
Cg05203	0.341803	0.648823	0	0.361003	0.321591	- && sp|Q19673|TYR3_CAEEL Putative tyrosinase-like protein tyr-3 OS=Caenorhabditis elegans OX=6239 GN=tyr-3 PE=3 SV=5 && PF00264:Common central domain of tyrosinase
Cg05217	3.69637	5.02608	1.50875	0.420777	4.19399	- && sp|P86786|GIGA3_CRAGI Gigasin-3a (Fragment) OS=Crassostrea gigas OX=29159 PE=1 SV=1 && -
Cg05219	2.44905	3.67522	1.0451	3.31852	2.68418	- && - && PF07525:SOCS box
Cg05222	46.4533	21.1733	39.5409	22.9376	6.97067	- && sp|Q969X6|UTP4_HUMAN U3 small nucleolar RNA-associated protein 4 homolog OS=Homo sapiens OX=9606 GN=UTP4 PE=1 SV=1 && -
Cg05241	2.22066	3.61829	1.65241	5.17329	8.82689	- && sp|Q95JT3|LRC43_MACFA Leucine-rich repeat-containing protein 43 OS=Macaca fascicularis OX=9541 GN=LRRC43 PE=2 SV=1 && PF14580:Leucine-rich repeat
Cg05272	1.05439	1.48401	3.59515	1.08541	1.69026	- && sp|Q86YT5|S13A5_HUMAN Solute carrier family 13 member 5 OS=Homo sapiens OX=9606 GN=SLC13A5 PE=1 SV=1 && PF00939:Sodium:sulfate symporter transmembrane region
Cg05285	17.4149	26.0332	8.23576	4.02996	6.80233	- && sp|P41924|RYL1_YARLI Ras-like GTP-binding protein RYL1 OS=Yarrowia lipolytica (strain CLIB 122 / E 150) OX=284591 GN=RYL1 PE=3 SV=1 && PF00071:Ras family
Cg05299	22.8374	13.7876	50.3998	19.9397	11.7166	- && sp|P51452|DUS3_HUMAN Dual specificity protein phosphatase 3 OS=Homo sapiens OX=9606 GN=DUSP3 PE=1 SV=1 && PF00782:Dual specificity phosphatase, catalytic domain
Cg05309	4.72633	1.26889	3.66113	2.77428	1.97776	- && sp|Q8IYT8|ULK2_HUMAN Serine/threonine-protein kinase ULK2 OS=Homo sapiens OX=9606 GN=ULK2 PE=1 SV=3 && PF12063:Domain of unknown function (DUF3543)|PF00069:Protein kinase domain
Cg05326	0.153458	0.498051	0.284034	0.0315399	0.485561	- && - && PF01302:CAP-Gly domain
Cg05378	0.738865	1.9527	0.355617	2.24925	0.993494	- && sp|Q8TDB6|DTX3L_HUMAN E3 ubiquitin-protein ligase DTX3L OS=Homo sapiens OX=9606 GN=DTX3L PE=1 SV=1 && PF01661:Macro domain|PF18102:Deltex C-terminal domain|PF13639:Ring finger domain
Cg05386	32.6037	13.4658	28.6057	16.3946	32.2234	- && sp|Q5E9F9|PRS7_BOVIN 26S proteasome regulatory subunit 7 OS=Bos taurus OX=9913 GN=PSMC2 PE=2 SV=3 && PF17862:AAA+ lid domain|PF00004:ATPase family associated with various cellular activities (AAA)
Cg05397	0.532527	1.17818	0.442347	1.19828	0.215638	- && sp|D5FM38|NAS36_BRUMA Zinc metalloproteinase nas-36 OS=Brugia malayi OX=6279 GN=nas-36 PE=1 SV=1 && PF01400:Astacin (Peptidase family M12A)|PF00431:CUB domain
Cg05406	175.207	96.1977	197.269	223.523	186.388	- && sp|P52209|6PGD_HUMAN 6-phosphogluconate dehydrogenase, decarboxylating OS=Homo sapiens OX=9606 GN=PGD PE=1 SV=3 && PF00393:6-phosphogluconate dehydrogenase, C-terminal domain|PF03446:NAD binding domain of 6-phosphogluconate dehydrogenase
Cg05410	6.37652	1.29065	3.07108	2.20448	2.24434	- && sp|Q14667|K0100_HUMAN Protein KIAA0100 OS=Homo sapiens OX=9606 GN=KIAA0100 PE=1 SV=3 && PF10293:Domain of unknown function (DUF2405)|PF10351:Golgi-body localisation protein domain|PF10347:RNA pol II promoter Fmp27 protein domain
Cg05415	1.82155	2.43247	2.06202	1.20441	3.04924	- && sp|Q2KHM9|MOONR_HUMAN Protein moonraker OS=Homo sapiens OX=9606 GN=KIAA0753 PE=1 SV=3 && PF15718:Protein moonraker
Cg05421	153.413	180.147	83.0501	92.1601	93.5516	- && sp|P80177|MIF_BOVIN Macrophage migration inhibitory factor OS=Bos taurus OX=9913 GN=MIF PE=1 SV=6 && PF01187:Macrophage migration inhibitory factor (MIF)
Cg05422	14.7043	6.72696	26.0569	13.0157	17.7784	- && - && -
Cg05428	0.0363506	0.10795	0.0408174	0.396754	0	- && sp|P48542|KCNJ6_MOUSE G protein-activated inward rectifier potassium channel 2 OS=Mus musculus OX=10090 GN=Kcnj6 PE=1 SV=1 && PF17655:Inward rectifier potassium channel C-terminal domain|PF01007:Inward rectifier potassium channel transmembrane domain
Cg05440	2.25352	3.11839	0.504431	110.934	139.7	- && - && -
Cg05447	1.5996	1.77822	0.697951	1.79175	1.16913	- && - && PF12260:Protein-kinase domain of FAM69|PF14875:N-term cysteine-rich ER, FAM69
Cg05505	10.5878	4.95733	11.9051	10.7072	10.9415	- && - && -
Cg05536	5.0865	1.3424	4.15319	4.53951	4.02784	- && - && PF02204:Vacuolar sorting protein 9 (VPS9) domain
Cg05537	14.6056	7.06968	16.2154	11.2968	7.42947	- && - && -
Cg05538	3.76863	4.55982	1.95769	3.64739	3.19132	- && sp|Q5F2F2|ABH15_MOUSE Protein ABHD15 OS=Mus musculus OX=10090 GN=Abhd15 PE=1 SV=1 && PF12146:Serine aminopeptidase, S33
Cg05540	20.1906	36.7784	15.0938	9.54218	17.0227	- && - && -
Cg05543	2.65693	5.86813	1.70867	2.40625	3.1034	- && - && -
Cg05568	1.4088	9.44662	2.1588	17.6937	351.492	- && - && -
Cg05570	4.48583	3.25295	6.77058	5.00013	7.77864	- && sp|Q5ZIE6|ULA1_CHICK NEDD8-activating enzyme E1 regulatory subunit OS=Gallus gallus OX=9031 GN=NAE1 PE=2 SV=1 && PF00899:ThiF family
Cg05576	0.587752	0.599626	0.213102	1.23803	0.208935	- && sp|H2A0L1|TYRO2_PINMG Tyrosinase-like protein 2 OS=Margaritifera margaritifera OX=102329 PE=1 SV=1 && PF00264:Common central domain of tyrosinase
Cg05597	0.0416321	0.09371	0.172278	0.0632577	0.290461	- && - && -
Cg05608	11.8604	5.62789	11.4949	8.90474	8.29857	- && - && PF07525:SOCS box|PF12796:Ankyrin repeats (3 copies)|PF13637:Ankyrin repeats (many copies)
Cg05614	4.2955	5.36551	13.0028	3.59168	5.20765	- && sp|Q6DDL7|UN93A_XENLA Protein unc-93 homolog A OS=Xenopus laevis OX=8355 GN=unc93a PE=2 SV=1 && PF05978:Ion channel regulatory protein UNC-93
Cg05626	37.1292	6.46744	19.8529	28.0568	17.7714	- && sp|Q7ZXF1|MTMR4_XENLA Myotubularin-related protein 4 OS=Xenopus laevis OX=8355 GN=mtmr4 PE=2 SV=1 && PF01363:FYVE zinc finger|PF06602:Myotubularin-like phosphatase domain
Cg05627	8.94047	5.72379	13.834	9.97874	14.3993	- && sp|Q7ZYJ0|TAO1B_XENLA Serine/threonine-protein kinase TAO1-B OS=Xenopus laevis OX=8355 GN=taok1-b PE=2 SV=1 && PF00069:Protein kinase domain|PF12474:Polo kinase kinase
Cg05662	4.27766	0.51526	2.04094	0.87667	4.65881	- && sp|Q5BKL9|CAB45_XENTR 45 kDa calcium-binding protein OS=Xenopus tropicalis OX=8364 GN=sdf4 PE=2 SV=1 && PF13499:EF-hand domain pair
Cg05663	6.87962	3.52674	10.6695	3.28613	2.31159	- && sp|A0A0G2K344|PK3CA_RAT Phosphatidylinositol 4,5-bisphosphate 3-kinase catalytic subunit alpha isoform OS=Rattus norvegicus OX=10116 GN=Pik3ca PE=1 SV=1 && PF00792:Phosphoinositide 3-kinase C2|PF00613:Phosphoinositide 3-kinase family, accessory domain (PIK domain)|PF02192:PI3-kinase family, p85-binding domain|PF00454:Phosphatidylinositol 3- and 4-kinase|PF00794:PI3-kinase family, ras-binding…
Cg05667	7.90965	12.067	4.46114	5.48365	4.67963	- && - && PF01490:Transmembrane amino acid transporter protein
Cg05669	0.386312	1.42999	0.478091	0.304097	0.864435	- && sp|P46088|GST_NOTSL Glutathione S-transferase OS=Nototodarus sloanii OX=215440 PE=1 SV=1 && PF14497:Glutathione S-transferase, C-terminal domain|PF02798:Glutathione S-transferase, N-terminal domain|PF05380:Pao retrotransposon peptidase|PF18701:Family of unknown function (DUF5641)
Cg05673	2.06257	3.30823	1.56201	1.89869	2.2301	- && sp|Q3UZ18|ICE2_MOUSE Little elongation complex subunit 2 OS=Mus musculus OX=10090 GN=Ice2 PE=1 SV=2 && PF10505:NMDA receptor-regulated gene protein 2 C-terminus
Cg05680	3.76649	1.76418	6.54182	3.76017	2.34682	- && - && PF04923:Ninjurin
Cg05684	6.05735	2.58841	3.27255	5.26167	1.77127	- && sp|Q6INE8|VMP1_XENLA Vacuole membrane protein 1 OS=Xenopus laevis OX=8355 GN=vmp1 PE=2 SV=1 && -
Cg05690	1.10525	0.550197	0.968179	0.0442727	6.07845	- && - && -
Cg05691	147.709	54.809	136.95	85.26	26.6918	- && - && PF00668:Condensation domain
Cg05695	1.64856	2.16303	1.09426	0.245592	1.76463	- && sp|P26221|GUN4_THEFU Endoglucanase E-4 OS=Thermobifida fusca OX=2021 GN=celD PE=1 SV=2 && PF00759:Glycosyl hydrolase family 9
Cg05700	1.59439	2.16356	2.12128	0.871272	4.99847	- && - && PF04970:Lecithin retinol acyltransferase
Cg05702	1.75595	5.48841	2.20497	4.86563	3.54543	- && sp|Q13416|ORC2_HUMAN Origin recognition complex subunit 2 OS=Homo sapiens OX=9606 GN=ORC2 PE=1 SV=2 && PF04084:Origin recognition complex subunit 2
Cg05710	0	0	0	0	0.586493	- && - && -
Cg05712	0.367465	0.88622	0.195616	0.0248348	0.226324	- && - && PF00822:PMP-22/EMP/MP20/Claudin family|PF13920:Zinc finger, C3HC4 type (RING finger)
Cg05720	66.0423	45.1442	38.4309	27.9066	56.5923	- && - && PF02221:ML domain
Cg05722	1.92312	4.10707	1.66312	5.27844	6.13256	- && sp|Q5XLR4|BORE1_DANRE Borealin OS=Danio rerio OX=7955 GN=cdca8 PE=2 SV=2 && PF10512:Cell division cycle-associated protein 8
Cg05723	2.58817	0.471512	1.38408	4.00221	3.4024	- && sp|Q62077|PLCG1_MOUSE 1-phosphatidylinositol 4,5-bisphosphate phosphodiesterase gamma-1 OS=Mus musculus OX=10090 GN=Plcg1 PE=1 SV=2 && PF00168:C2 domain|PF00388:Phosphatidylinositol-specific phospholipase C, X domain|PF00018:SH3 domain|PF00387:Phosphatidylinositol-specific phospholipase C, Y domain|PF00017:SH2 domain
Cg05730	3.97251	12.9187	4.03885	20.0731	46.1792	- && sp|Q6IMH0|TEPP_MOUSE Testis, prostate and placenta-expressed protein OS=Mus musculus OX=10090 GN=Tepp PE=2 SV=1 && -
Cg05733	1.27933	2.93463	0.147372	1.2206	0.545119	- && sp|P31582|RAF2A_ARATH Ras-related protein RABF2a OS=Arabidopsis thaliana OX=3702 GN=RABF2A PE=1 SV=1 && PF00071:Ras family
Cg05737	6.91506	9.30379	3.63235	1.89672	2.04298	- && sp|Q32LE4|GGCT_BOVIN Gamma-glutamylcyclotransferase OS=Bos taurus OX=9913 GN=GGCT PE=2 SV=1 && PF13772:AIG2-like family
Cg05739	5.70558	20.0888	4.75225	13.1561	6.53548	- && sp|Q2HJF3|ORC6_BOVIN Origin recognition complex subunit 6 OS=Bos taurus OX=9913 GN=ORC6 PE=2 SV=1 && PF05460:Origin recognition complex subunit 6 (ORC6)
Cg05759	0.445167	0.372894	1.63149	0.465116	0.446116	- && sp|Q61391|NEP_MOUSE Neprilysin OS=Mus musculus OX=10090 GN=Mme PE=1 SV=3 && PF05649:Peptidase family M13|PF01431:Peptidase family M13
Cg05765	1.7427	4.09238	1.30577	1.50366	1.55439	- && sp|Q9QYS2|GRM3_MOUSE Metabotropic glutamate receptor 3 OS=Mus musculus OX=10090 GN=Grm3 PE=1 SV=1 && PF01094:Receptor family ligand binding region|PF00003:7 transmembrane sweet-taste receptor of 3 GCPR
Cg05767	16.3104	44.8504	17.8843	28.6181	22.566	- && sp|Q9W704|RIPA_XENLA RPA-interacting protein A OS=Xenopus laevis OX=8355 GN=rpain-a PE=1 SV=1 && PF14766:Replication protein A interacting N-terminal|PF14768:Replication protein A interacting C-terminal
Cg05820	1.74022	3.16673	3.17473	4.73176	1.6805	- && sp|Q6DGR4|HGH1_DANRE Protein HGH1 homolog OS=Danio rerio OX=7955 GN=hgh1 PE=2 SV=1 && PF04063:Domain of unknown function (DUF383)|PF04064:Domain of unknown function (DUF384)
Cg05830	53.6785	18.1416	38.7081	24.8779	23.2884	- && sp|Q9DB30|PHKG2_MOUSE Phosphorylase b kinase gamma catalytic chain, liver/testis isoform OS=Mus musculus OX=10090 GN=Phkg2 PE=2 SV=2 && PF00069:Protein kinase domain
Cg05836	0.526462	0.517506	0.248465	3.28159	19.8907	- && - && -
Cg05841	0.0185281	0.0603472	0	0.796592	23.2181	- && sp|Q8N4B4|FBX39_HUMAN F-box only protein 39 OS=Homo sapiens OX=9606 GN=FBXO39 PE=1 SV=1 && PF12937:F-box-like
Cg05846	1.72834	1.3367	0.226015	1.86447	0.746964	- && - && -
Cg05847	0.548519	1.647	8.60911	2.40883	1.62825	- && sp|Q8NBI5|S43A3_HUMAN Solute carrier family 43 member 3 OS=Homo sapiens OX=9606 GN=SLC43A3 PE=1 SV=2 && -
Cg05856	4.71713	3.29323	2.20502	0.860944	4.95569	- && sp|Q071E0|KT5AA_DANRE N-lysine methyltransferase KMT5A-A OS=Danio rerio OX=7955 GN=kmt5aa PE=2 SV=1 && PF00856:SET domain
Cg05857	9.62385	4.6778	9.74459	7.26513	7.23669	- && sp|Q9Y6I7|WSB1_HUMAN WD repeat and SOCS box-containing protein 1 OS=Homo sapiens OX=9606 GN=WSB1 PE=1 SV=1 && PF07525:SOCS box|PF00400:WD domain, G-beta repeat
Cg05862	2.13321	0.477466	2.16559	1.62634	2.08741	- && sp|Q6IDD9|SARM1_DROME NAD(+) hydrolase sarm1 OS=Drosophila melanogaster OX=7227 GN=Sarm PE=1 SV=1 && -
Cg05903	7.32848	13.0294	5.06325	36.8077	32.0388	- && sp|Q5PPV3|MORN3_XENLA MORN repeat-containing protein 3 OS=Xenopus laevis OX=8355 GN=morn3 PE=2 SV=1 && PF02493:MORN repeat
Cg05906	36.8535	13.9563	32.2596	27.7203	35.778	- && sp|O13016|PTN1_CHICK Tyrosine-protein phosphatase non-receptor type 1 OS=Gallus gallus OX=9031 GN=PTPN1 PE=1 SV=1 && PF00102:Protein-tyrosine phosphatase
Cg05922	24.204	51.7764	16.2564	42.0598	38.6283	- && sp|Q58CS6|IFT20_BOVIN Intraflagellar transport protein 20 homolog OS=Bos taurus OX=9913 GN=IFT20 PE=2 SV=1 && PF14931:Intraflagellar transport complex B, subunit 20
Cg05926	5.88136	15.4283	7.27002	6.87685	8.53084	- && - && PF00100:Zona pellucida-like domain
Cg05927	0.874559	1.70125	0.423924	1.16751	2.95283	- && - && -
Cg05941	76.5154	113.677	27.0094	40.0989	56.1778	- && sp|P0C551|PA2A_BUNFA Acidic phospholipase A2 KBf-grIB (Fragment) OS=Bungarus fasciatus OX=8613 PE=2 SV=1 && PF00068:Phospholipase A2
Cg05957	6.41892	8.70178	11.6977	2.41779	10.9234	- && sp|P86952|TYRO_PINMA Tyrosinase-like protein OS=Pinctada maxima OX=104660 PE=1 SV=1 && PF00264:Common central domain of tyrosinase
Cg05968	17.3162	12.8533	8.38446	5.6371	17.226	- && sp|P24369|PPIB_MOUSE Peptidyl-prolyl cis-trans isomerase B OS=Mus musculus OX=10090 GN=Ppib PE=1 SV=2 && PF00160:Cyclophilin type peptidyl-prolyl cis-trans isomerase/CLD
Cg05982	2.43344	3.99698	0.913493	1.2958	0.986625	- && sp|O43825|B3GT2_HUMAN Beta-1,3-galactosyltransferase 2 OS=Homo sapiens OX=9606 GN=B3GALT2 PE=1 SV=1 && PF01762:Galactosyltransferase
Cg06020	27.6888	4.99352	39.8371	22.6404	32.5008	- && sp|D3YXG0|HMCN1_MOUSE Hemicentin-1 OS=Mus musculus OX=10090 GN=Hmcn1 PE=1 SV=1 && PF00090:Thrombospondin type 1 domain|PF00092:von Willebrand factor type A domain|PF00057:Low-density lipoprotein receptor domain class A|PF00530:Scavenger receptor cysteine-rich domain
Cg06021	1.53869	0.879968	0.0790776	0.494347	0.622946	- && - && -
Cg06025	1.13742	0.459268	0.674598	0.943593	3.56593	- && sp|Q5G265|NETR_SAGLB Neurotrypsin OS=Saguinus labiatus OX=78454 GN=PRSS12 PE=3 SV=1 && PF00092:von Willebrand factor type A domain|PF00530:Scavenger receptor cysteine-rich domain
Cg06034	0.0154412	1.86637	0.704628	2.39651	14.6128	- && sp|P17644|ACH2_DROME Acetylcholine receptor subunit alpha-like 2 OS=Drosophila melanogaster OX=7227 GN=nAChRalpha2 PE=2 SV=1 && PF02932:Neurotransmitter-gated ion-channel transmembrane region|PF02931:Neurotransmitter-gated ion-channel ligand binding domain
Cg06048	3.21109	0.849041	3.02389	2.75383	3.61376	- && sp|Q9NRH2|SNRK_HUMAN SNF-related serine/threonine-protein kinase OS=Homo sapiens OX=9606 GN=SNRK PE=1 SV=2 && PF00069:Protein kinase domain
Cg06051	37.5363	11.4388	25.7568	31.1582	34.1732	- && sp|Q9DBM1|GPTC1_MOUSE G patch domain-containing protein 1 OS=Mus musculus OX=10090 GN=Gpatch1 PE=2 SV=1 && PF02494:HYR domain|PF01585:G-patch domain|PF00058:Low-density lipoprotein receptor repeat class B|PF07713:Protein of unknown function (DUF1604)
Cg06066	0.908793	2.59739	0.919413	0.586776	2.12434	- && - && PF02992:Transposase family tnp2|PF13960:Domain of unknown function (DUF4218)
Cg06098	28.2346	41.9658	11.8545	30.8941	22.7328	- && sp|Q5I0P2|GCSH_RAT Glycine cleavage system H protein, mitochondrial OS=Rattus norvegicus OX=10116 GN=Gcsh PE=2 SV=1 && PF01597:Glycine cleavage H-protein
Cg06107	0	0.29547	0.0163546	0	0.304644	- && - && PF14291:Domain of unknown function (DUF4371)
Cg06129	21.6375	13.5881	26.5881	19.4622	23.7289	- && sp|Q2HJG5|VPS35_BOVIN Vacuolar protein sorting-associated protein 35 OS=Bos taurus OX=9913 GN=VPS35 PE=2 SV=1 && PF03635:Vacuolar protein sorting-associated protein 35
Cg06132	2.87614	4.40414	1.74736	10.767	11.527	- && sp|Q9NUD7|CT096_HUMAN Uncharacterized protein C20orf96 OS=Homo sapiens OX=9606 GN=C20orf96 PE=2 SV=2 && PF15397:Domain of unknown function (DUF4618)
Cg06149	4.02655	1.84312	2.05236	5.86205	1.75157	- && - && -
Cg06150	48.2964	86.3108	40.8466	246.968	279.945	- && sp|Q6B857|CFA20_BOVIN Cilia- and flagella-associated protein 20 OS=Bos taurus OX=9913 GN=CFAP20 PE=2 SV=1 && PF05018:Protein of unknown function (DUF667)
Cg06171	0.135566	0.905722	0.553999	2.19234	0.580945	- && sp|Q00438|PTBP1_RAT Polypyrimidine tract-binding protein 1 OS=Rattus norvegicus OX=10116 GN=Ptbp1 PE=1 SV=1 && PF00076:RNA recognition motif. (a.k.a. RRM, RBD, or RNP domain)|PF13893:RNA recognition motif. (a.k.a. RRM, RBD, or RNP domain)
Cg06174	0.0471325	2.33212	0.303984	0.447464	0.499934	- && sp|P24862|CCNB_PATVU G2/mitotic-specific cyclin-B OS=Patella vulgata OX=6465 PE=2 SV=1 && PF02984:Cyclin, C-terminal domain|PF00134:Cyclin, N-terminal domain
Cg06178	5.09777	7.87295	1.84211	2.08258	1.75227	- && - && PF00050:Kazal-type serine protease inhibitor domain
Cg06182	1.13978	0.404448	2.87205	0.496188	0.191235	- && sp|P55043|RAD_RAT GTP-binding protein RAD OS=Rattus norvegicus OX=10116 GN=Rrad PE=2 SV=2 && PF00071:Ras family
Cg06186	350.917	539.989	143.386	48.5454	30.9739	- && - && -
Cg06208	5.36733	15.4026	4.34622	1.58341	1.79691	- && sp|P80003|PA2A2_HELSU Acidic phospholipase A2 PA4 OS=Heloderma suspectum OX=8554 PE=1 SV=2 && PF05826:Phospholipase A2
Cg06221	4.34891	3.22185	30.643	4.67914	4.44914	- && - && -
Cg06226	4.43566	2.75455	7.93573	1.18785	2.03318	- && sp|P17972|KCNAW_DROME Potassium voltage-gated channel protein Shaw OS=Drosophila melanogaster OX=7227 GN=Shaw PE=2 SV=1 && PF02214:BTB/POZ domain|PF00520:Ion transport protein
Cg06227	0	0.0890616	0.0807361	1.66957	12.3872	- && sp|P17972|KCNAW_DROME Potassium voltage-gated channel protein Shaw OS=Drosophila melanogaster OX=7227 GN=Shaw PE=2 SV=1 && PF00520:Ion transport protein|PF02214:BTB/POZ domain
Cg06248	0.931399	1.89244	1.18494	0.734159	2.56777	- && sp|A4FU69|EFCB5_HUMAN EF-hand calcium-binding domain-containing protein 5 OS=Homo sapiens OX=9606 GN=EFCAB5 PE=1 SV=3 && -
Cg06261	8.90893	4.4083	9.83708	2.14286	1.22045	- && - && PF05721:Phytanoyl-CoA dioxygenase (PhyH)
Cg06267	0.313727	0.974922	0.197401	0.814967	0.46802	- && - && -
Cg06289	15.0921	45.5777	21.4968	40.7852	9.19788	- && sp|Q9PVW8|SAL_SILAS Rhamnose-binding lectin OS=Silurus asotus OX=30991 PE=1 SV=1 && PF02140:Galactose binding lectin domain
Cg06290	0.139539	1.55889	0	0	0.216292	- && sp|C0HK23|SML_SCONI L-rhamnose-binding lectin SML OS=Scomberomorus niphonius OX=321164 PE=1 SV=1 && PF02140:Galactose binding lectin domain
Cg06292	11.6297	19.9487	11.5415	20.5277	4.90534	- && sp|P86179|CSL3_ONCKE L-rhamnose-binding lectin CSL3 OS=Oncorhynchus keta OX=8018 PE=1 SV=1 && PF02140:Galactose binding lectin domain
Cg06301	0.499136	1.95148	0.62384	0.736104	4.35121	- && sp|A6NE52|WDR97_HUMAN WD repeat-containing protein 97 OS=Homo sapiens OX=9606 GN=WDR97 PE=2 SV=2 && PF03999:Microtubule associated protein (MAP65/ASE1 family)
Cg06304	30.5359	27.5111	55.8491	56.0524	98.8645	- && - && PF04749:PLAC8 family
Cg06311	13.0627	23.2602	9.47015	2.98469	3.14129	- && - && PF04749:PLAC8 family
Cg06313	26.2192	44.9497	17.8486	32.4361	19.3995	- && - && PF07978:NIPSNAP
Cg06355	337.712	119.56	364.734	144.492	213.287	- && sp|P22757|HE_PARLI Hatching enzyme OS=Paracentrotus lividus OX=7656 PE=1 SV=1 && PF00413:Matrixin|PF00045:Hemopexin
Cg06368	20.6742	24.9971	78.3443	31.3759	9.42281	- && sp|P82251|BAT1_HUMAN b(0,+)-type amino acid transporter 1 OS=Homo sapiens OX=9606 GN=SLC7A9 PE=1 SV=1 && PF13520:Amino acid permease
Cg06374	0	0	0.60739	1.92248	0.119463	- && sp|Q58D72|ATLA1_BOVIN Atlastin-1 OS=Bos taurus OX=9913 GN=ATL1 PE=2 SV=2 && PF02263:Guanylate-binding protein, N-terminal domain
Cg06385	6.86334	4.71397	9.58065	5.61926	9.82156	- && sp|Q8CCN5|BCAS3_MOUSE BCAS3 microtubule associated cell migration factor OS=Mus musculus OX=10090 GN=Bcas3 PE=1 SV=2 && PF12490:Breast carcinoma amplified sequence 3
Cg06400	4.05062	2.28724	8.59824	4.23769	3.17402	- && sp|Q9N294|B3GT5_PANPA Beta-1,3-galactosyltransferase 5 (Fragment) OS=Pan paniscus OX=9597 GN=B3GALT5 PE=3 SV=1 && PF01762:Galactosyltransferase
Cg06403	6.43219	9.79575	3.14307	9.55455	12.8012	- && - && PF14735:HAUS augmin-like complex subunit 4
Cg06404	0	0.0421114	0	0	9.88492	- && sp|Q96LI6|HSFY1_HUMAN Heat shock transcription factor, Y-linked OS=Homo sapiens OX=9606 GN=HSFY1 PE=1 SV=1 && PF00447:HSF-type DNA-binding
Cg06442	51.7309	97.3645	52.4215	160.029	435.941	- && - && PF00811:Ependymin
Cg06444	392.123	504.53	227.7	475.767	1265.7	- && - && PF00811:Ependymin
Cg06453	0.0379936	0	0	0.579786	0	- && - && PF00643:B-box zinc finger
Cg06473	2.68217	8.73125	4.09488	2.5577	8.01564	- && sp|Q3SZH6|TTLL9_BOVIN Probable tubulin polyglutamylase TTLL9 OS=Bos taurus OX=9913 GN=TTLL9 PE=2 SV=1 && PF03133:Tubulin-tyrosine ligase family
Cg06491	0.142368	0.581505	0.368158	1.115	18.0906	- && - && PF07496:CW-type Zinc Finger
Cg06493	0.104839	0	0.46413	0.155136	0.364179	- && sp|Q8K4Q8|COL12_MOUSE Collectin-12 OS=Mus musculus OX=10090 GN=Colec12 PE=1 SV=1 && PF00059:Lectin C-type domain
Cg06496	0.587882	0.239183	0.659581	0.200646	1.85121	- && sp|Q53H47|SETMR_HUMAN Histone-lysine N-methyltransferase SETMAR OS=Homo sapiens OX=9606 GN=SETMAR PE=1 SV=2 && PF01359:Transposase (partial DDE domain)
Cg06497	1.25596	0.682037	0.388354	0.336419	2.40842	- && - && -
Cg06499	32.7816	27.5877	145.997	163.326	205.629	- && - && PF00811:Ependymin
Cg06504	7.81863	16.1505	15.7493	7.40233	21.1907	- && sp|Q9W436|NEP_DROME Neprilysin-1 OS=Drosophila melanogaster OX=7227 GN=Nep1 PE=2 SV=2 && PF05649:Peptidase family M13|PF01431:Peptidase family M13
Cg06506	1.09829	3.60515	0.265146	0.317567	1.18339	- && sp|P26221|GUN4_THEFU Endoglucanase E-4 OS=Thermobifida fusca OX=2021 GN=celD PE=1 SV=2 && PF00759:Glycosyl hydrolase family 9
Cg06517	3.03135	4.67607	1.96055	5.51541	4.21392	- && sp|O15995|CCNE_HEMPU G1/S-specific cyclin-E OS=Hemicentrotus pulcherrimus OX=7650 GN=CYCE PE=2 SV=1 && PF02984:Cyclin, C-terminal domain|PF00134:Cyclin, N-terminal domain
Cg06574	4.55085	8.64975	3.65164	6.44322	4.28103	- && - && PF05050:Methyltransferase FkbM domain
Cg06614	20.2959	22.9039	51.6511	13.7699	6.31753	- && sp|A8WGA0|C27C1_DANRE Cytochrome P450 27C1 OS=Danio rerio OX=7955 GN=cyp27c1 PE=1 SV=2 && PF00067:Cytochrome P450
Cg06623	2.31765	1.20824	3.06754	1.52753	1.18518	- && sp|Q7KVW5|KCNN_DROME Small conductance calcium-activated potassium channel protein OS=Drosophila melanogaster OX=7227 GN=SK PE=2 SV=2 && PF02888:Calmodulin binding domain|PF03530:Calcium-activated SK potassium channel|PF07885:Ion channel
Cg06645	0.660439	0.366555	0.518331	0.943048	2.83089	- && sp|Q9GYZ0|KIF15_STRPU Kinesin-like protein KIF15 OS=Strongylocentrotus purpuratus OX=7668 GN=KIF15 PE=1 SV=1 && PF00225:Kinesin motor domain
Cg06648	54.4462	21.4364	85.9528	35.6823	32.4235	- && sp|Q99L04|DHRS1_MOUSE Dehydrogenase/reductase SDR family member 1 OS=Mus musculus OX=10090 GN=Dhrs1 PE=1 SV=1 && PF00106:short chain dehydrogenase
Cg06649	0.114365	0	0.0314289	0.186452	0	- && sp|Q9BYK8|HELZ2_HUMAN Helicase with zinc finger domain 2 OS=Homo sapiens OX=9606 GN=HELZ2 PE=1 SV=6 && PF13087:AAA domain|PF13086:AAA domain|PF00773:RNB domain
Cg06708	0.21286	0	0.50816	0.0668982	0.064799	- && - && -
Cg06737	18.4665	27.7273	35.3324	28.5418	71.5153	- && sp|B3EWY8|SAAR2_ACRMI Skeletal aspartic acid-rich protein 2 (Fragment) OS=Acropora millepora OX=45264 PE=1 SV=1 && -
Cg06752	25.7873	21.7563	5.86694	6.4595	19.2024	- && - && -
Cg06755	5.01335	7.41211	2.6828	2.08513	3.54551	- && - && -
Cg06764	6.7639	6.31393	12.494	4.58721	3.05415	- && sp|Q96GA7|SDSL_HUMAN Serine dehydratase-like OS=Homo sapiens OX=9606 GN=SDSL PE=1 SV=1 && PF00291:Pyridoxal-phosphate dependent enzyme
Cg06767	1.25694	2.73807	0.97379	1.78095	2.59807	- && sp|Q8I7Z8|HAM_DROME Transcription factor hamlet OS=Drosophila melanogaster OX=7227 GN=ham PE=2 SV=1 && PF00096:Zinc finger, C2H2 type
Cg06771	10.409	4.91712	18.39	14.1256	19.193	- && sp|Q0VD32|CRBL2_BOVIN cAMP-responsive element-binding protein-like 2 OS=Bos taurus OX=9913 GN=CREBL2 PE=1 SV=1 && -
Cg06775	0.61538	0.493467	0.220126	1.06661	0.0212148	- && - && PF13472:GDSL-like Lipase/Acylhydrolase family
Cg06780	14.1248	6.06607	13.7135	4.48292	4.41944	- && sp|O95395|GCNT3_HUMAN Beta-1,3-galactosyl-O-glycosyl-glycoprotein beta-1,6-N-acetylglucosaminyltransferase 3 OS=Homo sapiens OX=9606 GN=GCNT3 PE=2 SV=1 && PF02485:Core-2/I-Branching enzyme
Cg06786	5.94649	5.4322	12.121	7.71419	11.0329	- && sp|Q7K556|TTD14_DROME TRPL translocation defect protein 14 OS=Drosophila melanogaster OX=7227 GN=Ttd14 PE=1 SV=1 && PF13521:AAA domain
Cg06787	0.712279	3.08175	0.635798	0.970149	0.722206	- && - && -
Cg06788	9.04904	2.4331	6.48187	7.80643	6.9991	- && sp|P32865|GPRK1_DROME G protein-coupled receptor kinase 1 OS=Drosophila melanogaster OX=7227 GN=Gprk1 PE=2 SV=2 && PF00615:Regulator of G protein signaling domain|PF00069:Protein kinase domain
Cg06804	0.430994	0.221819	0.813378	0.0588272	0.508556	- && sp|P05186|PPBT_HUMAN Alkaline phosphatase, tissue-nonspecific isozyme OS=Homo sapiens OX=9606 GN=ALPL PE=1 SV=4 && PF00245:Alkaline phosphatase
Cg06807	7.61705	3.39379	10.7491	8.0499	8.10412	- && sp|B7ZRM8|EVI1B_XENLA MDS1 and EVI1 complex locus protein EVI1-B OS=Xenopus laevis OX=8355 GN=mecom-b PE=2 SV=1 && PF00096:Zinc finger, C2H2 type
Cg06837	0.89384	1.01884	0.414992	1.82235	2.06179	- && sp|Q91437|PYR1_SQUAC CAD protein OS=Squalus acanthias OX=7797 GN=CAD PE=2 SV=1 && PF01979:Amidohydrolase family|PF02142:MGS-like domain|PF00117:Glutamine amidotransferase class-I|PF02787:Carbamoyl-phosphate synthetase large chain, oligomerisation domain|PF00988:Carbamoyl-phosphate synthase small chain, CPSase domain|PF02786:Carbamoyl-phosphate synthase L chain, ATP binding domain|PF02729:Asp…
Cg06855	393.345	210.873	452.952	270.784	235.52	- && sp|Q62737|CY24A_RAT Cytochrome b-245 light chain OS=Rattus norvegicus OX=10116 GN=Cyba PE=1 SV=3 && PF05038:Cytochrome Cytochrome b558 alpha-subunit
Cg06877	1.28778	0.647412	0.629139	0.0433338	0.910427	- && - && -
Cg06895	1.86979	1.72517	6.95823	0.0832425	0.212477	- && - && -
Cg06897	0.409755	0.0367831	0.327123	0.761486	0	- && - && -
Cg06901	0.21036	1.28933	0.164061	1.33841	0.811137	- && sp|A3KPP4|S2535_DANRE Solute carrier family 25 member 35 OS=Danio rerio OX=7955 GN=slc25a35 PE=2 SV=1 && PF00153:Mitochondrial carrier protein
Cg06903	0.323215	0	1.21145	0.243651	3.06499	- && - && -
Cg06921	0.414424	0.172466	0.135507	0.0146437	0.275495	- && sp|P22758|TGM1_RABIT Protein-glutamine gamma-glutamyltransferase K OS=Oryctolagus cuniculus OX=9986 GN=TGM1 PE=2 SV=2 && PF00868:Transglutaminase family|PF00927:Transglutaminase family, C-terminal ig like domain|PF01841:Transglutaminase-like superfamily
Cg06942	10.9378	26.6142	9.05166	32.0414	24.2625	- && sp|Q9Y248|PSF2_HUMAN DNA replication complex GINS protein PSF2 OS=Homo sapiens OX=9606 GN=GINS2 PE=1 SV=1 && PF05916:GINS complex protein
Cg06943	8.14164	3.65512	8.11015	10.2357	10.5654	- && - && PF12540:Protein of unknown function (DUF3736)
Cg06950	11.1649	9.64187	18.8605	9.8217	11.935	- && sp|P07686|HEXB_HUMAN Beta-hexosaminidase subunit beta OS=Homo sapiens OX=9606 GN=HEXB PE=1 SV=3 && PF14845:beta-acetyl hexosaminidase like|PF00728:Glycosyl hydrolase family 20, catalytic domain
Cg06961	29.6387	5.50937	14.6628	20.1748	17.8018	- && sp|Q5BKC9|NGEF_RAT Ephexin-1 OS=Rattus norvegicus OX=10116 GN=Ngef PE=1 SV=2 && PF00018:SH3 domain|PF00621:RhoGEF domain|PF00169:PH domain
Cg06974	6.68305	3.04945	6.17821	5.31513	4.63815	- && sp|A1A4J6|ATP9B_BOVIN Probable phospholipid-transporting ATPase IIB OS=Bos taurus OX=9913 GN=ATP9B PE=2 SV=1 && PF16212:Phospholipid-translocating P-type ATPase C-terminal|PF00122:E1-E2 ATPase|PF13246:Cation transport ATPase (P-type)|PF16209:Phospholipid-translocating ATPase N-terminal
Cg06986	104.826	43.2267	117.38	81.8815	107.607	- && sp|Q5XGP7|SKA2A_XENLA Src kinase-associated phosphoprotein 2-A OS=Xenopus laevis OX=8355 GN=skap2-a PE=2 SV=1 && PF00169:PH domain|PF00018:SH3 domain
Cg06987	1.28731	1.96382	5.50353	6.85243	0.539827	- && sp|P48148|RHO1_DROME Ras-like GTP-binding protein Rho1 OS=Drosophila melanogaster OX=7227 GN=Rho1 PE=1 SV=1 && PF00071:Ras family
Cg06988	0.876102	2.89511	4.63565	18.7062	1.71231	- && sp|Q22038|RHO1_CAEEL Ras-like GTP-binding protein rhoA OS=Caenorhabditis elegans OX=6239 GN=rho-1 PE=1 SV=1 && PF00071:Ras family
Cg07012	0.11326	1.25488	0.123111	0.62791	0.236853	- && - && -
Cg07013	0.793495	0.0807163	1.13783	1.71976	0.771473	- && sp|O61366|GPRS_DROME Serine-enriched protein OS=Drosophila melanogaster OX=7227 GN=gprs PE=4 SV=3 && PF00651:BTB/POZ domain
Cg07037	2.28177	0.498937	1.87393	0.685634	0.871406	- && - && -
Cg07048	0	0.642101	0	0.112942	0.376475	- && - && -
Cg07067	1.49561	0.146075	5.83264	0.622708	0	- && - && -
Cg07079	35.8366	19.708	45.7393	26.8489	11.7378	- && sp|Q98943|CASP2_CHICK Caspase-2 OS=Gallus gallus OX=9031 GN=CASP2 PE=2 SV=2 && PF00656:Caspase domain
Cg07088	14.1282	3.30052	8.81862	11.3221	10.9248	- && - && PF02174:PTB domain (IRS-1 type)
Cg07099	1.26152	4.68837	1.54648	4.91665	5.23579	- && sp|Q1T7B9|CENPM_CHICK Centromere protein M OS=Gallus gallus OX=9031 GN=CENPM PE=1 SV=1 && PF11111:Centromere protein M (CENP-M)
Cg07101	5.48502	4.52363	5.28674	3.51165	9.40603	- && sp|A4Q9F3|TTL10_MOUSE Protein polyglycylase TTLL10 OS=Mus musculus OX=10090 GN=Ttll10 PE=1 SV=1 && PF03133:Tubulin-tyrosine ligase family
Cg07105	1.20189	0.300365	2.38114	2.09631	1.11281	- && sp|P19357|GLUT4_RAT Solute carrier family 2, facilitated glucose transporter member 4 OS=Rattus norvegicus OX=10116 GN=Slc2a4 PE=1 SV=1 && PF00083:Sugar (and other) transporter
Cg07122	1.48351	0.452326	2.596	1.38948	4.4735	- && sp|Q6GNT2|SPRNG_XENLA SREBP regulating gene protein OS=Xenopus laevis OX=8355 GN=spring1 PE=2 SV=1 && PF10218:Uncharacterized conserved protein (DUF2054)
Cg07125	0.445698	2.41499	0.375438	0	0.632804	- && - && -
Cg07128	6.75356	4.00032	4.64105	2.89794	9.52977	- && sp|Q2M385|MPEG1_HUMAN Macrophage-expressed gene 1 protein OS=Homo sapiens OX=9606 GN=MPEG1 PE=1 SV=1 && PF01823:MAC/Perforin domain
Cg07129	17.579	35.7317	14.2616	34.9903	33.0161	- && - && PF05721:Phytanoyl-CoA dioxygenase (PhyH)
Cg07130	28.214	4.92779	15.4038	32.8978	24.6757	- && sp|O00329|PK3CD_HUMAN Phosphatidylinositol 4,5-bisphosphate 3-kinase catalytic subunit delta isoform OS=Homo sapiens OX=9606 GN=PIK3CD PE=1 SV=2 && PF02192:PI3-kinase family, p85-binding domain|PF00613:Phosphoinositide 3-kinase family, accessory domain (PIK domain)|PF00794:PI3-kinase family, ras-binding domain|PF00792:Phosphoinositide 3-kinase C2|PF00454:Phosphatidylinositol 3- and 4-kinase
Cg07133	8.72372	5.91671	16.6507	0.311502	0.689984	- && - && -
Cg07139	22.161	10.5841	21.412	13.7457	21.4932	- && sp|Q5EBF8|ATRAP_XENTR Type-1 angiotensin II receptor-associated protein-like OS=Xenopus tropicalis OX=8364 GN=agtrap PE=2 SV=1 && PF06396:Angiotensin II, type I receptor-associated protein (AGTRAP)
Cg07140	14.9723	17.1965	19.8776	5.95888	12.417	- && - && PF00001:7 transmembrane receptor (rhodopsin family)
Cg07150	7.09692	3.98892	9.50419	5.82246	7.16677	- && sp|Q99MP8|BRAP_MOUSE BRCA1-associated protein OS=Mus musculus OX=10090 GN=Brap PE=1 SV=1 && PF13639:Ring finger domain|PF07576:BRCA1-associated protein 2|PF02148:Zn-finger in ubiquitin-hydrolases and other protein
Cg07168	21.0705	44.2177	104.634	40.476	17.8631	- && - && PF08718:Glycolipid transfer protein (GLTP)
Cg07174	0	0.126157	0.437848	0.29914	6.66617	- && - && -
Cg07180	66.4828	27.6115	101.028	56.4343	65.4137	- && sp|Q9UH65|SWP70_HUMAN Switch-associated protein 70 OS=Homo sapiens OX=9606 GN=SWAP70 PE=1 SV=1 && PF00169:PH domain
Cg07187	8.59289	3.92811	16.5627	5.24223	3.07293	- && sp|Q18161|YBPT_CAEEL UPF0046 protein C25E10.12 OS=Caenorhabditis elegans OX=6239 GN=C25E10.12 PE=3 SV=1 && PF00149:Calcineurin-like phosphoesterase
Cg07188	2.1913	0.956763	0.480695	0.126735	1.5338	- && - && -
Cg07190	2.46369	2.73931	8.15049	2.41331	1.79843	- && sp|P16591|FER_HUMAN Tyrosine-protein kinase Fer OS=Homo sapiens OX=9606 GN=FER PE=1 SV=2 && PF07714:Protein tyrosine and serine/threonine kinase|PF00643:B-box zinc finger|PF00017:SH2 domain
Cg07191	3.7013	0.990687	5.37325	4.11486	1.51896	- && sp|P18106|FER_DROME Tyrosine-protein kinase Fer OS=Drosophila melanogaster OX=7227 GN=FER PE=1 SV=3 && PF00017:SH2 domain|PF07714:Protein tyrosine and serine/threonine kinase|PF00643:B-box zinc finger
Cg07205	25.8375	36.9453	92.3224	30.0223	37.9297	- && - && -
Cg07221	0.639937	5.83906	0.924487	0	0.249051	- && - && -
Cg07226	20.487	26.7656	11.1044	8.8105	13.6836	- && sp|Q6NT55|CP4FN_HUMAN Cytochrome P450 4F22 OS=Homo sapiens OX=9606 GN=CYP4F22 PE=1 SV=1 && PF00067:Cytochrome P450
Cg07246	1.00926	0.417394	0.585381	1.46394	0.200789	- && - && -
Cg07269	1.23694	0.388029	1.24371	1.5754	1.39222	- && - && PF12260:Protein-kinase domain of FAM69
Cg07280	1.93751	12.7584	0.586926	6.66447	1.70761	- && - && PF00147:Fibrinogen beta and gamma chains, C-terminal globular domain
Cg07283	0	1.83841	0.0761938	0.686654	0.199493	- && sp|Q24K15|ANGP4_BOVIN Angiopoietin-4 OS=Bos taurus OX=9913 GN=ANGPT4 PE=2 SV=1 && PF00147:Fibrinogen beta and gamma chains, C-terminal globular domain
Cg07290	16.4071	5.11988	14.5727	24.7893	18.4529	- && sp|A5D6U8|ACP7_DANRE Acid phosphatase type 7 OS=Danio rerio OX=7955 GN=acp7 PE=2 SV=1 && PF00149:Calcineurin-like phosphoesterase|PF14008:Iron/zinc purple acid phosphatase-like protein C|PF16656:Purple acid Phosphatase, N-terminal domain
Cg07294	7.15459	4.65853	1.19591	5.33036	7.46781	- && sp|Q00546|TENR_CHICK Tenascin-R OS=Gallus gallus OX=9031 GN=TNR PE=1 SV=1 && PF00147:Fibrinogen beta and gamma chains, C-terminal globular domain
Cg07298	0.966643	0.193182	0.234257	0	1.06323	- && - && -
Cg07305	0	0.238096	0	0	0.0154269	- && sp|E9PTA2|TRPM2_RAT Transient receptor potential cation channel subfamily M member 2 OS=Rattus norvegicus OX=10116 GN=Trpm2 PE=1 SV=3 && PF18139:SLOG in TRPM|PF00520:Ion transport protein
Cg07322	1.90524	1.06862	0.449416	4.23015	0.975297	- && - && -
Cg07325	2.09047	2.68969	3.12781	5.45681	1.17917	- && sp|Q9VCA2|ORCT_DROME Organic cation transporter protein OS=Drosophila melanogaster OX=7227 GN=Orct PE=1 SV=1 && PF00083:Sugar (and other) transporter
Cg07327	0.390142	1.09327	0.190973	0.0123466	0.275666	- && sp|Q9VCA2|ORCT_DROME Organic cation transporter protein OS=Drosophila melanogaster OX=7227 GN=Orct PE=1 SV=1 && PF00083:Sugar (and other) transporter
Cg07353	8.00441	9.62828	12.1229	7.23016	19.4458	- && - && -
Cg07370	0.291324	1.2416	0	0	0.052734	- && sp|A9ULZ2|BIR7B_XENLA Baculoviral IAP repeat-containing protein 7-B OS=Xenopus laevis OX=8355 GN=birc7-b PE=2 SV=2 && PF13920:Zinc finger, C3HC4 type (RING finger)
Cg07409	0.512224	0.0920213	1.24193	0.326382	5.65744	- && - && -
Cg07433	0	0.112164	0.0839931	0.0112749	0.276987	- && sp|Q9UGM3|DMBT1_HUMAN Deleted in malignant brain tumors 1 protein OS=Homo sapiens OX=9606 GN=DMBT1 PE=1 SV=2 && PF01825:GPCR proteolysis site, GPS, motif|PF16489:GPCR-Autoproteolysis INducing (GAIN) domain|PF00530:Scavenger receptor cysteine-rich domain|PF02793:Hormone receptor domain|PF07679:Immunoglobulin I-set domain|PF00002:7 transmembrane receptor (Secretin family)
Cg07447	0.338446	0.199874	0.104827	0	0.635569	- && sp|Q8N118|CP4X1_HUMAN Cytochrome P450 4X1 OS=Homo sapiens OX=9606 GN=CYP4X1 PE=1 SV=1 && PF00067:Cytochrome P450
Cg07448	0.338436	0.323954	2.34024	0.337892	0.801224	- && sp|Q8N118|CP4X1_HUMAN Cytochrome P450 4X1 OS=Homo sapiens OX=9606 GN=CYP4X1 PE=1 SV=1 && PF00067:Cytochrome P450
Cg07466	0.0624107	0.171619	0.00784714	0	0	- && - && -
Cg07488	58.692	98.2747	29.1421	49.8725	21.0152	- && sp|Q38717|RNS4_ANTHI Ribonuclease S-4 OS=Antirrhinum hispanicum OX=49039 GN=S4 PE=2 SV=1 && PF00445:Ribonuclease T2 family
Cg07489	90.6259	40.2943	8.41761	29.9531	5.29289	- && sp|Q40965|RNS2_PYRPY Ribonuclease S-2 OS=Pyrus pyrifolia OX=3767 PE=1 SV=1 && PF00445:Ribonuclease T2 family
Cg07491	112.896	86.7782	21.1956	41.0664	134.941	- && - && -
Cg07494	0	0	0.524625	0.346774	0.0303075	- && - && -
Cg07496	0.476086	0.0530109	1.07758	0	3.27283	- && - && -
Cg07509	15.7487	6.63553	35.4001	11.5066	12.8336	- && sp|P41146|OPRX_HUMAN Nociceptin receptor OS=Homo sapiens OX=9606 GN=OPRL1 PE=1 SV=1 && PF00001:7 transmembrane receptor (rhodopsin family)
Cg07516	18.6932	9.32023	18.601	17.3023	25.6861	- && sp|G3M4F8|OCTB2_CHISP Octopamine receptor beta-2R OS=Chilo suppressalis OX=168631 GN=OA2B2 PE=2 SV=1 && PF00001:7 transmembrane receptor (rhodopsin family)
Cg07519	429.688	143.106	171.59	180.173	49.2607	- && - && PF12248:Farnesoic acid 0-methyl transferase
Cg07522	3.99206	2.22942	0.532369	19.6284	4.75316	- && - && PF12248:Farnesoic acid 0-methyl transferase
Cg07535	660.461	382.579	1151.17	275.604	414.722	- && - && -
Cg07536	70.5962	29.6285	187.728	32.9934	9.24658	- && - && -
Cg07537	0.185143	0.134005	5.07595	0.180316	0.137226	- && - && PF00010:Helix-loop-helix DNA-binding domain
Cg07589	5.97906	4.70071	11.4285	3.81687	2.50414	- && sp|Q9JLY7|DUS14_MOUSE Dual specificity protein phosphatase 14 OS=Mus musculus OX=10090 GN=Dusp14 PE=2 SV=2 && PF00782:Dual specificity phosphatase, catalytic domain
Cg07598	0.0225749	0.0731339	0.014574	0.963053	0.0250288	- && - && -
Cg07638	7.43594	15.85	4.10749	11.0382	8.20242	- && sp|Q2YDF6|RT35_BOVIN 28S ribosomal protein S35, mitochondrial OS=Bos taurus OX=9913 GN=MRPS35 PE=1 SV=1 && PF10213:Mitochondrial ribosomal subunit protein
Cg07649	1.0708	2.4017	0.348375	1.50107	1.65901	- && sp|Q7SXM0|HDAC8_DANRE Histone deacetylase 8 OS=Danio rerio OX=7955 GN=hdac8 PE=2 SV=1 && PF00850:Histone deacetylase domain
Cg07664	1.24689	0.495361	2.0585	1.15271	0.950688	- && sp|O60294|TYW4_HUMAN tRNA wybutosine-synthesizing protein 4 OS=Homo sapiens OX=9606 GN=LCMT2 PE=1 SV=3 && PF04072:Leucine carboxyl methyltransferase|PF13418:Galactose oxidase, central domain
Cg07681	0.661516	2.61765	0.0270889	1.40583	2.33001	- && - && -
Cg07682	0.201657	0.0866045	0.720001	0.0951434	0.151696	- && - && -
Cg07691	0.31881	1.33634	0.03252	0.720813	0.364731	- && - && PF00653:Inhibitor of Apoptosis domain
Cg07709	0.222766	1.38588	0.0871719	0	0	- && - && -
Cg07733	0.958178	0.712088	4.965	0.228125	0.20105	- && - && -
Cg07752	5.3003	6.0079	1.82191	0.522653	1.74891	- && sp|O35449|PRRT1_MOUSE Proline-rich transmembrane protein 1 OS=Mus musculus OX=10090 GN=Prrt1 PE=1 SV=1 && PF04505:Interferon-induced transmembrane protein
Cg07754	7.43387	0.429136	4.86313	2.06617	1.92257	- && - && PF04505:Interferon-induced transmembrane protein
Cg07756	19.1658	14.0423	5.52612	6.56074	11.2416	- && - && PF04505:Interferon-induced transmembrane protein
Cg07763	35.436	76.3074	179.571	80.6781	14.2207	- && sp|Q99946|PRRT1_HUMAN Proline-rich transmembrane protein 1 OS=Homo sapiens OX=9606 GN=PRRT1 PE=1 SV=2 && PF04505:Interferon-induced transmembrane protein
Cg07766	183.512	244.648	610.555	191.651	810.598	- && sp|Q99946|PRRT1_HUMAN Proline-rich transmembrane protein 1 OS=Homo sapiens OX=9606 GN=PRRT1 PE=1 SV=2 && PF04505:Interferon-induced transmembrane protein
Cg07771	70.6433	5.95439	27.8891	7.9825	9.18653	- && - && -
Cg07773	0.792634	0.603664	1.65046	1.14042	0.0300344	- && sp|P16331|PH4H_MOUSE Phenylalanine-4-hydroxylase OS=Mus musculus OX=10090 GN=Pah PE=1 SV=4 && PF00351:Biopterin-dependent aromatic amino acid hydroxylase
Cg07786	1.11038	1.38908	0.641166	1.38031	0.342359	- && - && -
Cg07805	171.669	19.9254	65.6209	158.253	20.6872	- && - && -
Cg07830	0.174376	0.532272	0.167044	0.394049	0	- && sp|B2IZD3|BDLP_NOSP7 Bacterial dynamin-like protein OS=Nostoc punctiforme (strain ATCC 29133 / PCC 73102) OX=63737 GN=Npun_R6513 PE=1 SV=1 && PF00350:Dynamin family
Cg07834	0.50853	0.0958707	0.543259	0.0506778	3.32813	- && - && PF00059:Lectin C-type domain
Cg07867	10.9533	0.04938	3.60768	0.177187	9.13667	- && - && -
Cg07897	112.321	26.3541	57.2707	28.9587	36.8673	- && sp|Q6NXD2|CHM2B_DANRE Charged multivesicular body protein 2b OS=Danio rerio OX=7955 GN=chmp2b PE=2 SV=1 && PF03357:Snf7
Cg07898	94.296	42.0345	92.6198	40.1017	33.2667	- && sp|O62640|PIAP_PIG Putative inhibitor of apoptosis OS=Sus scrofa OX=9823 GN=PIAP PE=2 SV=1 && PF13920:Zinc finger, C3HC4 type (RING finger)|PF00653:Inhibitor of Apoptosis domain
Cg07899	3.6649	1.60781	3.68905	2.1571	2.04243	- && sp|O62640|PIAP_PIG Putative inhibitor of apoptosis OS=Sus scrofa OX=9823 GN=PIAP PE=2 SV=1 && PF00653:Inhibitor of Apoptosis domain|PF13920:Zinc finger, C3HC4 type (RING finger)
Cg07910	0.594068	0.54451	2.56606	0.809543	0.286344	- && sp|Q13490|BIRC2_HUMAN Baculoviral IAP repeat-containing protein 2 OS=Homo sapiens OX=9606 GN=BIRC2 PE=1 SV=2 && PF00653:Inhibitor of Apoptosis domain|PF13920:Zinc finger, C3HC4 type (RING finger)
Cg07911	0.982432	0.40219	2.13452	1.49876	0.715522	- && sp|O08863|BIRC3_MOUSE Baculoviral IAP repeat-containing protein 3 OS=Mus musculus OX=10090 GN=Birc3 PE=1 SV=2 && PF00653:Inhibitor of Apoptosis domain|PF13920:Zinc finger, C3HC4 type (RING finger)
Cg07921	6.03828	7.52318	5.65782	0.150038	2.3531	- && - && -
Cg07973	1.02205	0.758318	0.842289	0.242008	3.78868	- && sp|O43903|GAS2_HUMAN Growth arrest-specific protein 2 OS=Homo sapiens OX=9606 GN=GAS2 PE=1 SV=1 && PF00307:Calponin homology (CH) domain|PF02187:Growth-Arrest-Specific Protein 2 Domain
Cg08003	0.03478	0.401345	0	0.0615538	0	- && - && -
Cg08004	1.64992	1.39354	1.03429	1.63614	0.243438	- && - && -
Cg08022	2.57212	2.52147	0.384372	0.784307	1.31249	- && - && PF13960:Domain of unknown function (DUF4218)|PF02992:Transposase family tnp2
Cg08033	0.295966	0	0.0113561	0	0.277191	- && - && -
Cg08054	0.68795	2.7526	2.95422	0.284668	2.4228	- && - && -
Cg08055	0.0695204	0.601946	0	0.179932	0.473826	- && - && -
Cg08070	0.676287	1.92555	0	7.71915	4.65522	- && - && -
Cg08085	2.31651	5.60198	0.470185	2.70573	1.97594	- && - && PF12012:Domain of unknown function (DUF3504)
Cg08090	6.57055	1.05284	4.6173	4.7614	7.14041	- && - && -
Cg08110	0.283928	0.716058	0.0725792	0	0.00747665	- && sp|P35441|TSP1_MOUSE Thrombospondin-1 OS=Mus musculus OX=10090 GN=Thbs1 PE=1 SV=1 && PF00090:Thrombospondin type 1 domain|PF07699:Putative ephrin-receptor like|PF02494:HYR domain|PF00008:EGF-like domain|PF13385:Concanavalin A-like lectin/glucanases superfamily
Cg08143	0.0558193	9.53149	2.11325	1.84248	2.19104	- && - && -
Cg08161	0.592218	1.19026	0.186956	0.970661	1.0477	- && - && PF00643:B-box zinc finger
Cg08167	0.269241	0.616536	0.127373	0.768527	0.29958	- && sp|Q6ZXV5|TMTC3_HUMAN Protein O-mannosyl-transferase TMTC3 OS=Homo sapiens OX=9606 GN=TMTC3 PE=1 SV=2 && PF13181:Tetratricopeptide repeat|PF13414:TPR repeat|PF08409:Domain of unknown function (DUF1736)
Cg08169	11.8552	4.45566	14.1986	8.46183	4.93566	- && sp|O73853|CP17A_ICTPU Steroid 17-alpha-hydroxylase/17,20 lyase OS=Ictalurus punctatus OX=7998 GN=cyp17a1 PE=2 SV=1 && PF00067:Cytochrome P450
Cg08192	0.438828	0.744314	0.204282	0.327093	0.324086	- && - && PF04852:Protein of unknown function (DUF640)|PF00078:Reverse transcriptase (RNA-dependent DNA polymerase)
Cg08230	0.107878	0	1.1701	0.143846	0	- && - && -
Cg08237	16.1954	8.85586	36.0856	5.23232	5.92783	- && - && PF00050:Kazal-type serine protease inhibitor domain
Cg08241	0.838984	0.575905	2.0377	0.641308	0.384043	- && - && -
Cg08270	0.170142	0.158287	0.0860702	0.563657	0.0142414	- && sp|B1VTI5|GRIF_STRGG Grixazone synthase OS=Streptomyces griseus subsp. griseus (strain JCM 4626 / NBRC 13350) OX=455632 GN=griF PE=1 SV=1 && PF00264:Common central domain of tyrosinase
Cg08280	6.56503	7.93738	25.214	34.4935	16.9199	- && - && -
Cg08281	0.272674	0.0693051	0.308959	0.445474	0.383465	- && sp|A0A0R4IBK5|R213A_DANRE E3 ubiquitin-protein ligase rnf213-alpha OS=Danio rerio OX=7955 GN=rnf213a PE=3 SV=1 && -
Cg08282	0.125237	0.0249769	0.191591	0.351793	0.293566	- && sp|A0A0R4IBK5|R213A_DANRE E3 ubiquitin-protein ligase rnf213-alpha OS=Danio rerio OX=7955 GN=rnf213a PE=3 SV=1 && -
Cg08285	0.149558	0.377138	0.568681	0.517612	0	- && sp|Q56R14|TRI33_XENLA E3 ubiquitin-protein ligase TRIM33 OS=Xenopus laevis OX=8355 GN=trim33 PE=1 SV=1 && PF00097:Zinc finger, C3HC4 type (RING finger)
Cg08308	0.853398	0.176068	0.959219	0.424555	0.610007	- && sp|A2BE28|LAS1L_MOUSE Ribosomal biogenesis protein LAS1L OS=Mus musculus OX=10090 GN=Las1l PE=1 SV=1 && PF04031:Las1-like
Cg08309	33.8743	10.2105	30.2075	22.2137	16.0435	- && sp|P32240|PE2R4_MOUSE Prostaglandin E2 receptor EP4 subtype OS=Mus musculus OX=10090 GN=Ptger4 PE=2 SV=1 && PF00001:7 transmembrane receptor (rhodopsin family)
Cg08312	4.52572	2.42716	10.2382	3.26812	2.32625	- && sp|Q9VCZ3|OCTB1_DROME Octopamine receptor beta-1R OS=Drosophila melanogaster OX=7227 GN=Octbeta1R PE=2 SV=1 && PF00001:7 transmembrane receptor (rhodopsin family)
Cg08316	0.798542	2.4138	0.457322	0.696758	0.334574	- && - && -
Cg08341	0.480725	0.736763	0	1.43654	0.0167689	- && sp|Q9V8M2|C12B2_DROME Probable cytochrome P450 12b2, mitochondrial OS=Drosophila melanogaster OX=7227 GN=Cyp12b2 PE=2 SV=2 && PF00067:Cytochrome P450
Cg08395	0.548837	0.207766	0.482667	0.61307	0.549155	- && sp|A0A0R4IBK5|R213A_DANRE E3 ubiquitin-protein ligase rnf213-alpha OS=Danio rerio OX=7955 GN=rnf213a PE=3 SV=1 && -
Cg08415	0.467253	1.6573	0.488813	0.268347	0.928133	- && sp|Q8TDW5|SYTL5_HUMAN Synaptotagmin-like protein 5 OS=Homo sapiens OX=9606 GN=SYTL5 PE=1 SV=1 && PF02318:FYVE-type zinc finger|PF00168:C2 domain
Cg08418	7.00153	31.3501	6.61814	5.17579	10.0284	- && sp|B3DLF3|LYRM2_XENTR LYR motif-containing protein 2 OS=Xenopus tropicalis OX=8364 GN=lyrm2 PE=3 SV=1 && -
Cg08419	88.9473	128.797	310.292	36.6642	27.4736	- && - && -
Cg08421	14.155	15.6392	95.3264	3.1988	2.84043	- && - && -
Cg08439	3.93849	3.96092	0.355295	2.45462	2.0527	- && - && PF00583:Acetyltransferase (GNAT) family
Cg08451	6.8988	3.33639	11.0788	4.81764	3.90069	- && sp|Q3UVX5|GRM5_MOUSE Metabotropic glutamate receptor 5 OS=Mus musculus OX=10090 GN=Grm5 PE=1 SV=2 && PF01094:Receptor family ligand binding region|PF00003:7 transmembrane sweet-taste receptor of 3 GCPR|PF07562:Nine Cysteines Domain of family 3 GPCR
Cg08466	9.38577	3.48627	7.88237	7.4154	7.74918	- && sp|Q5EAJ7|MVP_STRPU Major vault protein OS=Strongylocentrotus purpuratus OX=7668 GN=MVP PE=1 SV=1 && PF17794:Major Vault Protein repeat domain|PF17795:Major Vault Protein Repeat domain|PF17796:Major Vault Protein repeat domain|PF01505:Major Vault Protein repeat domain|PF01541:GIY-YIG catalytic domain
Cg08477	150.325	299.649	132.496	166.143	260.851	- && sp|Q2TBP7|MYCBP_BOVIN c-Myc-binding protein OS=Bos taurus OX=9913 GN=MYCBP PE=3 SV=3 && -
Cg08501	2.23045	0.437606	0.580974	4.64793	0.315831	- && - && -
Cg08513	1.39935	1.08259	0	1.58565	3.79536	- && - && -
Cg08515	0.388023	0.239837	0.188607	2.316	16.5185	- && - && PF05483:Synaptonemal complex protein 1 (SCP-1)
Cg08545	16.2813	17.0929	37.6779	13.0461	13.0521	- && sp|P34729|RAS1_PHYPO Ras-like protein 1 OS=Physarum polycephalum OX=5791 GN=RAS1 PE=2 SV=1 && PF00071:Ras family
Cg08547	0.0602128	0.910556	0.0667437	0.695675	0.295505	- && sp|Q91WL8|WWOX_MOUSE WW domain-containing oxidoreductase OS=Mus musculus OX=10090 GN=Wwox PE=1 SV=1 && PF00106:short chain dehydrogenase
Cg08591	4.17066	6.13263	2.11988	5.8117	4.41825	- && - && PF13649:Methyltransferase domain
Cg08593	19.0889	34.1548	13.7456	35.0974	29.8836	- && - && PF00386:C1q domain
Cg08608	1.75807	0.532002	8.03692	0.0473216	0.147823	- && - && PF14704:Dermatopontin
Cg08611	2.60135	0.707903	1.87745	0.97559	4.77336	- && - && PF00386:C1q domain
Cg08618	1.25825	2.21476	0.747811	0.586191	0.560635	- && sp|O75626|PRDM1_HUMAN PR domain zinc finger protein 1 OS=Homo sapiens OX=9606 GN=PRDM1 PE=1 SV=2 && PF00096:Zinc finger, C2H2 type
Cg08643	20.8409	8.49369	21.2765	16.3581	19.3153	- && sp|P23514|COPB_RAT Coatomer subunit beta OS=Rattus norvegicus OX=10116 GN=Copb1 PE=1 SV=1 && PF01602:Adaptin N terminal region|PF14806:Coatomer beta subunit appendage platform|PF07718:Coatomer beta C-terminal region
Cg08658	0.171251	0	0.0978103	0.883435	0.0114734	- && - && -
Cg08665	0	0.0109014	0.0238885	0.00401668	1.60828	- && sp|Q91Y77|MOT10_RAT Monocarboxylate transporter 10 OS=Rattus norvegicus OX=10116 GN=Slc16a10 PE=1 SV=1 && PF07690:Major Facilitator Superfamily
Cg08668	14.1337	6.50675	16.7638	10.5358	6.08439	- && sp|Q9R0I6|XIAP_RAT E3 ubiquitin-protein ligase XIAP OS=Rattus norvegicus OX=10116 GN=Xiap PE=2 SV=1 && PF13920:Zinc finger, C3HC4 type (RING finger)
Cg08670	1.10354	1.20132	0.42686	1.14976	1.1245	- && sp|Q6GLJ1|BTBDH_XENLA BTB/POZ domain-containing protein 17 OS=Xenopus laevis OX=8355 GN=btbd17 PE=2 SV=2 && PF07707:BTB And C-terminal Kelch|PF00651:BTB/POZ domain
Cg08672	8.96701	4.09221	20.08	5.97216	5.5859	- && - && PF00001:7 transmembrane receptor (rhodopsin family)
Cg08673	22.693	11.4531	41.7297	21.1153	10.5058	- && - && -
Cg08689	4.61813	2.01983	4.3177	5.84132	7.13163	- && sp|Q8BMF3|MAON_MOUSE NADP-dependent malic enzyme, mitochondrial OS=Mus musculus OX=10090 GN=Me3 PE=1 SV=2 && PF03949:Malic enzyme, NAD binding domain|PF00390:Malic enzyme, N-terminal domain
Cg08696	0.783753	0.123051	0.179644	1.8339	0.338642	- && sp|O88536|FPR2_MOUSE Formyl peptide receptor 2 OS=Mus musculus OX=10090 GN=Fpr2 PE=1 SV=1 && PF00001:7 transmembrane receptor (rhodopsin family)
Cg08699	0	2.08295	0.21329	0	0.116543	- && - && PF00386:C1q domain
Cg08703	0	4.455	0.6182	0	0	- && - && PF00386:C1q domain
Cg08704	9.5323	22.058	9.24365	0.386869	7.06483	- && - && PF00386:C1q domain
Cg08705	2.54467	0.649756	4.65044	7.47535	2.94274	- && - && PF00386:C1q domain
Cg08711	0	0.482957	0	0	0.0883508	- && - && -
Cg08748	5.85596	7.37499	22.6513	8.62581	3.42548	- && - && PF13499:EF-hand domain pair
Cg08769	0.103966	2.58859	0.963122	0	0.565565	- && - && -
Cg08785	1.54807	0.929386	0.0383459	0	0.977664	- && - && -
Cg08789	18.616	2.16087	7.20587	3.26139	1.81674	- && - && -
Cg08805	0.644737	3.22534	8.21556	1.63124	3.03879	- && sp|P23471|PTPRZ_HUMAN Receptor-type tyrosine-protein phosphatase zeta OS=Homo sapiens OX=9606 GN=PTPRZ1 PE=1 SV=4 && PF00102:Protein-tyrosine phosphatase
Cg08806	1.10025	3.22639	10.6358	0.387287	2.30159	- && sp|Q99M80|PTPRT_MOUSE Receptor-type tyrosine-protein phosphatase T OS=Mus musculus OX=10090 GN=Ptprt PE=1 SV=2 && PF00102:Protein-tyrosine phosphatase
Cg08832	0.0963433	0.0898464	0.202949	0.619729	0	- && sp|G5EG78|PXDN2_CAEEL Peroxidasin homolog pxn-2 OS=Caenorhabditis elegans OX=6239 GN=pxn-2 PE=1 SV=1 && PF03098:Animal haem peroxidase
Cg08843	3.42854	0.385335	0.7873	0.0457993	1.50842	- && - && PF04434:SWIM zinc finger
Cg08845	0.902695	1.6405	1.47135	3.23179	0.779834	- && - && PF13613:Helix-turn-helix of DDE superfamily endonuclease|PF05485:THAP domain|PF13359:DDE superfamily endonuclease
Cg08861	8.51854	37.4095	17.1575	34.6898	52.9609	- && sp|P52292|IMA1_HUMAN Importin subunit alpha-1 OS=Homo sapiens OX=9606 GN=KPNA2 PE=1 SV=1 && PF01749:Importin beta binding domain|PF00514:Armadillo/beta-catenin-like repeat|PF16186:Atypical Arm repeat
Cg08862	9.72833	3.89136	3.07429	1.87353	0.385461	- && - && -
Cg08872	1.34299	2.19628	0.94489	1.6857	1.74258	- && sp|Q9NRJ4|TULP4_HUMAN Tubby-related protein 4 OS=Homo sapiens OX=9606 GN=TULP4 PE=1 SV=2 && PF01167:Tub family
Cg08893	4.18405	1.56786	3.50528	4.31721	3.70757	- && sp|Q96GD3|SCMH1_HUMAN Polycomb protein SCMH1 OS=Homo sapiens OX=9606 GN=SCMH1 PE=1 SV=1 && PF00536:SAM domain (Sterile alpha motif)|PF02820:mbt repeat|PF12140:SLED domain
Cg08908	51.6024	79.4706	24.8175	8.93775	49.4586	- && - && -
Cg08919	0	0.245938	0	0.0816201	0	- && - && -
Cg08922	7.67782	14.5742	5.19103	4.26333	3.19872	- && sp|Q8BTW8|CK5P1_MOUSE Mitochondrial tRNA methylthiotransferase CDK5RAP1 OS=Mus musculus OX=10090 GN=Cdk5rap1 PE=1 SV=2 && PF00919:Uncharacterized protein family UPF0004|PF01938:TRAM domain|PF04055:Radical SAM superfamily|PF01408:Oxidoreductase family, NAD-binding Rossmann fold
Cg08923	21.5965	7.40639	16.1376	10.0039	5.71223	- && sp|Q7ZYI3|MDM4_XENLA Protein Mdm4 OS=Xenopus laevis OX=8355 GN=mdm4 PE=2 SV=1 && PF02201:SWIB/MDM2 domain|PF13920:Zinc finger, C3HC4 type (RING finger)
Cg08941	1.76982	0.55604	2.41014	0.790376	0.155516	- && - && PF00386:C1q domain
Cg08960	0	0	0	0	1.09162	- && sp|Q05831|H1L_MYTTR Sperm-specific protein PHI-2B/PHI-3 OS=Mytilus trossulus OX=6551 PE=1 SV=2 && PF00538:linker histone H1 and H5 family
Cg08963	4.72838	2.01356	4.181	4.67955	12.5869	- && sp|Q96B97|SH3K1_HUMAN SH3 domain-containing kinase-binding protein 1 OS=Homo sapiens OX=9606 GN=SH3KBP1 PE=1 SV=2 && PF14604:Variant SH3 domain
Cg08970	0.0766874	0	0	0.6831	0	- && sp|Q4ZHG4|FNDC1_HUMAN Fibronectin type III domain-containing protein 1 OS=Homo sapiens OX=9606 GN=FNDC1 PE=2 SV=4 && PF00024:PAN domain
Cg08981	0.561255	0.228079	1.16548	4.83971	34.301	- && - && -
Cg08983	0.81583	1.01463	0.52191	0.560663	2.56275	- && sp|Q4R918|KIF25_MACFA Kinesin-like protein KIF25 OS=Macaca fascicularis OX=9541 GN=KIF25 PE=1 SV=1 && PF00225:Kinesin motor domain
Cg08987	37.3116	12.682	35.7715	17.4352	24.2356	- && - && PF00001:7 transmembrane receptor (rhodopsin family)
Cg08993	1.55428	0.789474	0.440644	0.690789	4.5785	- && - && -
Cg08997	2.73168	5.32196	1.932	3.32993	2.48881	- && sp|Q95K40|CCD83_MACFA Coiled-coil domain-containing protein 83 OS=Macaca fascicularis OX=9541 GN=CCDC83 PE=2 SV=1 && -
Cg09009	5.27658	2.85215	7.22246	4.8783	3.1307	- && sp|P70627|FOLH1_RAT Glutamate carboxypeptidase 2 OS=Rattus norvegicus OX=10116 GN=Folh1 PE=1 SV=1 && PF04253:Transferrin receptor-like dimerisation domain|PF04389:Peptidase family M28|PF02225:PA domain
Cg09018	0.0377797	0.45857	0.0123215	6.13559	6.92445	- && - && PF08014:Domain of unknown function (DUF1704)
Cg09021	0.29066	0.507753	0.595471	0.772337	12.9268	- && - && PF00505:HMG (high mobility group) box
Cg09035	0.770601	2.31008	0.752957	0.583076	2.971	- && sp|Q8TE73|DYH5_HUMAN Dynein axonemal heavy chain 5 OS=Homo sapiens OX=9606 GN=DNAH5 PE=1 SV=3 && PF17852:Dynein heavy chain AAA lid domain|PF18199:Dynein heavy chain C-terminal domain|PF08385:Dynein heavy chain, N-terminal region 1|PF17857:AAA+ lid domain|PF12775:P-loop containing dynein motor region|PF03028:Dynein heavy chain region D6 P-loop domain|PF12777:Microtubule-binding stalk of dyne…
Cg09036	0	0.940033	0.0815733	2.21562	1.06181	- && - && -
Cg09037	1.66601	2.97774	1.22075	0.771257	1.28244	- && sp|O43559|FRS3_HUMAN Fibroblast growth factor receptor substrate 3 OS=Homo sapiens OX=9606 GN=FRS3 PE=1 SV=3 && PF02174:PTB domain (IRS-1 type)
Cg09042	21.2447	44.2109	18.2435	71.9429	90.0755	- && sp|P59910|DJB13_HUMAN DnaJ homolog subfamily B member 13 OS=Homo sapiens OX=9606 GN=DNAJB13 PE=1 SV=1 && PF01556:DnaJ C terminal domain|PF00226:DnaJ domain
Cg09043	0.278014	0.624131	0.381789	0.92927	5.70244	- && sp|Q6ZTR5|CFA47_HUMAN Cilia- and flagella-associated protein 47 OS=Homo sapiens OX=9606 GN=CFAP47 PE=2 SV=5 && -
Cg09046	0	0.425237	0	0.0268772	0	- && sp|O95907|MOT3_HUMAN Monocarboxylate transporter 3 OS=Homo sapiens OX=9606 GN=SLC16A8 PE=2 SV=1 && PF07690:Major Facilitator Superfamily
Cg09049	0.0939923	0.29682	0	0	0.504557	- && - && PF00350:Dynamin family
Cg09050	0	0	1.19105	0	0	- && - && PF13837:Myb/SANT-like DNA-binding domain
Cg09059	9.66419	0.0410082	1.52608	3.82319	0.5915	- && - && -
Cg09086	29.4417	11.5868	35.0748	17.9038	4.69225	- && sp|Q24307|DIAP2_DROME Death-associated inhibitor of apoptosis 2 OS=Drosophila melanogaster OX=7227 GN=Diap2 PE=1 SV=3 && PF13920:Zinc finger, C3HC4 type (RING finger)|PF00653:Inhibitor of Apoptosis domain
Cg09099	4.15182	0.333565	1.61038	0.47654	0.975926	- && sp|Q9GZS9|CHST5_HUMAN Carbohydrate sulfotransferase 5 OS=Homo sapiens OX=9606 GN=CHST5 PE=2 SV=3 && PF13469:Sulfotransferase family
Cg09118	0.863725	3.89885	1.19291	0.661894	0.271073	- && - && -
Cg09120	0.376335	1.19905	0.131044	0.360511	0.441254	- && sp|Q5F389|WWOX_CHICK WW domain-containing oxidoreductase OS=Gallus gallus OX=9031 GN=WWOX PE=2 SV=2 && PF00106:short chain dehydrogenase
Cg09123	0.0649302	0.696241	0.0521786	0.0502172	0	- && sp|Q9PTS8|ACHA9_CHICK Neuronal acetylcholine receptor subunit alpha-9 OS=Gallus gallus OX=9031 GN=CHRNA9 PE=1 SV=1 && PF02931:Neurotransmitter-gated ion-channel ligand binding domain|PF02932:Neurotransmitter-gated ion-channel transmembrane region
Cg09124	1.88203	4.56671	2.07784	3.44475	2.35006	- && sp|Q6PEI7|PYRG1_DANRE CTP synthase 1 OS=Danio rerio OX=7955 GN=ctps1 PE=1 SV=1 && PF06418:CTP synthase N-terminus|PF00117:Glutamine amidotransferase class-I
Cg09128	1.35967	0.570009	0.446722	0.474361	1.61581	- && - && PF03281:Mab-21 protein
Cg09141	2978.61	1914.34	3777	2502.08	3562.87	- && sp|Q6NUC1|CNFNA_XENLA Cornifelin homolog A OS=Xenopus laevis OX=8355 GN=cnfn-a PE=3 SV=1 && PF04749:PLAC8 family
Cg09152	0	0	0.449318	0.027696	0	- && - && PF00735:Septin|PF00041:Fibronectin type III domain
Cg09165	9.83629	5.46175	13.4052	6.54723	6.20492	- && - && PF00001:7 transmembrane receptor (rhodopsin family)
Cg09172	1.9674	1.36899	4.19491	2.14693	3.73088	- && sp|P80424|LDTI_HIRME Leech-derived tryptase inhibitor C OS=Hirudo medicinalis OX=6421 PE=1 SV=1 && PF00050:Kazal-type serine protease inhibitor domain
Cg09184	52.6979	34.6814	67.7722	52.9563	64.7918	- && sp|P35992|PTP10_DROME Tyrosine-protein phosphatase 10D OS=Drosophila melanogaster OX=7227 GN=Ptp10D PE=1 SV=4 && PF00102:Protein-tyrosine phosphatase
Cg09185	3.29436	2.60505	5.58295	1.68522	2.27727	- && - && PF00001:7 transmembrane receptor (rhodopsin family)
Cg09191	0.362478	1.16101	0.437771	0.63967	1.88974	- && sp|Q5XK92|CIP2A_XENLA Protein CIP2A homolog OS=Xenopus laevis OX=8355 PE=2 SV=1 && -
Cg09203	4.92121	10.77	2.13225	1.7512	6.78492	- && sp|P82197|PDXK_SHEEP Pyridoxal kinase OS=Ovis aries OX=9940 GN=PDXK PE=1 SV=1 && PF08543:Phosphomethylpyrimidine kinase
Cg09204	0.916933	0.622333	3.39725	2.64669	2.69466	- && sp|P82197|PDXK_SHEEP Pyridoxal kinase OS=Ovis aries OX=9940 GN=PDXK PE=1 SV=1 && PF08543:Phosphomethylpyrimidine kinase
Cg09206	14.3838	22.2896	9.84025	7.16996	13.0998	- && sp|D4A1J4|BDH2_RAT 3-hydroxybutyrate dehydrogenase type 2 OS=Rattus norvegicus OX=10116 GN=Bdh2 PE=3 SV=2 && PF13561:Enoyl-(Acyl carrier protein) reductase
Cg09220	12.6005	22.2252	7.89157	7.88377	6.31726	- && sp|Q5ZEQ8|FJX1_XIPMA Four-jointed box protein 1 OS=Xiphophorus maculatus OX=8083 GN=fjx1 PE=2 SV=1 && -
Cg09227	0	0.0083224	0.00730612	0.00616219	0.092186	- && - && -
Cg09232	0.0142704	0.0533495	0.0113658	0.00220946	0.0145264	- && - && -
Cg09234	0.514821	0.30113	0.25535	0.121088	0.928968	- && sp|Q8QZX5|LSM10_MOUSE U7 snRNA-associated Sm-like protein LSm10 OS=Mus musculus OX=10090 GN=Lsm10 PE=1 SV=1 && PF01423:LSM domain
Cg09242	9.32308	12.8176	5.46357	9.82298	20.8552	- && sp|Q2NKT1|PROF4_BOVIN Profilin-4 OS=Bos taurus OX=9913 GN=PFN4 PE=2 SV=1 && PF00235:Profilin
Cg09262	0.544854	2.419	0.157232	7.60503	3.08912	- && - && PF01753:MYND finger
Cg09286	2.44359	1.69487	3.8158	3.06717	2.19428	- && sp|Q99LL5|PWP1_MOUSE Periodic tryptophan protein 1 homolog OS=Mus musculus OX=10090 GN=Pwp1 PE=1 SV=1 && -
Cg09313	0.109864	1.26721	0.170277	0.131775	0.0844709	- && - && -
Cg09322	0.149763	1.63639	0.0366328	0.226879	0.207553	- && sp|Q13591|SEM5A_HUMAN Semaphorin-5A OS=Homo sapiens OX=9606 GN=SEMA5A PE=1 SV=3 && -
Cg09323	21.6716	4.31028	24.7778	17.84	10.5101	- && - && -
Cg09325	3.49804	2.17186	3.77344	4.36377	1.23053	- && - && -
Cg09342	0.379023	7.543	0	0.180707	0.352764	- && - && -
Cg09345	1.23035	1.33689	2.99534	3.15218	2.3154	- && sp|O94822|LTN1_HUMAN E3 ubiquitin-protein ligase listerin OS=Homo sapiens OX=9606 GN=LTN1 PE=1 SV=6 && -
Cg09355	1.79745	1.81076	0.0258818	0.158929	0.084815	- && - && -
Cg09358	14.7873	6.22064	7.36609	13.7667	4.64969	- && sp|O62640|PIAP_PIG Putative inhibitor of apoptosis OS=Sus scrofa OX=9823 GN=PIAP PE=2 SV=1 && PF13920:Zinc finger, C3HC4 type (RING finger)|PF00653:Inhibitor of Apoptosis domain
Cg09375	1.42025	3.66827	0.751333	1.63016	1.00177	- && sp|Q9U3W6|MAB21_DROME Protein mab-21 OS=Drosophila melanogaster OX=7227 GN=mab-21 PE=2 SV=2 && PF00569:Zinc finger, ZZ type|PF03281:Mab-21 protein
Cg09381	0	0	0.149695	0	0.463418	- && - && PF13927:Immunoglobulin domain|PF08205:CD80-like C2-set immunoglobulin domain
Cg09382	3.9396	3.9472	0.46942	6.90173	2.79165	- && sp|P48416|CP10_LYMST Cytochrome P450 10 OS=Lymnaea stagnalis OX=6523 GN=CYP10 PE=2 SV=1 && PF00067:Cytochrome P450
Cg09385	10.7697	6.4327	14.8153	10.5677	4.859	- && sp|Q3SYU2|EF2_BOVIN Elongation factor 2 OS=Bos taurus OX=9913 GN=EEF2 PE=2 SV=3 && PF03144:Elongation factor Tu domain 2|PF00009:Elongation factor Tu GTP binding domain|PF14492:Elongation Factor G, domain III|PF00679:Elongation factor G C-terminus|PF03764:Elongation factor G, domain IV
Cg09392	0.0719741	0.323808	0	0.0502729	0.0977131	- && - && -
Cg09393	0.128041	1.82412	0	0.970556	0.979008	- && sp|Q5UPX0|YR290_MIMIV Putative ATP-dependent RNA helicase R290 OS=Acanthamoeba polyphaga mimivirus OX=212035 GN=MIMI_R290 PE=3 SV=1 && PF00270:DEAD/DEAH box helicase|PF00271:Helicase conserved C-terminal domain
Cg09405	28.969	6.7157	17.2593	12.9124	1.42346	- && - && -
Cg09406	1.03801	0.89431	0.382617	1.19403	0.317766	- && sp|P14381|YTX2_XENLA Transposon TX1 uncharacterized 149 kDa protein OS=Xenopus laevis OX=8355 PE=4 SV=1 && PF00078:Reverse transcriptase (RNA-dependent DNA polymerase)
Cg09428	7.17586	23.576	10.0361	10.182	21.0025	- && sp|Q9H2M3|BHMT2_HUMAN S-methylmethionine--homocysteine S-methyltransferase BHMT2 OS=Homo sapiens OX=9606 GN=BHMT2 PE=1 SV=1 && PF02574:Homocysteine S-methyltransferase
Cg09431	15.5217	21.1151	63.0475	14.813	7.29845	- && sp|Q8VCC1|PGDH_MOUSE 15-hydroxyprostaglandin dehydrogenase [NAD(+)] OS=Mus musculus OX=10090 GN=Hpgd PE=1 SV=1 && PF00106:short chain dehydrogenase|PF04970:Lecithin retinol acyltransferase
Cg09460	144.471	268.42	382.625	250.024	115.988	- && - && -
Cg09463	19.1313	23.4817	11.0395	17.4443	16.9418	- && - && -
Cg09493	0.256644	0.0803796	1.79135	0.0586709	0.298709	- && sp|Q20191|NAS13_CAEEL Zinc metalloproteinase nas-13 OS=Caenorhabditis elegans OX=6239 GN=nas-13 PE=2 SV=5 && PF00051:Kringle domain|PF01400:Astacin (Peptidase family M12A)|PF00059:Lectin C-type domain
Cg09497	0.0486753	0.142767	0.0323426	0.717801	0.0319342	- && - && -
Cg09527	0.6698	0.24462	1.42291	0.918499	0.660612	- && sp|Q149N8|SHPRH_HUMAN E3 ubiquitin-protein ligase SHPRH OS=Homo sapiens OX=9606 GN=SHPRH PE=1 SV=2 && PF00176:SNF2 family N-terminal domain|PF00271:Helicase conserved C-terminal domain
Cg09538	0.661421	0.916193	4.36686	2.39192	2.04069	- && sp|Q9Y5X9|LIPE_HUMAN Endothelial lipase OS=Homo sapiens OX=9606 GN=LIPG PE=1 SV=1 && PF00151:Lipase
Cg09540	30.8049	30.4246	132.616	65.386	54.2617	- && sp|Q9Y5X9|LIPE_HUMAN Endothelial lipase OS=Homo sapiens OX=9606 GN=LIPG PE=1 SV=1 && PF00151:Lipase
Cg09542	113.287	43.8341	146.327	96.155	50.0696	- && sp|P41436|IAP_GVCPM Apoptosis inhibitor IAP OS=Cydia pomonella granulosis virus (isolate Mexico/1963) OX=654905 GN=IAP PE=4 SV=1 && PF00653:Inhibitor of Apoptosis domain
Cg09543	0.364527	2.27423	0.157898	1.64347	1.87069	- && sp|Q94HV7|SPL1P_ARATH E3 ubiquitin-protein ligase SPL1 OS=Arabidopsis thaliana OX=3702 GN=SPL1 PE=2 SV=1 && PF13837:Myb/SANT-like DNA-binding domain
Cg09555	0.181264	0.186705	0.0900594	0.00626804	0.158735	- && sp|P35992|PTP10_DROME Tyrosine-protein phosphatase 10D OS=Drosophila melanogaster OX=7227 GN=Ptp10D PE=1 SV=4 && PF00102:Protein-tyrosine phosphatase
Cg09557	2.48125	5.02829	1.32723	1.27006	2.40756	- && - && -
Cg09574	8.16885	22.1921	7.64221	11.9187	14.4069	- && - && -
Cg09585	1.72203	6.40051	2.18461	1.24494	1.50171	- && - && -
Cg09607	0.989043	2.46449	2.51682	2.34706	0.498274	- && - && -
Cg09617	58.1013	28.3301	67.0778	42.4608	37.8153	- && sp|Q8AVJ1|PRR5_XENLA Proline-rich protein 5 OS=Xenopus laevis OX=8355 GN=prr5 PE=2 SV=1 && PF08539:HbrB-like
Cg09628	0.463636	0	1.06631	0.0542361	0.318208	- && - && -
Cg09645	41.5458	13.1353	27.3087	15.4592	20.9364	- && - && -
Cg09655	2.48984	1.07917	3.22088	1.57804	1.24014	- && - && PF03351:DOMON domain|PF02014:Reeler domain|PF03188:Eukaryotic cytochrome b561
Cg09660	4.31285	2.90507	5.90501	5.30255	5.47504	- && sp|Q9WVE9|ITSN1_RAT Intersectin-1 OS=Rattus norvegicus OX=10116 GN=Itsn1 PE=1 SV=2 && PF00018:SH3 domain|PF00168:C2 domain|PF14604:Variant SH3 domain|PF07653:Variant SH3 domain|PF00621:RhoGEF domain|PF16652:Pleckstrin homology domain|PF12763:Cytoskeletal-regulatory complex EF hand
Cg09666	0.226404	0.356318	4.179	0.0177091	0.558527	- && sp|Q8QFX6|NRP1A_DANRE Neuropilin-1a OS=Danio rerio OX=7955 GN=nrp1a PE=2 SV=1 && PF05345:Putative Ig domain|PF00008:EGF-like domain|PF00754:F5/8 type C domain
Cg09671	0.278677	0.723243	0	0	0.124055	- && - && -
Cg09694	33.7424	15.4531	35.476	21.2008	11.7539	- && sp|Q14432|PDE3A_HUMAN cGMP-inhibited 3',5'-cyclic phosphodiesterase A OS=Homo sapiens OX=9606 GN=PDE3A PE=1 SV=3 && PF00233:3'5'-cyclic nucleotide phosphodiesterase
Cg09707	0.542727	1.56237	0.681166	0.617246	3.83577	- && sp|E9Q8T7|DYH1_MOUSE Dynein axonemal heavy chain 1 OS=Mus musculus OX=10090 GN=Dnah1 PE=1 SV=1 && PF03028:Dynein heavy chain region D6 P-loop domain|PF12775:P-loop containing dynein motor region|PF17857:AAA+ lid domain|PF17852:Dynein heavy chain AAA lid domain|PF08393:Dynein heavy chain, N-terminal region 2|PF12780:P-loop containing dynein motor region D4|PF12774:Hydrolytic ATP binding site …
Cg09711	1.12627	0.389484	0.857839	6.40179	0.729335	- && sp|G3X987|GIMA9_MOUSE GTPase IMAP family member 9 OS=Mus musculus OX=10090 GN=Gimap9 PE=1 SV=1 && PF04548:AIG1 family
Cg09712	0.0817791	0	0	1.85177	0	- && sp|G3X987|GIMA9_MOUSE GTPase IMAP family member 9 OS=Mus musculus OX=10090 GN=Gimap9 PE=1 SV=1 && PF04548:AIG1 family
Cg09715	0.676678	0.607322	0.522634	4.91569	0.184316	- && sp|Q99JY3|GIMA4_MOUSE GTPase IMAP family member 4 OS=Mus musculus OX=10090 GN=Gimap4 PE=1 SV=2 && PF04548:AIG1 family
Cg09730	33.454	5.71163	64.3286	10.8726	18.3549	- && sp|O61715|INX19_CAEEL Innexin-19 OS=Caenorhabditis elegans OX=6239 GN=inx-19 PE=1 SV=2 && PF00876:Innexin
Cg09731	16.5051	8.53523	41.0428	8.34925	13.3834	- && sp|Q23157|INX11_CAEEL Innexin-11 OS=Caenorhabditis elegans OX=6239 GN=inx-11 PE=3 SV=1 && PF00876:Innexin
Cg09762	3.96241	5.01091	1.65987	1.37315	2.0888	- && sp|Q8N394|TMTC2_HUMAN Protein O-mannosyl-transferase TMTC2 OS=Homo sapiens OX=9606 GN=TMTC2 PE=1 SV=1 && PF08409:Domain of unknown function (DUF1736)|PF13181:Tetratricopeptide repeat|PF00515:Tetratricopeptide repeat|PF13424:Tetratricopeptide repeat
Cg09787	0.447216	0.441808	0.486494	1.64469	0.272901	- && sp|Q91ZZ5|RXFP2_MOUSE Relaxin receptor 2 OS=Mus musculus OX=10090 GN=Rxfp2 PE=2 SV=2 && PF00057:Low-density lipoprotein receptor domain class A|PF13855:Leucine rich repeat|PF13306:BspA type Leucine rich repeat region (6 copies)|PF00001:7 transmembrane receptor (rhodopsin family)
Cg09804	0.744808	0.58127	1.76543	1.1543	2.34261	- && sp|O88488|PTPRQ_RAT Phosphatidylinositol phosphatase PTPRQ OS=Rattus norvegicus OX=10116 GN=Ptprq PE=1 SV=1 && PF00041:Fibronectin type III domain|PF00102:Protein-tyrosine phosphatase|PF18861:Transmembrane domain of protein tyrosine phosphatase, receptor type J
Cg09813	10.9571	13.3067	5.44035	3.00473	7.22414	- && - && -
Cg09824	0.150103	0.856137	0.0597899	0.0897411	0.215364	- && - && PF07969:Amidohydrolase family
Cg09840	45.0562	13.794	49.9618	22.3429	15.3783	- && - && -
Cg09851	1.6214	1.74379	5.4478	0.258525	0.233418	- && sp|Q90260|ASL1B_DANRE Achaete-scute homolog 1b OS=Danio rerio OX=7955 GN=ascl1b PE=2 SV=1 && PF00010:Helix-loop-helix DNA-binding domain
Cg09862	2.63182	8.46433	2.53577	5.75673	7.263	- && - && PF00619:Caspase recruitment domain
Cg09872	3.94661	13.2701	4.40114	7.88385	18.3164	- && - && PF15691:Protein phosphatase 1 regulatory subunit 32
Cg09875	110.887	33.8534	181.442	56.4327	41.3217	- && sp|Q01528|HAAF_LIMPO Hemagglutinin/amebocyte aggregation factor OS=Limulus polyphemus OX=6850 PE=1 SV=1 && PF14704:Dermatopontin
Cg09884	0	0.315621	0.0112616	0	0.0272315	- && - && PF00656:Caspase domain
Cg09890	0.244135	1.20206	0.258141	0	6.64757	- && - && -
Cg09899	0	2.28038	0.202046	0	0.0713406	- && - && -
Cg09905	133.276	58.7689	119.913	60.3902	66.3123	- && sp|Q9CX00|IST1_MOUSE IST1 homolog OS=Mus musculus OX=10090 GN=Ist1 PE=1 SV=1 && PF03398:Regulator of Vps4 activity in the MVB pathway
Cg09907	0.565982	0.479656	0.361838	0.477543	1.34286	- && - && PF00931:NB-ARC domain
Cg09925	25.7725	46.7822	20.15	178.322	151.504	- && sp|Q9DAK2|PACRG_MOUSE Parkin coregulated gene protein homolog OS=Mus musculus OX=10090 GN=Pacrg PE=1 SV=1 && PF10274:Parkin co-regulated protein
Cg09946	0.0831147	0.871478	0.426091	0.020658	0.43966	- && sp|P18172|DHGL_DROPS Glucose dehydrogenase [FAD, quinone] OS=Drosophila pseudoobscura pseudoobscura OX=46245 GN=Gld PE=3 SV=4 && PF05199:GMC oxidoreductase|PF00732:GMC oxidoreductase
Cg09950	3.4266	7.58969	25.2852	0.722093	0.842916	- && - && -
Cg09956	168.628	94.4835	193.138	86.3702	78.4286	- && - && -
Cg09973	2.04913	3.07621	0.852071	0.361394	1.40417	- && - && PF11901:Protein of unknown function (DUF3421)
Cg09975	0.168273	0.723429	0.0179738	2.49492	3.34577	- && - && PF05050:Methyltransferase FkbM domain
Cg09978	5.21929	5.0117	2.2374	3.41774	3.74078	- && - && PF00017:SH2 domain
Cg09984	8.9917	1.53179	8.95491	0.057747	0.32099	- && - && -
Cg09986	6.85277	1.16983	23.3521	3.66351	1.71225	- && - && -
Cg09987	38.081	21.11	83.0025	34.9778	24.66	- && sp|Q95KZ0|PE2R4_PANTR Prostaglandin E2 receptor EP4 subtype OS=Pan troglodytes OX=9598 GN=PTGER4 PE=2 SV=1 && PF00001:7 transmembrane receptor (rhodopsin family)
Cg09989	4.73762	19.2016	5.91838	8.25116	7.18222	- && sp|Q6NYU7|UPP_DANRE Uracil phosphoribosyltransferase homolog OS=Danio rerio OX=7955 GN=uprt PE=2 SV=1 && PF14681:Uracil phosphoribosyltransferase
Cg09997	1.02817	0.283272	2.07553	0.26826	0.602089	- && - && -
Cg10000	1.58295	2.6433	0.690079	0.399136	0.807432	- && - && -
Cg10009	0	0	0.0401378	0.944518	0	- && - && -
Cg10010	36.732	15.1136	52.2494	29.5431	30.9604	- && sp|Q4R8W3|TNAP3_MACFA Tumor necrosis factor alpha-induced protein 3 OS=Macaca fascicularis OX=9541 GN=TNFAIP3 PE=2 SV=1 && PF02338:OTU-like cysteine protease
Cg10016	7.24811	10.2168	25.9874	9.59748	8.31964	- && sp|Q9HAT2|SIAE_HUMAN Sialate O-acetylesterase OS=Homo sapiens OX=9606 GN=SIAE PE=1 SV=1 && PF03629:Carbohydrate esterase, sialic acid-specific acetylesterase
Cg10040	7.29715	15.1357	5.53258	9.17547	8.85413	- && sp|P21839|ODBB_BOVIN 2-oxoisovalerate dehydrogenase subunit beta, mitochondrial OS=Bos taurus OX=9913 GN=BCKDHB PE=1 SV=2 && PF02780:Transketolase, C-terminal domain|PF02779:Transketolase, pyrimidine binding domain
Cg10045	6.4306	1.58878	5.02635	8.61059	4.66582	- && sp|Q24307|DIAP2_DROME Death-associated inhibitor of apoptosis 2 OS=Drosophila melanogaster OX=7227 GN=Diap2 PE=1 SV=3 && PF13920:Zinc finger, C3HC4 type (RING finger)|PF00653:Inhibitor of Apoptosis domain
Cg10072	23.0264	28.847	12.7612	21.9294	14.9706	- && sp|Q9Y6C9|MTCH2_HUMAN Mitochondrial carrier homolog 2 OS=Homo sapiens OX=9606 GN=MTCH2 PE=1 SV=1 && PF00153:Mitochondrial carrier protein
Cg10113	26.7008	8.29779	25.8666	20.5256	11.8658	- && sp|Q9CR23|TMEM9_MOUSE Proton-transporting V-type ATPase complex assembly regulator TMEM9 OS=Mus musculus OX=10090 GN=Tmem9 PE=1 SV=1 && PF05434:TMEM9
Cg10130	6.30693	9.11333	4.30412	5.36708	7.40563	- && - && -
Cg10150	1.2231	0.0966115	1.92605	0.153104	0.138958	- && - && -
Cg10157	5.8625	2.34803	8.48029	5.14805	4.14876	- && sp|Q6DN90|IQEC1_HUMAN IQ motif and SEC7 domain-containing protein 1 OS=Homo sapiens OX=9606 GN=IQSEC1 PE=1 SV=1 && PF01369:Sec7 domain|PF16453:PH domain
Cg10159	21.9915	8.07224	17.2852	15.5478	16.0714	- && sp|Q6DN90|IQEC1_HUMAN IQ motif and SEC7 domain-containing protein 1 OS=Homo sapiens OX=9606 GN=IQSEC1 PE=1 SV=1 && PF16453:PH domain|PF01369:Sec7 domain
Cg10169	0.305231	0.178948	1.42856	1.11566	0.0619403	- && - && -
Cg10178	4.54125	5.8507	15.7101	3.69961	5.04321	- && - && -
Cg10179	34.8224	19.8001	45.3577	25.8831	43.7293	- && - && -
Cg10188	16.1984	4.51962	2.38188	6.77814	2.14897	- && - && PF00001:7 transmembrane receptor (rhodopsin family)
Cg10205	11.3976	6.81317	15.5406	9.12009	10.857	- && - && PF15795:Ectodermal ciliogenesis protein
Cg10218	9.79034	6.89004	14.3528	7.42151	7.03646	- && sp|Q9BTV4|TMM43_HUMAN Transmembrane protein 43 OS=Homo sapiens OX=9606 GN=TMEM43 PE=1 SV=1 && PF07787:Transmembrane protein 43
Cg10219	0.0795662	0	0.229723	0.0476389	0.0634039	- && - && -
Cg10239	0.810228	1.91793	0.698627	1.12137	0.59127	- && sp|P20241|NRG_DROME Neuroglian OS=Drosophila melanogaster OX=7227 GN=Nrg PE=1 SV=2 && PF07679:Immunoglobulin I-set domain|PF00041:Fibronectin type III domain
Cg10241	47.8873	80.2823	38.6096	279.012	279.475	- && sp|A7SMR0|MEIG1_NEMVE Meiosis expressed gene 1 protein homolog OS=Nematostella vectensis OX=45351 GN=v1g237368 PE=3 SV=1 && -
Cg10250	16.7362	2.915	7.99866	10.522	10.3022	- && sp|Q8WWW0|RASF5_HUMAN Ras association domain-containing protein 5 OS=Homo sapiens OX=9606 GN=RASSF5 PE=1 SV=1 && PF00788:Ras association (RalGDS/AF-6) domain|PF16517:Novel Ras effector 1 C-terminal SARAH (Sav/Rassf/Hpo) domain
Cg10251	30.9931	13.9236	40.3462	27.7901	21.4819	- && sp|Q9NZQ3|SPN90_HUMAN NCK-interacting protein with SH3 domain OS=Homo sapiens OX=9606 GN=NCKIPSD PE=1 SV=1 && PF09431:Protein of unknown function (DUF2013)|PF00178:Ets-domain
Cg10265	26.3363	44.8737	11.4961	3.69888	10.4828	- && - && -
Cg10267	0.0955446	0.0703365	0.0229359	0.027903	0.800244	- && sp|Q6V0I7|FAT4_HUMAN Protocadherin Fat 4 OS=Homo sapiens OX=9606 GN=FAT4 PE=1 SV=2 && PF00028:Cadherin domain
Cg10268	0.162416	0.293633	0.676153	0.835274	0.160815	- && - && -
Cg10273	0.553236	0.0838311	0.19493	1.76092	0.213766	- && - && -
Cg10280	0.0269499	0.0877777	0.247442	0.107807	2.82085	- && - && -
Cg10281	0.952528	0.237974	1.36778	1.68499	1.38299	- && sp|A7T1N0|TMP2L_NEMVE Transient receptor potential cation channel subfamily M member-like 2 OS=Nematostella vectensis OX=45351 GN=TRPM2 PE=1 SV=1 && PF18139:SLOG in TRPM
Cg10316	1.79866	1.01096	2.4704	0.682248	1.45957	- && sp|P29508|SPB3_HUMAN Serpin B3 OS=Homo sapiens OX=9606 GN=SERPINB3 PE=1 SV=2 && PF00079:Serpin (serine protease inhibitor)
Cg10326	109.041	46.2083	103.478	110.027	128.133	- && sp|Q5RBP9|MPEG1_PONAB Macrophage-expressed gene 1 protein OS=Pongo abelii OX=9601 GN=MPEG1 PE=2 SV=1 && PF01823:MAC/Perforin domain
Cg10344	0.291817	0.944116	1.5231	2.75933	0.295072	- && sp|Q7Z0T3|TEMPT_APLCA Temptin OS=Aplysia californica OX=6500 PE=1 SV=1 && -
Cg10397	25.7592	0.463244	0.0767944	0.0476051	1.78577	- && - && PF00095:WAP-type (Whey Acidic Protein) 'four-disulfide core'
Cg10401	3.06882	1.18859	2.33253	1.17006	1.60329	- && sp|O01761|UNC89_CAEEL Muscle M-line assembly protein unc-89 OS=Caenorhabditis elegans OX=6239 GN=unc-89 PE=1 SV=3 && PF07679:Immunoglobulin I-set domain
Cg10404	8.91178	3.24868	19.9296	11.5177	8.01958	- && - && -
Cg10418	15.243	8.85726	17.2961	12.1744	12.8048	- && sp|O08816|WASL_RAT Neural Wiskott-Aldrich syndrome protein OS=Rattus norvegicus OX=10116 GN=Wasl PE=1 SV=2 && PF00786:P21-Rho-binding domain|PF00568:WH1 domain
Cg10436	9.6667	14.2717	3.37173	4.16996	0.793832	- && - && PF00965:Tissue inhibitor of metalloproteinase
Cg10456	1.19177	0.0249982	0.731583	1.6154	2.18676	- && sp|Q9Y4D7|PLXD1_HUMAN Plexin-D1 OS=Homo sapiens OX=9606 GN=PLXND1 PE=1 SV=3 && PF01833:IPT/TIG domain|PF01437:Plexin repeat
Cg10467	2.08318	5.23237	1.90015	0.340547	1.1454	- && sp|Q4TVR5|DUSTY_BOVIN Dual serine/threonine and tyrosine protein kinase OS=Bos taurus OX=9913 GN=DSTYK PE=2 SV=1 && PF00350:Dynamin family|PF07714:Protein tyrosine and serine/threonine kinase
Cg10478	1.48227	7.64529	1.82442	0.820728	0.331419	- && - && -
Cg10482	6.43734	2.59518	5.29523	5.26931	6.08954	- && sp|Q2M389|WASC4_HUMAN WASH complex subunit 4 OS=Homo sapiens OX=9606 GN=WASHC4 PE=1 SV=2 && PF14745:WASH complex subunit 7, N-terminal|PF14746:WASH complex subunit 7, C-terminal|PF14744:WASH complex subunit 7
Cg10486	1.46658	3.79163	1.35511	0.849674	0.51633	- && - && -
Cg10492	31.9308	7.51095	16.1943	20.2924	17.7246	- && - && -
Cg10505	0.565243	2.31616	0.186889	0.701601	1.78126	- && sp|B9EJI9|T229A_MOUSE Transmembrane protein 229A OS=Mus musculus OX=10090 GN=Tmem229a PE=2 SV=1 && PF06541:Putative ABC-transporter type IV
Cg10522	0.204129	0.876871	0.815137	0.978321	5.07948	- && - && -
Cg10533	3.53537	8.54121	2.89305	8.71157	9.57438	- && sp|Q1JP73|QSPP_BOVIN Queuosine salvage protein OS=Bos taurus OX=9913 PE=2 SV=1 && PF10343:Potential Queuosine, Q, salvage protein family
Cg10545	27.8588	44.0399	12.8239	14.6275	42.2937	- && sp|Q3SZJ4|PTGR1_BOVIN Prostaglandin reductase 1 OS=Bos taurus OX=9913 GN=PTGR1 PE=2 SV=1 && PF00107:Zinc-binding dehydrogenase|PF16884:N-terminal domain of oxidoreductase
Cg10551	1.29469	3.04807	0.902599	4.60062	4.13425	- && sp|Q28CQ7|SUV92_XENTR Histone-lysine N-methyltransferase SUV39H2 OS=Xenopus tropicalis OX=8364 GN=suv39h2 PE=2 SV=2 && PF00856:SET domain|PF05033:Pre-SET motif|PF00385:Chromo (CHRromatin Organisation MOdifier) domain
Cg10553	0.148952	0.0150826	0.398259	0.853131	0.297386	- && - && -
Cg10573	0.779803	0.393411	1.51366	2.70588	0.0655829	- && sp|Q9BWT3|PAPOG_HUMAN Poly(A) polymerase gamma OS=Homo sapiens OX=9606 GN=PAPOLG PE=1 SV=2 && PF04928:Poly(A) polymerase central domain|PF04926:Poly(A) polymerase predicted RNA binding domain
Cg10576	0.387411	0	0.0535014	0.899886	0	- && - && -
Cg10578	0.276981	1.01916	4.30589	3.99276	3.22494	- && - && -
Cg10583	2.27245	5.0208	2.05155	5.01284	3.54733	- && - && PF02892:BED zinc finger
Cg10584	2.36033	0.938766	1.11276	2.69215	0.420764	- && sp|O35678|MGLL_MOUSE Monoglyceride lipase OS=Mus musculus OX=10090 GN=Mgll PE=1 SV=1 && PF12146:Serine aminopeptidase, S33
Cg10587	1.94777	0.68981	2.01438	2.28256	2.81984	- && sp|P78509|RELN_HUMAN Reelin OS=Homo sapiens OX=9606 GN=RELN PE=1 SV=3 && -
Cg10591	4.87185	21.7978	5.70356	6.89333	12.4298	- && sp|Q6DHB5|LHPL3_DANRE LHFPL tetraspan subfamily member 3 protein OS=Danio rerio OX=7955 GN=lhfpl3 PE=2 SV=1 && PF10242:Lipoma HMGIC fusion partner-like protein
Cg10606	42.6159	57.0598	22.0626	34.0273	23.4105	- && sp|Q3ZCE0|LSM8_BOVIN U6 snRNA-associated Sm-like protein LSm8 OS=Bos taurus OX=9913 GN=LSM8 PE=3 SV=3 && -
Cg10617	7.41395	8.49398	2.47127	0.352455	3.1578	- && - && -
Cg10638	2.38003	0.357773	1.57133	0.933665	1.33735	- && - && PF00643:B-box zinc finger
Cg10646	0.122106	1.71059	0.0881425	0	0.0279473	- && sp|Q9PTS8|ACHA9_CHICK Neuronal acetylcholine receptor subunit alpha-9 OS=Gallus gallus OX=9031 GN=CHRNA9 PE=1 SV=1 && PF02931:Neurotransmitter-gated ion-channel ligand binding domain|PF02932:Neurotransmitter-gated ion-channel transmembrane region
Cg10651	18.6624	17.0146	33.8724	33.3806	20.7279	- && sp|Q6P799|SYSC_RAT Serine--tRNA ligase, cytoplasmic OS=Rattus norvegicus OX=10116 GN=Sars1 PE=1 SV=3 && PF02403:Seryl-tRNA synthetase N-terminal domain|PF00587:tRNA synthetase class II core domain (G, H, P, S and T)
Cg10656	0.474669	0.170103	0.104017	0.663169	0.136491	- && sp|Q9Z1L5|CA2D3_MOUSE Voltage-dependent calcium channel subunit alpha-2/delta-3 OS=Mus musculus OX=10090 GN=Cacna2d3 PE=1 SV=1 && PF08399:VWA N-terminal|PF00092:von Willebrand factor type A domain|PF08473:Neuronal voltage-dependent calcium channel alpha 2acd
Cg10658	0.264483	0.54408	1.19424	2.1021	0.0975016	- && sp|P16066|ANPRA_HUMAN Atrial natriuretic peptide receptor 1 OS=Homo sapiens OX=9606 GN=NPR1 PE=1 SV=1 && PF00211:Adenylate and Guanylate cyclase catalytic domain|PF01094:Receptor family ligand binding region|PF07714:Protein tyrosine and serine/threonine kinase
Cg10675	0	0.951109	0	0.695045	0.0963808	- && - && -
Cg10694	0.637276	0	0.674035	0	2.02872	- && - && -
Cg10724	0.620913	0.195195	2.05679	0.461153	1.75043	- && sp|Q6DFJ6|TBK1_XENLA Serine/threonine-protein kinase TBK1 OS=Xenopus laevis OX=8355 GN=tbk1 PE=2 SV=1 && PF00069:Protein kinase domain
Cg10749	3.52574	1.64496	5.03542	2.4574	3.00412	- && - && PF00001:7 transmembrane receptor (rhodopsin family)
Cg10762	1.08522	0.877914	11.4342	2.00525	3.21881	- && - && -
Cg10781	0.173708	0.461978	0.129235	0.0454338	0.477552	- && - && -
Cg10795	0	0.208594	0	0.384274	0	- && - && -
Cg10798	1.56634	0.650784	9.98894	2.10081	2.59866	- && - && -
Cg10809	2.10043	3.09904	1.28422	2.239	2.28232	- && sp|Q6IQ20|NAPEP_HUMAN N-acyl-phosphatidylethanolamine-hydrolyzing phospholipase D OS=Homo sapiens OX=9606 GN=NAPEPLD PE=1 SV=2 && PF12706:Beta-lactamase superfamily domain
Cg10810	0.612991	1.55666	0.45953	1.31235	4.1068	- && sp|Q6ZUG5|YC006_HUMAN Uncharacterized protein FLJ43738 OS=Homo sapiens OX=9606 PE=2 SV=1 && PF15084:Domain of unknown function (DUF4550)
Cg10837	0.104982	23.8898	0	24.3646	0	- && sp|P11387|TOP1_HUMAN DNA topoisomerase 1 OS=Homo sapiens OX=9606 GN=TOP1 PE=1 SV=2 && PF14370:C-terminal topoisomerase domain|PF01028:Eukaryotic DNA topoisomerase I, catalytic core
Cg10841	0	0.0336263	0.664276	0.182608	0.742362	- && - && PF02902:Ulp1 protease family, C-terminal catalytic domain
Cg10889	1.3233	4.20471	0.611066	27.0696	4.46015	- && - && PF01565:FAD binding domain
Cg10904	0.164909	0	0	0	0.361046	- && sp|Q9NUV9|GIMA4_HUMAN GTPase IMAP family member 4 OS=Homo sapiens OX=9606 GN=GIMAP4 PE=1 SV=1 && PF04548:AIG1 family
Cg10905	3.62508	1.42848	3.63238	0.916444	1.15622	- && sp|Q9NUV9|GIMA4_HUMAN GTPase IMAP family member 4 OS=Homo sapiens OX=9606 GN=GIMAP4 PE=1 SV=1 && PF04548:AIG1 family
Cg10940	8.67613	6.54937	19.1735	9.51058	18.3135	- && - && PF08357:SEFIR domain
Cg10943	11.1919	4.09122	15.7006	8.8664	2.72579	- && - && -
Cg10979	0.188208	0.276914	1.02753	0.598692	0.568905	- && sp|Q99758|ABCA3_HUMAN Phospholipid-transporting ATPase ABCA3 OS=Homo sapiens OX=9606 GN=ABCA3 PE=1 SV=2 && PF00005:ABC transporter|PF12698:ABC-2 family transporter protein
Cg10995	127.877	42.5642	126.912	140.511	84.1146	- && sp|Q497B2|TM45B_RAT Transmembrane protein 45B OS=Rattus norvegicus OX=10116 GN=Tmem45b PE=1 SV=1 && PF04819:Family of unknown function (DUF716)
Cg11010	1.3087	0.96402	0.436267	4.31874	0.408843	- && - && PF00651:BTB/POZ domain
Cg11024	13.7912	2.89127	7.74199	6.55926	6.20844	- && sp|Q96WM9|LAC2_BOTFU Laccase-2 OS=Botryotinia fuckeliana OX=40559 GN=lcc2 PE=2 SV=1 && PF07731:Multicopper oxidase|PF00394:Multicopper oxidase|PF07732:Multicopper oxidase
Cg11045	0.0157351	0	0.0909913	0.0247165	0.488912	- && sp|O57409|DLLB_DANRE Delta-like protein B OS=Danio rerio OX=7955 GN=dlb PE=1 SV=1 && PF00008:EGF-like domain|PF01414:Delta serrate ligand|PF07645:Calcium-binding EGF domain
Cg11056	1.47305	13.8216	2.0509	1.44588	0.761766	- && - && -
Cg11066	166.69	127.653	255.104	173.741	119.087	- && sp|Q14624|ITIH4_HUMAN Inter-alpha-trypsin inhibitor heavy chain H4 OS=Homo sapiens OX=9606 GN=ITIH4 PE=1 SV=4 && PF08487:Vault protein inter-alpha-trypsin domain|PF00092:von Willebrand factor type A domain
Cg11068	1.39933	1.80841	0.687983	1.98771	1.17725	- && sp|Q76FK4|NOL8_HUMAN Nucleolar protein 8 OS=Homo sapiens OX=9606 GN=NOL8 PE=1 SV=1 && -
Cg11089	0	3.10632	0.0659229	0.0629566	0.689623	- && - && -
Cg11091	0	0.0280743	1.12164	0	0.211303	- && - && -
Cg11098	13.8199	6.1991	15.5611	14.1932	14.2302	- && sp|Q8IZD9|DOCK3_HUMAN Dedicator of cytokinesis protein 3 OS=Homo sapiens OX=9606 GN=DOCK3 PE=1 SV=1 && PF07653:Variant SH3 domain|PF06920:Dock homology region 2|PF16172:DOCK N-terminus|PF14429:C2 domain in Dock180 and Zizimin proteins
Cg11101	0	0	0.600022	9.41816	99.7904	- && - && PF12906:RING-variant domain
Cg11103	53.6729	54.2953	199.651	41.0192	44.9378	- && sp|Q9BXW7|HDHD5_HUMAN Haloacid dehalogenase-like hydrolase domain-containing 5 OS=Homo sapiens OX=9606 GN=HDHD5 PE=1 SV=1 && PF13344:Haloacid dehalogenase-like hydrolase
Cg11107	0	0.135989	0.147152	0.357853	0.0406151	- && - && PF00754:F5/8 type C domain
Cg11131	5.43942	13.9481	5.44356	24.5303	16.7621	- && sp|Q96C86|DCPS_HUMAN m7GpppX diphosphatase OS=Homo sapiens OX=9606 GN=DCPS PE=1 SV=2 && PF11969:Scavenger mRNA decapping enzyme C-term binding|PF05652:Scavenger mRNA decapping enzyme (DcpS) N-terminal
Cg11152	0.0257976	0.0125688	0.0550845	0.746959	13.352	- && - && PF13855:Leucine rich repeat
Cg11173	0.110188	0.182052	1.14721	0.0528764	0.697101	- && sp|Q921A2|MYCT_RAT Proton myo-inositol cotransporter OS=Rattus norvegicus OX=10116 GN=Slc2a13 PE=1 SV=2 && PF00083:Sugar (and other) transporter
Cg11174	1.76252	1.66186	3.5812	2.11726	0.331965	- && sp|P18845|ACHA3_CARAU Neuronal acetylcholine receptor subunit alpha-3 OS=Carassius auratus OX=7957 GN=chrna3 PE=2 SV=1 && PF02932:Neurotransmitter-gated ion-channel transmembrane region|PF02931:Neurotransmitter-gated ion-channel ligand binding domain
Cg11175	0.0154607	0.184237	1.96814	0.626014	0.184408	- && sp|P09480|ACHA2_CHICK Neuronal acetylcholine receptor subunit alpha-2 OS=Gallus gallus OX=9031 GN=CHRNA2 PE=2 SV=1 && PF02932:Neurotransmitter-gated ion-channel transmembrane region|PF02931:Neurotransmitter-gated ion-channel ligand binding domain
Cg11177	33.1601	66.3006	26.2104	25.1036	28.075	- && - && -
Cg11184	23.6256	7.57765	20.1386	21.3714	20.7305	- && sp|P98174|FGD1_HUMAN FYVE, RhoGEF and PH domain-containing protein 1 OS=Homo sapiens OX=9606 GN=FGD1 PE=1 SV=2 && PF00621:RhoGEF domain|PF01363:FYVE zinc finger
Cg11192	0.255875	0.879039	0.178603	0.243924	0.304837	- && sp|Q9BIW4|LIMD_DICDI LIM domain-containing protein D OS=Dictyostelium discoideum OX=44689 GN=limD PE=2 SV=1 && PF00412:LIM domain
Cg11198	6.92592	3.10326	6.80162	4.26366	6.78218	- && sp|Q3SY69|AL1L2_HUMAN Mitochondrial 10-formyltetrahydrofolate dehydrogenase OS=Homo sapiens OX=9606 GN=ALDH1L2 PE=1 SV=2 && PF00551:Formyl transferase|PF00171:Aldehyde dehydrogenase family|PF02911:Formyl transferase, C-terminal domain
Cg11200	0.94535	1.00895	2.60565	0.682253	2.12503	- && sp|O93297|CP2K4_ONCMY Cytochrome P450 2K4 OS=Oncorhynchus mykiss OX=8022 GN=cyp2k4 PE=2 SV=1 && PF01146:Caveolin|PF00067:Cytochrome P450
Cg11207	0	0.392616	0	0	0	- && sp|Q2IBC1|CAV1_RHIFE Caveolin-1 OS=Rhinolophus ferrumequinum OX=59479 GN=CAV1 PE=3 SV=1 && PF01146:Caveolin
Cg11212	0.312	49.1502	6.11123	17.0825	30.1989	- && - && PF01146:Caveolin
Cg11216	0.0637271	6.78594	8.43076	0	5.09985	- && sp|Q2IBC2|CAV2_RHIFE Caveolin-2 OS=Rhinolophus ferrumequinum OX=59479 GN=CAV2 PE=3 SV=1 && PF01146:Caveolin
Cg11218	11.1543	9.11137	34.2522	41.4061	14.587	- && - && PF01146:Caveolin
Cg11219	3.72072	0.850849	6.99523	6.59323	3.756	- && - && PF01146:Caveolin
Cg11222	0	0.0121617	0.527654	0.36742	0.142599	- && sp|Q9UA35|S28A3_EPTST Solute carrier family 28 member 3 OS=Eptatretus stoutii OX=7765 GN=SLC28A3 PE=2 SV=1 && PF07670:Nucleoside recognition|PF07662:Na+ dependent nucleoside transporter C-terminus|PF01773:Na+ dependent nucleoside transporter N-terminus
Cg11238	6.39753	2.29902	4.87274	6.83171	8.03162	- && sp|P29375|KDM5A_HUMAN Lysine-specific demethylase 5A OS=Homo sapiens OX=9606 GN=KDM5A PE=1 SV=3 && PF00628:PHD-finger|PF02928:C5HC2 zinc finger|PF02373:JmjC domain, hydroxylase|PF08429:PLU-1-like protein|PF01388:ARID/BRIGHT DNA binding domain|PF02375:jmjN domain
Cg11251	10.2549	24.1183	8.88121	6.05676	4.08502	- && - && -
Cg11261	1.4929	1.40369	0.136747	1.00971	0.653597	- && sp|Q95JD5|ST1B1_CANLF Sulfotransferase family cytosolic 1B member 1 OS=Canis lupus familiaris OX=9615 GN=SULT1B1 PE=1 SV=1 && PF00685:Sulfotransferase domain
Cg11266	0.714381	0.969793	1.54964	2.17659	0.44185	- && - && PF00078:Reverse transcriptase (RNA-dependent DNA polymerase)
Cg11269	0.538095	1.19545	0.274006	0.840036	0.466519	- && - && PF08017:Fibrinogen binding protein|PF11669:WW domain-binding protein 1
Cg11272	0.269306	0.100444	0	0.0233835	18.3003	- && - && -
Cg11287	1.81381	4.34072	1.78824	0.629223	1.00551	- && - && -
Cg11297	0.404418	0.220822	1.50519	0.527211	0.56136	- && sp|A3KMV5|UBA1_BOVIN Ubiquitin-like modifier-activating enzyme 1 OS=Bos taurus OX=9913 GN=UBA1 PE=2 SV=1 && PF00899:ThiF family|PF10585:Ubiquitin-activating enzyme active site|PF09358:Ubiquitin fold domain
Cg11311	13.9264	6.27549	15.4011	12.4907	18.0917	- && sp|Q05209|PTN12_HUMAN Tyrosine-protein phosphatase non-receptor type 12 OS=Homo sapiens OX=9606 GN=PTPN12 PE=1 SV=3 && PF00102:Protein-tyrosine phosphatase
Cg11333	41.6341	36.3295	78.2763	27.7012	9.94488	- && sp|P46434|GST1_ONCVO Glutathione S-transferase 1 (Fragment) OS=Onchocerca volvulus OX=6282 GN=GST1 PE=1 SV=1 && PF14497:Glutathione S-transferase, C-terminal domain|PF02798:Glutathione S-transferase, N-terminal domain
Cg11334	33.9479	101.514	26.0469	34.4634	37.974	- && sp|P27012|SCRY4_ENTDO S-crystallin 4 OS=Enteroctopus dofleini OX=267067 PE=2 SV=1 && PF02798:Glutathione S-transferase, N-terminal domain|PF14497:Glutathione S-transferase, C-terminal domain
Cg11337	3.74601	2.1461	6.01451	3.26399	3.55047	- && sp|Q99758|ABCA3_HUMAN Phospholipid-transporting ATPase ABCA3 OS=Homo sapiens OX=9606 GN=ABCA3 PE=1 SV=2 && PF00005:ABC transporter|PF12698:ABC-2 family transporter protein
Cg11344	6.4087	15.5441	14.3896	1.83627	45.7864	- && - && PF16977:C-terminal domain of apextrin
Cg11346	0	0.971715	0.533941	0	3.5576	- && - && PF16977:C-terminal domain of apextrin
Cg11350	0.488693	0.261877	1.20783	0.934634	0.0245902	- && sp|O14514|AGRB1_HUMAN Adhesion G protein-coupled receptor B1 OS=Homo sapiens OX=9606 GN=ADGRB1 PE=1 SV=2 && PF16489:GPCR-Autoproteolysis INducing (GAIN) domain|PF01825:GPCR proteolysis site, GPS, motif|PF00002:7 transmembrane receptor (Secretin family)
Cg11357	0.274077	0.0918474	0.577711	0.489085	0.0233753	- && sp|O14514|AGRB1_HUMAN Adhesion G protein-coupled receptor B1 OS=Homo sapiens OX=9606 GN=ADGRB1 PE=1 SV=2 && PF01825:GPCR proteolysis site, GPS, motif|PF00002:7 transmembrane receptor (Secretin family)|PF01403:Sema domain|PF16489:GPCR-Autoproteolysis INducing (GAIN) domain
Cg11360	0.703805	0.400836	0.55872	4.82913	0.596836	- && - && -
Cg11363	12.3577	2.28039	7.25323	14.698	14.1574	- && sp|Q9V4A7|PLXB_DROME Plexin-B OS=Drosophila melanogaster OX=7227 GN=PlexB PE=1 SV=2 && PF08337:Plexin cytoplasmic RasGAP domain|PF01833:IPT/TIG domain|PF01403:Sema domain
Cg11378	36.6209	159.739	57.8877	4.83321	47.9399	- && - && -
Cg11381	82.3916	61.5077	138.01	88.2056	75.5753	- && sp|P53348|BTG1_BOVIN Protein BTG1 OS=Bos taurus OX=9913 GN=BTG1 PE=2 SV=2 && PF07742:BTG family
Cg11383	74.0486	336.944	118.377	6.62116	98.0361	- && - && -
Cg11395	3.95317	5.61548	9.02811	9.57782	1.14029	- && sp|P45377|ALD2_MOUSE Aldose reductase-related protein 2 OS=Mus musculus OX=10090 GN=Akr1b8 PE=1 SV=2 && PF00248:Aldo/keto reductase family
Cg11420	32.4258	10.3467	20.8568	11.378	11.9293	- && - && -
Cg11421	4.144	1.92031	9.08252	4.52642	2.87424	- && - && -
Cg11449	0.766195	0.518849	0.541407	0	1.89491	- && - && PF01683:EB module
Cg11450	0.595466	0.374478	1.40449	0.0722504	1.19176	- && - && PF01683:EB module
Cg11453	6.73839	4.54955	3.11562	0.160598	2.54601	- && - && -
Cg11462	0.029279	0.443758	0	0.134426	0.858951	- && - && -
Cg11471	0.858961	2.33563	0.239113	1.04082	0.0569658	- && sp|Q14191|WRN_HUMAN Werner syndrome ATP-dependent helicase OS=Homo sapiens OX=9606 GN=WRN PE=1 SV=2 && PF00271:Helicase conserved C-terminal domain|PF00270:DEAD/DEAH box helicase
Cg11472	0.30769	0.918113	0	1.07344	0.143353	- && - && -
Cg11504	0.388115	0.843096	0.0931764	0.148035	0.36707	- && sp|O43301|HS12A_HUMAN Heat shock 70 kDa protein 12A OS=Homo sapiens OX=9606 GN=HSPA12A PE=1 SV=2 && -
Cg11509	2.3065	7.1593	1.58677	10.5594	7.4251	- && - && -
Cg11511	39.7568	33.5425	38.0961	11.6788	41.3747	- && sp|Q91VR8|BRK1_MOUSE Protein BRICK1 OS=Mus musculus OX=10090 GN=Brk1 PE=1 SV=1 && -
Cg11548	0.13957	18.1324	0.571974	0.494022	1.66902	- && - && -
Cg11549	0.121316	9.50774	0.349283	0.0790136	0.165813	- && - && -
Cg11588	0.39029	0	1.53388	1.58449	0.353242	- && - && PF00386:C1q domain
Cg11600	0	1.27748	0.0243085	0.0606842	0	- && - && -
Cg11609	2.32642	0	1.58459	1.03868	0.469857	- && - && -
Cg11611	1.42568	6.05102	1.79146	6.49879	1.20416	- && sp|Q9D8P7|TF3C6_MOUSE General transcription factor 3C polypeptide 6 OS=Mus musculus OX=10090 GN=Gtf3c6 PE=2 SV=1 && PF10419:TFIIIC subunit triple barrel domain
Cg11620	1.37449	1.67679	0.476964	0.886761	0.693021	- && - && -
Cg11638	0.631995	0.126755	0.0418312	0.00703362	0.267201	- && - && PF01607:Chitin binding Peritrophin-A domain
Cg11647	0.95183	0.449558	0.24726	0.0375095	0.756269	- && - && PF01607:Chitin binding Peritrophin-A domain
Cg11662	0.0559742	0	0.369173	0	0.0260703	- && - && -
Cg11663	1.00102	2.25418	1.41102	2.16196	0.568959	- && sp|Q9D8P7|TF3C6_MOUSE General transcription factor 3C polypeptide 6 OS=Mus musculus OX=10090 GN=Gtf3c6 PE=2 SV=1 && PF10419:TFIIIC subunit triple barrel domain
Cg11666	0.0818617	1.08847	0	0.978989	0.949728	- && - && -
Cg11724	0.727019	0.204862	2.76768	0.205897	0	- && - && PF07707:BTB And C-terminal Kelch|PF01344:Kelch motif
Cg11731	439.363	884.099	116.477	714.29	314.562	- && - && PF00386:C1q domain
Cg11732	0.763394	3.20027	0.788396	2.96911	1.54641	- && sp|Q13507|TRPC3_HUMAN Short transient receptor potential channel 3 OS=Homo sapiens OX=9606 GN=TRPC3 PE=1 SV=3 && PF08344:Transient receptor ion channel II|PF00520:Ion transport protein
Cg11736	206.209	136.32	307.015	134.68	199.601	- && - && -
Cg11764	0.229748	0.293385	0.194685	0.408617	2.17381	- && sp|Q8WXX0|DYH7_HUMAN Dynein axonemal heavy chain 7 OS=Homo sapiens OX=9606 GN=DNAH7 PE=1 SV=2 && PF08393:Dynein heavy chain, N-terminal region 2|PF12777:Microtubule-binding stalk of dynein motor|PF12780:P-loop containing dynein motor region D4|PF17857:AAA+ lid domain|PF12775:P-loop containing dynein motor region|PF17852:Dynein heavy chain AAA lid domain|PF03028:Dynein heavy chain region D6 P…
Cg11765	0.70261	2.21478	1.82884	1.24412	5.32754	- && sp|Q4R6T7|IQUB_MACFA IQ and ubiquitin-like domain-containing protein OS=Macaca fascicularis OX=9541 GN=IQUB PE=2 SV=2 && PF00240:Ubiquitin family
Cg11768	0.67654	2.10773	0.308876	29.8059	13.2596	- && - && -
Cg11774	0.0708899	0.313274	0	0	0	- && - && -
Cg11828	3.44697	2.59285	9.82109	0.844353	1.083	- && - && PF00059:Lectin C-type domain
Cg11841	2.98719	6.10449	1.34005	0.499653	4.42079	- && - && -
Cg11856	1.88893	0.484955	3.64171	3.35356	2.65523	- && - && -
Cg11872	1.98233	0	3.8884	0.169442	0.235375	- && - && PF00656:Caspase domain|PF00035:Double-stranded RNA binding motif
Cg11901	0.410175	1.0093	0.0840189	0.108164	0.455176	- && sp|P24453|CP1A2_MESAU Cytochrome P450 1A2 OS=Mesocricetus auratus OX=10036 GN=CYP1A2 PE=1 SV=4 && PF00067:Cytochrome P450
Cg11909	0	0.0480632	0.019045	0	0.461042	- && - && -
Cg11910	0.0627648	0.0113786	0.38236	0.0120296	0.149145	- && - && -
Cg11911	0.542708	0.64728	0.090509	0.212343	0.126764	- && sp|Q08BL7|GLCTK_DANRE Glycerate kinase OS=Danio rerio OX=7955 GN=glyctk PE=2 SV=1 && PF05161:MOFRL family|PF13660:Domain of unknown function (DUF4147)
Cg11916	2.91077	2.4442	6.97792	5.37313	5.13257	- && - && PF12796:Ankyrin repeats (3 copies)|PF00754:F5/8 type C domain
Cg11940	0.361452	0.899575	0.0383285	0.0237599	0.0404461	- && - && -
Cg11950	0.764444	1.61998	0.372364	0.954016	1.38122	- && - && PF03747:ADP-ribosylglycohydrolase
Cg11954	1.77435	5.01759	1.08641	3.89611	3.49888	- && - && -
Cg11960	1.11285	1.98101	0.508816	2.2409	1.72552	- && sp|A4IF63|TRIM2_BOVIN Tripartite motif-containing protein 2 OS=Bos taurus OX=9913 GN=TRIM2 PE=2 SV=1 && PF13445:RING-type zinc-finger
Cg11966	9.28137	12.3661	33.7642	6.00751	7.66915	- && sp|D3YXG0|HMCN1_MOUSE Hemicentin-1 OS=Mus musculus OX=10090 GN=Hmcn1 PE=1 SV=1 && PF00090:Thrombospondin type 1 domain
Cg11985	0	0	1.63422	0	2.33894	- && - && PF03221:Tc5 transposase DNA-binding domain|PF03184:DDE superfamily endonuclease
Cg12018	0.0699539	0.696808	0.0321102	1.02001	0.0225084	- && - && -
Cg12028	0.117739	1.28208	0.212262	5.29429	0.333478	- && sp|P79081|ATS1_SCHPO N-acetyltransferase ats1 OS=Schizosaccharomyces pombe (strain 972 / ATCC 24843) OX=284812 GN=ats1 PE=2 SV=1 && PF00583:Acetyltransferase (GNAT) family
Cg12031	158.27	125.09	561.858	86.3647	126.499	- && - && PF00965:Tissue inhibitor of metalloproteinase
Cg12033	11.381	10.7456	25.3407	16.1734	5.67831	- && sp|Q16651|PRSS8_HUMAN Prostasin OS=Homo sapiens OX=9606 GN=PRSS8 PE=1 SV=1 && PF00089:Trypsin
Cg12059	1.07087	1.52251	0.0700094	0.125113	1.98254	- && sp|O07619|YHFT_BACSU Uncharacterized acyl--CoA ligase YhfT OS=Bacillus subtilis (strain 168) OX=224308 GN=yhfT PE=2 SV=1 && PF00501:AMP-binding enzyme
Cg12076	1.78923	0.250329	0.51436	2.23943	0.0569658	- && - && -
Cg12077	9.73651	0.0553204	0.850195	0.0943309	2.51426	- && - && -
Cg12093	1.36852	4.14763	1.38526	3.873	0.217158	- && - && -
Cg12102	0.155867	0	0	0.717311	0	- && - && -
Cg12109	9.5491	32.5496	8.23887	54.235	28.9781	- && sp|A7SBN6|ZGPAT_NEMVE Zinc finger CCCH-type with G patch domain-containing protein OS=Nematostella vectensis OX=45351 GN=v1g244155 PE=3 SV=1 && PF01585:G-patch domain|PF00692:dUTPase
Cg12114	0.0759965	0.0310245	0.0158606	0.529377	0	- && sp|G3X987|GIMA9_MOUSE GTPase IMAP family member 9 OS=Mus musculus OX=10090 GN=Gimap9 PE=1 SV=1 && PF04548:AIG1 family
Cg12120	1.42204	0.96932	0	0.737808	0.452961	- && sp|P97355|SPSY_MOUSE Spermine synthase OS=Mus musculus OX=10090 GN=Sms PE=1 SV=1 && PF17284:Spermidine synthase tetramerisation domain|PF01564:Spermine/spermidine synthase domain
Cg12158	4.44151	1.55693	2.99573	3.64308	0.783457	- && sp|Q9W5Y0|NEP3_DROME Neprilysin-3 OS=Drosophila melanogaster OX=7227 GN=Nep3 PE=2 SV=2 && PF05649:Peptidase family M13|PF01431:Peptidase family M13
Cg12171	0.723175	0.692366	0	2.35612	0.56977	- && sp|Q1ZXD6|ROCO5_DICDI Probable serine/threonine-protein kinase roco5 OS=Dictyostelium discoideum OX=44689 GN=roco5 PE=3 SV=1 && PF08477:Ras of Complex, Roc, domain of DAPkinase|PF16095:C-terminal of Roc, COR, domain
Cg12192	9.58286	14.0074	5.96044	4.42171	8.00883	- && sp|Q8CFA2|GCST_MOUSE Aminomethyltransferase, mitochondrial OS=Mus musculus OX=10090 GN=Amt PE=1 SV=1 && PF08669:Glycine cleavage T-protein C-terminal barrel domain|PF01571:Aminomethyltransferase folate-binding domain
Cg12224	1.17938	0	0.424525	0	0.0566347	- && - && -
Cg12235	4.53556	4.86662	5.22286	6.07716	2.25119	- && - && -
Cg12266	4.24486	3.8129	7.65386	5.01598	3.83625	- && sp|Q9WUN2|TBK1_MOUSE Serine/threonine-protein kinase TBK1 OS=Mus musculus OX=10090 GN=Tbk1 PE=1 SV=1 && PF18396:TANK binding kinase 1 ubiquitin-like domain|PF00069:Protein kinase domain|PF18394:TANK-binding kinase 1 coiled-coil domain 1
Cg12268	2.45023	0.718519	3.46533	1.62077	3.33154	- && - && PF01607:Chitin binding Peritrophin-A domain
Cg12302	65.0494	38.7077	99.9339	85.7939	48.9564	- && sp|Q95078|CP18A_DROME Cytochrome P450 18a1 OS=Drosophila melanogaster OX=7227 GN=Cyp18a1 PE=2 SV=2 && PF00067:Cytochrome P450
Cg12316	0.0961711	0	0	0	1.4049	- && sp|Q9WTS8|FCN1_RAT Ficolin-1 OS=Rattus norvegicus OX=10116 GN=Fcn1 PE=2 SV=2 && PF00147:Fibrinogen beta and gamma chains, C-terminal globular domain
Cg12319	2.83489	0.980991	2.89754	2.85145	3.21144	- && sp|Q24118|PIGE_DROME Protein pigeon OS=Drosophila melanogaster OX=7227 GN=pigeon PE=2 SV=2 && PF14959:gamma-Secretase-activating protein C-term
Cg12324	21.6896	9.32848	17.2227	3.17083	8.47348	- && - && PF17064:Sleepless protein
Cg12325	14.6655	4.72951	9.82396	16.9551	13.7923	- && sp|P23634|AT2B4_HUMAN Plasma membrane calcium-transporting ATPase 4 OS=Homo sapiens OX=9606 GN=ATP2B4 PE=1 SV=2 && PF12424:Plasma membrane calcium transporter ATPase C terminal|PF00335:Tetraspanin family|PF00689:Cation transporting ATPase, C-terminus|PF00690:Cation transporter/ATPase, N-terminus|PF13246:Cation transport ATPase (P-type)|PF00122:E1-E2 ATPase
Cg12339	2.0346	19.8028	5.47576	10.0216	14.9157	- && - && -
Cg12342	0.708637	0	2.70141	0	2.27431	- && - && -
Cg12351	66.765	10.9191	92.2883	17.2678	57.5363	- && - && -
Cg12353	0.778497	0	13.5572	1.17909	1.23038	- && - && PF00754:F5/8 type C domain
Cg12361	0.737909	0.17832	1.67194	2.39173	0.957207	- && - && -
Cg12380	1.13217	0.826312	1.90327	1.77431	0.672786	- && sp|C6KFA3|AGRG6_DANRE Adhesion G-protein coupled receptor G6 OS=Danio rerio OX=7955 GN=adgrg6 PE=1 SV=1 && PF00008:EGF-like domain|PF00002:7 transmembrane receptor (Secretin family)|PF00028:Cadherin domain
Cg12382	0.450828	0.665937	0.223461	4.58435	0.923796	- && - && -
Cg12392	19.6256	3.62199	9.48114	3.68083	0.0987001	- && - && -
Cg12424	17.4672	8.46725	20.1291	15.7862	19.5493	- && sp|P11881|ITPR1_MOUSE Inositol 1,4,5-trisphosphate receptor type 1 OS=Mus musculus OX=10090 GN=Itpr1 PE=1 SV=2 && PF01365:RIH domain|PF08454:RyR and IP3R Homology associated|PF08709:Inositol 1,4,5-trisphosphate/ryanodine receptor|PF02815:MIR domain|PF00520:Ion transport protein
Cg12432	47.3352	15.1933	34.3996	22.1743	12.9603	- && - && -
Cg12476	5.69267	9.0686	3.40293	7.01205	7.14265	- && sp|G3V9D0|PGLT1_RAT Protein O-glucosyltransferase 1 OS=Rattus norvegicus OX=10116 GN=Poglut1 PE=3 SV=1 && PF05686:Glycosyl transferase family 90
Cg12492	0.0337978	0.0832642	0	0.0117429	0.210096	- && - && PF01683:EB module
Cg12534	11.93	14.293	12.2001	3.32129	10.42	- && - && -
Cg12551	0.0772449	0.15066	0.0405788	0.841011	0.0174781	- && sp|Q09660|CC44_CAEEL Probable cytochrome P450 CYP44 OS=Caenorhabditis elegans OX=6239 GN=cyp-44A1 PE=3 SV=2 && PF00067:Cytochrome P450
Cg12575	0.208208	1.08723	0.3147	0.186888	0.28367	- && sp|Q54KD0|Y7407_DICDI TPR repeat-containing protein DDB_G0287407 OS=Dictyostelium discoideum OX=44689 GN=DDB_G0287407 PE=4 SV=1 && PF13271:Domain of unknown function (DUF4062)|PF05729:NACHT domain|PF04300:F-box associated region|PF13424:Tetratricopeptide repeat
Cg12576	1.8706	3.157	0.717058	0.137715	1.07475	- && - && PF05186:Dpy-30 motif
Cg12591	0.500263	0.0830018	0.729115	1.06988	0.301525	- && sp|Q9LZF7|OTU10_ARATH OVARIAN TUMOR DOMAIN-containing deubiquitinating enzyme 10 OS=Arabidopsis thaliana OX=3702 GN=OTU10 PE=1 SV=1 && PF02338:OTU-like cysteine protease|PF03281:Mab-21 protein
Cg12600	0.368182	0.43883	0.0243574	0.0211001	0.141465	- && - && PF03281:Mab-21 protein
Cg12607	26.8734	116.481	28.8579	29.6533	45.6558	- && - && PF04505:Interferon-induced transmembrane protein
Cg12615	0.102994	0.531728	0.0319047	0.0222909	0.0418011	- && sp|A6NJT0|UNC4_HUMAN Homeobox protein unc-4 homolog OS=Homo sapiens OX=9606 GN=UNCX PE=3 SV=1 && PF00046:Homeodomain
Cg12619	1.68855	1.72677	2.28373	1.30621	2.68667	- && sp|Q0VG85|CC162_MOUSE Coiled-coil domain-containing protein 162 OS=Mus musculus OX=10090 GN=Ccdc162 PE=1 SV=4 && PF15082:Domain of unknown function (DUF4549)
Cg12621	0	0.702816	0	0.0458324	0.427421	- && - && -
Cg12626	0.321357	1.62996	0	0	0.0849293	- && - && -
Cg12635	41.1501	31.4342	77.6449	25.655	58.7469	- && - && PF00582:Universal stress protein family
Cg12638	8.13475	15.5786	5.265	2.2402	2.78112	- && - && PF00582:Universal stress protein family
Cg12645	0.0399742	0.115547	0.173853	0.0744627	0.816064	- && sp|Q14831|GRM7_HUMAN Metabotropic glutamate receptor 7 OS=Homo sapiens OX=9606 GN=GRM7 PE=1 SV=1 && PF07562:Nine Cysteines Domain of family 3 GPCR|PF00003:7 transmembrane sweet-taste receptor of 3 GCPR|PF01094:Receptor family ligand binding region
Cg12651	0.4497	3.4003	0.918144	0.151572	0.456738	- && - && PF08685:GON domain
Cg12652	1.39762	7.08285	1.45501	3.59196	1.59623	- && - && PF00386:C1q domain
Cg12654	0	0	1.14588	0.380743	4.32584	- && - && PF00386:C1q domain
Cg12671	2.32151	0.49604	2.6621	1.50487	2.25398	- && - && PF01683:EB module
Cg12672	4.08033	2.36539	8.60007	5.16259	2.61665	- && - && PF01683:EB module|PF08685:GON domain
Cg12712	0.329668	0	0.680958	3.86507	0.0795557	- && - && -
Cg12714	4.63768	2.32497	6.97375	4.31175	4.74759	- && - && PF13855:Leucine rich repeat
Cg12721	0.316481	0.65833	0	0	1.10931	- && - && PF00386:C1q domain
Cg12729	0	0.0438214	0.111467	0.683034	5.47993	- && - && -
Cg12754	0	0.174483	0.118743	0.608746	8.0209	- && - && -
Cg12755	1.59549	3.79025	1.23787	0.801683	0.779316	- && - && PF15115:Domain of unknown function with conserved HDNR motif
Cg12767	0.720035	2.13164	0.0489595	0.241881	0.249231	- && - && -
Cg12789	1.14812	1.07203	2.12308	22.9251	136.854	- && - && -
Cg12796	1.46158	4.43518	1.55529	1.43044	1.84152	- && sp|Q2KHU0|SERB_BOVIN Phosphoserine phosphatase OS=Bos taurus OX=9913 GN=PSPH PE=2 SV=1 && PF00702:haloacid dehalogenase-like hydrolase
Cg12797	0	0.59373	0	1.05158	0.0851712	- && - && -
Cg12800	0.478433	2.49509	0.695809	0.985454	1.74393	- && sp|P39022|RAD52_CHICK DNA repair protein RAD52 homolog OS=Gallus gallus OX=9031 GN=RAD52 PE=2 SV=1 && PF04098:Rad52/22 family double-strand break repair protein
Cg12801	38.3362	6.88586	18.6245	15.4562	12.1311	- && sp|O15083|ERC2_HUMAN ERC protein 2 OS=Homo sapiens OX=9606 GN=ERC2 PE=1 SV=3 && PF10174:RIM-binding protein of the cytomatrix active zone
Cg12842	22.7236	8.74077	30.0054	34.5015	40.4715	- && - && PF06625:Protein of unknown function (DUF1151)
Cg12847	72.8319	65.6964	234.881	81.9779	79.612	- && - && PF12796:Ankyrin repeats (3 copies)
Cg12854	0	0.18345	0.261389	2.7525	20.1694	- && - && -
Cg12884	177.985	110.944	259.222	156.888	247.988	- && - && -
Cg12892	0.117416	1.32733	0.270857	0.418609	0.351002	- && - && PF00431:CUB domain
Cg12900	0.457867	0.602926	0.541143	0.164444	0.921296	- && sp|Q96N23|CFA54_HUMAN Cilia- and flagella-associated protein 54 OS=Homo sapiens OX=9606 GN=CFAP54 PE=2 SV=3 && PF14858:Domain of unknown function (DUF4486)
Cg12902	59.0295	9.27919	28.837	26.9567	28.4058	- && sp|Q7Z6B7|SRGP1_HUMAN SLIT-ROBO Rho GTPase-activating protein 1 OS=Homo sapiens OX=9606 GN=SRGAP1 PE=1 SV=1 && PF00611:Fes/CIP4, and EFC/F-BAR homology domain|PF00018:SH3 domain|PF00620:RhoGAP domain
Cg12906	0	0.279332	0	1.70096	39.6224	- && sp|Q6JEL2|KLH10_HUMAN Kelch-like protein 10 OS=Homo sapiens OX=9606 GN=KLHL10 PE=1 SV=1 && PF00651:BTB/POZ domain|PF01344:Kelch motif|PF07707:BTB And C-terminal Kelch
Cg12926	10.7745	26.5162	9.7918	17.0416	44.2419	- && sp|Q9D581|EFC10_MOUSE EF-hand calcium-binding domain-containing protein 10 OS=Mus musculus OX=10090 GN=Efcab10 PE=1 SV=1 && PF17819:Family of unknown function (DUF5582)
Cg12928	1.69714	1.08855	5.73367	9.71011	6.61006	- && sp|P10394|POL4_DROME Retrovirus-related Pol polyprotein from transposon 412 OS=Drosophila melanogaster OX=7227 GN=POL PE=4 SV=1 && PF17919:RNase H-like domain found in reverse transcriptase|PF00078:Reverse transcriptase (RNA-dependent DNA polymerase)|PF00665:Integrase core domain|PF07534:TLD|PF17921:Integrase zinc binding domain
Cg12937	3.05984	0.505806	2.38048	1.30427	0.948037	- && sp|Q53G44|IF44L_HUMAN Interferon-induced protein 44-like OS=Homo sapiens OX=9606 GN=IFI44L PE=2 SV=3 && PF07534:TLD|PF01926:50S ribosome-binding GTPase
Cg12942	2.40078	0.106369	3.05729	0.712214	0.139173	- && sp|Q8BV66|IFI44_MOUSE Interferon-induced protein 44 OS=Mus musculus OX=10090 GN=Ifi44 PE=2 SV=1 && PF01926:50S ribosome-binding GTPase|PF07534:TLD
Cg12956	2.67869	1.05377	4.73932	1.06578	0.694381	- && sp|Q9BDB7|IF44L_MOUSE Interferon-induced protein 44-like OS=Mus musculus OX=10090 GN=Ifi44l PE=2 SV=2 && PF07534:TLD
Cg12973	1.95122	0.266906	9.17784	1.90849	0.836307	- && sp|Q9BDB7|IF44L_MOUSE Interferon-induced protein 44-like OS=Mus musculus OX=10090 GN=Ifi44l PE=2 SV=2 && PF07534:TLD
Cg12974	2.05509	0.102885	4.84867	1.15751	0.975899	- && sp|Q8BV66|IFI44_MOUSE Interferon-induced protein 44 OS=Mus musculus OX=10090 GN=Ifi44 PE=2 SV=1 && PF07534:TLD|PF00735:Septin
Cg12987	26.0612	117.889	8.93712	11.9978	18.9745	- && - && -
Cg13012	0.847827	0.0517348	8.08743	1.95602	0	- && - && -
Cg13024	31.178	24.1211	59.4615	67.9565	55.5367	- && sp|P05370|G6PD_RAT Glucose-6-phosphate 1-dehydrogenase OS=Rattus norvegicus OX=10116 GN=G6pdx PE=1 SV=3 && PF02781:Glucose-6-phosphate dehydrogenase, C-terminal domain|PF00479:Glucose-6-phosphate dehydrogenase, NAD binding domain
Cg13032	1.62819	0.788936	2.88165	0.501793	2.78014	- && sp|Q9QUK3|CLN8_MOUSE Protein CLN8 OS=Mus musculus OX=10090 GN=Cln8 PE=1 SV=1 && PF03798:TLC domain
Cg13040	0	0	0.505852	0.0297132	0.858327	- && sp|Q98ST7|MOXD1_CHICK DBH-like monooxygenase protein 1 OS=Gallus gallus OX=9031 GN=MOXD1 PE=2 SV=1 && PF01082:Copper type II ascorbate-dependent monooxygenase, N-terminal domain|PF03712:Copper type II ascorbate-dependent monooxygenase, C-terminal domain|PF03351:DOMON domain
Cg13045	0.92671	0	0.363721	1.58449	0.0480649	- && - && PF02931:Neurotransmitter-gated ion-channel ligand binding domain
Cg13059	0	0.152743	1.77545	0.444075	0.0958025	- && - && -
Cg13067	5.48131	2.39034	11.8161	11.056	5.15965	- && sp|P55866|CASP3_XENLA Caspase-3 OS=Xenopus laevis OX=8355 GN=casp3 PE=2 SV=1 && PF00656:Caspase domain
Cg13070	0.771902	2.12422	0.0800332	1.11829	0.742408	- && sp|P09479|ACHA_CHICK Acetylcholine receptor subunit alpha OS=Gallus gallus OX=9031 GN=CHRNA1 PE=1 SV=1 && PF02931:Neurotransmitter-gated ion-channel ligand binding domain|PF02932:Neurotransmitter-gated ion-channel transmembrane region
Cg13080	0.149599	0.014475	0.736284	0.154082	0.406435	- && sp|Q98ST7|MOXD1_CHICK DBH-like monooxygenase protein 1 OS=Gallus gallus OX=9031 GN=MOXD1 PE=2 SV=1 && PF03351:DOMON domain|PF01082:Copper type II ascorbate-dependent monooxygenase, N-terminal domain|PF03712:Copper type II ascorbate-dependent monooxygenase, C-terminal domain
Cg13091	1.72521	2.27886	8.28019	2.89424	1.24404	- && sp|Q22328|LEV9_CAEEL Protein lev-9 OS=Caenorhabditis elegans OX=6239 GN=lev-9 PE=1 SV=3 && PF00084:Sushi repeat (SCR repeat)
Cg13093	111.322	63.3954	141.549	64.66	58.0394	- && - && PF05760:Immediate early response protein (IER)
Cg13113	3.60166	3.73889	9.35271	5.05791	4.85553	- && sp|Q96LT4|SAMD8_HUMAN Sphingomyelin synthase-related protein 1 OS=Homo sapiens OX=9606 GN=SAMD8 PE=1 SV=2 && PF14360:PAP2 superfamily C-terminal|PF00536:SAM domain (Sterile alpha motif)
Cg13118	12.6797	12.5951	20.7654	10.6059	37.398	- && sp|Q63421|PDE1C_RAT Calcium/calmodulin-dependent 3',5'-cyclic nucleotide phosphodiesterase 1C OS=Rattus norvegicus OX=10116 GN=Pde1c PE=1 SV=1 && PF00233:3'5'-cyclic nucleotide phosphodiesterase|PF08499:3'5'-cyclic nucleotide phosphodiesterase N-terminal
Cg13123	69.1687	25.3745	93.0657	31.33	29.2178	- && - && -
Cg13124	95.5642	33.163	120.196	81.9881	22.0789	- && - && -
Cg13127	113.138	212.654	77.4531	114.209	79.5622	- && - && -
Cg13188	1.07306	6.81616	0.819728	0.596202	0.258844	- && - && -
Cg13196	0.525572	0.701182	0.255171	0.0216955	0.60406	- && - && -
Cg13203	0.703164	1.62277	1.72726	0.294157	2.60233	- && - && -
Cg13204	0.209873	0.0382142	0.245921	0.129741	1.35088	- && - && PF17517:IgGFc binding protein
Cg13208	4.6037	6.05693	12.8658	5.64939	3.56459	- && sp|Q03412|UNC7_CAEEL Innexin unc-7 OS=Caenorhabditis elegans OX=6239 GN=unc-7 PE=1 SV=1 && PF00876:Innexin
Cg13210	15.4489	6.72155	13.9846	10.2276	10.0662	- && - && -
Cg13211	11.275	11.2692	22.0293	16.1941	16.0991	- && sp|Q03412|UNC7_CAEEL Innexin unc-7 OS=Caenorhabditis elegans OX=6239 GN=unc-7 PE=1 SV=1 && PF00481:Protein phosphatase 2C|PF00876:Innexin
Cg13221	63.812	46.7076	108.73	70.7509	81.2467	- && - && PF12796:Ankyrin repeats (3 copies)
Cg13223	0.795722	0.201603	1.56567	1.38173	1.39401	- && sp|A6NMZ7|CO6A6_HUMAN Collagen alpha-6(VI) chain OS=Homo sapiens OX=9606 GN=COL6A6 PE=1 SV=2 && PF00092:von Willebrand factor type A domain|PF00431:CUB domain
Cg13233	0.614159	0.601462	0.0724446	0.085597	0.229217	- && sp|Q8NDA2|HMCN2_HUMAN Hemicentin-2 OS=Homo sapiens OX=9606 GN=HMCN2 PE=2 SV=3 && PF07679:Immunoglobulin I-set domain|PF13927:Immunoglobulin domain
Cg13251	0	0.150437	0.618107	0.0651069	1.92115	- && - && -
Cg13262	1.90472	0.997469	2.30037	2.44606	0.63737	- && - && -
Cg13273	16.6164	11.7921	8.70211	4.31666	11.8962	- && sp|H2A0L8|FND2_PINMG Fibronectin type III domain-containing protein 2 OS=Margaritifera margaritifera OX=102329 PE=1 SV=1 && PF00041:Fibronectin type III domain
Cg13276	4.43202	1.22118	2.70931	6.1735	4.74896	- && sp|O75165|DJC13_HUMAN DnaJ homolog subfamily C member 13 OS=Homo sapiens OX=9606 GN=DNAJC13 PE=1 SV=5 && PF00226:DnaJ domain|PF14237:GYF domain 2
Cg13294	24.6959	6.85076	21.2619	20.4293	20.5006	- && sp|Q13905|RPGF1_HUMAN Rap guanine nucleotide exchange factor 1 OS=Homo sapiens OX=9606 GN=RAPGEF1 PE=1 SV=3 && PF00618:RasGEF N-terminal motif|PF00617:RasGEF domain
Cg13298	1.27725	3.46543	0.384531	0.167558	0.479536	- && sp|O15439|MRP4_HUMAN ATP-binding cassette sub-family C member 4 OS=Homo sapiens OX=9606 GN=ABCC4 PE=1 SV=3 && PF00005:ABC transporter|PF00664:ABC transporter transmembrane region
Cg13315	0.244599	0	0.491265	0	0.521016	- && sp|E9Q236|MRP4_MOUSE ATP-binding cassette sub-family C member 4 OS=Mus musculus OX=10090 GN=Abcc4 PE=1 SV=1 && PF00664:ABC transporter transmembrane region
Cg13329	5.89221	7.56189	3.6183	9.51024	10.7515	- && - && -
Cg13332	12.4363	24.3638	9.22451	88.6138	68.1558	- && sp|Q28FE4|MORN5_XENTR MORN repeat-containing protein 5 OS=Xenopus tropicalis OX=8364 GN=morn5 PE=2 SV=1 && PF02493:MORN repeat
Cg13341	8.96727	13.7505	5.64054	6.01561	10.2691	- && - && PF03747:ADP-ribosylglycohydrolase
Cg13350	5.50257	2.41643	5.00906	7.13601	7.40165	- && sp|Q80ZI6|LRSM1_MOUSE E3 ubiquitin-protein ligase LRSAM1 OS=Mus musculus OX=10090 GN=Lrsam1 PE=1 SV=1 && PF00536:SAM domain (Sterile alpha motif)|PF13855:Leucine rich repeat|PF13920:Zinc finger, C3HC4 type (RING finger)
Cg13353	20.874	21.8002	158.272	63.0904	62.149	- && - && PF00020:TNFR/NGFR cysteine-rich region
Cg13370	0	0.67822	1.04257	0.416585	0	- && sp|Q99315|YG31B_YEAST Transposon Ty3-G Gag-Pol polyprotein OS=Saccharomyces cerevisiae (strain ATCC 204508 / S288c) OX=559292 GN=TY3B-G PE=1 SV=3 && PF17921:Integrase zinc binding domain|PF17919:RNase H-like domain found in reverse transcriptase|PF00078:Reverse transcriptase (RNA-dependent DNA polymerase)
Cg13383	1.05142	0.857586	0.803593	0.0124829	0.736368	- && - && PF00589:Phage integrase family
Cg13400	0.034658	0.601597	0.0208274	0.440618	0.590782	- && sp|Q8K0U4|HS12A_MOUSE Heat shock 70 kDa protein 12A OS=Mus musculus OX=10090 GN=Hspa12a PE=1 SV=1 && PF00012:Hsp70 protein
Cg13402	0.606924	0.623409	4.0424	2.82364	0.586118	- && - && -
Cg13404	10.5901	5.84001	12.9884	9.4187	8.46457	- && sp|Q8AVC3|G6PT3_XENLA Glucose-6-phosphate exchanger SLC37A2 OS=Xenopus laevis OX=8355 GN=slc37a2 PE=2 SV=1 && PF07690:Major Facilitator Superfamily
Cg13411	4.62441	2.05628	4.68405	3.39891	3.37007	- && sp|Q7ZUW2|HYOU1_DANRE Hypoxia up-regulated protein 1 OS=Danio rerio OX=7955 GN=hyou1 PE=2 SV=1 && PF00012:Hsp70 protein
Cg13420	2022.65	1152.27	10852.7	2279.72	1974.94	- && sp|P81491|SAA5_MESAU Serum amyloid A-5 protein OS=Mesocricetus auratus OX=10036 PE=1 SV=1 && PF00277:Serum amyloid A protein
Cg13424	7.88945	22.8989	9.96346	38.9379	28.1857	- && sp|Q0P5A5|CKS1_BOVIN Cyclin-dependent kinases regulatory subunit 1 OS=Bos taurus OX=9913 GN=CKS1B PE=3 SV=1 && -
Cg13425	0	0.0283116	0	0.318789	0.0221468	- && sp|Q07553|GCY3E_DROME Guanylate cyclase 32E OS=Drosophila melanogaster OX=7227 GN=Gyc32E PE=1 SV=4 && PF07701:Heme NO binding associated|PF00211:Adenylate and Guanylate cyclase catalytic domain|PF08376:Nitrate and nitrite sensing
Cg13444	14.2207	29.1113	13.0481	19.3615	14.5952	- && sp|B5FYQ0|ARL3_TAEGU ADP-ribosylation factor-like protein 3 OS=Taeniopygia guttata OX=59729 GN=ARL3 PE=2 SV=1 && PF00025:ADP-ribosylation factor family
Cg13457	10.7294	80.8931	17.4649	5.34773	3.73788	- && sp|P11833|TBB_PARLI Tubulin beta chain OS=Paracentrotus lividus OX=7656 PE=2 SV=1 && PF00091:Tubulin/FtsZ family, GTPase domain|PF03953:Tubulin C-terminal domain
Cg13458	0.0504424	0.836357	0.0202086	0.167274	0.436238	- && - && -
Cg13467	2.49617	4.84416	1.93468	3.87623	4.76047	- && sp|Q0P4I1|CEP44_XENTR Centrosomal protein of 44 kDa OS=Xenopus tropicalis OX=8364 GN=cep44 PE=2 SV=1 && PF15007:Centrosomal spindle body, CEP44
Cg13471	3311.22	6894.01	4834.19	2486.3	4883.65	- && - && -
Cg13477	1.1111	1.55688	1.008	0.117376	1.84163	- && - && -
Cg13482	3.80306	0.441679	2.28066	2.02186	3.62593	- && sp|Q90252|MTR_RHIMB Mesotocin receptor OS=Rhinella marina OX=8386 PE=2 SV=1 && PF00001:7 transmembrane receptor (rhodopsin family)
Cg13490	128.93	47.1332	99.1046	90.0619	80.8048	- && sp|Q14596|NBR1_HUMAN Next to BRCA1 gene 1 protein OS=Homo sapiens OX=9606 GN=NBR1 PE=1 SV=3 && PF00569:Zinc finger, ZZ type|PF00564:PB1 domain|PF16158:Ig-like domain from next to BRCA1 gene
Cg13494	0.427936	0.449383	0	0.236852	0.0157393	- && sp|Q18932|CAH2_CAEEL Putative carbonic anhydrase-like protein 2 OS=Caenorhabditis elegans OX=6239 GN=cah-2 PE=1 SV=3 && PF00194:Eukaryotic-type carbonic anhydrase
Cg13521	10.683	19.9265	8.15318	8.67072	10.5239	- && - && -
Cg13527	6.29847	3.60965	9.32166	5.93171	5.44118	- && sp|Q6QGW5|SRA1_RAT Steroid receptor RNA activator 1 OS=Rattus norvegicus OX=10116 GN=Sra1 PE=1 SV=1 && PF07304:Steroid receptor RNA activator (SRA1)
Cg13529	0.96222	4.28074	1.35005	2.33366	1.57529	- && sp|Q63016|LAT1_RAT Large neutral amino acids transporter small subunit 1 OS=Rattus norvegicus OX=10116 GN=Slc7a5 PE=1 SV=2 && PF13520:Amino acid permease
Cg13551	3.07847	13.581	3.54981	31.7655	23.3871	- && sp|Q59LN9|CENPA_CANAL Histone H3-like centromeric protein CSE4 OS=Candida albicans (strain SC5314 / ATCC MYA-2876) OX=237561 GN=CSE4 PE=3 SV=1 && PF00125:Core histone H2A/H2B/H3/H4
Cg13565	0.0269499	0.125103	0.121774	0.114055	1.80173	- && sp|Q8BRG6|KLH24_MOUSE Kelch-like protein 24 OS=Mus musculus OX=10090 GN=Klhl24 PE=2 SV=2 && PF07707:BTB And C-terminal Kelch|PF00651:BTB/POZ domain|PF01344:Kelch motif
Cg13596	15.3431	10.9927	64.5406	30.3701	33.4634	- && sp|Q20929|DMSR1_CAEEL G-protein coupled receptor dmsr-1 OS=Caenorhabditis elegans OX=6239 GN=dmsr-1 PE=1 SV=1 && PF10324:Serpentine type 7TM GPCR chemoreceptor Srw
Cg13606	1.78324	3.98759	7.01298	0.232183	1.42041	- && sp|Q8VDT1|SC5A9_MOUSE Sodium/glucose cotransporter 4 OS=Mus musculus OX=10090 GN=Slc5a9 PE=1 SV=3 && PF00474:Sodium:solute symporter family
Cg13618	7.99352	3.62369	10.2175	10.1795	2.50941	- && - && -
Cg13646	2.42456	4.69736	2.0926	2.11919	2.01178	- && - && -
Cg13651	1.15928	5.44329	1.48114	7.83262	4.42786	- && sp|B8V7S0|CPP1_ACRMI CUB and peptidase domain-containing protein 1 (Fragment) OS=Acropora millepora OX=45264 PE=1 SV=1 && PF00089:Trypsin
Cg13670	0.803772	2.45502	0.918431	0.694691	0.913133	- && sp|Q9EP89|LACTB_MOUSE Serine beta-lactamase-like protein LACTB, mitochondrial OS=Mus musculus OX=10090 GN=Lactb PE=1 SV=1 && PF00144:Beta-lactamase
Cg13686	0.79023	2.36779	1.95782	1.00638	15.7794	- && sp|Q60997|DMBT1_MOUSE Deleted in malignant brain tumors 1 protein OS=Mus musculus OX=10090 GN=Dmbt1 PE=1 SV=2 && PF00100:Zona pellucida-like domain|PF00530:Scavenger receptor cysteine-rich domain
Cg13687	0.111143	0.479624	0.315674	0.296028	5.25178	- && sp|O14522|PTPRT_HUMAN Receptor-type tyrosine-protein phosphatase T OS=Homo sapiens OX=9606 GN=PTPRT PE=1 SV=6 && PF00102:Protein-tyrosine phosphatase|PF00041:Fibronectin type III domain
Cg13730	3.46683	0.751395	2.01558	0.705278	1.0595	- && - && PF07679:Immunoglobulin I-set domain|PF13927:Immunoglobulin domain
Cg13736	6.30809	9.58778	4.07035	9.76436	5.77317	- && sp|P32896|PDC2_YEAST Protein PDC2 OS=Saccharomyces cerevisiae (strain ATCC 204508 / S288c) OX=559292 GN=PDC2 PE=1 SV=2 && PF03184:DDE superfamily endonuclease|PF03221:Tc5 transposase DNA-binding domain
Cg13745	1.32514	1.43838	12.7175	16.0322	1.02611	- && - && PF13359:DDE superfamily endonuclease
Cg13763	0.695265	0.177308	0.54906	1.13248	0.177332	- && sp|G5EBX9|PPE_CAEEL Serine/threonine-protein phosphatase with EF-hands pef-1 OS=Caenorhabditis elegans OX=6239 GN=pef-1 PE=1 SV=1 && PF00149:Calcineurin-like phosphoesterase|PF08321:PPP5 TPR repeat region|PF13499:EF-hand domain pair
Cg13794	0.150253	0.572419	0.0649815	0.478336	0.283831	- && sp|Q8VHR0|PCD18_MOUSE Protocadherin 18 OS=Mus musculus OX=10090 GN=Pcdh18 PE=1 SV=2 && PF00028:Cadherin domain|PF08266:Cadherin-like
Cg13809	0.935284	1.24371	0.808605	2.62302	0.888481	- && sp|Q02153|GCYB1_HUMAN Guanylate cyclase soluble subunit beta-1 OS=Homo sapiens OX=9606 GN=GUCY1B1 PE=1 SV=1 && PF00211:Adenylate and Guanylate cyclase catalytic domain|PF07700:Haem-NO-binding|PF07701:Heme NO binding associated
Cg13810	1.70248	0.73692	3.95525	1.70565	0.447806	- && - && -
Cg13811	6.18247	0.638829	9.47446	8.17448	3.4759	- && - && -
Cg13812	5.2352	2.91618	9.8987	2.81472	0.744067	- && sp|Q9JLB4|CUBN_MOUSE Cubilin OS=Mus musculus OX=10090 GN=Cubn PE=1 SV=3 && PF00431:CUB domain
Cg13829	1.84124	0.341275	0.168892	1.60954	0.259918	- && - && -
Cg13830	6.47903	2.88017	10.0462	11.4817	5.3458	- && - && PF08205:CD80-like C2-set immunoglobulin domain
Cg13861	5.86696	3.86279	7.51296	5.66546	5.3369	- && sp|P57088|TMM33_HUMAN Transmembrane protein 33 OS=Homo sapiens OX=9606 GN=TMEM33 PE=1 SV=2 && PF03661:Transmembrane protein 33/Nucleoporin POM33
Cg13875	6.22064	2.2703	6.94589	18.1749	8.19584	- && - && -
Cg13889	11.2346	15.8656	7.40448	8.96805	6.51141	- && sp|Q5DRA8|PCDGG_PANTR Protocadherin gamma-B4 OS=Pan troglodytes OX=9598 GN=PCDHGB4 PE=3 SV=1 && PF00028:Cadherin domain
Cg13899	43.53	20.247	46.0939	27.9196	24.9865	- && sp|P70705|ATP7A_RAT Copper-transporting ATPase 1 OS=Rattus norvegicus OX=10116 GN=Atp7a PE=1 SV=1 && PF00403:Heavy-metal-associated domain|PF00122:E1-E2 ATPase|PF00702:haloacid dehalogenase-like hydrolase
Cg13910	30.981	18.8544	36.7971	49.5166	65.9643	- && sp|Q96PQ7|KLHL5_HUMAN Kelch-like protein 5 OS=Homo sapiens OX=9606 GN=KLHL5 PE=1 SV=3 && PF00651:BTB/POZ domain|PF01344:Kelch motif|PF07707:BTB And C-terminal Kelch
Cg13913	71.9993	175.025	49.48	176.582	76.3187	- && - && PF08661:Replication factor A protein 3
Cg13925	4.36689	9.28963	3.85339	5.14524	4.32771	- && - && -
Cg13931	11.0374	6.35154	19.8253	18.5646	30.0406	- && sp|Q9VF87|CYFIP_DROME Cytoplasmic FMR1-interacting protein OS=Drosophila melanogaster OX=7227 GN=Sra-1 PE=1 SV=1 && PF05994:Cytoplasmic Fragile-X interacting family
Cg13932	25.2614	14.8224	33.7717	27.3866	34.5139	- && sp|Q9VF87|CYFIP_DROME Cytoplasmic FMR1-interacting protein OS=Drosophila melanogaster OX=7227 GN=Sra-1 PE=1 SV=1 && PF05994:Cytoplasmic Fragile-X interacting family|PF07159:Protein of unknown function (DUF1394)
Cg13963	7.79841	13.5485	6.4452	14.5259	9.09685	- && - && PF05609:Lamina-associated polypeptide 1C (LAP1C)
Cg13972	0.104389	2.71904	0.704455	0.521827	0.860295	- && sp|Q6X0I2|VGR_SOLIN Vitellogenin receptor OS=Solenopsis invicta OX=13686 GN=VgR PE=2 SV=1 && PF14670:Coagulation Factor Xa inhibitory site|PF00057:Low-density lipoprotein receptor domain class A
Cg13973	0.124978	0.940727	0	0.183569	0.431566	- && sp|O73917|PAX6_ORYLA Paired box protein Pax-6 OS=Oryzias latipes OX=8090 GN=pax6 PE=2 SV=1 && PF00292:'Paired box' domain|PF00046:Homeodomain
Cg13979	11.6886	32.7981	15.4144	24.3615	20.3391	- && - && PF06172:Cupin superfamily (DUF985)
Cg13984	0.565615	3.2259	0.35945	1.257	0.504361	- && sp|P55006|RDH7_RAT Retinol dehydrogenase 7 OS=Rattus norvegicus OX=10116 GN=Rdh7 PE=1 SV=1 && PF00106:short chain dehydrogenase
Cg13991	0.0783663	0.0432119	0	0.0190067	0.293587	- && sp|G5EBQ8|CHS2_CAEEL Chitin synthase chs-2 OS=Caenorhabditis elegans OX=6239 GN=chs-2 PE=1 SV=1 && PF03142:Chitin synthase
Cg13995	0.139406	0.927895	0.480425	0.519141	0	- && sp|P30532|ACHA5_HUMAN Neuronal acetylcholine receptor subunit alpha-5 OS=Homo sapiens OX=9606 GN=CHRNA5 PE=1 SV=2 && PF02931:Neurotransmitter-gated ion-channel ligand binding domain|PF02932:Neurotransmitter-gated ion-channel transmembrane region
Cg13999	0.25517	0.024053	0.593219	3.13064	0.240648	- && - && PF02698:DUF218 domain
Cg14003	4.79937	7.63821	3.28046	6.22594	5.75274	- && sp|O08688|CAN5_MOUSE Calpain-5 OS=Mus musculus OX=10090 GN=Capn5 PE=1 SV=1 && PF01067:Calpain large subunit, domain III|PF00648:Calpain family cysteine protease|PF00168:C2 domain
Cg14010	28.5474	33.1298	14.512	11.549	17.205	- && sp|Q9NWM8|FKB14_HUMAN Peptidyl-prolyl cis-trans isomerase FKBP14 OS=Homo sapiens OX=9606 GN=FKBP14 PE=1 SV=1 && PF00254:FKBP-type peptidyl-prolyl cis-trans isomerase|PF13499:EF-hand domain pair
Cg14012	1.94125	1.49268	0.0849081	0.552613	0	- && sp|Q09575|YRD6_CAEEL Uncharacterized protein K02A2.6 OS=Caenorhabditis elegans OX=6239 GN=K02A2.6 PE=4 SV=1 && PF17921:Integrase zinc binding domain|PF00665:Integrase core domain|PF00078:Reverse transcriptase (RNA-dependent DNA polymerase)
Cg14021	0.156867	0	0	0	3.83336	- && - && -
Cg14023	0.312487	0	0.293646	1.08435	0.114473	- && - && PF13383:Methyltransferase domain
Cg14026	0.257763	0.687383	0.0882344	1.35111	1.53461	- && - && PF13383:Methyltransferase domain
Cg14027	3.92459	22.4925	4.10277	7.67157	6.54828	- && - && -
Cg14033	11.5592	12.9608	4.87392	24.6345	16.1587	- && sp|Q1T769|MIS12_CHICK Protein MIS12 homolog OS=Gallus gallus OX=9031 GN=MIS12 PE=2 SV=1 && PF05859:Mis12 protein
Cg14035	1.45144	0.213033	1.4752	2.24721	1.1822	- && sp|P20735|GGT1_PIG Glutathione hydrolase 1 proenzyme OS=Sus scrofa OX=9823 GN=GGT1 PE=2 SV=1 && PF01019:Gamma-glutamyltranspeptidase
Cg14044	1.31751	1.78298	0.736479	0.845199	1.30013	- && sp|Q5T8I3|F102B_HUMAN Protein FAM102B OS=Homo sapiens OX=9606 GN=FAM102B PE=1 SV=2 && PF12895:Anaphase-promoting complex, cyclosome, subunit 3
Cg14045	8.02187	1.97426	5.08102	5.96557	4.1348	- && sp|Q6GNM6|F102A_XENLA Protein FAM102A OS=Xenopus laevis OX=8355 GN=fam102a PE=2 SV=1 && PF10358:N-terminal C2 in EEIG1 and EHBP1 proteins
Cg14057	8.98224	7.1457	11.9005	9.3456	24.2117	- && sp|Q9CWP6|MSPD2_MOUSE Motile sperm domain-containing protein 2 OS=Mus musculus OX=10090 GN=Mospd2 PE=1 SV=2 && PF00635:MSP (Major sperm protein) domain|PF00650:CRAL/TRIO domain
Cg14122	1.13295	0.966948	0.967491	0.625227	1.68856	- && sp|Q9Y5A7|NUB1_HUMAN NEDD8 ultimate buster 1 OS=Homo sapiens OX=9606 GN=NUB1 PE=1 SV=2 && PF18037:Ubiquitin-like domain
Cg14137	0	0.0391819	0	0.0866205	4.93416	- && - && -
Cg14156	2.89228	2.57151	12.9128	0.068297	1.36577	- && - && PF00059:Lectin C-type domain
Cg14157	0.169625	1.07186	2.09591	0	2.8097	- && - && PF00059:Lectin C-type domain
Cg14158	2.42018	2.36695	8.70181	4.39259	2.04065	- && - && -
Cg14169	0	2.28384	0	0.158341	0.0989764	- && - && PF09772:Transmembrane protein 26
Cg14174	0.0942836	0.102172	0.0751598	0.756242	5.12591	- && - && -
Cg14187	0.152829	0.327784	0.207562	0	0.421673	- && - && PF10469:AKAP7 2'5' RNA ligase-like domain
Cg14199	39.8543	10.7592	30.4271	17.2811	16.0126	- && sp|Q704S8|CACP_RAT Carnitine O-acetyltransferase OS=Rattus norvegicus OX=10116 GN=Crat PE=1 SV=1 && PF00755:Choline/Carnitine o-acyltransferase
Cg14214	12.0897	31.8728	86.4384	16.1243	1.7624	- && - && -
Cg14221	6.41122	8.30801	2.84978	3.27497	4.29687	- && sp|Q96MM6|HS12B_HUMAN Heat shock 70 kDa protein 12B OS=Homo sapiens OX=9606 GN=HSPA12B PE=1 SV=2 && PF00012:Hsp70 protein
Cg14230	1.91705	3.34265	1.42083	2.80107	2.09349	- && sp|Q30NT6|ANMK_SULDN Anhydro-N-acetylmuramic acid kinase OS=Sulfurimonas denitrificans (strain ATCC 33889 / DSM 1251) OX=326298 GN=anmK PE=3 SV=1 && PF03702:Anhydro-N-acetylmuramic acid kinase
Cg14241	3.22664	1.76557	3.86963	5.21792	5.40519	- && sp|Q5F361|TBCK_CHICK TBC domain-containing protein kinase-like protein OS=Gallus gallus OX=9031 GN=TBCK PE=2 SV=2 && PF00566:Rab-GTPase-TBC domain|PF00581:Rhodanese-like domain|PF00069:Protein kinase domain
Cg14245	4.35774	2.95523	12.5182	2.39295	0.935967	- && sp|Q9BXS9|S26A6_HUMAN Solute carrier family 26 member 6 OS=Homo sapiens OX=9606 GN=SLC26A6 PE=1 SV=1 && PF00916:Sulfate permease family|PF01740:STAS domain
Cg14276	25.2929	8.56675	18.0563	17.2631	22.9597	- && - && -
Cg14297	10.1224	2.6965	1.84786	1.89697	7.88321	- && sp|Q60847|COCA1_MOUSE Collagen alpha-1(XII) chain OS=Mus musculus OX=10090 GN=Col12a1 PE=2 SV=3 && PF00008:EGF-like domain|PF00092:von Willebrand factor type A domain|PF00084:Sushi repeat (SCR repeat)
Cg14298	48.6717	15.8858	38.0414	43.9155	82.953	- && sp|P16109|LYAM3_HUMAN P-selectin OS=Homo sapiens OX=9606 GN=SELP PE=1 SV=3 && PF00084:Sushi repeat (SCR repeat)|PF02494:HYR domain|PF00008:EGF-like domain|PF07699:Putative ephrin-receptor like|PF00090:Thrombospondin type 1 domain
Cg14322	23.3441	92.0524	23.4589	30.0891	39.656	- && sp|Q1ZZU3|SWI5_HUMAN DNA repair protein SWI5 homolog OS=Homo sapiens OX=9606 GN=SWI5 PE=1 SV=1 && PF07061:Swi5
Cg14340	6.04808	4.178	8.33379	5.98158	7.51289	- && sp|Q8K0U4|HS12A_MOUSE Heat shock 70 kDa protein 12A OS=Mus musculus OX=10090 GN=Hspa12a PE=1 SV=1 && -
Cg14341	2.84622	3.57579	7.88433	6.16533	10.8221	- && sp|Q8K0U4|HS12A_MOUSE Heat shock 70 kDa protein 12A OS=Mus musculus OX=10090 GN=Hspa12a PE=1 SV=1 && PF00012:Hsp70 protein
Cg14358	194.195	76.2021	170.915	144.337	94.7545	- && sp|O35186|CATK_RAT Cathepsin K OS=Rattus norvegicus OX=10116 GN=Ctsk PE=2 SV=1 && PF00112:Papain family cysteine protease|PF08246:Cathepsin propeptide inhibitor domain (I29)
Cg14365	2.35177	0.16747	2.00924	3.30396	0.983899	- && - && -
Cg14381	1.55203	2.777	0.830028	3.50781	1.91623	- && - && -
Cg14402	0.0854138	1.4587	0.119747	0.138191	0.0536785	- && - && -
Cg14427	8.52711	4.87479	12.956	7.43088	6.84747	- && - && PF04970:Lecithin retinol acyltransferase
Cg14432	16.9852	22.7087	8.83142	8.94297	15.17	- && - && PF15341:Ribosome biogenesis protein SLX9
Cg14434	0.177812	1.37577	0.0801504	0.037054	0.0171639	- && - && PF09772:Transmembrane protein 26
Cg14436	1.51453	0.382839	3.39995	1.90757	0.605398	- && - && PF17517:IgGFc binding protein
Cg14440	2.26118	3.98784	0.804415	2.13728	1.22367	- && sp|Q6Q7X9|KLH31_DANRE Kelch-like protein 31 OS=Danio rerio OX=7955 GN=klhl31 PE=2 SV=1 && PF07707:BTB And C-terminal Kelch|PF00651:BTB/POZ domain
Cg14441	1.08296	6.52211	0.176899	0.839956	1.5117	- && sp|Q2WGJ6|KLH38_HUMAN Kelch-like protein 38 OS=Homo sapiens OX=9606 GN=KLHL38 PE=1 SV=3 && PF01344:Kelch motif
Cg14455	4.84474	6.76502	1.58877	3.54733	6.91148	- && - && -
Cg14457	1.54141	0.874374	2.53158	0.2217	0.278938	- && - && PF08336:Prolyl 4-Hydroxylase alpha-subunit, N-terminal region
Cg14474	46.5643	23.345	63.4114	45.1744	60.1556	- && - && PF00092:von Willebrand factor type A domain
Cg14480	0	1.45726	0.0304157	0.029047	0	- && sp|Q02053|UBA1_MOUSE Ubiquitin-like modifier-activating enzyme 1 OS=Mus musculus OX=10090 GN=Uba1 PE=1 SV=1 && PF10585:Ubiquitin-activating enzyme active site|PF00899:ThiF family
Cg14490	5.44247	6.09434	3.74755	2.02659	0.420995	- && sp|Q05557|CRYAB_ANAPL Alpha-crystallin B chain OS=Anas platyrhynchos OX=8839 GN=CRYAB PE=2 SV=1 && PF00011:Hsp20/alpha crystallin family
Cg14491	2.81788	0.594395	1.59169	1.70615	1.83721	- && - && PF02864:STAT protein, DNA binding domain
Cg14497	17.0501	9.83058	10.5891	1.76457	11.3107	- && - && -
Cg14517	0.059356	0.577014	0.0769587	0.195662	0.179578	- && sp|Q6NSJ0|MYORG_HUMAN Myogenesis-regulating glycosidase OS=Homo sapiens OX=9606 GN=MYORG PE=1 SV=2 && PF01055:Glycosyl hydrolases family 31
Cg14520	0.328475	1.16585	0.273452	0.341799	0.433858	- && sp|O88533|DDC_MOUSE Aromatic-L-amino-acid decarboxylase OS=Mus musculus OX=10090 GN=Ddc PE=1 SV=1 && PF00282:Pyridoxal-dependent decarboxylase conserved domain
Cg14525	1.26392	2.77023	1.15301	2.63484	1.03005	- && sp|Q9DBQ9|SWT1_MOUSE Transcriptional protein SWT1 OS=Mus musculus OX=10090 GN=Swt1 PE=2 SV=3 && PF13638:PIN domain|PF00397:WW domain
Cg14531	0.34765	0	5.37485	5.3802	1.0361	- && - && -
Cg14532	1.35858	1.7973	0.613901	2.07579	2.96572	- && sp|P98164|LRP2_HUMAN Low-density lipoprotein receptor-related protein 2 OS=Homo sapiens OX=9606 GN=LRP2 PE=1 SV=3 && PF14670:Coagulation Factor Xa inhibitory site
Cg14544	214.191	150.307	384.751	201.901	143.972	- && - && -
Cg14547	1.62061	0.588458	3.74362	2.0393	1.50645	- && - && PF00169:PH domain|PF00779:BTK motif|PF00017:SH2 domain|PF14604:Variant SH3 domain
Cg14557	0	0.200272	0.0954077	0	0.197922	- && sp|P26591|GLRK_LYMST Glutamate receptor OS=Lymnaea stagnalis OX=6523 PE=2 SV=1 && PF00060:Ligand-gated ion channel|PF10613:Ligated ion channel L-glutamate- and glycine-binding site|PF01094:Receptor family ligand binding region
Cg14575	8.87792	8.61522	3.6756	6.27861	2.93084	- && sp|Q2KIJ2|MET18_BOVIN Histidine protein methyltransferase 1 homolog OS=Bos taurus OX=9913 GN=METTL18 PE=2 SV=1 && PF10294:Lysine methyltransferase
Cg14604	0	0	0.779091	0.715056	0.135476	- && sp|Q6IMN6|CAPR2_HUMAN Caprin-2 OS=Homo sapiens OX=9606 GN=CAPRIN2 PE=1 SV=1 && PF00386:C1q domain
Cg14609	11.4048	21.5135	14.6694	3.00964	17.0764	- && sp|Q8VIG3|RSPH1_MOUSE Radial spoke head 1 homolog OS=Mus musculus OX=10090 GN=Rsph1 PE=1 SV=2 && PF02493:MORN repeat
Cg14612	1965.88	3360.29	1020.83	519.65	2033.58	- && sp|Q8ITC3|RS19_ARGIR 40S ribosomal protein S19 OS=Argopecten irradians OX=31199 GN=RPS19 PE=2 SV=1 && PF01090:Ribosomal protein S19e
Cg14613	0.0755284	1.29824	0.0811726	0.410256	3.23812	- && sp|Q9H1Q7|PED1A_HUMAN PC-esterase domain-containing protein 1A OS=Homo sapiens OX=9606 GN=PCED1A PE=1 SV=1 && -
Cg14621	0.0515832	0.0576288	0.149618	0.133766	1.21014	- && sp|Q91XQ0|DYH8_MOUSE Dynein axonemal heavy chain 8 OS=Mus musculus OX=10090 GN=Dnah8 PE=1 SV=2 && PF08385:Dynein heavy chain, N-terminal region 1|PF03184:DDE superfamily endonuclease
Cg14624	0.208814	0.10499	0.126753	0.406354	4.19812	- && sp|Q91XQ0|DYH8_MOUSE Dynein axonemal heavy chain 8 OS=Mus musculus OX=10090 GN=Dnah8 PE=1 SV=2 && PF12774:Hydrolytic ATP binding site of dynein motor region|PF12781:ATP-binding dynein motor region|PF12780:P-loop containing dynein motor region D4|PF17852:Dynein heavy chain AAA lid domain|PF17857:AAA+ lid domain|PF12775:P-loop containing dynein motor region|PF12777:Microtubule-binding stalk of…
Cg14632	3.76492	0.8036	2.15802	4.01204	2.78543	- && sp|E9QAT4|SC16A_MOUSE Protein transport protein Sec16A OS=Mus musculus OX=10090 GN=Sec16a PE=1 SV=1 && PF12932:Vesicle coat trafficking protein Sec16 mid-region|PF12931:Sec23-binding domain of Sec16
Cg14633	0.385757	1.7044	0.253245	0.127595	0.167306	- && - && -
Cg14638	11.943	4.80454	27.7916	5.14922	9.64053	- && - && PF15297:Cytoskeleton-associated protein 2 C-terminus
Cg14643	0.956258	0.316687	0.45243	1.20264	0.142216	- && - && -
Cg14648	6.96732	17.2041	5.64213	3.13925	10.9577	- && - && -
Cg14658	0.300123	0.316254	0.295763	0.0460565	0.497093	- && sp|V5NAL9|TLR4_PINIB Toll-like receptor 4 OS=Pinctada imbricata OX=66713 PE=2 SV=1 && PF13676:TIR domain|PF13855:Leucine rich repeat
Cg14671	481.94	250.376	500.476	268.411	290.55	- && sp|P28648|CD63_RAT CD63 antigen OS=Rattus norvegicus OX=10116 GN=Cd63 PE=1 SV=2 && PF00335:Tetraspanin family
Cg14672	4.18572	13.1883	9.80601	10.8053	48.3534	- && sp|B2RY50|ODAD2_MOUSE Outer dynein arm-docking complex subunit 2 OS=Mus musculus OX=10090 GN=Odad2 PE=1 SV=1 && PF00514:Armadillo/beta-catenin-like repeat
Cg14675	3.13972	3.7904	3.83052	1.39703	5.98622	- && sp|A5YM72|CRNS1_HUMAN Carnosine synthase 1 OS=Homo sapiens OX=9606 GN=CARNS1 PE=1 SV=3 && PF13535:ATP-grasp domain
Cg14701	3.46195	8.64329	2.78434	2.18355	12.1739	- && sp|P90666|TXND3_HELCR Thioredoxin domain-containing protein 3 homolog OS=Heliocidaris crassispina OX=1043166 GN=NME8 PE=1 SV=1 && PF00085:Thioredoxin|PF00334:Nucleoside diphosphate kinase
Cg14705	1.16413	3.23722	1.28749	3.7731	13.1554	- && sp|Q8WXX0|DYH7_HUMAN Dynein axonemal heavy chain 7 OS=Homo sapiens OX=9606 GN=DNAH7 PE=1 SV=2 && PF17852:Dynein heavy chain AAA lid domain|PF12774:Hydrolytic ATP binding site of dynein motor region|PF03028:Dynein heavy chain region D6 P-loop domain|PF12781:ATP-binding dynein motor region|PF18199:Dynein heavy chain C-terminal domain|PF12780:P-loop containing dynein motor region D4|PF08393:Dyn…
Cg14715	1.66226	3.51235	1.36036	1.71933	1.44329	- && sp|A2ASS6|TITIN_MOUSE Titin OS=Mus musculus OX=10090 GN=Ttn PE=1 SV=1 && PF07679:Immunoglobulin I-set domain
Cg14734	0.0464998	0.0618104	0.288673	0.611909	0.0179542	- && - && PF17517:IgGFc binding protein
Cg14737	0	0	0	0.0405137	1.7289	- && - && -
Cg14766	0.0993149	9.63871	7.05132	10.5084	33.3149	- && - && -
Cg14767	4.04137	22.468	8.26332	3.22732	5.68567	- && sp|P20073|ANXA7_HUMAN Annexin A7 OS=Homo sapiens OX=9606 GN=ANXA7 PE=1 SV=3 && PF00191:Annexin
Cg14773	4.36713	4.43704	11.4319	2.29434	3.21182	- && - && -
Cg14775	44.9274	40.2605	163.454	57.1298	46.9928	- && - && -
Cg14781	0.76207	2.21892	0.348247	0.872387	0.151575	- && sp|G5EBR3|GLUCL_CAEEL Glutamate-gated chloride channel alpha OS=Caenorhabditis elegans OX=6239 GN=glc-1 PE=1 SV=1 && PF02932:Neurotransmitter-gated ion-channel transmembrane region|PF02931:Neurotransmitter-gated ion-channel ligand binding domain
Cg14791	7.30172	5.92431	18.7193	3.19983	11.8271	- && sp|Q7TSF2|VGLU3_RAT Vesicular glutamate transporter 3 OS=Rattus norvegicus OX=10116 GN=Slc17a8 PE=1 SV=2 && PF07690:Major Facilitator Superfamily
Cg14793	1.62346	3.02521	0.974157	1.45956	1.25959	- && sp|Q68G38|TOR1A_RAT Torsin-1A OS=Rattus norvegicus OX=10116 GN=Tor1a PE=1 SV=1 && PF06309:Torsin
Cg14799	0.535678	0.121285	1.61098	0.0243753	0	- && sp|Q8K0U4|HS12A_MOUSE Heat shock 70 kDa protein 12A OS=Mus musculus OX=10090 GN=Hspa12a PE=1 SV=1 && -
Cg14806	4.28296	11.7984	3.93584	20.9765	57.0458	- && sp|Q62252|SP17_MOUSE Sperm surface protein Sp17 OS=Mus musculus OX=10090 GN=Spa17 PE=1 SV=1 && PF02197:Regulatory subunit of type II PKA R-subunit
Cg14823	111.656	73.8043	194.828	141.395	162.433	- && - && PF00335:Tetraspanin family
Cg14825	72.6721	53.6009	107.31	41.1028	42.7837	- && sp|P08962|CD63_HUMAN CD63 antigen OS=Homo sapiens OX=9606 GN=CD63 PE=1 SV=2 && PF00335:Tetraspanin family
Cg14829	0.126298	0.176799	0.329315	0	0.573984	- && - && -
Cg14830	211.25	121.309	447.75	132.788	122.36	- && sp|Q13887|KLF5_HUMAN Krueppel-like factor 5 OS=Homo sapiens OX=9606 GN=KLF5 PE=1 SV=2 && -
Cg14835	2.54518	7.44648	2.73892	19.4826	14.313	- && sp|Q8NEY3|SPAT4_HUMAN Spermatogenesis-associated protein 4 OS=Homo sapiens OX=9606 GN=SPATA4 PE=1 SV=1 && PF06294:CH-like domain in sperm protein
Cg14839	0.122654	0.157707	0	0	0.279355	- && sp|Q8TER0|SNED1_HUMAN Sushi, nidogen and EGF-like domain-containing protein 1 OS=Homo sapiens OX=9606 GN=SNED1 PE=2 SV=2 && PF00094:von Willebrand factor type D domain|PF03782:AMOP domain|PF06119:Nidogen-like
Cg14851	1.37285	1.48029	0.56067	0.0636034	1.41671	- && sp|Q75WE7|VWA5A_RAT von Willebrand factor A domain-containing protein 5A OS=Rattus norvegicus OX=10116 GN=Vwa5a PE=2 SV=1 && PF08487:Vault protein inter-alpha-trypsin domain|PF13768:von Willebrand factor type A domain
Cg14869	16.2228	17.9031	5.72294	10.9138	6.64584	- && - && -
Cg14874	6.11723	14.3973	4.86653	8.5418	16.8905	- && - && PF17664:Family of unknown function (DUF5526)
Cg14904	1.92613	4.74793	2.39067	0.863241	7.04119	- && sp|A2AU72|ARMC3_MOUSE Armadillo repeat-containing protein 3 OS=Mus musculus OX=10090 GN=Armc3 PE=1 SV=1 && PF00514:Armadillo/beta-catenin-like repeat|PF14381:Ethylene-responsive protein kinase Le-CTR1|PF13646:HEAT repeats
Cg14907	6.81931	12.3015	23.2232	7.21562	1.83824	- && - && -
Cg14909	2.4639	0.630012	3.06763	2.59703	1.68122	- && sp|Q923P0|COKA1_MOUSE Collagen alpha-1(XX) chain OS=Mus musculus OX=10090 GN=Col20a1 PE=2 SV=3 && PF00092:von Willebrand factor type A domain
Cg14929	0.173295	0.172095	0.0346328	0.530233	0	- && sp|Q8CDF7|EXD1_MOUSE piRNA biogenesis protein EXD1 OS=Mus musculus OX=10090 GN=Exd1 PE=1 SV=1 && PF01612:3'-5' exonuclease
Cg14941	0.608223	1.3335	0.499214	4.55289	0.451515	- && - && PF04488:Glycosyltransferase sugar-binding region containing DXD motif
Cg14945	0.793706	3.57981	0.683851	1.65376	1.03176	- && - && PF02931:Neurotransmitter-gated ion-channel ligand binding domain
Cg14958	12.2575	3.77719	7.90975	6.81646	6.31541	- && sp|Q8BUV8|GP107_MOUSE Protein GPR107 OS=Mus musculus OX=10090 GN=Gpr107 PE=1 SV=2 && PF06814:Lung seven transmembrane receptor
Cg14964	21.1365	3.88522	12.083	19.1704	21.5918	- && sp|Q96RU3|FNBP1_HUMAN Formin-binding protein 1 OS=Homo sapiens OX=9606 GN=FNBP1 PE=1 SV=2 && PF00611:Fes/CIP4, and EFC/F-BAR homology domain
Cg14973	14.0503	5.86915	15.0847	14.3533	9.04656	- && sp|Q5ZJY3|GARL3_CHICK GTPase-activating Rap/Ran-GAP domain-like protein 3 OS=Gallus gallus OX=9031 GN=GARNL3 PE=2 SV=1 && PF02145:Rap/ran-GAP|PF00780:CNH domain
Cg14991	0.591225	1.4672	0.44599	0.316992	0.44369	- && - && PF07679:Immunoglobulin I-set domain|PF13895:Immunoglobulin domain|PF13927:Immunoglobulin domain|PF08205:CD80-like C2-set immunoglobulin domain
Cg14998	0	0	0.589009	1.01104	1.38536	- && - && -
Cg15001	135.197	94.5963	203.28	146.177	179.37	- && - && PF01030:Receptor L domain|PF00757:Furin-like cysteine rich region
Cg15005	2.86425	3.71217	1.77758	3.79739	4.22691	- && - && -
Cg15024	7.36489	11.4262	26.6648	11.435	10.9399	- && sp|P20351|T23O_DROME Tryptophan 2,3-dioxygenase OS=Drosophila melanogaster OX=7227 GN=v PE=1 SV=1 && PF03301:Tryptophan 2,3-dioxygenase
Cg15046	0.830649	2.40416	0.725153	1.84374	1.26939	- && sp|Q7T070|RHBG_DANRE Ammonium transporter Rh type B OS=Danio rerio OX=7955 GN=rhbg PE=2 SV=1 && PF00909:Ammonium Transporter Family
Cg15057	2.16902	4.72927	1.63491	0.37768	1.88784	- && sp|Q8BGN2|CD033_MOUSE UPF0462 protein C4orf33 homolog OS=Mus musculus OX=10090 GN=D3Ertd751e PE=2 SV=1 && -
Cg15061	0	0.689787	0.179689	0.756259	0	- && sp|Q8JFN7|ACH91_ONCMY Neuronal acetylcholine receptor subunit alpha-9-I OS=Oncorhynchus mykiss OX=8022 GN=nachra9 PE=2 SV=1 && PF02931:Neurotransmitter-gated ion-channel ligand binding domain|PF02932:Neurotransmitter-gated ion-channel transmembrane region
Cg15071	0.392015	2.90487	0	0.149093	0.132411	- && - && PF04488:Glycosyltransferase sugar-binding region containing DXD motif
Cg15076	0	0	0.1376	0.240265	0.497436	- && sp|O14522|PTPRT_HUMAN Receptor-type tyrosine-protein phosphatase T OS=Homo sapiens OX=9606 GN=PTPRT PE=1 SV=6 && PF00102:Protein-tyrosine phosphatase
Cg15086	0.495588	0.327423	1.6136	0.972092	0.596469	- && sp|Q9UHI7|S23A1_HUMAN Solute carrier family 23 member 1 OS=Homo sapiens OX=9606 GN=SLC23A1 PE=1 SV=3 && PF00860:Permease family
Cg15099	0.954696	1.53749	0.439963	0.507858	0.468784	- && - && PF15057:Domain of unknown function (DUF4537)
Cg15119	2.02943	0.283993	1.56165	1.6134	2.25072	- && - && PF16026:Mitochondria-eating protein
Cg15132	27.778	34.0718	49.6985	44.0629	94.8826	- && sp|P36956|SRBP1_HUMAN Sterol regulatory element-binding protein 1 OS=Homo sapiens OX=9606 GN=SREBF1 PE=1 SV=2 && PF00010:Helix-loop-helix DNA-binding domain
Cg15176	0.310862	0	3.77593	0.216683	0.546092	- && - && -
Cg15177	1.04788	2.52113	0.303887	0.933713	6.2187	- && - && -
Cg15178	0.245074	0.111794	2.31908	0.269555	0.282702	- && - && -
Cg15180	24.4234	7.7261	24.953	16.1647	43.8638	- && - && -
Cg15183	19.5495	7.75392	28.6924	11.6414	10.599	- && sp|Q7JK24|B3GT1_GORGO Beta-1,3-galactosyltransferase 1 OS=Gorilla gorilla gorilla OX=9595 GN=B3GALT1 PE=3 SV=1 && PF01762:Galactosyltransferase
Cg15184	1.38376	0.699628	3.05576	0.425129	0.143704	- && - && PF00041:Fibronectin type III domain
Cg15185	7.3292	9.11943	2.69288	7.41376	5.19744	- && - && PF13855:Leucine rich repeat
Cg15198	0.13568	0.955072	0.18356	1.09971	1.45463	- && sp|P62290|ASPM_HYLLA Abnormal spindle-like microcephaly-associated protein homolog OS=Hylobates lar OX=9580 GN=ASPM PE=3 SV=1 && PF00307:Calponin homology (CH) domain|PF15780:Abnormal spindle-like microcephaly-assoc'd, ASPM-SPD-2-Hydin
Cg15208	0	1.88728	0.14716	0.0525665	0.319998	- && - && PF00335:Tetraspanin family
Cg15217	4.38502	1.81711	3.99217	2.34666	3.22151	- && sp|Q8N531|FBXL6_HUMAN F-box/LRR-repeat protein 6 OS=Homo sapiens OX=9606 GN=FBXL6 PE=2 SV=1 && PF12937:F-box-like
Cg15218	19.7412	34.9685	17.0197	21.7539	30.4565	- && sp|Q6NWX7|NTM1A_DANRE N-terminal Xaa-Pro-Lys N-methyltransferase 1 OS=Danio rerio OX=7955 GN=ntmt1 PE=2 SV=1 && PF05891:AdoMet dependent proline di-methyltransferase
Cg15222	71.3871	21.4649	60.0473	25.2608	21.0999	- && sp|E7F021|ZD12B_DANRE Palmitoyltransferase ZDHHC12-B OS=Danio rerio OX=7955 GN=zdhhc12b PE=3 SV=1 && PF01529:DHHC palmitoyltransferase
Cg15243	5.54876	1.51065	3.06367	5.35238	3.42244	- && sp|A2RUS2|DEND3_HUMAN DENN domain-containing protein 3 OS=Homo sapiens OX=9606 GN=DENND3 PE=1 SV=2 && PF03456:uDENN domain|PF02141:DENN (AEX-3) domain|PF03455:dDENN domain
Cg15290	0.0907151	0.278811	0.141993	0.165291	2.15979	- && sp|Q8JFN7|ACH91_ONCMY Neuronal acetylcholine receptor subunit alpha-9-I OS=Oncorhynchus mykiss OX=8022 GN=nachra9 PE=2 SV=1 && PF02932:Neurotransmitter-gated ion-channel transmembrane region|PF02931:Neurotransmitter-gated ion-channel ligand binding domain
Cg15318	3.8899	2.11298	6.38825	3.95451	3.85216	- && sp|P34257|TC3A_CAEEL Transposable element Tc3 transposase OS=Caenorhabditis elegans OX=6239 GN=tc3a PE=1 SV=1 && PF01498:Transposase|PF13358:DDE superfamily endonuclease|PF12697:Alpha/beta hydrolase family
Cg15323	1.83036	3.54483	1.28581	2.31655	1.94875	- && - && PF12796:Ankyrin repeats (3 copies)
Cg15329	0	0.153883	0	1.01214	0	- && - && PF00046:Homeodomain
Cg15334	0.180571	0.0509832	0.756508	0.361602	0.281046	- && - && PF00001:7 transmembrane receptor (rhodopsin family)
Cg15338	2.85725	8.95758	0	4.27114	1.03094	- && - && PF16026:Mitochondria-eating protein
Cg15339	2.14049	5.28384	0.124965	4.7038	1.49632	- && - && PF16026:Mitochondria-eating protein
Cg15353	39.3457	29.678	12.8156	10.6991	23.6969	- && - && PF09458:H-type lectin domain
Cg15383	4.50545	3.28709	1.65098	3.06289	0.242854	- && sp|Q704V6|TLR6_BOVIN Toll-like receptor 6 OS=Bos taurus OX=9913 GN=TLR6 PE=2 SV=1 && PF01582:TIR domain
Cg15386	0.0457007	0.0201959	0.0256583	0.973347	0.260393	- && sp|Q6R5N8|TLR13_MOUSE Toll-like receptor 13 OS=Mus musculus OX=10090 GN=Tlr13 PE=1 SV=1 && PF13855:Leucine rich repeat|PF01582:TIR domain
Cg15393	2.11351	6.15518	2.62513	2.74658	3.35989	- && sp|Q7RTX9|MOT14_HUMAN Monocarboxylate transporter 14 OS=Homo sapiens OX=9606 GN=SLC16A14 PE=2 SV=1 && PF07690:Major Facilitator Superfamily
Cg15396	0.087433	0.0955762	0.0721081	0.087135	1.24886	- && sp|A0A1L8EYB2|DAAF8_XENLA Dynein axonemal assembly factor 8 OS=Xenopus laevis OX=8355 GN=dnaaf8 PE=1 SV=1 && PF00334:Nucleoside diphosphate kinase
Cg15433	1.20445	0.728947	0.818043	1.06575	0.108393	- && - && PF17771:ADAM cysteine-rich domain|PF01421:Reprolysin (M12B) family zinc metalloprotease
Cg15435	0.037013	0.0658232	0.0214495	0.216815	0	- && - && PF17771:ADAM cysteine-rich domain|PF13688:Metallo-peptidase family M12
Cg15438	0.369067	0.203275	0	5.67461	0.0849977	- && - && -
Cg15444	7.03667	10.5377	25.9995	6.1931	8.92653	- && - && PF07525:SOCS box|PF12796:Ankyrin repeats (3 copies)
Cg15464	2.03595	0.421091	1.55445	1.42086	1.40283	- && - && PF12796:Ankyrin repeats (3 copies)
Cg15503	0.961092	2.09026	0.50727	1.51389	1.00029	- && sp|Q9BYN0|SRXN1_HUMAN Sulfiredoxin-1 OS=Homo sapiens OX=9606 GN=SRXN1 PE=1 SV=2 && PF01847:VHL beta domain
Cg15516	2.33324	0.833266	2.33469	2.46274	2.86589	- && - && PF13365:Trypsin-like peptidase domain
Cg15518	0.917122	1.82122	1.65665	3.15043	1.08646	- && sp|O02768|PGH2_RABIT Prostaglandin G/H synthase 2 OS=Oryctolagus cuniculus OX=9986 GN=PTGS2 PE=2 SV=1 && PF03098:Animal haem peroxidase
Cg15519	8.36311	2.2458	9.14054	8.62499	4.61943	- && sp|P47712|PA24A_HUMAN Cytosolic phospholipase A2 OS=Homo sapiens OX=9606 GN=PLA2G4A PE=1 SV=2 && PF01735:Lysophospholipase catalytic domain|PF00168:C2 domain
Cg15520	9.68492	0.976255	2.4326	5.25135	3.47209	- && sp|Q5T4S7|UBR4_HUMAN E3 ubiquitin-protein ligase UBR4 OS=Homo sapiens OX=9606 GN=UBR4 PE=1 SV=1 && PF13764:E3 ubiquitin-protein ligase UBR4|PF02207:Putative zinc finger in N-recognin (UBR box)
Cg15525	0	1.04988	0	0.124129	0	- && - && -
Cg15538	16.3987	10.7604	25.3296	21.5992	16.9874	- && sp|D8X2C5|FAD2_SIGCA Acyl-CoA Delta-4 desaturase OS=Siganus canaliculatus OX=75042 GN=fad2 PE=1 SV=1 && PF00487:Fatty acid desaturase
Cg15559	0.679549	0.850057	1.3951	1.60229	4.69071	- && sp|Q9HAR2|AGRL3_HUMAN Adhesion G protein-coupled receptor L3 OS=Homo sapiens OX=9606 GN=ADGRL3 PE=1 SV=2 && PF01825:GPCR proteolysis site, GPS, motif|PF00002:7 transmembrane receptor (Secretin family)
Cg15565	0.0172527	0.579442	0.122043	0.0337102	1.32336	- && - && -
Cg15574	12.358	9.1439	22.1532	8.42054	9.74785	- && sp|P49797|RGS3_RAT Regulator of G-protein signaling 3 OS=Rattus norvegicus OX=10116 GN=Rgs3 PE=1 SV=2 && PF00615:Regulator of G protein signaling domain
Cg15575	4.25097	5.76775	21.5298	5.29752	8.18758	- && sp|A0A1D3PCM3|SST_EMEND Serine O-succinyltransferase OS=Emericella nidulans OX=162425 GN=CysA PE=1 SV=1 && PF00561:alpha/beta hydrolase fold
Cg15576	0.963176	1.74331	0.808114	1.03489	1.20338	- && sp|E9Q309|CE350_MOUSE Centrosome-associated protein 350 OS=Mus musculus OX=10090 GN=Cep350 PE=1 SV=1 && PF14309:Domain of unknown function (DUF4378)|PF01302:CAP-Gly domain
Cg15596	8.32241	8.67384	3.06347	1.05901	0.710264	- && - && -
Cg15643	1.05484	0.806847	2.36463	2.18036	2.48777	- && - && PF07679:Immunoglobulin I-set domain
Cg15644	0.730702	0.0929738	0.410499	0.571406	0.801803	- && sp|A2AX52|CO6A4_MOUSE Collagen alpha-4(VI) chain OS=Mus musculus OX=10090 GN=Col6a4 PE=1 SV=2 && PF00092:von Willebrand factor type A domain
Cg15668	0.6614	1.25237	0.370666	0.975673	0.932126	- && sp|Q99315|YG31B_YEAST Transposon Ty3-G Gag-Pol polyprotein OS=Saccharomyces cerevisiae (strain ATCC 204508 / S288c) OX=559292 GN=TY3B-G PE=1 SV=3 && PF17919:RNase H-like domain found in reverse transcriptase|PF17921:Integrase zinc binding domain|PF00078:Reverse transcriptase (RNA-dependent DNA polymerase)
Cg15677	0.918668	2.67412	1.17397	0.108273	1.22058	- && sp|Q8K1T0|TMPS3_MOUSE Transmembrane protease serine 3 OS=Mus musculus OX=10090 GN=Tmprss3 PE=1 SV=2 && PF00089:Trypsin
Cg15693	0.0999705	0.232861	1.13044	0.0499472	0.237854	- && sp|Q5VXM1|CDCP2_HUMAN CUB domain-containing protein 2 OS=Homo sapiens OX=9606 GN=CDCP2 PE=2 SV=1 && PF00431:CUB domain|PF00024:PAN domain
Cg15694	0	0	0.13956	0.0938644	4.41414	- && - && -
Cg15703	5.03218	8.99442	3.42522	4.19435	4.82563	- && sp|Q7ZYF1|DJ27A_XENLA DnaJ homolog subfamily C member 27-A OS=Xenopus laevis OX=8355 GN=dnajc27-a PE=1 SV=1 && PF00071:Ras family
Cg15721	2.28523	2.83364	3.01145	0.809659	3.45017	- && - && PF01187:Macrophage migration inhibitory factor (MIF)
Cg15728	25.4529	21.4113	20.9392	45.1624	116.393	- && - && PF00386:C1q domain
Cg15730	41.1608	5.26452	47.6041	47.778	43.1225	- && - && PF00386:C1q domain
Cg15740	0.0887495	2.26134	0.380315	0.503448	0.673757	- && - && PF01823:MAC/Perforin domain|PF16977:C-terminal domain of apextrin
Cg15751	13.4499	5.03111	12.268	12.2038	9.57811	- && - && PF12796:Ankyrin repeats (3 copies)
Cg15757	0.0662099	0.275335	0	0	0	- && - && -
Cg15781	43.4122	65.177	28.4108	18.2629	33.5735	- && - && PF07883:Cupin domain
Cg15785	6.87928	3.36117	6.63289	7.34288	6.12225	- && sp|Q5F415|TBC23_CHICK TBC1 domain family member 23 OS=Gallus gallus OX=9031 GN=TBC1D23 PE=2 SV=1 && PF00566:Rab-GTPase-TBC domain|PF00581:Rhodanese-like domain
Cg15786	8.44093	0.246225	2.90501	9.97397	6.29619	- && sp|Q13191|CBLB_HUMAN E3 ubiquitin-protein ligase CBL-B OS=Homo sapiens OX=9606 GN=CBLB PE=1 SV=2 && PF02262:CBL proto-oncogene N-terminal domain 1
Cg15790	6.86009	12.5392	3.64648	5.53188	2.48785	- && - && -
Cg15797	0	0	0.113475	1.15024	0	- && - && -
Cg15806	0.040908	0.0632728	0.0744766	0.00666089	0.179621	- && - && PF16026:Mitochondria-eating protein
Cg15812	3.75282	4.55778	2.11749	2.73601	4.85117	- && - && PF01545:Cation efflux family
Cg15834	0.0838657	0.309099	0.01132	0.0913624	0.0317402	- && sp|Q15822|ACHA2_HUMAN Neuronal acetylcholine receptor subunit alpha-2 OS=Homo sapiens OX=9606 GN=CHRNA2 PE=1 SV=2 && PF02932:Neurotransmitter-gated ion-channel transmembrane region|PF02931:Neurotransmitter-gated ion-channel ligand binding domain
Cg15845	55.2983	26.9025	76.2555	41.8178	31.2066	- && - && PF00001:7 transmembrane receptor (rhodopsin family)
Cg15852	2.34988	1.01175	3.47221	4.62913	4.56799	- && sp|Q4LDD4|ARAP1_MOUSE Arf-GAP with Rho-GAP domain, ANK repeat and PH domain-containing protein 1 OS=Mus musculus OX=10090 GN=Arap1 PE=1 SV=2 && PF00620:RhoGAP domain|PF00788:Ras association (RalGDS/AF-6) domain
Cg15857	25.0673	20.8508	51.9497	8.8625	9.70352	- && - && PF00531:Death domain
Cg15858	14.4212	6.7804	17.8279	8.24427	3.45232	- && - && PF00531:Death domain
Cg15859	1.05862	1.48593	0.396153	0.640558	0.324756	- && sp|Q91XY4|PCDG4_MOUSE Protocadherin gamma-A4 OS=Mus musculus OX=10090 GN=Pcdhga4 PE=1 SV=1 && PF00028:Cadherin domain|PF08266:Cadherin-like
Cg15882	1.68726	2.705	0.296102	8.46904	8.16515	- && sp|Q2TBR7|CENPS_BOVIN Centromere protein S OS=Bos taurus OX=9913 GN=CENPS PE=2 SV=1 && PF15630:CENP-S protein
Cg15883	0.375313	0.271478	1.61176	1.5773	1.72314	- && sp|Q9H8Y8|GORS2_HUMAN Golgi reassembly-stacking protein 2 OS=Homo sapiens OX=9606 GN=GORASP2 PE=1 SV=3 && PF04495:GRASP55/65 PDZ-like domain
Cg15885	0.638823	0.502395	0.0445802	0.128733	0.129595	- && sp|P09480|ACHA2_CHICK Neuronal acetylcholine receptor subunit alpha-2 OS=Gallus gallus OX=9031 GN=CHRNA2 PE=2 SV=1 && PF02932:Neurotransmitter-gated ion-channel transmembrane region|PF02931:Neurotransmitter-gated ion-channel ligand binding domain
Cg15889	0	0.640764	0.161057	0.0288735	2.46268	- && - && -
Cg15898	1.37453	0.338533	1.63552	1.22389	1.54925	- && sp|Q4LDD4|ARAP1_MOUSE Arf-GAP with Rho-GAP domain, ANK repeat and PH domain-containing protein 1 OS=Mus musculus OX=10090 GN=Arap1 PE=1 SV=2 && PF00169:PH domain|PF07647:SAM domain (Sterile alpha motif)|PF01412:Putative GTPase activating protein for Arf|PF00620:RhoGAP domain
Cg15903	10.0551	4.36574	70.8519	15.4026	14.6002	- && - && PF00531:Death domain
Cg15904	13.948	5.69627	15.1086	5.10865	3.89947	- && - && PF00531:Death domain
Cg15920	0.492494	0.580137	1.15085	1.24883	0.195247	- && sp|Q9HC56|PCDH9_HUMAN Protocadherin-9 OS=Homo sapiens OX=9606 GN=PCDH9 PE=1 SV=2 && PF08266:Cadherin-like|PF00028:Cadherin domain
Cg15931	0.420052	0.472704	0.373836	0.0189621	0.349076	- && - && PF16026:Mitochondria-eating protein
Cg15946	4.32053	1.46223	3.60433	2.92195	3.12985	- && - && -
Cg15990	3.53984	6.33212	2.4839	1.43305	1.37937	- && - && PF16026:Mitochondria-eating protein
Cg16009	10.2066	12.364	4.69989	8.05745	6.75699	- && sp|A9UWF0|SURF1_MONBE SURF1-like protein OS=Monosiga brevicollis OX=81824 GN=18583 PE=3 SV=1 && PF02104:SURF1 family
Cg16011	0.0807691	0.409832	0.0246989	0.0301036	0.0406449	- && - && PF13445:RING-type zinc-finger
Cg16016	2.39537	2.2578	0.508168	0.813422	0.688042	- && sp|Q09225|NRF6_CAEEL Nose resistant to fluoxetine protein 6 OS=Caenorhabditis elegans OX=6239 GN=nrf-6 PE=1 SV=3 && PF01757:Acyltransferase family
Cg16026	8.82009	8.73873	2.73986	1.00822	1.62081	- && - && PF17517:IgGFc binding protein
Cg16031	0.463816	0.844386	0.0658988	0.313354	0.169594	- && sp|Q61603|GLRA4_MOUSE Glycine receptor subunit alpha-4 OS=Mus musculus OX=10090 GN=Glra4 PE=1 SV=3 && PF02932:Neurotransmitter-gated ion-channel transmembrane region|PF02931:Neurotransmitter-gated ion-channel ligand binding domain
Cg16064	1.3929	0.384518	1.13321	1.3873	1.35166	- && sp|Q9GV77|FREM2_LYTVA Extracellular matrix protein 3 OS=Lytechinus variegatus OX=7654 GN=ECM3 PE=1 SV=1 && PF03160:Calx-beta domain|PF16184:Cadherin-like
Cg16065	0.147708	0.237273	0.419686	0.786374	0.0548171	- && sp|O43301|HS12A_HUMAN Heat shock 70 kDa protein 12A OS=Homo sapiens OX=9606 GN=HSPA12A PE=1 SV=2 && PF00012:Hsp70 protein
Cg16066	0.966497	0.927957	0.755802	1.01511	0.0113604	- && sp|Q9CZJ2|HS12B_MOUSE Heat shock 70 kDa protein 12B OS=Mus musculus OX=10090 GN=Hspa12b PE=1 SV=1 && PF00012:Hsp70 protein
Cg16068	2.26837	1.91857	1.66458	3.95417	1.08356	- && sp|O43301|HS12A_HUMAN Heat shock 70 kDa protein 12A OS=Homo sapiens OX=9606 GN=HSPA12A PE=1 SV=2 && PF00012:Hsp70 protein
Cg16073	1.6908	2.55514	0.759437	1.16003	1.44083	- && - && PF16026:Mitochondria-eating protein
Cg16084	0.272879	0.47155	0.303105	0.196395	5.02662	- && sp|Q3SWX0|NIPA2_BOVIN Magnesium transporter NIPA2 OS=Bos taurus OX=9913 GN=NIPA2 PE=2 SV=1 && PF05653:Magnesium transporter NIPA
Cg16097	1.04655	15.433	1.14499	14.9272	9.28833	- && - && -
Cg16104	3.43243	5.11599	11.3044	5.30399	6.9714	- && sp|Q9EQN5|SMBP2_RAT DNA-binding protein SMUBP-2 OS=Rattus norvegicus OX=10116 GN=Ighmbp2 PE=1 SV=1 && PF13087:AAA domain|PF01428:AN1-like Zinc finger|PF01424:R3H domain|PF13086:AAA domain
Cg16110	5.62736	8.93894	3.17064	5.29081	4.18988	- && sp|O95671|ASML_HUMAN Probable bifunctional dTTP/UTP pyrophosphatase/methyltransferase protein OS=Homo sapiens OX=9606 GN=ASMTL PE=1 SV=3 && PF02545:Maf-like protein
Cg16112	1.59218	0.538082	1.65514	1.65566	0.206283	- && - && -
Cg16131	3.13292	2.56302	0.159893	2.07064	1.35821	- && - && -
Cg16134	0.861963	0.359947	1.05603	1.85211	1.07984	- && sp|A2AJN7|S4A11_MOUSE Sodium bicarbonate transporter-like protein 11 OS=Mus musculus OX=10090 GN=Slc4a11 PE=2 SV=1 && PF00955:HCO3- transporter family
Cg16138	5.64265	7.46173	2.26155	3.68182	3.3889	- && sp|Q32PA9|FKBP2_BOVIN Peptidyl-prolyl cis-trans isomerase FKBP2 OS=Bos taurus OX=9913 GN=FKBP2 PE=2 SV=1 && PF00254:FKBP-type peptidyl-prolyl cis-trans isomerase|PF13499:EF-hand domain pair
Cg16153	319.781	155.11	430.503	134.563	122.673	- && sp|P24733|MYS_ARGIR Myosin heavy chain, striated muscle OS=Argopecten irradians OX=31199 PE=1 SV=1 && PF00063:Myosin head (motor domain)|PF02736:Myosin N-terminal SH3-like domain|PF01576:Myosin tail
Cg16154	0.109054	0.942289	0.388337	0.0252506	1.64568	- && sp|Q5XIG2|C1QT1_RAT Complement C1q tumor necrosis factor-related protein 1 OS=Rattus norvegicus OX=10116 GN=C1qtnf1 PE=2 SV=1 && PF00386:C1q domain
Cg16156	0.564389	1.0015	0.756047	0.0203709	0.470735	- && sp|Q9Y345|SC6A5_HUMAN Sodium- and chloride-dependent glycine transporter 2 OS=Homo sapiens OX=9606 GN=SLC6A5 PE=1 SV=3 && PF00209:Sodium:neurotransmitter symporter family
Cg16163	1.15194	0.05944	1.7989	2.04141	0.310646	- && sp|P24733|MYS_ARGIR Myosin heavy chain, striated muscle OS=Argopecten irradians OX=31199 PE=1 SV=1 && PF00063:Myosin head (motor domain)
Cg16164	3.94155	0	3.87294	0.365554	0.0846647	- && sp|P24733|MYS_ARGIR Myosin heavy chain, striated muscle OS=Argopecten irradians OX=31199 PE=1 SV=1 && PF00063:Myosin head (motor domain)
Cg16165	47.3909	3.0959	32.4807	34.8986	12.182	- && sp|P24733|MYS_ARGIR Myosin heavy chain, striated muscle OS=Argopecten irradians OX=31199 PE=1 SV=1 && -
Cg16166	33.8485	3.91512	18.5172	7.29133	7.49305	- && sp|P24733|MYS_ARGIR Myosin heavy chain, striated muscle OS=Argopecten irradians OX=31199 PE=1 SV=1 && PF00063:Myosin head (motor domain)|PF02736:Myosin N-terminal SH3-like domain
Cg16170	0.596252	0.308464	1.13971	0.39402	0.386327	- && sp|Q761V0|SC6A5_MOUSE Sodium- and chloride-dependent glycine transporter 2 OS=Mus musculus OX=10090 GN=Slc6a5 PE=1 SV=1 && PF00209:Sodium:neurotransmitter symporter family
Cg16185	0.217372	0.360154	0.0295405	1.79583	0.335768	- && - && -
Cg16186	8.11603	16.6555	7.62297	15.9321	9.00887	- && - && -
Cg16205	83.2362	104.464	258.828	339.609	526.305	- && - && -
Cg16208	37.7918	42.2873	10.7449	8.7413	15.5017	- && - && -
Cg16209	1.65578	3.99567	1.06932	0.283916	1.14385	- && sp|Q03412|UNC7_CAEEL Innexin unc-7 OS=Caenorhabditis elegans OX=6239 GN=unc-7 PE=1 SV=1 && PF00876:Innexin
Cg16211	1.91989	2.82564	0.980899	1.08554	0.654082	- && sp|Q03412|UNC7_CAEEL Innexin unc-7 OS=Caenorhabditis elegans OX=6239 GN=unc-7 PE=1 SV=1 && PF00876:Innexin
Cg16219	0.028369	0	0.0888101	1.1698	0.0335451	- && - && -
Cg16223	0.103881	0.119989	0.0950965	1.35161	0.0907292	- && sp|Q5D0K2|CCKAR_CANLF Cholecystokinin receptor type A OS=Canis lupus familiaris OX=9615 GN=CCKAR PE=2 SV=1 && PF00001:7 transmembrane receptor (rhodopsin family)
Cg16229	0.0356515	0.707871	0.104647	0.0232199	0.739435	- && - && -
Cg16260	20.1482	29.0221	13.866	16.3719	14.8641	- && - && PF10203:Cytochrome c oxidase assembly protein PET191
Cg16270	1.62	1.22095	0.133397	1.77098	0.495578	- && - && -
Cg16280	1.51001	1.24666	3.13496	0.944643	3.1923	- && sp|Q3UMC0|AFG2H_MOUSE ATPase family protein 2 homolog OS=Mus musculus OX=10090 GN=Spata5 PE=1 SV=2 && PF00004:ATPase family associated with various cellular activities (AAA)|PF17862:AAA+ lid domain
Cg16281	14.4465	12.5258	32.8817	15.4976	15.9007	- && sp|Q6YHK3|CD109_HUMAN CD109 antigen OS=Homo sapiens OX=9606 GN=CD109 PE=1 SV=2 && PF07677:A-macroglobulin receptor binding domain|PF00207:Alpha-2-macroglobulin family|PF17791:Macroglobulin domain MG3|PF07678:A-macroglobulin TED domain|PF07703:Alpha-2-macroglobulin bait region domain|PF01835:MG2 domain
Cg16284	6.8417	41.5706	9.7287	26.3123	45.4829	- && sp|P24861|CCNA_PATVU G2/mitotic-specific cyclin-A OS=Patella vulgata OX=6465 PE=2 SV=1 && PF16500:N-terminal region of cyclin_N|PF00134:Cyclin, N-terminal domain|PF02984:Cyclin, C-terminal domain
Cg16285	9.33224	2.35176	7.05513	6.96528	6.98175	- && sp|P70704|AT8A1_MOUSE Phospholipid-transporting ATPase IA OS=Mus musculus OX=10090 GN=Atp8a1 PE=1 SV=2 && PF13246:Cation transport ATPase (P-type)|PF16209:Phospholipid-translocating ATPase N-terminal|PF16212:Phospholipid-translocating P-type ATPase C-terminal
Cg16294	43.0165	28.6761	62.5927	51.7174	14.1158	- && - && -
Cg16325	2.5668	3.59627	1.44801	2.46516	2.0954	- && - && -
Cg16341	2.96877	2.21004	0.233218	0.0479298	0.371369	- && sp|Q9DCK3|TSN4_MOUSE Tetraspanin-4 OS=Mus musculus OX=10090 GN=Tspan4 PE=1 SV=1 && PF00335:Tetraspanin family
Cg16350	0.263761	2.28202	0.399546	0.639226	1.21582	- && sp|Q05901|ACHB3_HUMAN Neuronal acetylcholine receptor subunit beta-3 OS=Homo sapiens OX=9606 GN=CHRNB3 PE=2 SV=2 && PF02932:Neurotransmitter-gated ion-channel transmembrane region|PF02931:Neurotransmitter-gated ion-channel ligand binding domain
Cg16352	0.351598	0	0.548746	1.69323	0.0697006	- && sp|Q9H4Q4|PRD12_HUMAN PR domain zinc finger protein 12 OS=Homo sapiens OX=9606 GN=PRDM12 PE=1 SV=2 && -
Cg16359	0	0.00612314	0	0	0.147606	- && sp|A2AX52|CO6A4_MOUSE Collagen alpha-4(VI) chain OS=Mus musculus OX=10090 GN=Col6a4 PE=1 SV=2 && PF12248:Farnesoic acid 0-methyl transferase|PF00092:von Willebrand factor type A domain
Cg16361	0.310683	1.57532	5.75572	0.103571	0.0648099	- && - && PF00092:von Willebrand factor type A domain|PF12248:Farnesoic acid 0-methyl transferase
Cg16368	0.0445904	0.332766	0.0727138	0.00968062	0.522628	- && - && -
Cg16371	2.97892	3.26217	1.41673	1.88014	2.2753	- && sp|Q6L8Q7|PDE12_HUMAN 2',5'-phosphodiesterase 12 OS=Homo sapiens OX=9606 GN=PDE12 PE=1 SV=2 && PF03372:Endonuclease/Exonuclease/phosphatase family
Cg16372	1.25683	3.45326	1.06305	3.78147	2.6953	- && sp|O89033|CDC6_MOUSE Cell division control protein 6 homolog OS=Mus musculus OX=10090 GN=Cdc6 PE=1 SV=2 && PF17872:AAA lid domain|PF00004:ATPase family associated with various cellular activities (AAA)|PF09079:CDC6, C terminal winged helix domain
Cg16380	0.58823	5.76978	0.990522	3.30296	1.21489	- && - && PF01145:SPFH domain / Band 7 family
Cg16391	0	0.810332	0	0	0.899163	- && - && PF00520:Ion transport protein
Cg16420	1.78826	4.93471	3.25226	16.8638	70.6942	- && - && -
Cg16424	0.338499	0.0598352	1.48234	0.05687	0.785993	- && - && -
Cg16432	2.36294	3.302	0.997762	1.07466	0.861751	- && - && -
Cg16434	1.84677	0.582168	0	2.24477	0.952556	- && - && -
Cg16451	164.141	61.7119	680.646	508.759	88.4673	- && sp|O54750|CP2J6_MOUSE Cytochrome P450 2J6 OS=Mus musculus OX=10090 GN=Cyp2j6 PE=2 SV=2 && PF00067:Cytochrome P450
Cg16453	2.52296	4.46142	0.49946	2.0018	2.33571	- && sp|P17538|CTRB1_HUMAN Chymotrypsinogen B OS=Homo sapiens OX=9606 GN=CTRB1 PE=2 SV=2 && PF00089:Trypsin
Cg16454	0.671063	2.50828	1.94726	0.205738	3.52363	- && sp|O88854|GALR2_MOUSE Galanin receptor type 2 OS=Mus musculus OX=10090 GN=Galr2 PE=2 SV=2 && PF00001:7 transmembrane receptor (rhodopsin family)
Cg16472	0.130666	0.37312	1.22776	0.141556	0.0945114	- && - && -
Cg16510	11.4036	12.5444	5.64595	6.34813	3.02743	- && sp|Q3T197|STEEP_BOVIN STING ER exit protein OS=Bos taurus OX=9913 GN=STEEP1 PE=2 SV=1 && -
Cg16524	25.6752	34.5384	16.0656	25.4169	28.1539	- && sp|Q5RC69|DCTD_PONAB Deoxycytidylate deaminase OS=Pongo abelii OX=9601 GN=DCTD PE=2 SV=1 && PF00383:Cytidine and deoxycytidylate deaminase zinc-binding region
Cg16527	0.427027	2.95389	0.547116	0.256238	0.525345	- && - && PF00386:C1q domain
Cg16536	3.10321	8.37242	3.63375	7.09969	7.68456	- && sp|Q9Y483|MTF2_HUMAN Metal-response element-binding transcription factor 2 OS=Homo sapiens OX=9606 GN=MTF2 PE=1 SV=3 && PF00628:PHD-finger|PF18104:Jumonji domain-containing protein 2A Tudor domain
Cg16543	1.19084	2.78772	1.1448	5.35156	9.09325	- && sp|Q14DL3|LRIQ3_MOUSE Leucine-rich repeat and IQ domain-containing protein 3 OS=Mus musculus OX=10090 GN=Lrriq3 PE=2 SV=1 && -
Cg16550	1.9941	0.805931	0	0.0856891	0.46737	- && sp|Q6AX44|FBCDA_XENLA Fibrinogen C domain-containing protein 1-A OS=Xenopus laevis OX=8355 GN=fibcd1-a PE=2 SV=1 && PF00147:Fibrinogen beta and gamma chains, C-terminal globular domain
Cg16558	1.9369	5.59906	1.53611	3.92202	2.74049	- && - && -
Cg16566	0	0.254572	5.9689	0	0.0521382	- && - && -
Cg16573	10.7615	9.88544	29.1899	9.00166	4.90082	- && sp|Q27J81|INF2_HUMAN Inverted formin-2 OS=Homo sapiens OX=9606 GN=INF2 PE=1 SV=2 && PF02181:Formin Homology 2 Domain|PF06371:Diaphanous GTPase-binding Domain|PF06367:Diaphanous FH3 Domain
Cg16579	1.71159	1.49992	1.94173	2.56235	11.4362	- && sp|Q8AV28|PCM1_CHICK Pericentriolar material 1 protein OS=Gallus gallus OX=9031 GN=PCM1 PE=2 SV=1 && PF15717:Pericentriolar material 1 C terminus
Cg16585	39.419	5.21851	21.8782	16.825	16.7627	- && - && PF13895:Immunoglobulin domain
Cg16601	0	0.397817	0	0	2.2102	- && - && -
Cg16619	39.4499	44.2617	97.1637	16.8073	22.6233	- && - && -
Cg16621	268.546	227.565	487.01	181.219	227.79	- && - && -
Cg16626	2.87855	7.79585	3.33842	4.68293	1.71011	- && sp|A0A1B0GTI8|TM272_HUMAN Transmembrane protein 272 OS=Homo sapiens OX=9606 GN=TMEM272 PE=2 SV=3 && -
Cg16643	0.0434562	0.434372	0	0.0734924	0	- && sp|P98158|LRP2_RAT Low-density lipoprotein receptor-related protein 2 OS=Rattus norvegicus OX=10116 GN=Lrp2 PE=1 SV=1 && PF14670:Coagulation Factor Xa inhibitory site|PF00058:Low-density lipoprotein receptor repeat class B
Cg16644	1.95554	0.969523	7.24982	0.946008	7.22223	- && sp|Q8LPL3|ASO_ARATH L-ascorbate oxidase OS=Arabidopsis thaliana OX=3702 GN=AAO PE=1 SV=1 && PF07731:Multicopper oxidase|PF00394:Multicopper oxidase|PF07732:Multicopper oxidase
Cg16658	4.44427	14.3993	6.27487	10.294	13.3192	- && - && PF12796:Ankyrin repeats (3 copies)
Cg16675	0.260153	0.566699	0.0782146	1.35401	0.265654	- && sp|P44718|Y454_HAEIN Uncharacterized metal-dependent hydrolase HI_0454 OS=Haemophilus influenzae (strain ATCC 51907 / DSM 11121 / KW20 / Rd) OX=71421 GN=HI_0454 PE=3 SV=1 && PF01026:TatD related DNase
Cg16684	1.27762	2.02453	7.41931	1.55478	1.44884	- && - && PF07974:EGF-like domain
Cg16689	76.0603	34.2706	68.6732	51.8562	61.2608	- && sp|P23727|P85A_BOVIN Phosphatidylinositol 3-kinase regulatory subunit alpha OS=Bos taurus OX=9913 GN=PIK3R1 PE=1 SV=1 && PF00620:RhoGAP domain|PF00536:SAM domain (Sterile alpha motif)|PF16454:Phosphatidylinositol 3-kinase regulatory subunit P85 inter-SH2 domain|PF00130:Phorbol esters/diacylglycerol binding domain (C1 domain)|PF00017:SH2 domain
Cg16710	2.39849	5.60316	4.17934	2.84262	10.3162	- && sp|Q8IWG1|DNAI3_HUMAN Dynein axonemal intermediate chain 3 OS=Homo sapiens OX=9606 GN=DNAI3 PE=1 SV=1 && -
Cg16715	0.292682	1.80452	0	0.23661	0.553053	- && - && PF13359:DDE superfamily endonuclease
Cg16722	0.997245	1.06416	2.18648	0.508587	2.79922	- && - && -
Cg16732	5.65674	0.218483	1.8386	0.955696	0.990792	- && - && -
Cg16733	0.316425	0.164334	0.934084	1.85483	0.105013	- && sp|Q5RDC7|RWDD3_PONAB RWD domain-containing protein 3 OS=Pongo abelii OX=9601 GN=RWDD3 PE=2 SV=1 && -
Cg16736	0	0.0201401	0.0851869	0.0868771	1.36831	- && sp|Q5VXU9|SHOC1_HUMAN Protein shortage in chiasmata 1 ortholog OS=Homo sapiens OX=9606 GN=SHOC1 PE=1 SV=1 && PF08719:NADAR domain|PF17825:Family of unknown function (DUF5587)
Cg16741	0	1.41316	0.205095	0.0477646	0.059714	- && sp|Q9GRC0|MOS_PATPE Serine/threonine-protein kinase mos OS=Patiria pectinifera OX=7594 GN=mos PE=1 SV=1 && PF00069:Protein kinase domain
Cg16753	0	0.867694	0	0.0328495	0	- && - && -
Cg16785	23.5171	26.8367	106.002	23.4456	12.8268	- && sp|O57321|EAA1_AMBTI Excitatory amino acid transporter 1 OS=Ambystoma tigrinum OX=8305 GN=SLC1A3 PE=1 SV=1 && PF00375:Sodium:dicarboxylate symporter family
Cg16803	13.1136	5.52704	11.0849	13.5518	11.8656	- && sp|P54802|ANAG_HUMAN Alpha-N-acetylglucosaminidase OS=Homo sapiens OX=9606 GN=NAGLU PE=1 SV=2 && PF12971:Alpha-N-acetylglucosaminidase (NAGLU) N-terminal domain|PF05089:Alpha-N-acetylglucosaminidase (NAGLU) tim-barrel domain|PF12972:Alpha-N-acetylglucosaminidase (NAGLU) C-terminal domain
Cg16819	0.130163	1.10578	0.1233	0.124431	0.167124	- && - && -
Cg16835	0.384774	0.672209	0.345499	2.95901	31.3285	- && sp|Q9I9B9|CTL1_TORMA Choline transporter-like protein 1 OS=Torpedo marmorata OX=7788 GN=slc44a1 PE=1 SV=1 && PF04515:Plasma-membrane choline transporter
Cg16873	42.5135	18.4044	37.7768	34.8265	36.5137	- && sp|P09324|YES_CHICK Tyrosine-protein kinase Yes OS=Gallus gallus OX=9031 GN=YES1 PE=1 SV=3 && PF00018:SH3 domain|PF00017:SH2 domain|PF07714:Protein tyrosine and serine/threonine kinase
Cg16877	12.5051	4.36842	11.4251	13.1292	11.7782	- && sp|Q8TDD5|MCLN3_HUMAN Mucolipin-3 OS=Homo sapiens OX=9606 GN=MCOLN3 PE=1 SV=1 && PF08016:Polycystin cation channel
Cg16889	24.9333	10.3361	22.74	16.8809	13.7009	- && - && PF00335:Tetraspanin family
Cg16890	31.7389	29.5133	21.2779	71.4441	21.1849	- && sp|Q8R2M2|TDIF2_MOUSE Deoxynucleotidyltransferase terminal-interacting protein 2 OS=Mus musculus OX=10090 GN=Dnttip2 PE=1 SV=1 && PF08698:Fcf2 pre-rRNA processing
Cg16898	0.970292	2.38775	2.41178	0.948536	3.93644	- && sp|Q8N5R6|CCD33_HUMAN Coiled-coil domain-containing protein 33 OS=Homo sapiens OX=9606 GN=CCDC33 PE=1 SV=3 && -
Cg16901	5.59818	11.468	9.65133	4.35093	10.7122	- && sp|Q09621|LACT2_CAEEL Beta-lactamase domain-containing protein 2 OS=Caenorhabditis elegans OX=6239 GN=lact-2 PE=4 SV=1 && PF00144:Beta-lactamase
Cg16945	124.67	46.1318	553.128	116.851	224.55	- && sp|P0C0W8|GP139_RAT Probable G-protein coupled receptor 139 OS=Rattus norvegicus OX=10116 GN=Gpr139 PE=2 SV=1 && PF00001:7 transmembrane receptor (rhodopsin family)
Cg16962	1.69185	0.0932656	0.0587478	0	0.550838	- && - && -
Cg16965	37.3742	112.074	26.3714	16.3634	20.7207	- && - && PF00538:linker histone H1 and H5 family
Cg16971	46.6223	27.3005	59.341	42.1006	43.4009	- && sp|Q5E9A5|GA45B_BOVIN Growth arrest and DNA damage-inducible protein GADD45 beta OS=Bos taurus OX=9913 GN=GADD45B PE=2 SV=1 && -
Cg16983	0	1.43536	0	0	0.781813	- && - && PF00059:Lectin C-type domain
Cg16990	71.0616	33.5775	79.5012	58.8138	50.4719	- && sp|Q6ZUJ8|BCAP_HUMAN Phosphoinositide 3-kinase adapter protein 1 OS=Homo sapiens OX=9606 GN=PIK3AP1 PE=1 SV=2 && PF14545:Dof, BCAP, and BANK (DBB) motif,
Cg17000	2.28509	1.55915	3.46763	2.2385	1.06458	- && sp|O14522|PTPRT_HUMAN Receptor-type tyrosine-protein phosphatase T OS=Homo sapiens OX=9606 GN=PTPRT PE=1 SV=6 && PF00102:Protein-tyrosine phosphatase
Cg17011	3.91624	1.43226	3.16878	2.49911	2.40257	- && sp|Q8N122|RPTOR_HUMAN Regulatory-associated protein of mTOR OS=Homo sapiens OX=9606 GN=RPTOR PE=1 SV=1 && PF14538:Raptor N-terminal CASPase like domain
Cg17019	242.429	150.59	377.12	188.409	184.835	- && sp|Q92038|ACOD_CYPCA Acyl-CoA desaturase OS=Cyprinus carpio OX=7962 PE=2 SV=2 && PF00487:Fatty acid desaturase
Cg17021	5.52383	9.59087	3.29856	7.3946	8.6557	- && sp|Q13257|MD2L1_HUMAN Mitotic spindle assembly checkpoint protein MAD2A OS=Homo sapiens OX=9606 GN=MAD2L1 PE=1 SV=1 && PF02301:HORMA domain
Cg17027	1.30681	2.00099	0.514114	0.799785	1.05642	- && sp|O05218|YWRD_BACSU Glutathione hydrolase-like YwrD proenzyme OS=Bacillus subtilis (strain 168) OX=224308 GN=ywrD PE=1 SV=1 && PF01019:Gamma-glutamyltranspeptidase
Cg17036	17.4534	13.0591	25.5526	14.9356	8.02929	- && sp|Q1W374|PMM_WHEAT Phosphomannomutase OS=Triticum aestivum OX=4565 GN=PMM PE=1 SV=1 && PF03332:Eukaryotic phosphomannomutase
Cg17045	2.11343	9.31516	1.52001	0.049436	2.64465	- && - && PF05225:helix-turn-helix, Psq domain
Cg17048	0.277541	0.175996	0.129071	0.734559	0.018095	- && sp|P09241|OPSD_ENTDO Rhodopsin OS=Enteroctopus dofleini OX=267067 GN=RHO PE=2 SV=1 && PF00001:7 transmembrane receptor (rhodopsin family)
Cg17049	3.98933	4.9056	34.8481	2.44543	1.36454	- && - && -
Cg17081	1.74944	0.607201	2.44499	1.4867	1.57296	- && sp|O35600|ABCA4_MOUSE Retinal-specific phospholipid-transporting ATPase ABCA4 OS=Mus musculus OX=10090 GN=Abca4 PE=2 SV=1 && PF00005:ABC transporter|PF12698:ABC-2 family transporter protein
Cg17085	2.90911	0.383901	0.578197	0.157938	1.52669	- && - && -
Cg17086	2.84837	7.98131	3.31654	19.6111	4.06743	- && sp|Q00372|SNF1_CANGA Carbon catabolite-derepressing protein kinase OS=Candida glabrata (strain ATCC 2001 / CBS 138 / JCM 3761 / NBRC 0622 / NRRL Y-65) OX=284593 GN=SNF1 PE=3 SV=2 && PF00069:Protein kinase domain
Cg17107	9.8595	4.79917	9.45791	10.981	7.07162	- && sp|Q9U6M0|ECSIT_DROME Evolutionarily conserved signaling intermediate in Toll pathway, mitochondrial OS=Drosophila melanogaster OX=7227 GN=ECSIT PE=1 SV=2 && PF14784:C-terminal domain of the ECSIT protein|PF06239:Evolutionarily conserved signalling intermediate in Toll pathway
Cg17121	19.5773	31.669	12.2371	21.0511	32.674	- && sp|Q9DCM4|DNAL4_MOUSE Dynein axonemal light chain 4 OS=Mus musculus OX=10090 GN=Dnal4 PE=3 SV=2 && PF01221:Dynein light chain type 1
Cg17122	12.2002	29.4286	13.3343	12.0199	18.0068	- && sp|Q32KN5|DNAL4_BOVIN Dynein axonemal light chain 4 OS=Bos taurus OX=9913 GN=DNAL4 PE=3 SV=1 && PF12796:Ankyrin repeats (3 copies)
Cg17123	0.768964	1.08781	0.45955	1.23569	0.793737	- && - && -
Cg17157	224.127	57.0095	66.0842	59.9602	16.0731	- && sp|P57093|PAHX_RAT Phytanoyl-CoA dioxygenase, peroxisomal OS=Rattus norvegicus OX=10116 GN=Phyh PE=1 SV=2 && PF05721:Phytanoyl-CoA dioxygenase (PhyH)
Cg17163	11.9793	30.6735	9.71469	30.4828	23.9035	- && sp|P07201|RIR2_SPISO Ribonucleoside-diphosphate reductase small chain OS=Spisula solidissima OX=6584 PE=2 SV=2 && PF00268:Ribonucleotide reductase, small chain
Cg17165	10.3475	10.4817	4.33339	9.80033	11.9333	- && sp|P35659|DEK_HUMAN Protein DEK OS=Homo sapiens OX=9606 GN=DEK PE=1 SV=1 && PF08766:DEK C terminal domain
Cg17171	1.19583	3.95546	1.20631	1.20632	4.26057	- && sp|P33610|PRI2_MOUSE DNA primase large subunit OS=Mus musculus OX=10090 GN=Prim2 PE=1 SV=1 && PF04104:Eukaryotic and archaeal DNA primase, large subunit
Cg17177	1.48975	3.2467	0.979954	5.09447	2.152	- && sp|P35408|PE2R4_HUMAN Prostaglandin E2 receptor EP4 subtype OS=Homo sapiens OX=9606 GN=PTGER4 PE=1 SV=1 && PF00001:7 transmembrane receptor (rhodopsin family)
Cg17178	0.111955	1.21141	0.0261201	0.823466	0.0515804	- && sp|P35408|PE2R4_HUMAN Prostaglandin E2 receptor EP4 subtype OS=Homo sapiens OX=9606 GN=PTGER4 PE=1 SV=1 && PF00001:7 transmembrane receptor (rhodopsin family)
Cg17179	13.9384	12.5303	41.0048	18.9207	16.5109	- && sp|P35408|PE2R4_HUMAN Prostaglandin E2 receptor EP4 subtype OS=Homo sapiens OX=9606 GN=PTGER4 PE=1 SV=1 && PF00001:7 transmembrane receptor (rhodopsin family)
Cg17194	7.67874	15.6288	8.08138	12.7766	3.59032	- && sp|Q8BP92|RCN2_MOUSE Reticulocalbin-2 OS=Mus musculus OX=10090 GN=Rcn2 PE=1 SV=1 && PF13499:EF-hand domain pair
Cg17195	2.872	2.02331	6.19814	3.24722	2.50354	- && sp|Q13823|NOG2_HUMAN Nucleolar GTP-binding protein 2 OS=Homo sapiens OX=9606 GN=GNL2 PE=1 SV=1 && PF08153:NGP1NT (NUC091) domain|PF01926:50S ribosome-binding GTPase
Cg17201	15.3331	15.0437	41.6777	16.8274	16.0712	- && sp|O14901|KLF11_HUMAN Krueppel-like factor 11 OS=Homo sapiens OX=9606 GN=KLF11 PE=1 SV=2 && -
Cg17202	5.23961	8.80369	21.8117	9.30059	2.61043	- && - && -
Cg17244	1.18718	0.0387115	2.1679	1.77233	0.608053	- && sp|P14316|IRF2_HUMAN Interferon regulatory factor 2 OS=Homo sapiens OX=9606 GN=IRF2 PE=1 SV=2 && PF00605:Interferon regulatory factor transcription factor
Cg17259	0.247296	0.109773	2.56155	2.08147	0.611431	- && sp|Q58D56|DRG2_BOVIN Developmentally-regulated GTP-binding protein 2 OS=Bos taurus OX=9913 GN=DRG2 PE=2 SV=1 && PF16897:C-terminal region of MMR_HSR1 domain|PF02824:TGS domain|PF01926:50S ribosome-binding GTPase
Cg17264	0.740949	0.0433425	0.540294	0.411005	1.52752	- && - && -
Cg17274	0.447506	0.163432	1.19602	0.119445	0.393134	- && - && PF00019:Transforming growth factor beta like domain|PF00688:TGF-beta propeptide
Cg17288	204.959	296.844	468.362	195.081	520.099	- && sp|Q2KII4|ELOC_BOVIN Elongin-C OS=Bos taurus OX=9913 GN=ELOC PE=1 SV=1 && PF03931:Skp1 family, tetramerisation domain
Cg17296	7.48017	29.8888	5.77534	17.666	19.1861	- && sp|P07201|RIR2_SPISO Ribonucleoside-diphosphate reductase small chain OS=Spisula solidissima OX=6584 PE=2 SV=2 && PF00268:Ribonucleotide reductase, small chain
Cg17325	0.0507331	0.257603	0.520166	0.36976	3.57231	- && sp|Q15293|RCN1_HUMAN Reticulocalbin-1 OS=Homo sapiens OX=9606 GN=RCN1 PE=1 SV=1 && -
Cg17327	33.5493	14.5479	31.703	38.376	49.2114	- && - && PF00066:LNR domain
Cg17332	10.1806	8.29533	36.2673	18.2323	20.0627	- && - && -
Cg17339	4.16306	1.40467	3.53619	3.11739	4.90027	- && sp|Q6GM65|PLAP_XENLA Phospholipase A-2-activating protein OS=Xenopus laevis OX=8355 GN=plaa PE=2 SV=2 && PF00400:WD domain, G-beta repeat|PF08324:PUL domain|PF09070:PFU (PLAA family ubiquitin binding)
Cg17341	2.55721	0.907047	2.28705	0.00908055	1.51233	- && - && -
Cg17376	0.128949	0.0532319	0.466562	0.0457567	0.203057	- && sp|P28827|PTPRM_HUMAN Receptor-type tyrosine-protein phosphatase mu OS=Homo sapiens OX=9606 GN=PTPRM PE=1 SV=2 && PF00102:Protein-tyrosine phosphatase|PF00084:Sushi repeat (SCR repeat)
Cg17377	6.28189	17.8569	350.175	92.4169	17.4836	- && sp|A9XE49|IL17L_CRAGI Interleukin 17-like protein OS=Crassostrea gigas OX=29159 PE=2 SV=1 && PF06083:Interleukin-17
Cg17385	1.76591	4.81187	1.59569	2.95063	3.56498	- && sp|C3YWU0|FUCO_BRAFL Alpha-L-fucosidase OS=Branchiostoma floridae OX=7739 GN=BRAFLDRAFT_56888 PE=3 SV=2 && PF16757:Alpha-L-fucosidase C-terminal domain|PF01120:Alpha-L-fucosidase
Cg17425	11.4508	7.84381	20.289	19.6916	16.4384	- && sp|Q7ZZ00|ZN511_DANRE Zinc finger protein 511 OS=Danio rerio OX=7955 GN=znf511 PE=2 SV=1 && -
Cg17426	1.03561	4.22894	1.65742	1.92041	7.75528	- && sp|P23098|DYHC_TRIGR Dynein beta chain, ciliary OS=Tripneustes gratilla OX=7673 PE=1 SV=1 && PF08385:Dynein heavy chain, N-terminal region 1|PF18199:Dynein heavy chain C-terminal domain|PF12781:ATP-binding dynein motor region|PF12780:P-loop containing dynein motor region D4|PF17857:AAA+ lid domain|PF12775:P-loop containing dynein motor region|PF12774:Hydrolytic ATP binding site of dynein mot…
Cg17438	177.232	223.086	81.4117	52.6879	130.683	- && - && -
Cg17439	9.31197	6.13204	13.461	7.68878	10.5336	- && sp|P14316|IRF2_HUMAN Interferon regulatory factor 2 OS=Homo sapiens OX=9606 GN=IRF2 PE=1 SV=2 && PF00605:Interferon regulatory factor transcription factor
Cg17446	13.5405	25.4483	11.0198	27.1713	55.2581	- && sp|P56597|NDK5_HUMAN Nucleoside diphosphate kinase homolog 5 OS=Homo sapiens OX=9606 GN=NME5 PE=1 SV=1 && PF00334:Nucleoside diphosphate kinase|PF05186:Dpy-30 motif
Cg17447	3.85189	6.60814	0.886772	17.3021	0.940818	- && sp|Q8NFT2|STEA2_HUMAN Metalloreductase STEAP2 OS=Homo sapiens OX=9606 GN=STEAP2 PE=1 SV=3 && PF03807:NADP oxidoreductase coenzyme F420-dependent|PF01794:Ferric reductase like transmembrane component
Cg17449	23.0658	22.9357	116.696	48.9417	21.7887	- && sp|P45842|RL34_AEDAL 60S ribosomal protein L34 OS=Aedes albopictus OX=7160 GN=RpL34 PE=2 SV=2 && PF01199:Ribosomal protein L34e
Cg17465	1.52997	2.05238	3.47376	7.91469	1.71513	- && sp|Q9VUL9|FUCTA_DROME Glycoprotein 3-alpha-L-fucosyltransferase A OS=Drosophila melanogaster OX=7227 GN=FucTA PE=2 SV=2 && PF17039:Fucosyltransferase, N-terminal|PF00852:Glycosyltransferase family 10 (fucosyltransferase) C-term
Cg17468	2.54829	5.54716	0.834284	0.190896	1.7492	- && sp|P42325|NCAH_DROME Neurocalcin homolog OS=Drosophila melanogaster OX=7227 GN=Nca PE=1 SV=2 && PF13499:EF-hand domain pair|PF13833:EF-hand domain pair
Cg17471	1.67842	1.47798	4.19236	0.858581	0.770033	- && - && PF00019:Transforming growth factor beta like domain|PF00688:TGF-beta propeptide
Cg17475	0.166245	1.00208	0	0	0.26519	- && - && PF00619:Caspase recruitment domain
Cg17481	0.742792	0.87614	0.529785	1.68209	0.161528	- && - && PF00619:Caspase recruitment domain|PF16095:C-terminal of Roc, COR, domain
Cg17483	0	0	0.479136	0.0793734	0.114499	- && sp|Q96MB7|HARB1_HUMAN Putative nuclease HARBI1 OS=Homo sapiens OX=9606 GN=HARBI1 PE=1 SV=1 && PF13873:Myb/SANT-like DNA-binding domain
Cg17488	1.72024	2.00974	0.852202	1.32043	4.67493	- && - && PF08477:Ras of Complex, Roc, domain of DAPkinase|PF16095:C-terminal of Roc, COR, domain
Cg17494	1.34135	9.532	1.50285	4.81529	0.188704	- && sp|P91924|ARF_DUGJA ADP-ribosylation factor OS=Dugesia japonica OX=6161 PE=2 SV=3 && PF00025:ADP-ribosylation factor family
Cg17506	3.08013	2.95338	0.901694	3.74895	2.37627	- && sp|O97125|HSP68_DROME Heat shock protein 68 OS=Drosophila melanogaster OX=7227 GN=Hsp68 PE=1 SV=1 && PF10639:Putative transmembrane family 234|PF00012:Hsp70 protein
Cg17527	6.16981	22.8364	8.51803	16.9986	12.2457	- && - && PF07412:Geminin
Cg17547	49.5404	48.0178	131.738	33.3195	17.3895	- && - && -
Cg17559	0.818263	1.04655	0.892082	0.359882	1.33025	- && sp|Q09LZ8|CBPC6_MOUSE Cytosolic carboxypeptidase 6 OS=Mus musculus OX=10090 GN=Agbl4 PE=1 SV=1 && PF00246:Zinc carboxypeptidase|PF18027:Cytosolic carboxypeptidase N-terminal domain
Cg17564	0.0875082	0.56957	0.150115	1.49094	0.176406	- && sp|Q9BRZ2|TRI56_HUMAN E3 ubiquitin-protein ligase TRIM56 OS=Homo sapiens OX=9606 GN=TRIM56 PE=1 SV=3 && PF13445:RING-type zinc-finger
Cg17583	59.593	60.9948	51.4809	79.03	31.932	- && sp|Q96EQ0|SGTB_HUMAN Small glutamine-rich tetratricopeptide repeat-containing protein beta OS=Homo sapiens OX=9606 GN=SGTB PE=1 SV=1 && PF00515:Tetratricopeptide repeat|PF16546:Homodimerisation domain of SGTA
Cg17598	1.78016	5.67693	1.77849	7.82612	7.05622	- && - && PF18595:Designed helical repeat protein 10 domain|PF03800:Nuf2 family
Cg17615	123.732	122.174	297.376	117.84	120.415	- && - && PF13621:Cupin-like domain
Cg17635	0.580244	2.6491	0.357849	1.23491	2.20632	- && sp|Q5HZL1|ERI2_XENLA ERI1 exoribonuclease 2 OS=Xenopus laevis OX=8355 GN=eri2 PE=2 SV=1 && PF00929:Exonuclease|PF06839:GRF zinc finger
Cg17639	2.25374	0.452965	1.37156	3.04653	3.76621	- && sp|Q8TEK3|DOT1L_HUMAN Histone-lysine N-methyltransferase, H3 lysine-79 specific OS=Homo sapiens OX=9606 GN=DOT1L PE=1 SV=3 && PF08123:Histone methylation protein DOT1
Cg17645	0.123842	1.00017	0.0734954	0.151961	0.929838	- && - && -
Cg17655	1.1527	2.97858	0.604438	0.737981	0.411311	- && sp|Q02962|PAX2_HUMAN Paired box protein Pax-2 OS=Homo sapiens OX=9606 GN=PAX2 PE=1 SV=4 && PF00292:'Paired box' domain
Cg17665	1.00284	0.593479	0.586158	1.75475	0.56523	- && - && PF00651:BTB/POZ domain
Cg17682	39.7804	10.5673	22.8314	21.2703	10.9429	- && - && PF00622:SPRY domain
Cg17694	10.6364	5.11101	5.75014	4.64845	1.82143	- && - && -
Cg17698	3.8274	5.36233	1.59298	0.648651	1.05024	- && - && -
Cg17704	2.97137	0.214325	9.58693	6.49096	1.40698	- && - && PF01391:Collagen triple helix repeat (20 copies)
Cg17711	5773.25	5430.62	10886.1	3085.19	1965.24	- && - && -
Cg17715	1.22396	31.7359	37.7503	9.80169	2.39902	- && - && -
Cg17727	3.4229	8.37842	3.60727	4.27354	7.71451	- && - && PF14988:Domain of unknown function (DUF4515)
Cg17743	0	0.732407	0	0.712127	0.605551	- && - && PF03281:Mab-21 protein
Cg17752	9.65284	20.8491	9.9443	4.47288	4.84183	- && sp|Q5ZKD4|NPL_CHICK N-acetylneuraminate lyase OS=Gallus gallus OX=9031 GN=NPL PE=2 SV=1 && PF00701:Dihydrodipicolinate synthetase family
Cg17766	0.215433	0.80169	0.155934	0.653913	1.02876	- && sp|A4D2P6|GRD2I_HUMAN Delphilin OS=Homo sapiens OX=9606 GN=GRID2IP PE=3 SV=2 && PF02181:Formin Homology 2 Domain|PF17820:PDZ domain
Cg17770	0.0995016	0.427581	0.0865305	2.61823	20.1572	- && sp|B3EWY9|MLP_ACRMI Mucin-like protein (Fragment) OS=Acropora millepora OX=45264 PE=1 SV=1 && PF00090:Thrombospondin type 1 domain|PF00054:Laminin G domain
Cg17772	0.970145	0.457988	0.55887	0.363179	1.34252	- && - && PF03281:Mab-21 protein
Cg17774	0.475942	0.512259	0.10163	0.0551761	0.249167	- && sp|O94778|AQP8_HUMAN Aquaporin-8 OS=Homo sapiens OX=9606 GN=AQP8 PE=1 SV=2 && PF00230:Major intrinsic protein
Cg17776	1.4516	7.29852	0.919518	0.500443	0.85842	- && sp|P56404|AQP8_MOUSE Aquaporin-8 OS=Mus musculus OX=10090 GN=Aqp8 PE=2 SV=1 && PF00230:Major intrinsic protein
Cg17783	9.04096	1.41292	2.70237	6.5255	1.99899	- && sp|O43490|PROM1_HUMAN Prominin-1 OS=Homo sapiens OX=9606 GN=PROM1 PE=1 SV=1 && PF05478:Prominin
Cg17790	4.30853	8.11673	3.23731	6.90063	7.34276	- && sp|A7M7B9|NTH_CHICK Endonuclease III-like protein 1 OS=Gallus gallus OX=9031 GN=NTHL1 PE=2 SV=1 && PF00730:HhH-GPD superfamily base excision DNA repair protein|PF00633:Helix-hairpin-helix motif
Cg17802	5.02113	1.10244	2.43339	2.02707	1.86968	- && sp|Q99758|ABCA3_HUMAN Phospholipid-transporting ATPase ABCA3 OS=Homo sapiens OX=9606 GN=ABCA3 PE=1 SV=2 && PF12698:ABC-2 family transporter protein|PF00005:ABC transporter
Cg17815	66.9055	30.5396	73.1596	25.5094	37.7804	- && sp|Q91YE8|SYNP2_MOUSE Synaptopodin-2 OS=Mus musculus OX=10090 GN=Synpo2 PE=1 SV=2 && PF00595:PDZ domain
Cg17816	17.6859	7.98353	16.6326	10.0389	3.96327	- && - && -
Cg17817	9.59708	30.839	10.3043	23.8496	24.1339	- && - && -
Cg17819	1.77568	1.86923	1.12587	0.89805	2.56008	- && sp|O09160|FUT1_MOUSE Galactoside alpha-(1,2)-fucosyltransferase 1 OS=Mus musculus OX=10090 GN=Fut1 PE=1 SV=2 && PF01531:Glycosyl transferase family 11
Cg17825	0.917229	3.91613	0.782002	0.316731	0.802749	- && sp|Q866E6|FUT1_AOTAZ Galactoside alpha-(1,2)-fucosyltransferase 1 OS=Aotus azarae OX=30591 GN=FUT1 PE=3 SV=1 && PF01531:Glycosyl transferase family 11
Cg17846	4.46302	6.37538	2.17872	1.33069	2.24287	- && sp|Q8R508|FAT3_RAT Protocadherin Fat 3 OS=Rattus norvegicus OX=10116 GN=Fat3 PE=1 SV=1 && PF00028:Cadherin domain
Cg17866	1.70103	0.703688	1.89057	0.897059	0.429619	- && sp|Q8N461|FXL16_HUMAN F-box/LRR-repeat protein 16 OS=Homo sapiens OX=9606 GN=FBXL16 PE=2 SV=2 && -
Cg17877	0.674901	0.280437	0.502258	0.0662794	1.00357	- && - && PF00386:C1q domain
Cg17892	2.13154	3.24902	1.3431	0.725362	0.413083	- && sp|Q90922|NET1_CHICK Netrin-1 OS=Gallus gallus OX=9031 GN=NTN1 PE=1 SV=1 && PF01759:UNC-6/NTR/C345C module|PF00055:Laminin N-terminal (Domain VI)|PF00053:Laminin EGF domain
Cg17908	0.00966308	0.533109	0.25503	0.190243	5.03357	- && - && -
Cg17909	0.179346	0.162324	0.544422	0.883646	0.0156502	- && sp|P23414|ACH1_SCHGR Acetylcholine receptor subunit alpha-L1 OS=Schistocerca gregaria OX=7010 PE=2 SV=1 && PF02931:Neurotransmitter-gated ion-channel ligand binding domain|PF02932:Neurotransmitter-gated ion-channel transmembrane region
Cg17912	2.88723	4.93278	0.769052	0.89284	1.81846	- && - && -
Cg17917	5.24724	12.6628	5.06473	11.1491	13.4599	- && sp|Q9NQM4|DAAF6_HUMAN Dynein axonemal assembly factor 6 OS=Homo sapiens OX=9606 GN=DNAAF6 PE=1 SV=1 && PF18201:PIH1 CS-like domain
Cg17922	0.773831	0.1278	0.738965	0.97233	0.0790869	- && - && -
Cg17932	3.24492	2.4039	6.85948	5.29863	6.49986	- && sp|Q55E58|PATS1_DICDI Probable serine/threonine-protein kinase pats1 OS=Dictyostelium discoideum OX=44689 GN=pats1 PE=3 SV=1 && PF08477:Ras of Complex, Roc, domain of DAPkinase|PF16095:C-terminal of Roc, COR, domain|PF00531:Death domain
Cg17968	0.638158	3.6768	1.04225	1.97163	5.4808	- && sp|Q08BC4|STPG2_DANRE Sperm-tail PG-rich repeat-containing protein 2 OS=Danio rerio OX=7955 GN=stpg2 PE=2 SV=1 && -
Cg17973	80.8441	20.1601	47.6717	37.5378	34.5674	- && sp|P18163|ACSL1_RAT Long-chain-fatty-acid--CoA ligase 1 OS=Rattus norvegicus OX=10116 GN=Acsl1 PE=1 SV=1 && PF00501:AMP-binding enzyme
Cg17983	1.45888	2.75932	2.11234	0.0173846	1.42902	- && sp|Q9M2U3|ALPL_ARATH Protein ALP1-like OS=Arabidopsis thaliana OX=3702 GN=At3g55350 PE=2 SV=1 && PF13359:DDE superfamily endonuclease|PF13837:Myb/SANT-like DNA-binding domain
Cg17986	4.77244	4.31239	11.4692	2.37124	4.88416	- && sp|Q9XT77|SC5A6_RABIT Sodium-dependent multivitamin transporter OS=Oryctolagus cuniculus OX=9986 GN=SLC5A6 PE=2 SV=1 && PF00474:Sodium:solute symporter family
Cg17996	54.5487	27.685	60.0053	19.6894	31.3519	- && sp|Q66HS7|PDLI3_RAT PDZ and LIM domain protein 3 OS=Rattus norvegicus OX=10116 GN=Pdlim3 PE=1 SV=2 && PF00595:PDZ domain
Cg18008	0.927883	0.595745	2.64089	24.715	79.0955	- && sp|Q8CFH6|SIK2_MOUSE Serine/threonine-protein kinase SIK2 OS=Mus musculus OX=10090 GN=Sik2 PE=1 SV=1 && PF00069:Protein kinase domain
Cg18013	0.19148	0.51894	0.284874	11.8248	0.443269	- && sp|P70031|CCKAR_XENLA Cholecystokinin receptor OS=Xenopus laevis OX=8355 GN=cckar PE=2 SV=1 && PF00001:7 transmembrane receptor (rhodopsin family)
Cg18026	5.00608	23.7648	7.96046	16.1734	11.5439	- && sp|Q8WWF8|CAPSL_HUMAN Calcyphosin-like protein OS=Homo sapiens OX=9606 GN=CAPSL PE=2 SV=4 && PF13499:EF-hand domain pair
Cg18028	27.6291	231.671	76.8568	134.204	138.076	- && sp|P06180|HIBN_XENLA Histone-binding protein N1/N2 OS=Xenopus laevis OX=8355 PE=1 SV=3 && PF10516:SHNi-TPR
Cg18040	0.999007	0.959151	0.927558	0.554809	1.57286	- && sp|Q9ULI1|NWD2_HUMAN NACHT and WD repeat domain-containing protein 2 OS=Homo sapiens OX=9606 GN=NWD2 PE=2 SV=3 && PF05729:NACHT domain
Cg18052	0	0	0	0.141296	2.66776	- && - && -
Cg18062	4.64319	7.72162	6.30503	3.72189	13.5911	- && sp|Q8BI79|CCD40_MOUSE Coiled-coil domain-containing protein 40 OS=Mus musculus OX=10090 GN=Ccdc40 PE=1 SV=1 && PF08647:BRE1 E3 ubiquitin ligase
Cg18079	2.93389	10.7078	5.60519	3.20543	10.9779	- && sp|A4IHB9|SL9B2_XENTR Sodium/hydrogen exchanger 9B2 OS=Xenopus tropicalis OX=8364 GN=slc9b2 PE=2 SV=1 && -
Cg18087	0.0358815	0.143464	0.028455	0.0143535	0.702115	- && sp|Q5UU75|DMTA2_DANRE Doublesex- and mab-3-related transcription factor A2 OS=Danio rerio OX=7955 GN=dmrta2 PE=2 SV=1 && PF00751:DM DNA binding domain|PF03474:DMRTA motif
Cg18091	2.71292	7.31948	3.4722	4.74745	6.29244	- && - && -
Cg18098	2.02258	8.12197	2.91784	2.4115	4.60174	- && - && -
Cg18104	0	0.00734462	0.308966	0	0.0150423	- && - && PF02902:Ulp1 protease family, C-terminal catalytic domain|PF10551:MULE transposase domain
Cg18106	3.98354	4.69991	2.37439	1.47626	5.18105	- && sp|P20073|ANXA7_HUMAN Annexin A7 OS=Homo sapiens OX=9606 GN=ANXA7 PE=1 SV=3 && PF00191:Annexin
Cg18112	1.05365	2.04915	0.616925	1.6934	2.52616	- && - && -
Cg18155	1.27467	0.289725	0	0.641191	9.15552	- && - && -
Cg18177	0.86239	2.46322	1.36267	3.39806	11.5685	- && sp|Q08BD8|MTRF2_DANRE Mitochondrial fission regulator 2 OS=Danio rerio OX=7955 GN=mtfr2 PE=2 SV=1 && PF05308:Mitochondrial fission regulator
Cg18201	3.84176	1.16475	3.66531	3.51243	3.63265	- && sp|O70496|CLCN7_MOUSE H(+)/Cl(-) exchange transporter 7 OS=Mus musculus OX=10090 GN=Clcn7 PE=1 SV=1 && PF00654:Voltage gated chloride channel
Cg18203	0.0808498	0.278122	0.125447	0.0107807	0.518719	- && sp|Q8BFW4|TRI65_MOUSE Tripartite motif-containing protein 65 OS=Mus musculus OX=10090 GN=Trim65 PE=1 SV=1 && PF13445:RING-type zinc-finger
Cg18204	0.183262	0	0.207114	0.354758	0.222046	- && sp|Q8NE00|TM104_HUMAN Transmembrane protein 104 OS=Homo sapiens OX=9606 GN=TMEM104 PE=1 SV=2 && PF01490:Transmembrane amino acid transporter protein
Cg18216	2.53498	5.47467	1.99995	7.52074	13.6356	- && sp|Q9Y547|IFT25_HUMAN Intraflagellar transport protein 25 homolog OS=Homo sapiens OX=9606 GN=HSPB11 PE=1 SV=1 && PF00754:F5/8 type C domain
Cg18217	1.3122	7.17719	1.00318	5.42319	2.70398	- && sp|Q4KM95|LRC42_RAT Leucine-rich repeat-containing protein 42 OS=Rattus norvegicus OX=10116 GN=Lrrc42 PE=1 SV=1 && -
Cg18221	7.15914	6.07739	15.16	7.17672	11.8685	- && - && PF00059:Lectin C-type domain
Cg18258	29.9295	12.1325	27.0515	20.7225	24.8971	- && sp|Q76MZ1|CYH1_CHLAE Cytohesin-1 OS=Chlorocebus aethiops OX=9534 GN=CYTH1 PE=2 SV=1 && PF00169:PH domain|PF01369:Sec7 domain
Cg18271	0.673823	0.325384	2.39268	0.829453	0.285783	- && sp|P08228|SODC_MOUSE Superoxide dismutase [Cu-Zn] OS=Mus musculus OX=10090 GN=Sod1 PE=1 SV=2 && PF00080:Copper/zinc superoxide dismutase (SODC)
Cg18283	5.40808	1.53426	4.52503	5.35062	4.41048	- && sp|Q9VKJ9|C2D1_DROME Coiled-coil and C2 domain-containing protein 1-like OS=Drosophila melanogaster OX=7227 GN=l(2)gd1 PE=1 SV=1 && PF00168:C2 domain
Cg18287	0	0	0	0	0.471566	- && - && -
Cg18290	11.8362	22.3349	9.34046	23.6519	26.9492	- && sp|Q08DP0|PGM1_BOVIN Phosphoglucomutase-1 OS=Bos taurus OX=9913 GN=PGM1 PE=2 SV=1 && PF02880:Phosphoglucomutase/phosphomannomutase, alpha/beta/alpha domain III|PF02879:Phosphoglucomutase/phosphomannomutase, alpha/beta/alpha domain II|PF02878:Phosphoglucomutase/phosphomannomutase, alpha/beta/alpha domain I
Cg18315	3.47669	8.28682	3.28755	10.329	11.4243	- && - && PF08286:Spc24 subunit of Ndc80
Cg18331	20.0073	38.1162	17.5341	24.1036	24.2147	- && - && PF13855:Leucine rich repeat
Cg18339	727.889	408.886	1211.94	174.289	244.927	- && sp|G9JJU2|GPX_PROCL Glutathione peroxidase OS=Procambarus clarkii OX=6728 GN=GPx PE=2 SV=1 && PF00255:Glutathione peroxidase
Cg18341	0.0173015	0.952463	0.11739	0.0161664	0.0685968	- && - && -
Cg18354	10.1304	21.8786	9.56073	15.1891	30.2916	- && sp|Q8TBZ9|TEX47_HUMAN Testis-expressed protein 47 OS=Homo sapiens OX=9606 GN=TEX47 PE=1 SV=1 && -
Cg18356	0.934978	0.396729	1.92577	0.490368	0.610823	- && sp|Q9Y5X5|NPFF2_HUMAN Neuropeptide FF receptor 2 OS=Homo sapiens OX=9606 GN=NPFFR2 PE=1 SV=2 && PF00001:7 transmembrane receptor (rhodopsin family)
Cg18398	1.91606	5.89155	0.578247	0	3.67529	- && - && -
Cg18415	1.81433	16.753	4.53589	41.6354	54.9963	- && sp|A4II40|F166C_XENTR Protein FAM166C OS=Xenopus tropicalis OX=8364 GN=fam166c PE=2 SV=1 && PF10629:Protein of unknown function (DUF2475)
Cg18427	4.63588	1.78809	4.53884	2.50868	8.96581	- && - && PF15669:Coiled-coil domain-containing protein 24 family
Cg18428	5.68645	1.3685	3.83277	3.17668	0.828634	- && sp|Q0IHM1|NLS1_XENTR Sodium-dependent lysophosphatidylcholine symporter 1 OS=Xenopus tropicalis OX=8364 GN=mfsd2a PE=2 SV=1 && PF13347:MFS/sugar transport protein
Cg18437	72.4586	29.8176	58.9568	28.2889	18.8225	- && sp|Q2KIR8|TDH_BOVIN L-threonine 3-dehydrogenase, mitochondrial OS=Bos taurus OX=9913 GN=TDH PE=2 SV=1 && PF01370:NAD dependent epimerase/dehydratase family
Cg18441	125.575	63.2121	156.476	69.5693	87.7097	- && sp|Q90YI8|TAL1_TAKRU T-cell acute lymphocytic leukemia protein 1 OS=Takifugu rubripes OX=31033 GN=tal1 PE=2 SV=1 && PF00010:Helix-loop-helix DNA-binding domain
Cg18478	0.809784	1.04222	0.512214	0.53587	2.24175	- && sp|A0JP70|WDR90_XENTR WD repeat-containing protein 90 OS=Xenopus tropicalis OX=8364 GN=wdr90 PE=2 SV=1 && PF05018:Protein of unknown function (DUF667)
Cg18507	6.69918	2.39181	6.56226	8.07	7.90848	- && sp|Q5SSM3|RHG44_MOUSE Rho GTPase-activating protein 44 OS=Mus musculus OX=10090 GN=Arhgap44 PE=1 SV=1 && PF03114:BAR domain|PF00620:RhoGAP domain
Cg18512	47.7424	28.8417	61.7456	18.7728	16.7357	- && - && -
Cg18517	0.41816	0.751271	0.200258	0.180193	0.220201	- && sp|Q5SPC5|OTOF_DANRE Otoferlin OS=Danio rerio OX=7955 GN=otof PE=3 SV=1 && PF16165:Ferlin C-terminus|PF08150:FerB (NUC096) domain|PF08151:FerI (NUC094) domain|PF00168:C2 domain
Cg18522	146.639	42.0962	101.411	46.8575	37.3363	- && - && PF00622:SPRY domain
Cg18533	0.0409437	0.646807	0.0245167	1.69752	4.79621	- && - && -
Cg18536	7.82116	2.67159	6.20163	9.02925	9.50271	- && sp|Q9U943|APLP_LOCMI Apolipophorins OS=Locusta migratoria OX=7004 PE=1 SV=2 && PF09172:Domain of unknown function (DUF1943)|PF00094:von Willebrand factor type D domain|PF01347:Lipoprotein amino terminal region
Cg18552	0.715534	4.18643	0.111884	17.7209	165.013	- && - && -
Cg18571	10.7352	15.8219	3.60138	9.86823	12.2725	- && sp|F1P963|8ODP_CANLF 7,8-dihydro-8-oxoguanine triphosphatase OS=Canis lupus familiaris OX=9615 GN=NUDT1 PE=1 SV=2 && PF00293:NUDIX domain
Cg18573	4.10299	5.20292	17.2905	7.03407	25.2588	- && sp|P56486|TA2R_CHLAE Thromboxane A2 receptor OS=Chlorocebus aethiops OX=9534 GN=TBXA2R PE=2 SV=1 && PF00001:7 transmembrane receptor (rhodopsin family)
Cg18589	5.04423	5.98115	1.78843	35.9824	6.82327	- && - && -
Cg18604	3.03404	3.97073	1.52762	3.62672	2.86587	- && sp|P55866|CASP3_XENLA Caspase-3 OS=Xenopus laevis OX=8355 GN=casp3 PE=2 SV=1 && PF00656:Caspase domain
Cg18608	63.8938	36.1185	71.2115	30.341	29.1227	- && - && PF15745:AP-1 complex-associated regulatory protein
Cg18619	0.520099	1.97968	1.3829	0.117803	1.33913	- && sp|F1NEA7|DMBX1_CHICK Diencephalon/mesencephalon homeobox protein 1 OS=Gallus gallus OX=9031 GN=DMBX1 PE=2 SV=2 && PF00046:Homeodomain
Cg18624	3.02425	6.40027	6.22461	10.418	3.43659	- && sp|Q86Z23|C1QL4_HUMAN Complement C1q-like protein 4 OS=Homo sapiens OX=9606 GN=C1QL4 PE=1 SV=1 && PF00386:C1q domain
Cg18628	0.487142	4.07118	0.683253	0.0127792	0.171724	- && sp|O70212|5HT3A_CAVPO 5-hydroxytryptamine receptor 3A OS=Cavia porcellus OX=10141 GN=HTR3A PE=1 SV=1 && PF02931:Neurotransmitter-gated ion-channel ligand binding domain|PF02932:Neurotransmitter-gated ion-channel transmembrane region
Cg18630	0.0737303	1.82328	0.298549	0.0204861	0.0348731	- && sp|P43144|ACHA9_RAT Neuronal acetylcholine receptor subunit alpha-9 OS=Rattus norvegicus OX=10116 GN=Chrna9 PE=1 SV=2 && PF02931:Neurotransmitter-gated ion-channel ligand binding domain
Cg18631	0.361301	1.4148	0.16449	0.00694655	0	- && sp|Q5IS76|ACHA6_PANTR Neuronal acetylcholine receptor subunit alpha-6 OS=Pan troglodytes OX=9598 GN=CHRNA6 PE=2 SV=1 && PF02931:Neurotransmitter-gated ion-channel ligand binding domain
Cg18639	24.7273	57.1992	19.5068	34.923	18.0767	- && - && -
Cg18640	5.12274	2.8326	6.96877	5.81852	7.79301	- && sp|Q8IWF2|FXRD2_HUMAN FAD-dependent oxidoreductase domain-containing protein 2 OS=Homo sapiens OX=9606 GN=FOXRED2 PE=1 SV=1 && PF13738:Pyridine nucleotide-disulphide oxidoreductase
Cg18665	0.363142	0.0280772	0.463726	0.470963	0.379049	- && - && PF00929:Exonuclease
Cg18675	19.3211	6.63793	15.9461	12.6209	16.179	- && sp|Q9CX84|RGS19_MOUSE Regulator of G-protein signaling 19 OS=Mus musculus OX=10090 GN=Rgs19 PE=1 SV=1 && PF00615:Regulator of G protein signaling domain
Cg18686	7.53681	33.972	11.4329	38.7515	68.408	- && sp|O93388|STMN3_CHICK Stathmin-3 OS=Gallus gallus OX=9031 GN=STMN3 PE=2 SV=1 && PF00836:Stathmin family
Cg18692	3.7543	9.74736	4.5963	1.85541	1.74069	- && sp|Q0E908|HIL_DROME Hillarin OS=Drosophila melanogaster OX=7227 GN=Hil PE=1 SV=1 && -
Cg18702	0.4795	1.53091	0.845391	1.71339	4.09502	- && sp|Q02224|CENPE_HUMAN Centromere-associated protein E OS=Homo sapiens OX=9606 GN=CENPE PE=1 SV=2 && PF00225:Kinesin motor domain
Cg18707	1.24196	2.54181	0.50203	2.94257	1.4374	- && sp|A6QLY2|GPX7_BOVIN Glutathione peroxidase 7 OS=Bos taurus OX=9913 GN=GPX7 PE=2 SV=1 && PF00255:Glutathione peroxidase
Cg18711	1.60169	2.55793	0.54952	0.383151	0.642032	- && sp|Q7JQ32|GC76C_DROME Receptor-type guanylate cyclase Gyc76C OS=Drosophila melanogaster OX=7227 GN=Gyc76C PE=1 SV=1 && PF01094:Receptor family ligand binding region|PF00211:Adenylate and Guanylate cyclase catalytic domain|PF07714:Protein tyrosine and serine/threonine kinase
Cg18712	0.456145	0.0241497	0.14179	0.867081	0.106648	- && sp|P18433|PTPRA_HUMAN Receptor-type tyrosine-protein phosphatase alpha OS=Homo sapiens OX=9606 GN=PTPRA PE=1 SV=3 && PF00102:Protein-tyrosine phosphatase
Cg18716	3.13032	4.89037	1.16634	3.64459	7.61636	- && sp|P28827|PTPRM_HUMAN Receptor-type tyrosine-protein phosphatase mu OS=Homo sapiens OX=9606 GN=PTPRM PE=1 SV=2 && PF00102:Protein-tyrosine phosphatase
Cg18735	7.90592	16.052	7.16287	6.01001	19.9921	- && sp|Q16960|DYI3_HELCR Dynein intermediate chain 3, ciliary OS=Heliocidaris crassispina OX=1043166 PE=2 SV=1 && -
Cg18738	0.339964	0.0478022	0.0199523	1.80634	24.3164	- && sp|B0WYR6|WDY_CULQU WD repeat-containing protein on Y chromosome OS=Culex quinquefasciatus OX=7176 GN=WDY PE=4 SV=2 && PF13499:EF-hand domain pair
Cg18745	0	0.0441531	0	0.186562	4.55807	- && sp|Q8IWB6|TEX14_HUMAN Inactive serine/threonine-protein kinase TEX14 OS=Homo sapiens OX=9606 GN=TEX14 PE=1 SV=2 && PF07714:Protein tyrosine and serine/threonine kinase|PF12796:Ankyrin repeats (3 copies)
Cg18750	8.96641	12.3375	4.75802	4.94508	7.02023	- && - && -
Cg18792	28.5706	13.9748	29.2435	25.9952	27.1992	- && sp|P98081|DAB_DROME Protein disabled OS=Drosophila melanogaster OX=7227 GN=Dab PE=1 SV=2 && PF00640:Phosphotyrosine interaction domain (PTB/PID)
Cg18800	335.431	459.559	226.446	364.348	1079.25	- && - && -
Cg18801	1.83405	0.915008	1.13346	5.8296	1.15952	- && sp|Q9D7H3|RTCA_MOUSE RNA 3'-terminal phosphate cyclase OS=Mus musculus OX=10090 GN=RtcA PE=1 SV=2 && PF05189:RNA 3'-terminal phosphate cyclase (RTC), insert domain|PF01137:RNA 3'-terminal phosphate cyclase
Cg18804	32.895	132.648	69.757	34.8348	83.8801	- && - && -
Cg18805	0	0.892263	0.0719015	0.107945	0.312783	- && - && PF00024:PAN domain
Cg18815	8.27797	2.11548	9.21551	8.09257	11.0652	- && sp|O14522|PTPRT_HUMAN Receptor-type tyrosine-protein phosphatase T OS=Homo sapiens OX=9606 GN=PTPRT PE=1 SV=6 && PF00102:Protein-tyrosine phosphatase
Cg18816	9.791	5.4219	10.5994	8.44667	6.43632	- && sp|Q92968|PEX13_HUMAN Peroxisomal membrane protein PEX13 OS=Homo sapiens OX=9606 GN=PEX13 PE=1 SV=2 && PF07653:Variant SH3 domain|PF04088:Peroxin 13, N-terminal region
Cg18819	6.57674	10.4003	8.92139	5.60471	14.1496	- && sp|Q6INX4|ENOF1_XENLA Mitochondrial enolase superfamily member 1 OS=Xenopus laevis OX=8355 GN=enosf1 PE=2 SV=1 && PF02746:Mandelate racemase / muconate lactonizing enzyme, N-terminal domain|PF13378:Enolase C-terminal domain-like
Cg18821	14.6319	36.6933	16.8454	33.2752	66.3522	- && sp|Q9UIF3|TEKT2_HUMAN Tektin-2 OS=Homo sapiens OX=9606 GN=TEKT2 PE=1 SV=1 && PF03148:Tektin family
Cg18822	2.85286	4.26129	1.74447	3.13925	2.35899	- && sp|Q6PJF5|RHDF2_HUMAN Inactive rhomboid protein 2 OS=Homo sapiens OX=9606 GN=RHBDF2 PE=1 SV=2 && PF01694:Rhomboid family
Cg18823	2.06175	2.88031	1.09038	0.842676	0.454746	- && sp|P34056|AP2A_MOUSE Transcription factor AP-2-alpha OS=Mus musculus OX=10090 GN=Tfap2a PE=1 SV=2 && PF03299:Transcription factor AP-2
Cg18834	2.56958	2.6782	1.07345	1.40017	2.18673	- && - && PF13365:Trypsin-like peptidase domain
Cg18851	0.249509	0.256719	0.0121974	0.218233	0.0823937	- && - && PF13903:PMP-22/EMP/MP20/Claudin tight junction
Cg18878	20.9223	7.79205	27.5883	23.6837	9.07304	- && sp|Q9BZP6|CHIA_HUMAN Acidic mammalian chitinase OS=Homo sapiens OX=9606 GN=CHIA PE=1 SV=1 && PF01607:Chitin binding Peritrophin-A domain|PF00704:Glycosyl hydrolases family 18
Cg18880	1.9627	0.22029	2.2059	0.0801982	0	- && sp|Q13231|CHIT1_HUMAN Chitotriosidase-1 OS=Homo sapiens OX=9606 GN=CHIT1 PE=1 SV=1 && PF01607:Chitin binding Peritrophin-A domain|PF00704:Glycosyl hydrolases family 18
Cg18889	0.998234	4.62348	1.12705	5.39462	3.99364	- && sp|Q8CEF1|FEM1C_MOUSE Protein fem-1 homolog C OS=Mus musculus OX=10090 GN=Fem1c PE=2 SV=1 && -
Cg18894	1.99689	3.16175	1.48556	2.59863	2.96105	- && sp|O18023|IGDB2_CAEEL Ig-like and fibronectin type-III domain-containing protein 2 OS=Caenorhabditis elegans OX=6239 GN=igdb-2 PE=1 SV=4 && PF01682:DB module|PF00041:Fibronectin type III domain
Cg18897	2.52221	9.72352	2.30377	3.20182	2.63608	- && - && PF01122:Eukaryotic cobalamin-binding protein
Cg18899	1.20595	1.21394	0.365256	0.685855	1.0054	- && sp|P18461|FGFR2_CHICK Fibroblast growth factor receptor 2 OS=Gallus gallus OX=9031 GN=FGFR2 PE=2 SV=1 && PF07714:Protein tyrosine and serine/threonine kinase
Cg18901	0.0879595	0.888689	0.0961977	0.270069	0.10735	- && sp|P18461|FGFR2_CHICK Fibroblast growth factor receptor 2 OS=Gallus gallus OX=9031 GN=FGFR2 PE=2 SV=1 && PF07714:Protein tyrosine and serine/threonine kinase
Cg18905	70.9288	49.4601	104.039	63.116	72.9404	- && sp|P27447|YES_XIPHE Tyrosine-protein kinase Yes OS=Xiphophorus helleri OX=8084 GN=yes PE=2 SV=3 && PF07714:Protein tyrosine and serine/threonine kinase|PF00017:SH2 domain|PF00018:SH3 domain
Cg18915	22.0069	31.4154	12.0831	11.7554	13.1535	- && - && -
Cg18920	2.63152	6.03343	1.6773	10.273	7.19003	- && sp|Q69Z69|ESCO1_MOUSE N-acetyltransferase ESCO1 OS=Mus musculus OX=10090 GN=Esco1 PE=2 SV=2 && PF13880:ESCO1/2 acetyl-transferase|PF13878:zinc-finger of acetyl-transferase ESCO
Cg18922	0.353625	2.59987	0.502623	0.352603	0.990184	- && sp|Q8N0N9|ODH_HALDH Opine dehydrogenase OS=Haliotis discus hannai OX=42344 GN=tadh PE=2 SV=1 && PF02317:NAD/NADP octopine/nopaline dehydrogenase, alpha-helical domain
Cg18924	2.04368	4.35047	1.25727	0.356435	1.22177	- && sp|Q8N0N9|ODH_HALDH Opine dehydrogenase OS=Haliotis discus hannai OX=42344 GN=tadh PE=2 SV=1 && PF02317:NAD/NADP octopine/nopaline dehydrogenase, alpha-helical domain
Cg18930	0.306165	1.29517	0.101551	0.493552	0.358584	- && - && -
Cg18932	0	1.23958	0.0188884	0.0517806	0.0793764	- && sp|Q3USW5|FXRD2_MOUSE FAD-dependent oxidoreductase domain-containing protein 2 OS=Mus musculus OX=10090 GN=Foxred2 PE=2 SV=1 && PF13738:Pyridine nucleotide-disulphide oxidoreductase
Cg18937	7.7222	32.1106	6.56631	38.393	16.6787	- && - && -
Cg18942	0	5.44587	0	0	5.59958	- && - && -
Cg18943	34.8168	4.69583	11.61	12.8539	18.2558	- && sp|Q9I9B9|CTL1_TORMA Choline transporter-like protein 1 OS=Torpedo marmorata OX=7788 GN=slc44a1 PE=1 SV=1 && -
Cg18944	2.34541	9.56647	1.77255	1.8347	1.94666	- && - && PF12736:Cell-cycle sustaining, positive selection,
Cg18953	5.87252	9.2398	4.13477	2.9514	6.06094	- && sp|Q3TYL0|IQAK1_MOUSE IQ motif and ankyrin repeat domain-containing protein 1 OS=Mus musculus OX=10090 GN=Iqank1 PE=1 SV=3 && PF12781:ATP-binding dynein motor region|PF12796:Ankyrin repeats (3 copies)
Cg19005	1.84196	1.03105	2.29321	1.64684	0.951653	- && sp|P41233|ABCA1_MOUSE Phospholipid-transporting ATPase ABCA1 OS=Mus musculus OX=10090 GN=Abca1 PE=1 SV=4 && PF00386:C1q domain|PF04117:Mpv17 / PMP22 family|PF12698:ABC-2 family transporter protein|PF00005:ABC transporter
Cg19009	5.85798	16.2346	4.97372	12.1982	10.5783	- && sp|Q9NPJ3|ACO13_HUMAN Acyl-coenzyme A thioesterase 13 OS=Homo sapiens OX=9606 GN=ACOT13 PE=1 SV=1 && PF08241:Methyltransferase domain|PF03061:Thioesterase superfamily
Cg19018	1.57082	2.50272	0.622285	0.289753	0.476898	- && sp|Q9Y663|HS3SA_HUMAN Heparan sulfate glucosamine 3-O-sulfotransferase 3A1 OS=Homo sapiens OX=9606 GN=HS3ST3A1 PE=1 SV=1 && PF00685:Sulfotransferase domain
Cg19030	1.39809	1.92717	0.536478	0.18971	1.16308	- && - && -
Cg19070	1.01628	0.381041	1.17123	0.70439	0.952454	- && sp|Q76QY7|G3R_VAR67 Ankyrin repeat protein G3R OS=Variola virus (isolate Human/India/Ind3/1967) OX=587200 GN=G3R PE=4 SV=1 && PF12796:Ankyrin repeats (3 copies)
Cg19080	0	1.10445	0	0.0160797	0.0670348	- && sp|Q5EA66|ANGL7_BOVIN Angiopoietin-related protein 7 OS=Bos taurus OX=9913 GN=ANGPTL7 PE=2 SV=1 && PF00147:Fibrinogen beta and gamma chains, C-terminal globular domain
Cg19085	39.8604	25.2427	83.4396	40.0261	53.9732	- && sp|P27446|FYN_XIPHE Tyrosine-protein kinase Fyn OS=Xiphophorus helleri OX=8084 GN=fyn PE=2 SV=3 && PF00017:SH2 domain|PF00018:SH3 domain|PF07714:Protein tyrosine and serine/threonine kinase
Cg19093	0.860475	1.29413	0.34355	1.09588	0.382441	- && sp|P23385|GRM1_RAT Metabotropic glutamate receptor 1 OS=Rattus norvegicus OX=10116 GN=Grm1 PE=1 SV=1 && PF01094:Receptor family ligand binding region
Cg19099	7.21342	2.16191	5.4055	9.1363	9.28441	- && sp|Q8TEU7|RPGF6_HUMAN Rap guanine nucleotide exchange factor 6 OS=Homo sapiens OX=9606 GN=RAPGEF6 PE=1 SV=2 && PF00618:RasGEF N-terminal motif|PF00595:PDZ domain|PF00027:Cyclic nucleotide-binding domain|PF00617:RasGEF domain|PF00788:Ras association (RalGDS/AF-6) domain
Cg19101	5.36013	14.3964	5.85713	13.2189	10.207	- && sp|Q7ZWE3|LARP7_DANRE La-related protein 7 OS=Danio rerio OX=7955 GN=larp7 PE=2 SV=1 && PF08777:RNA binding motif|PF05383:La domain|PF00076:RNA recognition motif. (a.k.a. RRM, RBD, or RNP domain)
Cg19124	3.58158	13.0785	5.11164	3.75165	1.94291	- && - && -
Cg19133	0.543281	0.302247	0.412452	0.658235	0.204405	- && sp|E9QAM5|HELZ2_MOUSE Helicase with zinc finger domain 2 OS=Mus musculus OX=10090 GN=Helz2 PE=1 SV=1 && PF13086:AAA domain|PF13087:AAA domain|PF00773:RNB domain
Cg19154	0.0379046	0.444827	0.778994	0.833361	0.0187855	- && sp|C3ZQF9|QRFPR_BRAFL QRFP-like peptide receptor OS=Branchiostoma floridae OX=7739 GN=QRFPR PE=3 SV=1 && PF00001:7 transmembrane receptor (rhodopsin family)
Cg19161	39.4304	64.6099	25.4001	30.9782	27.1156	- && - && -
Cg19162	0.425814	0.988885	0.15767	0.244086	0.288016	- && sp|Q9ES87|PRSS8_RAT Prostasin OS=Rattus norvegicus OX=10116 GN=Prss8 PE=2 SV=3 && PF01392:Fz domain|PF15494:Scavenger receptor cysteine-rich domain|PF00089:Trypsin|PF00057:Low-density lipoprotein receptor domain class A|PF01390:SEA domain
Cg19166	18.3559	34.0119	15.2768	100.177	64.1027	- && sp|Q5PQ44|CF299_XENLA Cilia- and flagella-associated protein 299 OS=Xenopus laevis OX=8355 GN=cfap299 PE=2 SV=1 && PF14713:Domain of unknown function (DUF4464)
Cg19178	0.12715	2.65815	0.538385	0.0937007	0.0812059	- && sp|P70549|NAC3_RAT Sodium/calcium exchanger 3 OS=Rattus norvegicus OX=10116 GN=Slc8a3 PE=1 SV=1 && PF16494:C-terminal extension of sodium/calcium exchanger domain|PF01699:Sodium/calcium exchanger protein|PF03160:Calx-beta domain
Cg19180	1.6279	0.378768	0.49397	3.31647	29.258	- && sp|Q14565|DMC1_HUMAN Meiotic recombination protein DMC1/LIM15 homolog OS=Homo sapiens OX=9606 GN=DMC1 PE=1 SV=2 && PF08423:Rad51|PF14520:Helix-hairpin-helix domain
Cg19196	37.315	13.4182	38.6081	33.4433	73.5482	- && sp|Q5G270|NETR_GORGO Neurotrypsin OS=Gorilla gorilla gorilla OX=9595 GN=PRSS12 PE=3 SV=1 && PF00051:Kringle domain|PF00089:Trypsin|PF00024:PAN domain|PF00059:Lectin C-type domain|PF00530:Scavenger receptor cysteine-rich domain|PF00057:Low-density lipoprotein receptor domain class A
Cg19199	0.21746	9.81557	2.51894	4.41062	4.26418	- && sp|P0C6A0|ZGLP1_HUMAN GATA-type zinc finger protein 1 OS=Homo sapiens OX=9606 GN=ZGLP1 PE=2 SV=1 && PF00320:GATA zinc finger
Cg19205	0.581422	1.49565	0.58854	1.50625	2.27876	- && sp|Q15468|STIL_HUMAN SCL-interrupting locus protein OS=Homo sapiens OX=9606 GN=STIL PE=1 SV=2 && PF15253:SCL-interrupting locus protein N-terminus
Cg19223	9.45702	15.796	9.32233	8.02506	16.8305	- && sp|Q60HG7|CGL_MACFA Cystathionine gamma-lyase OS=Macaca fascicularis OX=9541 GN=CTH PE=2 SV=1 && PF01053:Cys/Met metabolism PLP-dependent enzyme
Cg19230	0.240753	0.685716	0.456555	5.84867	0.88314	- && sp|Q99MW1|STK31_MOUSE Serine/threonine-protein kinase 31 OS=Mus musculus OX=10090 GN=Stk31 PE=1 SV=2 && PF00076:RNA recognition motif. (a.k.a. RRM, RBD, or RNP domain)|PF00567:Tudor domain
Cg19232	0	0	0.0488837	0.0318664	0.435487	- && sp|Q8R508|FAT3_RAT Protocadherin Fat 3 OS=Rattus norvegicus OX=10116 GN=Fat3 PE=1 SV=1 && PF00028:Cadherin domain
Cg19241	0.097224	0.99744	0	0.0900462	0.0625658	- && - && -
Cg19268	1.6015	1.02842	2.83619	2.90776	1.42325	- && sp|B2IZD3|BDLP_NOSP7 Bacterial dynamin-like protein OS=Nostoc punctiforme (strain ATCC 29133 / PCC 73102) OX=63737 GN=Npun_R6513 PE=1 SV=1 && PF00350:Dynamin family|PF07714:Protein tyrosine and serine/threonine kinase
Cg19270	0.221973	0.308898	0.364434	1.03647	0.0319324	- && sp|Q9WTV7|RNF12_MOUSE E3 ubiquitin-protein ligase RLIM OS=Mus musculus OX=10090 GN=Rlim PE=1 SV=2 && PF13639:Ring finger domain
Cg19304	0.959305	1.85026	3.29091	5.07474	0.589477	- && - && PF13673:Acetyltransferase (GNAT) domain
Cg19312	0.51156	0.46223	1.17209	1.69667	7.4333	- && sp|P06867|PLMN_PIG Plasminogen OS=Sus scrofa OX=9823 GN=PLG PE=1 SV=3 && PF00057:Low-density lipoprotein receptor domain class A|PF00431:CUB domain|PF00089:Trypsin
Cg19332	4.50154	1.62981	8.22348	3.00763	3.97044	- && sp|Q804S2|BMP2_TETNG Bone morphogenetic protein 2 OS=Tetraodon nigroviridis OX=99883 GN=bmp2 PE=3 SV=2 && PF00019:Transforming growth factor beta like domain|PF00688:TGF-beta propeptide
Cg19334	14.5841	11.4903	37.6195	23.1155	21.7227	- && sp|Q9V576|WUN_DROME Putative phosphatidate phosphatase OS=Drosophila melanogaster OX=7227 GN=wun PE=1 SV=2 && PF01569:PAP2 superfamily
Cg19337	0.531062	0	0.723786	0.154877	0.421037	- && - && PF00001:7 transmembrane receptor (rhodopsin family)
Cg19369	4.46871	8.45549	3.6327	4.27257	9.31525	- && sp|Q6DHN0|TMM53_DANRE Transmembrane protein 53 OS=Danio rerio OX=7955 GN=tmem53 PE=2 SV=1 && PF05705:Eukaryotic protein of unknown function (DUF829)
Cg19372	0.269506	3.61363	0.58049	0.741597	0.482846	- && sp|P20849|CO9A1_HUMAN Collagen alpha-1(IX) chain OS=Homo sapiens OX=9606 GN=COL9A1 PE=1 SV=3 && PF01391:Collagen triple helix repeat (20 copies)
Cg19378	7.75778	18.7787	4.6851	4.11037	4.26537	- && sp|Q9CQ66|DYT2B_MOUSE Dynein light chain Tctex-type protein 2B OS=Mus musculus OX=10090 GN=Dynlt2b PE=1 SV=1 && PF03645:Tctex-1 family
Cg19383	94.231	61.974	141.336	132.114	99.5052	- && sp|O17320|ACT_CRAGI Actin OS=Crassostrea gigas OX=29159 PE=2 SV=1 && PF00022:Actin
Cg19385	2.91613	1.02713	0.161817	0.0150701	1.05109	- && sp|O93400|ACTB_XENLA Actin, cytoplasmic 1 OS=Xenopus laevis OX=8355 GN=actb PE=1 SV=1 && PF00022:Actin
Cg19389	12980.8	7244.31	14787.9	18844	16361.4	- && sp|O17320|ACT_CRAGI Actin OS=Crassostrea gigas OX=29159 PE=2 SV=1 && PF00022:Actin
Cg19393	373.298	174.622	372.789	123.944	157.403	- && sp|Q3ZBN6|GA45A_BOVIN Growth arrest and DNA damage-inducible protein GADD45 alpha OS=Bos taurus OX=9913 GN=GADD45A PE=2 SV=1 && -
Cg19398	2.76608	0.841005	4.41465	0.845112	0.559411	- && sp|P15287|AGSA_APLCA Adenosine deaminase AGSA OS=Aplysia californica OX=6500 PE=1 SV=2 && PF00962:Adenosine/AMP deaminase|PF01833:IPT/TIG domain
Cg19414	1.65953	2.83053	1.18191	1.32001	2.18959	- && sp|Q9NVE7|PANK4_HUMAN 4'-phosphopantetheine phosphatase OS=Homo sapiens OX=9606 GN=PANK4 PE=1 SV=1 && PF03630:Fumble|PF01937:Protein of unknown function DUF89
Cg19416	2.29033	5.38916	2.19497	3.69081	2.95822	- && - && -
Cg19422	0.631516	2.27293	0.824231	0.826058	0.807587	- && sp|Q8HY87|RNZ2_MACFA Zinc phosphodiesterase ELAC protein 2 OS=Macaca fascicularis OX=9541 GN=ELAC2 PE=2 SV=1 && PF12706:Beta-lactamase superfamily domain
Cg19429	7.16885	10.842	3.12715	1.15859	5.94137	- && sp|H2A0L4|CHI1_PINMG Putative chitinase 1 OS=Margaritifera margaritifera OX=102329 PE=1 SV=1 && PF00704:Glycosyl hydrolases family 18
Cg19433	1.8536	2.31582	0.825341	1.07424	0.953504	- && sp|Q5H8C1|FREM1_HUMAN FRAS1-related extracellular matrix protein 1 OS=Homo sapiens OX=9606 GN=FREM1 PE=1 SV=3 && PF16184:Cadherin-like|PF03160:Calx-beta domain|PF00059:Lectin C-type domain
Cg19436	3.1083	6.75354	4.72257	7.5693	21.6925	- && sp|Q12834|CDC20_HUMAN Cell division cycle protein 20 homolog OS=Homo sapiens OX=9606 GN=CDC20 PE=1 SV=2 && PF00400:WD domain, G-beta repeat
Cg19453	75.9694	34.06	75.7228	60.7039	41.6464	- && sp|P30710|GPX5_RAT Epididymal secretory glutathione peroxidase OS=Rattus norvegicus OX=10116 GN=Gpx5 PE=2 SV=1 && PF00255:Glutathione peroxidase
Cg19459	11.2448	5.74722	15.0475	5.28933	4.48618	- && - && -
Cg19464	65.6428	54.3937	138.149	33.2849	27.5726	- && - && -
Cg19471	0.344656	0.24079	1.18467	0.250623	0.279994	- && sp|Q8AXU4|CALRL_ONCGO Calcitonin gene-related peptide type 1 receptor OS=Oncorhynchus gorbuscha OX=8017 GN=calcrl PE=2 SV=1 && PF00002:7 transmembrane receptor (Secretin family)|PF02793:Hormone receptor domain
Cg19475	3.86803	7.52469	3.37712	3.25213	14.5559	- && sp|Q9D5E4|DRC3_MOUSE Dynein regulatory complex subunit 3 OS=Mus musculus OX=10090 GN=Drc3 PE=1 SV=1 && PF14580:Leucine-rich repeat
Cg19480	0.567507	5.49455	1.0408	6.44871	5.63501	- && - && -
Cg19491	8.99222	3.04467	7.17379	4.51997	7.34746	- && sp|O35186|CATK_RAT Cathepsin K OS=Rattus norvegicus OX=10116 GN=Ctsk PE=2 SV=1 && PF08246:Cathepsin propeptide inhibitor domain (I29)|PF00112:Papain family cysteine protease|PF09772:Transmembrane protein 26
Cg19497	3.69967	7.64972	1.96389	48.5917	106.194	- && sp|P61287|PP1G_BOVIN Serine/threonine-protein phosphatase PP1-gamma catalytic subunit OS=Bos taurus OX=9913 GN=PPP1CC PE=2 SV=1 && PF16891:Serine-threonine protein phosphatase N-terminal domain|PF00149:Calcineurin-like phosphoesterase
Cg19498	10.7375	19.2519	9.20361	10.6669	15.6381	- && sp|P26186|MGMT_CRIGR Methylated-DNA--protein-cysteine methyltransferase OS=Cricetulus griseus OX=10029 GN=MGMT PE=2 SV=1 && PF01035:6-O-methylguanine DNA methyltransferase, DNA binding domain
Cg19501	26.5785	7.22621	16.4121	15.6407	10.7573	- && sp|Q99LI8|HGS_MOUSE Hepatocyte growth factor-regulated tyrosine kinase substrate OS=Mus musculus OX=10090 GN=Hgs PE=1 SV=2 && PF01363:FYVE zinc finger|PF00790:VHS domain|PF12210:Hepatocyte growth factor-regulated tyrosine kinase substrate
Cg19517	3.60823	1.84937	4.39211	5.41335	4.76099	- && sp|O94988|FA13A_HUMAN Protein FAM13A OS=Homo sapiens OX=9606 GN=FAM13A PE=1 SV=2 && PF00620:RhoGAP domain
Cg19523	8.62842	8.82403	39.7046	16.6979	13.0528	- && sp|Q49B93|SC5AC_MOUSE Sodium-coupled monocarboxylate transporter 2 OS=Mus musculus OX=10090 GN=Slc5a12 PE=1 SV=1 && PF00474:Sodium:solute symporter family
Cg19532	7.77367	17.6431	7.7669	3.71575	4.90042	- && sp|Q6P1E8|EFCB6_MOUSE EF-hand calcium-binding domain-containing protein 6 OS=Mus musculus OX=10090 GN=Efcab6 PE=1 SV=2 && PF13499:EF-hand domain pair|PF08976:EF-hand domain
Cg19533	1.82666	0.95448	1.51606	0.917335	2.20091	- && sp|O00370|LORF2_HUMAN LINE-1 retrotransposable element ORF2 protein OS=Homo sapiens OX=9606 PE=1 SV=1 && PF18717:CxC4 like cysteine cluster associated with KDZ transposases|PF00078:Reverse transcriptase (RNA-dependent DNA polymerase)
Cg19539	2.74588	11.2176	36.0451	8.98198	6.13792	- && sp|Q9BQS2|SYT15_HUMAN Synaptotagmin-15 OS=Homo sapiens OX=9606 GN=SYT15 PE=1 SV=3 && PF00168:C2 domain
Cg19543	0.0492576	3.58235	0	0	0.0668729	- && sp|P16395|ACM1_DROME Muscarinic acetylcholine receptor DM1 OS=Drosophila melanogaster OX=7227 GN=mAChR-A PE=2 SV=2 && PF00001:7 transmembrane receptor (rhodopsin family)
Cg19546	97.1335	33.9672	78.79	44.8648	47.7262	- && - && -
Cg19554	0	2.47036	0.438913	1.5302	0.886867	- && sp|Q9PTK2|FOXE4_XENLA Forkhead box protein E4 OS=Xenopus laevis OX=8355 GN=foxe4 PE=2 SV=1 && PF00250:Forkhead domain
Cg19565	0.260128	0.144096	0.236137	0.0130572	0.605322	- && sp|P20806|7LESS_DROVI Protein sevenless OS=Drosophila virilis OX=7244 GN=sev PE=3 SV=1 && PF07714:Protein tyrosine and serine/threonine kinase
Cg19570	0.0741664	0.358021	0.0538552	0.0121834	0.250894	- && sp|P20806|7LESS_DROVI Protein sevenless OS=Drosophila virilis OX=7244 GN=sev PE=3 SV=1 && PF07714:Protein tyrosine and serine/threonine kinase
Cg19583	75.9375	25.0947	96.4736	25.1422	18.9546	- && sp|Q9UBL3|ASH2L_HUMAN Set1/Ash2 histone methyltransferase complex subunit ASH2 OS=Homo sapiens OX=9606 GN=ASH2L PE=1 SV=1 && -
Cg19595	13.151	4.79044	15.956	13.2094	8.45373	- && sp|P52564|MP2K6_HUMAN Dual specificity mitogen-activated protein kinase kinase 6 OS=Homo sapiens OX=9606 GN=MAP2K6 PE=1 SV=1 && PF00069:Protein kinase domain
Cg19596	1.17376	9.47656	1.78862	12.6392	7.13954	- && sp|Q2KHY5|FAP24_BOVIN Fanconi anemia core complex-associated protein 24 OS=Bos taurus OX=9913 GN=FAAP24 PE=2 SV=1 && PF12826:Helix-hairpin-helix motif|PF17949:FANCM pseudonuclease domain
Cg19603	14.6182	9.07422	23.6348	22.5965	22.7532	- && - && PF00641:Zn-finger in Ran binding protein and others
Cg19605	0.492435	2.17103	0.460312	0.310589	0.673316	- && - && -
Cg19606	4.53771	6.15852	1.99758	0.787539	1.8324	- && - && -
Cg19614	0.0506133	0.362595	0.261782	0.0134978	0.629082	- && - && -
Cg19626	0.318876	0.238221	0	0.712055	0	- && - && PF00059:Lectin C-type domain
Cg19632	8.53047	14.9634	10.3621	5.05368	22.2339	- && - && PF12894:Anaphase-promoting complex subunit 4 WD40 domain
Cg19635	23.6465	9.36141	40.3237	11.8851	13.7804	- && sp|Q61471|TOB1_MOUSE Protein Tob1 OS=Mus musculus OX=10090 GN=Tob1 PE=1 SV=2 && PF07742:BTG family
Cg19636	37.0424	30.3045	74.1508	27.2865	17.2983	- && - && -
Cg19648	2.84561	8.33802	4.64826	2.70229	16.882	- && sp|Q5F201|CFA52_MOUSE Cilia- and flagella-associated protein 52 OS=Mus musculus OX=10090 GN=Cfap52 PE=1 SV=1 && -
Cg19661	90.0442	76.3021	88.0908	51.1083	108.376	- && sp|P20072|ANXA7_BOVIN Annexin A7 OS=Bos taurus OX=9913 GN=ANXA7 PE=1 SV=2 && PF00191:Annexin
Cg19670	48.7594	53.6439	359.83	181.666	434.052	- && sp|A3RLT6|RSSA_PINFU 40S ribosomal protein SA OS=Pinctada fucata OX=50426 PE=2 SV=1 && PF16122:40S ribosomal protein SA C-terminus|PF00318:Ribosomal protein S2
Cg19673	44.9172	139.176	46.9071	74.6525	199.922	- && sp|C1C524|CISD2_LITCT CDGSH iron-sulfur domain-containing protein 2 OS=Lithobates catesbeianus OX=8400 GN=cisd2 PE=2 SV=1 && PF09360:Iron-binding zinc finger CDGSH type|PF10660:Iron-containing outer mitochondrial membrane protein N-terminus
Cg19701	4.80684	0.359852	2.09571	4.39182	1.30796	- && - && -
Cg19702	1.46945	3.02057	0.983744	2.41092	3.32192	- && sp|A8ZSE7|END4_DESOH Probable endonuclease 4 OS=Desulfococcus oleovorans (strain DSM 6200 / JCM 39069 / Hxd3) OX=96561 GN=nfo PE=3 SV=1 && PF01261:Xylose isomerase-like TIM barrel
Cg19705	9.361	5.17871	11.2832	15.8352	12.9091	- && sp|Q6NRT5|CSN1_XENLA COP9 signalosome complex subunit 1 OS=Xenopus laevis OX=8355 GN=csn1 PE=2 SV=1 && PF10602:26S proteasome subunit RPN7|PF01399:PCI domain
Cg19722	0.252328	0.232665	0	0.138147	0.388496	- && - && PF00078:Reverse transcriptase (RNA-dependent DNA polymerase)
Cg19723	0.78486	3.94192	0.203117	0.62791	1.50866	- && - && -
Cg19728	0.154421	0.0693219	0.329625	0.339809	10.1051	- && sp|Q4R8G6|MEIOB_MACFA Meiosis-specific with OB domain-containing protein OS=Macaca fascicularis OX=9541 GN=MEIOB PE=2 SV=1 && -
Cg19729	0.0257692	0.512049	0.258549	0.240481	8.66557	- && - && -
Cg19755	0.63591	0.241721	0.796354	0.994712	0.832052	- && - && -
Cg19758	45.7079	15.9123	101.546	32.9325	13.674	- && - && PF11669:WW domain-binding protein 1
Cg19759	255.474	158.579	458.193	214.385	245.663	- && - && -
Cg19794	1.88312	0.475171	0.199473	0.0481183	1.20628	- && sp|Q5SQS7|SH24B_HUMAN SH2 domain-containing protein 4B OS=Homo sapiens OX=9606 GN=SH2D4B PE=2 SV=1 && -
Cg19799	3.38738	8.73725	1.32885	1.52614	2.88954	- && - && -
Cg19800	0.857169	6.00407	0.552818	0.781965	3.13676	- && - && -
Cg19823	3.0303	10.2951	4.34634	1.95169	1.55925	- && sp|Q9EPR2|PG12A_MOUSE Group XIIA secretory phospholipase A2 OS=Mus musculus OX=10090 GN=Pla2g12a PE=1 SV=2 && PF06951:Group XII secretory phospholipase A2 precursor (PLA2G12)
Cg19844	3.4429	7.47365	2.22769	1.90271	3.10795	- && - && -
Cg19850	0.616068	0.230164	0.559887	0.558005	0.0655538	- && sp|Q9I9B9|CTL1_TORMA Choline transporter-like protein 1 OS=Torpedo marmorata OX=7788 GN=slc44a1 PE=1 SV=1 && PF04515:Plasma-membrane choline transporter
Cg19877	0.0767901	0.0843577	0.512316	0	1.7859	- && - && -
Cg19893	0.507742	0.762782	0.743446	0.173964	2.35251	- && - && -
Cg19894	1.21752	1.6522	2.42017	0.156577	5.68992	- && - && -
Cg19909	8.12183	5.25193	12.6037	7.63711	11.9741	- && - && PF00001:7 transmembrane receptor (rhodopsin family)
Cg19930	9.52136	14.3169	6.00137	2.24768	4.80577	- && - && -
Cg19932	2.88666	4.1706	0.538678	2.15296	3.10405	- && - && -
Cg19945	12.1842	2.62225	10.5204	4.81341	5.8127	- && sp|P43114|PE2R4_RAT Prostaglandin E2 receptor EP4 subtype OS=Rattus norvegicus OX=10116 GN=Ptger4 PE=2 SV=1 && PF00001:7 transmembrane receptor (rhodopsin family)
Cg19954	16.467	8.97888	32.0972	18.6787	16.9039	- && sp|Q4QRK0|MAP11_DANRE Methionine aminopeptidase 1 OS=Danio rerio OX=7955 GN=metap1 PE=2 SV=2 && PF00557:Metallopeptidase family M24|PF15801:zf-MYND-like zinc finger, mRNA-binding
Cg19964	21.7423	6.45179	14.6373	8.00349	10.023	- && sp|Q0VA77|ENPP4_XENTR Bis(5'-adenosyl)-triphosphatase enpp4 OS=Xenopus tropicalis OX=8364 GN=enpp4 PE=2 SV=1 && PF01663:Type I phosphodiesterase / nucleotide pyrophosphatase
Cg19991	58.578	19.0015	49.1683	22.564	35.7881	- && sp|Q9DDJ0|UBC9B_DANRE SUMO-conjugating enzyme UBC9-B OS=Danio rerio OX=7955 GN=ube2ib PE=1 SV=1 && PF00179:Ubiquitin-conjugating enzyme
Cg20006	10.9694	8.59301	19.4789	14.0888	18.372	- && sp|Q96AB6|NTAN1_HUMAN Protein N-terminal asparagine amidohydrolase OS=Homo sapiens OX=9606 GN=NTAN1 PE=1 SV=3 && PF14736:Protein N-terminal asparagine amidohydrolase
Cg20014	0.245979	0.0211711	0	0	0.390212	- && sp|Q8IVG5|SAM9L_HUMAN Sterile alpha motif domain-containing protein 9-like OS=Homo sapiens OX=9606 GN=SAMD9L PE=1 SV=2 && -
Cg20027	12.7763	8.35761	16.9308	15.3422	19.6587	- && sp|Q9V3J1|VATH_DROME V-type proton ATPase subunit H OS=Drosophila melanogaster OX=7227 GN=VhaSFD PE=2 SV=2 && PF11698:V-ATPase subunit H|PF03224:V-ATPase subunit H
Cg20033	42.2702	17.0666	49.8182	28.2096	32.6003	- && sp|O97772|CCKAR_RABIT Cholecystokinin receptor type A OS=Oryctolagus cuniculus OX=9986 GN=CCKAR PE=2 SV=1 && PF00001:7 transmembrane receptor (rhodopsin family)
Cg20038	6.6211	6.0002	10.8381	2.02486	10.451	- && - && -
Cg20051	57.3043	45.8546	96.1663	34.2975	51.0544	- && sp|Q58DT4|P5CR1_BOVIN Pyrroline-5-carboxylate reductase 1, mitochondrial OS=Bos taurus OX=9913 GN=PYCR1 PE=2 SV=1 && PF14748:Pyrroline-5-carboxylate reductase dimerisation|PF03807:NADP oxidoreductase coenzyme F420-dependent
Cg20072	79.1826	17.6371	84.8762	20.5005	4.63688	- && - && -
Cg20081	2.18584	1.53748	7.17409	1.54238	1.93061	- && - && -
Cg20083	0.151745	0.432809	0.296126	0.0900709	0.603119	- && sp|Q0P5X1|LRIQ1_MOUSE Leucine-rich repeat and IQ domain-containing protein 1 OS=Mus musculus OX=10090 GN=Lrriq1 PE=2 SV=2 && PF13855:Leucine rich repeat
Cg20090	82.103	32.0877	96.1236	58.0225	71.1767	- && sp|Q5XGP7|SKA2A_XENLA Src kinase-associated phosphoprotein 2-A OS=Xenopus laevis OX=8355 GN=skap2-a PE=2 SV=1 && PF00169:PH domain
Cg20091	0.509607	0.798523	6.35433	1.3011	1.12392	- && sp|Q9I8C7|ACH10_CHICK Neuronal acetylcholine receptor subunit alpha-10 OS=Gallus gallus OX=9031 GN=CHRNA10 PE=3 SV=1 && PF02932:Neurotransmitter-gated ion-channel transmembrane region|PF02931:Neurotransmitter-gated ion-channel ligand binding domain
Cg20107	8.65908	1.98759	7.56829	1.65089	1.73688	- && - && -
Cg20116	0.357489	0.0270085	1.7241	0.159223	1.97634	- && - && PF18014:Acetyltransferase (GNAT) domain|PF13508:Acetyltransferase (GNAT) domain
Cg20120	1.9805	4.8839	23.1005	1.64099	0.861574	- && - && -
Cg20121	4.85484	9.63096	3.71189	10.3962	6.31683	- && sp|B7Z0W9|OTOP_DROME Proton channel OtopLc OS=Drosophila melanogaster OX=7227 GN=OtopLc PE=3 SV=2 && PF03189:Otopetrin
Cg20136	26.4135	28.2705	55.3684	40.8278	33.0421	- && sp|A8QMS7|MYD88_TAKRU Myeloid differentiation primary response protein MyD88 OS=Takifugu rubripes OX=31033 GN=myd88 PE=2 SV=1 && PF13676:TIR domain|PF00531:Death domain
Cg20140	3.10848	1.01061	6.30734	2.59078	1.59608	- && sp|P22366|MYD88_MOUSE Myeloid differentiation primary response protein MyD88 OS=Mus musculus OX=10090 GN=Myd88 PE=1 SV=3 && PF13676:TIR domain
Cg20168	10.3135	6.42825	14.3309	7.42104	7.13235	- && sp|Q5RFZ7|F167A_DANRE Protein FAM167A OS=Danio rerio OX=7955 GN=fam167a PE=2 SV=1 && PF11652:FAM167
Cg20184	12.7149	6.83035	13.7055	13.4387	12.1682	- && sp|Q9NGC3|CEG1A_DROME Centaurin-gamma-1A OS=Drosophila melanogaster OX=7227 GN=CenG1A PE=2 SV=2 && PF00071:Ras family|PF01412:Putative GTPase activating protein for Arf|PF12796:Ankyrin repeats (3 copies)
Cg20186	19.4663	9.8349	19.1836	20.4703	19.5946	- && sp|Q59E55|NAB_DROME NGFI-A-binding protein homolog OS=Drosophila melanogaster OX=7227 GN=nab PE=1 SV=3 && PF04904:NAB conserved region 1 (NCD1)|PF04905:NAB conserved region 2 (NCD2)
Cg20228	5.13891	3.16511	16.5839	5.56052	2.85985	- && - && PF00822:PMP-22/EMP/MP20/Claudin family
Cg20241	69.4209	30.2969	59.6151	39.026	39.9152	- && sp|Q8WPW2|PDX1_SUBDO Pyridoxal 5'-phosphate synthase subunit SNZERR OS=Suberites domuncula OX=55567 GN=SNZERR PE=2 SV=2 && PF01174:SNO glutamine amidotransferase family|PF01680:SOR/SNZ family
Cg20245	3.06683	9.48335	2.27753	0.994687	4.48692	- && sp|O15066|KIF3B_HUMAN Kinesin-like protein KIF3B OS=Homo sapiens OX=9606 GN=KIF3B PE=1 SV=1 && PF00225:Kinesin motor domain
Cg20254	1.20672	2.21232	0.433368	0.470971	1.39208	- && sp|Q4R9E0|TECT3_MACFA Tectonic-3 OS=Macaca fascicularis OX=9541 GN=TCTN3 PE=2 SV=1 && PF07773:Protein of unknown function (DUF1619)
Cg20261	0.0839034	0.0425601	0.139904	0.190982	1.0436	- && sp|Q8K299|SCAR5_MOUSE Scavenger receptor class A member 5 OS=Mus musculus OX=10090 GN=Scara5 PE=1 SV=1 && PF00530:Scavenger receptor cysteine-rich domain
Cg20268	9.21123	4.04389	9.14919	10.8046	8.16312	- && sp|Q5TF39|MFS4B_HUMAN Sodium-dependent glucose transporter 1 OS=Homo sapiens OX=9606 GN=MFSD4B PE=1 SV=1 && PF07690:Major Facilitator Superfamily
Cg20269	34.0763	11.3588	36.2977	10.8649	10.6705	- && sp|P02518|HSP27_DROME Heat shock protein 27 OS=Drosophila melanogaster OX=7227 GN=Hsp27 PE=1 SV=2 && PF00011:Hsp20/alpha crystallin family
Cg20281	9.28163	5.21978	10.2716	5.62692	4.2553	- && sp|Q13895|BYST_HUMAN Bystin OS=Homo sapiens OX=9606 GN=BYSL PE=1 SV=3 && PF00106:short chain dehydrogenase|PF05291:Bystin
Cg20293	0.884568	1.25543	3.70673	1.8137	1.58771	- && sp|Q6AW46|EST5A_MOUSE Carboxylesterase 5A OS=Mus musculus OX=10090 GN=Ces5a PE=2 SV=1 && PF00135:Carboxylesterase family
Cg20296	1.10632	2.30254	0.935073	0.544692	0.558916	- && sp|B3EWZ5|MLRP1_ACRMI MAM and LDL-receptor class A domain-containing protein 1 (Fragment) OS=Acropora millepora OX=45264 PE=1 SV=1 && PF01400:Astacin (Peptidase family M12A)|PF00431:CUB domain|PF00629:MAM domain, meprin/A5/mu
Cg20299	0.122537	1.76287	0.799831	0.0645512	0.688759	- && sp|B3EWZ5|MLRP1_ACRMI MAM and LDL-receptor class A domain-containing protein 1 (Fragment) OS=Acropora millepora OX=45264 PE=1 SV=1 && PF00431:CUB domain|PF01400:Astacin (Peptidase family M12A)|PF00629:MAM domain, meprin/A5/mu
Cg20300	2.84607	0.729259	2.19354	2.1038	3.53916	- && - && PF00629:MAM domain, meprin/A5/mu
Cg20308	10.8914	10.5348	3.58659	5.61945	4.31483	- && sp|Q7LFX5|CHSTF_HUMAN Carbohydrate sulfotransferase 15 OS=Homo sapiens OX=9606 GN=CHST15 PE=1 SV=1 && PF00685:Sulfotransferase domain
Cg20313	5.00799	3.31351	7.28528	15.0057	5.32009	- && sp|Q32KI9|ARSI_MOUSE Arylsulfatase I OS=Mus musculus OX=10090 GN=Arsi PE=2 SV=1 && PF00884:Sulfatase
Cg20317	11.2823	2.67696	7.09623	13.1405	11.482	- && sp|Q9VX32|RG190_DROME Rho GTPase-activating protein 190 OS=Drosophila melanogaster OX=7227 GN=RhoGAPp190 PE=1 SV=2 && PF16512:p190-A and -B Rho GAPs FF domain|PF00071:Ras family|PF00620:RhoGAP domain
Cg20336	15.0491	2.37966	6.28283	14.3591	11.9486	- && sp|Q5RID7|SNX17_DANRE Sorting nexin-17 OS=Danio rerio OX=7955 GN=snx17 PE=2 SV=1 && PF00787:PX domain|PF18116:Sorting Nexin 17 FERM C-terminal domain
Cg20347	93.4575	7.10808	64.4247	84.7567	6.90104	- && - && PF00386:C1q domain
Cg20354	1.05705	1.64423	0.0638055	0.0415117	3.32984	- && - && PF13927:Immunoglobulin domain
Cg20360	1.66188	4.8636	1.35892	2.75551	5.45844	- && sp|Q5R9H4|A1CF_PONAB APOBEC1 complementation factor OS=Pongo abelii OX=9601 GN=A1CF PE=2 SV=1 && PF14709:double strand RNA binding domain from DEAD END PROTEIN 1|PF00076:RNA recognition motif. (a.k.a. RRM, RBD, or RNP domain)
Cg20381	5.15849	31.0784	9.14943	218.746	359.455	- && - && -
Cg20387	3.91842	6.70215	1.77075	0.804308	1.77997	- && sp|Q19673|TYR3_CAEEL Putative tyrosinase-like protein tyr-3 OS=Caenorhabditis elegans OX=6239 GN=tyr-3 PE=3 SV=5 && PF00264:Common central domain of tyrosinase
Cg20392	7.10021	5.76731	2.58573	8.12721	4.97952	- && sp|Q5RC46|ADA2_PONAB Adenosine deaminase 2 OS=Pongo abelii OX=9601 GN=ADA2 PE=2 SV=1 && PF08451:Adenosine/AMP deaminase N-terminal|PF00962:Adenosine/AMP deaminase
Cg20396	180.559	46.1984	4.52768	3.69203	3.95882	- && - && -
Cg20399	99.9108	6.39151	1.21976	4.50895	0	- && - && -
Cg20411	15.6017	13.7056	4.4278	11.1907	6.96229	- && sp|Q04757|HR29_HALRO Body wall muscle protein HR-29 OS=Halocynthia roretzi OX=7729 PE=1 SV=2 && PF00011:Hsp20/alpha crystallin family
Cg20414	10.4784	27.0211	9.68623	13.6956	14.387	- && sp|A1L157|TSN11_HUMAN Tetraspanin-11 OS=Homo sapiens OX=9606 GN=TSPAN11 PE=2 SV=2 && PF00335:Tetraspanin family
Cg20416	0.0848998	0.182551	0.893829	0.220166	0.184608	- && sp|Q8R4V5|OIT3_MOUSE Oncoprotein-induced transcript 3 protein OS=Mus musculus OX=10090 GN=Oit3 PE=2 SV=2 && PF00094:von Willebrand factor type D domain
Cg20420	0.115208	0.754124	0.325432	3.62651	48.1488	- && - && -
Cg20440	0.133159	0.178445	0.17274	0.506842	0.121179	- && sp|Q5TM67|NRM_MACMU Nurim OS=Macaca mulatta OX=9544 GN=NRM PE=3 SV=1 && -
Cg20457	4.06981	1.20001	3.68188	2.85982	1.68312	- && sp|Q6IR80|KICS2_XENLA KICSTOR subunit 2 OS=Xenopus laevis OX=8355 GN=kics2 PE=2 SV=1 && PF00209:Sodium:neurotransmitter symporter family
Cg20465	0.385932	0.323941	0.884878	0.619125	1.08129	- && sp|O42410|IKZF1_CHICK DNA-binding protein Ikaros OS=Gallus gallus OX=9031 GN=IKZF1 PE=2 SV=1 && -
Cg20474	0.549024	0.578647	0.34866	0.0916034	0.937125	- && sp|V5NAL9|TLR4_PINIB Toll-like receptor 4 OS=Pinctada imbricata OX=66713 PE=2 SV=1 && PF13855:Leucine rich repeat|PF01582:TIR domain
Cg20479	11.3879	6.93966	20.0157	16.295	20.1627	- && - && PF00001:7 transmembrane receptor (rhodopsin family)
Cg20482	33.2365	16.4282	62.8704	56.1445	22.5913	- && sp|Q9ER72|SYCC_MOUSE Cysteine--tRNA ligase, cytoplasmic OS=Mus musculus OX=10090 GN=Cars1 PE=1 SV=2 && PF01406:tRNA synthetases class I (C) catalytic domain
Cg20503	1.85076	0.793743	1.13177	2.14941	0.113997	- && - && PF00240:Ubiquitin family|PF02342:TerD domain
Cg20532	0.0479609	1.96553	0.197611	0.445818	1.04946	- && sp|Q91XQ5|CHSTF_MOUSE Carbohydrate sulfotransferase 15 OS=Mus musculus OX=10090 GN=Chst15 PE=2 SV=1 && PF00685:Sulfotransferase domain
Cg20537	10.3405	5.33963	11.8951	5.20171	5.15961	- && - && PF11365:Protein SOGA
Cg20552	0.0437611	0.0479602	0.113006	0	1.78626	- && - && PF00386:C1q domain
Cg20567	1.67286	0	2.85932	0	4.15408	- && - && -
Cg20569	1.98762	0.265199	1.27238	0.527504	1.02067	- && - && -
Cg20571	0.530883	1.07343	0.0730774	1.59504	0.233136	- && - && -
Cg20581	15.1072	5.79715	12.5717	11.6445	9.30506	- && sp|Q4KLT0|RN217_XENLA Probable E3 ubiquitin-protein ligase RNF217 OS=Xenopus laevis OX=8355 GN=rnf217 PE=2 SV=1 && PF01485:IBR domain, a half RING-finger domain
Cg20582	81.9549	45.5339	91.0551	50.1183	32.7104	- && sp|O95238|SPDEF_HUMAN SAM pointed domain-containing Ets transcription factor OS=Homo sapiens OX=9606 GN=SPDEF PE=1 SV=1 && PF00178:Ets-domain|PF02198:Sterile alpha motif (SAM)/Pointed domain
Cg20600	67.0715	42.9295	130.793	52.6007	74.7462	- && - && -
Cg20605	0.314539	1.05124	0.0218779	1.12676	0.407285	- && sp|Q9I9H2|DBX1_XENLA Homeobox protein DBX1 OS=Xenopus laevis OX=8355 GN=dbx1 PE=2 SV=1 && PF00046:Homeodomain
Cg20616	0.349498	0	0.692905	0	2.4247	- && - && -
Cg20618	3.56512	10.8655	1.42623	10.2426	4.84709	- && - && PF00270:DEAD/DEAH box helicase
Cg20632	5.40285	7.14816	17.2517	0.821928	1.49416	- && - && -
Cg20634	0	0.564517	0	0	3.4244	- && - && -
Cg20664	0.0859738	0.996043	0	0.526838	0.143094	- && - && PF17517:IgGFc binding protein
Cg20666	8.21928	13.5583	8.61074	10.8523	31.4895	- && sp|P29972|AQP1_HUMAN Aquaporin-1 OS=Homo sapiens OX=9606 GN=AQP1 PE=1 SV=3 && PF00230:Major intrinsic protein
Cg20676	14.9806	6.55919	23.5725	12.1949	14.9051	- && - && -
Cg20684	3.13565	0.910191	2.26489	2.72501	1.93378	- && sp|Q6Q899|DDX58_MOUSE Antiviral innate immune response receptor RIG-I OS=Mus musculus OX=10090 GN=Ddx58 PE=1 SV=2 && PF16739:Caspase recruitment domain|PF04851:Type III restriction enzyme, res subunit|PF07679:Immunoglobulin I-set domain|PF18738:DZIP3/ hRUL138-like HEPN|PF11648:C-terminal domain of RIG-I|PF00271:Helicase conserved C-terminal domain|PF18119:RIG-I receptor C-terminal domain
Cg20697	0	0	1.43713	0.0733802	0.0936853	- && - && -
Cg20699	0.96641	1.09473	0.293228	0	4.90364	- && - && -
Cg20709	0.167217	2.78264	0.228088	0.0792049	0.464339	- && sp|Q99NH7|S26A5_MOUSE Prestin OS=Mus musculus OX=10090 GN=Slc26a5 PE=2 SV=3 && PF00916:Sulfate permease family|PF01740:STAS domain
Cg20743	0.511009	0.734235	0.538404	1.2101	0	- && sp|P06602|EVE_DROME Segmentation protein even-skipped OS=Drosophila melanogaster OX=7227 GN=eve PE=1 SV=3 && PF00046:Homeodomain
Cg20746	0.01372	0.189189	0.085963	2.85185	18.9143	- && - && -
Cg20754	10.4443	55.8678	12.8261	5.50287	3.33687	- && - && PF01738:Dienelactone hydrolase family
Cg20757	54.8356	21.5179	69.4944	46.8884	66.29	- && - && -
Cg20764	32.2747	67.8637	29.3344	142.395	117.199	- && sp|Q26630|IDLC_STRPU 33 kDa inner dynein arm light chain, axonemal OS=Strongylocentrotus purpuratus OX=7668 PE=1 SV=1 && PF10211:Axonemal dynein light chain
Cg20782	4.45051	6.51992	2.89846	2.07993	2.27405	- && sp|Q01459|DIAC_HUMAN Di-N-acetylchitobiase OS=Homo sapiens OX=9606 GN=CTBS PE=1 SV=1 && PF00704:Glycosyl hydrolases family 18
Cg20786	0.917452	1.3754	0.838108	2.6756	0.852757	- && sp|Q6DCC6|GTPB6_XENLA Putative GTP-binding protein 6 OS=Xenopus laevis OX=8355 GN=gtpbp6 PE=2 SV=1 && PF16360:GTP-binding GTPase Middle Region|PF01926:50S ribosome-binding GTPase|PF13167:GTP-binding GTPase N-terminal|PF02966:Mitosis protein DIM1
Cg20788	40.284	86.4669	282.389	100.586	70.1863	- && sp|A5HNF6|MYD88_CHICK Myeloid differentiation primary response protein MyD88 OS=Gallus gallus OX=9031 GN=MYD88 PE=1 SV=1 && -
Cg20789	13.7707	9.89198	69.3395	15.1469	11.8508	- && sp|Q5XJ85|MYD88_DANRE Myeloid differentiation primary response protein MyD88 OS=Danio rerio OX=7955 GN=myd88 PE=2 SV=2 && PF13676:TIR domain
Cg20800	6.07599	81.0839	543.492	143.89	37.5294	- && - && -
Cg20814	49.1706	45.911	144.487	74.9379	60.3814	- && - && -
Cg20832	8.23289	9.03805	8.89348	11.1288	5.04833	- && sp|Q761V0|SC6A5_MOUSE Sodium- and chloride-dependent glycine transporter 2 OS=Mus musculus OX=10090 GN=Slc6a5 PE=1 SV=1 && PF00209:Sodium:neurotransmitter symporter family
Cg20840	61.6081	28.112	31.2347	60.4093	6.74325	- && - && -
Cg20873	64.0799	27.9185	105.667	71.8338	30.3198	- && sp|Q9P959|AOX_EMENI Alternative oxidase, mitochondrial OS=Emericella nidulans (strain FGSC A4 / ATCC 38163 / CBS 112.46 / NRRL 194 / M139) OX=227321 GN=alxA PE=3 SV=2 && PF01786:Alternative oxidase
Cg20879	5.43813	10.0439	4.0916	3.56099	3.29461	- && - && -
Cg20884	3.89615	0.716683	5.67576	9.64018	0.32028	- && - && PF06083:Interleukin-17
Cg20916	4.06961	13.0082	3.57521	8.74901	10.1093	- && sp|Q7ZY08|UBE2T_XENLA Ubiquitin-conjugating enzyme E2 T OS=Xenopus laevis OX=8355 GN=ube2t PE=2 SV=1 && PF00179:Ubiquitin-conjugating enzyme
Cg20919	0.0410664	6.18693	0.390267	0.25944	0.815938	- && - && -
Cg20946	0.362432	1.00426	0.294589	0.175029	0.218841	- && - && -
Cg20953	13.1535	23.8152	127.204	46.0066	45.5304	- && sp|Q2PZL6|FAT4_MOUSE Protocadherin Fat 4 OS=Mus musculus OX=10090 GN=Fat4 PE=1 SV=2 && -
Cg20974	0	0.272865	0.124215	0.88904	0	- && - && PF12695:Alpha/beta hydrolase family
Cg20999	20.2828	14.2408	28.837	10.2127	19.7389	- && - && -
Cg21007	0.607607	0.135517	5.64478	0.332508	0.646835	- && - && -
Cg21013	1.17828	1.14019	0.103618	0.10431	0.236235	- && sp|Q3U2S8|HVCN1_MOUSE Voltage-gated hydrogen channel 1 OS=Mus musculus OX=10090 GN=Hvcn1 PE=1 SV=2 && -
Cg21023	10.6266	4.78027	17.6795	15.259	12.8677	- && sp|P17666|CP2CE_RABIT Cytochrome P450 2C14 OS=Oryctolagus cuniculus OX=9986 GN=CYP2C14 PE=2 SV=1 && PF00067:Cytochrome P450
Cg21028	14.8159	8.71454	26.6677	10.6622	36.5269	- && sp|Q6PEH9|S39AA_DANRE Zinc transporter ZIP10 OS=Danio rerio OX=7955 GN=slc39a10 PE=2 SV=1 && PF02535:ZIP Zinc transporter
Cg21029	20.4006	21.4694	43.9147	44.9973	34.0018	- && - && PF04588:Hypoxia induced protein conserved region
Cg21035	0	5.97535	1.98697	1.16765	2.86636	- && - && -
Cg21037	5.59209	2.79069	7.75245	3.72658	3.02444	- && - && PF00583:Acetyltransferase (GNAT) family
Cg21044	12.8412	9.82607	20.6319	14.1198	11.9816	- && - && -
Cg21046	6.03901	8.62761	2.06996	1.34395	2.5663	- && sp|A9ZPC9|HMEN_LYMST Homeobox protein engrailed OS=Lymnaea stagnalis OX=6523 GN=EN PE=2 SV=1 && PF00046:Homeodomain|PF10525:Engrailed homeobox C-terminal signature domain
Cg21049	5.5936	10.2716	4.10757	10.5267	9.30353	- && sp|Q91WN1|DNJC9_MOUSE DnaJ homolog subfamily C member 9 OS=Mus musculus OX=10090 GN=Dnajc9 PE=1 SV=2 && PF00226:DnaJ domain
Cg21050	3.5103	3.09578	3.78336	2.78796	6.85663	- && sp|Q6PGZ3|MIPT3_DANRE TRAF3-interacting protein 1 OS=Danio rerio OX=7955 GN=traf3ip1 PE=2 SV=1 && PF10243:Microtubule-binding protein MIP-T3 CH-like domain|PF17749:Microtubule-binding protein MIP-T3 C-terminal region
Cg21060	3.91289	5.95092	0.703322	4.57742	3.71767	- && - && -
Cg21090	80.2796	47.6722	100.994	113.61	122.772	- && sp|Q3SYV4|CAP1_BOVIN Adenylyl cyclase-associated protein 1 OS=Bos taurus OX=9913 GN=CAP1 PE=2 SV=3 && PF01213:Adenylate cyclase associated (CAP) N terminal|PF00188:Cysteine-rich secretory protein family|PF08603:Adenylate cyclase associated (CAP) C terminal
Cg21095	0.578602	2.13512	0.711357	3.16754	3.98443	- && sp|P46200|MYB_BOVIN Transcriptional activator Myb OS=Bos taurus OX=9913 GN=MYB PE=2 SV=1 && PF09316:C-myb, C-terminal|PF00249:Myb-like DNA-binding domain|PF13921:Myb-like DNA-binding domain
Cg21100	5.33144	1.68709	6.17611	7.16337	8.67211	- && sp|Q9HAR2|AGRL3_HUMAN Adhesion G protein-coupled receptor L3 OS=Homo sapiens OX=9606 GN=ADGRL3 PE=1 SV=2 && PF16489:GPCR-Autoproteolysis INducing (GAIN) domain|PF00002:7 transmembrane receptor (Secretin family)|PF01825:GPCR proteolysis site, GPS, motif|PF00431:CUB domain|PF07679:Immunoglobulin I-set domain
Cg21101	0.0539321	0.0169459	0.300399	0.595147	0	- && sp|Q9UGM3|DMBT1_HUMAN Deleted in malignant brain tumors 1 protein OS=Homo sapiens OX=9606 GN=DMBT1 PE=1 SV=2 && PF00002:7 transmembrane receptor (Secretin family)|PF00530:Scavenger receptor cysteine-rich domain
Cg21104	1.22775	0.313727	1.22859	0.379709	0.730444	- && sp|Q9UGM3|DMBT1_HUMAN Deleted in malignant brain tumors 1 protein OS=Homo sapiens OX=9606 GN=DMBT1 PE=1 SV=2 && PF00530:Scavenger receptor cysteine-rich domain
Cg21106	0.997038	0.589221	1.74422	0.792168	1.47813	- && sp|Q9UGM3|DMBT1_HUMAN Deleted in malignant brain tumors 1 protein OS=Homo sapiens OX=9606 GN=DMBT1 PE=1 SV=2 && PF00530:Scavenger receptor cysteine-rich domain
Cg21115	15.7767	21.6071	10.4551	12.3686	20.4716	- && sp|A2T7G9|HTAI2_PONPY Oxidoreductase HTATIP2 OS=Pongo pygmaeus OX=9600 GN=HTATIP2 PE=3 SV=1 && PF13460:NAD(P)H-binding
Cg21122	0.330138	0.834052	0.246089	0.702121	0.555576	- && - && -
Cg21124	2.78342	11.559	2.40516	1.12402	2.3555	- && sp|Q2QVI1|CML28_ORYSJ Probable calcium-binding protein CML28 OS=Oryza sativa subsp. japonica OX=39947 GN=CML28 PE=2 SV=1 && PF13499:EF-hand domain pair
Cg21133	3.71257	6.9057	2.65586	2.8663	2.46261	- && - && -
Cg21139	66.267	37.3769	11.975	29.4292	14.5431	- && sp|Q96BD0|SO4A1_HUMAN Solute carrier organic anion transporter family member 4A1 OS=Homo sapiens OX=9606 GN=SLCO4A1 PE=1 SV=2 && PF03137:Organic Anion Transporter Polypeptide (OATP) family|PF07648:Kazal-type serine protease inhibitor domain
Cg21142	8.16202	2.47129	9.65463	9.81933	4.44469	- && sp|Q761V0|SC6A5_MOUSE Sodium- and chloride-dependent glycine transporter 2 OS=Mus musculus OX=10090 GN=Slc6a5 PE=1 SV=1 && PF00209:Sodium:neurotransmitter symporter family
Cg21155	5.16496	8.08304	2.26215	1.97552	3.77825	- && sp|Q8R1B8|RORB_MOUSE Nuclear receptor ROR-beta OS=Mus musculus OX=10090 GN=Rorb PE=1 SV=3 && PF00105:Zinc finger, C4 type (two domains)|PF00104:Ligand-binding domain of nuclear hormone receptor
Cg21195	3.29245	6.38603	18.7778	5.39401	10.2888	- && - && -
Cg21206	3.36487	3.09105	0.780094	0.620236	1.15475	- && - && PF08357:SEFIR domain
Cg21213	4.42812	1.28057	3.09531	5.27908	3.93711	- && sp|Q7Z6G8|ANS1B_HUMAN Ankyrin repeat and sterile alpha motif domain-containing protein 1B OS=Homo sapiens OX=9606 GN=ANKS1B PE=1 SV=2 && PF12796:Ankyrin repeats (3 copies)|PF07647:SAM domain (Sterile alpha motif)|PF00640:Phosphotyrosine interaction domain (PTB/PID)|PF00536:SAM domain (Sterile alpha motif)
Cg21230	0.403361	0.517856	0	0.900417	1.97531	- && sp|Q8N0N3|BGBP_PENMO Beta-1,3-glucan-binding protein OS=Penaeus monodon OX=6687 PE=2 SV=1 && PF00722:Glycosyl hydrolases family 16
Cg21253	1.01662	2.32687	0.81287	1.59521	1.72924	- && sp|Q8NBS9|TXND5_HUMAN Thioredoxin domain-containing protein 5 OS=Homo sapiens OX=9606 GN=TXNDC5 PE=1 SV=2 && PF00085:Thioredoxin
Cg21255	2.70794	2.95871	1.57309	2.12042	0.545973	- && sp|Q7SCY7|SYM1_NEUCR Protein sym-1 OS=Neurospora crassa (strain ATCC 24698 / 74-OR23-1A / CBS 708.71 / DSM 1257 / FGSC 987) OX=367110 GN=sym-1 PE=3 SV=2 && PF04117:Mpv17 / PMP22 family
Cg21261	0.990776	3.20252	0.573953	0.213561	0.513857	- && sp|Q9HBL8|NMRL1_HUMAN NmrA-like family domain-containing protein 1 OS=Homo sapiens OX=9606 GN=NMRAL1 PE=1 SV=1 && PF05368:NmrA-like family
Cg21265	8.74427	4.27478	10.3013	8.86329	19.4508	- && sp|Q4V7E1|ELF3_RAT ETS-related transcription factor Elf-3 OS=Rattus norvegicus OX=10116 GN=Elf3 PE=2 SV=1 && PF00178:Ets-domain|PF02198:Sterile alpha motif (SAM)/Pointed domain
Cg21273	0	1.0775	0.644692	8.13719	84.5079	- && - && PF15227:zinc finger of C3HC4-type, RING
Cg21282	9.64339	2.73662	7.41887	39.1774	126.809	- && sp|Q8IZU3|SYCP3_HUMAN Synaptonemal complex protein 3 OS=Homo sapiens OX=9606 GN=SYCP3 PE=1 SV=1 && PF04803:Cor1/Xlr/Xmr conserved region
Cg21286	0.0470733	0.0681425	0.168181	0	4.54308	- && sp|Q8TC57|M1AP_HUMAN Meiosis 1 arrest protein OS=Homo sapiens OX=9606 GN=M1AP PE=1 SV=1 && -
Cg21298	6.862	7.03422	4.71552	2.13848	7.55062	- && - && -
Cg21305	13.7082	36.7264	7.58607	9.27501	12.8643	- && - && PF00822:PMP-22/EMP/MP20/Claudin family
Cg21313	17.0871	48.2351	12.8074	5.06315	0.819585	- && - && PF00822:PMP-22/EMP/MP20/Claudin family
Cg21352	0.167748	0.612881	0.336597	1.41459	0.222734	- && - && -
Cg21363	0	0.0218499	0.0273894	2.11629	21.1718	- && sp|Q9UGI6|KCNN3_HUMAN Small conductance calcium-activated potassium channel protein 3 OS=Homo sapiens OX=9606 GN=KCNN3 PE=1 SV=2 && PF03530:Calcium-activated SK potassium channel|PF02888:Calmodulin binding domain|PF07885:Ion channel
Cg21366	1.18465	2.03739	0.544386	1.60795	0.783123	- && - && PF12736:Cell-cycle sustaining, positive selection,
Cg21381	1.86867	3.60192	1.46434	2.17383	3.47064	- && - && -
Cg21390	0.241588	0.0423285	0.372945	0.0503099	0.774431	- && - && -
Cg21394	2.67832	3.0169	3.74415	2.61498	5.31992	- && sp|O94782|UBP1_HUMAN Ubiquitin carboxyl-terminal hydrolase 1 OS=Homo sapiens OX=9606 GN=USP1 PE=1 SV=1 && PF00443:Ubiquitin carboxyl-terminal hydrolase
Cg21402	0.946919	1.06913	0.390033	1.27854	1.20836	- && sp|Q6P4U0|THS7B_MOUSE Thrombospondin type-1 domain-containing protein 7B OS=Mus musculus OX=10090 GN=Thsd7b PE=2 SV=1 && PF19028:Spondin-like TSP1 domain|PF19030:Thrombospondin type 1 domain
Cg21403	5.94693	19.98	9.2542	8.53419	12.1765	- && sp|Q99L13|3HIDH_MOUSE 3-hydroxyisobutyrate dehydrogenase, mitochondrial OS=Mus musculus OX=10090 GN=Hibadh PE=1 SV=1 && PF14833:NAD-binding of NADP-dependent 3-hydroxyisobutyrate dehydrogenase|PF03446:NAD binding domain of 6-phosphogluconate dehydrogenase
Cg21415	18.9312	44.794	21.5427	23.2177	11.3942	- && sp|P20009|DLL_DROME Homeotic protein distal-less OS=Drosophila melanogaster OX=7227 GN=Dll PE=2 SV=3 && PF00046:Homeodomain
Cg21429	35.4537	39.0569	85.123	24.1694	22.4738	- && sp|P24844|MYL9_HUMAN Myosin regulatory light polypeptide 9 OS=Homo sapiens OX=9606 GN=MYL9 PE=1 SV=4 && PF13499:EF-hand domain pair
Cg21436	13.394	6.74543	19.3166	11.7299	8.26928	- && sp|O77245|E75_METEN Nuclear hormone receptor E75 OS=Metapenaeus ensis OX=32278 GN=E75 PE=2 SV=1 && PF00105:Zinc finger, C4 type (two domains)|PF00104:Ligand-binding domain of nuclear hormone receptor
Cg21448	7.08142	11.9874	34.8019	2.38061	2.08325	- && sp|P42674|BP10_PARLI Blastula protease 10 OS=Paracentrotus lividus OX=7656 GN=BP10 PE=2 SV=1 && PF00629:MAM domain, meprin/A5/mu|PF00431:CUB domain|PF01400:Astacin (Peptidase family M12A)
Cg21453	13.3113	9.00786	20.2792	19.685	17.3039	- && - && -
Cg21457	0.0500638	0.707509	0.0187386	0.120021	0.0949348	- && sp|P50549|ETV1_HUMAN ETS translocation variant 1 OS=Homo sapiens OX=9606 GN=ETV1 PE=1 SV=2 && PF00178:Ets-domain|PF04621:PEA3 subfamily ETS-domain transcription factor N terminal domain
Cg21480	1.94729	5.4088	2.01912	0.688125	2.69999	- && - && -
Cg21489	214.789	53.9347	147.292	131.133	65.2849	- && sp|Q0P467|RNKA_DANRE Ribonuclease kappa-A OS=Danio rerio OX=7955 GN=rnaseka PE=3 SV=1 && -
Cg21503	0.0614982	0.175584	0.0159944	0.0463858	1.11554	- && - && -
Cg21524	0.329889	0.55573	0.157309	0.183373	0.330895	- && sp|Q99102|MUC4_HUMAN Mucin-4 OS=Homo sapiens OX=9606 GN=MUC4 PE=1 SV=4 && PF07645:Calcium-binding EGF domain|PF12947:EGF domain|PF00008:EGF-like domain|PF14670:Coagulation Factor Xa inhibitory site|PF12662:Complement Clr-like EGF-like
Cg21562	0	0.349886	0.0136427	0.42568	0.0733968	- && sp|P18293|ANPRA_MOUSE Atrial natriuretic peptide receptor 1 OS=Mus musculus OX=10090 GN=Npr1 PE=1 SV=2 && PF07714:Protein tyrosine and serine/threonine kinase|PF00211:Adenylate and Guanylate cyclase catalytic domain|PF01094:Receptor family ligand binding region
Cg21570	0	0.0273741	0	0	0.645985	- && sp|O60242|AGRB3_HUMAN Adhesion G protein-coupled receptor B3 OS=Homo sapiens OX=9606 GN=ADGRB3 PE=1 SV=2 && PF00090:Thrombospondin type 1 domain
Cg21590	14.8415	12.3497	29.0168	29.785	10.8096	- && - && -
Cg21599	0.456564	0.513469	0.382617	0.7937	16.021	- && - && -
Cg21600	1.06846	0.249555	1.46704	1.55824	8.99546	- && - && PF03104:DNA polymerase family B, exonuclease domain
Cg21624	5.8651	13.4831	4.04479	3.83011	4.12398	- && sp|H2A0L6|HEX_PINMG Putative beta-hexosaminidase OS=Margaritifera margaritifera OX=102329 PE=1 SV=1 && PF02838:Glycosyl hydrolase family 20, domain 2|PF03173:Putative carbohydrate binding domain|PF00728:Glycosyl hydrolase family 20, catalytic domain
Cg21656	13.0733	4.40896	10.8041	15.0379	12.8322	- && sp|Q0VCK5|AP2A2_BOVIN AP-2 complex subunit alpha-2 OS=Bos taurus OX=9913 GN=AP2A2 PE=1 SV=1 && PF02883:Adaptin C-terminal domain|PF01602:Adaptin N terminal region
Cg21662	160.552	102.736	271.035	130.99	129.935	- && sp|Q3UPW2|ELF3_MOUSE ETS-related transcription factor Elf-3 OS=Mus musculus OX=10090 GN=Elf3 PE=1 SV=1 && PF02198:Sterile alpha motif (SAM)/Pointed domain|PF00178:Ets-domain
Cg21692	0	0.0226999	0.208035	0.0647248	0.627999	- && sp|F1N9Y5|KSYK_CHICK Tyrosine-protein kinase SYK OS=Gallus gallus OX=9031 GN=SYK PE=1 SV=2 && PF07714:Protein tyrosine and serine/threonine kinase
Cg21700	0.351381	1.48155	0.932536	0.0913886	1.33606	- && - && -
Cg21703	4.35282	10.9986	3.59912	23.8939	31.6771	- && sp|Q6DCD1|FGGY_XENLA FGGY carbohydrate kinase domain-containing protein OS=Xenopus laevis OX=8355 GN=fggy PE=2 SV=2 && -
Cg21708	3.94453	2.36703	17.9337	0.18576	2.14091	- && - && -
Cg21711	1.11231	0.721679	3.83139	20.9557	13.5531	- && - && -
Cg21715	90.2807	6.73595	68.4539	22.0815	115.571	- && sp|Q66IC8|DYLT5_DANRE Dynein light chain Tctex-type 5 OS=Danio rerio OX=7955 GN=dynlt5 PE=2 SV=1 && PF03645:Tctex-1 family
Cg21717	91.6966	92.8086	69.7443	110.583	29.3578	- && sp|P30568|GSTA_PLEPL Glutathione S-transferase A OS=Pleuronectes platessa OX=8262 PE=2 SV=1 && PF02798:Glutathione S-transferase, N-terminal domain|PF00043:Glutathione S-transferase, C-terminal domain
Cg21723	3.26749	6.0221	2.86737	2.23008	2.23322	- && sp|Q8NFZ3|NLGNY_HUMAN Neuroligin-4, Y-linked OS=Homo sapiens OX=9606 GN=NLGN4Y PE=2 SV=1 && PF00135:Carboxylesterase family
Cg21744	12.0184	3.78351	10.3201	9.46027	7.91409	- && sp|Q96BD0|SO4A1_HUMAN Solute carrier organic anion transporter family member 4A1 OS=Homo sapiens OX=9606 GN=SLCO4A1 PE=1 SV=2 && PF03137:Organic Anion Transporter Polypeptide (OATP) family
Cg21747	2.3041	4.62518	1.44887	5.08921	4.70115	- && sp|P56931|E2F2_MOUSE Transcription factor E2F2 OS=Mus musculus OX=10090 GN=E2f2 PE=1 SV=2 && PF02319:E2F/DP family winged-helix DNA-binding domain|PF16421:E2F transcription factor CC-MB domain
Cg21751	0.305727	1.37675	0.286275	0.04583	0.0532247	- && - && -
Cg21754	0.227289	0.0591835	0.416937	0.16989	0.401332	- && sp|Q9VQH2|DUOX_DROME Dual oxidase OS=Drosophila melanogaster OX=7227 GN=Duox PE=1 SV=2 && PF08030:Ferric reductase NAD binding domain|PF03098:Animal haem peroxidase|PF01794:Ferric reductase like transmembrane component|PF08022:FAD-binding domain
Cg21771	0.330278	0.863019	0.559727	0.633656	0	- && - && PF00028:Cadherin domain
Cg21791	0.651992	0.696573	0.783363	0.0707734	1.04993	- && sp|P50219|MNX1_HUMAN Motor neuron and pancreas homeobox protein 1 OS=Homo sapiens OX=9606 GN=MNX1 PE=1 SV=3 && PF00046:Homeodomain
Cg21792	28.9005	11.6409	37.1347	25.4743	37.901	- && sp|Q18179|NPR11_CAEEL Putative neuropeptide Y receptor 11 OS=Caenorhabditis elegans OX=6239 GN=npr-11 PE=3 SV=2 && PF00001:7 transmembrane receptor (rhodopsin family)
Cg21812	8.64723	5.98577	11.7919	6.20747	5.82448	- && sp|Q23551|UNC22_CAEEL Twitchin OS=Caenorhabditis elegans OX=6239 GN=unc-22 PE=1 SV=3 && PF00041:Fibronectin type III domain|PF00069:Protein kinase domain|PF07679:Immunoglobulin I-set domain
Cg21846	17.6681	4.84829	14.646	6.65932	16.7455	- && - && PF00001:7 transmembrane receptor (rhodopsin family)
Cg21865	96.2983	66.8562	138.14	146.548	135.514	- && - && -
Cg21870	3.06799	0.693841	2.00482	2.22421	1.27639	- && sp|Q8NCJ5|SPRY3_HUMAN SPRY domain-containing protein 3 OS=Homo sapiens OX=9606 GN=SPRYD3 PE=1 SV=2 && PF00622:SPRY domain
Cg21879	3.32112	2.08145	3.99614	3.5841	9.63406	- && sp|Q07409|CNTN3_MOUSE Contactin-3 OS=Mus musculus OX=10090 GN=Cntn3 PE=1 SV=2 && PF13895:Immunoglobulin domain|PF07679:Immunoglobulin I-set domain
Cg21887	3.28297	2.40083	1.96878	1.72608	4.7129	- && sp|Q2HJ10|ZNT2_MOUSE Zinc transporter 2 OS=Mus musculus OX=10090 GN=Slc30a2 PE=1 SV=1 && PF01545:Cation efflux family
Cg21889	45.8036	32.2698	19.0445	7.17981	28.7179	- && - && -
Cg21890	0.0855599	0.390391	1.1919	0.00899852	0.52769	- && - && PF09588:YqaJ-like viral recombinase domain
Cg21909	149.833	453.564	115.463	158.824	96.8568	- && - && PF10195:DNA-binding nuclear phosphoprotein p8
Cg21914	3317.72	5161.35	3717.78	2257.54	5436.61	- && - && PF11901:Protein of unknown function (DUF3421)
Cg21915	567.958	705.406	588.129	312.738	903.675	- && - && PF11901:Protein of unknown function (DUF3421)
Cg21940	3.67997	5.7274	12.985	1.89102	1.68262	- && sp|Q10751|ACE_CHICK Angiotensin-converting enzyme (Fragment) OS=Gallus gallus OX=9031 GN=ACE PE=2 SV=1 && PF01401:Angiotensin-converting enzyme
Cg21943	1.91293	3.81927	1.05303	8.98193	10.3965	- && - && PF15478:Family of unknown function with LKAAEAR motif
Cg21949	0	0.0366335	0	1.9706	0	- && - && PF00069:Protein kinase domain
Cg21950	0.0562374	3.01258	0.31218	0.11464	0.0840103	- && - && -
Cg21953	36.827	16.44	32.2457	26.3908	27.8325	- && sp|A5PJN8|SF3A2_BOVIN Splicing factor 3A subunit 2 OS=Bos taurus OX=9913 GN=SF3A2 PE=2 SV=1 && PF16835:Pre-mRNA-splicing factor SF3a complex subunit 2 (Prp11)|PF12874:Zinc-finger of C2H2 type
Cg21954	7.46053	4.34632	21.925	13.7149	19.8522	- && sp|Q0VC65|ETV6_BOVIN Transcription factor ETV6 OS=Bos taurus OX=9913 GN=ETV6 PE=2 SV=1 && PF02198:Sterile alpha motif (SAM)/Pointed domain|PF00178:Ets-domain
Cg21955	0.317991	0.525087	0.03739	0.250722	0.396744	- && sp|B7Z0W9|OTOP_DROME Proton channel OtopLc OS=Drosophila melanogaster OX=7227 GN=OtopLc PE=3 SV=2 && PF03189:Otopetrin
Cg21958	5.36418	5.86138	1.03395	10.0041	5.5796	- && - && -
Cg21961	7.61408	3.86367	15.8428	8.65939	1.03494	- && - && -
Cg22001	3.12933	0.503293	6.00843	2.4493	5.27756	- && - && -
Cg22010	1.08104	5.18667	1.01049	0.587569	0.496262	- && sp|Q28J59|F221A_XENTR Protein FAM221A OS=Xenopus tropicalis OX=8364 GN=fam221a PE=2 SV=1 && PF14753:Protein FAM221A/B
[truncated: 1,499 more rows]
