# Supplementary material for: Transcriptome profiling combined with network analysis deepens the understanding of immune response mechanisms in blood of pacific oyster Crassostrea gigas infected by Vibrio alginolyticus
Source: Frontiers journal article supplement (doi:10.3389/fmars.2022.1017445), 2022-09-16
Supplement: Data_Sheet_3.XLSX [file Data_Sheet_3.XLSX]

## Sheet: Sheet1
geneID	B_0h	P_12h	V_12h	P_48h	V_48h
Cg00022	1.5512	2.53988	0.783693	1.61936	1.28047
Cg00048	4.96768	11.9405	2.75026	3.69121	6.65229
Cg00064	4.89429	3.43095	16.5637	7.206	10.6096
Cg00065	0.231898	0.100921	0.13698	0.0106853	0.232164
Cg00066	0.744368	0.192918	0.842258	0.574414	1.08646
Cg00085	0.0367656	0.088011	0.167196	0	0.270757
Cg00131	16.207	0.588176	18.1169	5.58407	4.17731
Cg00144	0.448775	1.02438	0.299214	0.0586517	0.955696
Cg00165	0.388428	0.290383	1.9112	0.590374	0.565496
Cg00170	0.674386	1.55691	0.346253	0.111675	0.698007
Cg00192	27.2882	27.8605	60.5012	13.1633	7.56198
Cg00193	5.83513	1.50505	5.2905	5.4298	3.86833
Cg00203	0.475657	0.107664	1.58393	0.70466	0.525571
Cg00222	4.24573	0.569763	0.50974	7.41349	2.06063
Cg00226	1.33118	7.4043	1.83483	2.95861	3.47263
Cg00229	2.52405	1.00381	2.64915	1.68334	2.03147
Cg00230	0.328251	0.159191	0.694972	0	0.834381
Cg00247	2.86535	1.35731	4.88825	0.73971	1.69388
Cg00248	0.962197	2.87598	0.360254	0.843047	0.407332
Cg00259	8.72345	9.53414	3.63066	0.277924	2.59178
Cg00263	2.56872	0.761401	2.25114	1.40503	2.86011
Cg00271	194.475	164.539	347.788	271.467	270.008
Cg00306	39.4821	13.0686	102.863	3.70594	10.1974
Cg00368	7.14302	7.11884	5.84521	0.256432	2.60413
Cg00373	2.88414	0.959147	2.62385	1.84408	2.10857
Cg00392	0.64302	0	0.0856737	1.73035	0.12011
Cg00499	0	0.0101084	0.196301	0.114996	0.0201048
Cg00532	1.77165	0	1.29342	0.0466028	0.490302
Cg00550	0.675629	2.28248	0.153084	0.773295	1.93062
Cg00646	0.250529	0.389879	0.151086	0.0235958	0.368299
Cg00752	1.95135	1.40915	0	1.04494	0.625408
Cg00756	0.00413868	0.104473	0.0049564	0.252837	0.0793264
Cg00771	0	0.584389	0	0	0.0645101
Cg00802	0.0643624	0	0.121636	0.267706	0.521697
Cg00807	3.64158	2.30487	0	0.603145	1.25787
Cg00928	0.217919	0	0.524074	0.0212019	0.0338821
Cg00959	1.51488	0.31576	1.49174	0.680484	1.00828
Cg00973	0.15443	0.830515	0.10509	0	0.214333
Cg00980	2.96296	1.07015	3.78287	2.50466	4.44641
Cg00985	42.1894	27.2447	189.207	61	87.6223
Cg00991	2.79279	4.37505	1.72745	0.834779	5.06242
Cg01018	24.4971	10.8189	24.8112	13.698	13.2038
Cg01035	2.4367	0.655877	2.26083	3.0878	1.98707
Cg01058	0.0811635	0	0.0763294	0.00345614	0.0589051
Cg01070	0.133285	0	0	2.15733	0
Cg01087	1.21829	0.133508	1.03452	0.766978	0.6835
Cg01090	15.0468	1.55218	7.5319	4.61548	4.27063
Cg01091	4.90755	0.64781	1.23495	5.30857	0.0891638
Cg01092	10.9486	6.06869	18.5392	13.9354	7.2419
Cg01100	10.2002	3.82409	24.8539	8.30429	22.4699
Cg01105	10.2512	7.05162	28.6302	11.8843	26.1665
Cg01110	0.727464	0.0538199	0.713359	0.0132201	1.44944
Cg01112	2.31856	0.926608	3.9854	0.827283	3.28514
Cg01122	0.0291047	1.4768	0.00711917	0.0230756	0
Cg01128	0.185039	0.0677583	0.221599	2.20369	0
Cg01139	9.83277	5.084	10.0364	9.30077	9.05641
Cg01159	5.15704	1.54265	4.19391	5.32763	7.1726
Cg01174	38.0872	22.6332	45.3071	54.907	39.9927
Cg01177	0	0	0	0.0555724	2.76368
Cg01179	7.52561	2.07962	6.42121	3.17126	5.96627
Cg01188	0.11217	0.447519	0.622164	0.0953144	0.877224
Cg01201	0.355427	0.0813711	0.209329	1.1465	0.0456279
Cg01202	0.148805	0.406847	0.049943	0.039099	0.13992
Cg01212	0.233194	2.24479	0.840971	31.5865	2.57922
Cg01239	1.94767	2.20856	0.244262	1.09087	0.686564
Cg01241	2.10235	1.77744	1.58271	0.206315	1.56278
Cg01248	0	0.114845	0.0407591	0.518235	0
Cg01252	0	4.46607	1.68247	2.9505	19.8793
Cg01253	0	0	0.105603	0	0.319798
Cg01259	13.2641	0.369074	7.3817	0.522888	1.47317
Cg01272	2.4909	1.56605	1.08432	0.0678914	6.5179
Cg01273	0.279982	0.0417227	0	0.756974	0.0062891
Cg01290	2.6824	1.36669	0.906059	7.95615	0
Cg01291	0.16204	1.32582	0	2.59131	0
Cg01294	1.86337	4.02138	0	13.9388	0.0709871
Cg01318	0.49932	0.234118	0.367489	0.603503	0.0127067
Cg01320	7.74811	14.3872	6.99369	7.59892	9.19741
Cg01336	1.07692	0	0.751437	0.407727	0.690973
Cg01363	340.582	0.512938	15.2842	100.566	0.0605145
Cg01450	1.00255	12.7701	0.386125	4.87439	3.45856
Cg01471	0.256821	0.202165	0.247189	0.119453	0.904324
Cg01481	8.42005	13.5616	18.5984	2.08148	9.03244
Cg01487	57.3667	2.08219	95.0243	46.3316	27.0972
Cg01502	0.755406	0.0307332	0.34891	0.593151	0.26672
Cg01516	1.92105	0.136879	1.88766	2.7086	0.785417
Cg01528	1.12148	0.979674	0.946879	1.26152	0.46357
Cg01534	0.899697	1.19063	0.0357955	0.425208	0.360699
Cg01540	5.00479	2.98744	5.57841	11.8389	2.5783
Cg01549	0.203676	0.105176	0	0.587329	0.0264047
Cg01567	0.509768	1.79175	0	0.943023	0.496226
Cg01577	1.0887	0.175042	0.0954108	9.12911	0.882531
Cg01599	0.418517	3.76998	0.0838348	0.111612	0
Cg01615	0.986454	2.99959	0.856093	0.500304	0.525515
Cg01622	0	0.0375832	0.959291	25.4845	1.6442
Cg01635	55.428	19.7025	4.69685	19.4494	16.1657
Cg01677	0.0244514	1.80088	0	0.0216846	0.0432075
Cg01703	0	0.120684	0	2.84787	0.0918781
Cg01714	4.17565	2.65625	1.12721	2.05704	0.0498004
Cg01742	0.119205	0.174505	0.231546	1.61116	0.0719842
Cg01792	0	4.51393	0.266036	0.950856	0
Cg01804	1.82077	0.120694	0.351215	0.0296469	7.30779
Cg01807	0.0445151	0.289937	0.0122803	0.419575	0.0414767
Cg01809	0	0.51483	0	3.10747	0
Cg01827	0.567386	2.17994	0.295844	0.33607	0.674325
Cg01840	1.54395	0.525363	3.51139	7.57859	9.32075
Cg01845	3.41272	3.54423	2.20631	0	3.37634
Cg01848	0.293341	0.588634	0.111616	0.536535	0
Cg01881	0.350239	0.140109	0.358756	0.00756942	0.335165
Cg01892	0.0647269	0.558675	0.0758771	0.016946	0.114972
Cg01914	1.3394	3.84758	0.874804	0.788148	1.59905
Cg01932	6.39743	0	0.72377	0	1.93262
Cg01956	0.0198888	0	0.506604	0	0
Cg02028	0.889215	3.16996	0.192546	3.04717	0.268269
Cg02056	0.325895	0.524849	0.0322485	0.616188	0.382756
Cg02142	0.547464	0.472723	0.253445	0.777845	0
Cg02147	1.57537	0.255395	1.1961	0.158117	2.88293
Cg02154	1.36419	0.793935	3.57102	0.767559	1.16558
Cg02171	2.6669	1.99884	0.764004	1.64924	5.61255
Cg02267	0.215133	0.220013	1.03723	0.14767	0.445
Cg02302	0.743326	1.21436	2.05981	1.6049	0.264428
Cg02332	4.84615	15.8987	9.14224	0.87205	6.59205
Cg02335	0	3.20858	0	0	0.447711
Cg02339	24.7908	34.2523	21.9278	7.23477	19.923
Cg02356	2.50488	1.59281	4.25336	2.97409	2.51138
Cg02371	2.83782	2.98647	0.0991106	0	2.50707
Cg02374	0.579848	1.2692	1.98596	0.310122	1.78874
Cg02435	0.321966	0.0582564	0.0748086	0.973227	0.188204
Cg02456	0.670522	0.648363	1.92951	0.373801	0.258502
Cg02466	0	0.0061079	0	0.422266	0.00293882
Cg02535	4.83543	1.60583	6.32536	3.35144	4.31082
Cg02538	0.55987	0	0	0	2.27928
Cg02570	1.58792	0.0213322	0.791293	0.839782	0.415108
Cg02591	0.121366	0.0546438	0.0136995	0.355276	0
Cg02611	0.624915	0.235749	0.0993604	0.0281075	0.44082
Cg02638	12.2909	15.6852	4.79941	2.01006	1.41484
Cg02655	0.877963	2.58439	5.94562	1.10182	0.829868
Cg02683	32.5919	21.2183	5.12518	13.0687	46.3799
Cg02684	0	0.214899	0.0479632	1.36912	0
Cg02685	0.0581273	0.787936	0.112928	1.49379	0.993416
Cg02698	11.2498	4.36485	5.15937	2.24344	9.03418
Cg02707	0.0879204	0.281865	0	1.19239	0.0306415
Cg02708	1.43154	1.39649	3.1658	3.31046	3.76055
Cg02712	0.0367554	0.0494822	0	1.00296	0.0556769
Cg02740	0.596258	1.72532	0.122234	0.340599	0.426911
Cg02745	0.220329	0.980162	0	0	0.168107
Cg02810	2.44661	5.62095	1.82003	0.318182	0.210057
Cg02827	263.01	156.102	104.155	114.832	24.5036
Cg02835	0.355262	0.180878	2.2276	0	1.62475
Cg02838	147.931	68.3121	74.8541	134.309	55.2347
Cg02881	2.24207	1.00069	2.17617	1.58073	1.55565
Cg02886	0.0640728	0.0426657	0.0487432	0.158538	0.00746057
Cg02898	1.4702	0.00991766	1.28016	0.446747	0.169564
Cg02908	2.51927	10.2582	4.21026	14.9013	1.53023
Cg02911	1.81861	1.21598	0.190091	0.189136	0.808283
Cg02975	0	0.15798	0.102961	0.0506686	0.837794
Cg02988	56.7607	24.8885	82.332	50.2975	15.7787
Cg03004	0.198592	0.201005	0.127635	0.197363	0.0203067
Cg03022	0.356621	0.429011	0.741027	1.86898	0.426277
Cg03040	0.033683	0.488178	0.0291702	0	0.0859249
Cg03062	2.73154	0.610171	1.65753	5.22929	0.599061
Cg03073	17.178	7.87269	1.44827	5.98286	7.84454
Cg03086	0	1.80082	0	0	0
Cg03116	0.0270939	0.538085	0.0466437	0.103572	0.0732425
Cg03121	0	0.0337341	0.028191	0.00711018	0.264623
Cg03149	0.0507932	0.888845	0.0497075	0	0.0585041
Cg03160	0	1.50071	0.101012	1.30597	0.660861
Cg03164	7.49756	6.04578	12.1794	6.07815	8.7028
Cg03173	3.05103	7.74163	8.1062	16.9381	4.03386
Cg03232	0	0	0	4.94164	0
Cg03269	28.7236	1.75579	12.6848	10.5984	0.0634974
Cg03278	0.351518	7.0113	2.92869	8.06532	1.00302
Cg03289	0	0.046669	0.0427316	0.12582	0
Cg03296	0	11.8988	0.426743	0.1009	6.45998
Cg03300	0.284167	0.152507	0.276474	0.08602	0.996982
Cg03301	0.895481	2.06906	1.12447	0.965086	4.98013
Cg03307	0	0	1.21445	0	0
Cg03368	24.2815	2.12954	7.57168	20.0202	18.4207
Cg03370	4.02371	1.61583	4.28563	3.80314	7.02902
Cg03371	1.27841	0.435585	2.59775	0.785145	2.70398
Cg03380	7.18774	2.36299	5.71498	3.6274	9.9156
Cg03383	0.61178	0.660869	0	11.8051	0
Cg03384	0	1.49437	0	0	0.351077
Cg03390	2.54557	0	2.18472	3.13542	5.58449
Cg03438	37.461	23.6052	47.0202	25.159	24.9464
Cg03454	0.221049	0.151771	1.35245	0.0275359	0.82099
Cg03478	0	0	0.443027	0.386856	0
Cg03488	3.37423	1.48192	3.48584	1.8538	3.7353
Cg03494	0	0	0.0812736	7.17046	0.15215
Cg03496	22.7033	5.08759	35.3221	25.7883	7.67794
Cg03500	64.9596	121.856	57.1072	166.788	164.776
Cg03521	58.6405	50.0135	98.1398	89.9162	65.0917
Cg03533	224.043	62.3978	171.047	132.619	85.2196
Cg03537	3.99338	0.868332	0.0636704	0.59345	0.465278
Cg03574	0	0.621434	0	0.796887	0.16598
Cg03579	1.0925	0.616232	3.06719	1.05023	4.08877
Cg03585	55.2039	36.4719	93.0388	75.6358	108.583
Cg03605	0	0.416492	0	0	0
Cg03607	0.733695	1.65403	0.238323	0.526741	1.00031
Cg03610	4.05585	4.824	25.3694	1.81935	2.72026
Cg03620	3.00852	5.14213	4.18195	1.3504	4.16009
Cg03623	0.0964952	0.0170571	1.11471	1.57235	0.349342
Cg03643	0	0.744727	0	0	0.180192
Cg03647	4.04719	9.62547	4.46948	4.74815	2.05552
Cg03663	2.36209	3.14727	3.2058	9.55326	2.39325
Cg03677	2.18107	2.42539	47.0065	32.8764	1.97508
Cg03678	8.03429	3.93445	14.8114	15.4481	56.6454
Cg03692	0.0436986	0.0386222	0.0427557	1.00283	0.0197753
Cg03720	0.455713	15.1628	1.63668	0.336569	0.260575
Cg03733	2.36465	2.28876	2.76024	0.0211494	0.914095
Cg03745	119.217	60.6825	129.901	82.3765	62.8327
Cg03768	2.80778	0.787017	2.03292	1.62563	2.12726
Cg03793	0.549349	7.328	1.12483	1.93037	1.39863
Cg03804	254.207	34.2242	123.696	99.1344	64.9559
Cg03812	361.811	243.342	584.855	245.355	338.522
Cg03814	95.7187	53.6537	165.52	89.6974	119.036
Cg03815	0.376392	0.995172	0.396155	0.492579	0.556198
Cg03825	0.603922	1.22849	0.336862	0.432403	0.865249
Cg03828	0	0	0	0.512951	0
Cg03856	87.2133	15.0616	29.9238	16.1189	8.6621
Cg03861	4.76118	0.857281	1.96594	0	1.20748
Cg03879	10.4251	3.32647	12.2694	11.2054	4.8809
Cg03880	5.06054	3.20436	3.70184	1.91106	4.90172
Cg03906	0.0494644	0.0662938	0	0.610162	0.0159157
Cg03909	7.5791	10.9832	2.90301	3.43823	3.18557
Cg03921	4.43424	9.89899	4.5363	5.85534	4.63948
Cg03950	0.0291919	0.0137585	0.935263	0.151189	0.0140892
Cg03962	193.315	127.803	276.449	174.569	125.067
Cg03965	0.589844	1.13006	4.00881	3.63617	0.416649
Cg03971	21.5859	8.9124	21.1773	32.0063	39.8577
Cg03972	0	0	0	1.83478	17.61
Cg03974	0.0450943	0.0232243	0.0441214	1.32482	20.5492
Cg03975	0.00460886	0.0122204	0.020035	0.00300177	0.109982
Cg03980	10.2796	15.2454	5.43227	10.7195	10.4626
Cg03983	3.10906	1.84338	0.394444	1.12668	4.27152
Cg03984	2.26727	6.60354	1.64819	4.56012	3.00841
Cg03989	16.4957	41.9313	15.9956	5.56036	20.7527
Cg03996	6.89098	9.04324	2.68179	3.52981	4.33148
Cg04001	46.6495	90.4413	35.3267	59.0046	52.6805
Cg04019	137.789	94.6484	110.178	105.462	37.2096
Cg04024	1.95501	5.9523	1.9094	5.47356	6.10688
Cg04034	0.0400642	0.431699	0	0	0
Cg04038	1.25989	0.244245	0.532525	0	3.43384
Cg04044	0.078369	0.148047	0.218488	12.814	116.373
Cg04049	0.139956	0.220388	2.02479	0.147972	0.303892
Cg04052	13.1486	10.7088	34.5366	19.9191	8.90326
Cg04071	2.93286	1.01799	2.95024	8.30182	1.33196
Cg04075	4.8887	2.10346	16.1574	10.5606	29.4235
Cg04077	2.77405	1.77362	7.67797	20.139	8.81759
Cg04164	0.607442	1.44048	0.701561	2.83304	0.48365
Cg04166	9.81332	2.59547	6.81795	6.51725	5.98519
Cg04173	4.44493	9.00699	6.72852	9.99664	4.02566
Cg04176	20.014	2.18701	6.08956	8.79914	7.51682
Cg04178	8.01784	11.3178	12.3687	21.7378	46.4221
Cg04218	0.00719064	0	0.17682	0	0.00650808
Cg04220	11.2903	9.10356	24.3987	13.5652	17.3552
Cg04221	2.58955	2.17924	6.22107	3.60988	2.45176
Cg04222	17.2581	14.7024	30.3178	20.5951	24.1336
Cg04223	2.11241	0.696402	2.12073	2.46407	3.78245
Cg04228	0.311843	4.13809	0.547493	0.0794688	0
Cg04229	0	0.900984	0	0.119131	0
Cg04256	8.48831	14.0165	5.4949	17.7267	18.6406
Cg04261	5.50355	3.36905	9.48576	6.41901	5.31406
Cg04268	13.097	5.20735	10.7819	7.77022	9.7564
Cg04284	0.815072	1.32781	0.455485	0.910037	0.680787
Cg04289	1.14011	2.68257	0.532261	0.560738	1.26441
Cg04299	3.65558	6.53297	2.11947	4.15083	6.49822
Cg04306	34.0588	17.3263	58.2365	24.9132	21.0686
Cg04309	5.83637	9.12685	3.7723	7.12971	2.29598
Cg04314	21.5717	10.1846	24.2369	14.0476	7.68885
Cg04323	12.6923	5.3091	11.4874	10.9143	16.2697
Cg04327	3166.05	2198.33	5826.5	554.692	1713.27
Cg04328	6616.71	6590.02	13674.5	1433.59	3979.34
Cg04337	0.0265191	0.189582	0	0.271351	0
Cg04339	5.14302	1.41494	3.38786	7.622	8.31392
Cg04340	2.4438	1.49127	5.35263	1.12885	1.37082
Cg04374	0	0	3.10167	0.108678	0.49212
Cg04386	0	0.0483641	0.0588102	1.12394	0.0862585
Cg04387	2.06828	2.62934	0.199697	1.65045	2.42988
Cg04399	97.9461	80.7071	164.556	69.4378	59.8781
Cg04402	2.11366	0.835144	2.44192	1.72537	1.48853
Cg04410	3.7009	1.46851	4.03055	4.31549	4.07182
Cg04415	2.16806	6.4475	2.88166	1.48096	2.2635
Cg04436	10.2424	3.18168	6.71668	5.13383	5.01834
Cg04441	0	0.185351	0.175938	1.21632	9.26732
Cg04451	7.31341	12.6803	6.02123	9.13671	12.0465
Cg04452	0	0.00555944	0	0.26822	4.63292
Cg04460	55.8102	108.354	39.281	7.32609	19.0097
Cg04470	13.3296	13.1529	5.64647	11.1678	17.3321
Cg04472	0.14655	1.03057	0.186289	0.643923	0.510232
Cg04473	0.947888	6.48677	0.693568	3.22824	2.63794
Cg04481	27.1702	0.72459	8.15113	15.2144	9.79568
Cg04495	0.1485	0.0792945	0.199868	0.765357	0.0361192
Cg04510	3.32663	4.44087	1.35816	1.36843	2.9698
Cg04517	0	0.0818543	0.0332016	6.91796	76.5328
Cg04519	8.63807	3.68259	7.51776	5.7688	5.05023
Cg04525	0.777808	0.566059	0	0	1.57585
Cg04533	18.5381	14.263	66.4334	22.6999	12.5465
Cg04549	0.917289	1.02488	0.206523	0.369738	0.421574
Cg04553	2.43138	1.68161	0.157742	0.2004	0.191926
Cg04557	0.443408	1.02181	0.450284	0.273735	1.62575
Cg04563	7.55324	7.20771	6.35795	5.92059	15.7094
Cg04581	152.59	46.4747	41.796	273.582	109.306
Cg04582	0	2.41653	0.291142	0.475163	1.21397
Cg04583	5.24298	15.8888	6.77788	17.8333	27.6994
Cg04588	0.402509	8.2413	0.671914	1.27152	3.16007
Cg04615	2.24059	0.23612	0.757246	7.1589	0.608037
Cg04628	32.1997	6.66578	17.1818	6.67944	7.01774
Cg04639	7.42195	29.5295	9.80749	32.6287	22.426
Cg04645	0.138517	0.627189	0.0912313	0.256283	0.690903
Cg04656	0.200973	0.796215	0.762501	3.33701	18.8339
Cg04657	23.9452	17.1832	33.812	13.2655	15.2401
Cg04687	0.869994	0.856589	0.451607	0.613196	0.0218285
Cg04691	1.22083	1.31506	0.453841	0.981243	0.593468
Cg04727	6.76179	16.1734	6.25926	48.0204	43.9507
Cg04755	0.416724	0.540092	0.0855694	0.335405	0.929288
Cg04770	3.6188	4.25382	1.15708	1.03318	1.60159
Cg04779	3.21241	1.42427	3.72416	2.47924	9.27307
Cg04785	35.9832	18.2723	38.7684	21.238	34.823
Cg04790	0	0.13115	0	0.617229	0
Cg04791	0	0.228896	0	0.0302778	0
Cg04821	28.1651	7.50049	15.2167	16.4399	8.47346
Cg04830	0.262075	0.384464	0.531252	0.158474	1.62683
Cg04837	1.35107	2.2793	0.436088	2.26865	1.20975
Cg04840	4.65253	4.67453	2.89577	1.71389	6.63016
Cg04849	5.01076	7.20125	2.80831	4.67322	2.60048
Cg04860	0	0.411209	1.51651	0.17962	2.49855
Cg04872	8.1856	7.79731	8.02051	6.15816	12.3159
Cg04874	2.93724	1.68689	2.3924	2.12612	19.5236
Cg04894	1.88665	3.40691	1.09364	1.99372	0
Cg04902	3.10774	8.53587	3.1943	1.9873	0.686124
Cg04903	88.8171	24.946	72.435	98.5649	79.9797
Cg04908	0.159229	0.208731	0.652395	0.0595051	3.7406
Cg04914	1.04699	0.97094	1.7549	0.15005	1.35436
Cg04922	6.46847	3.44528	7.77685	9.25572	10.4882
Cg04932	21.3072	14.9093	32.7125	16.8563	19.8313
Cg04937	0.541473	0.681502	0.0335347	0.301705	0.455602
Cg04938	0.167772	0	0.235299	0.0277475	0.639581
Cg04945	0.346157	0.157281	0.152693	0.0388507	0.384255
Cg04959	5.36684	10.7132	4.41249	1.90885	2.53695
Cg04968	2.5289	4.54502	1.05491	0.681153	1.69995
Cg04971	0.684458	2.55886	0.928449	3.24766	2.78209
Cg04985	1.96234	1.55062	4.70279	2.87564	2.75038
Cg04987	12.9703	0.779479	12.4537	7.42752	1.76348
Cg04988	8.5745	1.81773	20.2107	26.2401	69.7862
Cg04989	1.39031	0.434387	3.80731	3.85324	2.61679
Cg05005	0.343811	2.95431	0.281142	0.287012	0.0598023
Cg05012	0	0.0628895	0.342793	0.542864	0
Cg05032	5.20077	6.78535	7.20293	7.81583	3.14517
Cg05033	2.78742	6.23031	1.79719	8.18507	6.51348
Cg05058	0.858681	0.897213	8.71867	0.557529	0.222242
Cg05062	1.46014	3.16235	1.09267	0.864562	1.41217
Cg05068	18.9745	41.5724	14.2982	140.738	76.0225
Cg05083	4.144	3.74605	13.2976	6.34513	4.04948
Cg05085	0.819015	0.899527	2.75882	3.45521	0.719773
Cg05086	18.5484	13.3414	20.6652	18.3672	4.53379
Cg05095	60.5172	33.2117	69.8048	30.0708	27.1284
Cg05099	2.01359	0.862596	0.265842	1.05306	2.0464
Cg05101	0.186652	0.494881	0.29428	0.0272212	0.495122
Cg05124	6.0341	7.2066	1.66394	3.77726	2.06075
Cg05126	358.815	286.289	568.358	326.224	261.116
Cg05140	5.77933	8.82208	4.2091	5.60379	3.44162
Cg05141	10.1523	5.68775	15.3728	12.6021	8.4897
Cg05143	0.876302	4.03499	2.03302	5.63947	1.36702
Cg05150	0.0434974	0.0235751	0.161857	0.0829107	0.459904
Cg05153	113.031	43.3107	179.225	41.6946	81.0916
Cg05154	4.4412	3.29842	8.27475	4.38897	6.05594
Cg05157	62.423	26.0644	63.1245	42.4819	53.99
Cg05166	19.8621	15.1874	33.4486	23.7013	47.8727
Cg05167	10.1854	11.4294	4.33238	11.4723	14.0955
Cg05190	37.1882	29.3053	117.494	46.7914	103.155
Cg05202	0.207527	1.0541	0.07167	0.0103927	0.0530737
Cg05203	0.341803	0.648823	0	0.361003	0.321591
Cg05217	3.69637	5.02608	1.50875	0.420777	4.19399
Cg05219	2.44905	3.67522	1.0451	3.31852	2.68418
Cg05222	46.4533	21.1733	39.5409	22.9376	6.97067
Cg05241	2.22066	3.61829	1.65241	5.17329	8.82689
Cg05272	1.05439	1.48401	3.59515	1.08541	1.69026
Cg05285	17.4149	26.0332	8.23576	4.02996	6.80233
Cg05299	22.8374	13.7876	50.3998	19.9397	11.7166
Cg05309	4.72633	1.26889	3.66113	2.77428	1.97776
Cg05326	0.153458	0.498051	0.284034	0.0315399	0.485561
Cg05378	0.738865	1.9527	0.355617	2.24925	0.993494
Cg05386	32.6037	13.4658	28.6057	16.3946	32.2234
Cg05397	0.532527	1.17818	0.442347	1.19828	0.215638
Cg05406	175.207	96.1977	197.269	223.523	186.388
Cg05410	6.37652	1.29065	3.07108	2.20448	2.24434
Cg05415	1.82155	2.43247	2.06202	1.20441	3.04924
Cg05421	153.413	180.147	83.0501	92.1601	93.5516
Cg05422	14.7043	6.72696	26.0569	13.0157	17.7784
Cg05428	0.0363506	0.10795	0.0408174	0.396754	0
Cg05440	2.25352	3.11839	0.504431	110.934	139.7
Cg05447	1.5996	1.77822	0.697951	1.79175	1.16913
Cg05505	10.5878	4.95733	11.9051	10.7072	10.9415
Cg05536	5.0865	1.3424	4.15319	4.53951	4.02784
Cg05537	14.6056	7.06968	16.2154	11.2968	7.42947
Cg05538	3.76863	4.55982	1.95769	3.64739	3.19132
Cg05540	20.1906	36.7784	15.0938	9.54218	17.0227
Cg05543	2.65693	5.86813	1.70867	2.40625	3.1034
Cg05568	1.4088	9.44662	2.1588	17.6937	351.492
Cg05570	4.48583	3.25295	6.77058	5.00013	7.77864
Cg05576	0.587752	0.599626	0.213102	1.23803	0.208935
Cg05597	0.0416321	0.09371	0.172278	0.0632577	0.290461
Cg05608	11.8604	5.62789	11.4949	8.90474	8.29857
Cg05614	4.2955	5.36551	13.0028	3.59168	5.20765
Cg05626	37.1292	6.46744	19.8529	28.0568	17.7714
Cg05627	8.94047	5.72379	13.834	9.97874	14.3993
Cg05662	4.27766	0.51526	2.04094	0.87667	4.65881
Cg05663	6.87962	3.52674	10.6695	3.28613	2.31159
Cg05667	7.90965	12.067	4.46114	5.48365	4.67963
Cg05669	0.386312	1.42999	0.478091	0.304097	0.864435
Cg05673	2.06257	3.30823	1.56201	1.89869	2.2301
Cg05680	3.76649	1.76418	6.54182	3.76017	2.34682
Cg05684	6.05735	2.58841	3.27255	5.26167	1.77127
Cg05690	1.10525	0.550197	0.968179	0.0442727	6.07845
Cg05691	147.709	54.809	136.95	85.26	26.6918
Cg05695	1.64856	2.16303	1.09426	0.245592	1.76463
Cg05700	1.59439	2.16356	2.12128	0.871272	4.99847
Cg05702	1.75595	5.48841	2.20497	4.86563	3.54543
Cg05710	0	0	0	0	0.586493
Cg05712	0.367465	0.88622	0.195616	0.0248348	0.226324
Cg05720	66.0423	45.1442	38.4309	27.9066	56.5923
Cg05722	1.92312	4.10707	1.66312	5.27844	6.13256
Cg05723	2.58817	0.471512	1.38408	4.00221	3.4024
Cg05730	3.97251	12.9187	4.03885	20.0731	46.1792
Cg05733	1.27933	2.93463	0.147372	1.2206	0.545119
Cg05737	6.91506	9.30379	3.63235	1.89672	2.04298
Cg05739	5.70558	20.0888	4.75225	13.1561	6.53548
Cg05759	0.445167	0.372894	1.63149	0.465116	0.446116
Cg05765	1.7427	4.09238	1.30577	1.50366	1.55439
Cg05767	16.3104	44.8504	17.8843	28.6181	22.566
Cg05820	1.74022	3.16673	3.17473	4.73176	1.6805
Cg05830	53.6785	18.1416	38.7081	24.8779	23.2884
Cg05836	0.526462	0.517506	0.248465	3.28159	19.8907
Cg05841	0.0185281	0.0603472	0	0.796592	23.2181
Cg05846	1.72834	1.3367	0.226015	1.86447	0.746964
Cg05847	0.548519	1.647	8.60911	2.40883	1.62825
Cg05856	4.71713	3.29323	2.20502	0.860944	4.95569
Cg05857	9.62385	4.6778	9.74459	7.26513	7.23669
Cg05862	2.13321	0.477466	2.16559	1.62634	2.08741
Cg05903	7.32848	13.0294	5.06325	36.8077	32.0388
Cg05906	36.8535	13.9563	32.2596	27.7203	35.778
Cg05922	24.204	51.7764	16.2564	42.0598	38.6283
Cg05926	5.88136	15.4283	7.27002	6.87685	8.53084
Cg05927	0.874559	1.70125	0.423924	1.16751	2.95283
Cg05941	76.5154	113.677	27.0094	40.0989	56.1778
Cg05957	6.41892	8.70178	11.6977	2.41779	10.9234
Cg05968	17.3162	12.8533	8.38446	5.6371	17.226
Cg05982	2.43344	3.99698	0.913493	1.2958	0.986625
Cg06020	27.6888	4.99352	39.8371	22.6404	32.5008
Cg06021	1.53869	0.879968	0.0790776	0.494347	0.622946
Cg06025	1.13742	0.459268	0.674598	0.943593	3.56593
Cg06034	0.0154412	1.86637	0.704628	2.39651	14.6128
Cg06048	3.21109	0.849041	3.02389	2.75383	3.61376
Cg06051	37.5363	11.4388	25.7568	31.1582	34.1732
Cg06066	0.908793	2.59739	0.919413	0.586776	2.12434
Cg06098	28.2346	41.9658	11.8545	30.8941	22.7328
Cg06107	0	0.29547	0.0163546	0	0.304644
Cg06129	21.6375	13.5881	26.5881	19.4622	23.7289
Cg06132	2.87614	4.40414	1.74736	10.767	11.527
Cg06149	4.02655	1.84312	2.05236	5.86205	1.75157
Cg06150	48.2964	86.3108	40.8466	246.968	279.945
Cg06171	0.135566	0.905722	0.553999	2.19234	0.580945
Cg06174	0.0471325	2.33212	0.303984	0.447464	0.499934
Cg06178	5.09777	7.87295	1.84211	2.08258	1.75227
Cg06182	1.13978	0.404448	2.87205	0.496188	0.191235
Cg06186	350.917	539.989	143.386	48.5454	30.9739
Cg06208	5.36733	15.4026	4.34622	1.58341	1.79691
Cg06221	4.34891	3.22185	30.643	4.67914	4.44914
Cg06226	4.43566	2.75455	7.93573	1.18785	2.03318
Cg06227	0	0.0890616	0.0807361	1.66957	12.3872
Cg06248	0.931399	1.89244	1.18494	0.734159	2.56777
Cg06261	8.90893	4.4083	9.83708	2.14286	1.22045
Cg06267	0.313727	0.974922	0.197401	0.814967	0.46802
Cg06289	15.0921	45.5777	21.4968	40.7852	9.19788
Cg06290	0.139539	1.55889	0	0	0.216292
Cg06292	11.6297	19.9487	11.5415	20.5277	4.90534
Cg06301	0.499136	1.95148	0.62384	0.736104	4.35121
Cg06304	30.5359	27.5111	55.8491	56.0524	98.8645
Cg06311	13.0627	23.2602	9.47015	2.98469	3.14129
Cg06313	26.2192	44.9497	17.8486	32.4361	19.3995
Cg06355	337.712	119.56	364.734	144.492	213.287
Cg06368	20.6742	24.9971	78.3443	31.3759	9.42281
Cg06374	0	0	0.60739	1.92248	0.119463
Cg06385	6.86334	4.71397	9.58065	5.61926	9.82156
Cg06400	4.05062	2.28724	8.59824	4.23769	3.17402
Cg06403	6.43219	9.79575	3.14307	9.55455	12.8012
Cg06404	0	0.0421114	0	0	9.88492
Cg06442	51.7309	97.3645	52.4215	160.029	435.941
Cg06444	392.123	504.53	227.7	475.767	1265.7
Cg06453	0.0379936	0	0	0.579786	0
Cg06473	2.68217	8.73125	4.09488	2.5577	8.01564
Cg06491	0.142368	0.581505	0.368158	1.115	18.0906
Cg06493	0.104839	0	0.46413	0.155136	0.364179
Cg06496	0.587882	0.239183	0.659581	0.200646	1.85121
Cg06497	1.25596	0.682037	0.388354	0.336419	2.40842
Cg06499	32.7816	27.5877	145.997	163.326	205.629
Cg06504	7.81863	16.1505	15.7493	7.40233	21.1907
Cg06506	1.09829	3.60515	0.265146	0.317567	1.18339
Cg06517	3.03135	4.67607	1.96055	5.51541	4.21392
Cg06574	4.55085	8.64975	3.65164	6.44322	4.28103
Cg06614	20.2959	22.9039	51.6511	13.7699	6.31753
Cg06623	2.31765	1.20824	3.06754	1.52753	1.18518
Cg06645	0.660439	0.366555	0.518331	0.943048	2.83089
Cg06648	54.4462	21.4364	85.9528	35.6823	32.4235
Cg06649	0.114365	0	0.0314289	0.186452	0
Cg06708	0.21286	0	0.50816	0.0668982	0.064799
Cg06737	18.4665	27.7273	35.3324	28.5418	71.5153
Cg06752	25.7873	21.7563	5.86694	6.4595	19.2024
Cg06755	5.01335	7.41211	2.6828	2.08513	3.54551
Cg06764	6.7639	6.31393	12.494	4.58721	3.05415
Cg06767	1.25694	2.73807	0.97379	1.78095	2.59807
Cg06771	10.409	4.91712	18.39	14.1256	19.193
Cg06775	0.61538	0.493467	0.220126	1.06661	0.0212148
Cg06780	14.1248	6.06607	13.7135	4.48292	4.41944
Cg06786	5.94649	5.4322	12.121	7.71419	11.0329
Cg06787	0.712279	3.08175	0.635798	0.970149	0.722206
Cg06788	9.04904	2.4331	6.48187	7.80643	6.9991
Cg06804	0.430994	0.221819	0.813378	0.0588272	0.508556
Cg06807	7.61705	3.39379	10.7491	8.0499	8.10412
Cg06837	0.89384	1.01884	0.414992	1.82235	2.06179
Cg06855	393.345	210.873	452.952	270.784	235.52
Cg06877	1.28778	0.647412	0.629139	0.0433338	0.910427
Cg06895	1.86979	1.72517	6.95823	0.0832425	0.212477
Cg06897	0.409755	0.0367831	0.327123	0.761486	0
Cg06901	0.21036	1.28933	0.164061	1.33841	0.811137
Cg06903	0.323215	0	1.21145	0.243651	3.06499
Cg06921	0.414424	0.172466	0.135507	0.0146437	0.275495
Cg06942	10.9378	26.6142	9.05166	32.0414	24.2625
Cg06943	8.14164	3.65512	8.11015	10.2357	10.5654
Cg06950	11.1649	9.64187	18.8605	9.8217	11.935
Cg06961	29.6387	5.50937	14.6628	20.1748	17.8018
Cg06974	6.68305	3.04945	6.17821	5.31513	4.63815
Cg06986	104.826	43.2267	117.38	81.8815	107.607
Cg06987	1.28731	1.96382	5.50353	6.85243	0.539827
Cg06988	0.876102	2.89511	4.63565	18.7062	1.71231
Cg07012	0.11326	1.25488	0.123111	0.62791	0.236853
Cg07013	0.793495	0.0807163	1.13783	1.71976	0.771473
Cg07037	2.28177	0.498937	1.87393	0.685634	0.871406
Cg07048	0	0.642101	0	0.112942	0.376475
Cg07067	1.49561	0.146075	5.83264	0.622708	0
Cg07079	35.8366	19.708	45.7393	26.8489	11.7378
Cg07088	14.1282	3.30052	8.81862	11.3221	10.9248
Cg07099	1.26152	4.68837	1.54648	4.91665	5.23579
Cg07101	5.48502	4.52363	5.28674	3.51165	9.40603
Cg07105	1.20189	0.300365	2.38114	2.09631	1.11281
Cg07122	1.48351	0.452326	2.596	1.38948	4.4735
Cg07125	0.445698	2.41499	0.375438	0	0.632804
Cg07128	6.75356	4.00032	4.64105	2.89794	9.52977
Cg07129	17.579	35.7317	14.2616	34.9903	33.0161
Cg07130	28.214	4.92779	15.4038	32.8978	24.6757
Cg07133	8.72372	5.91671	16.6507	0.311502	0.689984
Cg07139	22.161	10.5841	21.412	13.7457	21.4932
Cg07140	14.9723	17.1965	19.8776	5.95888	12.417
Cg07150	7.09692	3.98892	9.50419	5.82246	7.16677
Cg07168	21.0705	44.2177	104.634	40.476	17.8631
Cg07174	0	0.126157	0.437848	0.29914	6.66617
Cg07180	66.4828	27.6115	101.028	56.4343	65.4137
Cg07187	8.59289	3.92811	16.5627	5.24223	3.07293
Cg07188	2.1913	0.956763	0.480695	0.126735	1.5338
Cg07190	2.46369	2.73931	8.15049	2.41331	1.79843
Cg07191	3.7013	0.990687	5.37325	4.11486	1.51896
Cg07205	25.8375	36.9453	92.3224	30.0223	37.9297
Cg07221	0.639937	5.83906	0.924487	0	0.249051
Cg07226	20.487	26.7656	11.1044	8.8105	13.6836
Cg07246	1.00926	0.417394	0.585381	1.46394	0.200789
Cg07269	1.23694	0.388029	1.24371	1.5754	1.39222
Cg07280	1.93751	12.7584	0.586926	6.66447	1.70761
Cg07283	0	1.83841	0.0761938	0.686654	0.199493
Cg07290	16.4071	5.11988	14.5727	24.7893	18.4529
Cg07294	7.15459	4.65853	1.19591	5.33036	7.46781
Cg07298	0.966643	0.193182	0.234257	0	1.06323
Cg07305	0	0.238096	0	0	0.0154269
Cg07322	1.90524	1.06862	0.449416	4.23015	0.975297
Cg07325	2.09047	2.68969	3.12781	5.45681	1.17917
Cg07327	0.390142	1.09327	0.190973	0.0123466	0.275666
Cg07353	8.00441	9.62828	12.1229	7.23016	19.4458
Cg07370	0.291324	1.2416	0	0	0.052734
Cg07409	0.512224	0.0920213	1.24193	0.326382	5.65744
Cg07433	0	0.112164	0.0839931	0.0112749	0.276987
Cg07447	0.338446	0.199874	0.104827	0	0.635569
Cg07448	0.338436	0.323954	2.34024	0.337892	0.801224
Cg07466	0.0624107	0.171619	0.00784714	0	0
Cg07488	58.692	98.2747	29.1421	49.8725	21.0152
Cg07489	90.6259	40.2943	8.41761	29.9531	5.29289
Cg07491	112.896	86.7782	21.1956	41.0664	134.941
Cg07494	0	0	0.524625	0.346774	0.0303075
Cg07496	0.476086	0.0530109	1.07758	0	3.27283
Cg07509	15.7487	6.63553	35.4001	11.5066	12.8336
Cg07516	18.6932	9.32023	18.601	17.3023	25.6861
Cg07519	429.688	143.106	171.59	180.173	49.2607
Cg07522	3.99206	2.22942	0.532369	19.6284	4.75316
Cg07535	660.461	382.579	1151.17	275.604	414.722
Cg07536	70.5962	29.6285	187.728	32.9934	9.24658
Cg07537	0.185143	0.134005	5.07595	0.180316	0.137226
Cg07589	5.97906	4.70071	11.4285	3.81687	2.50414
Cg07598	0.0225749	0.0731339	0.014574	0.963053	0.0250288
Cg07638	7.43594	15.85	4.10749	11.0382	8.20242
Cg07649	1.0708	2.4017	0.348375	1.50107	1.65901
Cg07664	1.24689	0.495361	2.0585	1.15271	0.950688
Cg07681	0.661516	2.61765	0.0270889	1.40583	2.33001
Cg07682	0.201657	0.0866045	0.720001	0.0951434	0.151696
Cg07691	0.31881	1.33634	0.03252	0.720813	0.364731
Cg07709	0.222766	1.38588	0.0871719	0	0
Cg07733	0.958178	0.712088	4.965	0.228125	0.20105
Cg07752	5.3003	6.0079	1.82191	0.522653	1.74891
Cg07754	7.43387	0.429136	4.86313	2.06617	1.92257
Cg07756	19.1658	14.0423	5.52612	6.56074	11.2416
Cg07763	35.436	76.3074	179.571	80.6781	14.2207
Cg07766	183.512	244.648	610.555	191.651	810.598
Cg07771	70.6433	5.95439	27.8891	7.9825	9.18653
Cg07773	0.792634	0.603664	1.65046	1.14042	0.0300344
Cg07786	1.11038	1.38908	0.641166	1.38031	0.342359
Cg07805	171.669	19.9254	65.6209	158.253	20.6872
Cg07830	0.174376	0.532272	0.167044	0.394049	0
Cg07834	0.50853	0.0958707	0.543259	0.0506778	3.32813
Cg07867	10.9533	0.04938	3.60768	0.177187	9.13667
Cg07897	112.321	26.3541	57.2707	28.9587	36.8673
Cg07898	94.296	42.0345	92.6198	40.1017	33.2667
Cg07899	3.6649	1.60781	3.68905	2.1571	2.04243
Cg07910	0.594068	0.54451	2.56606	0.809543	0.286344
Cg07911	0.982432	0.40219	2.13452	1.49876	0.715522
Cg07921	6.03828	7.52318	5.65782	0.150038	2.3531
Cg07973	1.02205	0.758318	0.842289	0.242008	3.78868
Cg08003	0.03478	0.401345	0	0.0615538	0
Cg08004	1.64992	1.39354	1.03429	1.63614	0.243438
Cg08022	2.57212	2.52147	0.384372	0.784307	1.31249
Cg08033	0.295966	0	0.0113561	0	0.277191
Cg08054	0.68795	2.7526	2.95422	0.284668	2.4228
Cg08055	0.0695204	0.601946	0	0.179932	0.473826
Cg08070	0.676287	1.92555	0	7.71915	4.65522
Cg08085	2.31651	5.60198	0.470185	2.70573	1.97594
Cg08090	6.57055	1.05284	4.6173	4.7614	7.14041
Cg08110	0.283928	0.716058	0.0725792	0	0.00747665
Cg08143	0.0558193	9.53149	2.11325	1.84248	2.19104
Cg08161	0.592218	1.19026	0.186956	0.970661	1.0477
Cg08167	0.269241	0.616536	0.127373	0.768527	0.29958
Cg08169	11.8552	4.45566	14.1986	8.46183	4.93566
Cg08192	0.438828	0.744314	0.204282	0.327093	0.324086
Cg08230	0.107878	0	1.1701	0.143846	0
Cg08237	16.1954	8.85586	36.0856	5.23232	5.92783
Cg08241	0.838984	0.575905	2.0377	0.641308	0.384043
Cg08270	0.170142	0.158287	0.0860702	0.563657	0.0142414
Cg08280	6.56503	7.93738	25.214	34.4935	16.9199
Cg08281	0.272674	0.0693051	0.308959	0.445474	0.383465
Cg08282	0.125237	0.0249769	0.191591	0.351793	0.293566
Cg08285	0.149558	0.377138	0.568681	0.517612	0
Cg08308	0.853398	0.176068	0.959219	0.424555	0.610007
Cg08309	33.8743	10.2105	30.2075	22.2137	16.0435
Cg08312	4.52572	2.42716	10.2382	3.26812	2.32625
Cg08316	0.798542	2.4138	0.457322	0.696758	0.334574
Cg08341	0.480725	0.736763	0	1.43654	0.0167689
Cg08395	0.548837	0.207766	0.482667	0.61307	0.549155
Cg08415	0.467253	1.6573	0.488813	0.268347	0.928133
Cg08418	7.00153	31.3501	6.61814	5.17579	10.0284
Cg08419	88.9473	128.797	310.292	36.6642	27.4736
Cg08421	14.155	15.6392	95.3264	3.1988	2.84043
Cg08439	3.93849	3.96092	0.355295	2.45462	2.0527
Cg08451	6.8988	3.33639	11.0788	4.81764	3.90069
Cg08466	9.38577	3.48627	7.88237	7.4154	7.74918
Cg08477	150.325	299.649	132.496	166.143	260.851
Cg08501	2.23045	0.437606	0.580974	4.64793	0.315831
Cg08513	1.39935	1.08259	0	1.58565	3.79536
Cg08515	0.388023	0.239837	0.188607	2.316	16.5185
Cg08545	16.2813	17.0929	37.6779	13.0461	13.0521
Cg08547	0.0602128	0.910556	0.0667437	0.695675	0.295505
Cg08591	4.17066	6.13263	2.11988	5.8117	4.41825
Cg08593	19.0889	34.1548	13.7456	35.0974	29.8836
Cg08608	1.75807	0.532002	8.03692	0.0473216	0.147823
Cg08611	2.60135	0.707903	1.87745	0.97559	4.77336
Cg08618	1.25825	2.21476	0.747811	0.586191	0.560635
Cg08643	20.8409	8.49369	21.2765	16.3581	19.3153
Cg08658	0.171251	0	0.0978103	0.883435	0.0114734
Cg08665	0	0.0109014	0.0238885	0.00401668	1.60828
Cg08668	14.1337	6.50675	16.7638	10.5358	6.08439
Cg08670	1.10354	1.20132	0.42686	1.14976	1.1245
Cg08672	8.96701	4.09221	20.08	5.97216	5.5859
Cg08673	22.693	11.4531	41.7297	21.1153	10.5058
Cg08689	4.61813	2.01983	4.3177	5.84132	7.13163
Cg08696	0.783753	0.123051	0.179644	1.8339	0.338642
Cg08699	0	2.08295	0.21329	0	0.116543
Cg08703	0	4.455	0.6182	0	0
Cg08704	9.5323	22.058	9.24365	0.386869	7.06483
Cg08705	2.54467	0.649756	4.65044	7.47535	2.94274
Cg08711	0	0.482957	0	0	0.0883508
Cg08748	5.85596	7.37499	22.6513	8.62581	3.42548
Cg08769	0.103966	2.58859	0.963122	0	0.565565
Cg08785	1.54807	0.929386	0.0383459	0	0.977664
Cg08789	18.616	2.16087	7.20587	3.26139	1.81674
Cg08805	0.644737	3.22534	8.21556	1.63124	3.03879
Cg08806	1.10025	3.22639	10.6358	0.387287	2.30159
Cg08832	0.0963433	0.0898464	0.202949	0.619729	0
Cg08843	3.42854	0.385335	0.7873	0.0457993	1.50842
Cg08845	0.902695	1.6405	1.47135	3.23179	0.779834
Cg08861	8.51854	37.4095	17.1575	34.6898	52.9609
Cg08862	9.72833	3.89136	3.07429	1.87353	0.385461
Cg08872	1.34299	2.19628	0.94489	1.6857	1.74258
Cg08893	4.18405	1.56786	3.50528	4.31721	3.70757
Cg08908	51.6024	79.4706	24.8175	8.93775	49.4586
Cg08919	0	0.245938	0	0.0816201	0
Cg08922	7.67782	14.5742	5.19103	4.26333	3.19872
Cg08923	21.5965	7.40639	16.1376	10.0039	5.71223
Cg08941	1.76982	0.55604	2.41014	0.790376	0.155516
Cg08960	0	0	0	0	1.09162
Cg08963	4.72838	2.01356	4.181	4.67955	12.5869
Cg08970	0.0766874	0	0	0.6831	0
Cg08981	0.561255	0.228079	1.16548	4.83971	34.301
Cg08983	0.81583	1.01463	0.52191	0.560663	2.56275
Cg08987	37.3116	12.682	35.7715	17.4352	24.2356
Cg08993	1.55428	0.789474	0.440644	0.690789	4.5785
Cg08997	2.73168	5.32196	1.932	3.32993	2.48881
Cg09009	5.27658	2.85215	7.22246	4.8783	3.1307
Cg09018	0.0377797	0.45857	0.0123215	6.13559	6.92445
Cg09021	0.29066	0.507753	0.595471	0.772337	12.9268
Cg09035	0.770601	2.31008	0.752957	0.583076	2.971
Cg09036	0	0.940033	0.0815733	2.21562	1.06181
Cg09037	1.66601	2.97774	1.22075	0.771257	1.28244
Cg09042	21.2447	44.2109	18.2435	71.9429	90.0755
Cg09043	0.278014	0.624131	0.381789	0.92927	5.70244
Cg09046	0	0.425237	0	0.0268772	0
Cg09049	0.0939923	0.29682	0	0	0.504557
Cg09050	0	0	1.19105	0	0
Cg09059	9.66419	0.0410082	1.52608	3.82319	0.5915
Cg09086	29.4417	11.5868	35.0748	17.9038	4.69225
Cg09099	4.15182	0.333565	1.61038	0.47654	0.975926
Cg09118	0.863725	3.89885	1.19291	0.661894	0.271073
Cg09120	0.376335	1.19905	0.131044	0.360511	0.441254
Cg09123	0.0649302	0.696241	0.0521786	0.0502172	0
Cg09124	1.88203	4.56671	2.07784	3.44475	2.35006
Cg09128	1.35967	0.570009	0.446722	0.474361	1.61581
Cg09141	2978.61	1914.34	3777	2502.08	3562.87
Cg09152	0	0	0.449318	0.027696	0
Cg09165	9.83629	5.46175	13.4052	6.54723	6.20492
Cg09172	1.9674	1.36899	4.19491	2.14693	3.73088
Cg09184	52.6979	34.6814	67.7722	52.9563	64.7918
Cg09185	3.29436	2.60505	5.58295	1.68522	2.27727
Cg09191	0.362478	1.16101	0.437771	0.63967	1.88974
Cg09203	4.92121	10.77	2.13225	1.7512	6.78492
Cg09204	0.916933	0.622333	3.39725	2.64669	2.69466
Cg09206	14.3838	22.2896	9.84025	7.16996	13.0998
Cg09220	12.6005	22.2252	7.89157	7.88377	6.31726
Cg09227	0	0.0083224	0.00730612	0.00616219	0.092186
Cg09232	0.0142704	0.0533495	0.0113658	0.00220946	0.0145264
Cg09234	0.514821	0.30113	0.25535	0.121088	0.928968
Cg09242	9.32308	12.8176	5.46357	9.82298	20.8552
Cg09262	0.544854	2.419	0.157232	7.60503	3.08912
Cg09286	2.44359	1.69487	3.8158	3.06717	2.19428
Cg09313	0.109864	1.26721	0.170277	0.131775	0.0844709
Cg09322	0.149763	1.63639	0.0366328	0.226879	0.207553
Cg09323	21.6716	4.31028	24.7778	17.84	10.5101
Cg09325	3.49804	2.17186	3.77344	4.36377	1.23053
Cg09342	0.379023	7.543	0	0.180707	0.352764
Cg09345	1.23035	1.33689	2.99534	3.15218	2.3154
Cg09355	1.79745	1.81076	0.0258818	0.158929	0.084815
Cg09358	14.7873	6.22064	7.36609	13.7667	4.64969
Cg09375	1.42025	3.66827	0.751333	1.63016	1.00177
Cg09381	0	0	0.149695	0	0.463418
Cg09382	3.9396	3.9472	0.46942	6.90173	2.79165
Cg09385	10.7697	6.4327	14.8153	10.5677	4.859
Cg09392	0.0719741	0.323808	0	0.0502729	0.0977131
Cg09393	0.128041	1.82412	0	0.970556	0.979008
Cg09405	28.969	6.7157	17.2593	12.9124	1.42346
Cg09406	1.03801	0.89431	0.382617	1.19403	0.317766
Cg09428	7.17586	23.576	10.0361	10.182	21.0025
Cg09431	15.5217	21.1151	63.0475	14.813	7.29845
Cg09460	144.471	268.42	382.625	250.024	115.988
Cg09463	19.1313	23.4817	11.0395	17.4443	16.9418
Cg09493	0.256644	0.0803796	1.79135	0.0586709	0.298709
Cg09497	0.0486753	0.142767	0.0323426	0.717801	0.0319342
Cg09527	0.6698	0.24462	1.42291	0.918499	0.660612
Cg09538	0.661421	0.916193	4.36686	2.39192	2.04069
Cg09540	30.8049	30.4246	132.616	65.386	54.2617
Cg09542	113.287	43.8341	146.327	96.155	50.0696
Cg09543	0.364527	2.27423	0.157898	1.64347	1.87069
Cg09555	0.181264	0.186705	0.0900594	0.00626804	0.158735
Cg09557	2.48125	5.02829	1.32723	1.27006	2.40756
Cg09574	8.16885	22.1921	7.64221	11.9187	14.4069
Cg09585	1.72203	6.40051	2.18461	1.24494	1.50171
Cg09607	0.989043	2.46449	2.51682	2.34706	0.498274
Cg09617	58.1013	28.3301	67.0778	42.4608	37.8153
Cg09628	0.463636	0	1.06631	0.0542361	0.318208
Cg09645	41.5458	13.1353	27.3087	15.4592	20.9364
Cg09655	2.48984	1.07917	3.22088	1.57804	1.24014
Cg09660	4.31285	2.90507	5.90501	5.30255	5.47504
Cg09666	0.226404	0.356318	4.179	0.0177091	0.558527
Cg09671	0.278677	0.723243	0	0	0.124055
Cg09694	33.7424	15.4531	35.476	21.2008	11.7539
Cg09707	0.542727	1.56237	0.681166	0.617246	3.83577
Cg09711	1.12627	0.389484	0.857839	6.40179	0.729335
Cg09712	0.0817791	0	0	1.85177	0
Cg09715	0.676678	0.607322	0.522634	4.91569	0.184316
Cg09730	33.454	5.71163	64.3286	10.8726	18.3549
Cg09731	16.5051	8.53523	41.0428	8.34925	13.3834
Cg09762	3.96241	5.01091	1.65987	1.37315	2.0888
Cg09787	0.447216	0.441808	0.486494	1.64469	0.272901
Cg09804	0.744808	0.58127	1.76543	1.1543	2.34261
Cg09813	10.9571	13.3067	5.44035	3.00473	7.22414
Cg09824	0.150103	0.856137	0.0597899	0.0897411	0.215364
Cg09840	45.0562	13.794	49.9618	22.3429	15.3783
Cg09851	1.6214	1.74379	5.4478	0.258525	0.233418
Cg09862	2.63182	8.46433	2.53577	5.75673	7.263
Cg09872	3.94661	13.2701	4.40114	7.88385	18.3164
Cg09875	110.887	33.8534	181.442	56.4327	41.3217
Cg09884	0	0.315621	0.0112616	0	0.0272315
Cg09890	0.244135	1.20206	0.258141	0	6.64757
Cg09899	0	2.28038	0.202046	0	0.0713406
Cg09905	133.276	58.7689	119.913	60.3902	66.3123
Cg09907	0.565982	0.479656	0.361838	0.477543	1.34286
Cg09925	25.7725	46.7822	20.15	178.322	151.504
Cg09946	0.0831147	0.871478	0.426091	0.020658	0.43966
Cg09950	3.4266	7.58969	25.2852	0.722093	0.842916
Cg09956	168.628	94.4835	193.138	86.3702	78.4286
Cg09973	2.04913	3.07621	0.852071	0.361394	1.40417
Cg09975	0.168273	0.723429	0.0179738	2.49492	3.34577
Cg09978	5.21929	5.0117	2.2374	3.41774	3.74078
Cg09984	8.9917	1.53179	8.95491	0.057747	0.32099
Cg09986	6.85277	1.16983	23.3521	3.66351	1.71225
Cg09987	38.081	21.11	83.0025	34.9778	24.66
Cg09989	4.73762	19.2016	5.91838	8.25116	7.18222
Cg09997	1.02817	0.283272	2.07553	0.26826	0.602089
Cg10000	1.58295	2.6433	0.690079	0.399136	0.807432
Cg10009	0	0	0.0401378	0.944518	0
Cg10010	36.732	15.1136	52.2494	29.5431	30.9604
Cg10016	7.24811	10.2168	25.9874	9.59748	8.31964
Cg10040	7.29715	15.1357	5.53258	9.17547	8.85413
Cg10045	6.4306	1.58878	5.02635	8.61059	4.66582
Cg10072	23.0264	28.847	12.7612	21.9294	14.9706
Cg10113	26.7008	8.29779	25.8666	20.5256	11.8658
Cg10130	6.30693	9.11333	4.30412	5.36708	7.40563
Cg10150	1.2231	0.0966115	1.92605	0.153104	0.138958
Cg10157	5.8625	2.34803	8.48029	5.14805	4.14876
Cg10159	21.9915	8.07224	17.2852	15.5478	16.0714
Cg10169	0.305231	0.178948	1.42856	1.11566	0.0619403
Cg10178	4.54125	5.8507	15.7101	3.69961	5.04321
Cg10179	34.8224	19.8001	45.3577	25.8831	43.7293
Cg10188	16.1984	4.51962	2.38188	6.77814	2.14897
Cg10205	11.3976	6.81317	15.5406	9.12009	10.857
Cg10218	9.79034	6.89004	14.3528	7.42151	7.03646
Cg10219	0.0795662	0	0.229723	0.0476389	0.0634039
Cg10239	0.810228	1.91793	0.698627	1.12137	0.59127
Cg10241	47.8873	80.2823	38.6096	279.012	279.475
Cg10250	16.7362	2.915	7.99866	10.522	10.3022
Cg10251	30.9931	13.9236	40.3462	27.7901	21.4819
Cg10265	26.3363	44.8737	11.4961	3.69888	10.4828
Cg10267	0.0955446	0.0703365	0.0229359	0.027903	0.800244
Cg10268	0.162416	0.293633	0.676153	0.835274	0.160815
Cg10273	0.553236	0.0838311	0.19493	1.76092	0.213766
Cg10280	0.0269499	0.0877777	0.247442	0.107807	2.82085
Cg10281	0.952528	0.237974	1.36778	1.68499	1.38299
Cg10316	1.79866	1.01096	2.4704	0.682248	1.45957
Cg10326	109.041	46.2083	103.478	110.027	128.133
Cg10344	0.291817	0.944116	1.5231	2.75933	0.295072
Cg10397	25.7592	0.463244	0.0767944	0.0476051	1.78577
Cg10401	3.06882	1.18859	2.33253	1.17006	1.60329
Cg10404	8.91178	3.24868	19.9296	11.5177	8.01958
Cg10418	15.243	8.85726	17.2961	12.1744	12.8048
Cg10436	9.6667	14.2717	3.37173	4.16996	0.793832
Cg10456	1.19177	0.0249982	0.731583	1.6154	2.18676
Cg10467	2.08318	5.23237	1.90015	0.340547	1.1454
Cg10478	1.48227	7.64529	1.82442	0.820728	0.331419
Cg10482	6.43734	2.59518	5.29523	5.26931	6.08954
Cg10486	1.46658	3.79163	1.35511	0.849674	0.51633
Cg10492	31.9308	7.51095	16.1943	20.2924	17.7246
Cg10505	0.565243	2.31616	0.186889	0.701601	1.78126
Cg10522	0.204129	0.876871	0.815137	0.978321	5.07948
Cg10533	3.53537	8.54121	2.89305	8.71157	9.57438
Cg10545	27.8588	44.0399	12.8239	14.6275	42.2937
Cg10551	1.29469	3.04807	0.902599	4.60062	4.13425
Cg10553	0.148952	0.0150826	0.398259	0.853131	0.297386
Cg10573	0.779803	0.393411	1.51366	2.70588	0.0655829
Cg10576	0.387411	0	0.0535014	0.899886	0
Cg10578	0.276981	1.01916	4.30589	3.99276	3.22494
Cg10583	2.27245	5.0208	2.05155	5.01284	3.54733
Cg10584	2.36033	0.938766	1.11276	2.69215	0.420764
Cg10587	1.94777	0.68981	2.01438	2.28256	2.81984
Cg10591	4.87185	21.7978	5.70356	6.89333	12.4298
Cg10606	42.6159	57.0598	22.0626	34.0273	23.4105
Cg10617	7.41395	8.49398	2.47127	0.352455	3.1578
Cg10638	2.38003	0.357773	1.57133	0.933665	1.33735
Cg10646	0.122106	1.71059	0.0881425	0	0.0279473
Cg10651	18.6624	17.0146	33.8724	33.3806	20.7279
Cg10656	0.474669	0.170103	0.104017	0.663169	0.136491
Cg10658	0.264483	0.54408	1.19424	2.1021	0.0975016
Cg10675	0	0.951109	0	0.695045	0.0963808
Cg10694	0.637276	0	0.674035	0	2.02872
Cg10724	0.620913	0.195195	2.05679	0.461153	1.75043
Cg10749	3.52574	1.64496	5.03542	2.4574	3.00412
Cg10762	1.08522	0.877914	11.4342	2.00525	3.21881
Cg10781	0.173708	0.461978	0.129235	0.0454338	0.477552
Cg10795	0	0.208594	0	0.384274	0
Cg10798	1.56634	0.650784	9.98894	2.10081	2.59866
Cg10809	2.10043	3.09904	1.28422	2.239	2.28232
Cg10810	0.612991	1.55666	0.45953	1.31235	4.1068
Cg10837	0.104982	23.8898	0	24.3646	0
Cg10841	0	0.0336263	0.664276	0.182608	0.742362
Cg10889	1.3233	4.20471	0.611066	27.0696	4.46015
Cg10904	0.164909	0	0	0	0.361046
Cg10905	3.62508	1.42848	3.63238	0.916444	1.15622
Cg10940	8.67613	6.54937	19.1735	9.51058	18.3135
Cg10943	11.1919	4.09122	15.7006	8.8664	2.72579
Cg10979	0.188208	0.276914	1.02753	0.598692	0.568905
Cg10995	127.877	42.5642	126.912	140.511	84.1146
Cg11010	1.3087	0.96402	0.436267	4.31874	0.408843
Cg11024	13.7912	2.89127	7.74199	6.55926	6.20844
Cg11045	0.0157351	0	0.0909913	0.0247165	0.488912
Cg11056	1.47305	13.8216	2.0509	1.44588	0.761766
Cg11066	166.69	127.653	255.104	173.741	119.087
Cg11068	1.39933	1.80841	0.687983	1.98771	1.17725
Cg11089	0	3.10632	0.0659229	0.0629566	0.689623
Cg11091	0	0.0280743	1.12164	0	0.211303
Cg11098	13.8199	6.1991	15.5611	14.1932	14.2302
Cg11101	0	0	0.600022	9.41816	99.7904
Cg11103	53.6729	54.2953	199.651	41.0192	44.9378
Cg11107	0	0.135989	0.147152	0.357853	0.0406151
Cg11131	5.43942	13.9481	5.44356	24.5303	16.7621
Cg11152	0.0257976	0.0125688	0.0550845	0.746959	13.352
Cg11173	0.110188	0.182052	1.14721	0.0528764	0.697101
Cg11174	1.76252	1.66186	3.5812	2.11726	0.331965
Cg11175	0.0154607	0.184237	1.96814	0.626014	0.184408
Cg11177	33.1601	66.3006	26.2104	25.1036	28.075
Cg11184	23.6256	7.57765	20.1386	21.3714	20.7305
Cg11192	0.255875	0.879039	0.178603	0.243924	0.304837
Cg11198	6.92592	3.10326	6.80162	4.26366	6.78218
Cg11200	0.94535	1.00895	2.60565	0.682253	2.12503
Cg11207	0	0.392616	0	0	0
Cg11212	0.312	49.1502	6.11123	17.0825	30.1989
Cg11216	0.0637271	6.78594	8.43076	0	5.09985
Cg11218	11.1543	9.11137	34.2522	41.4061	14.587
Cg11219	3.72072	0.850849	6.99523	6.59323	3.756
Cg11222	0	0.0121617	0.527654	0.36742	0.142599
Cg11238	6.39753	2.29902	4.87274	6.83171	8.03162
Cg11251	10.2549	24.1183	8.88121	6.05676	4.08502
Cg11261	1.4929	1.40369	0.136747	1.00971	0.653597
Cg11266	0.714381	0.969793	1.54964	2.17659	0.44185
Cg11269	0.538095	1.19545	0.274006	0.840036	0.466519
Cg11272	0.269306	0.100444	0	0.0233835	18.3003
Cg11287	1.81381	4.34072	1.78824	0.629223	1.00551
Cg11297	0.404418	0.220822	1.50519	0.527211	0.56136
Cg11311	13.9264	6.27549	15.4011	12.4907	18.0917
Cg11333	41.6341	36.3295	78.2763	27.7012	9.94488
Cg11334	33.9479	101.514	26.0469	34.4634	37.974
Cg11337	3.74601	2.1461	6.01451	3.26399	3.55047
Cg11344	6.4087	15.5441	14.3896	1.83627	45.7864
Cg11346	0	0.971715	0.533941	0	3.5576
Cg11350	0.488693	0.261877	1.20783	0.934634	0.0245902
Cg11357	0.274077	0.0918474	0.577711	0.489085	0.0233753
Cg11360	0.703805	0.400836	0.55872	4.82913	0.596836
Cg11363	12.3577	2.28039	7.25323	14.698	14.1574
Cg11378	36.6209	159.739	57.8877	4.83321	47.9399
Cg11381	82.3916	61.5077	138.01	88.2056	75.5753
Cg11383	74.0486	336.944	118.377	6.62116	98.0361
Cg11395	3.95317	5.61548	9.02811	9.57782	1.14029
Cg11420	32.4258	10.3467	20.8568	11.378	11.9293
Cg11421	4.144	1.92031	9.08252	4.52642	2.87424
Cg11449	0.766195	0.518849	0.541407	0	1.89491
Cg11450	0.595466	0.374478	1.40449	0.0722504	1.19176
Cg11453	6.73839	4.54955	3.11562	0.160598	2.54601
Cg11462	0.029279	0.443758	0	0.134426	0.858951
Cg11471	0.858961	2.33563	0.239113	1.04082	0.0569658
Cg11472	0.30769	0.918113	0	1.07344	0.143353
Cg11504	0.388115	0.843096	0.0931764	0.148035	0.36707
Cg11509	2.3065	7.1593	1.58677	10.5594	7.4251
Cg11511	39.7568	33.5425	38.0961	11.6788	41.3747
Cg11548	0.13957	18.1324	0.571974	0.494022	1.66902
Cg11549	0.121316	9.50774	0.349283	0.0790136	0.165813
Cg11588	0.39029	0	1.53388	1.58449	0.353242
Cg11600	0	1.27748	0.0243085	0.0606842	0
Cg11609	2.32642	0	1.58459	1.03868	0.469857
Cg11611	1.42568	6.05102	1.79146	6.49879	1.20416
Cg11620	1.37449	1.67679	0.476964	0.886761	0.693021
Cg11638	0.631995	0.126755	0.0418312	0.00703362	0.267201
Cg11647	0.95183	0.449558	0.24726	0.0375095	0.756269
Cg11662	0.0559742	0	0.369173	0	0.0260703
Cg11663	1.00102	2.25418	1.41102	2.16196	0.568959
Cg11666	0.0818617	1.08847	0	0.978989	0.949728
Cg11724	0.727019	0.204862	2.76768	0.205897	0
Cg11731	439.363	884.099	116.477	714.29	314.562
Cg11732	0.763394	3.20027	0.788396	2.96911	1.54641
Cg11736	206.209	136.32	307.015	134.68	199.601
Cg11764	0.229748	0.293385	0.194685	0.408617	2.17381
Cg11765	0.70261	2.21478	1.82884	1.24412	5.32754
Cg11768	0.67654	2.10773	0.308876	29.8059	13.2596
Cg11774	0.0708899	0.313274	0	0	0
Cg11828	3.44697	2.59285	9.82109	0.844353	1.083
Cg11841	2.98719	6.10449	1.34005	0.499653	4.42079
Cg11856	1.88893	0.484955	3.64171	3.35356	2.65523
Cg11872	1.98233	0	3.8884	0.169442	0.235375
Cg11901	0.410175	1.0093	0.0840189	0.108164	0.455176
Cg11909	0	0.0480632	0.019045	0	0.461042
Cg11910	0.0627648	0.0113786	0.38236	0.0120296	0.149145
Cg11911	0.542708	0.64728	0.090509	0.212343	0.126764
Cg11916	2.91077	2.4442	6.97792	5.37313	5.13257
Cg11940	0.361452	0.899575	0.0383285	0.0237599	0.0404461
Cg11950	0.764444	1.61998	0.372364	0.954016	1.38122
Cg11954	1.77435	5.01759	1.08641	3.89611	3.49888
Cg11960	1.11285	1.98101	0.508816	2.2409	1.72552
Cg11966	9.28137	12.3661	33.7642	6.00751	7.66915
Cg11985	0	0	1.63422	0	2.33894
Cg12018	0.0699539	0.696808	0.0321102	1.02001	0.0225084
Cg12028	0.117739	1.28208	0.212262	5.29429	0.333478
Cg12031	158.27	125.09	561.858	86.3647	126.499
Cg12033	11.381	10.7456	25.3407	16.1734	5.67831
Cg12059	1.07087	1.52251	0.0700094	0.125113	1.98254
Cg12076	1.78923	0.250329	0.51436	2.23943	0.0569658
Cg12077	9.73651	0.0553204	0.850195	0.0943309	2.51426
Cg12093	1.36852	4.14763	1.38526	3.873	0.217158
Cg12102	0.155867	0	0	0.717311	0
Cg12109	9.5491	32.5496	8.23887	54.235	28.9781
Cg12114	0.0759965	0.0310245	0.0158606	0.529377	0
Cg12120	1.42204	0.96932	0	0.737808	0.452961
Cg12158	4.44151	1.55693	2.99573	3.64308	0.783457
Cg12171	0.723175	0.692366	0	2.35612	0.56977
Cg12192	9.58286	14.0074	5.96044	4.42171	8.00883
Cg12224	1.17938	0	0.424525	0	0.0566347
Cg12235	4.53556	4.86662	5.22286	6.07716	2.25119
Cg12266	4.24486	3.8129	7.65386	5.01598	3.83625
Cg12268	2.45023	0.718519	3.46533	1.62077	3.33154
Cg12302	65.0494	38.7077	99.9339	85.7939	48.9564
Cg12316	0.0961711	0	0	0	1.4049
Cg12319	2.83489	0.980991	2.89754	2.85145	3.21144
Cg12324	21.6896	9.32848	17.2227	3.17083	8.47348
Cg12325	14.6655	4.72951	9.82396	16.9551	13.7923
Cg12339	2.0346	19.8028	5.47576	10.0216	14.9157
Cg12342	0.708637	0	2.70141	0	2.27431
Cg12351	66.765	10.9191	92.2883	17.2678	57.5363
Cg12353	0.778497	0	13.5572	1.17909	1.23038
Cg12361	0.737909	0.17832	1.67194	2.39173	0.957207
Cg12380	1.13217	0.826312	1.90327	1.77431	0.672786
Cg12382	0.450828	0.665937	0.223461	4.58435	0.923796
Cg12392	19.6256	3.62199	9.48114	3.68083	0.0987001
Cg12424	17.4672	8.46725	20.1291	15.7862	19.5493
Cg12432	47.3352	15.1933	34.3996	22.1743	12.9603
Cg12476	5.69267	9.0686	3.40293	7.01205	7.14265
Cg12492	0.0337978	0.0832642	0	0.0117429	0.210096
Cg12534	11.93	14.293	12.2001	3.32129	10.42
Cg12551	0.0772449	0.15066	0.0405788	0.841011	0.0174781
Cg12575	0.208208	1.08723	0.3147	0.186888	0.28367
Cg12576	1.8706	3.157	0.717058	0.137715	1.07475
Cg12591	0.500263	0.0830018	0.729115	1.06988	0.301525
Cg12600	0.368182	0.43883	0.0243574	0.0211001	0.141465
Cg12607	26.8734	116.481	28.8579	29.6533	45.6558
Cg12615	0.102994	0.531728	0.0319047	0.0222909	0.0418011
Cg12619	1.68855	1.72677	2.28373	1.30621	2.68667
Cg12621	0	0.702816	0	0.0458324	0.427421
Cg12626	0.321357	1.62996	0	0	0.0849293
Cg12635	41.1501	31.4342	77.6449	25.655	58.7469
Cg12638	8.13475	15.5786	5.265	2.2402	2.78112
Cg12645	0.0399742	0.115547	0.173853	0.0744627	0.816064
Cg12651	0.4497	3.4003	0.918144	0.151572	0.456738
Cg12652	1.39762	7.08285	1.45501	3.59196	1.59623
Cg12654	0	0	1.14588	0.380743	4.32584
Cg12671	2.32151	0.49604	2.6621	1.50487	2.25398
Cg12672	4.08033	2.36539	8.60007	5.16259	2.61665
Cg12712	0.329668	0	0.680958	3.86507	0.0795557
Cg12714	4.63768	2.32497	6.97375	4.31175	4.74759
Cg12721	0.316481	0.65833	0	0	1.10931
Cg12729	0	0.0438214	0.111467	0.683034	5.47993
Cg12754	0	0.174483	0.118743	0.608746	8.0209
Cg12755	1.59549	3.79025	1.23787	0.801683	0.779316
Cg12767	0.720035	2.13164	0.0489595	0.241881	0.249231
Cg12789	1.14812	1.07203	2.12308	22.9251	136.854
Cg12796	1.46158	4.43518	1.55529	1.43044	1.84152
Cg12797	0	0.59373	0	1.05158	0.0851712
Cg12800	0.478433	2.49509	0.695809	0.985454	1.74393
Cg12801	38.3362	6.88586	18.6245	15.4562	12.1311
Cg12842	22.7236	8.74077	30.0054	34.5015	40.4715
Cg12847	72.8319	65.6964	234.881	81.9779	79.612
Cg12854	0	0.18345	0.261389	2.7525	20.1694
Cg12884	177.985	110.944	259.222	156.888	247.988
Cg12892	0.117416	1.32733	0.270857	0.418609	0.351002
Cg12900	0.457867	0.602926	0.541143	0.164444	0.921296
Cg12902	59.0295	9.27919	28.837	26.9567	28.4058
Cg12906	0	0.279332	0	1.70096	39.6224
Cg12926	10.7745	26.5162	9.7918	17.0416	44.2419
Cg12928	1.69714	1.08855	5.73367	9.71011	6.61006
Cg12937	3.05984	0.505806	2.38048	1.30427	0.948037
Cg12942	2.40078	0.106369	3.05729	0.712214	0.139173
Cg12956	2.67869	1.05377	4.73932	1.06578	0.694381
Cg12973	1.95122	0.266906	9.17784	1.90849	0.836307
Cg12974	2.05509	0.102885	4.84867	1.15751	0.975899
Cg12987	26.0612	117.889	8.93712	11.9978	18.9745
Cg13012	0.847827	0.0517348	8.08743	1.95602	0
Cg13024	31.178	24.1211	59.4615	67.9565	55.5367
Cg13032	1.62819	0.788936	2.88165	0.501793	2.78014
Cg13040	0	0	0.505852	0.0297132	0.858327
Cg13045	0.92671	0	0.363721	1.58449	0.0480649
Cg13059	0	0.152743	1.77545	0.444075	0.0958025
Cg13067	5.48131	2.39034	11.8161	11.056	5.15965
Cg13070	0.771902	2.12422	0.0800332	1.11829	0.742408
Cg13080	0.149599	0.014475	0.736284	0.154082	0.406435
Cg13091	1.72521	2.27886	8.28019	2.89424	1.24404
Cg13093	111.322	63.3954	141.549	64.66	58.0394
Cg13113	3.60166	3.73889	9.35271	5.05791	4.85553
Cg13118	12.6797	12.5951	20.7654	10.6059	37.398
Cg13123	69.1687	25.3745	93.0657	31.33	29.2178
Cg13124	95.5642	33.163	120.196	81.9881	22.0789
Cg13127	113.138	212.654	77.4531	114.209	79.5622
Cg13188	1.07306	6.81616	0.819728	0.596202	0.258844
Cg13196	0.525572	0.701182	0.255171	0.0216955	0.60406
Cg13203	0.703164	1.62277	1.72726	0.294157	2.60233
Cg13204	0.209873	0.0382142	0.245921	0.129741	1.35088
Cg13208	4.6037	6.05693	12.8658	5.64939	3.56459
Cg13210	15.4489	6.72155	13.9846	10.2276	10.0662
Cg13211	11.275	11.2692	22.0293	16.1941	16.0991
Cg13221	63.812	46.7076	108.73	70.7509	81.2467
Cg13223	0.795722	0.201603	1.56567	1.38173	1.39401
Cg13233	0.614159	0.601462	0.0724446	0.085597	0.229217
Cg13251	0	0.150437	0.618107	0.0651069	1.92115
Cg13262	1.90472	0.997469	2.30037	2.44606	0.63737
Cg13273	16.6164	11.7921	8.70211	4.31666	11.8962
Cg13276	4.43202	1.22118	2.70931	6.1735	4.74896
Cg13294	24.6959	6.85076	21.2619	20.4293	20.5006
Cg13298	1.27725	3.46543	0.384531	0.167558	0.479536
Cg13315	0.244599	0	0.491265	0	0.521016
Cg13329	5.89221	7.56189	3.6183	9.51024	10.7515
Cg13332	12.4363	24.3638	9.22451	88.6138	68.1558
Cg13341	8.96727	13.7505	5.64054	6.01561	10.2691
Cg13350	5.50257	2.41643	5.00906	7.13601	7.40165
Cg13353	20.874	21.8002	158.272	63.0904	62.149
Cg13370	0	0.67822	1.04257	0.416585	0
Cg13383	1.05142	0.857586	0.803593	0.0124829	0.736368
Cg13400	0.034658	0.601597	0.0208274	0.440618	0.590782
Cg13402	0.606924	0.623409	4.0424	2.82364	0.586118
Cg13404	10.5901	5.84001	12.9884	9.4187	8.46457
Cg13411	4.62441	2.05628	4.68405	3.39891	3.37007
Cg13420	2022.65	1152.27	10852.7	2279.72	1974.94
Cg13424	7.88945	22.8989	9.96346	38.9379	28.1857
Cg13425	0	0.0283116	0	0.318789	0.0221468
Cg13444	14.2207	29.1113	13.0481	19.3615	14.5952
Cg13457	10.7294	80.8931	17.4649	5.34773	3.73788
Cg13458	0.0504424	0.836357	0.0202086	0.167274	0.436238
Cg13467	2.49617	4.84416	1.93468	3.87623	4.76047
Cg13471	3311.22	6894.01	4834.19	2486.3	4883.65
Cg13477	1.1111	1.55688	1.008	0.117376	1.84163
Cg13482	3.80306	0.441679	2.28066	2.02186	3.62593
Cg13490	128.93	47.1332	99.1046	90.0619	80.8048
Cg13494	0.427936	0.449383	0	0.236852	0.0157393
Cg13521	10.683	19.9265	8.15318	8.67072	10.5239
Cg13527	6.29847	3.60965	9.32166	5.93171	5.44118
Cg13529	0.96222	4.28074	1.35005	2.33366	1.57529
Cg13551	3.07847	13.581	3.54981	31.7655	23.3871
Cg13565	0.0269499	0.125103	0.121774	0.114055	1.80173
Cg13596	15.3431	10.9927	64.5406	30.3701	33.4634
Cg13606	1.78324	3.98759	7.01298	0.232183	1.42041
Cg13618	7.99352	3.62369	10.2175	10.1795	2.50941
Cg13646	2.42456	4.69736	2.0926	2.11919	2.01178
Cg13651	1.15928	5.44329	1.48114	7.83262	4.42786
Cg13670	0.803772	2.45502	0.918431	0.694691	0.913133
Cg13686	0.79023	2.36779	1.95782	1.00638	15.7794
Cg13687	0.111143	0.479624	0.315674	0.296028	5.25178
Cg13730	3.46683	0.751395	2.01558	0.705278	1.0595
Cg13736	6.30809	9.58778	4.07035	9.76436	5.77317
Cg13745	1.32514	1.43838	12.7175	16.0322	1.02611
Cg13763	0.695265	0.177308	0.54906	1.13248	0.177332
Cg13794	0.150253	0.572419	0.0649815	0.478336	0.283831
Cg13809	0.935284	1.24371	0.808605	2.62302	0.888481
Cg13810	1.70248	0.73692	3.95525	1.70565	0.447806
Cg13811	6.18247	0.638829	9.47446	8.17448	3.4759
Cg13812	5.2352	2.91618	9.8987	2.81472	0.744067
Cg13829	1.84124	0.341275	0.168892	1.60954	0.259918
Cg13830	6.47903	2.88017	10.0462	11.4817	5.3458
Cg13861	5.86696	3.86279	7.51296	5.66546	5.3369
Cg13875	6.22064	2.2703	6.94589	18.1749	8.19584
Cg13889	11.2346	15.8656	7.40448	8.96805	6.51141
Cg13899	43.53	20.247	46.0939	27.9196	24.9865
Cg13910	30.981	18.8544	36.7971	49.5166	65.9643
Cg13913	71.9993	175.025	49.48	176.582	76.3187
Cg13925	4.36689	9.28963	3.85339	5.14524	4.32771
Cg13931	11.0374	6.35154	19.8253	18.5646	30.0406
Cg13932	25.2614	14.8224	33.7717	27.3866	34.5139
Cg13963	7.79841	13.5485	6.4452	14.5259	9.09685
Cg13972	0.104389	2.71904	0.704455	0.521827	0.860295
Cg13973	0.124978	0.940727	0	0.183569	0.431566
Cg13979	11.6886	32.7981	15.4144	24.3615	20.3391
Cg13984	0.565615	3.2259	0.35945	1.257	0.504361
Cg13991	0.0783663	0.0432119	0	0.0190067	0.293587
Cg13995	0.139406	0.927895	0.480425	0.519141	0
Cg13999	0.25517	0.024053	0.593219	3.13064	0.240648
Cg14003	4.79937	7.63821	3.28046	6.22594	5.75274
Cg14010	28.5474	33.1298	14.512	11.549	17.205
Cg14012	1.94125	1.49268	0.0849081	0.552613	0
Cg14021	0.156867	0	0	0	3.83336
Cg14023	0.312487	0	0.293646	1.08435	0.114473
Cg14026	0.257763	0.687383	0.0882344	1.35111	1.53461
Cg14027	3.92459	22.4925	4.10277	7.67157	6.54828
Cg14033	11.5592	12.9608	4.87392	24.6345	16.1587
Cg14035	1.45144	0.213033	1.4752	2.24721	1.1822
Cg14044	1.31751	1.78298	0.736479	0.845199	1.30013
Cg14045	8.02187	1.97426	5.08102	5.96557	4.1348
Cg14057	8.98224	7.1457	11.9005	9.3456	24.2117
Cg14122	1.13295	0.966948	0.967491	0.625227	1.68856
Cg14137	0	0.0391819	0	0.0866205	4.93416
Cg14156	2.89228	2.57151	12.9128	0.068297	1.36577
Cg14157	0.169625	1.07186	2.09591	0	2.8097
Cg14158	2.42018	2.36695	8.70181	4.39259	2.04065
Cg14169	0	2.28384	0	0.158341	0.0989764
Cg14174	0.0942836	0.102172	0.0751598	0.756242	5.12591
Cg14187	0.152829	0.327784	0.207562	0	0.421673
Cg14199	39.8543	10.7592	30.4271	17.2811	16.0126
Cg14214	12.0897	31.8728	86.4384	16.1243	1.7624
Cg14221	6.41122	8.30801	2.84978	3.27497	4.29687
Cg14230	1.91705	3.34265	1.42083	2.80107	2.09349
Cg14241	3.22664	1.76557	3.86963	5.21792	5.40519
Cg14245	4.35774	2.95523	12.5182	2.39295	0.935967
Cg14276	25.2929	8.56675	18.0563	17.2631	22.9597
Cg14297	10.1224	2.6965	1.84786	1.89697	7.88321
Cg14298	48.6717	15.8858	38.0414	43.9155	82.953
Cg14322	23.3441	92.0524	23.4589	30.0891	39.656
Cg14340	6.04808	4.178	8.33379	5.98158	7.51289
Cg14341	2.84622	3.57579	7.88433	6.16533	10.8221
Cg14358	194.195	76.2021	170.915	144.337	94.7545
Cg14365	2.35177	0.16747	2.00924	3.30396	0.983899
Cg14381	1.55203	2.777	0.830028	3.50781	1.91623
Cg14402	0.0854138	1.4587	0.119747	0.138191	0.0536785
Cg14427	8.52711	4.87479	12.956	7.43088	6.84747
Cg14432	16.9852	22.7087	8.83142	8.94297	15.17
Cg14434	0.177812	1.37577	0.0801504	0.037054	0.0171639
Cg14436	1.51453	0.382839	3.39995	1.90757	0.605398
Cg14440	2.26118	3.98784	0.804415	2.13728	1.22367
Cg14441	1.08296	6.52211	0.176899	0.839956	1.5117
Cg14455	4.84474	6.76502	1.58877	3.54733	6.91148
Cg14457	1.54141	0.874374	2.53158	0.2217	0.278938
Cg14474	46.5643	23.345	63.4114	45.1744	60.1556
Cg14480	0	1.45726	0.0304157	0.029047	0
Cg14490	5.44247	6.09434	3.74755	2.02659	0.420995
Cg14491	2.81788	0.594395	1.59169	1.70615	1.83721
Cg14497	17.0501	9.83058	10.5891	1.76457	11.3107
Cg14517	0.059356	0.577014	0.0769587	0.195662	0.179578
Cg14520	0.328475	1.16585	0.273452	0.341799	0.433858
Cg14525	1.26392	2.77023	1.15301	2.63484	1.03005
Cg14531	0.34765	0	5.37485	5.3802	1.0361
Cg14532	1.35858	1.7973	0.613901	2.07579	2.96572
Cg14544	214.191	150.307	384.751	201.901	143.972
Cg14547	1.62061	0.588458	3.74362	2.0393	1.50645
Cg14557	0	0.200272	0.0954077	0	0.197922
Cg14575	8.87792	8.61522	3.6756	6.27861	2.93084
Cg14604	0	0	0.779091	0.715056	0.135476
Cg14609	11.4048	21.5135	14.6694	3.00964	17.0764
Cg14612	1965.88	3360.29	1020.83	519.65	2033.58
Cg14613	0.0755284	1.29824	0.0811726	0.410256	3.23812
Cg14621	0.0515832	0.0576288	0.149618	0.133766	1.21014
Cg14624	0.208814	0.10499	0.126753	0.406354	4.19812
Cg14632	3.76492	0.8036	2.15802	4.01204	2.78543
Cg14633	0.385757	1.7044	0.253245	0.127595	0.167306
Cg14638	11.943	4.80454	27.7916	5.14922	9.64053
Cg14643	0.956258	0.316687	0.45243	1.20264	0.142216
Cg14648	6.96732	17.2041	5.64213	3.13925	10.9577
Cg14658	0.300123	0.316254	0.295763	0.0460565	0.497093
Cg14671	481.94	250.376	500.476	268.411	290.55
Cg14672	4.18572	13.1883	9.80601	10.8053	48.3534
Cg14675	3.13972	3.7904	3.83052	1.39703	5.98622
Cg14701	3.46195	8.64329	2.78434	2.18355	12.1739
Cg14705	1.16413	3.23722	1.28749	3.7731	13.1554
Cg14715	1.66226	3.51235	1.36036	1.71933	1.44329
Cg14734	0.0464998	0.0618104	0.288673	0.611909	0.0179542
Cg14737	0	0	0	0.0405137	1.7289
Cg14766	0.0993149	9.63871	7.05132	10.5084	33.3149
Cg14767	4.04137	22.468	8.26332	3.22732	5.68567
Cg14773	4.36713	4.43704	11.4319	2.29434	3.21182
Cg14775	44.9274	40.2605	163.454	57.1298	46.9928
Cg14781	0.76207	2.21892	0.348247	0.872387	0.151575
Cg14791	7.30172	5.92431	18.7193	3.19983	11.8271
Cg14793	1.62346	3.02521	0.974157	1.45956	1.25959
Cg14799	0.535678	0.121285	1.61098	0.0243753	0
Cg14806	4.28296	11.7984	3.93584	20.9765	57.0458
Cg14823	111.656	73.8043	194.828	141.395	162.433
Cg14825	72.6721	53.6009	107.31	41.1028	42.7837
Cg14829	0.126298	0.176799	0.329315	0	0.573984
Cg14830	211.25	121.309	447.75	132.788	122.36
Cg14835	2.54518	7.44648	2.73892	19.4826	14.313
Cg14839	0.122654	0.157707	0	0	0.279355
Cg14851	1.37285	1.48029	0.56067	0.0636034	1.41671
Cg14869	16.2228	17.9031	5.72294	10.9138	6.64584
Cg14874	6.11723	14.3973	4.86653	8.5418	16.8905
Cg14904	1.92613	4.74793	2.39067	0.863241	7.04119
Cg14907	6.81931	12.3015	23.2232	7.21562	1.83824
Cg14909	2.4639	0.630012	3.06763	2.59703	1.68122
Cg14929	0.173295	0.172095	0.0346328	0.530233	0
Cg14941	0.608223	1.3335	0.499214	4.55289	0.451515
Cg14945	0.793706	3.57981	0.683851	1.65376	1.03176
Cg14958	12.2575	3.77719	7.90975	6.81646	6.31541
Cg14964	21.1365	3.88522	12.083	19.1704	21.5918
Cg14973	14.0503	5.86915	15.0847	14.3533	9.04656
Cg14991	0.591225	1.4672	0.44599	0.316992	0.44369
Cg14998	0	0	0.589009	1.01104	1.38536
Cg15001	135.197	94.5963	203.28	146.177	179.37
Cg15005	2.86425	3.71217	1.77758	3.79739	4.22691
Cg15024	7.36489	11.4262	26.6648	11.435	10.9399
Cg15046	0.830649	2.40416	0.725153	1.84374	1.26939
Cg15057	2.16902	4.72927	1.63491	0.37768	1.88784
Cg15061	0	0.689787	0.179689	0.756259	0
Cg15071	0.392015	2.90487	0	0.149093	0.132411
Cg15076	0	0	0.1376	0.240265	0.497436
Cg15086	0.495588	0.327423	1.6136	0.972092	0.596469
Cg15099	0.954696	1.53749	0.439963	0.507858	0.468784
Cg15119	2.02943	0.283993	1.56165	1.6134	2.25072
Cg15132	27.778	34.0718	49.6985	44.0629	94.8826
Cg15176	0.310862	0	3.77593	0.216683	0.546092
Cg15177	1.04788	2.52113	0.303887	0.933713	6.2187
Cg15178	0.245074	0.111794	2.31908	0.269555	0.282702
Cg15180	24.4234	7.7261	24.953	16.1647	43.8638
Cg15183	19.5495	7.75392	28.6924	11.6414	10.599
Cg15184	1.38376	0.699628	3.05576	0.425129	0.143704
Cg15185	7.3292	9.11943	2.69288	7.41376	5.19744
Cg15198	0.13568	0.955072	0.18356	1.09971	1.45463
Cg15208	0	1.88728	0.14716	0.0525665	0.319998
Cg15217	4.38502	1.81711	3.99217	2.34666	3.22151
Cg15218	19.7412	34.9685	17.0197	21.7539	30.4565
Cg15222	71.3871	21.4649	60.0473	25.2608	21.0999
Cg15243	5.54876	1.51065	3.06367	5.35238	3.42244
Cg15290	0.0907151	0.278811	0.141993	0.165291	2.15979
Cg15318	3.8899	2.11298	6.38825	3.95451	3.85216
Cg15323	1.83036	3.54483	1.28581	2.31655	1.94875
Cg15329	0	0.153883	0	1.01214	0
Cg15334	0.180571	0.0509832	0.756508	0.361602	0.281046
Cg15338	2.85725	8.95758	0	4.27114	1.03094
Cg15339	2.14049	5.28384	0.124965	4.7038	1.49632
Cg15353	39.3457	29.678	12.8156	10.6991	23.6969
Cg15383	4.50545	3.28709	1.65098	3.06289	0.242854
Cg15386	0.0457007	0.0201959	0.0256583	0.973347	0.260393
Cg15393	2.11351	6.15518	2.62513	2.74658	3.35989
Cg15396	0.087433	0.0955762	0.0721081	0.087135	1.24886
Cg15433	1.20445	0.728947	0.818043	1.06575	0.108393
Cg15435	0.037013	0.0658232	0.0214495	0.216815	0
Cg15438	0.369067	0.203275	0	5.67461	0.0849977
Cg15444	7.03667	10.5377	25.9995	6.1931	8.92653
Cg15464	2.03595	0.421091	1.55445	1.42086	1.40283
Cg15503	0.961092	2.09026	0.50727	1.51389	1.00029
Cg15516	2.33324	0.833266	2.33469	2.46274	2.86589
Cg15518	0.917122	1.82122	1.65665	3.15043	1.08646
Cg15519	8.36311	2.2458	9.14054	8.62499	4.61943
Cg15520	9.68492	0.976255	2.4326	5.25135	3.47209
Cg15525	0	1.04988	0	0.124129	0
Cg15538	16.3987	10.7604	25.3296	21.5992	16.9874
Cg15559	0.679549	0.850057	1.3951	1.60229	4.69071
Cg15565	0.0172527	0.579442	0.122043	0.0337102	1.32336
Cg15574	12.358	9.1439	22.1532	8.42054	9.74785
Cg15575	4.25097	5.76775	21.5298	5.29752	8.18758
Cg15576	0.963176	1.74331	0.808114	1.03489	1.20338
Cg15596	8.32241	8.67384	3.06347	1.05901	0.710264
Cg15643	1.05484	0.806847	2.36463	2.18036	2.48777
Cg15644	0.730702	0.0929738	0.410499	0.571406	0.801803
Cg15668	0.6614	1.25237	0.370666	0.975673	0.932126
Cg15677	0.918668	2.67412	1.17397	0.108273	1.22058
Cg15693	0.0999705	0.232861	1.13044	0.0499472	0.237854
Cg15694	0	0	0.13956	0.0938644	4.41414
Cg15703	5.03218	8.99442	3.42522	4.19435	4.82563
Cg15721	2.28523	2.83364	3.01145	0.809659	3.45017
Cg15728	25.4529	21.4113	20.9392	45.1624	116.393
Cg15730	41.1608	5.26452	47.6041	47.778	43.1225
Cg15740	0.0887495	2.26134	0.380315	0.503448	0.673757
Cg15751	13.4499	5.03111	12.268	12.2038	9.57811
Cg15757	0.0662099	0.275335	0	0	0
Cg15781	43.4122	65.177	28.4108	18.2629	33.5735
Cg15785	6.87928	3.36117	6.63289	7.34288	6.12225
Cg15786	8.44093	0.246225	2.90501	9.97397	6.29619
Cg15790	6.86009	12.5392	3.64648	5.53188	2.48785
Cg15797	0	0	0.113475	1.15024	0
Cg15806	0.040908	0.0632728	0.0744766	0.00666089	0.179621
Cg15812	3.75282	4.55778	2.11749	2.73601	4.85117
Cg15834	0.0838657	0.309099	0.01132	0.0913624	0.0317402
Cg15845	55.2983	26.9025	76.2555	41.8178	31.2066
Cg15852	2.34988	1.01175	3.47221	4.62913	4.56799
Cg15857	25.0673	20.8508	51.9497	8.8625	9.70352
Cg15858	14.4212	6.7804	17.8279	8.24427	3.45232
Cg15859	1.05862	1.48593	0.396153	0.640558	0.324756
Cg15882	1.68726	2.705	0.296102	8.46904	8.16515
Cg15883	0.375313	0.271478	1.61176	1.5773	1.72314
Cg15885	0.638823	0.502395	0.0445802	0.128733	0.129595
Cg15889	0	0.640764	0.161057	0.0288735	2.46268
Cg15898	1.37453	0.338533	1.63552	1.22389	1.54925
Cg15903	10.0551	4.36574	70.8519	15.4026	14.6002
Cg15904	13.948	5.69627	15.1086	5.10865	3.89947
Cg15920	0.492494	0.580137	1.15085	1.24883	0.195247
Cg15931	0.420052	0.472704	0.373836	0.0189621	0.349076
Cg15946	4.32053	1.46223	3.60433	2.92195	3.12985
Cg15990	3.53984	6.33212	2.4839	1.43305	1.37937
Cg16009	10.2066	12.364	4.69989	8.05745	6.75699
Cg16011	0.0807691	0.409832	0.0246989	0.0301036	0.0406449
Cg16016	2.39537	2.2578	0.508168	0.813422	0.688042
Cg16026	8.82009	8.73873	2.73986	1.00822	1.62081
Cg16031	0.463816	0.844386	0.0658988	0.313354	0.169594
Cg16064	1.3929	0.384518	1.13321	1.3873	1.35166
Cg16065	0.147708	0.237273	0.419686	0.786374	0.0548171
Cg16066	0.966497	0.927957	0.755802	1.01511	0.0113604
Cg16068	2.26837	1.91857	1.66458	3.95417	1.08356
Cg16073	1.6908	2.55514	0.759437	1.16003	1.44083
Cg16084	0.272879	0.47155	0.303105	0.196395	5.02662
Cg16097	1.04655	15.433	1.14499	14.9272	9.28833
Cg16104	3.43243	5.11599	11.3044	5.30399	6.9714
Cg16110	5.62736	8.93894	3.17064	5.29081	4.18988
Cg16112	1.59218	0.538082	1.65514	1.65566	0.206283
Cg16131	3.13292	2.56302	0.159893	2.07064	1.35821
Cg16134	0.861963	0.359947	1.05603	1.85211	1.07984
Cg16138	5.64265	7.46173	2.26155	3.68182	3.3889
Cg16153	319.781	155.11	430.503	134.563	122.673
Cg16154	0.109054	0.942289	0.388337	0.0252506	1.64568
Cg16156	0.564389	1.0015	0.756047	0.0203709	0.470735
Cg16163	1.15194	0.05944	1.7989	2.04141	0.310646
Cg16164	3.94155	0	3.87294	0.365554	0.0846647
Cg16165	47.3909	3.0959	32.4807	34.8986	12.182
Cg16166	33.8485	3.91512	18.5172	7.29133	7.49305
Cg16170	0.596252	0.308464	1.13971	0.39402	0.386327
Cg16185	0.217372	0.360154	0.0295405	1.79583	0.335768
Cg16186	8.11603	16.6555	7.62297	15.9321	9.00887
Cg16205	83.2362	104.464	258.828	339.609	526.305
Cg16208	37.7918	42.2873	10.7449	8.7413	15.5017
Cg16209	1.65578	3.99567	1.06932	0.283916	1.14385
Cg16211	1.91989	2.82564	0.980899	1.08554	0.654082
Cg16219	0.028369	0	0.0888101	1.1698	0.0335451
Cg16223	0.103881	0.119989	0.0950965	1.35161	0.0907292
Cg16229	0.0356515	0.707871	0.104647	0.0232199	0.739435
Cg16260	20.1482	29.0221	13.866	16.3719	14.8641
Cg16270	1.62	1.22095	0.133397	1.77098	0.495578
Cg16280	1.51001	1.24666	3.13496	0.944643	3.1923
Cg16281	14.4465	12.5258	32.8817	15.4976	15.9007
Cg16284	6.8417	41.5706	9.7287	26.3123	45.4829
Cg16285	9.33224	2.35176	7.05513	6.96528	6.98175
Cg16294	43.0165	28.6761	62.5927	51.7174	14.1158
Cg16325	2.5668	3.59627	1.44801	2.46516	2.0954
Cg16341	2.96877	2.21004	0.233218	0.0479298	0.371369
Cg16350	0.263761	2.28202	0.399546	0.639226	1.21582
Cg16352	0.351598	0	0.548746	1.69323	0.0697006
Cg16359	0	0.00612314	0	0	0.147606
Cg16361	0.310683	1.57532	5.75572	0.103571	0.0648099
Cg16368	0.0445904	0.332766	0.0727138	0.00968062	0.522628
Cg16371	2.97892	3.26217	1.41673	1.88014	2.2753
Cg16372	1.25683	3.45326	1.06305	3.78147	2.6953
Cg16380	0.58823	5.76978	0.990522	3.30296	1.21489
Cg16391	0	0.810332	0	0	0.899163
Cg16420	1.78826	4.93471	3.25226	16.8638	70.6942
Cg16424	0.338499	0.0598352	1.48234	0.05687	0.785993
Cg16432	2.36294	3.302	0.997762	1.07466	0.861751
Cg16434	1.84677	0.582168	0	2.24477	0.952556
Cg16451	164.141	61.7119	680.646	508.759	88.4673
Cg16453	2.52296	4.46142	0.49946	2.0018	2.33571
Cg16454	0.671063	2.50828	1.94726	0.205738	3.52363
Cg16472	0.130666	0.37312	1.22776	0.141556	0.0945114
Cg16510	11.4036	12.5444	5.64595	6.34813	3.02743
Cg16524	25.6752	34.5384	16.0656	25.4169	28.1539
Cg16527	0.427027	2.95389	0.547116	0.256238	0.525345
Cg16536	3.10321	8.37242	3.63375	7.09969	7.68456
Cg16543	1.19084	2.78772	1.1448	5.35156	9.09325
Cg16550	1.9941	0.805931	0	0.0856891	0.46737
Cg16558	1.9369	5.59906	1.53611	3.92202	2.74049
Cg16566	0	0.254572	5.9689	0	0.0521382
Cg16573	10.7615	9.88544	29.1899	9.00166	4.90082
Cg16579	1.71159	1.49992	1.94173	2.56235	11.4362
Cg16585	39.419	5.21851	21.8782	16.825	16.7627
Cg16601	0	0.397817	0	0	2.2102
Cg16619	39.4499	44.2617	97.1637	16.8073	22.6233
Cg16621	268.546	227.565	487.01	181.219	227.79
Cg16626	2.87855	7.79585	3.33842	4.68293	1.71011
Cg16643	0.0434562	0.434372	0	0.0734924	0
Cg16644	1.95554	0.969523	7.24982	0.946008	7.22223
Cg16658	4.44427	14.3993	6.27487	10.294	13.3192
Cg16675	0.260153	0.566699	0.0782146	1.35401	0.265654
Cg16684	1.27762	2.02453	7.41931	1.55478	1.44884
Cg16689	76.0603	34.2706	68.6732	51.8562	61.2608
Cg16710	2.39849	5.60316	4.17934	2.84262	10.3162
Cg16715	0.292682	1.80452	0	0.23661	0.553053
Cg16722	0.997245	1.06416	2.18648	0.508587	2.79922
Cg16732	5.65674	0.218483	1.8386	0.955696	0.990792
Cg16733	0.316425	0.164334	0.934084	1.85483	0.105013
Cg16736	0	0.0201401	0.0851869	0.0868771	1.36831
Cg16741	0	1.41316	0.205095	0.0477646	0.059714
Cg16753	0	0.867694	0	0.0328495	0
Cg16785	23.5171	26.8367	106.002	23.4456	12.8268
Cg16803	13.1136	5.52704	11.0849	13.5518	11.8656
Cg16819	0.130163	1.10578	0.1233	0.124431	0.167124
Cg16835	0.384774	0.672209	0.345499	2.95901	31.3285
Cg16873	42.5135	18.4044	37.7768	34.8265	36.5137
Cg16877	12.5051	4.36842	11.4251	13.1292	11.7782
Cg16889	24.9333	10.3361	22.74	16.8809	13.7009
Cg16890	31.7389	29.5133	21.2779	71.4441	21.1849
Cg16898	0.970292	2.38775	2.41178	0.948536	3.93644
Cg16901	5.59818	11.468	9.65133	4.35093	10.7122
Cg16945	124.67	46.1318	553.128	116.851	224.55
Cg16962	1.69185	0.0932656	0.0587478	0	0.550838
Cg16965	37.3742	112.074	26.3714	16.3634	20.7207
Cg16971	46.6223	27.3005	59.341	42.1006	43.4009
Cg16983	0	1.43536	0	0	0.781813
Cg16990	71.0616	33.5775	79.5012	58.8138	50.4719
Cg17000	2.28509	1.55915	3.46763	2.2385	1.06458
Cg17011	3.91624	1.43226	3.16878	2.49911	2.40257
Cg17019	242.429	150.59	377.12	188.409	184.835
Cg17021	5.52383	9.59087	3.29856	7.3946	8.6557
Cg17027	1.30681	2.00099	0.514114	0.799785	1.05642
Cg17036	17.4534	13.0591	25.5526	14.9356	8.02929
Cg17045	2.11343	9.31516	1.52001	0.049436	2.64465
Cg17048	0.277541	0.175996	0.129071	0.734559	0.018095
Cg17049	3.98933	4.9056	34.8481	2.44543	1.36454
Cg17081	1.74944	0.607201	2.44499	1.4867	1.57296
Cg17085	2.90911	0.383901	0.578197	0.157938	1.52669
Cg17086	2.84837	7.98131	3.31654	19.6111	4.06743
Cg17107	9.8595	4.79917	9.45791	10.981	7.07162
Cg17121	19.5773	31.669	12.2371	21.0511	32.674
Cg17122	12.2002	29.4286	13.3343	12.0199	18.0068
Cg17123	0.768964	1.08781	0.45955	1.23569	0.793737
Cg17157	224.127	57.0095	66.0842	59.9602	16.0731
Cg17163	11.9793	30.6735	9.71469	30.4828	23.9035
Cg17165	10.3475	10.4817	4.33339	9.80033	11.9333
Cg17171	1.19583	3.95546	1.20631	1.20632	4.26057
Cg17177	1.48975	3.2467	0.979954	5.09447	2.152
Cg17178	0.111955	1.21141	0.0261201	0.823466	0.0515804
Cg17179	13.9384	12.5303	41.0048	18.9207	16.5109
Cg17194	7.67874	15.6288	8.08138	12.7766	3.59032
Cg17195	2.872	2.02331	6.19814	3.24722	2.50354
Cg17201	15.3331	15.0437	41.6777	16.8274	16.0712
Cg17202	5.23961	8.80369	21.8117	9.30059	2.61043
Cg17244	1.18718	0.0387115	2.1679	1.77233	0.608053
Cg17259	0.247296	0.109773	2.56155	2.08147	0.611431
Cg17264	0.740949	0.0433425	0.540294	0.411005	1.52752
Cg17274	0.447506	0.163432	1.19602	0.119445	0.393134
Cg17288	204.959	296.844	468.362	195.081	520.099
Cg17296	7.48017	29.8888	5.77534	17.666	19.1861
Cg17325	0.0507331	0.257603	0.520166	0.36976	3.57231
Cg17327	33.5493	14.5479	31.703	38.376	49.2114
Cg17332	10.1806	8.29533	36.2673	18.2323	20.0627
Cg17339	4.16306	1.40467	3.53619	3.11739	4.90027
Cg17341	2.55721	0.907047	2.28705	0.00908055	1.51233
Cg17376	0.128949	0.0532319	0.466562	0.0457567	0.203057
Cg17377	6.28189	17.8569	350.175	92.4169	17.4836
Cg17385	1.76591	4.81187	1.59569	2.95063	3.56498
Cg17425	11.4508	7.84381	20.289	19.6916	16.4384
Cg17426	1.03561	4.22894	1.65742	1.92041	7.75528
Cg17438	177.232	223.086	81.4117	52.6879	130.683
Cg17439	9.31197	6.13204	13.461	7.68878	10.5336
Cg17446	13.5405	25.4483	11.0198	27.1713	55.2581
Cg17447	3.85189	6.60814	0.886772	17.3021	0.940818
Cg17449	23.0658	22.9357	116.696	48.9417	21.7887
Cg17465	1.52997	2.05238	3.47376	7.91469	1.71513
Cg17468	2.54829	5.54716	0.834284	0.190896	1.7492
Cg17471	1.67842	1.47798	4.19236	0.858581	0.770033
Cg17475	0.166245	1.00208	0	0	0.26519
Cg17481	0.742792	0.87614	0.529785	1.68209	0.161528
Cg17483	0	0	0.479136	0.0793734	0.114499
Cg17488	1.72024	2.00974	0.852202	1.32043	4.67493
Cg17494	1.34135	9.532	1.50285	4.81529	0.188704
Cg17506	3.08013	2.95338	0.901694	3.74895	2.37627
Cg17527	6.16981	22.8364	8.51803	16.9986	12.2457
Cg17547	49.5404	48.0178	131.738	33.3195	17.3895
Cg17559	0.818263	1.04655	0.892082	0.359882	1.33025
Cg17564	0.0875082	0.56957	0.150115	1.49094	0.176406
Cg17583	59.593	60.9948	51.4809	79.03	31.932
Cg17598	1.78016	5.67693	1.77849	7.82612	7.05622
Cg17615	123.732	122.174	297.376	117.84	120.415
Cg17635	0.580244	2.6491	0.357849	1.23491	2.20632
Cg17639	2.25374	0.452965	1.37156	3.04653	3.76621
Cg17645	0.123842	1.00017	0.0734954	0.151961	0.929838
Cg17655	1.1527	2.97858	0.604438	0.737981	0.411311
Cg17665	1.00284	0.593479	0.586158	1.75475	0.56523
Cg17682	39.7804	10.5673	22.8314	21.2703	10.9429
Cg17694	10.6364	5.11101	5.75014	4.64845	1.82143
Cg17698	3.8274	5.36233	1.59298	0.648651	1.05024
Cg17704	2.97137	0.214325	9.58693	6.49096	1.40698
Cg17711	5773.25	5430.62	10886.1	3085.19	1965.24
Cg17715	1.22396	31.7359	37.7503	9.80169	2.39902
Cg17727	3.4229	8.37842	3.60727	4.27354	7.71451
Cg17743	0	0.732407	0	0.712127	0.605551
Cg17752	9.65284	20.8491	9.9443	4.47288	4.84183
Cg17766	0.215433	0.80169	0.155934	0.653913	1.02876
Cg17770	0.0995016	0.427581	0.0865305	2.61823	20.1572
Cg17772	0.970145	0.457988	0.55887	0.363179	1.34252
Cg17774	0.475942	0.512259	0.10163	0.0551761	0.249167
Cg17776	1.4516	7.29852	0.919518	0.500443	0.85842
Cg17783	9.04096	1.41292	2.70237	6.5255	1.99899
Cg17790	4.30853	8.11673	3.23731	6.90063	7.34276
Cg17802	5.02113	1.10244	2.43339	2.02707	1.86968
Cg17815	66.9055	30.5396	73.1596	25.5094	37.7804
Cg17816	17.6859	7.98353	16.6326	10.0389	3.96327
Cg17817	9.59708	30.839	10.3043	23.8496	24.1339
Cg17819	1.77568	1.86923	1.12587	0.89805	2.56008
Cg17825	0.917229	3.91613	0.782002	0.316731	0.802749
Cg17846	4.46302	6.37538	2.17872	1.33069	2.24287
Cg17866	1.70103	0.703688	1.89057	0.897059	0.429619
Cg17877	0.674901	0.280437	0.502258	0.0662794	1.00357
Cg17892	2.13154	3.24902	1.3431	0.725362	0.413083
Cg17908	0.00966308	0.533109	0.25503	0.190243	5.03357
Cg17909	0.179346	0.162324	0.544422	0.883646	0.0156502
Cg17912	2.88723	4.93278	0.769052	0.89284	1.81846
Cg17917	5.24724	12.6628	5.06473	11.1491	13.4599
Cg17922	0.773831	0.1278	0.738965	0.97233	0.0790869
Cg17932	3.24492	2.4039	6.85948	5.29863	6.49986
Cg17968	0.638158	3.6768	1.04225	1.97163	5.4808
Cg17973	80.8441	20.1601	47.6717	37.5378	34.5674
Cg17983	1.45888	2.75932	2.11234	0.0173846	1.42902
Cg17986	4.77244	4.31239	11.4692	2.37124	4.88416
Cg17996	54.5487	27.685	60.0053	19.6894	31.3519
Cg18008	0.927883	0.595745	2.64089	24.715	79.0955
Cg18013	0.19148	0.51894	0.284874	11.8248	0.443269
Cg18026	5.00608	23.7648	7.96046	16.1734	11.5439
Cg18028	27.6291	231.671	76.8568	134.204	138.076
Cg18040	0.999007	0.959151	0.927558	0.554809	1.57286
Cg18052	0	0	0	0.141296	2.66776
Cg18062	4.64319	7.72162	6.30503	3.72189	13.5911
Cg18079	2.93389	10.7078	5.60519	3.20543	10.9779
Cg18087	0.0358815	0.143464	0.028455	0.0143535	0.702115
Cg18091	2.71292	7.31948	3.4722	4.74745	6.29244
Cg18098	2.02258	8.12197	2.91784	2.4115	4.60174
Cg18104	0	0.00734462	0.308966	0	0.0150423
Cg18106	3.98354	4.69991	2.37439	1.47626	5.18105
Cg18112	1.05365	2.04915	0.616925	1.6934	2.52616
Cg18155	1.27467	0.289725	0	0.641191	9.15552
Cg18177	0.86239	2.46322	1.36267	3.39806	11.5685
Cg18201	3.84176	1.16475	3.66531	3.51243	3.63265
Cg18203	0.0808498	0.278122	0.125447	0.0107807	0.518719
Cg18204	0.183262	0	0.207114	0.354758	0.222046
Cg18216	2.53498	5.47467	1.99995	7.52074	13.6356
Cg18217	1.3122	7.17719	1.00318	5.42319	2.70398
Cg18221	7.15914	6.07739	15.16	7.17672	11.8685
Cg18258	29.9295	12.1325	27.0515	20.7225	24.8971
Cg18271	0.673823	0.325384	2.39268	0.829453	0.285783
Cg18283	5.40808	1.53426	4.52503	5.35062	4.41048
Cg18287	0	0	0	0	0.471566
Cg18290	11.8362	22.3349	9.34046	23.6519	26.9492
Cg18315	3.47669	8.28682	3.28755	10.329	11.4243
Cg18331	20.0073	38.1162	17.5341	24.1036	24.2147
Cg18339	727.889	408.886	1211.94	174.289	244.927
Cg18341	0.0173015	0.952463	0.11739	0.0161664	0.0685968
Cg18354	10.1304	21.8786	9.56073	15.1891	30.2916
Cg18356	0.934978	0.396729	1.92577	0.490368	0.610823
Cg18398	1.91606	5.89155	0.578247	0	3.67529
Cg18415	1.81433	16.753	4.53589	41.6354	54.9963
Cg18427	4.63588	1.78809	4.53884	2.50868	8.96581
Cg18428	5.68645	1.3685	3.83277	3.17668	0.828634
Cg18437	72.4586	29.8176	58.9568	28.2889	18.8225
Cg18441	125.575	63.2121	156.476	69.5693	87.7097
Cg18478	0.809784	1.04222	0.512214	0.53587	2.24175
Cg18507	6.69918	2.39181	6.56226	8.07	7.90848
Cg18512	47.7424	28.8417	61.7456	18.7728	16.7357
Cg18517	0.41816	0.751271	0.200258	0.180193	0.220201
Cg18522	146.639	42.0962	101.411	46.8575	37.3363
Cg18533	0.0409437	0.646807	0.0245167	1.69752	4.79621
Cg18536	7.82116	2.67159	6.20163	9.02925	9.50271
Cg18552	0.715534	4.18643	0.111884	17.7209	165.013
Cg18571	10.7352	15.8219	3.60138	9.86823	12.2725
Cg18573	4.10299	5.20292	17.2905	7.03407	25.2588
Cg18589	5.04423	5.98115	1.78843	35.9824	6.82327
Cg18604	3.03404	3.97073	1.52762	3.62672	2.86587
Cg18608	63.8938	36.1185	71.2115	30.341	29.1227
Cg18619	0.520099	1.97968	1.3829	0.117803	1.33913
Cg18624	3.02425	6.40027	6.22461	10.418	3.43659
Cg18628	0.487142	4.07118	0.683253	0.0127792	0.171724
Cg18630	0.0737303	1.82328	0.298549	0.0204861	0.0348731
Cg18631	0.361301	1.4148	0.16449	0.00694655	0
Cg18639	24.7273	57.1992	19.5068	34.923	18.0767
Cg18640	5.12274	2.8326	6.96877	5.81852	7.79301
Cg18665	0.363142	0.0280772	0.463726	0.470963	0.379049
Cg18675	19.3211	6.63793	15.9461	12.6209	16.179
Cg18686	7.53681	33.972	11.4329	38.7515	68.408
Cg18692	3.7543	9.74736	4.5963	1.85541	1.74069
Cg18702	0.4795	1.53091	0.845391	1.71339	4.09502
Cg18707	1.24196	2.54181	0.50203	2.94257	1.4374
Cg18711	1.60169	2.55793	0.54952	0.383151	0.642032
Cg18712	0.456145	0.0241497	0.14179	0.867081	0.106648
Cg18716	3.13032	4.89037	1.16634	3.64459	7.61636
Cg18735	7.90592	16.052	7.16287	6.01001	19.9921
Cg18738	0.339964	0.0478022	0.0199523	1.80634	24.3164
Cg18745	0	0.0441531	0	0.186562	4.55807
Cg18750	8.96641	12.3375	4.75802	4.94508	7.02023
Cg18792	28.5706	13.9748	29.2435	25.9952	27.1992
Cg18800	335.431	459.559	226.446	364.348	1079.25
Cg18801	1.83405	0.915008	1.13346	5.8296	1.15952
Cg18804	32.895	132.648	69.757	34.8348	83.8801
Cg18805	0	0.892263	0.0719015	0.107945	0.312783
Cg18815	8.27797	2.11548	9.21551	8.09257	11.0652
Cg18816	9.791	5.4219	10.5994	8.44667	6.43632
Cg18819	6.57674	10.4003	8.92139	5.60471	14.1496
Cg18821	14.6319	36.6933	16.8454	33.2752	66.3522
Cg18822	2.85286	4.26129	1.74447	3.13925	2.35899
Cg18823	2.06175	2.88031	1.09038	0.842676	0.454746
Cg18834	2.56958	2.6782	1.07345	1.40017	2.18673
Cg18851	0.249509	0.256719	0.0121974	0.218233	0.0823937
Cg18878	20.9223	7.79205	27.5883	23.6837	9.07304
Cg18880	1.9627	0.22029	2.2059	0.0801982	0
Cg18889	0.998234	4.62348	1.12705	5.39462	3.99364
Cg18894	1.99689	3.16175	1.48556	2.59863	2.96105
Cg18897	2.52221	9.72352	2.30377	3.20182	2.63608
Cg18899	1.20595	1.21394	0.365256	0.685855	1.0054
Cg18901	0.0879595	0.888689	0.0961977	0.270069	0.10735
Cg18905	70.9288	49.4601	104.039	63.116	72.9404
Cg18915	22.0069	31.4154	12.0831	11.7554	13.1535
Cg18920	2.63152	6.03343	1.6773	10.273	7.19003
Cg18922	0.353625	2.59987	0.502623	0.352603	0.990184
Cg18924	2.04368	4.35047	1.25727	0.356435	1.22177
Cg18930	0.306165	1.29517	0.101551	0.493552	0.358584
Cg18932	0	1.23958	0.0188884	0.0517806	0.0793764
Cg18937	7.7222	32.1106	6.56631	38.393	16.6787
Cg18942	0	5.44587	0	0	5.59958
Cg18943	34.8168	4.69583	11.61	12.8539	18.2558
Cg18944	2.34541	9.56647	1.77255	1.8347	1.94666
Cg18953	5.87252	9.2398	4.13477	2.9514	6.06094
Cg19005	1.84196	1.03105	2.29321	1.64684	0.951653
Cg19009	5.85798	16.2346	4.97372	12.1982	10.5783
Cg19018	1.57082	2.50272	0.622285	0.289753	0.476898
Cg19030	1.39809	1.92717	0.536478	0.18971	1.16308
Cg19070	1.01628	0.381041	1.17123	0.70439	0.952454
Cg19080	0	1.10445	0	0.0160797	0.0670348
Cg19085	39.8604	25.2427	83.4396	40.0261	53.9732
Cg19093	0.860475	1.29413	0.34355	1.09588	0.382441
Cg19099	7.21342	2.16191	5.4055	9.1363	9.28441
Cg19101	5.36013	14.3964	5.85713	13.2189	10.207
Cg19124	3.58158	13.0785	5.11164	3.75165	1.94291
Cg19133	0.543281	0.302247	0.412452	0.658235	0.204405
Cg19154	0.0379046	0.444827	0.778994	0.833361	0.0187855
Cg19161	39.4304	64.6099	25.4001	30.9782	27.1156
Cg19162	0.425814	0.988885	0.15767	0.244086	0.288016
Cg19166	18.3559	34.0119	15.2768	100.177	64.1027
Cg19178	0.12715	2.65815	0.538385	0.0937007	0.0812059
Cg19180	1.6279	0.378768	0.49397	3.31647	29.258
Cg19196	37.315	13.4182	38.6081	33.4433	73.5482
Cg19199	0.21746	9.81557	2.51894	4.41062	4.26418
Cg19205	0.581422	1.49565	0.58854	1.50625	2.27876
Cg19223	9.45702	15.796	9.32233	8.02506	16.8305
Cg19230	0.240753	0.685716	0.456555	5.84867	0.88314
Cg19232	0	0	0.0488837	0.0318664	0.435487
Cg19241	0.097224	0.99744	0	0.0900462	0.0625658
Cg19268	1.6015	1.02842	2.83619	2.90776	1.42325
Cg19270	0.221973	0.308898	0.364434	1.03647	0.0319324
Cg19304	0.959305	1.85026	3.29091	5.07474	0.589477
Cg19312	0.51156	0.46223	1.17209	1.69667	7.4333
Cg19332	4.50154	1.62981	8.22348	3.00763	3.97044
Cg19334	14.5841	11.4903	37.6195	23.1155	21.7227
Cg19337	0.531062	0	0.723786	0.154877	0.421037
Cg19369	4.46871	8.45549	3.6327	4.27257	9.31525
Cg19372	0.269506	3.61363	0.58049	0.741597	0.482846
Cg19378	7.75778	18.7787	4.6851	4.11037	4.26537
Cg19383	94.231	61.974	141.336	132.114	99.5052
Cg19385	2.91613	1.02713	0.161817	0.0150701	1.05109
Cg19389	12980.8	7244.31	14787.9	18844	16361.4
Cg19393	373.298	174.622	372.789	123.944	157.403
Cg19398	2.76608	0.841005	4.41465	0.845112	0.559411
Cg19414	1.65953	2.83053	1.18191	1.32001	2.18959
Cg19416	2.29033	5.38916	2.19497	3.69081	2.95822
Cg19422	0.631516	2.27293	0.824231	0.826058	0.807587
Cg19429	7.16885	10.842	3.12715	1.15859	5.94137
Cg19433	1.8536	2.31582	0.825341	1.07424	0.953504
Cg19436	3.1083	6.75354	4.72257	7.5693	21.6925
Cg19453	75.9694	34.06	75.7228	60.7039	41.6464
Cg19459	11.2448	5.74722	15.0475	5.28933	4.48618
Cg19464	65.6428	54.3937	138.149	33.2849	27.5726
Cg19471	0.344656	0.24079	1.18467	0.250623	0.279994
Cg19475	3.86803	7.52469	3.37712	3.25213	14.5559
Cg19480	0.567507	5.49455	1.0408	6.44871	5.63501
Cg19491	8.99222	3.04467	7.17379	4.51997	7.34746
Cg19497	3.69967	7.64972	1.96389	48.5917	106.194
Cg19498	10.7375	19.2519	9.20361	10.6669	15.6381
Cg19501	26.5785	7.22621	16.4121	15.6407	10.7573
Cg19517	3.60823	1.84937	4.39211	5.41335	4.76099
Cg19523	8.62842	8.82403	39.7046	16.6979	13.0528
Cg19532	7.77367	17.6431	7.7669	3.71575	4.90042
Cg19533	1.82666	0.95448	1.51606	0.917335	2.20091
Cg19539	2.74588	11.2176	36.0451	8.98198	6.13792
Cg19543	0.0492576	3.58235	0	0	0.0668729
Cg19546	97.1335	33.9672	78.79	44.8648	47.7262
Cg19554	0	2.47036	0.438913	1.5302	0.886867
Cg19565	0.260128	0.144096	0.236137	0.0130572	0.605322
Cg19570	0.0741664	0.358021	0.0538552	0.0121834	0.250894
Cg19583	75.9375	25.0947	96.4736	25.1422	18.9546
Cg19595	13.151	4.79044	15.956	13.2094	8.45373
Cg19596	1.17376	9.47656	1.78862	12.6392	7.13954
Cg19603	14.6182	9.07422	23.6348	22.5965	22.7532
Cg19605	0.492435	2.17103	0.460312	0.310589	0.673316
Cg19606	4.53771	6.15852	1.99758	0.787539	1.8324
Cg19614	0.0506133	0.362595	0.261782	0.0134978	0.629082
Cg19626	0.318876	0.238221	0	0.712055	0
Cg19632	8.53047	14.9634	10.3621	5.05368	22.2339
Cg19635	23.6465	9.36141	40.3237	11.8851	13.7804
Cg19636	37.0424	30.3045	74.1508	27.2865	17.2983
Cg19648	2.84561	8.33802	4.64826	2.70229	16.882
Cg19661	90.0442	76.3021	88.0908	51.1083	108.376
Cg19670	48.7594	53.6439	359.83	181.666	434.052
Cg19673	44.9172	139.176	46.9071	74.6525	199.922
Cg19701	4.80684	0.359852	2.09571	4.39182	1.30796
Cg19702	1.46945	3.02057	0.983744	2.41092	3.32192
Cg19705	9.361	5.17871	11.2832	15.8352	12.9091
Cg19722	0.252328	0.232665	0	0.138147	0.388496
Cg19723	0.78486	3.94192	0.203117	0.62791	1.50866
Cg19728	0.154421	0.0693219	0.329625	0.339809	10.1051
Cg19729	0.0257692	0.512049	0.258549	0.240481	8.66557
Cg19755	0.63591	0.241721	0.796354	0.994712	0.832052
Cg19758	45.7079	15.9123	101.546	32.9325	13.674
Cg19759	255.474	158.579	458.193	214.385	245.663
Cg19794	1.88312	0.475171	0.199473	0.0481183	1.20628
Cg19799	3.38738	8.73725	1.32885	1.52614	2.88954
Cg19800	0.857169	6.00407	0.552818	0.781965	3.13676
Cg19823	3.0303	10.2951	4.34634	1.95169	1.55925
Cg19844	3.4429	7.47365	2.22769	1.90271	3.10795
Cg19850	0.616068	0.230164	0.559887	0.558005	0.0655538
Cg19877	0.0767901	0.0843577	0.512316	0	1.7859
Cg19893	0.507742	0.762782	0.743446	0.173964	2.35251
Cg19894	1.21752	1.6522	2.42017	0.156577	5.68992
Cg19909	8.12183	5.25193	12.6037	7.63711	11.9741
Cg19930	9.52136	14.3169	6.00137	2.24768	4.80577
Cg19932	2.88666	4.1706	0.538678	2.15296	3.10405
Cg19945	12.1842	2.62225	10.5204	4.81341	5.8127
Cg19954	16.467	8.97888	32.0972	18.6787	16.9039
Cg19964	21.7423	6.45179	14.6373	8.00349	10.023
Cg19991	58.578	19.0015	49.1683	22.564	35.7881
Cg20006	10.9694	8.59301	19.4789	14.0888	18.372
Cg20014	0.245979	0.0211711	0	0	0.390212
Cg20027	12.7763	8.35761	16.9308	15.3422	19.6587
Cg20033	42.2702	17.0666	49.8182	28.2096	32.6003
Cg20038	6.6211	6.0002	10.8381	2.02486	10.451
Cg20051	57.3043	45.8546	96.1663	34.2975	51.0544
Cg20072	79.1826	17.6371	84.8762	20.5005	4.63688
Cg20081	2.18584	1.53748	7.17409	1.54238	1.93061
Cg20083	0.151745	0.432809	0.296126	0.0900709	0.603119
Cg20090	82.103	32.0877	96.1236	58.0225	71.1767
Cg20091	0.509607	0.798523	6.35433	1.3011	1.12392
Cg20107	8.65908	1.98759	7.56829	1.65089	1.73688
Cg20116	0.357489	0.0270085	1.7241	0.159223	1.97634
Cg20120	1.9805	4.8839	23.1005	1.64099	0.861574
Cg20121	4.85484	9.63096	3.71189	10.3962	6.31683
Cg20136	26.4135	28.2705	55.3684	40.8278	33.0421
Cg20140	3.10848	1.01061	6.30734	2.59078	1.59608
Cg20168	10.3135	6.42825	14.3309	7.42104	7.13235
Cg20184	12.7149	6.83035	13.7055	13.4387	12.1682
Cg20186	19.4663	9.8349	19.1836	20.4703	19.5946
Cg20228	5.13891	3.16511	16.5839	5.56052	2.85985
Cg20241	69.4209	30.2969	59.6151	39.026	39.9152
Cg20245	3.06683	9.48335	2.27753	0.994687	4.48692
Cg20254	1.20672	2.21232	0.433368	0.470971	1.39208
Cg20261	0.0839034	0.0425601	0.139904	0.190982	1.0436
Cg20268	9.21123	4.04389	9.14919	10.8046	8.16312
Cg20269	34.0763	11.3588	36.2977	10.8649	10.6705
Cg20281	9.28163	5.21978	10.2716	5.62692	4.2553
Cg20293	0.884568	1.25543	3.70673	1.8137	1.58771
Cg20296	1.10632	2.30254	0.935073	0.544692	0.558916
Cg20299	0.122537	1.76287	0.799831	0.0645512	0.688759
Cg20300	2.84607	0.729259	2.19354	2.1038	3.53916
Cg20308	10.8914	10.5348	3.58659	5.61945	4.31483
Cg20313	5.00799	3.31351	7.28528	15.0057	5.32009
Cg20317	11.2823	2.67696	7.09623	13.1405	11.482
Cg20336	15.0491	2.37966	6.28283	14.3591	11.9486
Cg20347	93.4575	7.10808	64.4247	84.7567	6.90104
Cg20354	1.05705	1.64423	0.0638055	0.0415117	3.32984
Cg20360	1.66188	4.8636	1.35892	2.75551	5.45844
Cg20381	5.15849	31.0784	9.14943	218.746	359.455
Cg20387	3.91842	6.70215	1.77075	0.804308	1.77997
Cg20392	7.10021	5.76731	2.58573	8.12721	4.97952
Cg20396	180.559	46.1984	4.52768	3.69203	3.95882
Cg20399	99.9108	6.39151	1.21976	4.50895	0
Cg20411	15.6017	13.7056	4.4278	11.1907	6.96229
Cg20414	10.4784	27.0211	9.68623	13.6956	14.387
Cg20416	0.0848998	0.182551	0.893829	0.220166	0.184608
Cg20420	0.115208	0.754124	0.325432	3.62651	48.1488
Cg20440	0.133159	0.178445	0.17274	0.506842	0.121179
Cg20457	4.06981	1.20001	3.68188	2.85982	1.68312
Cg20465	0.385932	0.323941	0.884878	0.619125	1.08129
Cg20474	0.549024	0.578647	0.34866	0.0916034	0.937125
Cg20479	11.3879	6.93966	20.0157	16.295	20.1627
Cg20482	33.2365	16.4282	62.8704	56.1445	22.5913
Cg20503	1.85076	0.793743	1.13177	2.14941	0.113997
Cg20532	0.0479609	1.96553	0.197611	0.445818	1.04946
Cg20537	10.3405	5.33963	11.8951	5.20171	5.15961
Cg20552	0.0437611	0.0479602	0.113006	0	1.78626
Cg20567	1.67286	0	2.85932	0	4.15408
Cg20569	1.98762	0.265199	1.27238	0.527504	1.02067
Cg20571	0.530883	1.07343	0.0730774	1.59504	0.233136
Cg20581	15.1072	5.79715	12.5717	11.6445	9.30506
Cg20582	81.9549	45.5339	91.0551	50.1183	32.7104
Cg20600	67.0715	42.9295	130.793	52.6007	74.7462
Cg20605	0.314539	1.05124	0.0218779	1.12676	0.407285
Cg20616	0.349498	0	0.692905	0	2.4247
Cg20618	3.56512	10.8655	1.42623	10.2426	4.84709
Cg20632	5.40285	7.14816	17.2517	0.821928	1.49416
Cg20634	0	0.564517	0	0	3.4244
Cg20664	0.0859738	0.996043	0	0.526838	0.143094
Cg20666	8.21928	13.5583	8.61074	10.8523	31.4895
Cg20676	14.9806	6.55919	23.5725	12.1949	14.9051
Cg20684	3.13565	0.910191	2.26489	2.72501	1.93378
Cg20697	0	0	1.43713	0.0733802	0.0936853
Cg20699	0.96641	1.09473	0.293228	0	4.90364
Cg20709	0.167217	2.78264	0.228088	0.0792049	0.464339
Cg20743	0.511009	0.734235	0.538404	1.2101	0
Cg20746	0.01372	0.189189	0.085963	2.85185	18.9143
Cg20754	10.4443	55.8678	12.8261	5.50287	3.33687
Cg20757	54.8356	21.5179	69.4944	46.8884	66.29
Cg20764	32.2747	67.8637	29.3344	142.395	117.199
Cg20782	4.45051	6.51992	2.89846	2.07993	2.27405
Cg20786	0.917452	1.3754	0.838108	2.6756	0.852757
Cg20788	40.284	86.4669	282.389	100.586	70.1863
Cg20789	13.7707	9.89198	69.3395	15.1469	11.8508
Cg20800	6.07599	81.0839	543.492	143.89	37.5294
Cg20814	49.1706	45.911	144.487	74.9379	60.3814
Cg20832	8.23289	9.03805	8.89348	11.1288	5.04833
Cg20840	61.6081	28.112	31.2347	60.4093	6.74325
Cg20873	64.0799	27.9185	105.667	71.8338	30.3198
Cg20879	5.43813	10.0439	4.0916	3.56099	3.29461
Cg20884	3.89615	0.716683	5.67576	9.64018	0.32028
Cg20916	4.06961	13.0082	3.57521	8.74901	10.1093
Cg20919	0.0410664	6.18693	0.390267	0.25944	0.815938
Cg20946	0.362432	1.00426	0.294589	0.175029	0.218841
Cg20953	13.1535	23.8152	127.204	46.0066	45.5304
Cg20974	0	0.272865	0.124215	0.88904	0
Cg20999	20.2828	14.2408	28.837	10.2127	19.7389
Cg21007	0.607607	0.135517	5.64478	0.332508	0.646835
Cg21013	1.17828	1.14019	0.103618	0.10431	0.236235
Cg21023	10.6266	4.78027	17.6795	15.259	12.8677
Cg21028	14.8159	8.71454	26.6677	10.6622	36.5269
Cg21029	20.4006	21.4694	43.9147	44.9973	34.0018
Cg21035	0	5.97535	1.98697	1.16765	2.86636
Cg21037	5.59209	2.79069	7.75245	3.72658	3.02444
Cg21044	12.8412	9.82607	20.6319	14.1198	11.9816
Cg21046	6.03901	8.62761	2.06996	1.34395	2.5663
Cg21049	5.5936	10.2716	4.10757	10.5267	9.30353
Cg21050	3.5103	3.09578	3.78336	2.78796	6.85663
Cg21060	3.91289	5.95092	0.703322	4.57742	3.71767
Cg21090	80.2796	47.6722	100.994	113.61	122.772
Cg21095	0.578602	2.13512	0.711357	3.16754	3.98443
Cg21100	5.33144	1.68709	6.17611	7.16337	8.67211
Cg21101	0.0539321	0.0169459	0.300399	0.595147	0
Cg21104	1.22775	0.313727	1.22859	0.379709	0.730444
Cg21106	0.997038	0.589221	1.74422	0.792168	1.47813
Cg21115	15.7767	21.6071	10.4551	12.3686	20.4716
Cg21122	0.330138	0.834052	0.246089	0.702121	0.555576
Cg21124	2.78342	11.559	2.40516	1.12402	2.3555
Cg21133	3.71257	6.9057	2.65586	2.8663	2.46261
Cg21139	66.267	37.3769	11.975	29.4292	14.5431
Cg21142	8.16202	2.47129	9.65463	9.81933	4.44469
Cg21155	5.16496	8.08304	2.26215	1.97552	3.77825
Cg21195	3.29245	6.38603	18.7778	5.39401	10.2888
Cg21206	3.36487	3.09105	0.780094	0.620236	1.15475
Cg21213	4.42812	1.28057	3.09531	5.27908	3.93711
Cg21230	0.403361	0.517856	0	0.900417	1.97531
Cg21253	1.01662	2.32687	0.81287	1.59521	1.72924
Cg21255	2.70794	2.95871	1.57309	2.12042	0.545973
Cg21261	0.990776	3.20252	0.573953	0.213561	0.513857
Cg21265	8.74427	4.27478	10.3013	8.86329	19.4508
Cg21273	0	1.0775	0.644692	8.13719	84.5079
Cg21282	9.64339	2.73662	7.41887	39.1774	126.809
Cg21286	0.0470733	0.0681425	0.168181	0	4.54308
Cg21298	6.862	7.03422	4.71552	2.13848	7.55062
Cg21305	13.7082	36.7264	7.58607	9.27501	12.8643
Cg21313	17.0871	48.2351	12.8074	5.06315	0.819585
Cg21352	0.167748	0.612881	0.336597	1.41459	0.222734
Cg21363	0	0.0218499	0.0273894	2.11629	21.1718
Cg21366	1.18465	2.03739	0.544386	1.60795	0.783123
Cg21381	1.86867	3.60192	1.46434	2.17383	3.47064
Cg21390	0.241588	0.0423285	0.372945	0.0503099	0.774431
Cg21394	2.67832	3.0169	3.74415	2.61498	5.31992
Cg21402	0.946919	1.06913	0.390033	1.27854	1.20836
Cg21403	5.94693	19.98	9.2542	8.53419	12.1765
Cg21415	18.9312	44.794	21.5427	23.2177	11.3942
Cg21429	35.4537	39.0569	85.123	24.1694	22.4738
Cg21436	13.394	6.74543	19.3166	11.7299	8.26928
Cg21448	7.08142	11.9874	34.8019	2.38061	2.08325
Cg21453	13.3113	9.00786	20.2792	19.685	17.3039
Cg21457	0.0500638	0.707509	0.0187386	0.120021	0.0949348
Cg21480	1.94729	5.4088	2.01912	0.688125	2.69999
Cg21489	214.789	53.9347	147.292	131.133	65.2849
Cg21503	0.0614982	0.175584	0.0159944	0.0463858	1.11554
Cg21524	0.329889	0.55573	0.157309	0.183373	0.330895
Cg21562	0	0.349886	0.0136427	0.42568	0.0733968
Cg21570	0	0.0273741	0	0	0.645985
Cg21590	14.8415	12.3497	29.0168	29.785	10.8096
Cg21599	0.456564	0.513469	0.382617	0.7937	16.021
Cg21600	1.06846	0.249555	1.46704	1.55824	8.99546
Cg21624	5.8651	13.4831	4.04479	3.83011	4.12398
Cg21656	13.0733	4.40896	10.8041	15.0379	12.8322
Cg21662	160.552	102.736	271.035	130.99	129.935
Cg21692	0	0.0226999	0.208035	0.0647248	0.627999
Cg21700	0.351381	1.48155	0.932536	0.0913886	1.33606
Cg21703	4.35282	10.9986	3.59912	23.8939	31.6771
Cg21708	3.94453	2.36703	17.9337	0.18576	2.14091
Cg21711	1.11231	0.721679	3.83139	20.9557	13.5531
Cg21715	90.2807	6.73595	68.4539	22.0815	115.571
Cg21717	91.6966	92.8086	69.7443	110.583	29.3578
Cg21723	3.26749	6.0221	2.86737	2.23008	2.23322
Cg21744	12.0184	3.78351	10.3201	9.46027	7.91409
Cg21747	2.3041	4.62518	1.44887	5.08921	4.70115
Cg21751	0.305727	1.37675	0.286275	0.04583	0.0532247
Cg21754	0.227289	0.0591835	0.416937	0.16989	0.401332
Cg21771	0.330278	0.863019	0.559727	0.633656	0
Cg21791	0.651992	0.696573	0.783363	0.0707734	1.04993
Cg21792	28.9005	11.6409	37.1347	25.4743	37.901
Cg21812	8.64723	5.98577	11.7919	6.20747	5.82448
Cg21846	17.6681	4.84829	14.646	6.65932	16.7455
Cg21865	96.2983	66.8562	138.14	146.548	135.514
Cg21870	3.06799	0.693841	2.00482	2.22421	1.27639
Cg21879	3.32112	2.08145	3.99614	3.5841	9.63406
Cg21887	3.28297	2.40083	1.96878	1.72608	4.7129
Cg21889	45.8036	32.2698	19.0445	7.17981	28.7179
Cg21890	0.0855599	0.390391	1.1919	0.00899852	0.52769
Cg21909	149.833	453.564	115.463	158.824	96.8568
Cg21914	3317.72	5161.35	3717.78	2257.54	5436.61
Cg21915	567.958	705.406	588.129	312.738	903.675
Cg21940	3.67997	5.7274	12.985	1.89102	1.68262
Cg21943	1.91293	3.81927	1.05303	8.98193	10.3965
Cg21949	0	0.0366335	0	1.9706	0
Cg21950	0.0562374	3.01258	0.31218	0.11464	0.0840103
Cg21953	36.827	16.44	32.2457	26.3908	27.8325
Cg21954	7.46053	4.34632	21.925	13.7149	19.8522
Cg21955	0.317991	0.525087	0.03739	0.250722	0.396744
Cg21958	5.36418	5.86138	1.03395	10.0041	5.5796
Cg21961	7.61408	3.86367	15.8428	8.65939	1.03494
Cg22001	3.12933	0.503293	6.00843	2.4493	5.27756
Cg22010	1.08104	5.18667	1.01049	0.587569	0.496262
[truncated: 1,499 more rows]
