# Supplementary material for: Transcriptome profiling combined with network analysis deepens the understanding of immune response mechanisms in blood of pacific oyster Crassostrea gigas infected by Vibrio alginolyticus
Source: Frontiers journal article supplement (doi:10.3389/fmars.2022.1017445), 2022-09-16
Supplement: Data_Sheet_4.XLSX [file Data_Sheet_4.XLSX]

## Sheet: Sheet1 
Category	Term		Count	%	PValue	Genes	List Total	Pop Hits	Pop Total	Fold Enrichment	Bonferroni	Benjamini	FDR
GOTERM_BP_DIRECT	GO:0007165	signal transduction	94	6.66667	2.55e-05	P49582, P32865, P35659, P46197, O94988, Q6IDD9, P34729, O43559, Q07553, Q7JQ32, P18910, P16066, B4PSS5, O88854, Q96RU3, O88536, Q4R562, Q15262, P46940, P27987, Q18179, Q20929, Q6TLK4, B0JZG0, P52564, Q15822, Q5SSM3, Q1ZXD6, Q61603, P18293, P80177, Q5RID7, Q9NWZ3, Q63421, Q9VX32, P18845, P40199, Q99996, Q02763, P55043, Q14185, P43144, Q7Z6B7, P98174, O14514, Q5XJ85, Q13972, O00329, Q8IW41, Q6R5N8,…	1203	456	8829	1.5129	0.0954922	0.100363	0.100261
GOTERM_BP_DIRECT	GO:0019934	cGMP-mediated signaling	11	0.780142	0.000178	P18910, P29972, P16066, P18293, Q8INF0, P22717, Q02153, Q14432, Q07553, Q7JQ32	1203	21	8829	3.84432	0.504096	0.34603	0.345678
GOTERM_BP_DIRECT	GO:0030317	flagellated sperm motility	16	1.13475	0.000338	Q8TE73, P49582, A4IHB9, Q9JLI7, Q5JU00, Q9UIF3, Q5CZC0, Q0V9S9, Q9NQM4, Q5F201, E9Q8T7, Q3SZH6, P23634, A6H782, Q8BI79, B2RW38	1203	43	8829	2.73085	0.736009	0.34603	0.345678
GOTERM_BP_DIRECT	GO:0007264	small GTPase mediated signal transduction	18	1.2766	0.000435	Q13972, Q6ZSZ5, Q2KJ93, Q16YG0, Q13905, P34147, Q8WZA2, Q8TEU7, B5FYQ0, Q5R9F4, Q9ER71, Q7L0Q8, Q22038, Q14185, P48148, Q9BZ29, Q8IZD9, Q9WVE9	1203	53	8829	2.49254	0.819326	0.34603	0.345678
GOTERM_BP_DIRECT	GO:0008045	motor neuron axon guidance	12	0.851064	0.000458	Q90922, P06602, Q9VEN1, Q8QFX6, Q90476, P20241, P35992, P48148, P98081, Q7JQ32, Q9V4A7	1203	27	8829	3.26185	0.83516	0.34603	0.345678
GOTERM_BP_DIRECT	GO:0016525	negative regulation of angiogenesis	16	1.13475	0.000591	Q7ZVK3, P09917, Q28178, Q24K15, P35590, P35441, P16066, Q02763, P28828, O60242, P28827, P23634, Q6P799, Q99LI8, Q02858, O14514	1203	45	8829	2.60948	0.902301	0.34603	0.345678
GOTERM_BP_DIRECT	GO:0006182	cGMP biosynthetic process	10	0.70922	0.000637	P18910, P16066, P46197, P18293, Q8INF0, P22717, Q02153, Q07553, Q7JQ32	1203	20	8829	3.66958	0.918726	0.34603	0.345678
GOTERM_BP_DIRECT	GO:0007189	adenylate cyclase-activating G-protein coupled receptor signaling pathway	18	1.2766	0.000703	Q08462, P35408, Q95KZ0, Q32ZE2, Q4LBB9, Q9VCZ3, Q8WZA2, C6KFA3, P41233, P32240, O88854, A6QP74, O60242, Q9HAR2, P43114, Q91ZZ5, G3M4F8, O14514	1203	55	8829	2.4019	0.937289	0.34603	0.345678
GOTERM_BP_DIRECT	GO:0071320	cellular response to cAMP	11	0.780142	0.000985	P70549, P56404, P29972, Q28557, Q99996, O94778, Q13905, P05153, P11881, Q9BXS9, S4R2P9	1203	25	8829	3.22923	0.979381	0.431069	0.430631
GOTERM_BP_DIRECT	GO:0006955	immune response	19	1.34752	0.00138194	P35408, Q53G44, Q6R5N8, Q9BDB7, Q8K4Q8, O35186, Q28178, P53567, P58195, P35441, Q13191, P84022, Q9JJ00, Q8BV66, P22366, Q704V6, P43114, P06797, Q13231	1203	63	8829	2.2134	0.99568	0.544069	0.543516
GOTERM_BP_DIRECT	GO:0050728	negative regulation of inflammatory response	15	1.06383	0.00239614	P35408, P49582, Q95KZ0, P08228, P09917, Q04861, Q2HJG5, Q08048, Q02763, P84022, P32240, O88536, P43114, Q4R8W3, P28039	1203	46	8829	2.3932	0.999921	0.857601	0.85673
GOTERM_BP_DIRECT	GO:0007204	positive regulation of cytosolic calcium ion concentration	15	1.06383	0.00299353	P35408, Q95KZ0, O42410, G3V928, Q5XIG2, Q61143, P11881, Q9Z309, Q9PTS8, P32240, O88854, O88536, Q9UH65, P43144, P43114	1203	47	8829	2.34228	0.999993	0.892128	0.891221
GOTERM_BP_DIRECT	GO:0051591	response to cAMP	8	0.567376	0.00317121	Q9JHI0, Q02763, Q16878, Q9VQH2, P05153, Q13490, P36956, Q02858	1203	16	8829	3.66958	0.999996	0.892128	0.891221
GOTERM_BP_DIRECT	GO:0006954	inflammatory response	25	1.77305	0.00340968	Q2KJ63, O02768, O00329, Q6R5N8, Q28178, Q4V7E1, P16444, A8QMS7, P35441, O88536, P43114, Q4R8W3, Q95KZ0, P35408, P80177, Q16878, Q62737, P16109, Q28557, P32240, Q3UPW2, P22366, Q9EQC5, Q704V6, Q5XJ85	1203	100	8829	1.83479	0.999999	0.892128	0.891221
GOTERM_BP_DIRECT	GO:1990264	peptidyl-tyrosine dephosphorylation involved in inactivation of protein kinase activity	6	0.425532	0.00363091	P51452, Q99M80, P23467, O14522, O88488, O13016	1203	9	8829	4.89277	0.999999	0.892128	0.891221
GOTERM_BP_DIRECT	GO:0051056	regulation of small GTPase mediated signal transduction	12	0.851064	0.00406395	Q6ZSZ5, Q7L0Q8, Q5ZJY3, O94988, Q9H8V3, Q9UH65, Q8BQZ4, Q8IZD9, P47736, Q7Z6B7, P98174, Q86X10	1203	34	8829	2.59029	1	0.892128	0.891221
GOTERM_BP_DIRECT	GO:0055091	phospholipid homeostasis	5	0.35461	0.0040794	A8WGS4, Q9Y5X9, P41233, P97564, Q99758	1203	6	8829	6.11596	1	0.892128	0.891221
GOTERM_BP_DIRECT	GO:0042093	T-helper cell differentiation	5	0.35461	0.0040794	Q95KZ0, P35408, P70705, P32240, P43114	1203	6	8829	6.11596	1	0.892128	0.891221
GOTERM_BP_DIRECT	GO:0070588	calcium ion transmembrane transport	18	1.2766	0.00430542	Q9UPR5, Q7Z3S7, Q13507, Q61143, P11881, Q9Z1L5, A7T1N0, Q9HCF6, E9PTA2, S4R2P9, P70549, Q9PTS8, Q91YD4, Q9I8C7, P43144, P23634, Q8TDD5, Q7PPA5	1203	64	8829	2.06414	1	0.892128	0.891221
GOTERM_BP_DIRECT	GO:0050808	synapse organization	12	0.851064	0.00521178	P70549, P49582, Q05546, Q00546, Q9UPR5, Q8BTM8, Q8NFZ3, P20241, Q99946, O35449, Q3UVX5, S4R2P9	1203	35	8829	2.51628	1	1	0.999238
GOTERM_BP_DIRECT	GO:0043154	negative regulation of cysteine-type endopeptidase activity involved in apoptotic process	13	0.921986	0.00546061	P29972, O02768, P29066, Q28178, Q08048, P16444, A9ULZ2, Q9R0I6, P35441, Q24307, Q02962, O62640, Q13490	1203	40	8829	2.38522	1	1	0.999238
GOTERM_BP_DIRECT	GO:0006814	sodium ion transport	19	1.34752	0.00669647	Q9XT77, Q9WTW8, Q9UGH3, Q9Y289, Q8VDT1, A2AJN7, Q9H015, Q9UHI7, Q86YT5, Q12908, S4R2P9, P70549, Q91YD4, O76082, Q5TF39, Q9LKW9, Q7TSF2, Q49B93, Q7SYH5	1203	72	8829	1.93672	1	1	0.999238
GOTERM_BP_DIRECT	GO:0006898	receptor-mediated endocytosis	14	0.992908	0.00680896	P98164, Q9JLB4, Q9UGM3, P98158, Q60997, G3V928, O75165, Q0VCK5, Q9NZR2, O88536, O60041, Q6X0I2, Q8K299, Q6TLK4	1203	46	8829	2.23365	1	1	0.999238
GOTERM_BP_DIRECT	GO:0071260	cellular response to mechanical stimulus	12	0.851064	0.00826421	Q95KZ0, P35408, P29972, Q3ZBN6, P32240, Q62737, P22366, Q04861, A5HNF6, P43114, Q9Z0J4, Q98943	1203	37	8829	2.38027	1	1	0.999238
GOTERM_BP_DIRECT	GO:0006833	water transport	4	0.283688	0.00904551	P56404, P29972, O94778, P55088	1203	4	8829	7.33915	1	1	0.999238
GOTERM_BP_DIRECT	GO:0007196	adenylate cyclase-inhibiting G-protein coupled glutamate receptor signaling pathway	4	0.283688	0.00904551	Q14831, Q13003, P23385, Q68EF4	1203	4	8829	7.33915	1	1	0.999238
GOTERM_BP_DIRECT	GO:0043627	response to estrogen	10	0.70922	0.00950712	P50430, Q2IBC1, Q61602, Q02763, P50429, O95436, Q02858, Q9Z0J4, Q27960, Q9UBL3	1203	28	8829	2.62113	1	1	0.999238
GOTERM_BP_DIRECT	GO:0007254	JNK cascade	8	0.567376	0.00965455	P35408, Q8IVH8, P84022, P32240, P22366, Q9NWZ3, Q04861, P43114	1203	19	8829	3.09017	1	1	0.999238
GOTERM_BP_DIRECT	GO:0006811	ion transport	35	2.48227	0.0104609	P00450, P49582, O70496, Q9VCA2, Q9UPR5, Q99N01, P11881, Q9Z1L5, Q7KVW5, O61715, Q23157, P38993, Q8K299, Q9BXS9, Q15822, Q9UGI6, Q61603, P48542, Q8VDT1, A2AJN7, Q3U2S8, Q61143, P48180, S4R2P9, P30532, Q18120, Q91YD4, Q96BD0, Q03412, Q49B93, Q2HJ10, Q5RFW0, Q3YAW7, Q6PEH9, G5EBR3	1203	168	8829	1.52899	1	1	0.999238
GOTERM_BP_DIRECT	GO:0007154	cell communication	7	0.496454	0.0105113	P70549, Q9UPR5, Q5H8C1, Q9GV77, P06797, S4R2P9, O57409	1203	15	8829	3.42494	1	1	0.999238
GOTERM_BP_DIRECT	GO:0007168	receptor guanylyl cyclase signaling pathway	7	0.496454	0.0105113	P18910, P16066, P46197, P18293, Q07553, Q7JQ32	1203	15	8829	3.42494	1	1	0.999238
GOTERM_BP_DIRECT	GO:0007216	G-protein coupled glutamate receptor signaling pathway	6	0.425532	0.0105181	Q14831, Q13003, P23385, Q68EF4, Q9QYS2, Q3UVX5	1203	11	8829	4.00317	1	1	0.999238
GOTERM_BP_DIRECT	GO:0036159	inner dynein arm assembly	6	0.425532	0.0105181	Q9NQM4, Q8WXX0, E9Q8T7, Q9UIF3, Q8BI79, Q8IWG1	1203	11	8829	4.00317	1	1	0.999238
GOTERM_BP_DIRECT	GO:0070373	negative regulation of ERK1 and ERK2 cascade	9	0.638298	0.0112655	P51452, Q13115, P49582, P41241, P29066, Q13905, P43144, Q86Z23, O13016	1203	24	8829	2.75218	1	1	0.999238
GOTERM_BP_DIRECT	GO:0032496	response to lipopolysaccharide	16	1.13475	0.0126888	P35408, Q95KZ0, P15428, P16109, P34056, Q9Z0J4, Q76EQ0, P20735, P47727, P32240, P16591, Q8VCC1, P22366, P05153, P05186, P43114	1203	60	8829	1.95711	1	1	0.999238
GOTERM_BP_DIRECT	GO:0048661	positive regulation of smooth muscle cell proliferation	9	0.638298	0.0146349	P07943, P35441, Q62737, P22366, A6QP74, Q28178, Q9NWZ3, O15439, E9Q236	1203	25	8829	2.64209	1	1	0.999238
GOTERM_BP_DIRECT	GO:0055085	transmembrane transport	40	2.83688	0.0150914	Q8R0M8, Q91Y77, O70496, Q9VCA2, Q9Y289, P55088, Q99N01, Q5RLM2, Q10901, P11881, Q12908, O61715, Q7RTX9, Q23157, P41233, P70704, O35600, Q99NH7, O15439, P33527, Q9CR58, Q8R4P9, O94778, Q6NT16, Q8VDT1, A2AJN7, Q3U2S8, Q921A2, Q61143, Q54BU4, S4R2P9, Q8BGC3, Q91YD4, Q503M4, Q96BD0, Q8NBI5, Q2HJ10, P52590, Q6PEH9, E9Q236	1203	203	8829	1.44614	1	1	0.999238
GOTERM_BP_DIRECT	GO:0002283	neutrophil activation involved in immune response	5	0.35461	0.0151738	P22366, O55070, F1N9Y5, A5HNF6, Q5XJ85	1203	8	8829	4.58697	1	1	0.999238
GOTERM_BP_DIRECT	GO:0043066	negative regulation of apoptotic process	41	2.9078	0.0160197	P07943, P29972, Q13257, P98158, Q8BTM8, P70345, Q08048, Q9Z0J4, P16444, P35441, Q4TVR5, Q9UDY8, Q9NR09, P84022, Q24307, P23727, O62640, Q14432, Q02858, Q91ZZ5, P98164, Q15468, P08228, Q61602, Q60HG7, Q7ZYI3, P29066, Q9VQH2, P34056, G3V928, Q24K15, A9ULZ2, Q9R0I6, Q9Z1Z1, O08863, Q8NBS9, Q9QUK3, Q02763, Q02962, Q13490, P43301	1203	210	8829	1.43288	1	1	0.999238
GOTERM_BP_DIRECT	GO:0006032	chitin catabolic process	6	0.425532	0.016039	H9J9M0, Q01459, Q04786, H2A0L6, Q9BZP6, Q13231	1203	12	8829	3.66958	1	1	0.999238
GOTERM_BP_DIRECT	GO:0007186	G-protein coupled receptor signaling pathway	38	2.69504	0.016806	Q08462, P32865, Q6ZSZ5, O70497, Q4LBB9, Q920B6, Q68EF4, Q9VCZ3, Q8WZA2, P41233, P16066, O88854, O88536, A6QP74, O60242, Q14432, Q9HAR2, Q20929, Q18179, Q91ZZ5, Q14831, P35408, P23385, Q9Y5X5, P29066, Q9H8V3, P0C0W8, Q9QYS2, Q9WTS8, Q3UVX5, C6KFA3, P41146, Q5D0K2, C3ZQF9, Q8SWR3, P23811, P98174, O14514	1203	192	8829	1.45254	1	1	0.999238
GOTERM_BP_DIRECT	GO:0032757	positive regulation of interleukin-8 production	8	0.567376	0.0174479	P32240, O70497, P22366, F1N9Y5, Q6Q899, A5HNF6, P43114, Q9WTS8	1203	21	8829	2.79587	1	1	0.999238
GOTERM_BP_DIRECT	GO:0044267	cellular protein metabolic process	8	0.567376	0.0174479	P00450, Q9UGM3, Q15293, Q15084, Q9QUK3, O95436, P07686, Q99758	1203	21	8829	2.79587	1	1	0.999238
GOTERM_BP_DIRECT	GO:0001822	kidney development	18	1.2766	0.0192167	P53565, P98164, Q9Y547, Q10751, O75626, P98158, Q61602, P15428, P34056, Q2PZL6, B5FYQ0, Q58CS6, P70403, Q9Y4D7, Q61391, Q8VCC1, Q90476, Q9ULZ9	1203	74	8829	1.7852	1	1	0.999238
GOTERM_BP_DIRECT	GO:2000420	negative regulation of eosinophil extravasation	4	0.283688	0.020327	Q95KZ0, P35408, P32240, P43114	1203	5	8829	5.87132	1	1	0.999238
GOTERM_BP_DIRECT	GO:0071345	cellular response to cytokine stimulus	7	0.496454	0.0204518	Q05209, Q00651, P58195, P41233, P84022, Q9JJ00, Q61391	1203	17	8829	3.022	1	1	0.999238
GOTERM_BP_DIRECT	GO:0060294	cilium movement involved in cell motility	6	0.425532	0.0231961	Q8IYW2, Q96N23, E9Q8T7, Q9UIF3, A6H782, Q8IWG1	1203	13	8829	3.3873	1	1	0.999238
GOTERM_BP_DIRECT	GO:0006979	response to oxidative stress	21	1.48936	0.023602	A6QLY2, P30710, G9JJU2, G5EG78, P08228, O02768, Q9WTW8, Q8LPL3, Q8K4Q6, Q9UGH3, Q8SZ16, Q9VQH2, P35559, Q91YD4, Q68G38, Q9LKW9, Q14191, P09482, P05370, Q9BYN0, Q8BU85	1203	93	8829	1.65723	1	1	0.999238
GOTERM_BP_DIRECT	GO:0043087	regulation of GTPase activity	13	0.921986	0.0243697	O93388, Q5SSM3, Q5BKC9, P08228, Q8TEU7, Q9NGC3, Q9Y4D7, Q13191, P46940, P47736, P98174, Q6TLK4, Q9V4A7	1203	48	8829	1.98769	1	1	0.999238
GOTERM_BP_DIRECT	GO:0032930	positive regulation of superoxide anion generation	5	0.35461	0.024408	P08228, O88536, Q62737, F1N9Y5, Q3U2S8	1203	9	8829	4.07731	1	1	0.999238
GOTERM_BP_DIRECT	GO:0043950	positive regulation of cAMP-mediated signaling	5	0.35461	0.024408	P32240, P05153, P23811, P43114, Q91ZZ5	1203	9	8829	4.07731	1	1	0.999238
GOTERM_BP_DIRECT	GO:0007411	axon guidance	20	1.41844	0.025887	G5EG78, O00329, Q61602, Q96B97, P78509, Q8QFX6, P50549, P35992, P18433, Q7JQ32, Q8N6G6, P18106, Q9VF87, Q96QS3, Q13591, P48148, P47736, Q8K1S4, Q9V4A7	1203	88	8829	1.66799	1	1	0.999238
GOTERM_BP_DIRECT	GO:0045087	innate immune response	37	2.62411	0.026818	O00329, O75626, Q6R5N8, Q6IDD9, O70497, Q9BRZ2, Q9H3Y6, Q9WUN2, Q9U6M0, A8QMS7, Q5RBP9, Q9UDY8, Q24307, Q8CFG8, Q2M385, F1N9Y5, Q8TDB6, Q6DFJ6, Q9UGM3, Q8BFW4, Q62318, Q96PD5, P80177, Q62737, Q8R5F7, Q9NWZ3, V5NAL9, P18106, P16591, P22366, Q6Q899, Q704V6, A5HNF6, P09324, Q5XJ85, Q8N0N3, O14514	1203	192	8829	1.41432	1	1	0.999238
GOTERM_BP_DIRECT	GO:0007565	female pregnancy	7	0.496454	0.0272307	P70705, Q28557, O54750, Q8VCC1, P15428, P08842, P43114	1203	18	8829	2.85411	1	1	0.999238
GOTERM_BP_DIRECT	GO:1904646	cellular response to beta-amyloid	7	0.496454	0.0272307	P33527, Q00651, O88536, P70345, G3V928, Q704V6, Q3UVX5	1203	18	8829	2.85411	1	1	0.999238
GOTERM_BP_DIRECT	GO:0000187	activation of MAPK activity	11	0.780142	0.0272838	P52564, P49582, P08228, P23385, P35441, Q801G2, P29066, Q28178, Q68EF4, Q08048, Q9YGL1	1203	38	8829	2.12449	1	1	0.999238
GOTERM_BP_DIRECT	GO:0007188	adenylate cyclase-modulating G-protein coupled receptor signaling pathway	10	0.70922	0.0284075	Q08462, Q95KZ0, P35408, P32240, O88854, P29066, A6QP74, P23811, P43114, Q9VCZ3	1203	33	8829	2.22399	1	1	0.999238
GOTERM_BP_DIRECT	GO:0051491	positive regulation of filopodium assembly	8	0.567376	0.0288508	Q8CCN5, Q4LDD4, Q9VF87, Q2KJ93, Q8QFX6, O08816, Q1EG27, P11233	1203	23	8829	2.55275	1	1	0.999238
GOTERM_BP_DIRECT	GO:0033138	positive regulation of peptidyl-serine phosphorylation	11	0.780142	0.0323657	P49582, O02768, Q6IMN6, Q2IBC1, Q99996, P29066, Q0VD32, P23634, Q8N122, Q02858, Q9Z0J4	1203	39	8829	2.07002	1	1	0.999238
GOTERM_BP_DIRECT	GO:0007160	cell-matrix adhesion	13	0.921986	0.0329123	Q8TER0, Q5H8C1, B8JK39, B3EWY9, Q27874, Q00651, O08523, Q99102, P26009, P28648, Q02858, A6QLI0, P08962	1203	50	8829	1.90818	1	1	0.999238
GOTERM_BP_DIRECT	GO:0050900	leukocyte migration	7	0.496454	0.0353428	Q00651, P40199, P82251, Q02763, B8JK39, P16109, O95907	1203	19	8829	2.7039	1	1	0.999238
GOTERM_BP_DIRECT	GO:0035094	response to nicotine	7	0.496454	0.0353428	Q15822, P09480, P49582, Q05901, O00180, P09482, P30532	1203	19	8829	2.7039	1	1	0.999238
GOTERM_BP_DIRECT	GO:0019221	cytokine-mediated signaling pathway	9	0.638298	0.0354814	P23471, O00329, Q7L0Q8, P09917, P16591, P22366, Q13905, Q9VQH2, Q9NWZ3	1203	29	8829	2.27767	1	1	0.999238
GOTERM_BP_DIRECT	GO:0030900	forebrain development	9	0.638298	0.0354814	Q7TNK1, P98164, Q15468, P98158, Q5D0K2, Q61602, Q6NVN0, Q9HC56, O97772	1203	29	8829	2.27767	1	1	0.999238
GOTERM_BP_DIRECT	GO:0007229	integrin-mediated signaling pathway	12	0.851064	0.0354835	Q00651, Q2KJ93, P54939, O77633, P26009, F1N9Y5, Q14185, B8JK39, Q27874, P18433, Q9Y490, P26039	1203	45	8829	1.95711	1	1	0.999238
GOTERM_BP_DIRECT	GO:0097242	beta-amyloid clearance	5	0.35461	0.036378	P98164, P98158, Q61391, G3V928, P35559	1203	10	8829	3.66958	1	1	0.999238
GOTERM_BP_DIRECT	GO:0033624	negative regulation of integrin activation	4	0.283688	0.0365745	Q95KZ0, P35408, P32240, P43114	1203	6	8829	4.89277	1	1	0.999238
GOTERM_BP_DIRECT	GO:0009651	response to salt stress	4	0.283688	0.0365745	Q8LPL3, Q9LKW9, Q7JQ32	1203	6	8829	4.89277	1	1	0.999238
GOTERM_BP_DIRECT	GO:0098815	modulation of excitatory postsynaptic potential	4	0.283688	0.0365745	P70549, P49582, Q9UPR5, S4R2P9	1203	6	8829	4.89277	1	1	0.999238
GOTERM_BP_DIRECT	GO:1901222	regulation of NIK/NF-kappaB signaling	4	0.283688	0.0365745	Q9GL21, O08863, Q13490, Q02858	1203	6	8829	4.89277	1	1	0.999238
GOTERM_BP_DIRECT	GO:0001818	negative regulation of cytokine production	4	0.283688	0.0365745	Q95KZ0, P35408, P32240, P43114	1203	6	8829	4.89277	1	1	0.999238
GOTERM_BP_DIRECT	GO:0030728	ovulation	4	0.283688	0.0365745	Q8VCC1, Q4LBB9, P15428, O43903	1203	6	8829	4.89277	1	1	0.999238
GOTERM_BP_DIRECT	GO:0030855	epithelial cell differentiation	10	0.70922	0.0405819	P47727, Q9UGM3, P20073, P20072, Q3UPW2, Q95JD5, P28648, P50416, Q4V7E1, D4A1J4	1203	35	8829	2.0969	1	1	0.999238
GOTERM_BP_DIRECT	GO:0050829	defense response to Gram-negative bacterium	9	0.638298	0.0428119	P29972, Q9UGM3, Q60997, Q5RBP9, Q9V576, Q24307, Q2M385, P16109, O14514	1203	30	8829	2.20175	1	1	0.999238
GOTERM_BP_DIRECT	GO:0071711	basement membrane organization	6	0.425532	0.0429399	Q96RW7, G5EG78, Q2IBC1, D3YXG0, P34056, O43903	1203	15	8829	2.93566	1	1	0.999238
GOTERM_BP_DIRECT	GO:0098703	calcium ion import across plasma membrane	6	0.425532	0.0429399	P70549, Q91YD4, Q9UPR5, P23634, E9PTA2, S4R2P9	1203	15	8829	2.93566	1	1	0.999238
GOTERM_BP_DIRECT	GO:0051897	positive regulation of protein kinase B signaling	13	0.921986	0.0434031	P98164, O00329, P98158, Q6NSJ0, Q28178, Q5XIG2, P35441, Q02763, Q6ZUJ8, O88536, Q13591, Q02858, Q9WVE9	1203	52	8829	1.83479	1	1	0.999238
GOTERM_BP_DIRECT	GO:0007265	Ras protein signal transduction	11	0.780142	0.0444455	Q13972, Q8IW41, Q99MP8, Q90922, Q62318, Q13905, Q8R367, Q8WZA2, Q8TEU7, P11233, Q80U87	1203	41	8829	1.96904	1	1	0.999238
GOTERM_BP_DIRECT	GO:0030866	cortical actin cytoskeleton organization	7	0.496454	0.0448574	P28660, Q9VF87, Q9BIW4, P54939, P48148, Q9Y490, P26039	1203	20	8829	2.5687	1	1	0.999238
GOTERM_BP_DIRECT	GO:0007018	microtubule-based movement	15	1.06383	0.0463009	Q8TE73, Q66IC8, O15066, Q4R918, Q9CQ66, Q9GYZ0, Q8IWG1, Q8IVF4, P21613, Q02224, Q8WXX0, E9Q8T7, Q6NWW5, Q91XQ0, Q9C0G6	1203	64	8829	1.72011	1	1	0.999238
GOTERM_BP_DIRECT	GO:0007156	homophilic cell adhesion via plasma membrane adhesion molecules	15	1.06383	0.0463009	Q8R508, Q99M80, Q8VHR0, Q5DRA8, Q9GV77, Q2PZL6, Q96RW7, P40199, Q6V0I7, D3YXG0, P28828, P28827, Q9HC56, Q91XY4, O14522	1203	64	8829	1.72011	1	1	0.999238
GOTERM_BP_DIRECT	GO:0090630	activation of GTPase activity	12	0.851064	0.0473276	Q5BKC9, Q13972, P70182, Q8CCN5, Q5ZJY3, Q5F361, Q9H8V3, Q13905, Q8BQZ4, P47736, Q6P9S0, Q86X10	1203	47	8829	1.87383	1	1	0.999238
GOTERM_BP_DIRECT	GO:0010751	negative regulation of nitric oxide mediated signal transduction	3	0.212766	0.0505283	P35441, Q28178, P23634	1203	3	8829	7.33915	1	1	0.999238
GOTERM_BP_DIRECT	GO:0072307	regulation of metanephric nephron tubule epithelial cell differentiation	3	0.212766	0.0505283	Q6V0I7, Q02962, Q2PZL6	1203	3	8829	7.33915	1	1	0.999238
GOTERM_BP_DIRECT	GO:1900127	positive regulation of hyaluronan biosynthetic process	3	0.212766	0.0505283	P32240, Q04861, P43114	1203	3	8829	7.33915	1	1	0.999238
GOTERM_BP_DIRECT	GO:1903934	positive regulation of DNA primase activity	3	0.212766	0.0505283	Q9Y248, Q99LZ3, P33610	1203	3	8829	7.33915	1	1	0.999238
GOTERM_BP_DIRECT	GO:0043312	neutrophil degranulation	14	0.992908	0.0509228	P61916, Q5T4S7, P09917, O75131, O75165, P40199, Q8NBS9, P29508, P23467, P46940, P07686, Q68CP4, P08962, Q13231	1203	59	8829	1.74149	1	1	0.999238
GOTERM_BP_DIRECT	GO:0009617	response to bacterium	14	0.992908	0.0509228	Q64459, Q9JLB4, Q60997, Q7Z3E2, P34147, O08816, Q12908, Q96RW7, Q2IBC1, D3YXG0, Q8BV66, Q9N294, P05153, Q13231	1203	59	8829	1.74149	1	1	0.999238
GOTERM_BP_DIRECT	GO:0000712	resolution of meiotic recombination intermediates	5	0.35461	0.0511551	Q5VXU9, A2RUV5, Q4R8G6, Q2TBR7, Q640B4	1203	11	8829	3.33598	1	1	0.999238
GOTERM_BP_DIRECT	GO:0001556	oocyte maturation	5	0.35461	0.0511551	Q14565, Q801G2, Q14432, Q9YGL1, Q91ZZ5	1203	11	8829	3.33598	1	1	0.999238
GOTERM_BP_DIRECT	GO:0060291	long-term synaptic potentiation	8	0.567376	0.0539253	P70549, Q05546, Q00546, Q9UPR5, P78509, Q99946, O35449, S4R2P9	1203	26	8829	2.2582	1	1	0.999238
GOTERM_BP_DIRECT	GO:2000378	negative regulation of reactive oxygen species metabolic process	6	0.425532	0.0556784	Q7ZVK3, O08863, Q02962, P05370, P34056, P52789	1203	16	8829	2.75218	1	1	0.999238
GOTERM_BP_DIRECT	GO:0042177	negative regulation of protein catabolic process	6	0.425532	0.0556784	A7Z064, Q7ZVK3, Q13257, P84022, Q8BTM8, O14514	1203	16	8829	2.75218	1	1	0.999238
GOTERM_BP_DIRECT	GO:0030001	metal ion transport	6	0.425532	0.0556784	P70549, P98164, P98158, Q9UPR5, Q6PEH9, S4R2P9	1203	16	8829	2.75218	1	1	0.999238
GOTERM_BP_DIRECT	GO:0006693	prostaglandin metabolic process	6	0.425532	0.0556784	P07943, Q8VCC1, Q8BK48, Q6GM65, P15428, Q3SZJ4	1203	16	8829	2.75218	1	1	0.999238
GOTERM_BP_DIRECT	GO:0007157	heterophilic cell-cell adhesion via plasma membrane cell adhesion molecules	7	0.496454	0.0558213	Q96RW7, Q00651, P40199, Q6V0I7, D3YXG0, P16109, Q2PZL6	1203	21	8829	2.44638	1	1	0.999238
GOTERM_BP_DIRECT	GO:0050727	regulation of inflammatory response	10	0.70922	0.0558623	O35678, P49582, P20735, Q1HG43, P09917, Q6ZUJ8, Q96PD5, P22366, Q13490, A5HNF6	1203	37	8829	1.98355	1	1	0.999238
GOTERM_BP_DIRECT	GO:0034613	cellular protein localization	10	0.70922	0.0558623	Q1HG43, Q2KJ93, Q9JLI7, Q9DAK2, O01761, P28648, Q9EQC5, P48148, Q9WVE9, P08962	1203	37	8829	1.98355	1	1	0.999238
GOTERM_BP_DIRECT	GO:0045056	transcytosis	4	0.283688	0.0576339	P98164, P98158, Q2HJG5, Q0IHM1	1203	7	8829	4.1938	1	1	0.999238
GOTERM_BP_DIRECT	GO:0036120	cellular response to platelet-derived growth factor stimulus	4	0.283688	0.0576339	P70705, P46940, Q6P9S0, P56192	1203	7	8829	4.1938	1	1	0.999238
GOTERM_BP_DIRECT	GO:1901653	cellular response to peptide	4	0.283688	0.0576339	P07943, O14901, Q13887, C3ZQF9	1203	7	8829	4.1938	1	1	0.999238
GOTERM_BP_DIRECT	GO:0006241	CTP biosynthetic process	4	0.283688	0.0576339	P90666, P56597, Q6PEI7, Q9Y5B8	1203	7	8829	4.1938	1	1	0.999238
GOTERM_BP_DIRECT	GO:0010839	negative regulation of keratinocyte proliferation	4	0.283688	0.0576339	Q6YHK3, P18461, Q15262, P06797	1203	7	8829	4.1938	1	1	0.999238
GOTERM_BP_DIRECT	GO:0042417	dopamine metabolic process	4	0.283688	0.0576339	P18910, P70705, P16066, P18293	1203	7	8829	4.1938	1	1	0.999238
GOTERM_BP_DIRECT	GO:0015882	L-ascorbic acid transport	4	0.283688	0.0576339	B0JZG0, Q9WTW8, Q9UGH3, Q9UHI7	1203	7	8829	4.1938	1	1	0.999238
GOTERM_BP_DIRECT	GO:0097070	ductus arteriosus closure	4	0.283688	0.0576339	P32240, Q8VCC1, P15428, P43114	1203	7	8829	4.1938	1	1	0.999238
GOTERM_BP_DIRECT	GO:0035810	positive regulation of urine volume	4	0.283688	0.0576339	P41146, P16066, P32240, P43114	1203	7	8829	4.1938	1	1	0.999238
GOTERM_BP_DIRECT	GO:0010753	positive regulation of cGMP-mediated signaling	4	0.283688	0.0576339	P18910, P16066, P18293, Q32ZE2	1203	7	8829	4.1938	1	1	0.999238
GOTERM_BP_DIRECT	GO:0050830	defense response to Gram-positive bacterium	9	0.638298	0.0603016	Q9UGM3, Q60997, Q5RBP9, Q96PD5, P22366, Q2M385, A5HNF6, Q9WUN2, Q5XJ85	1203	32	8829	2.06414	1	1	0.999238
GOTERM_BP_DIRECT	GO:0014068	positive regulation of phosphatidylinositol 3-kinase signaling	8	0.567376	0.0645867	O00329, Q02763, Q6ZUJ8, O88536, P78509, P16109, Q08048, Q02858	1203	27	8829	2.17456	1	1	0.999238
GOTERM_BP_DIRECT	GO:0071560	cellular response to transforming growth factor beta stimulus	7	0.496454	0.0682573	Q2IBC1, P84022, Q5F389, Q9NZC7, Q91WL8, Q14432, P35710	1203	22	8829	2.33518	1	1	0.999238
GOTERM_BP_DIRECT	GO:0002755	MyD88-dependent toll-like receptor signaling pathway	7	0.496454	0.0682573	A8QMS7, Q6R5N8, P22366, Q9NWZ3, Q704V6, A5HNF6, Q5XJ85	1203	22	8829	2.33518	1	1	0.999238
GOTERM_BP_DIRECT	GO:0050892	intestinal absorption	5	0.35461	0.0687132	Q8CH87, P28271, P05153, O95395, Q9BXS9	1203	12	8829	3.05798	1	1	0.999238
GOTERM_BP_DIRECT	GO:0042391	regulation of membrane potential	19	1.34752	0.0691337	Q15822, P49582, Q13003, Q61603, A3KPP3, Q5IS76, Q920B6, P48180, P30532, Q9PTS8, P17644, P09480, Q05901, Q9I8C7, P09482, P43144, Q99NH7, G5EBR3, P09479	1203	92	8829	1.51569	1	1	0.999238
GOTERM_BP_DIRECT	GO:0030198	extracellular matrix organization	18	1.2766	0.0700368	Q8NFW1, Q4V7E1, Q7JQ32, A2AX52, Q8N6G6, P70705, A8TX70, Q9JHI0, Q05546, P20849, Q00546, Q3UPW2, P26009, A6NMZ7, A6H584, P21941, Q9ULZ9	1203	86	8829	1.5361	1	1	0.999238
GOTERM_BP_DIRECT	GO:0030031	cell projection assembly	6	0.425532	0.0703561	Q7L0Q8, Q9ER71, P28660, Q9VF87, Q2KJ93, Q6P9S0	1203	17	8829	2.59029	1	1	0.999238
GOTERM_BP_DIRECT	GO:0032715	negative regulation of interleukin-6 production	6	0.425532	0.0703561	P49582, P41241, P55088, P29066, Q08048, Q4R8W3	1203	17	8829	2.59029	1	1	0.999238
GOTERM_BP_DIRECT	GO:0003341	cilium movement	9	0.638298	0.0705077	Q8TE73, P23098, Q2T9W3, Q9NQM4, B2RY50, Q8WXX0, Q9JLI7, E9Q8T7, Q8BI79	1203	33	8829	2.00159	1	1	0.999238
GOTERM_BP_DIRECT	GO:0007166	cell surface receptor signaling pathway	17	1.20567	0.0707734	Q9IB86, P18293, C6KFA3, P18910, Q8AXU4, Q13191, P16066, Q8NCJ5, O88536, A6QP74, P22366, O60242, Q13490, P23811, Q9HAR2, P27987, O14514	1203	80	8829	1.55957	1	1	0.999238
GOTERM_BP_DIRECT	GO:0045766	positive regulation of angiogenesis	14	0.992908	0.071434	P49582, P29972, O00329, Q28178, Q62077, Q08048, Q24K15, P52789, P53348, P35590, P35441, Q02763, Q13591, Q02858	1203	62	8829	1.65723	1	1	0.999238
GOTERM_BP_DIRECT	GO:0071456	cellular response to hypoxia	12	0.851064	0.0784416	P70549, P29972, P70705, Q7ZVK3, Q7ZUW2, Q920B6, P05153, Q61143, Q24K15, P19357, Q9GZT9, S4R2P9	1203	51	8829	1.72686	1	1	0.999238
GOTERM_BP_DIRECT	GO:0008360	regulation of cell shape	15	1.06383	0.0790354	Q6ZSZ5, Q96B97, P34147, O43903, Q9ER71, Q4LDD4, Q7L0Q8, Q9Y4D7, Q9VF87, Q22038, Q99NH7, P48148, P07686, P98174, Q9V4A7	1203	69	8829	1.59547	1	1	0.999238
GOTERM_BP_DIRECT	GO:0007169	transmembrane receptor protein tyrosine kinase signaling pathway	14	0.992908	0.0793156	Q9YGC1, Q99M80, O43559, P18461, Q13905, Q9H3Y6, P18106, P35590, Q02763, P16591, F1N9Y5, O14522, Q02858, P09324	1203	63	8829	1.63092	1	1	0.999238
GOTERM_BP_DIRECT	GO:0007052	mitotic spindle organization	9	0.638298	0.0817032	Q15468, Q13257, Q02224, P50748, Q12834, O15066, A5GFW1, Q96BD8, Q5JVL4	1203	34	8829	1.94272	1	1	0.999238
GOTERM_BP_DIRECT	GO:0019852	L-ascorbic acid metabolic process	4	0.283688	0.08311	B0JZG0, Q9WTW8, Q9UGH3, Q9UHI7	1203	8	8829	3.66958	1	1	0.999238
GOTERM_BP_DIRECT	GO:0009268	response to pH	4	0.283688	0.08311	P50430, O70496, P50429, Q3U2S8	1203	8	8829	3.66958	1	1	0.999238
GOTERM_BP_DIRECT	GO:1904906	positive regulation of endothelial cell-matrix adhesion via fibronectin	4	0.283688	0.08311	Q10980, P40199, O09160, Q866E6	1203	8	8829	3.66958	1	1	0.999238
GOTERM_BP_DIRECT	GO:0060326	cell chemotaxis	4	0.283688	0.08311	P33527, P70182, Q13591, Q08048	1203	8	8829	3.66958	1	1	0.999238
GOTERM_BP_DIRECT	GO:2000251	positive regulation of actin cytoskeleton reorganization	4	0.283688	0.08311	Q8CCN5, Q02763, Q2KJ93, Q02858	1203	8	8829	3.66958	1	1	0.999238
GOTERM_BP_DIRECT	GO:0051444	negative regulation of ubiquitin-protein transferase activity	4	0.283688	0.08311	Q13257, Q12834, Q9JJ66, Q8TDB6	1203	8	8829	3.66958	1	1	0.999238
GOTERM_BP_DIRECT	GO:1905167	positive regulation of lysosomal protein catabolic process	4	0.283688	0.08311	P98164, P98158, Q99M02, G3V928	1203	8	8829	3.66958	1	1	0.999238
GOTERM_BP_DIRECT	GO:0014070	response to organic cyclic compound	10	0.70922	0.0849987	P20073, O54750, P18163, P05370, P50416, O15439, P43114, Q76EQ0, P06797, E9Q236	1203	40	8829	1.83479	1	1	0.999238
GOTERM_BP_DIRECT	GO:0030593	neutrophil chemotaxis	6	0.425532	0.0869428	P16444, O00329, P24369, F1N9Y5, B8JK39, Q5XJ85	1203	18	8829	2.44638	1	1	0.999238
GOTERM_BP_DIRECT	GO:0015914	phospholipid transport	6	0.425532	0.0869428	P61916, P58195, P41233, P70704, A1A4J6, Q99758	1203	18	8829	2.44638	1	1	0.999238
GOTERM_BP_DIRECT	GO:0002040	sprouting angiogenesis	6	0.425532	0.0869428	P35441, Q02763, Q5BKL9, Q28178, Q8QFX6, Q02858	1203	18	8829	2.44638	1	1	0.999238
GOTERM_BP_DIRECT	GO:0050482	arachidonic acid secretion	5	0.35461	0.088943	Q10751, P80003, P0C551, P47712, Q9EPR2	1203	13	8829	2.82275	1	1	0.999238
GOTERM_BP_DIRECT	GO:0001936	regulation of endothelial cell proliferation	5	0.35461	0.088943	Q10980, P35590, Q02858, O09160, Q866E6	1203	13	8829	2.82275	1	1	0.999238
GOTERM_BP_DIRECT	GO:0045595	regulation of cell differentiation	5	0.35461	0.088943	Q61602, A6NJT0, P34056, Q13490, Q00438	1203	13	8829	2.82275	1	1	0.999238
GOTERM_BP_DIRECT	GO:0036158	outer dynein arm assembly	5	0.35461	0.088943	Q8TE73, Q2T9W3, Q9NQM4, B2RY50, Q91XQ0	1203	13	8829	2.82275	1	1	0.999238
GOTERM_BP_DIRECT	GO:0016477	cell migration	22	1.56028	0.0891688	O00329, P28660, Q3ZBH3, Q2KJ93, Q96B97, Q28178, Q62077, Q27874, Q6EDY6, Q00651, Q9ER71, Q7L0Q8, P35441, Q22038, B0R0D7, A1L157, Q14185, P28648, Q15262, P46940, P48148, P08962	1203	114	8829	1.41633	1	1	0.999238
GOTERM_BP_DIRECT	GO:0060368	regulation of Fc receptor mediated stimulatory signaling pathway	3	0.212766	0.0920112	P58195, P41241, Q9JJ00	1203	4	8829	5.50436	1	1	0.999238
GOTERM_BP_DIRECT	GO:0040020	regulation of meiotic nuclear division	3	0.212766	0.0920112	Q12834, Q9JJ66, Q14432	1203	4	8829	5.50436	1	1	0.999238
GOTERM_BP_DIRECT	GO:0071354	cellular response to interleukin-6	3	0.212766	0.0920112	Q99M80, O14522, Q04861	1203	4	8829	5.50436	1	1	0.999238
GOTERM_BP_DIRECT	GO:0050921	positive regulation of chemotaxis	3	0.212766	0.0920112	P35441, Q28178, O08816	1203	4	8829	5.50436	1	1	0.999238
GOTERM_BP_DIRECT	GO:0070257	positive regulation of mucus secretion	3	0.212766	0.0920112	P32240, Q62737, P43114	1203	4	8829	5.50436	1	1	0.999238
GOTERM_BP_DIRECT	GO:1904385	cellular response to angiotensin	3	0.212766	0.0920112	Q62737, Q04861, O89033	1203	4	8829	5.50436	1	1	0.999238
GOTERM_BP_DIRECT	GO:0072488	ammonium transmembrane transport	3	0.212766	0.0920112	P29972, Q21565, Q7T070	1203	4	8829	5.50436	1	1	0.999238
GOTERM_BP_DIRECT	GO:0015881	creatine transport	3	0.212766	0.0920112	Q8BGC3, Q503M4, Q6P2X9	1203	4	8829	5.50436	1	1	0.999238
GOTERM_BP_DIRECT	GO:0032760	positive regulation of tumor necrosis factor production	9	0.638298	0.0938873	P35441, O54750, Q62737, P22366, Q8R5F7, Q28178, F1N9Y5, Q6Q899, A5HNF6	1203	35	8829	1.88721	1	1	0.999238
GOTERM_BP_DIRECT	GO:0031667	response to nutrient levels	7	0.496454	0.0975234	Q86X52, P08228, P97564, Q02962, Q62737, P23811, P50416	1203	24	8829	2.14059	1	1	0.999238
GOTERM_BP_DIRECT	GO:0019369	arachidonic acid metabolic process	7	0.496454	0.0975234	O35678, P09917, O16025, O54750, P24470, P24453, P47712	1203	24	8829	2.14059	1	1	0.999238
GOTERM_CC_DIRECT	GO:0005887	integral component of plasma membrane	139	9.85816	9.99557e-10	O95436, Q5RLM2, Q9VCZ3, P70549, O88854, A1L157, Q9CWP6, Q15262, Q02858, P08962, P56404, Q15822, Q13003, Q3ZBH3, Q61603, O01761, P16109, Q8NFZ3, O57321, Q9Y4D7, Q96BD0, Q9JJ00, C3ZQF9, P43144, Q99M80, Q91Y77, Q9V576, Q9Y289, P18461, Q68EF4, Q96FT7, P17644, P41233, Q99102, Q7T070, Q8K299, P09479, Q91ZZ5, Q9BXS9, P23385, O94778, Q9Y5X5, Q9H015, Q5DRA8, Q9UHI7, Q61143, Q3UVX5, S4R2P9, P09480, P35590,…	1284	610	9240	1.6398	6.66704e-07	6.66704e-07	6.60707e-07
GOTERM_CC_DIRECT	GO:0005886	plasma membrane	336	23.8298	3.36896e-09	Q6IMN6, O95436, O43559, Q5RLM2, Q3SWX0, P70549, Q23157, Q8AXU4, B2IZD3, Q7L0Q8, P84022, P08842, Q8TDD5, Q04519, P08962, P35408, Q96MB7, Q13003, P56486, Q9IBD8, P16109, Q8NFZ3, O75131, Q6EDY6, Q03412, Q9JJ00, Q9BIW4, P16591, P55043, Q5SPC5, P43144, Q9ULX7, Q6P9S0, P06797, G5EBX9, Q5XJ85, Q9WVE9, P00450, Q99M80, P28660, Q29042, P97564, Q9Y289, A2ASS6, Q8TEU7, Q0VA77, P16444, Q5R9F4, Q99102, Q16651,…	1284	1839	9240	1.31481	2.24709e-06	1.12355e-06	1.11344e-06
GOTERM_CC_DIRECT	GO:0005576	extracellular region	136	9.64539	4.27716e-06	Q9VG08, Q6GLJ1, Q8LPL3, H2A0M3, P56597, H2A0M1, O70497, Q5H8C1, B8V7S0, P0C551, Q08048, P35778, A8E627, Q25338, D3YXG0, H2A0L6, H2A0L4, Q02858, Q04519, Q01528, H2A0L8, P28039, Q5F2F2, A1BQQ5, P08962, Q6L6Q6, Q5EA66, Q9UGM3, C3YWU0, Q60997, Q18932, H2A0L1, Q9WVM6, Q32KI9, P20849, Q9QY48, Q00546, Q6UX07, D8VNS7, E9Q8T7, P86952, P05186, Q5ZEQ8, A6H584, Q9BZP6, P06797, Q8N0N3, Q96WM9, Q9IA95, P00450,…	1284	678	9240	1.4435	0.00284881	0.000950955	0.000942401
GOTERM_CC_DIRECT	GO:0005615	extracellular space	94	6.66667	4.85871e-05	P07943, Q91WN1, P98158, O70497, P78509, Q28178, Q5U367, Q8NFW1, Q08048, Q504N0, A2AJ76, Q8CFG8, Q923P0, Q04519, P08962, P61916, Q40965, P30710, Q7Z5L3, Q5EA66, O19010, Q9UGM3, Q60997, O75973, P80177, Q20930, P16109, Q9NWZ3, P29183, Q804S2, Q98ST7, P40199, Q9JHI0, P20849, Q92484, Q00546, Q8VCC1, P28648, P05186, Q8R4V5, Q8NDA2, Q9BZP6, O43490, Q5RC46, P06797, Q99758, O14514, Q9IA95, Q2KJ63, P00450,…	1284	454	9240	1.48997	0.0318889	0.00810191	0.00802903
GOTERM_CC_DIRECT	GO:0016323	basolateral plasma membrane	34	2.41135	0.000104356	P29972, Q91Y77, Q9UPR5, Q9UGH3, Q9Y289, P55088, P15428, Q5RLM2, P35559, Q63016, P41233, P70705, Q4TVR5, Q99NH7, Q02858, O15439, Q7T070, Q9BXS9, P33527, Q8R4P9, Q9WTW8, P29066, A2AJN7, G3V928, Q27874, Q8BGC3, Q8NBI5, Q02763, Q8VCC1, Q5SPC5, Q3YAW7, P23634, O95907, E9Q236	1284	123	9240	1.98921	0.0672414	0.013921	0.0137958
GOTERM_CC_DIRECT	GO:0016021	integral component of membrane	384	27.234	0.000301473	O70496, Q9VCA2, Q5H8C1, O95436, A4QP81, Q3SWX0, Q23157, Q8AXU4, B2IZD3, Q25338, Q2YDL5, Q9CWP6, Q5XK92, P08842, Q8TDD5, Q04519, Q5JZQ8, P08962, B0JZG0, P35408, Q6DDL7, Q9CR58, Q13003, Q3ZBH3, P56486, Q9IBD8, P16109, Q8NFZ3, Q6EDY6, Q4R910, Q9I9B9, Q03412, Q9JJ00, Q8MZC4, Q5SPC5, Q6X0I2, Q9ULX7, Q99M80, Q91Y77, C1C524, P28660, Q9V576, P97564, Q9U3W6, Q9Y289, P35992, Q4R9E0, Q0VA77, O42449, Q91XE9,…	1284	2391	9240	1.15574	0.18218	0.0335137	0.0332122
GOTERM_CC_DIRECT	GO:0030286	dynein complex	12	0.851064	0.00054488	Q8TE73, P23098, Q8IVF4, Q16959, Q9DCM4, Q8WXX0, Q16960, E9Q8T7, Q26630, Q32KN5, Q91XQ0, Q9C0G6	1284	27	9240	3.19834	0.304785	0.0498101	0.049362
GOTERM_CC_DIRECT	GO:0045177	apical part of cell	19	1.34752	0.000597422	P56404, Q13895, P29972, Q6ZSZ5, Q9JLB4, P98158, O94778, Q9V576, Q2KJ93, P35992, G3V928, Q2PZL6, Q76EQ0, Q8AV28, P16444, Q9VF87, Q6V0I7, P26009, P06797	1284	58	9240	2.3574	0.328741	0.0498101	0.049362
GOTERM_CC_DIRECT	GO:0016324	apical plasma membrane	43	3.04965	0.00284408	P49582, Q6ZSZ5, P29972, Q9JLB4, P98158, O95436, P09849, Q9UGH3, Q9Y289, Q920B6, P31597, F1RWC3, Q12908, Q8TEU7, Q63016, Q27960, P16444, P70705, O76082, Q4TVR5, Q5TF39, P48148, Q02858, O15439, Q9BXS9, P33527, P98164, Q9WTW8, Q62737, O35186, A2AJN7, Q9H015, Q9UHI7, Q3U2S8, P40199, O00180, P82251, Q02763, Q49B93, O43490, P06797, O95907, E9Q236	1284	198	9240	1.56282	0.850387	0.210778	0.208882
GOTERM_CC_DIRECT	GO:0043005	neuron projection	52	3.68794	0.00396199	P53565, O17583, P49582, O02768, Q6IDD9, Q96B97, P78509, Q920B6, Q7KVW5, P70705, Q6DGU5, A5GFW1, P46940, O93388, Q15822, Q9UGI6, Q61603, E9PTA2, Q91YD4, Q9VF87, P43144, P23634, P06797, Q13972, Q5IS76, Q68EF4, P31597, P70403, Q9PTS8, P17644, Q05901, Q07409, Q9I8C7, Q14191, Q967R6, P09479, P08228, P23385, Q62077, Q27874, Q9QYS2, P48180, Q3UVX5, P30532, P09480, P41146, Q8CBY1, Q68G38, Q9DAK2, P09482,…	1284	255	9240	1.46747	0.9292	0.264265	0.261888
GOTERM_CC_DIRECT	GO:0031088	platelet dense granule membrane	5	0.35461	0.0043939	P16109, P11881, O15439, P08962, E9Q236	1284	6	9240	5.99688	0.946985	0.26643	0.264033
GOTERM_CC_DIRECT	GO:0005581	collagen trimer	17	1.20567	0.0064386	Q7Z5L3, Q29042, O75973, O70497, Q8K4Q8, Q86Z23, Q8NFW1, Q5XIG2, Q9WTS8, A2AX52, Q8MHZ9, A8TX70, P20849, Q60847, A6NMZ7, Q923P0, A6H584	1284	60	9240	2.03894	0.986545	0.356928	0.353717
GOTERM_CC_DIRECT	GO:0005930	axoneme	22	1.56028	0.00695662	Q8TE73, Q2T9W3, Q8IYW2, Q6PGZ3, Q61602, A4Q9F3, Q9JLI7, Q8NEY3, Q3UY96, Q26630, P59910, Q9CQ66, B5FYQ0, Q8IVF4, Q5F201, Q9D5E4, Q96N23, B2RY50, E9Q8T7, Q8BI79, Q91XQ0, Q5JVL4	1284	87	9240	1.81974	0.990498	0.356928	0.353717
GOTERM_CC_DIRECT	GO:0045121	membrane raft	27	1.91489	0.0081381	Q08462, P49582, Q9CX84, P98158, Q9ES87, P11881, Q9Z0J4, P19357, P41233, P70705, Q05546, P46940, Q02858, Q5JZQ8, P58195, O08863, Q2IBC1, Q13191, Q02763, Q00546, P41241, Q9JJ00, Q61391, P23634, Q13490, Q704V6, Q8K1S4	1284	116	9240	1.67499	0.995705	0.3833	0.379852
GOTERM_CC_DIRECT	GO:0043197	dendritic spine	18	1.2766	0.00861994	O17583, Q5SSM3, P49582, P23385, Q9UPR5, Q2KJ93, P29066, O15066, Q5E9F9, Q9Z0J4, Q9QYS2, Q3UVX5, S4R2P9, Q80U87, P70549, Q7Z6G8, Q9WVE9, O14514	1284	67	9240	1.93332	0.996894	0.3833	0.379852
GOTERM_CC_DIRECT	GO:0000811	GINS complex	4	0.283688	0.00957615	Q9Y248, Q99LZ3, Q7ZT01, Q7ZT47	1284	4	9240	7.19626	0.998368	0.399206	0.395615
GOTERM_CC_DIRECT	GO:0097228	sperm principal piece	6	0.425532	0.0114393	Q9CQ46, Q9JLI7, P23634, Q62252, Q5CZC0, Q91XQ0	1284	11	9240	3.92523	0.999535	0.448825	0.444788
GOTERM_CC_DIRECT	GO:0005788	endoplasmic reticulum lumen	21	1.48936	0.0143315	P00450, Q8BP92, Q9BTV4, G3V9D0, Q5U367, Q8NFW1, Q8N6G6, Q3USW5, Q9P2K2, Q8IWF2, Q8NBS9, Q15293, Q15084, Q68G38, P20849, Q7ZUW2, P24369, Q9NWM8, P08842, Q5JZQ8, P24367	1284	87	9240	1.73703	0.999934	0.53106	0.526283
GOTERM_CC_DIRECT	GO:0036126	sperm flagellum	12	0.851064	0.0210148	Q9H0F5, Q9QXM0, Q9D5E4, Q8VIG3, P56597, E9Q8T7, Q5JU00, P23634, A6H782, P59910, B2RW38, Q91XQ0	1284	41	9240	2.10622	0.999999	0.737731	0.731095
GOTERM_CC_DIRECT	GO:0043235	receptor complex	21	1.48936	0.022971	P98164, Q14831, Q9JLB4, Q6IMN6, P98158, P18293, P18461, G3V928, P18433, P35590, P18910, Q9NZR2, P16066, Q02763, P84022, A6QP74, P23467, O88488, Q704V6, Q02858, Q14596	1284	91	9240	1.66068	1	0.76134	0.754491
GOTERM_CC_DIRECT	GO:0005902	microvillus	11	0.780142	0.0258485	P70705, P47727, Q02763, Q5F389, Q9NZC7, Q91WL8, Q02858, Q12908, O43490, P06797, Q58CS6	1284	37	9240	2.13943	1	0.76134	0.754491
GOTERM_CC_DIRECT	GO:0034663	endoplasmic reticulum chaperone complex	5	0.35461	0.026104	Q15084, P02518, Q7ZUW2, P24369, P24367	1284	9	9240	3.99792	1	0.76134	0.754491
GOTERM_CC_DIRECT	GO:0005938	cell cortex	22	1.56028	0.0262531	Q14831, Q2NKT1, Q0E908, P18461, Q9H8V3, Q8BTM8, P34147, Q54RB7, Q96RW7, P61162, A2AJ76, Q2IBC1, Q22038, B0R0D7, D3YXG0, Q9BIW4, P16591, Q96RU3, P24844, P48148, Q8NDA2, P42674	1284	98	9240	1.61549	1	0.76134	0.754491
GOTERM_CC_DIRECT	GO:0031410	cytoplasmic vesicle	46	3.26241	0.028059	A2RUS2, O70496, Q9CX00, P18461, Q99M02, P34147, Q68EF4, P11881, Q3V0Q6, Q6DC93, Q2TBS4, Q5F415, P70705, P70704, Q4LDD4, O35600, Q5RBP9, Q7TSF2, Q96RU3, Q5RFR8, Q2M385, P29508, Q4R562, P48148, Q6DFQ7, Q7T070, P28039, P08228, Q60997, Q9JME5, Q9JLI7, Q5RID7, P29066, O08816, Q5G270, P41146, Q9QXM0, Q91YD4, Q6NZC7, Q22038, Q6DFV3, Q61391, Q2HJ10, Q5SPC5, Q5RCS0, P06797	1284	245	9240	1.35113	1	0.779805	0.772791
GOTERM_CC_DIRECT	GO:0031226	intrinsic component of plasma membrane	6	0.425532	0.0346933	P70549, P23471, P28648, Q8K1S4, P08962, S4R2P9	1284	14	9240	3.08411	1	0.925618	0.917292
GOTERM_CC_DIRECT	GO:0032585	multivesicular body membrane	5	0.35461	0.0388164	Q9CR23, P28648, Q99LI8, Q99758, P08962	1284	10	9240	3.59813	1	0.959098	0.95047
GOTERM_CC_DIRECT	GO:0070062	extracellular exosome	57	4.04255	0.0392664	Q9JLB4, P29972, Q3SY69, Q9H2M3, O95395, O76082, Q8IWB6, P46940, P08962, P61916, P98164, Q9UGM3, Q96PD5, P52209, O75131, Q9P2K2, Q92484, Q6IQ20, P28648, P05186, P07686, O43490, P00450, Q6ZSZ5, Q9CX00, O15066, Q14624, P15428, P35559, F1RWC3, O75165, P19357, P16444, Q96RW7, Q00651, Q15084, Q99102, Q16651, Q9UBQ7, P29508, Q9Y490, P33527, Q9HAT2, Q10751, P20073, O43301, Q96FW1, Q9UHI7, P12645, P54802,…	1284	321	9240	1.27784	1	0.959098	0.95047
GOTERM_CC_DIRECT	GO:0031526	brush border membrane	12	0.851064	0.040262	P98164, Q9JLB4, P29972, P70705, O76082, O00180, P98158, P82251, Q9Y289, O95436, Q9JMA9, Q9BXS9	1284	45	9240	1.919	1	0.959098	0.95047
GOTERM_CC_DIRECT	GO:0005892	acetylcholine-gated channel complex	12	0.851064	0.0465305	Q9PTS8, P17644, Q15822, P09480, P49582, Q05901, P18845, P09482, Q5IS76, P43144, P30532, P09479	1284	46	9240	1.87729	1	1	0.992492
GOTERM_CC_DIRECT	GO:0030659	cytoplasmic vesicle membrane	17	1.20567	0.0498929	Q5RID7, Q96B97, A5HK05, Q8IYT8, P11881, P19357, E9PTA2, P11233, Q91YD4, Q5RBP9, Q68G38, Q6DFV3, Q2M385, Q5RCS0, Q7T070, Q9BXS9, Q99758	1284	75	9240	1.63115	1	1	0.992492
GOTERM_CC_DIRECT	GO:0005929	cilium	38	2.69504	0.0540255	Q9Y547, Q9CQ46, Q4V8Z3, P56597, O15066, Q9CQ66, Q6B857, Q8IVF4, B2RY50, O88854, A5GFW1, Q8BI79, Q32KN5, B2RW38, Q16959, Q61602, Q66KE9, A4Q9F3, Q9JLI7, Q62252, Q63421, B5FYQ0, Q58CS6, Q5F201, Q8VIG3, Q9D5E4, Q2IBC1, Q9DCM4, Q6P2Y2, Q8WXX0, Q9DAK2, Q16960, E9Q8T7, Q3SZH6, Q91XQ0, O43490, G5EBX9, Q32L26	1284	205	9240	1.33394	1	1	0.992492
GOTERM_CC_DIRECT	GO:0031514	motile cilium	19	1.34752	0.0562743	Q8TE73, P23098, Q9CQ46, Q9JLI7, Q62252, Q9UIF3, Q0V9S9, P59910, Q6B857, Q58CS6, Q4R6T7, Q5F201, Q9D5E4, Q8VIG3, E9Q8T7, Q3SZH6, A6H782, Q8BI79, Q91XQ0	1284	88	9240	1.55374	1	1	0.992492
GOTERM_CC_DIRECT	GO:0031012	extracellular matrix	23	1.63121	0.0605717	Q9UGM3, Q60997, P78509, Q28178, Q8NFW1, A2AX52, Q8N6G6, Q9Y6R7, O08523, P22757, A2AJ76, Q9JHI0, P35441, Q99102, Q05546, P20849, P09487, A6NMZ7, P05186, A6H584, P21941, Q8NDA2, Q9ULZ9	1284	113	9240	1.46473	1	1	0.992492
GOTERM_CC_DIRECT	GO:0031209	SCAR complex	4	0.283688	0.0606139	Q91VR8, P28660, Q9VF87, Q6QGW5	1284	7	9240	4.11215	1	1	0.992492
GOTERM_CC_DIRECT	GO:0009897	external side of plasma membrane	21	1.48936	0.061452	P98164, P49582, Q10751, Q6UXB4, P98158, P55088, O35186, Q28178, B8JK39, P16109, Q62252, G3V928, P35559, P19357, P41233, Q00651, P35441, P26009, Q5RFW0, Q8K299, P06797	1284	101	9240	1.49625	1	1	0.992492
GOTERM_CC_DIRECT	GO:0009925	basal plasma membrane	11	0.780142	0.0661885	P33527, P29972, Q9WTW8, Q02763, Q9Y289, Q9UGH3, P55088, B8JK39, Q9UHI7, Q02858, Q63016	1284	43	9240	1.8409	1	1	0.992492
GOTERM_CC_DIRECT	GO:0016020	membrane	257	18.227	0.0665044	E9QAT4, O70496, Q7ZXF1, A4QP81, Q9BWT3, O43559, Q6DC93, Q3SWX0, P70549, Q23157, Q04757, Q5RFR8, Q9Y394, Q9CWP6, P08842, Q8TDD5, Q5JZQ8, Q6TLK4, Q9CR58, Q92968, Q9UGM3, Q6EDY6, Q03412, Q9JJ00, Q6UX07, Q8MZC4, P55043, Q5SPC5, P06797, G5EBX9, Q99M80, P28660, Q9Y289, Q91XE9, Q9NGC3, Q95XZ6, Q99102, Q80ZI6, Q8R367, Q7T070, P47736, Q14596, Q8K299, Q91ZZ5, Q9BXS9, O18023, Q96EQ0, Q13823, Q9JME5, O73853,…	1284	1699	9240	1.08855	1	1	0.992492
GOTERM_CC_DIRECT	GO:0009986	cell surface	39	2.76596	0.074731	Q99M80, P50430, P98158, Q6YHK3, P18461, Q28178, Q920B6, P35559, P19357, Q00651, P41233, P70627, P35441, Q05546, P54939, Q15262, O14522, Q02858, Q8K299, P26039, P08962, P09479, Q9Y490, Q9Y5X9, P48542, O77633, Q3SYV5, Q8NFZ3, Q27874, P11233, P40199, O08688, Q02763, P50429, Q00546, P26009, P28648, Q8R4V5, O43490	1284	217	9240	1.29334	1	1	0.992492
GOTERM_CC_DIRECT	GO:0005903	brush border	10	0.70922	0.0822595	P98164, Q9JLB4, P29972, Q9CX84, P98158, O95436, Q61391, Q8BTM8, Q9UHI7, Q27960	1284	39	9240	1.8452	1	1	0.992492
GOTERM_CC_DIRECT	GO:0005905	clathrin-coated pit	11	0.780142	0.0855398	P98164, Q9JLB4, P98158, Q96RU3, P29066, Q4R562, P34056, G3V928, F1RWC3, P19357, Q9WVE9	1284	45	9240	1.75909	1	1	0.992492
GOTERM_CC_DIRECT	GO:0071162	CMG complex	4	0.283688	0.0872227	Q9Y248, Q99LZ3, Q7ZT01, Q7ZT47	1284	8	9240	3.59813	1	1	0.992492
GOTERM_CC_DIRECT	GO:0042995	cell projection	49	3.47518	0.0903469	Q9CQ46, P70182, Q6PGZ3, Q4V8Z3, Q8BTM8, Q05209, P70549, Q7L0Q8, E9Q309, Q8BI79, B2RW38, Q5SSM3, Q61602, A4Q9F3, Q61603, Q9JLI7, Q6EDY6, Q9D5E4, Q8VIG3, Q91YD4, Q22038, Q9DCM4, P16591, E9Q8T7, Q5SPC5, Q6Q899, Q6P9S0, G5EBX9, P28660, P55088, P34147, Q8BRG6, Q10901, Q9Z0J4, B0R0D7, B2RY50, P48148, P26039, Q09LZ8, Q921A2, Q62077, Q1EG27, P48180, S4R2P9, Q9Z309, Q5F201, Q8CBY1, Q91XQ0, Q8K1S4	1284	286	9240	1.23293	1	1	0.992492
GOTERM_CC_DIRECT	GO:0032154	cleavage furrow	10	0.70922	0.093702	Q96RW7, A2AJ76, Q22038, D3YXG0, P61287, Q0E908, O70212, Q9H8V3, Q8NDA2, P11233	1284	40	9240	1.79907	1	1	0.992492
GOTERM_CC_DIRECT	GO:0043231	intracellular membrane-bounded organelle	67	4.75177	0.0937147	Q9CR23, E9QAT4, O70496, Q8CEQ0, P11881, Q63016, Q9WUN2, P70503, Q91YE8, O08795, O35600, P70704, Q96RU3, P05370, P54939, Q15262, Q7Z6G8, P08842, P28039, P08962, P47712, P56404, Q61602, Q13887, Q9CX98, Q95078, Q99996, Q22038, Q2HJ10, P24369, P28648, P23634, O09174, P23514, P24367, P06797, Q99758, Q99K82, Q13895, Q91Y77, Q9CX00, P34147, O75165, P19357, P41233, Q4LDD4, P48148, Q14596, Q64459, P24470,…	1284	406	9240	1.18756	1	1	0.992492
GOTERM_CC_DIRECT	GO:0033597	mitotic checkpoint complex	3	0.212766	0.09534	Q13257, Q12834, Q9JJ66	1284	4	9240	5.3972	1	1	0.992492
GOTERM_CC_DIRECT	GO:0005771	multivesicular body	8	0.567376	0.0972006	Q8MHZ9, Q28557, Q7TSF2, P28648, Q6NXD2, P19357, P06797, P08962	1284	29	9240	1.98518	1	1	0.992492
GOTERM_MF_DIRECT	GO:0005509	calcium ion binding	88	6.24113	2.97901e-05	Q8R508, Q9JLB4, Q8BP92, Q9CQ46, P98158, Q28178, P0C551, P11881, A4FU69, Q6DC93, O08795, A2AJ76, Q26627, D3YXG0, Q8CFG8, Q9UH65, Q9HC56, O60041, P46940, Q9HAR2, Q9NWM8, P28039, P47712, P98164, Q8TER0, Q8VHR0, P27163, P16109, Q9BQS2, E9PTA2, P58195, Q91YD4, Q9WVM6, Q9JJ00, P02637, Q5BKL9, Q5SPC5, P24844, P05186, P20241, Q9U6D3, Q8R4V5, Q8NDA2, Q6X0I2, G5EBX9, Q9WVE9, O57409, Q32L26, Q3E9C0, O74798,…	1229	411	8790	1.53136	0.0386749	0.0394421	0.0394421
GOTERM_MF_DIRECT	GO:0001640	adenylate cyclase inhibiting G-protein coupled glutamate receptor activity	6	0.425532	0.000867603	Q14831, Q13003, P23385, Q68EF4, Q9QYS2, Q3UVX5	1229	7	8790	6.13042	0.683111	0.574353	0.574353
GOTERM_MF_DIRECT	GO:0004383	guanylate cyclase activity	10	0.70922	0.00176268	P18910, P16066, P46197, P18293, Q8INF0, P22717, Q02153, Q07553, Q7JQ32	1229	22	8790	3.25098	0.903271	0.725168	0.725168
GOTERM_MF_DIRECT	GO:0045505	dynein intermediate chain binding	11	0.780142	0.00239742	Q8TE73, Q8IVF4, Q9NQM4, Q9DCM4, Q66IC8, Q8WXX0, E9Q8T7, Q32KN5, Q91XQ0, Q9CQ66, Q9C0G6	1229	27	8790	2.91384	0.958331	0.725168	0.725168
GOTERM_MF_DIRECT	GO:0005516	calmodulin binding	24	1.70213	0.002831	Q8IW41, Q5T4S7, Q9UGI6, Q3E9C0, Q9UPR5, Q60HG7, Q7SXM0, P62290, Q62252, Q68EF4, Q63421, A2ASS6, Q7KVW5, Q9Z0J4, Q23551, S4R2P9, P70549, Q9DB30, P55043, P24733, P23634, P46940, P27987, Q4R7Z7	1229	91	8790	1.88628	0.976566	0.725168	0.725168
GOTERM_MF_DIRECT	GO:0005178	integrin binding	18	1.2766	0.00328626	P23471, Q3ZBH3, P20073, P20072, Q28178, B8JK39, Q27874, Q9Z309, Q00651, P35441, Q9DCK3, Q05546, Q9Y4G6, P54939, P26009, F1N9Y5, P26039, Q9Y490	1229	61	8790	2.11047	0.987198	0.725168	0.725168
GOTERM_MF_DIRECT	GO:0004957	prostaglandin E receptor activity	6	0.425532	0.00407782	Q95KZ0, P35408, P32240, Q8VCC1, P15428, P43114	1229	9	8790	4.7681	0.995529	0.77129	0.77129
GOTERM_MF_DIRECT	GO:0005001	transmembrane receptor protein tyrosine phosphatase activity	9	0.638298	0.00532357	P23471, Q99M80, P28828, P23467, P28827, O14522, Q15262, P35992, P18433	1229	21	8790	3.06521	0.999147	0.881051	0.881051
GOTERM_MF_DIRECT	GO:0017046	peptide hormone binding	10	0.70922	0.00657705	P18910, P16066, P46197, Q5D0K2, P18293, O88854, P23811, P35559, O97772, Q91ZZ5	1229	26	8790	2.75083	0.999839	0.967557	0.967557
GOTERM_MF_DIRECT	GO:0015250	water channel activity	4	0.283688	0.00974569	P56404, P29972, O94778, P55088	1229	4	8790	7.15216	0.999998	1	1
GOTERM_MF_DIRECT	GO:0042562	hormone binding	6	0.425532	0.0117369	P98164, P18910, Q9QXM0, P98158, P16066, P18293	1229	11	8790	3.90118	1	1	1
GOTERM_MF_DIRECT	GO:0008061	chitin binding	7	0.496454	0.01191	H9J9M0, Q01459, Q66IL0, H2A0L4, Q6AX44, Q9BZP6, Q13231	1229	15	8790	3.33767	1	1	1
GOTERM_MF_DIRECT	GO:0015293	symporter activity	22	1.56028	0.0125561	Q9XT77, Q8R0M8, Q761V0, Q9Y345, Q9Y289, A2AJN7, Q9H015, Q10901, P31597, P53988, Q7RTX9, Q8BGC3, O76082, Q503M4, Q5TF39, Q7TSF2, Q49B93, Q9JMA9, Q0IHM1, Q6P2X9, O95907, Q7SYH5	1229	91	8790	1.72909	1	1	1
GOTERM_MF_DIRECT	GO:0017124	SH3 domain binding	16	1.13475	0.0136082	P98164, P98158, Q62737, Q96B97, O77633, Q13905, Q80U87, Q05209, P58195, Q13191, Q9JJ00, Q9NZQ3, Q14185, P98081, Q8IZD9, Q6TLK4	1229	59	8790	1.93957	1	1	1
GOTERM_MF_DIRECT	GO:0008569	ATP-dependent microtubule motor activity, minus-end-directed	8	0.567376	0.0150659	Q8TE73, P23098, Q8IVF4, Q8WXX0, E9Q8T7, Q4R918, Q91XQ0, Q9C0G6	1229	20	8790	2.86086	1	1	1
GOTERM_MF_DIRECT	GO:0051959	dynein light intermediate chain binding	8	0.567376	0.0150659	Q8TE73, Q8IVF4, Q9DCM4, Q8WXX0, E9Q8T7, Q32KN5, Q91XQ0, Q9C0G6	1229	20	8790	2.86086	1	1	1
GOTERM_MF_DIRECT	GO:1990837	sequence-specific double-stranded DNA binding	27	1.91489	0.0151139	P53565, P56931, O75626, O95238, P50219, P14316, Q4V7E1, P53567, P70403, O14901, Q96QS3, Q96LI6, Q7TNK1, P50222, P48382, Q61602, A6NJT0, Q13887, P50549, P34056, P36956, P32314, Q8R1B8, Q02962, Q3UPW2, P43301	1229	121	8790	1.59594	1	1	1
GOTERM_MF_DIRECT	GO:0001653	peptide receptor activity	7	0.496454	0.0168454	P18910, P16066, P46197, P18293, Q07553, Q7JQ32	1229	16	8790	3.12907	1	1	1
GOTERM_MF_DIRECT	GO:0017080	sodium channel regulator activity	6	0.425532	0.0178409	A3KPP3, Q16651, Q9ES87, Q8K1T0, P23634, Q9Z0J4	1229	12	8790	3.57608	1	1	1
GOTERM_MF_DIRECT	GO:0020037	heme binding	28	1.98582	0.0248488	O02768, Q9V5L3, Q9Z0J4, O93297, P17666, P22717, Q92113, P20351, P24453, A8WGA0, Q8N118, Q64459, Q09660, G5EG78, O16025, O73853, Q8INF0, P24470, Q62737, Q9CX98, Q02153, Q9VQH2, Q9V8M2, Q95078, O54750, Q9VA27, Q6NT55, P48416	1229	132	8790	1.51712	1	1	1
GOTERM_MF_DIRECT	GO:0043027	cysteine-type endopeptidase inhibitor activity involved in apoptotic process	8	0.567376	0.0258072	P16444, A9ULZ2, Q9R0I6, O08863, Q24307, P29066, O62640, Q13490	1229	22	8790	2.60078	1	1	1
GOTERM_MF_DIRECT	GO:0043236	laminin binding	5	0.35461	0.0266476	C6KFA3, P23385, P35441, Q28178, B8JK39	1229	9	8790	3.97342	1	1	1
GOTERM_MF_DIRECT	GO:0048306	calcium-dependent protein binding	10	0.70922	0.027257	Q9UGM3, P20073, O70497, P20072, P16109, O60041, P23634, Q68EF4, O75131, Q9Z0J4	1229	32	8790	2.23505	1	1	1
GOTERM_MF_DIRECT	GO:0005507	copper ion binding	13	0.921986	0.0339598	Q96WM9, P00450, P08228, B1VTI5, Q8LPL3, Q40588, H2A0M3, H2A0L1, Q98ST7, P38993, P70705, Q0IP28, P86952	1229	49	8790	1.89751	1	1	1
GOTERM_MF_DIRECT	GO:0005506	iron ion binding	27	1.91489	0.0352046	Q5U367, Q9V5L3, O93297, P17666, Q92038, Q92113, P24453, Q9GZT9, Q5ZIX8, A8WGA0, Q8N118, Q64459, Q09660, P09917, O16025, O73853, P24470, Q9CX98, Q9V8M2, Q95078, P16331, O54750, Q9VA27, Q6NWZ9, Q6NT55, G5EBX9, P48416	1229	130	8790	1.48545	1	1	1
GOTERM_MF_DIRECT	GO:0030020	extracellular matrix structural constituent conferring tensile strength	6	0.425532	0.0355177	A8TX70, P20849, Q60847, A6NMZ7, A6H584, A2AX52	1229	14	8790	3.06521	1	1	1
GOTERM_MF_DIRECT	GO:0022848	acetylcholine-gated cation-selective channel activity	16	1.13475	0.0359817	Q15822, P49582, Q5IS76, P48180, P30532, Q9PTS8, P17644, P09480, Q05901, P18845, Q9I8C7, P09482, P43144, P23414, Q8JFN7, P09479	1229	66	8790	1.73386	1	1	1
GOTERM_MF_DIRECT	GO:0005525	GTP binding	51	3.61702	0.0376029	P46197, Q99JY3, P34729, Q58D56, Q07553, Q7JQ32, P18910, B2IZD3, Q7L0Q8, Q7K556, P16066, Q1ZXD6, P18293, Q2KJ93, Q9VX32, Q9NUV9, Q9ER71, Q22038, P55043, P41924, Q6Q899, Q53G44, Q6NYU7, Q6DCC6, P34147, Q3SYU2, Q5R9F4, Q9NGC3, Q58D72, P22717, Q7ZYF1, P05153, Q8R367, Q6V7V2, P48148, P05712, P11833, Q13823, Q8INF0, Q16YG0, Q02153, P31582, Q55E58, P91924, B5FYQ0, P11233, Q96S79, G3X987, Q05974, Q05976	1229	280	8790	1.30271	1	1	1
GOTERM_MF_DIRECT	GO:0015491	cation:cation antiporter activity	4	0.283688	0.0391776	P70549, Q9UPR5, Q9H015, S4R2P9	1229	6	8790	4.7681	1	1	1
GOTERM_MF_DIRECT	GO:0070976	TIR domain binding	4	0.283688	0.0391776	A8QMS7, P22366, A5HNF6, Q5XJ85	1229	6	8790	4.7681	1	1	1
GOTERM_MF_DIRECT	GO:0005262	calcium channel activity	13	0.921986	0.039212	Q7TN88, Q7Z3S7, Q13507, Q61143, P11881, Q9Z1L5, Q9HCF6, Q9PTS8, Q91YD4, Q26627, Q9I8C7, P43144, Q8TDD5	1229	50	8790	1.85956	1	1	1
GOTERM_MF_DIRECT	GO:0015464	acetylcholine receptor activity	10	0.70922	0.0394897	P17644, Q15822, P09480, P49582, Q05901, P18845, P09482, Q5IS76, P30532, P09479	1229	34	8790	2.10358	1	1	1
GOTERM_MF_DIRECT	GO:0008066	glutamate receptor activity	5	0.35461	0.0395968	Q14831, Q13003, P23385, Q68EF4, Q3UVX5	1229	10	8790	3.57608	1	1	1
GOTERM_MF_DIRECT	GO:0016616	oxidoreductase activity, acting on the CH-OH group of donors, NAD or NADP as acceptor	9	0.638298	0.0580871	P73574, Q8VCC1, Q9Y394, Q9UBQ7, P15428, Q99L04, Q99L13, P45377, D4A1J4	1229	31	8790	2.07643	1	1	1
GOTERM_MF_DIRECT	GO:0004725	protein tyrosine phosphatase activity	18	1.2766	0.0586428	P51452, Q13115, P23471, Q99M80, Q7ZXF1, Q9IBD8, P35992, P18433, Q05209, P28828, Q9JLY7, P23467, P28827, Q15262, O14522, O88488, P20483, O13016	1229	82	8790	1.56999	1	1	1
GOTERM_MF_DIRECT	GO:0001786	phosphatidylserine binding	8	0.567376	0.0606441	P35441, Q61391, P54939, Q28178, Q9BQS2, Q9Y490, P26039, O14514	1229	26	8790	2.20066	1	1	1
GOTERM_MF_DIRECT	GO:0001968	fibronectin binding	6	0.425532	0.0611743	Q00651, P23385, P35441, O35186, Q28178, P06797	1229	16	8790	2.68206	1	1	1
GOTERM_MF_DIRECT	GO:0038024	cargo receptor activity	6	0.425532	0.0611743	P98164, Q9JLB4, O88536, G3V928, Q6X0I2, F1RWC3	1229	16	8790	2.68206	1	1	1
GOTERM_MF_DIRECT	GO:0035325	Toll-like receptor binding	4	0.283688	0.0615618	P22366, F1N9Y5, A5HNF6, Q5XJ85	1229	7	8790	4.08695	1	1	1
GOTERM_MF_DIRECT	GO:0045295	gamma-catenin binding	4	0.283688	0.0615618	Q99M80, P16591, O14522, Q15262	1229	7	8790	4.08695	1	1	1
GOTERM_MF_DIRECT	GO:0016941	natriuretic peptide receptor activity	4	0.283688	0.0615618	P18910, P16066, P46197, P18293	1229	7	8790	4.08695	1	1	1
GOTERM_MF_DIRECT	GO:0008520	L-ascorbate:sodium symporter activity	4	0.283688	0.0615618	B0JZG0, Q9WTW8, Q9UGH3, Q9UHI7	1229	7	8790	4.08695	1	1	1
GOTERM_MF_DIRECT	GO:0008028	monocarboxylic acid transmembrane transporter activity	7	0.496454	0.0620604	Q8BGC3, Q8R0M8, Q503M4, P53988, Q6P2X9, O95907, Q7RTX9	1229	21	8790	2.38405	1	1	1
GOTERM_MF_DIRECT	GO:0016705	oxidoreductase activity, acting on paired donors, with incorporation or reduction of molecular oxygen	11	0.780142	0.0684415	Q64459, Q09660, O54750, Q9CX98, P24470, Q9VA27, Q9V8M2, Q9GZT9, Q9V5L3, Q6NT55, P48416	1229	43	8790	1.82962	1	1	1
GOTERM_MF_DIRECT	GO:0042805	actinin binding	5	0.35461	0.0743548	Q66HS7, Q04861, Q61143, A2ASS6, O43490	1229	12	8790	2.98007	1	1	1
GOTERM_MF_DIRECT	GO:0043621	protein self-association	9	0.638298	0.0796856	Q9BTV4, Q9UDY8, Q9EQN5, P22366, Q9U1M8, A2ASS6, A5HNF6, Q4R8W3, Q8NEG5	1229	33	8790	1.95059	1	1	1
GOTERM_MF_DIRECT	GO:0005518	collagen binding	9	0.638298	0.0796856	C6KFA3, P23385, P84022, O35186, B8JK39, Q5XIG2, P24367, P06797, A2AX52	1229	33	8790	1.95059	1	1	1
GOTERM_MF_DIRECT	GO:0005085	guanyl-nucleotide exchange factor activity	22	1.56028	0.0817082	Q5BKC9, A2RUS2, Q13972, Q6ZSZ5, O95714, Q1ZXD6, A3KPP3, Q9H8V3, Q13905, O01761, Q76MZ1, Q8WZA2, Q00372, Q8TEU7, Q7L0Q8, Q6DN90, Q14185, Q9UH65, Q9BZ29, Q8IZD9, P98174, Q9WVE9	1229	110	8790	1.43043	1	1	1
GOTERM_MF_DIRECT	GO:0004065	arylsulfatase activity	4	0.283688	0.0885289	P50430, P50429, Q08347, P08842	1229	8	8790	3.57608	1	1	1
GOTERM_MF_DIRECT	GO:0043394	proteoglycan binding	4	0.283688	0.0885289	O70497, O35186, Q5RC46, P06797	1229	8	8790	3.57608	1	1	1
GOTERM_MF_DIRECT	GO:0031267	small GTPase binding	29	2.05674	0.0890096	Q91VR8, O17583, Q8TDW5, P28660, Q7Z3E2, A3KPP3, O15066, Q8BTM8, Q8WZA2, Q8TEU7, P41233, P70705, Q8WWW0, P46940, Q6V7V2, P47736, Q5SSM3, P08228, O01761, Q9H8V3, Q58CS6, Q2IBC1, Q9VF87, P50748, Q96CN9, P16591, Q6P9S0, P98174, Q27J81	1229	155	8790	1.33815	1	1	1
GOTERM_MF_DIRECT	GO:0042910	xenobiotic transporter activity	6	0.425532	0.0949592	P33527, O76082, Q8NBI5, Q3V050, O15439, E9Q236	1229	18	8790	2.38405	1	1	1
GOTERM_MF_DIRECT	GO:0003953	NAD+ nucleosidase activity	3	0.212766	0.0963922	Q6ZUJ8, Q6IDD9, A5HNF6	1229	4	8790	5.36412	1	1	1
GOTERM_MF_DIRECT	GO:0034338	short-chain carboxylesterase activity	3	0.212766	0.0963922	Q9QXM0, Q0VC00, Q5F2F2	1229	4	8790	5.36412	1	1	1
GOTERM_MF_DIRECT	GO:1905060	calcium:cation antiporter activity involved in regulation of postsynaptic cytosolic calcium ion concentration	3	0.212766	0.0963922	P70549, Q9UPR5, S4R2P9	1229	4	8790	5.36412	1	1	1
GOTERM_MF_DIRECT	GO:0016404	15-hydroxyprostaglandin dehydrogenase (NAD+) activity	3	0.212766	0.0963922	Q8VCC1, P15428, O15439	1229	4	8790	5.36412	1	1	1
GOTERM_MF_DIRECT	GO:0005308	creatine transmembrane transporter activity	3	0.212766	0.0963922	Q8BGC3, Q503M4, Q6P2X9	1229	4	8790	5.36412	1	1	1
