# Supplementary material for: Transcriptome profiling combined with network analysis deepens the understanding of immune response mechanisms in blood of pacific oyster Crassostrea gigas infected by Vibrio alginolyticus
Source: Frontiers journal article supplement (doi:10.3389/fmars.2022.1017445), 2022-09-16
Supplement: Data_Sheet_5.XLSX [file Data_Sheet_5.XLSX]

## Sheet: 2n
KEGG_A_class	KEGG_B_class	Pathway	Count (3996)	Pathway ID	Genes	K_IDs
Metabolism	Global and overview maps	Metabolic pathways	1504	ko01100	Cg00049;Cg00195;Cg00238;Cg00276;Cg00277;Cg00288;Cg00308;Cg00309;Cg00319;Cg00380;Cg00382;Cg00581;Cg00659;Cg00661;Cg00710;Cg00802;Cg00958;Cg01018;Cg01139;Cg01163;Cg01179;Cg01192;Cg01193;Cg01194;Cg01202;Cg01256;Cg01299;Cg01300;Cg01355;Cg01356;Cg01716;Cg01910;Cg02120;Cg02143;Cg02300;Cg02301;Cg02302;Cg02323;Cg02329;Cg02330;Cg02332;Cg02345;Cg02356;Cg02363;Cg02366;Cg02371;Cg02374;Cg02456;Cg02457;Cg02490…	K01231+K00726+K11140+K07819+K07819+K00831+K07819+K07819+K00831+K01590+K00718+K12305+K12373+K12373+K11428+K12373+K12373+K00456+K00889+K19787+K21138+K00615+K00615+K00615+K12373+K01772+K01969+K01555+K00698+K00698+K00287+K00698+K00698+K12373+K00503+K00503+K00503+K07819+K00019+K00019+K00019+K00019+K07819+K00019+K00019+K00019+K00019+K12373+K12373+K22470+K00019+K00873+K00861+K15680+K01681+K12373+K00456+…
Environmental Information Processing	Signaling molecules and interaction	Neuroactive ligand-receptor interaction	351	ko04080	Cg01221;Cg01335;Cg01389;Cg01713;Cg01887;Cg02163;Cg02164;Cg02189;Cg02220;Cg02221;Cg02222;Cg02395;Cg02534;Cg02535;Cg02614;Cg02615;Cg02870;Cg02880;Cg02881;Cg02882;Cg02883;Cg03053;Cg03059;Cg03060;Cg03061;Cg03062;Cg03491;Cg03492;Cg03494;Cg03501;Cg03599;Cg03624;Cg03956;Cg04005;Cg04020;Cg04213;Cg04423;Cg04596;Cg04845;Cg05061;Cg05118;Cg05137;Cg05143;Cg05166;Cg05268;Cg05558;Cg05707;Cg05812;Cg05813;Cg05935…	K04194+K04194+K04194+K04261+K04194+K04194+K04194+K08375+K04194+K04194+K04194+K04134+K04194+K04194+K04194+K04194+K04194+K04211+K04211+K04194+K04194+K04194+K04211+K04211+K04194+K04194+K04261+K04263+K04261+K04136+K04218+K05053+K05053+K04282+K04204+K04282+K04809+K05052+K04224+K04282+K04194+K04163+K04194+K04194+K04162+K05052+K04150+K04194+K04194+K04808+K04135+K04284+K03915+K04808+K04808+K04194+K04239+…
Human Diseases	Cancers	Pathways in cancer	346	ko05200	Cg00289;Cg00320;Cg01198;Cg01265;Cg01266;Cg01320;Cg01713;Cg02695;Cg03491;Cg03494;Cg03498;Cg03652;Cg03653;Cg04606;Cg04607;Cg04628;Cg04750;Cg04751;Cg05025;Cg05072;Cg05145;Cg05148;Cg05187;Cg05663;Cg05706;Cg05723;Cg05724;Cg05725;Cg05768;Cg05775;Cg05778;Cg06183;Cg06489;Cg06797;Cg06830;Cg06851;Cg06863;Cg06935;Cg06987;Cg06988;Cg06990;Cg07014;Cg07033;Cg07130;Cg07344;Cg07346;Cg07352;Cg07358;Cg07363;Cg07365…	K02183+K02183+K02085+K02183+K02183+K23605+K04261+K04501+K04261+K04261+K04371+K00799+K00799+K06054+K06054+K08042+K00799+K00799+K04393+K00408+K06051+K06051+K00799+K00922+K00799+K01116+K01116+K01116+K04688+K10140+K02649+K02183+K03915+K06054+K06054+K02183+K06054+K07203+K04513+K04513+K04513+K22182+K02353+K00922+K16060+K16060+K16060+K16060+K16060+K16060+K16060+K16060+K16061+K16061+K16060+K16060+K16060+…
Human Diseases	Neurodegenerative diseases	Alzheimer disease	237	ko05010	Cg00289;Cg00320;Cg01198;Cg01265;Cg01266;Cg03498;Cg03833;Cg03887;Cg03928;Cg03968;Cg03969;Cg04042;Cg04261;Cg04423;Cg04454;Cg05072;Cg05309;Cg05514;Cg05663;Cg05778;Cg06131;Cg06151;Cg06183;Cg06240;Cg06523;Cg06744;Cg06847;Cg06851;Cg06935;Cg07033;Cg07103;Cg07130;Cg09233;Cg09245;Cg09291;Cg09302;Cg09756;Cg09766;Cg10111;Cg10340;Cg10348;Cg10493;Cg11323;Cg11493;Cg11693;Cg11829;Cg11831;Cg12039;Cg12066;Cg12068…	K02183+K02183+K02085+K02183+K02183+K04371+K00235+K02266+K02266+K00411+K00411+K03943+K13240+K04809+K08957+K00408+K08269+K03961+K00922+K02649+K02263+K03097+K02183+K03941+K00413+K09027+K03936+K02183+K07203+K02353+K08333+K00922+K21421+K02354+K03964+K02842+K04526+K02137+K02127+K08683+K08683+K02136+K07374+K04365+K01558+K08683+K00572+K11351+K00182+K11352+K00444+K03173+K02432+K02432+K02432+K06171+K00236+…
Environmental Information Processing	Signal transduction	Calcium signaling pathway	236	ko04020	Cg00289;Cg00320;Cg01221;Cg01265;Cg01266;Cg01335;Cg01389;Cg01887;Cg02163;Cg02164;Cg02220;Cg02221;Cg02222;Cg02534;Cg02535;Cg02614;Cg02615;Cg02870;Cg02880;Cg02881;Cg02882;Cg02883;Cg03053;Cg03059;Cg03060;Cg03061;Cg03062;Cg03501;Cg04005;Cg04213;Cg04261;Cg04423;Cg04628;Cg04845;Cg05061;Cg05118;Cg05137;Cg05143;Cg05166;Cg05268;Cg05707;Cg05723;Cg05724;Cg05725;Cg05812;Cg05813;Cg06183;Cg06190;Cg06489;Cg06684…	K02183+K02183+K04194+K02183+K02183+K04194+K04194+K04194+K04194+K04194+K04194+K04194+K04194+K04194+K04194+K04194+K04194+K04194+K04211+K04211+K04194+K04194+K04194+K04211+K04211+K04194+K04194+K04136+K04282+K04282+K13240+K04809+K08042+K04224+K04282+K04194+K04163+K04194+K04194+K04162+K04150+K01116+K01116+K01116+K04194+K04194+K02183+K04135+K03915+K04194+K02183+K04194+K04194+K04194+K05218+K04194+K04194+…
Human Diseases	Infectious diseases	Human papillomavirus infection	234	ko05165	Cg01198;Cg01403;Cg01713;Cg02593;Cg02711;Cg03277;Cg03491;Cg03494;Cg03498;Cg03902;Cg03942;Cg04454;Cg04606;Cg04607;Cg04681;Cg05025;Cg05072;Cg05092;Cg05321;Cg05561;Cg05663;Cg05731;Cg05768;Cg05778;Cg06280;Cg06797;Cg06830;Cg06863;Cg06935;Cg07033;Cg07130;Cg07998;Cg08309;Cg08310;Cg08311;Cg08923;Cg09245;Cg09302;Cg09517;Cg09611;Cg09987;Cg10587;Cg10589;Cg10660;Cg10662;Cg10664;Cg10665;Cg10666;Cg10669;Cg10672…	K02085+K03120+K04261+K03120+K00873+K03120+K04261+K04261+K04371+K06238+K06238+K08957+K06054+K06054+K06069+K04393+K00408+K16332+K02146+K06493+K00922+K06093+K04688+K02649+K06238+K06054+K06054+K06054+K07203+K02353+K00922+K02150+K04261+K04261+K04261+K06643+K02354+K02842+K14021+K10151+K04261+K06249+K06249+K05636+K05636+K05636+K05636+K05636+K05636+K05636+K05636+K05636+K05636+K05410+K05410+K05410+K05410+…
Cellular Processes	Transport and catabolism	Lysosome	199	ko04142	Cg00256;Cg00257;Cg00258;Cg00259;Cg00581;Cg00659;Cg00661;Cg00802;Cg00958;Cg01019;Cg01173;Cg01202;Cg01570;Cg01590;Cg01591;Cg01790;Cg01818;Cg01820;Cg01840;Cg01848;Cg02143;Cg02456;Cg02457;Cg02910;Cg03175;Cg03488;Cg04081;Cg04278;Cg04318;Cg04325;Cg05321;Cg05387;Cg05506;Cg05554;Cg05569;Cg05600;Cg06189;Cg06610;Cg06612;Cg06886;Cg06950;Cg06958;Cg06959;Cg06960;Cg07089;Cg07108;Cg07109;Cg07291;Cg08462;Cg08982…	K01365+K01365+K01365+K01365+K12305+K12373+K12373+K12373+K12373+K12399+K12400+K12373+K01158+K01158+K01158+K01158+K01158+K01158+K01158+K01158+K12373+K12373+K12373+K12373+K12373+K12350+K12392+K10089+K04646+K06129+K02146+K12301+K12301+K12373+K01052+K12391+K01132+K01197+K01197+K01373+K12373+K12301+K12301+K12301+K01195+K01135+K01135+K01125+K01204+K01052+K12383+K12307+K12383+K12383+K01365+K12389+K12389+…
Cellular Processes	Transport and catabolism	Endocytosis	183	ko04144	Cg00286;Cg00317;Cg00428;Cg00569;Cg00571;Cg00572;Cg01139;Cg01251;Cg01253;Cg01320;Cg01503;Cg01777;Cg02037;Cg03674;Cg04208;Cg04318;Cg04365;Cg04416;Cg04661;Cg04670;Cg04672;Cg04681;Cg04682;Cg04733;Cg04737;Cg05025;Cg05288;Cg05607;Cg05731;Cg05867;Cg06129;Cg06704;Cg06769;Cg06788;Cg06842;Cg06922;Cg06923;Cg06987;Cg06988;Cg06990;Cg07416;Cg07517;Cg07518;Cg07853;Cg07879;Cg07897;Cg07956;Cg08187;Cg08412;Cg08923…	K07905+K07905+K23612+K23612+K23612+K23612+K00889+K07901+K07901+K23605+K07904+K23612+K07904+K12480+K05756+K04646+K12487+K07891+K07937+K12489+K12489+K06069+K10365+K12185+K07876+K04393+K05633+K12197+K06093+K18467+K18468+K17918+K11826+K00910+K00910+K12196+K12196+K04513+K04513+K04513+K12183+K12183+K12183+K07937+K12493+K12192+K23612+K17918+K12191+K06643+K18463+K12959+K01115+K12197+K19476+K12199+K12495+…
Human Diseases	Infectious diseases	Human cytomegalovirus infection	182	ko05163	Cg00289;Cg00320;Cg01265;Cg01266;Cg01713;Cg03491;Cg03494;Cg03498;Cg04628;Cg05561;Cg05663;Cg05768;Cg05778;Cg06183;Cg06851;Cg06935;Cg06987;Cg06988;Cg06990;Cg07130;Cg08309;Cg08310;Cg08311;Cg08923;Cg09517;Cg09987;Cg10565;Cg10720;Cg10724;Cg10730;Cg10736;Cg10739;Cg11230;Cg12265;Cg12266;Cg12848;Cg12849;Cg13241;Cg13748;Cg13966;Cg14822;Cg15512;Cg15517;Cg15518;Cg15522;Cg15826;Cg16257;Cg16377;Cg16689;Cg16690…	K02183+K02183+K02183+K02183+K04261+K04261+K04261+K04371+K08042+K06493+K00922+K04688+K02649+K02183+K02183+K07203+K04513+K04513+K04513+K00922+K04261+K04261+K04261+K06643+K14021+K04261+K08057+K05410+K05410+K05410+K05410+K05410+K04261+K05410+K05410+K05410+K05410+K03173+K08049+K02183+K02183+K11987+K11987+K11987+K03173+K04361+K07206+K02105+K02649+K02649+K07205+K04261+K04261+K04261+K04261+K04261+K04261+…
Environmental Information Processing	Signal transduction	cAMP signaling pathway	173	ko04024	Cg00289;Cg00320;Cg01265;Cg01266;Cg03498;Cg03599;Cg03777;Cg04020;Cg04628;Cg05268;Cg05531;Cg05663;Cg05778;Cg06183;Cg06264;Cg06851;Cg06987;Cg06988;Cg06990;Cg07093;Cg07130;Cg08312;Cg08553;Cg08998;Cg09475;Cg09694;Cg10602;Cg11493;Cg12286;Cg12541;Cg13115;Cg13253;Cg13295;Cg13296;Cg13297;Cg13298;Cg13299;Cg13300;Cg13301;Cg13305;Cg13307;Cg13308;Cg13310;Cg13314;Cg13315;Cg13316;Cg13378;Cg13379;Cg13380;Cg13389…	K02183+K02183+K02183+K02183+K04371+K04218+K00232+K04204+K08042+K04162+K06269+K00922+K02649+K02183+K04284+K02183+K04513+K04513+K04513+K04153+K00922+K04266+K07830+K04160+K01115+K19021+K04284+K04365+K00232+K04145+K04145+K04229+K05673+K05673+K05673+K05673+K05673+K05673+K05673+K05673+K05673+K05673+K05673+K05673+K05673+K05673+K04284+K04284+K04284+K04145+K04498+K04498+K08049+K02183+K02183+K18438+K02649+…
Human Diseases	Infectious disease: viral	Human immunodeficiency virus 1 infection	159	ko05170	Cg00289;Cg00320;Cg01265;Cg01266;Cg03498;Cg04081;Cg05600;Cg05663;Cg05723;Cg05724;Cg05725;Cg05768;Cg05778;Cg06174;Cg06183;Cg06851;Cg06935;Cg07130;Cg08933;Cg08935;Cg08940;Cg08944;Cg09320;Cg09517;Cg09739;Cg10565;Cg10720;Cg10724;Cg10730;Cg10736;Cg10739;Cg12265;Cg12266;Cg12848;Cg12849;Cg13241;Cg13703;Cg13966;Cg14822;Cg15522;Cg15715;Cg16689;Cg16690;Cg17154;Cg17288;Cg17621;Cg17622;Cg17970;Cg18224;Cg18231…	K02183+K02183+K02183+K02183+K04371+K12392+K12391+K00922+K01116+K01116+K01116+K04688+K02649+K05868+K02183+K02183+K07203+K00922+K10159+K10160+K10159+K10159+K10612+K14021+K04427+K08057+K05410+K05410+K05410+K05410+K05410+K05410+K05410+K05410+K05410+K03173+K04431+K02183+K02183+K03173+K03868+K02649+K02649+K03872+K03872+K02183+K02183+K04348+K02677+K04467+K04467+K04392+K12393+K04440+K04448+K08057+K03175+…
Human Diseases	Cardiovascular diseases	Fluid shear stress and atherosclerosis	159	ko05418	Cg00256;Cg00257;Cg00258;Cg00259;Cg00289;Cg00320;Cg01265;Cg01266;Cg03652;Cg03653;Cg04750;Cg04751;Cg05187;Cg05561;Cg05663;Cg05706;Cg05778;Cg06183;Cg06851;Cg06855;Cg06987;Cg06988;Cg06990;Cg07130;Cg08543;Cg08544;Cg08992;Cg09472;Cg09473;Cg09566;Cg09568;Cg09739;Cg09922;Cg11201;Cg11202;Cg11203;Cg11204;Cg11205;Cg11206;Cg11207;Cg11208;Cg11209;Cg11210;Cg11211;Cg11212;Cg11213;Cg11214;Cg11215;Cg11216;Cg11217…	K01365+K01365+K01365+K01365+K02183+K02183+K02183+K02183+K00799+K00799+K00799+K00799+K00799+K06493+K00922+K00799+K02649+K02183+K02183+K08009+K04513+K04513+K04513+K00922+K00799+K00799+K12959+K00799+K00799+K23790+K23790+K04427+K01365+K12959+K12959+K12959+K12959+K12959+K12959+K06278+K06278+K06278+K06278+K06278+K12959+K12959+K12959+K12959+K12959+K12959+K06278+K00799+K00799+K00799+K00799+K04675+K00799+…
Genetic Information Processing	Transcription	Spliceosome	151	ko03040	Cg00981;Cg03800;Cg04518;Cg04538;Cg04547;Cg04965;Cg05038;Cg05408;Cg05640;Cg05752;Cg05971;Cg06047;Cg06087;Cg06323;Cg06361;Cg06534;Cg06535;Cg07423;Cg08359;Cg08433;Cg08694;Cg09469;Cg09514;Cg10524;Cg10606;Cg11185;Cg11827;Cg11925;Cg12533;Cg12599;Cg12795;Cg13359;Cg13671;Cg13772;Cg13919;Cg13920;Cg14038;Cg14039;Cg15141;Cg15192;Cg15507;Cg16050;Cg16632;Cg16701;Cg16935;Cg17393;Cg17505;Cg17506;Cg17507;Cg17918…	K12626+K12831+K12890+K12876+K12890+K11086+K10599+K11088+K12861+K12864+K12875+K12830+K11095+K11087+K09567+K12818+K12818+K12883+K12860+K11097+K12816+K12868+K12827+K12870+K12627+K12843+K11098+K12840+K12865+K12817+K12733+K12831+K12850+K12836+K12812+K12812+K12662+K12662+K12862+K12813+K12867+K12848+K12879+K09564+K12893+K12881+K03283+K03283+K03283+K03283+K12897+K12841+K12841+K12849+K12878+K12834+K11092+…
Human Diseases	Infectious diseases	Tuberculosis	150	ko05152	Cg00289;Cg00320;Cg01265;Cg01266;Cg01541;Cg01542;Cg01745;Cg02028;Cg02064;Cg02067;Cg02068;Cg02075;Cg02118;Cg03498;Cg05167;Cg05231;Cg05321;Cg06183;Cg06851;Cg06987;Cg06988;Cg06990;Cg08283;Cg08652;Cg08933;Cg08935;Cg08940;Cg08944;Cg12839;Cg13172;Cg13213;Cg13407;Cg13740;Cg13746;Cg13884;Cg13966;Cg14822;Cg17248;Cg17249;Cg17443;Cg17444;Cg17621;Cg17622;Cg17964;Cg17970;Cg18447;Cg18484;Cg19085;Cg19540;Cg19600…	K02183+K02183+K02183+K02183+K06563+K06563+K06563+K06563+K06563+K06563+K06563+K06563+K06563+K04371+K06560+K06563+K02146+K02183+K02183+K04513+K04513+K04513+K06563+K06563+K10159+K10160+K10159+K10159+K03662+K06560+K07888+K07889+K04498+K04498+K02155+K02183+K02183+K04718+K04718+K04718+K04718+K02183+K02183+K04515+K04348+K03661+K04440+K05704+K03175+K02580+K02154+K02154+K02144+K06560+K06560+K02154+K02183+…
Environmental Information Processing	Signal transduction	Ras signaling pathway	148	ko04014	Cg00289;Cg00320;Cg01265;Cg01266;Cg03498;Cg04180;Cg04551;Cg05025;Cg05137;Cg05663;Cg05723;Cg05724;Cg05725;Cg05778;Cg05941;Cg06183;Cg06207;Cg06208;Cg06851;Cg06987;Cg06988;Cg06990;Cg07130;Cg08553;Cg09187;Cg09475;Cg09695;Cg09756;Cg10720;Cg10724;Cg10730;Cg10736;Cg10739;Cg12265;Cg12266;Cg12848;Cg12849;Cg13213;Cg13407;Cg13966;Cg14427;Cg14428;Cg14429;Cg14430;Cg14822;Cg15519;Cg15826;Cg16689;Cg16690;Cg17616…	K02183+K02183+K02183+K02183+K04371+K01047+K01047+K04393+K04163+K00922+K01116+K01116+K01116+K02649+K01047+K02183+K01047+K01047+K02183+K04513+K04513+K04513+K00922+K07830+K16817+K01115+K01047+K04526+K05410+K05410+K05410+K05410+K05410+K05410+K05410+K05410+K05410+K07888+K07889+K02183+K16817+K16817+K16817+K16817+K02183+K16342+K04361+K02649+K02649+K04364+K02183+K02183+K05210+K02677+K04467+K04467+K04392+…
Genetic Information Processing	Folding, sorting and degradation	Ubiquitin mediated proteolysis	145	ko04120	Cg03308;Cg03309;Cg03310;Cg03621;Cg03880;Cg03921;Cg04250;Cg04350;Cg04352;Cg04509;Cg04667;Cg04799;Cg04866;Cg05038;Cg05188;Cg05252;Cg05261;Cg05288;Cg05775;Cg06042;Cg06241;Cg06405;Cg06888;Cg07344;Cg07346;Cg07352;Cg07358;Cg07363;Cg07365;Cg07368;Cg07641;Cg07804;Cg07837;Cg07898;Cg07899;Cg07900;Cg07910;Cg07911;Cg08212;Cg08736;Cg08923;Cg09085;Cg09116;Cg09285;Cg09320;Cg09336;Cg09542;Cg10056;Cg11241;Cg11293…	K08285+K08285+K08285+K03352+K10598+K10598+K06688+K10582+K10582+K10608+K10597+K10575+K08285+K10599+K10447+K04552+K10264+K05633+K10140+K10447+K10588+K10685+K04554+K16060+K16060+K16060+K16060+K16060+K16060+K16060+K16060+K16061+K16061+K16060+K16060+K16060+K16060+K16060+K16060+K10260+K06643+K16060+K10578+K16061+K10612+K16060+K16061+K04556+K03178+K03178+K03178+K10447+K10580+K10260+K10686+K10579+K04649+…
Organismal Systems	Sensory system	Inflammatory mediator regulation of TRP channels	145	ko04750	Cg00289;Cg00320;Cg01265;Cg01266;Cg01713;Cg03491;Cg03494;Cg04628;Cg05531;Cg05663;Cg05723;Cg05724;Cg05725;Cg05778;Cg06183;Cg06489;Cg06851;Cg07130;Cg08309;Cg08310;Cg08311;Cg09987;Cg11058;Cg11230;Cg13748;Cg13966;Cg14822;Cg15519;Cg16689;Cg16690;Cg17176;Cg17177;Cg17178;Cg17179;Cg17180;Cg17181;Cg17309;Cg17310;Cg17311;Cg17312;Cg17313;Cg17314;Cg17315;Cg17621;Cg17622;Cg17964;Cg18015;Cg18224;Cg18304;Cg18305…	K02183+K02183+K02183+K02183+K04261+K04261+K04261+K08042+K06269+K00922+K01116+K01116+K01116+K02649+K02183+K03915+K02183+K00922+K04261+K04261+K04261+K04261+K04149+K04261+K08049+K02183+K02183+K16342+K02649+K02649+K04261+K04261+K04261+K04261+K04261+K04261+K04261+K04261+K04261+K04261+K04261+K04261+K04261+K02183+K02183+K04515+K04261+K02677+K04261+K04261+K04261+K04261+K04345+K04345+K04261+K04440+K04261+…
Organismal Systems	Digestive system	Pancreatic secretion	140	ko04972	Cg01221;Cg01251;Cg01253;Cg01335;Cg01389;Cg01503;Cg01887;Cg02037;Cg02163;Cg02164;Cg02220;Cg02221;Cg02222;Cg02534;Cg02535;Cg02614;Cg02615;Cg02870;Cg02882;Cg02883;Cg03053;Cg03061;Cg03062;Cg04180;Cg04551;Cg04628;Cg04918;Cg04919;Cg05118;Cg05143;Cg05166;Cg05812;Cg05813;Cg05941;Cg06207;Cg06208;Cg06454;Cg06684;Cg06861;Cg06865;Cg06987;Cg06988;Cg06990;Cg07091;Cg07509;Cg07813;Cg08671;Cg08685;Cg08696;Cg09008…	K04194+K07901+K07901+K04194+K04194+K07904+K04194+K07904+K04194+K04194+K04194+K04194+K04194+K04194+K04194+K04194+K04194+K04194+K04194+K04194+K04194+K04194+K04194+K01047+K01047+K08042+K01176+K01176+K04194+K04194+K04194+K04194+K04194+K01047+K01047+K01047+K14074+K04194+K04194+K04194+K04513+K04513+K04513+K04194+K04194+K04194+K04194+K04194+K04194+K04194+K14073+K14073+K14073+K14073+K01047+K04194+K04194+…
Environmental Information Processing	Signal transduction	PI3K-Akt signaling pathway	139	ko04151	Cg03498;Cg03744;Cg03745;Cg03902;Cg03942;Cg05092;Cg05561;Cg05663;Cg05768;Cg05778;Cg06280;Cg06935;Cg07130;Cg07863;Cg08923;Cg08933;Cg08935;Cg08940;Cg08944;Cg09611;Cg09756;Cg10587;Cg10589;Cg10660;Cg10662;Cg10664;Cg10665;Cg10666;Cg10669;Cg10672;Cg10673;Cg10676;Cg10679;Cg11510;Cg13053;Cg13065;Cg14014;Cg14642;Cg14784;Cg15579;Cg15644;Cg15826;Cg16257;Cg16337;Cg16358;Cg16359;Cg16363;Cg16689;Cg16690;Cg16833…	K04371+K01596+K01596+K06238+K06238+K16332+K06493+K00922+K04688+K02649+K06238+K07203+K00922+K09408+K06643+K10159+K10160+K10159+K10159+K10151+K04526+K06249+K06249+K05636+K05636+K05636+K05636+K05636+K05636+K05636+K05636+K05636+K05636+K05717+K03456+K03456+K06238+K06238+K05635+K07298+K06238+K04361+K07206+K06238+K06238+K06238+K06238+K02649+K02649+K06240+K07298+K07204+K08266+K07205+K06238+K04364+K02677+…
Human Diseases	Cancers	Proteoglycans in cancer	138	ko05205	Cg00256;Cg00257;Cg00258;Cg00259;Cg03498;Cg05025;Cg05072;Cg05531;Cg05561;Cg05663;Cg05723;Cg05724;Cg05725;Cg05768;Cg05778;Cg06935;Cg06987;Cg06988;Cg06990;Cg07130;Cg08553;Cg08923;Cg08933;Cg08935;Cg08940;Cg08944;Cg08992;Cg09245;Cg09302;Cg09922;Cg11201;Cg11202;Cg11203;Cg11204;Cg11205;Cg11206;Cg11207;Cg11208;Cg11209;Cg11210;Cg11211;Cg11212;Cg11213;Cg11214;Cg11215;Cg11216;Cg11217;Cg11220;Cg11493;Cg11510…	K01365+K01365+K01365+K01365+K04371+K04393+K00408+K06269+K06493+K00922+K01116+K01116+K01116+K04688+K02649+K07203+K04513+K04513+K04513+K00922+K07830+K06643+K10159+K10160+K10159+K10159+K12959+K02354+K02842+K01365+K12959+K12959+K12959+K12959+K12959+K12959+K06278+K06278+K06278+K06278+K06278+K12959+K12959+K12959+K12959+K12959+K12959+K06278+K04365+K05717+K01558+K00572+K00182+K00444+K03685+K02432+K02432+…
Cellular Processes	Cellular community - eukaryotes	Focal adhesion	136	ko04510	Cg03498;Cg03902;Cg03942;Cg05025;Cg05531;Cg05561;Cg05663;Cg05778;Cg06280;Cg06987;Cg06988;Cg06990;Cg07130;Cg07344;Cg07346;Cg07352;Cg07358;Cg07363;Cg07365;Cg07368;Cg07641;Cg07898;Cg07899;Cg07900;Cg07910;Cg07911;Cg08212;Cg08992;Cg09085;Cg09336;Cg09611;Cg10587;Cg10589;Cg10660;Cg10662;Cg10664;Cg10665;Cg10666;Cg10669;Cg10672;Cg10673;Cg10676;Cg10679;Cg11201;Cg11202;Cg11203;Cg11204;Cg11205;Cg11206;Cg11207…	K04371+K06238+K06238+K04393+K06269+K06493+K00922+K02649+K06238+K04513+K04513+K04513+K00922+K16060+K16060+K16060+K16060+K16060+K16060+K16060+K16060+K16060+K16060+K16060+K16060+K16060+K16060+K12959+K16060+K16060+K10151+K06249+K06249+K05636+K05636+K05636+K05636+K05636+K05636+K05636+K05636+K05636+K05636+K12959+K12959+K12959+K12959+K12959+K12959+K06278+K06278+K06278+K06278+K06278+K12959+K12959+K12959+…
Cellular Processes	Cell growth and death	Cellular senescence	133	ko04218	Cg00289;Cg00320;Cg01265;Cg01266;Cg01320;Cg03498;Cg04302;Cg05092;Cg05531;Cg05663;Cg05778;Cg06059;Cg06174;Cg06183;Cg06851;Cg06935;Cg07130;Cg07863;Cg08553;Cg08824;Cg08923;Cg09611;Cg11656;Cg13270;Cg13966;Cg14590;Cg14822;Cg15130;Cg16257;Cg16283;Cg16689;Cg16690;Cg16971;Cg16973;Cg17066;Cg17621;Cg17622;Cg17970;Cg18504;Cg18551;Cg19034;Cg19366;Cg19391;Cg19393;Cg19397;Cg19497;Cg19600;Cg20596;Cg20920;Cg20986…	K02183+K02183+K02183+K02183+K23605+K04371+K10867+K16332+K06269+K00922+K02649+K10867+K05868+K02183+K02183+K07203+K00922+K09408+K07830+K10867+K06643+K10151+K10867+K04674+K02183+K10867+K02183+K14381+K07206+K10866+K02649+K02649+K04402+K04402+K07205+K02183+K02183+K04348+K11411+K07207+K01110+K04377+K04402+K04402+K04402+K06269+K02580+K02183+K02206+K02183+K02183+K02183+K02183+K02183+K02183+K07208+K02183+…
Human Diseases	Infectious diseases	Kaposi sarcoma-associated herpesvirus infection	133	ko05167	Cg00289;Cg00320;Cg01265;Cg01266;Cg03498;Cg04873;Cg05663;Cg05723;Cg05724;Cg05725;Cg05778;Cg06183;Cg06469;Cg06851;Cg06935;Cg07130;Cg09517;Cg10720;Cg10724;Cg10730;Cg10736;Cg10739;Cg12265;Cg12266;Cg12848;Cg12849;Cg13241;Cg13703;Cg13708;Cg13740;Cg13746;Cg13966;Cg14822;Cg15512;Cg15517;Cg15518;Cg15522;Cg16377;Cg16689;Cg16690;Cg17621;Cg17622;Cg17970;Cg18231;Cg18232;Cg18252;Cg18484;Cg18698;Cg19085;Cg19366…	K02183+K02183+K02183+K02183+K04371+K08341+K00922+K01116+K01116+K01116+K02649+K02183+K08341+K02183+K07203+K00922+K14021+K05410+K05410+K05410+K05410+K05410+K05410+K05410+K05410+K05410+K03173+K04431+K08334+K04498+K04498+K02183+K02183+K11987+K11987+K11987+K03173+K02105+K02649+K02649+K02183+K02183+K04348+K04467+K04467+K04392+K04440+K04448+K05704+K04377+K02580+K02183+K02159+K02183+K02183+K02183+K02183+…
Organismal Systems	Endocrine system	Insulin signaling pathway	131	ko04910	Cg00289;Cg00320;Cg01265;Cg01266;Cg03498;Cg03744;Cg03745;Cg04681;Cg05531;Cg05663;Cg05768;Cg05778;Cg05858;Cg06183;Cg06851;Cg06935;Cg07130;Cg08640;Cg09756;Cg11493;Cg13966;Cg14822;Cg15786;Cg15787;Cg16257;Cg16689;Cg16690;Cg17011;Cg17066;Cg17616;Cg17621;Cg17622;Cg17684;Cg18444;Cg18445;Cg18484;Cg18495;Cg18551;Cg18875;Cg19497;Cg19588;Cg19716;Cg19962;Cg20113;Cg20128;Cg20129;Cg20596;Cg20986;Cg21123;Cg21124…	K02183+K02183+K02183+K02183+K04371+K01596+K01596+K06069+K06269+K00922+K04688+K02649+K00665+K02183+K02183+K07203+K00922+K00688+K04526+K04365+K02183+K02183+K04707+K04707+K07206+K02649+K02649+K07204+K07205+K04364+K02183+K02183+K00665+K04345+K04345+K04440+K00665+K07207+K03259+K06269+K06276+K07198+K07198+K00693+K16172+K16172+K02183+K02183+K02183+K02183+K02183+K02183+K02183+K07208+K02183+K07827+K07827+…
Environmental Information Processing	Signal transduction	Phosphatidylinositol signaling system	127	ko04070	Cg00289;Cg00320;Cg01139;Cg01265;Cg01266;Cg03886;Cg03927;Cg05184;Cg05626;Cg05663;Cg05723;Cg05724;Cg05725;Cg05778;Cg06183;Cg06569;Cg06851;Cg07130;Cg07242;Cg09100;Cg09104;Cg09365;Cg11105;Cg11380;Cg11385;Cg13149;Cg13455;Cg13966;Cg14145;Cg14822;Cg16629;Cg16689;Cg16690;Cg16842;Cg17605;Cg17621;Cg17622;Cg18110;Cg18224;Cg18342;Cg18946;Cg19034;Cg20358;Cg20359;Cg20596;Cg20986;Cg21123;Cg21124;Cg21274;Cg21408…	K02183+K02183+K00889+K02183+K02183+K00888+K00888+K13084+K18082+K00922+K01116+K01116+K01116+K02649+K02183+K21797+K02183+K00922+K01092+K00901+K00901+K13024+K18086+K10572+K10572+K18081+K20278+K02183+K00911+K02183+K18083+K02649+K02649+K07756+K00915+K02183+K02183+K00981+K02677+K00901+K15759+K01110+K19801+K00901+K02183+K02183+K02183+K02183+K05857+K00921+K00921+K00901+K02183+K00923+K02183+K02183+K20279+…
Genetic Information Processing	Translation	RNA transport	126	ko03013	Cg01223;Cg04538;Cg04760;Cg04792;Cg04794;Cg04820;Cg04921;Cg04977;Cg05079;Cg05156;Cg05564;Cg05653;Cg05971;Cg06628;Cg06666;Cg06716;Cg06939;Cg07318;Cg07423;Cg07592;Cg07659;Cg07701;Cg08431;Cg08470;Cg09511;Cg09530;Cg10278;Cg10527;Cg11239;Cg11751;Cg11797;Cg13436;Cg13782;Cg13919;Cg13920;Cg13931;Cg13932;Cg13997;Cg14043;Cg14063;Cg14118;Cg14527;Cg14999;Cg15547;Cg15736;Cg16044;Cg16127;Cg16288;Cg16303;Cg16518…	K14307+K12876+K14316+K03260+K03260+K03260+K14318+K14530+K03239+K02516+K13175+K03252+K12875+K14299+K03538+K14309+K03238+K13171+K12883+K14305+K14305+K14310+K14324+K14302+K03242+K03236+K14327+K14529+K13176+K13131+K13131+K14319+K14297+K12812+K12812+K05749+K05749+K14306+K13132+K14317+K12160+K03248+K14323+K03113+K14308+K03243+K13133+K03249+K12172+K13136+K14311+K03240+K12879+K03241+K03237+K14315+K07205+…
Human Diseases	Neurodegenerative diseases	Huntington disease	126	ko05016	Cg01403;Cg02593;Cg03277;Cg03833;Cg03887;Cg03928;Cg03968;Cg03969;Cg04042;Cg04318;Cg05309;Cg05514;Cg05612;Cg05910;Cg05929;Cg05930;Cg06131;Cg06240;Cg06523;Cg06769;Cg06847;Cg06935;Cg07103;Cg07270;Cg08305;Cg08594;Cg09263;Cg09291;Cg09319;Cg09766;Cg10111;Cg10493;Cg11323;Cg12008;Cg12039;Cg12068;Cg13241;Cg13423;Cg13445;Cg13457;Cg13703;Cg13708;Cg13740;Cg13746;Cg14029;Cg14034;Cg14919;Cg15296;Cg15522;Cg15817…	K03120+K03120+K03120+K00235+K02266+K02266+K00411+K00411+K03943+K04646+K08269+K03961+K03011+K04560+K03129+K03129+K02263+K03941+K00413+K11826+K03936+K07203+K08333+K03008+K04565+K00432+K04564+K03964+K03014+K02137+K02127+K02136+K07374+K03120+K11351+K11352+K03173+K00236+K07374+K07375+K04431+K08334+K04498+K04498+K03935+K03016+K03949+K08331+K03173+K03959+K19730+K19730+K02134+K00415+K05210+K07374+K07374+…
Environmental Information Processing	Signal transduction	Rap1 signaling pathway	125	ko04015	Cg00289;Cg00320;Cg01265;Cg01266;Cg03498;Cg04628;Cg04681;Cg05025;Cg05561;Cg05663;Cg05723;Cg05724;Cg05725;Cg05731;Cg05778;Cg06183;Cg06851;Cg06987;Cg06988;Cg06990;Cg07130;Cg08312;Cg09756;Cg11493;Cg12541;Cg13115;Cg13389;Cg13681;Cg13748;Cg13966;Cg14822;Cg15826;Cg16377;Cg16689;Cg16690;Cg17621;Cg17622;Cg17749;Cg18224;Cg18252;Cg19085;Cg20596;Cg20986;Cg21123;Cg21124;Cg21518;Cg21950;Cg22232;Cg22449;Cg22592…	K02183+K02183+K02183+K02183+K04371+K08042+K06069+K04393+K06493+K00922+K01116+K01116+K01116+K06093+K02649+K02183+K02183+K04513+K04513+K04513+K00922+K04266+K04526+K04365+K04145+K04145+K04145+K05692+K08049+K02183+K02183+K04361+K02105+K02649+K02649+K02183+K02183+K05210+K02677+K04392+K05704+K02183+K02183+K02183+K02183+K02183+K02183+K02183+K02183+K07827+K07827+K02183+K02183+K02183+K02183+K02183+K04392+…
Organismal Systems	Immune system	C-type lectin receptor signaling pathway	122	ko04625	Cg00289;Cg00320;Cg01265;Cg01266;Cg01541;Cg01542;Cg01745;Cg02028;Cg02064;Cg02067;Cg02068;Cg02075;Cg02118;Cg03498;Cg05231;Cg05663;Cg05778;Cg06183;Cg06851;Cg06987;Cg06988;Cg06990;Cg07130;Cg08283;Cg08553;Cg08652;Cg08923;Cg13966;Cg14822;Cg15512;Cg15517;Cg15518;Cg16689;Cg16690;Cg17621;Cg17622;Cg17970;Cg18231;Cg18232;Cg18484;Cg18698;Cg19085;Cg19600;Cg20596;Cg20986;Cg21123;Cg21124;Cg21518;Cg21950;Cg22232…	K02183+K02183+K02183+K02183+K06563+K06563+K06563+K06563+K06563+K06563+K06563+K06563+K06563+K04371+K06563+K00922+K02649+K02183+K02183+K04513+K04513+K04513+K00922+K06563+K07830+K06563+K06643+K02183+K02183+K11987+K11987+K11987+K02649+K02649+K02183+K02183+K04348+K04467+K04467+K04440+K04448+K05704+K02580+K02183+K02183+K02183+K02183+K02183+K02183+K02183+K02183+K07827+K07827+K02183+K02183+K02183+K02183+…
Human Diseases	Infectious diseases	Shigellosis	121	ko05131	Cg00428;Cg00569;Cg00571;Cg00572;Cg01777;Cg03498;Cg04208;Cg04661;Cg04873;Cg05025;Cg05663;Cg05723;Cg05724;Cg05725;Cg05768;Cg05778;Cg06469;Cg06935;Cg06987;Cg06988;Cg06990;Cg07103;Cg07130;Cg07853;Cg07863;Cg07956;Cg08923;Cg08935;Cg09535;Cg09739;Cg10418;Cg10720;Cg10724;Cg10730;Cg10736;Cg10739;Cg11137;Cg12252;Cg12265;Cg12266;Cg12848;Cg12849;Cg13241;Cg13681;Cg13708;Cg13772;Cg14329;Cg15130;Cg15280;Cg15522…	K23612+K23612+K23612+K23612+K23612+K04371+K05756+K07937+K08341+K04393+K00922+K01116+K01116+K01116+K04688+K02649+K08341+K07203+K04513+K04513+K04513+K08333+K00922+K07937+K09408+K23612+K06643+K10160+K08339+K04427+K23612+K05410+K05410+K05410+K05410+K05410+K05755+K10580+K05410+K05410+K05410+K05410+K03173+K05692+K08334+K12836+K05740+K14381+K05754+K03173+K03868+K04361+K02649+K02649+K07204+K06689+K07937+…
Genetic Information Processing	Folding, sorting and degradation	Protein processing in endoplasmic reticulum	119	ko04141	Cg00071;Cg01158;Cg03817;Cg03823;Cg04186;Cg04643;Cg04650;Cg04667;Cg04799;Cg05251;Cg05379;Cg05517;Cg05604;Cg05729;Cg06633;Cg06674;Cg06744;Cg06888;Cg06928;Cg06984;Cg07029;Cg07141;Cg07160;Cg07577;Cg07640;Cg07896;Cg09116;Cg09510;Cg09517;Cg10056;Cg10565;Cg10760;Cg10797;Cg11156;Cg11246;Cg11717;Cg12814;Cg13147;Cg13241;Cg13411;Cg13703;Cg13990;Cg14002;Cg14077;Cg14166;Cg14526;Cg14529;Cg14677;Cg14832;Cg15152…	K10080+K09502+K09503+K09503+K11519+K16194+K09586+K10597+K10575+K13989+K12670+K12670+K10636+K09584+K13249+K08653+K09027+K04554+K12275+K10661+K10666+K13251+K14016+K01230+K01230+K09540+K10578+K07765+K14021+K04556+K08057+K14009+K14009+K12666+K14011+K04571+K10956+K09490+K03173+K09486+K04431+K09530+K04555+K08054+K10086+K23741+K09490+K09481+K12669+K09555+K03173+K03868+K13525+K03237+K06689+K14018+K03283+…
Organismal Systems	Circulatory system	Vascular smooth muscle contraction	119	ko04270	Cg00289;Cg00320;Cg01265;Cg01266;Cg03492;Cg03498;Cg03501;Cg04031;Cg04168;Cg04180;Cg04551;Cg04628;Cg05531;Cg05941;Cg06183;Cg06190;Cg06207;Cg06208;Cg06851;Cg06987;Cg06988;Cg06990;Cg08312;Cg09695;Cg10177;Cg11493;Cg13748;Cg13808;Cg13809;Cg13966;Cg14822;Cg15443;Cg15519;Cg17621;Cg17622;Cg18224;Cg18444;Cg18445;Cg19497;Cg19823;Cg19945;Cg20596;Cg20986;Cg21034;Cg21123;Cg21124;Cg21518;Cg21950;Cg22232;Cg22449…	K02183+K02183+K02183+K02183+K04263+K04371+K04136+K12319+K12324+K01047+K01047+K08042+K06269+K01047+K02183+K04135+K01047+K01047+K02183+K04513+K04513+K04513+K04266+K01047+K04136+K04365+K08049+K12318+K12319+K02183+K02183+K04226+K16342+K02183+K02183+K02677+K04345+K04345+K06269+K01047+K04263+K02183+K02183+K04577+K02183+K02183+K02183+K02183+K02183+K02183+K02183+K02183+K02183+K02183+K02183+K05242+K16342+…
Organismal Systems	Endocrine system	Renin secretion	119	ko04924	Cg00289;Cg00320;Cg01265;Cg01266;Cg01713;Cg03491;Cg03494;Cg04031;Cg06183;Cg06851;Cg08309;Cg08310;Cg08311;Cg09694;Cg09987;Cg11230;Cg13118;Cg13808;Cg13809;Cg13966;Cg14822;Cg17176;Cg17177;Cg17178;Cg17179;Cg17180;Cg17181;Cg17309;Cg17310;Cg17311;Cg17312;Cg17313;Cg17314;Cg17315;Cg17621;Cg17622;Cg17970;Cg18015;Cg18304;Cg18305;Cg18306;Cg18309;Cg18444;Cg18445;Cg18472;Cg18573;Cg18646;Cg18892;Cg19073;Cg19543…	K02183+K02183+K02183+K02183+K04261+K04261+K04261+K12319+K02183+K02183+K04261+K04261+K04261+K19021+K04261+K04261+K13755+K12318+K12319+K02183+K02183+K04261+K04261+K04261+K04261+K04261+K04261+K04261+K04261+K04261+K04261+K04261+K04261+K04261+K02183+K02183+K04348+K04261+K04261+K04261+K04261+K04261+K04345+K04345+K04261+K04261+K04261+K04261+K04261+K04141+K04261+K04261+K04261+K02183+K02183+K02183+K02183+…
Organismal Systems	Endocrine system	Melanogenesis	118	ko04916	Cg00289;Cg00320;Cg01265;Cg01266;Cg03498;Cg04628;Cg05072;Cg05206;Cg05207;Cg05957;Cg06183;Cg06851;Cg07033;Cg08270;Cg09245;Cg09302;Cg11693;Cg11831;Cg12066;Cg12731;Cg12732;Cg12756;Cg12757;Cg12985;Cg13409;Cg13416;Cg13417;Cg13740;Cg13746;Cg13748;Cg13966;Cg14664;Cg14667;Cg14822;Cg16189;Cg16190;Cg16191;Cg16192;Cg16377;Cg17621;Cg17622;Cg17964;Cg18224;Cg18444;Cg18445;Cg18579;Cg19083;Cg20387;Cg20388;Cg20596…	K02183+K02183+K02183+K02183+K04371+K08042+K00408+K00505+K00505+K00505+K02183+K02183+K02353+K00505+K02354+K02842+K01558+K00572+K00182+K09455+K09455+K09455+K09455+K00444+K02432+K02432+K02432+K04498+K04498+K08049+K02183+K02375+K02375+K02183+K01064+K03209+K00445+K01357+K02105+K02183+K02183+K04515+K02677+K04345+K04345+K00714+K04491+K00505+K00505+K02183+K02183+K02183+K02183+K02183+K02183+K02183+K02183+…
Cellular Processes	Transport and catabolism	Autophagy - animal	117	ko04140	Cg00256;Cg00257;Cg00258;Cg00259;Cg01251;Cg01253;Cg03498;Cg04873;Cg05309;Cg05626;Cg05663;Cg05684;Cg05768;Cg05778;Cg06469;Cg06848;Cg06935;Cg07103;Cg07130;Cg08553;Cg08688;Cg09535;Cg09739;Cg09756;Cg09922;Cg10720;Cg10724;Cg10730;Cg10736;Cg10739;Cg11105;Cg12265;Cg12266;Cg12749;Cg12773;Cg12848;Cg12849;Cg13708;Cg13955;Cg14358;Cg15130;Cg15296;Cg15579;Cg15631;Cg15849;Cg15897;Cg16257;Cg16406;Cg16689;Cg16690…	K01365+K01365+K01365+K01365+K07901+K07901+K04371+K08341+K08269+K18082+K00922+K21248+K04688+K02649+K08341+K08509+K07203+K08333+K00922+K07830+K07925+K08339+K04427+K04526+K01365+K05410+K05410+K05410+K05410+K05410+K18086+K05410+K05410+K08337+K08337+K05410+K05410+K08334+K07920+K01365+K14381+K08331+K07298+K08491+K19730+K19730+K07206+K11248+K02649+K02649+K07298+K03237+K20402+K07204+K08266+K08342+K17888+…
Environmental Information Processing	Signal transduction	mTOR signaling pathway	116	ko04150	Cg03498;Cg03966;Cg04046;Cg04047;Cg04676;Cg04678;Cg05072;Cg05309;Cg05663;Cg05768;Cg05778;Cg05988;Cg06157;Cg06628;Cg06852;Cg06853;Cg06935;Cg06987;Cg06988;Cg06990;Cg07033;Cg07130;Cg07998;Cg08463;Cg09245;Cg09302;Cg09481;Cg09617;Cg09756;Cg11493;Cg11693;Cg11831;Cg12066;Cg12891;Cg12985;Cg13409;Cg13416;Cg13417;Cg13529;Cg13776;Cg14589;Cg14664;Cg14667;Cg15579;Cg15609;Cg15634;Cg16189;Cg16190;Cg16191;Cg16192…	K04371+K20405+K20404+K20404+K20403+K20403+K00408+K08269+K00922+K04688+K02649+K10421+K20409+K14299+K13780+K13780+K07203+K04513+K04513+K04513+K02353+K00922+K02150+K11137+K02354+K02842+K04373+K20411+K04526+K04365+K01558+K00572+K00182+K16344+K00444+K02432+K02432+K02432+K13780+K20397+K13780+K02375+K02375+K07298+K02152+K20410+K01064+K03209+K00445+K01357+K07206+K02145+K03068+K03875+K02649+K02649+K14995+…
Organismal Systems	Endocrine system	Oxytocin signaling pathway	116	ko04921	Cg00289;Cg00320;Cg01265;Cg01266;Cg03498;Cg04031;Cg04168;Cg04628;Cg05531;Cg06183;Cg06851;Cg06987;Cg06988;Cg06990;Cg13253;Cg13681;Cg13748;Cg13808;Cg13809;Cg13966;Cg14822;Cg15512;Cg15517;Cg15518;Cg15519;Cg15826;Cg17621;Cg17622;Cg17964;Cg17970;Cg18224;Cg18444;Cg18445;Cg18698;Cg19085;Cg19497;Cg19716;Cg19962;Cg20596;Cg20986;Cg21123;Cg21124;Cg21518;Cg21950;Cg22232;Cg22449;Cg22592;Cg22688;Cg22867;Cg22872…	K02183+K02183+K02183+K02183+K04371+K12319+K12324+K08042+K06269+K02183+K02183+K04513+K04513+K04513+K04229+K05692+K08049+K12318+K12319+K02183+K02183+K11987+K11987+K11987+K16342+K04361+K02183+K02183+K04515+K04348+K02677+K04345+K04345+K04448+K05704+K06269+K07198+K07198+K02183+K02183+K02183+K02183+K02183+K02183+K02183+K02183+K07827+K07827+K02183+K02183+K02183+K02183+K02183+K16342+K16342+K02183+K12319+…
Genetic Information Processing	Translation	Ribosome	115	ko03010	Cg01199;Cg01210;Cg03485;Cg03841;Cg04048;Cg04155;Cg04316;Cg05237;Cg05405;Cg05606;Cg05943;Cg06118;Cg06142;Cg06770;Cg08464;Cg08479;Cg08697;Cg08846;Cg08912;Cg09588;Cg09765;Cg09926;Cg10029;Cg10053;Cg10073;Cg10184;Cg10605;Cg12838;Cg13055;Cg13063;Cg13463;Cg13584;Cg13615;Cg13908;Cg13996;Cg14133;Cg14142;Cg14577;Cg14600;Cg14612;Cg14944;Cg15060;Cg15250;Cg15281;Cg15286;Cg15454;Cg15658;Cg15800;Cg16182;Cg17255…	K02978+K02888+K02893+K02935+K02878+K02934+K02943+K02881+K02887+K02961+K02873+K02906+K02875+K02891+K02896+K02865+K02929+K02987+K02996+K02939+K02990+K02956+K02892+K02872+K02884+K02882+K02886+K02973+K02976+K02976+K02890+K02907+K02985+K02902+K02970+K02975+K02927+K02940+K02966+K02966+K02895+K02879+K02984+K02918+K02932+K02936+K02989+K02967+K02964+K02915+K02915+K02876+K02876+K02981+K02969+K02899+K02992+…
Organismal Systems	Nervous system	Neurotrophin signaling pathway	115	ko04722	Cg00289;Cg00320;Cg01265;Cg01266;Cg03498;Cg05025;Cg05663;Cg05723;Cg05724;Cg05725;Cg05778;Cg06183;Cg06851;Cg06987;Cg06988;Cg06990;Cg07130;Cg07863;Cg09481;Cg11493;Cg12971;Cg13703;Cg13966;Cg14822;Cg16689;Cg16690;Cg17616;Cg17621;Cg17622;Cg17964;Cg18252;Cg18426;Cg18484;Cg18698;Cg19540;Cg19588;Cg19600;Cg19904;Cg20128;Cg20129;Cg20596;Cg20608;Cg20986;Cg21123;Cg21124;Cg21518;Cg21950;Cg22232;Cg22409;Cg22449…	K02183+K02183+K02183+K02183+K04371+K04393+K00922+K01116+K01116+K01116+K02649+K02183+K02183+K04513+K04513+K04513+K00922+K09408+K04373+K04365+K12388+K04431+K02183+K02183+K02649+K02649+K04364+K02183+K02183+K04515+K04392+K04416+K04440+K04448+K03175+K06276+K02580+K04374+K16172+K16172+K02183+K02159+K02183+K02183+K02183+K02183+K02183+K02183+K03175+K02183+K07827+K07827+K02183+K02183+K02183+K02183+K02183+…
Organismal Systems	Nervous system	Dopaminergic synapse	115	ko04728	Cg00289;Cg00320;Cg01265;Cg01266;Cg05531;Cg06183;Cg06851;Cg07361;Cg12541;Cg13053;Cg13065;Cg13115;Cg13389;Cg13966;Cg14520;Cg14822;Cg17621;Cg17622;Cg17749;Cg17964;Cg17970;Cg18224;Cg18249;Cg18444;Cg18445;Cg18484;Cg19497;Cg19756;Cg19904;Cg20596;Cg20986;Cg21123;Cg21124;Cg21518;Cg21894;Cg21950;Cg22232;Cg22449;Cg22867;Cg22872;Cg22873;Cg22874;Cg22875;Cg23369;Cg23508;Cg23509;Cg23521;Cg23522;Cg23604;Cg23987…	K02183+K02183+K02183+K02183+K06269+K02183+K02183+K00501+K04145+K03456+K03456+K04145+K04145+K02183+K01593+K02183+K02183+K02183+K05210+K04515+K04348+K02677+K00274+K04345+K04345+K04440+K06269+K04382+K04374+K02183+K02183+K02183+K02183+K02183+K01593+K02183+K02183+K02183+K02183+K02183+K02183+K02183+K02183+K11583+K04439+K04439+K04439+K04439+K04144+K04354+K00274+K02183+K11583+K05858+K02183+K02183+K02183+…
Cellular Processes	Transport and catabolism	Phagosome	111	ko04145	Cg00256;Cg00257;Cg00258;Cg00259;Cg01541;Cg01542;Cg01745;Cg02028;Cg02064;Cg02067;Cg02068;Cg02075;Cg02118;Cg04261;Cg04278;Cg05167;Cg05231;Cg05321;Cg05561;Cg06109;Cg06472;Cg06855;Cg07998;Cg08283;Cg08652;Cg08933;Cg08935;Cg08940;Cg08944;Cg09233;Cg09922;Cg10565;Cg11323;Cg12814;Cg12839;Cg13172;Cg13213;Cg13407;Cg13445;Cg13457;Cg13681;Cg13884;Cg14077;Cg14358;Cg14631;Cg14677;Cg15609;Cg16466;Cg16744;Cg17919…	K01365+K01365+K01365+K01365+K06563+K06563+K06563+K06563+K06563+K06563+K06563+K06563+K06563+K13240+K10089+K06560+K06563+K02146+K06493+K10416+K13885+K08009+K02150+K06563+K06563+K10159+K10160+K10159+K10159+K21421+K01365+K08057+K07374+K10956+K03662+K06560+K07888+K07889+K07374+K07375+K05692+K02155+K08054+K01365+K08517+K09481+K02152+K02145+K08488+K07374+K07374+K07374+K07374+K04392+K03661+K08057+K07375+…
Human Diseases	Infectious diseases	Herpes simplex infection	110	ko05168	Cg04518;Cg04547;Cg04643;Cg05079;Cg05531;Cg05561;Cg05663;Cg05778;Cg06935;Cg07130;Cg07344;Cg07346;Cg07352;Cg07358;Cg07363;Cg07365;Cg07368;Cg07641;Cg07898;Cg07899;Cg07900;Cg07910;Cg07911;Cg08212;Cg08933;Cg08940;Cg08944;Cg09085;Cg09336;Cg09517;Cg09739;Cg10565;Cg10720;Cg10724;Cg10730;Cg10736;Cg10739;Cg12265;Cg12266;Cg12848;Cg12849;Cg13241;Cg15522;Cg16257;Cg16598;Cg16689;Cg16690;Cg16781;Cg16846;Cg16935…	K12890+K12890+K16194+K03239+K06269+K06493+K00922+K02649+K07203+K00922+K16060+K16060+K16060+K16060+K16060+K16060+K16060+K16060+K16060+K16060+K16060+K16060+K16060+K16060+K10159+K10159+K10159+K16060+K16060+K14021+K04427+K08057+K05410+K05410+K05410+K05410+K05410+K05410+K05410+K05410+K05410+K03173+K03173+K07206+K03240+K02649+K02649+K03241+K03237+K12893+K07205+K12881+K03754+K04467+K04467+K07207+K08057+…
Metabolism	Nucleotide metabolism	Purine metabolism	109	ko00230	Cg00581;Cg01179;Cg02711;Cg03595;Cg03775;Cg04031;Cg04168;Cg04332;Cg04628;Cg04803;Cg04901;Cg04920;Cg05029;Cg05210;Cg05631;Cg05942;Cg06581;Cg06774;Cg07023;Cg07882;Cg07936;Cg09169;Cg09171;Cg09694;Cg09868;Cg10176;Cg10403;Cg11921;Cg11922;Cg13118;Cg13748;Cg13753;Cg13788;Cg13808;Cg13809;Cg13936;Cg14227;Cg14650;Cg14831;Cg14877;Cg15094;Cg15124;Cg15524;Cg15651;Cg15783;Cg16128;Cg16129;Cg16540;Cg16726;Cg16731…	K12305+K21138+K00873+K13988+K11787+K12319+K12324+K00364+K08042+K01466+K01951+K16855+K22600+K00759+K13761+K01081+K13758+K12322+K01518+K19970+K19970+K19970+K19970+K19021+K18533+K13987+K00088+K00106+K00106+K13755+K08049+K00948+K00940+K12318+K12319+K15779+K18283+K00942+K01952+K01490+K07127+K18438+K00365+K00939+K13761+K00764+K01587+K00939+K13293+K13293+K18438+K18438+K18436+K10808+K10808+K01769+K01517+…
Metabolism	Carbohydrate metabolism	Amino sugar and nucleotide sugar metabolism	109	ko00520	Cg00659;Cg00661;Cg00802;Cg00958;Cg01202;Cg01355;Cg01356;Cg01910;Cg02120;Cg02143;Cg02456;Cg02457;Cg02910;Cg03004;Cg03006;Cg03007;Cg03008;Cg03175;Cg05445;Cg05554;Cg06524;Cg06525;Cg06526;Cg06950;Cg07002;Cg07579;Cg07642;Cg07644;Cg08151;Cg08964;Cg10398;Cg10779;Cg10865;Cg11122;Cg11442;Cg13138;Cg13897;Cg13936;Cg13986;Cg13991;Cg13992;Cg13994;Cg14471;Cg14472;Cg14473;Cg14817;Cg15028;Cg15326;Cg15625;Cg15794…	K12373+K12373+K12373+K12373+K12373+K00698+K00698+K00698+K00698+K12373+K12373+K12373+K12373+K00698+K00698+K00698+K00698+K12373+K05305+K12373+K01810+K01810+K01810+K12373+K01711+K01639+K01639+K01639+K02377+K00326+K00966+K00698+K00698+K01787+K12373+K12373+K00976+K15779+K00698+K00698+K00698+K00698+K00698+K00698+K00698+K00966+K01443+K01183+K01183+K01639+K00012+K01784+K17497+K00820+K01639+K01639+K00849+…
Metabolism	Global and overview maps	Carbon metabolism	109	ko01200	Cg00288;Cg00319;Cg01192;Cg01193;Cg01194;Cg02711;Cg02900;Cg03164;Cg03777;Cg03833;Cg04175;Cg04669;Cg04728;Cg04748;Cg05007;Cg05129;Cg05394;Cg05406;Cg05500;Cg05774;Cg06098;Cg06457;Cg06524;Cg06525;Cg06526;Cg06763;Cg06764;Cg08189;Cg08689;Cg08698;Cg08701;Cg08702;Cg09158;Cg09411;Cg09581;Cg09808;Cg09831;Cg10025;Cg10026;Cg10516;Cg11072;Cg11875;Cg11903;Cg11911;Cg11912;Cg12107;Cg12192;Cg12201;Cg12286;Cg12796…	K00831+K00831+K00615+K00615+K00615+K00873+K01681+K01681+K00232+K00235+K00248+K01689+K00026+K01623+K00814+K00297+K01676+K00033+K01676+K01803+K02437+K00830+K01810+K01810+K01810+K17989+K17989+K00161+K00029+K00626+K00626+K00626+K19269+K00029+K00616+K19269+K00626+K03781+K03781+K00030+K00382+K00615+K00162+K11529+K11529+K01900+K00605+K00814+K00232+K01079+K00036+K00236+K00948+K01057+K00927+K01807+K00030+…
Cellular Processes	Cell growth and death	Oocyte meiosis	109	ko04114	Cg00289;Cg00320;Cg01265;Cg01266;Cg03498;Cg03621;Cg04628;Cg05531;Cg06174;Cg06183;Cg06851;Cg09481;Cg09756;Cg13053;Cg13065;Cg13748;Cg13966;Cg14337;Cg14393;Cg14822;Cg15188;Cg15715;Cg17621;Cg17622;Cg17964;Cg17970;Cg18444;Cg18445;Cg19436;Cg19497;Cg19756;Cg20272;Cg20319;Cg20596;Cg20920;Cg20986;Cg21123;Cg21124;Cg21518;Cg21950;Cg22232;Cg22298;Cg22449;Cg22867;Cg22872;Cg22873;Cg22874;Cg22875;Cg23255;Cg23387…	K02183+K02183+K02183+K02183+K04371+K03352+K08042+K06269+K05868+K02183+K02183+K04373+K04526+K03456+K03456+K08049+K02183+K03357+K03350+K02183+K03349+K03868+K02183+K02183+K04515+K04348+K04345+K04345+K03363+K06269+K04382+K03347+K03094+K02183+K02206+K02183+K02183+K02183+K02183+K02183+K02183+K06631+K02183+K02183+K02183+K02183+K02183+K02183+K03353+K03351+K03363+K03362+K02183+K04368+K21770+K02183+K02183+…
Environmental Information Processing	Signal transduction	cGMP - PKG signaling pathway	108	ko04022	Cg00289;Cg00320;Cg01265;Cg01266;Cg03498;Cg03501;Cg04031;Cg04168;Cg04628;Cg05531;Cg06183;Cg06190;Cg06851;Cg06987;Cg06988;Cg06990;Cg09694;Cg09756;Cg10177;Cg13748;Cg13808;Cg13809;Cg13966;Cg14227;Cg14822;Cg17621;Cg17622;Cg17970;Cg19497;Cg19543;Cg19904;Cg20128;Cg20129;Cg20596;Cg20986;Cg21123;Cg21124;Cg21518;Cg21950;Cg22232;Cg22449;Cg22867;Cg22872;Cg22873;Cg22874;Cg22875;Cg24610;Cg25043;Cg25206;Cg25908…	K02183+K02183+K02183+K02183+K04371+K04136+K12319+K12324+K08042+K06269+K02183+K04135+K02183+K04513+K04513+K04513+K19021+K04526+K04136+K08049+K12318+K12319+K02183+K18283+K02183+K02183+K02183+K04348+K06269+K04141+K04374+K16172+K16172+K02183+K02183+K02183+K02183+K02183+K02183+K02183+K02183+K02183+K02183+K02183+K02183+K02183+K02183+K12319+K04135+K04368+K18050+K05858+K02183+K02183+K02183+K02183+K02183+…
Human Diseases	Infectious diseases	Salmonella infection	108	ko05132	Cg00428;Cg00569;Cg00571;Cg00572;Cg01777;Cg03498;Cg04208;Cg04278;Cg04661;Cg05025;Cg06109;Cg06987;Cg06988;Cg06990;Cg07344;Cg07346;Cg07352;Cg07358;Cg07363;Cg07365;Cg07368;Cg07641;Cg07853;Cg07898;Cg07899;Cg07900;Cg07910;Cg07911;Cg07956;Cg08212;Cg08933;Cg08935;Cg08940;Cg08944;Cg09085;Cg09336;Cg09517;Cg09739;Cg10418;Cg11137;Cg13213;Cg13241;Cg13407;Cg13615;Cg13681;Cg13703;Cg13931;Cg13932;Cg15280;Cg15522…	K23612+K23612+K23612+K23612+K23612+K04371+K05756+K10089+K07937+K04393+K10416+K04513+K04513+K04513+K16060+K16060+K16060+K16060+K16060+K16060+K16060+K16060+K07937+K16060+K16060+K16060+K16060+K16060+K23612+K16060+K10159+K10160+K10159+K10159+K16060+K16060+K14021+K04427+K23612+K05755+K07888+K03173+K07889+K02985+K05692+K04431+K05749+K05749+K05754+K03173+K02105+K07937+K07937+K07937+K07937+K07937+K04467+…
Organismal Systems	Endocrine system	Insulin secretion	107	ko04911	Cg01221;Cg01335;Cg01389;Cg01887;Cg02163;Cg02164;Cg02220;Cg02221;Cg02222;Cg02534;Cg02535;Cg02614;Cg02615;Cg02870;Cg02882;Cg02883;Cg03053;Cg03061;Cg03062;Cg04628;Cg05118;Cg05143;Cg05166;Cg05812;Cg05813;Cg05910;Cg06684;Cg06861;Cg06865;Cg07091;Cg07509;Cg07813;Cg08671;Cg08685;Cg08696;Cg09008;Cg09756;Cg10187;Cg10188;Cg10194;Cg10435;Cg10636;Cg10637;Cg10933;Cg12559;Cg12560;Cg12563;Cg13234;Cg13748;Cg13766…	K04194+K04194+K04194+K04194+K04194+K04194+K04194+K04194+K04194+K04194+K04194+K04194+K04194+K04194+K04194+K04194+K04194+K04194+K04194+K08042+K04194+K04194+K04194+K04194+K04194+K04560+K04194+K04194+K04194+K04194+K04194+K04194+K04194+K04194+K04194+K04194+K04526+K04194+K04194+K04194+K04194+K04194+K04194+K04194+K04194+K04194+K04194+K04194+K08049+K04194+K04194+K04194+K04194+K04194+K04194+K04194+K04194+…
Environmental Information Processing	Signal transduction	Apelin signaling pathway	105	ko04371	Cg00289;Cg00320;Cg01265;Cg01266;Cg01320;Cg02695;Cg03498;Cg04261;Cg04628;Cg04873;Cg05768;Cg06183;Cg06469;Cg06851;Cg06935;Cg07103;Cg08553;Cg13270;Cg13708;Cg13748;Cg13966;Cg14822;Cg17248;Cg17249;Cg17443;Cg17444;Cg17621;Cg17622;Cg18444;Cg18445;Cg19716;Cg19962;Cg20596;Cg20986;Cg21123;Cg21124;Cg21518;Cg21950;Cg22232;Cg22449;Cg22592;Cg22688;Cg22867;Cg22872;Cg22873;Cg22874;Cg22875;Cg24610;Cg24627;Cg25908…	K02183+K02183+K02183+K02183+K23605+K04501+K04371+K13240+K08042+K08341+K04688+K02183+K08341+K02183+K07203+K08333+K07830+K04674+K08334+K08049+K02183+K02183+K04718+K04718+K04718+K04718+K02183+K02183+K04345+K04345+K07198+K07198+K02183+K02183+K02183+K02183+K02183+K02183+K02183+K02183+K07827+K07827+K02183+K02183+K02183+K02183+K02183+K02183+K09203+K04368+K18050+K05858+K07199+K02183+K02183+K02183+K02183+…
Human Diseases	Cancers	Glioma	104	ko05214	Cg00289;Cg00320;Cg01265;Cg01266;Cg03498;Cg05663;Cg05723;Cg05724;Cg05725;Cg05775;Cg05778;Cg06183;Cg06851;Cg06935;Cg07130;Cg08923;Cg09517;Cg11493;Cg13966;Cg14822;Cg15826;Cg16689;Cg16690;Cg16971;Cg16973;Cg17616;Cg17621;Cg17622;Cg17964;Cg18224;Cg19034;Cg19391;Cg19393;Cg19397;Cg20596;Cg20608;Cg20986;Cg21123;Cg21124;Cg21518;Cg21950;Cg22232;Cg22449;Cg22592;Cg22688;Cg22867;Cg22872;Cg22873;Cg22874;Cg22875…	K02183+K02183+K02183+K02183+K04371+K00922+K01116+K01116+K01116+K10140+K02649+K02183+K02183+K07203+K00922+K06643+K14021+K04365+K02183+K02183+K04361+K02649+K02649+K04402+K04402+K04364+K02183+K02183+K04515+K02677+K01110+K04402+K04402+K04402+K02183+K02159+K02183+K02183+K02183+K02183+K02183+K02183+K02183+K07827+K07827+K02183+K02183+K02183+K02183+K02183+K02183+K04368+K03511+K02183+K02183+K02183+K02183+…
Organismal Systems	Endocrine system	GnRH signaling pathway	103	ko04912	Cg00289;Cg00320;Cg01265;Cg01266;Cg03498;Cg04628;Cg05025;Cg06183;Cg06851;Cg09475;Cg13703;Cg13748;Cg13966;Cg14822;Cg15519;Cg15826;Cg17616;Cg17621;Cg17622;Cg17964;Cg18224;Cg18426;Cg18444;Cg18445;Cg18484;Cg18698;Cg19085;Cg19904;Cg20596;Cg20986;Cg21123;Cg21124;Cg21518;Cg21950;Cg22232;Cg22449;Cg22592;Cg22688;Cg22867;Cg22872;Cg22873;Cg22874;Cg22875;Cg23851;Cg23852;Cg24610;Cg24627;Cg25834;Cg25908;Cg26222…	K02183+K02183+K02183+K02183+K04371+K08042+K04393+K02183+K02183+K01115+K04431+K08049+K02183+K02183+K16342+K04361+K04364+K02183+K02183+K04515+K02677+K04416+K04345+K04345+K04440+K04448+K05704+K04374+K02183+K02183+K02183+K02183+K02183+K02183+K02183+K02183+K07827+K07827+K02183+K02183+K02183+K02183+K02183+K16342+K16342+K02183+K09203+K04393+K04368+K04280+K04280+K05858+K02183+K02183+K02183+K02183+K02183+…
Organismal Systems	Endocrine system	Estrogen signaling pathway	103	ko04915	Cg00289;Cg00320;Cg01265;Cg01266;Cg03498;Cg04628;Cg05663;Cg05778;Cg06183;Cg06851;Cg07130;Cg13748;Cg13966;Cg14822;Cg15826;Cg16689;Cg16690;Cg17505;Cg17506;Cg17507;Cg17616;Cg17621;Cg17622;Cg17918;Cg18444;Cg18445;Cg18698;Cg19085;Cg19904;Cg20195;Cg20596;Cg20986;Cg21123;Cg21124;Cg21134;Cg21518;Cg21900;Cg21950;Cg22232;Cg22449;Cg22592;Cg22688;Cg22867;Cg22872;Cg22873;Cg22874;Cg22875;Cg24610;Cg25908;Cg26677…	K02183+K02183+K02183+K02183+K04371+K08042+K00922+K02649+K02183+K02183+K00922+K08049+K02183+K02183+K04361+K02649+K02649+K03283+K03283+K03283+K04364+K02183+K02183+K03283+K04345+K04345+K04448+K05704+K04374+K03283+K02183+K02183+K02183+K02183+K01379+K02183+K04615+K02183+K02183+K02183+K07827+K07827+K02183+K02183+K02183+K02183+K02183+K02183+K04368+K04079+K05858+K02183+K02183+K02183+K02183+K02183+K02183+…
Organismal Systems	Circulatory system	Adrenergic signaling in cardiomyocytes	102	ko04261	Cg00289;Cg00320;Cg01265;Cg01266;Cg03498;Cg03501;Cg04628;Cg05531;Cg06183;Cg06190;Cg06851;Cg10177;Cg13053;Cg13065;Cg13748;Cg13966;Cg14822;Cg17621;Cg17622;Cg17964;Cg18224;Cg18444;Cg18445;Cg19497;Cg19543;Cg19756;Cg19904;Cg20596;Cg20986;Cg21123;Cg21124;Cg21518;Cg21950;Cg22232;Cg22449;Cg22867;Cg22872;Cg22873;Cg22874;Cg22875;Cg23369;Cg23987;Cg24610;Cg25206;Cg26686;Cg26811;Cg27066;Cg27067;Cg27068;Cg27069…	K02183+K02183+K02183+K02183+K04371+K04136+K08042+K06269+K02183+K04135+K02183+K04136+K03456+K03456+K08049+K02183+K02183+K02183+K02183+K04515+K02677+K04345+K04345+K06269+K04141+K04382+K04374+K02183+K02183+K02183+K02183+K02183+K02183+K02183+K02183+K02183+K02183+K02183+K02183+K02183+K11583+K04354+K02183+K04135+K11583+K05858+K02183+K02183+K02183+K02183+K02183+K02183+K02183+K02183+K02183+K02183+K02183+…
Human Diseases	Cancers	Hepatocellular carcinoma	102	ko05225	Cg01198;Cg01320;Cg02695;Cg03498;Cg03652;Cg03653;Cg04454;Cg04750;Cg04751;Cg05072;Cg05187;Cg05663;Cg05706;Cg05723;Cg05724;Cg05725;Cg05768;Cg05775;Cg05778;Cg06935;Cg07014;Cg07033;Cg07130;Cg08543;Cg08544;Cg09245;Cg09302;Cg09472;Cg09473;Cg09517;Cg09566;Cg09568;Cg10320;Cg11224;Cg11493;Cg11693;Cg11831;Cg12066;Cg12204;Cg12205;Cg12206;Cg12985;Cg13270;Cg13409;Cg13416;Cg13417;Cg13536;Cg13681;Cg14664;Cg14667…	K02085+K23605+K04501+K04371+K00799+K00799+K08957+K00799+K00799+K00408+K00799+K00922+K00799+K01116+K01116+K01116+K04688+K10140+K02649+K07203+K22182+K02353+K00922+K00799+K00799+K02354+K02842+K00799+K00799+K14021+K23790+K23790+K22182+K00799+K04365+K01558+K00572+K00182+K00799+K00799+K00799+K00444+K04674+K02432+K02432+K02432+K00799+K05692+K02375+K02375+K00799+K04361+K01064+K03209+K00445+K01357+K02105+…
Organismal Systems	Endocrine system	Glucagon signaling pathway	101	ko04922	Cg00289;Cg00320;Cg01265;Cg01266;Cg02438;Cg02711;Cg03744;Cg03745;Cg04628;Cg06183;Cg06851;Cg08189;Cg08640;Cg08641;Cg11903;Cg13740;Cg13746;Cg13966;Cg14822;Cg17621;Cg17622;Cg17964;Cg17970;Cg18444;Cg18445;Cg18504;Cg19716;Cg19904;Cg19962;Cg20068;Cg20113;Cg20596;Cg20986;Cg21123;Cg21124;Cg21518;Cg21950;Cg22232;Cg22449;Cg22867;Cg22872;Cg22873;Cg22874;Cg22875;Cg22963;Cg24610;Cg25470;Cg26811;Cg26844;Cg27066…	K02183+K02183+K02183+K02183+K08765+K00873+K01596+K01596+K08042+K02183+K02183+K00161+K00688+K08765+K00162+K04498+K04498+K02183+K02183+K02183+K02183+K04515+K04348+K04345+K04345+K11411+K07198+K04374+K07198+K00850+K00693+K02183+K02183+K02183+K02183+K02183+K02183+K02183+K02183+K02183+K02183+K02183+K02183+K02183+K11434+K02183+K01834+K05858+K07199+K02183+K02183+K02183+K02183+K02183+K02183+K02183+K02183+…
Human Diseases	Infectious diseases	Toxoplasmosis	100	ko05145	Cg03498;Cg07344;Cg07346;Cg07352;Cg07358;Cg07363;Cg07365;Cg07368;Cg07641;Cg07804;Cg07837;Cg07898;Cg07899;Cg07900;Cg07910;Cg07911;Cg08212;Cg08933;Cg08935;Cg08940;Cg08944;Cg09085;Cg09285;Cg09336;Cg09542;Cg09739;Cg10660;Cg10662;Cg10664;Cg10665;Cg10666;Cg10669;Cg10672;Cg10673;Cg10676;Cg10679;Cg14072;Cg14784;Cg16833;Cg17505;Cg17506;Cg17507;Cg17918;Cg18231;Cg18232;Cg18484;Cg19321;Cg19540;Cg19588;Cg19600…	K04371+K16060+K16060+K16060+K16060+K16060+K16060+K16060+K16060+K16061+K16061+K16060+K16060+K16060+K16060+K16060+K16060+K10159+K10160+K10159+K10159+K16060+K16061+K16060+K16061+K04427+K05636+K05636+K05636+K05636+K05636+K05636+K05636+K05636+K05636+K05636+K00461+K05635+K06240+K03283+K03283+K03283+K03283+K04467+K04467+K04440+K05637+K03175+K06276+K02580+K03283+K04447+K04447+K04447+K04447+K04447+K03175+…
Human Diseases	Substance dependence	Alcoholism	99	ko05034	Cg00289;Cg00320;Cg01265;Cg01266;Cg03498;Cg05531;Cg06183;Cg06851;Cg07361;Cg08312;Cg11493;Cg12541;Cg13115;Cg13389;Cg13966;Cg14520;Cg14822;Cg16806;Cg17616;Cg17621;Cg17622;Cg17749;Cg18151;Cg18249;Cg18444;Cg18445;Cg19497;Cg19904;Cg20596;Cg20986;Cg21123;Cg21124;Cg21518;Cg21894;Cg21950;Cg22232;Cg22449;Cg22592;Cg22688;Cg22867;Cg22872;Cg22873;Cg22874;Cg22875;Cg23604;Cg24607;Cg24610;Cg25908;Cg27066;Cg27067…	K02183+K02183+K02183+K02183+K04371+K06269+K02183+K02183+K00501+K04266+K04365+K04145+K04145+K04145+K02183+K01593+K02183+K05213+K04364+K02183+K02183+K05210+K06067+K00274+K04345+K04345+K06269+K04374+K02183+K02183+K02183+K02183+K02183+K01593+K02183+K02183+K02183+K07827+K07827+K02183+K02183+K02183+K02183+K02183+K04144+K00274+K02183+K04368+K02183+K02183+K02183+K02183+K02183+K02183+K02183+K02183+K02183+…
Human Diseases	Substance dependence	Amphetamine addiction	96	ko05031	Cg00289;Cg00320;Cg01265;Cg01266;Cg05531;Cg05910;Cg06183;Cg06851;Cg07361;Cg13966;Cg14520;Cg14822;Cg16806;Cg17621;Cg17622;Cg17749;Cg17964;Cg17970;Cg18151;Cg18224;Cg18249;Cg18444;Cg18445;Cg18504;Cg18698;Cg19497;Cg19904;Cg20596;Cg20986;Cg21123;Cg21124;Cg21518;Cg21894;Cg21950;Cg22232;Cg22449;Cg22867;Cg22872;Cg22873;Cg22874;Cg22875;Cg23604;Cg24607;Cg24610;Cg27066;Cg27067;Cg27068;Cg27069;Cg27070;Cg27071…	K02183+K02183+K02183+K02183+K06269+K04560+K02183+K02183+K00501+K02183+K01593+K02183+K05213+K02183+K02183+K05210+K04515+K04348+K06067+K02677+K00274+K04345+K04345+K11411+K04448+K06269+K04374+K02183+K02183+K02183+K02183+K02183+K01593+K02183+K02183+K02183+K02183+K02183+K02183+K02183+K02183+K04144+K00274+K02183+K02183+K02183+K02183+K02183+K02183+K02183+K02183+K02183+K02183+K02183+K02183+K02183+K02183+…
Cellular Processes	Cell growth and death	Apoptosis	94	ko04210	Cg00256;Cg00257;Cg00258;Cg00259;Cg03498;Cg05078;Cg05663;Cg05778;Cg06692;Cg06886;Cg07130;Cg07344;Cg07346;Cg07352;Cg07358;Cg07363;Cg07365;Cg07368;Cg07641;Cg07734;Cg07735;Cg07898;Cg07899;Cg07900;Cg07910;Cg07911;Cg08212;Cg09085;Cg09336;Cg09517;Cg09922;Cg11062;Cg11323;Cg13241;Cg13445;Cg13614;Cg13681;Cg14358;Cg15522;Cg16689;Cg16690;Cg16846;Cg16971;Cg16973;Cg17919;Cg17920;Cg18064;Cg18065;Cg18231;Cg18232…	K01365+K01365+K01365+K01365+K04371+K10798+K00922+K02649+K10798+K01373+K00922+K16060+K16060+K16060+K16060+K16060+K16060+K16060+K16060+K10798+K10798+K16060+K16060+K16060+K16060+K16060+K16060+K16060+K16060+K14021+K01365+K01275+K07374+K03173+K07374+K01374+K05692+K01365+K03173+K02649+K02649+K03237+K04402+K04402+K07374+K07374+K07374+K07374+K04467+K04467+K08852+K04440+K04448+K04402+K04402+K04402+K06276+…
Organismal Systems	Environmental adaptation	Thermogenesis	94	ko04714	Cg02438;Cg03833;Cg03887;Cg03928;Cg03968;Cg03969;Cg04042;Cg04628;Cg05514;Cg05768;Cg06131;Cg06240;Cg06523;Cg06847;Cg06935;Cg08641;Cg09291;Cg09481;Cg09766;Cg10111;Cg10493;Cg10550;Cg10582;Cg10584;Cg12039;Cg12068;Cg13423;Cg13681;Cg13748;Cg14029;Cg14919;Cg15817;Cg16204;Cg16257;Cg16864;Cg16902;Cg16958;Cg17011;Cg17043;Cg17260;Cg17391;Cg17454;Cg17616;Cg17721;Cg17722;Cg17973;Cg18108;Cg18251;Cg18444;Cg18445…	K08765+K00235+K02266+K02266+K00411+K00411+K03943+K08042+K03961+K04688+K02263+K03941+K00413+K03936+K07203+K08765+K03964+K04373+K02137+K02127+K02136+K08766+K01054+K01054+K11351+K11352+K00236+K05692+K08049+K03935+K03949+K03959+K02140+K07206+K11416+K02134+K00415+K07204+K08266+K02258+K02130+K02258+K04364+K11416+K11416+K01897+K03950+K03955+K04345+K04345+K02265+K07207+K00416+K03951+K03939+K01897+K02257+…
Organismal Systems	Nervous system	Long-term potentiation	94	ko04720	Cg00289;Cg00320;Cg01265;Cg01266;Cg03498;Cg05531;Cg06183;Cg06851;Cg09481;Cg11493;Cg13740;Cg13746;Cg13966;Cg14822;Cg17621;Cg17622;Cg17749;Cg17964;Cg17970;Cg18224;Cg18444;Cg18445;Cg19497;Cg19904;Cg20596;Cg20986;Cg21123;Cg21124;Cg21518;Cg21950;Cg22232;Cg22449;Cg22592;Cg22688;Cg22867;Cg22872;Cg22873;Cg22874;Cg22875;Cg24610;Cg25908;Cg26811;Cg27066;Cg27067;Cg27068;Cg27069;Cg27070;Cg27071;Cg27072;Cg27073…	K02183+K02183+K02183+K02183+K04371+K06269+K02183+K02183+K04373+K04365+K04498+K04498+K02183+K02183+K02183+K02183+K05210+K04515+K04348+K02677+K04345+K04345+K06269+K04374+K02183+K02183+K02183+K02183+K02183+K02183+K02183+K02183+K07827+K07827+K02183+K02183+K02183+K02183+K02183+K02183+K04368+K05858+K02183+K02183+K02183+K02183+K02183+K02183+K02183+K02183+K02183+K02183+K02183+K02183+K02183+K02183+K02183+…
Human Diseases	Infectious diseases	Epstein-Barr virus infection	94	ko05169	Cg01216;Cg04606;Cg04607;Cg05386;Cg05507;Cg05663;Cg05775;Cg05778;Cg06148;Cg06797;Cg06830;Cg06863;Cg07130;Cg08478;Cg08923;Cg08933;Cg08940;Cg08944;Cg09517;Cg09611;Cg09739;Cg10565;Cg10720;Cg10724;Cg10730;Cg10736;Cg10739;Cg12265;Cg12266;Cg12848;Cg12849;Cg13241;Cg13703;Cg15522;Cg16679;Cg16689;Cg16690;Cg16971;Cg16973;Cg17614;Cg17782;Cg17791;Cg18151;Cg18231;Cg18232;Cg18252;Cg18484;Cg18698;Cg18793;Cg19366…	K03030+K06054+K06054+K03061+K03061+K00922+K10140+K02649+K03038+K06054+K06054+K06054+K00922+K03039+K06643+K10159+K10159+K10159+K14021+K10151+K04427+K08057+K05410+K05410+K05410+K05410+K05410+K05410+K05410+K05410+K05410+K03173+K04431+K03173+K03875+K02649+K02649+K04402+K04402+K03030+K03035+K03065+K06067+K04467+K04467+K04392+K04440+K04448+K08057+K04377+K04402+K04402+K04402+K03175+K02580+K10881+K02159+…
Cellular Processes	Transport and catabolism	Peroxisome	92	ko04146	Cg02288;Cg03777;Cg03818;Cg03824;Cg04082;Cg04210;Cg04461;Cg04462;Cg04816;Cg05010;Cg05239;Cg05655;Cg05798;Cg06006;Cg06326;Cg06448;Cg06457;Cg06567;Cg06568;Cg06622;Cg06693;Cg06694;Cg06696;Cg08305;Cg08929;Cg09263;Cg09433;Cg09584;Cg10025;Cg10026;Cg11171;Cg11547;Cg11921;Cg11922;Cg12286;Cg12641;Cg12642;Cg12674;Cg12845;Cg14199;Cg15227;Cg16721;Cg16850;Cg17513;Cg17571;Cg17973;Cg18147;Cg18477;Cg18693;Cg18748…	K13353+K00232+K13355+K13355+K13345+K13342+K00272+K00272+K11992+K17879+K13347+K00869+K17879+K13299+K13348+K13343+K00830+K13349+K13349+K13239+K00272+K00272+K00272+K04565+K13341+K04564+K03426+K01578+K03781+K03781+K05676+K00477+K00106+K00106+K00232+K00306+K00306+K00273+K13340+K00624+K13337+K00273+K08764+K13354+K13346+K01897+K08764+K13336+K13348+K13237+K13344+K13348+K01897+K05677+K05677+K12261+K13348+…
Human Diseases	Cancers	Small cell lung cancer	92	ko05222	Cg05663;Cg05775;Cg05778;Cg07130;Cg07344;Cg07346;Cg07352;Cg07358;Cg07363;Cg07365;Cg07368;Cg07641;Cg07804;Cg07837;Cg07898;Cg07899;Cg07900;Cg07910;Cg07911;Cg08212;Cg09085;Cg09285;Cg09336;Cg09517;Cg09542;Cg10660;Cg10662;Cg10664;Cg10665;Cg10666;Cg10669;Cg10672;Cg10673;Cg10676;Cg10679;Cg11510;Cg13241;Cg14784;Cg15512;Cg15517;Cg15518;Cg15522;Cg16679;Cg16689;Cg16690;Cg16833;Cg16971;Cg16973;Cg18231;Cg18232…	K00922+K10140+K02649+K00922+K16060+K16060+K16060+K16060+K16060+K16060+K16060+K16060+K16061+K16061+K16060+K16060+K16060+K16060+K16060+K16060+K16060+K16061+K16060+K14021+K16061+K05636+K05636+K05636+K05636+K05636+K05636+K05636+K05636+K05636+K05636+K05717+K03173+K05635+K11987+K11987+K11987+K03173+K03875+K02649+K02649+K06240+K04402+K04402+K04467+K04467+K01110+K05637+K04377+K04402+K04402+K04402+K03175+…
Metabolism	Glycan biosynthesis and metabolism	Various types of N-glycan biosynthesis	90	ko00513	Cg00049;Cg00195;Cg00659;Cg00661;Cg00802;Cg00958;Cg01202;Cg02143;Cg02456;Cg02457;Cg02910;Cg03175;Cg03776;Cg04275;Cg04523;Cg05379;Cg05517;Cg05554;Cg06950;Cg07577;Cg07640;Cg08165;Cg09470;Cg09471;Cg09807;Cg10200;Cg10308;Cg10561;Cg10570;Cg11156;Cg11328;Cg11329;Cg11330;Cg11347;Cg11442;Cg11528;Cg11529;Cg13138;Cg13381;Cg13391;Cg13871;Cg14526;Cg14603;Cg14616;Cg14832;Cg14943;Cg15252;Cg15965;Cg16022;Cg17268…	K01231+K00726+K12373+K12373+K12373+K12373+K12373+K12373+K12373+K12373+K12373+K12373+K03845+K14464+K05533+K12670+K12670+K12373+K12373+K01230+K01230+K05529+K00753+K00753+K07966+K07432+K03847+K09672+K09672+K12666+K03714+K03714+K03714+K14464+K12373+K00753+K00753+K12373+K14464+K14464+K13748+K23741+K00738+K00738+K12669+K03714+K03844+K09673+K09673+K00753+K14459+K00753+K03843+K07441+K03842+K01231+K07151+…
Organismal Systems	Digestive system	Salivary secretion	89	ko04970	Cg00289;Cg00320;Cg01265;Cg01266;Cg03501;Cg04031;Cg04261;Cg04628;Cg06183;Cg06190;Cg06851;Cg10177;Cg13748;Cg13808;Cg13809;Cg13966;Cg14822;Cg17621;Cg17622;Cg18224;Cg18444;Cg18445;Cg19543;Cg20596;Cg20694;Cg20986;Cg21123;Cg21124;Cg21518;Cg21950;Cg22232;Cg22449;Cg22867;Cg22872;Cg22873;Cg22874;Cg22875;Cg23050;Cg23051;Cg24610;Cg25043;Cg25206;Cg26608;Cg26811;Cg27066;Cg27067;Cg27068;Cg27069;Cg27070;Cg27071…	K02183+K02183+K02183+K02183+K04136+K12319+K13240+K08042+K02183+K04135+K02183+K04136+K08049+K12318+K12319+K02183+K02183+K02183+K02183+K02677+K04345+K04345+K04141+K02183+K04131+K02183+K02183+K02183+K02183+K02183+K02183+K02183+K02183+K02183+K02183+K02183+K02183+K18152+K18152+K02183+K12319+K04135+K04131+K05858+K02183+K02183+K02183+K02183+K02183+K02183+K02183+K02183+K02183+K02183+K02183+K02183+K02183+…
Organismal Systems	Environmental adaptation	Circadian entrainment	87	ko04713	Cg00289;Cg00320;Cg01265;Cg01266;Cg03498;Cg04031;Cg04261;Cg04628;Cg06183;Cg06851;Cg08987;Cg13748;Cg13808;Cg13809;Cg13966;Cg14822;Cg17104;Cg17106;Cg17621;Cg17622;Cg17749;Cg17964;Cg18224;Cg18444;Cg18445;Cg20596;Cg20986;Cg21123;Cg21124;Cg21518;Cg21950;Cg22232;Cg22449;Cg22867;Cg22872;Cg22873;Cg22874;Cg22875;Cg24610;Cg25043;Cg26811;Cg26862;Cg27066;Cg27067;Cg27068;Cg27069;Cg27070;Cg27071;Cg27072;Cg27073…	K02183+K02183+K02183+K02183+K04371+K12319+K13240+K08042+K02183+K02183+K04286+K08049+K12318+K12319+K02183+K02183+K04285+K04285+K02183+K02183+K05210+K04515+K02677+K04345+K04345+K02183+K02183+K02183+K02183+K02183+K02183+K02183+K02183+K02183+K02183+K02183+K02183+K02183+K02183+K12319+K05858+K04285+K02183+K02183+K02183+K02183+K02183+K02183+K02183+K02183+K02183+K02183+K02183+K02183+K02183+K02183+K02183+…
Human Diseases	Infectious diseases	Pathogenic Escherichia coli infection	87	ko05130	Cg00428;Cg00569;Cg00571;Cg00572;Cg01777;Cg03498;Cg04208;Cg04661;Cg05025;Cg06987;Cg06988;Cg06990;Cg07853;Cg07956;Cg08935;Cg09517;Cg09739;Cg10418;Cg11137;Cg11323;Cg12326;Cg13241;Cg13445;Cg13457;Cg13615;Cg13681;Cg13931;Cg13932;Cg15280;Cg15522;Cg17491;Cg17492;Cg17493;Cg17494;Cg17495;Cg17919;Cg17920;Cg18064;Cg18065;Cg18231;Cg18232;Cg18238;Cg18252;Cg18258;Cg18484;Cg18660;Cg18698;Cg19411;Cg19451;Cg19540…	K23612+K23612+K23612+K23612+K23612+K04371+K05756+K07937+K04393+K04513+K04513+K04513+K07937+K23612+K10160+K14021+K04427+K23612+K05755+K07374+K01313+K03173+K07374+K07375+K02985+K05692+K05749+K05749+K05754+K03173+K07937+K07937+K07937+K07937+K07937+K07374+K07374+K07374+K07374+K04467+K04467+K05757+K04392+K18441+K04440+K07874+K04448+K07375+K14007+K03175+K02580+K14007+K02159+K07941+K03175+K00134+K00134+…
Human Diseases	Endocrine and metabolic diseases	Non-alcoholic fatty liver disease (NAFLD)	84	ko04932	Cg03833;Cg03887;Cg03928;Cg03968;Cg03969;Cg04042;Cg05025;Cg05514;Cg05663;Cg05778;Cg06131;Cg06240;Cg06523;Cg06744;Cg06847;Cg07130;Cg09291;Cg09756;Cg12039;Cg12068;Cg13241;Cg13423;Cg14029;Cg14919;Cg15522;Cg15817;Cg16689;Cg16690;Cg16846;Cg16958;Cg18108;Cg18235;Cg18251;Cg18252;Cg18484;Cg18531;Cg18602;Cg18659;Cg18698;Cg19029;Cg19600;Cg19716;Cg19745;Cg19888;Cg19904;Cg19962;Cg20128;Cg20129;Cg20608;Cg21184…	K00235+K02266+K02266+K00411+K00411+K03943+K04393+K03961+K00922+K02649+K02263+K03941+K00413+K09027+K03936+K00922+K03964+K04526+K11351+K11352+K03173+K00236+K03935+K03949+K03173+K03959+K02649+K02649+K03237+K00415+K03950+K08852+K03955+K04392+K04440+K02265+K00416+K03951+K04448+K03939+K02580+K07198+K03963+K03966+K04374+K07198+K16172+K16172+K02159+K03948+K03953+K00234+K03942+K03944+K00237+K04392+K04389+…
Organismal Systems	Digestive system	Gastric acid secretion	84	ko04971	Cg00289;Cg00320;Cg01265;Cg01266;Cg03599;Cg04628;Cg05707;Cg06183;Cg06851;Cg13681;Cg13748;Cg13966;Cg14822;Cg17621;Cg17622;Cg17964;Cg18224;Cg18444;Cg18445;Cg20596;Cg20694;Cg20986;Cg21123;Cg21124;Cg21518;Cg21950;Cg22229;Cg22232;Cg22449;Cg22867;Cg22872;Cg22873;Cg22874;Cg22875;Cg22974;Cg24610;Cg26206;Cg26608;Cg26811;Cg27066;Cg27067;Cg27068;Cg27069;Cg27070;Cg27071;Cg27072;Cg27073;Cg27077;Cg27078;Cg27079…	K02183+K02183+K02183+K02183+K04218+K08042+K04150+K02183+K02183+K05692+K08049+K02183+K02183+K02183+K02183+K04515+K02677+K04345+K04345+K02183+K04131+K02183+K02183+K02183+K02183+K02183+K04218+K02183+K02183+K02183+K02183+K02183+K02183+K02183+K04195+K02183+K18245+K04131+K05858+K02183+K02183+K02183+K02183+K02183+K02183+K02183+K02183+K02183+K02183+K02183+K02183+K02183+K02183+K02183+K05858+K02183+K02183+…
Human Diseases	Infectious diseases	Pertussis	83	ko05133	Cg00289;Cg00320;Cg01265;Cg01266;Cg03498;Cg06183;Cg06851;Cg06987;Cg06988;Cg06990;Cg08935;Cg13966;Cg14822;Cg17621;Cg17622;Cg18484;Cg18698;Cg19540;Cg19600;Cg20596;Cg20986;Cg21123;Cg21124;Cg21518;Cg21950;Cg22232;Cg22409;Cg22449;Cg22867;Cg22872;Cg22873;Cg22874;Cg22875;Cg24610;Cg24912;Cg26330;Cg26332;Cg27066;Cg27067;Cg27068;Cg27069;Cg27070;Cg27071;Cg27072;Cg27073;Cg27077;Cg27078;Cg27079;Cg27080;Cg27082…	K02183+K02183+K02183+K02183+K04371+K02183+K02183+K04513+K04513+K04513+K10160+K02183+K02183+K02183+K02183+K04440+K04448+K03175+K02580+K02183+K02183+K02183+K02183+K02183+K02183+K02183+K03175+K02183+K02183+K02183+K02183+K02183+K02183+K02183+K05719+K02187+K02187+K02183+K02183+K02183+K02183+K02183+K02183+K02183+K02183+K02183+K02183+K02183+K02183+K02183+K02183+K02183+K02183+K02183+K02183+K02183+K02183+…
Human Diseases	Infectious diseases	Measles	83	ko05162	Cg01541;Cg01542;Cg01745;Cg02028;Cg02064;Cg02067;Cg02068;Cg02075;Cg02118;Cg04643;Cg05231;Cg05663;Cg05778;Cg06151;Cg07130;Cg08283;Cg08652;Cg08933;Cg08935;Cg08940;Cg08944;Cg09517;Cg09611;Cg09739;Cg10720;Cg10724;Cg10730;Cg10736;Cg10739;Cg12265;Cg12266;Cg12848;Cg12849;Cg16291;Cg16689;Cg16690;Cg16846;Cg17061;Cg17505;Cg17506;Cg17507;Cg17918;Cg18231;Cg18232;Cg18484;Cg18698;Cg18783;Cg19540;Cg19600;Cg20195…	K06563+K06563+K06563+K06563+K06563+K06563+K06563+K06563+K06563+K16194+K06563+K00922+K02649+K03097+K00922+K06563+K06563+K10159+K10160+K10159+K10159+K14021+K10151+K04427+K05410+K05410+K05410+K05410+K05410+K05410+K05410+K05410+K05410+K03115+K02649+K02649+K03237+K10144+K03283+K03283+K03283+K03283+K04467+K04467+K04440+K04448+K03247+K03175+K02580+K03283+K02159+K02206+K03175+K06563+K03097+K04389+K02187+…
Environmental Information Processing	Signal transduction	Phospholipase D signaling pathway	81	ko04072	Cg01139;Cg03498;Cg04628;Cg04661;Cg05663;Cg05723;Cg05724;Cg05725;Cg05778;Cg06935;Cg06987;Cg06988;Cg06990;Cg07130;Cg07853;Cg08117;Cg08553;Cg09100;Cg09104;Cg09475;Cg09756;Cg11434;Cg12326;Cg12645;Cg13656;Cg13748;Cg14047;Cg15443;Cg15484;Cg15519;Cg15826;Cg16257;Cg16689;Cg16690;Cg17248;Cg17249;Cg17443;Cg17444;Cg17491;Cg17492;Cg17493;Cg17494;Cg17495;Cg17616;Cg18224;Cg18258;Cg18303;Cg18342;Cg18551;Cg18957…	K00889+K04371+K08042+K07937+K00922+K01116+K01116+K01116+K02649+K07203+K04513+K04513+K04513+K00922+K07937+K13523+K07830+K00901+K00901+K01115+K04526+K04606+K01313+K04610+K01528+K08049+K13509+K04226+K13509+K16342+K04361+K07206+K02649+K02649+K04718+K04718+K04718+K04718+K07937+K07937+K07937+K07937+K07937+K04364+K02677+K18441+K01080+K00901+K07207+K19007+K01080+K01080+K00901+K01080+K00901+K07941+K07208+…
Environmental Information Processing	Signal transduction	Wnt signaling pathway	81	ko04310	Cg01198;Cg01320;Cg02695;Cg04454;Cg05043;Cg05072;Cg05233;Cg05967;Cg06151;Cg06987;Cg06988;Cg06990;Cg07033;Cg08833;Cg09245;Cg09302;Cg09565;Cg09611;Cg09739;Cg10477;Cg11466;Cg11693;Cg11831;Cg12066;Cg12811;Cg12813;Cg12985;Cg13409;Cg13416;Cg13417;Cg13740;Cg13746;Cg14071;Cg14664;Cg14667;Cg14745;Cg15715;Cg16189;Cg16190;Cg16191;Cg16192;Cg16291;Cg16308;Cg16377;Cg16641;Cg17671;Cg17964;Cg17970;Cg18224;Cg18252…	K02085+K23605+K04501+K08957+K04468+K00408+K16273+K03213+K03097+K04513+K04513+K04513+K02353+K19882+K02354+K02842+K19882+K10151+K04427+K01691+K04511+K01558+K00572+K00182+K00181+K04499+K00444+K02432+K02432+K02432+K04498+K04498+K04507+K02375+K02375+K19626+K03868+K01064+K03209+K00445+K01357+K03115+K22471+K02105+K03068+K02157+K04515+K04348+K02677+K04392+K04345+K04345+K04440+K00714+K04448+K23097+K04491+…
Organismal Systems	Endocrine system	Aldosterone synthesis and secretion	80	ko04925	Cg00289;Cg00320;Cg01265;Cg01266;Cg04628;Cg06183;Cg06472;Cg06851;Cg13748;Cg13966;Cg14227;Cg14822;Cg17621;Cg17622;Cg17964;Cg18224;Cg18444;Cg18445;Cg19904;Cg20596;Cg20986;Cg21123;Cg21124;Cg21518;Cg21950;Cg22232;Cg22449;Cg22867;Cg22872;Cg22873;Cg22874;Cg22875;Cg24610;Cg26525;Cg26811;Cg27066;Cg27067;Cg27068;Cg27069;Cg27070;Cg27071;Cg27072;Cg27073;Cg27077;Cg27078;Cg27079;Cg27080;Cg27082;Cg27083;Cg27085…	K02183+K02183+K02183+K02183+K08042+K02183+K13885+K02183+K08049+K02183+K18283+K02183+K02183+K02183+K04515+K02677+K04345+K04345+K04374+K02183+K02183+K02183+K02183+K02183+K02183+K02183+K02183+K02183+K02183+K02183+K02183+K02183+K02183+K18050+K05858+K02183+K02183+K02183+K02183+K02183+K02183+K02183+K02183+K02183+K02183+K02183+K02183+K02183+K02183+K02183+K05858+K02183+K02183+K02183+K02183+K02183+K02183+…
Metabolism	Lipid metabolism	Glycerophospholipid metabolism	79	ko00564	Cg04180;Cg04325;Cg04453;Cg04551;Cg04888;Cg05891;Cg05941;Cg06207;Cg06208;Cg06618;Cg08117;Cg09100;Cg09104;Cg09187;Cg09475;Cg09695;Cg11881;Cg14047;Cg14427;Cg14428;Cg14429;Cg14430;Cg15000;Cg15484;Cg15519;Cg16607;Cg16788;Cg17069;Cg17427;Cg17935;Cg18031;Cg18110;Cg18130;Cg18303;Cg18342;Cg18650;Cg18957;Cg19334;Cg19823;Cg19885;Cg20305;Cg20310;Cg20359;Cg20408;Cg20671;Cg20714;Cg21026;Cg21455;Cg21859;Cg22036…	K01047+K06129+K13510+K01047+K01613+K13515+K01047+K01047+K01047+K05929+K13523+K00901+K00901+K16817+K01115+K01047+K13511+K13509+K16817+K16817+K16817+K16817+K00111+K13509+K16342+K18695+K00993+K14286+K00995+K01517+K06130+K00981+K00623+K01080+K00901+K00967+K19007+K01080+K01047+K14286+K15728+K01080+K00901+K08730+K08729+K00006+K01080+K00901+K14156+K00894+K13644+K13517+K00006+K00901+K13506+K16342+K16342+…
Environmental Information Processing	Signal transduction	FoxO signaling pathway	79	ko04068	Cg01320;Cg02695;Cg03498;Cg03744;Cg03745;Cg04873;Cg05043;Cg05092;Cg05663;Cg05778;Cg06174;Cg06469;Cg07130;Cg07863;Cg08923;Cg09263;Cg09611;Cg09756;Cg10025;Cg10026;Cg11316;Cg11493;Cg13270;Cg13740;Cg13746;Cg15579;Cg15826;Cg16094;Cg16679;Cg16689;Cg16690;Cg16839;Cg16971;Cg16973;Cg17616;Cg18193;Cg18231;Cg18232;Cg18484;Cg18504;Cg18912;Cg18916;Cg19034;Cg19391;Cg19393;Cg19397;Cg19588;Cg19649;Cg19716;Cg19962…	K23605+K04501+K04371+K01596+K01596+K08341+K04468+K16332+K00922+K02649+K05868+K08341+K00922+K09408+K06643+K04564+K10151+K04526+K03781+K03781+K10305+K04365+K04674+K04498+K04498+K07298+K04361+K08863+K03875+K02649+K02649+K07298+K04402+K04402+K04364+K08861+K04467+K04467+K04440+K11411+K13304+K10305+K01110+K04402+K04402+K04402+K06276+K08336+K07198+K07198+K16172+K16172+K02206+K15618+K06631+K07827+K07827+…
Cellular Processes	Cell motility	Regulation of actin cytoskeleton	79	ko04810	Cg00428;Cg00569;Cg00571;Cg00572;Cg01139;Cg01198;Cg01777;Cg03498;Cg04208;Cg05025;Cg05531;Cg05561;Cg05663;Cg05778;Cg06489;Cg06987;Cg06988;Cg06990;Cg07130;Cg07956;Cg08553;Cg09756;Cg10418;Cg11137;Cg11493;Cg11510;Cg12326;Cg13681;Cg13931;Cg13932;Cg14329;Cg15280;Cg15826;Cg16689;Cg16690;Cg18238;Cg18252;Cg19085;Cg19497;Cg20694;Cg21408;Cg21409;Cg22592;Cg22688;Cg24609;Cg24912;Cg25834;Cg25908;Cg26608;Cg26892…	K23612+K23612+K23612+K23612+K00889+K02085+K23612+K04371+K05756+K04393+K06269+K06493+K00922+K02649+K03915+K04513+K04513+K04513+K00922+K23612+K07830+K04526+K23612+K05755+K04365+K05717+K01313+K05692+K05749+K05749+K05740+K05754+K04361+K02649+K02649+K05757+K04392+K05704+K06269+K04131+K00921+K00921+K07827+K07827+K04392+K05719+K04393+K04368+K04131+K23612+K04393+K06269+K06269+K06269+K06269+K06269+K06269+…
Metabolism	Global and overview maps	Biosynthesis of amino acids	78	ko01230	Cg00288;Cg00319;Cg01192;Cg01193;Cg01194;Cg02711;Cg02900;Cg03164;Cg03954;Cg04669;Cg04748;Cg05007;Cg05372;Cg05373;Cg05521;Cg05522;Cg05523;Cg05774;Cg06763;Cg06764;Cg07035;Cg07773;Cg08445;Cg09162;Cg09581;Cg10321;Cg10324;Cg10516;Cg11875;Cg12201;Cg12796;Cg13753;Cg14338;Cg14629;Cg14776;Cg15577;Cg15578;Cg15753;Cg16542;Cg16616;Cg17608;Cg18433;Cg19223;Cg19509;Cg19547;Cg20050;Cg20051;Cg20068;Cg20228;Cg20718…	K00831+K00831+K00615+K00615+K00615+K00873+K01681+K01681+K00815+K01689+K01623+K00814+K01915+K01915+K01915+K01915+K01915+K01803+K17989+K17989+K01755+K00500+K01915+K00500+K00616+K14677+K14677+K00030+K00615+K00814+K01079+K00948+K00789+K01940+K00927+K01915+K01915+K01807+K00030+K01697+K01620+K01754+K01758+K00600+K00789+K00286+K00286+K00850+K00548+K00600+K00548+K00031+K00031+K01783+K00826+K00134+K00134+…
Metabolism	Energy metabolism	Oxidative phosphorylation	77	ko00190	Cg03833;Cg03887;Cg03928;Cg03968;Cg03969;Cg04042;Cg05321;Cg05514;Cg06131;Cg06240;Cg06523;Cg06847;Cg07998;Cg09291;Cg09766;Cg10111;Cg10493;Cg12039;Cg12068;Cg12839;Cg13423;Cg13884;Cg14029;Cg14919;Cg15609;Cg15817;Cg16204;Cg16466;Cg16902;Cg16958;Cg17260;Cg17391;Cg17454;Cg18108;Cg18251;Cg18447;Cg18531;Cg18602;Cg18659;Cg19029;Cg19084;Cg19611;Cg19706;Cg19745;Cg19888;Cg19972;Cg20027;Cg20437;Cg20734;Cg21184…	K00235+K02266+K02266+K00411+K00411+K03943+K02146+K03961+K02263+K03941+K00413+K03936+K02150+K03964+K02137+K02127+K02136+K11351+K11352+K03662+K00236+K02155+K03935+K03949+K02152+K03959+K02140+K02145+K02134+K00415+K02258+K02130+K02258+K03950+K03955+K03661+K02265+K00416+K03951+K03939+K11726+K02257+K02154+K03963+K03966+K02154+K02144+K02154+K02151+K03948+K03953+K02128+K00234+K02148+K03942+K03944+K00237+…
Organismal Systems	Sensory system	Olfactory transduction	77	ko04740	Cg00289;Cg00320;Cg01265;Cg01266;Cg06183;Cg06788;Cg06842;Cg06851;Cg13118;Cg13966;Cg14227;Cg14822;Cg17621;Cg17622;Cg17964;Cg18444;Cg18445;Cg20596;Cg20986;Cg21123;Cg21124;Cg21518;Cg21950;Cg22232;Cg22449;Cg22867;Cg22872;Cg22873;Cg22874;Cg22875;Cg23508;Cg23509;Cg23521;Cg23522;Cg24610;Cg27066;Cg27067;Cg27068;Cg27069;Cg27070;Cg27071;Cg27072;Cg27073;Cg27077;Cg27078;Cg27079;Cg27080;Cg27082;Cg27083;Cg27085…	K02183+K02183+K02183+K02183+K02183+K00910+K00910+K02183+K13755+K02183+K18283+K02183+K02183+K02183+K04515+K04345+K04345+K02183+K02183+K02183+K02183+K02183+K02183+K02183+K02183+K02183+K02183+K02183+K02183+K02183+K04439+K04439+K04439+K04439+K02183+K02183+K02183+K02183+K02183+K02183+K02183+K02183+K02183+K02183+K02183+K02183+K02183+K02183+K02183+K02183+K02183+K02183+K02183+K02183+K02183+K02183+K02183+…
Human Diseases	Cancers	Breast cancer	77	ko05224	Cg01198;Cg03498;Cg04454;Cg04606;Cg04607;Cg05072;Cg05145;Cg05148;Cg05663;Cg05768;Cg05775;Cg05778;Cg06797;Cg06830;Cg06863;Cg06935;Cg07033;Cg07130;Cg08677;Cg09245;Cg09302;Cg09517;Cg11493;Cg11693;Cg11831;Cg12066;Cg12985;Cg13034;Cg13409;Cg13416;Cg13417;Cg13508;Cg13900;Cg14664;Cg14667;Cg15826;Cg16189;Cg16190;Cg16191;Cg16192;Cg16377;Cg16641;Cg16689;Cg16690;Cg16971;Cg16973;Cg17616;Cg17671;Cg18579;Cg18698…	K02085+K04371+K08957+K06054+K06054+K00408+K06051+K06051+K00922+K04688+K10140+K02649+K06054+K06054+K06054+K07203+K02353+K00922+K21635+K02354+K02842+K14021+K04365+K01558+K00572+K00182+K00444+K06051+K02432+K02432+K02432+K02599+K06051+K02375+K02375+K04361+K01064+K03209+K00445+K01357+K02105+K03068+K02649+K02649+K04402+K04402+K04364+K02157+K00714+K04448+K01110+K04491+K04377+K04402+K04402+K04402+K02159+…
Genetic Information Processing	Folding, sorting and degradation	RNA degradation	76	ko03018	Cg00477;Cg00646;Cg00686;Cg00981;Cg01022;Cg03241;Cg04080;Cg04087;Cg04184;Cg04627;Cg04669;Cg04920;Cg04990;Cg05133;Cg05183;Cg05592;Cg05963;Cg07671;Cg07814;Cg07954;Cg10606;Cg11097;Cg11131;Cg11381;Cg11387;Cg11471;Cg11835;Cg13121;Cg13667;Cg13962;Cg14344;Cg14805;Cg16115;Cg16592;Cg16593;Cg16663;Cg18004;Cg18424;Cg18508;Cg18795;Cg19148;Cg19421;Cg19635;Cg19750;Cg20068;Cg20618;Cg20851;Cg21916;Cg21926;Cg21945…	K03654+K03654+K03654+K12626+K12602+K03654+K11600+K01148+K12604+K12593+K01689+K16855+K14442+K12618+K12607+K12589+K03514+K12617+K12605+K03654+K12627+K12610+K12584+K14443+K14443+K03654+K03654+K12614+K12581+K12606+K03654+K14443+K12586+K12599+K12599+K12572+K01148+K03681+K12590+K18681+K12623+K12580+K14443+K12598+K00850+K03654+K10643+K13126+K13126+K12587+K04043+K12591+K01689+K03654+K12620+K07573+K03654+…
Human Diseases	Infectious diseases	HTLV-I infection	76	ko05166	Cg01320;Cg01403;Cg02593;Cg02695;Cg03277;Cg03498;Cg03621;Cg04628;Cg05663;Cg05778;Cg07130;Cg09611;Cg10084;Cg10565;Cg12008;Cg12710;Cg13270;Cg13740;Cg13746;Cg13748;Cg14077;Cg14337;Cg14393;Cg15188;Cg16689;Cg16690;Cg17067;Cg17970;Cg18231;Cg18232;Cg18426;Cg18444;Cg18445;Cg18484;Cg18698;Cg18793;Cg18986;Cg19034;Cg19366;Cg19436;Cg19600;Cg19904;Cg20608;Cg20920;Cg22592;Cg22688;Cg23255;Cg23387;Cg23850;Cg24627…	K23605+K03120+K03120+K04501+K03120+K04371+K03352+K08042+K00922+K02649+K00922+K10151+K05770+K08057+K03120+K06062+K04674+K04498+K04498+K08049+K08054+K03357+K03350+K03349+K02649+K02649+K02330+K04348+K04467+K04467+K04416+K04345+K04345+K04440+K04448+K08057+K03120+K01110+K04377+K03363+K02580+K04374+K02159+K02206+K07827+K07827+K03353+K03351+K03363+K09203+K04368+K14290+K21770+K06268+K04570+K04570+K04456+…
Human Diseases	Cancers	Viral carcinogenesis	76	ko05203	Cg01258;Cg01403;Cg02593;Cg02711;Cg03277;Cg03498;Cg05025;Cg05092;Cg05321;Cg05663;Cg05757;Cg05778;Cg06987;Cg06988;Cg06990;Cg07130;Cg08258;Cg08923;Cg09517;Cg09611;Cg12008;Cg12710;Cg13241;Cg13740;Cg13746;Cg14062;Cg14508;Cg14634;Cg15522;Cg16679;Cg16689;Cg16690;Cg17067;Cg17616;Cg18151;Cg18252;Cg18444;Cg18445;Cg18698;Cg18986;Cg19085;Cg19269;Cg19295;Cg19436;Cg19600;Cg19904;Cg20608;Cg20920;Cg21025;Cg22592…	K03123+K03120+K03120+K00873+K03120+K04371+K04393+K16332+K02146+K00922+K03142+K02649+K04513+K04513+K04513+K00922+K03136+K06643+K14021+K10151+K03120+K06062+K03173+K04498+K04498+K03124+K10587+K03144+K03173+K03875+K02649+K02649+K02330+K04364+K06067+K04392+K04345+K04345+K04448+K03120+K05704+K03137+K03137+K03363+K02580+K04374+K02159+K02206+K10610+K07827+K03141+K07827+K03141+K06053+K03363+K04392+K04393+…
Human Diseases	Drug resistance	Platinum drug resistance	75	ko01524	Cg01033;Cg03498;Cg03652;Cg03653;Cg04750;Cg04751;Cg05187;Cg05663;Cg05706;Cg05778;Cg07130;Cg07344;Cg07346;Cg07352;Cg07358;Cg07363;Cg07365;Cg07368;Cg07641;Cg07898;Cg07899;Cg07900;Cg07910;Cg07911;Cg08212;Cg08543;Cg08544;Cg08923;Cg09085;Cg09336;Cg09472;Cg09473;Cg09517;Cg09566;Cg09568;Cg10089;Cg11224;Cg12204;Cg12205;Cg12206;Cg13536;Cg14777;Cg16689;Cg16690;Cg19519;Cg19588;Cg20311;Cg20608;Cg21333;Cg21717…	K10847+K04371+K00799+K00799+K00799+K00799+K00799+K00922+K00799+K02649+K00922+K16060+K16060+K16060+K16060+K16060+K16060+K16060+K16060+K16060+K16060+K16060+K16060+K16060+K16060+K00799+K00799+K06643+K16060+K16060+K00799+K00799+K14021+K23790+K23790+K02350+K00799+K00799+K00799+K00799+K00799+K00799+K02649+K02649+K00799+K06276+K00799+K02159+K08737+K00799+K00799+K00799+K04389+K00799+K02187+K02187+K04570+…
Environmental Information Processing	Signal transduction	Hippo signaling pathway	75	ko04390	Cg01198;Cg01320;Cg02695;Cg04681;Cg05072;Cg05531;Cg05731;Cg05967;Cg07033;Cg07344;Cg07346;Cg07352;Cg07358;Cg07363;Cg07365;Cg07368;Cg07641;Cg07898;Cg07899;Cg07900;Cg07910;Cg07911;Cg08212;Cg09085;Cg09245;Cg09302;Cg09336;Cg09611;Cg11693;Cg11831;Cg12066;Cg12985;Cg13053;Cg13065;Cg13270;Cg13409;Cg13416;Cg13417;Cg13681;Cg14664;Cg14667;Cg16189;Cg16190;Cg16191;Cg16192;Cg16377;Cg17671;Cg17915;Cg18024;Cg18223…	K02085+K23605+K04501+K06069+K00408+K06269+K06093+K03213+K02353+K16060+K16060+K16060+K16060+K16060+K16060+K16060+K16060+K16060+K16060+K16060+K16060+K16060+K16060+K16060+K02354+K02842+K16060+K10151+K01558+K00572+K00182+K00444+K03456+K03456+K04674+K02432+K02432+K02432+K05692+K02375+K02375+K01064+K03209+K00445+K01357+K02105+K02157+K21283+K17693+K13578+K00714+K04491+K04377+K06269+K04382+K16621+K04671+…
Human Diseases	Neurodegenerative diseases	Parkinson disease	75	ko05012	Cg03833;Cg03887;Cg03928;Cg03968;Cg03969;Cg04042;Cg04799;Cg05252;Cg05514;Cg06131;Cg06240;Cg06270;Cg06523;Cg06847;Cg06888;Cg07361;Cg08312;Cg09116;Cg09291;Cg09766;Cg10056;Cg10111;Cg10493;Cg11241;Cg11293;Cg11297;Cg12039;Cg12068;Cg12541;Cg13115;Cg13389;Cg13423;Cg14002;Cg14029;Cg14480;Cg14919;Cg15817;Cg16902;Cg16958;Cg18108;Cg18251;Cg18444;Cg18445;Cg18531;Cg18602;Cg18659;Cg19029;Cg19685;Cg19745;Cg19888…	K00235+K02266+K02266+K00411+K00411+K03943+K10575+K04552+K03961+K02263+K03941+K05688+K00413+K03936+K04554+K00501+K04266+K10578+K03964+K02137+K04556+K02127+K02136+K03178+K03178+K03178+K11351+K11352+K04145+K04145+K04145+K00236+K04555+K03935+K03178+K03949+K03959+K02134+K00415+K03950+K03955+K04345+K04345+K02265+K00416+K03951+K03939+K04555+K03963+K03966+K04555+K03948+K03953+K02128+K00234+K03942+K03944+…
Genetic Information Processing	Translation	Ribosome biogenesis in eukaryotes	74	ko03008	Cg03619;Cg04977;Cg05133;Cg05222;Cg05287;Cg05396;Cg05498;Cg05920;Cg06151;Cg06666;Cg07435;Cg07437;Cg07439;Cg07442;Cg07454;Cg08873;Cg09361;Cg10525;Cg13342;Cg13426;Cg13585;Cg13864;Cg13883;Cg15864;Cg15908;Cg16280;Cg16291;Cg16413;Cg16855;Cg16865;Cg17079;Cg17195;Cg17326;Cg17634;Cg18032;Cg18172;Cg18476;Cg18768;Cg19179;Cg19458;Cg19709;Cg19950;Cg19969;Cg20070;Cg21287;Cg24038;Cg24101;Cg24129;Cg24648;Cg24847…	K03264+K14530+K12618+K14548+K11883+K14568+K14568+K14574+K03097+K03538+K14572+K14572+K14572+K14572+K14567+K14573+K14556+K14561+K03685+K14565+K14553+K14563+K14558+K06943+K06943+K14575+K03115+K14539+K14550+K14554+K14557+K14537+K14537+K14570+K01164+K11108+K07178+K14570+K12845+K14569+K14555+K11128+K14555+K07562+K14521+K14564+K03264+K11131+K03097+K12845+K14558+K14523+K14559+K14544+K14549+K03537+K14571+…
Metabolism	Metabolism of other amino acids	Glutathione metabolism	73	ko00480	Cg00238;Cg03652;Cg03653;Cg04389;Cg04689;Cg04708;Cg04746;Cg04750;Cg04751;Cg05187;Cg05406;Cg05706;Cg05737;Cg05999;Cg06006;Cg08543;Cg08544;Cg08594;Cg09472;Cg09473;Cg09566;Cg09568;Cg09618;Cg11102;Cg11224;Cg11326;Cg11331;Cg11332;Cg11333;Cg11334;Cg11335;Cg11336;Cg12119;Cg12120;Cg12204;Cg12205;Cg12206;Cg13024;Cg13286;Cg13536;Cg14035;Cg14777;Cg16600;Cg17027;Cg17163;Cg17296;Cg18339;Cg18453;Cg18707;Cg19453…	K11140+K00799+K00799+K00797+K04097+K04097+K00797+K00799+K00799+K00799+K00033+K00799+K00682+K18592+K13299+K00799+K00799+K00432+K00799+K00799+K23790+K23790+K11140+K04097+K00799+K04097+K04097+K04097+K04097+K04097+K04097+K04097+K00802+K00802+K00799+K00799+K00799+K00036+K00681+K00799+K18592+K00799+K11205+K00681+K10808+K10808+K00432+K01581+K00432+K00432+K00799+K05360+K00799+K04097+K00799+K00799+K00031+…
Environmental Information Processing	Signal transduction	Sphingolipid signaling pathway	73	ko04071	Cg03488;Cg03498;Cg04146;Cg04147;Cg04148;Cg04218;Cg05663;Cg05778;Cg05860;Cg06987;Cg06988;Cg06990;Cg07130;Cg09159;Cg09475;Cg13053;Cg13065;Cg13241;Cg13988;Cg15145;Cg15522;Cg16177;Cg16689;Cg16690;Cg17248;Cg17249;Cg17443;Cg17444;Cg18224;Cg18252;Cg18482;Cg18484;Cg18979;Cg19034;Cg19229;Cg19247;Cg19588;Cg19600;Cg19756;Cg20206;Cg20513;Cg20608;Cg21134;Cg22592;Cg22688;Cg23369;Cg23987;Cg24609;Cg25671;Cg25908…	K12350+K04371+K05665+K05665+K05665+K05665+K00922+K02649+K05665+K04513+K04513+K04513+K00922+K00654+K01115+K03456+K03456+K03173+K12351+K12348+K03173+K05665+K02649+K02649+K04718+K04718+K04718+K04718+K02677+K04392+K01634+K04440+K12349+K01110+K00654+K00654+K06276+K02580+K04382+K01634+K05665+K02159+K01379+K07827+K07827+K11583+K04354+K04392+K04712+K04368+K18050+K11583+K05858+K05858+K11584+K04716+K04456+…
Organismal Systems	Sensory system	Phototransduction - fly	73	ko04745	Cg00289;Cg00320;Cg01265;Cg01266;Cg06183;Cg06788;Cg06842;Cg06851;Cg13681;Cg13966;Cg14822;Cg17621;Cg17622;Cg17964;Cg18224;Cg20596;Cg20986;Cg21123;Cg21124;Cg21518;Cg21950;Cg22232;Cg22449;Cg22867;Cg22872;Cg22873;Cg22874;Cg22875;Cg24610;Cg26811;Cg27066;Cg27067;Cg27068;Cg27069;Cg27070;Cg27071;Cg27072;Cg27073;Cg27077;Cg27078;Cg27079;Cg27080;Cg27082;Cg27083;Cg27085;Cg27311;Cg27410;Cg28197;Cg28198;Cg28199…	K02183+K02183+K02183+K02183+K02183+K00910+K00910+K02183+K05692+K02183+K02183+K02183+K02183+K04515+K02677+K02183+K02183+K02183+K02183+K02183+K02183+K02183+K02183+K02183+K02183+K02183+K02183+K02183+K02183+K05858+K02183+K02183+K02183+K02183+K02183+K02183+K02183+K02183+K02183+K02183+K02183+K02183+K02183+K02183+K02183+K05858+K02183+K02183+K02183+K02183+K02183+K02183+K02183+K02183+K02183+K02183+K02183+…
Human Diseases	Infectious disease: bacterial	Yersinia infection	72	ko05135	Cg00428;Cg00569;Cg00571;Cg00572;Cg01139;Cg01777;Cg03498;Cg04365;Cg05025;Cg05663;Cg05723;Cg05724;Cg05725;Cg05778;Cg06987;Cg06988;Cg06990;Cg07130;Cg07956;Cg08935;Cg09481;Cg09739;Cg10418;Cg10720;Cg10724;Cg10730;Cg10736;Cg10739;Cg11510;Cg12265;Cg12266;Cg12848;Cg12849;Cg13241;Cg13681;Cg13703;Cg15522;Cg16689;Cg16690;Cg18231;Cg18232;Cg18252;Cg18484;Cg18698;Cg19085;Cg19540;Cg19600;Cg22402;Cg22409;Cg24609…	K23612+K23612+K23612+K23612+K00889+K23612+K04371+K12487+K04393+K00922+K01116+K01116+K01116+K02649+K04513+K04513+K04513+K00922+K23612+K10160+K04373+K04427+K23612+K05410+K05410+K05410+K05410+K05410+K05717+K05410+K05410+K05410+K05410+K03173+K05692+K04431+K03173+K02649+K02649+K04467+K04467+K04392+K04440+K04448+K05704+K03175+K02580+K07941+K03175+K04392+K05719+K04393+K04368+K23612+K04393+K04456+K04456+…
Human Diseases	Infectious diseases	Hepatitis B	71	ko05161	Cg01320;Cg02695;Cg03498;Cg05663;Cg05775;Cg05778;Cg07130;Cg08933;Cg08935;Cg08940;Cg08944;Cg09739;Cg10720;Cg10724;Cg10730;Cg10736;Cg10739;Cg11493;Cg12265;Cg12266;Cg12839;Cg12848;Cg12849;Cg13270;Cg13703;Cg13740;Cg13746;Cg16689;Cg16690;Cg17616;Cg17958;Cg18224;Cg18231;Cg18232;Cg18426;Cg18484;Cg18698;Cg19085;Cg19366;Cg19540;Cg19600;Cg19904;Cg20608;Cg20920;Cg21025;Cg21558;Cg21691;Cg21692;Cg21693;Cg21694…	K23605+K04501+K04371+K00922+K10140+K02649+K00922+K10159+K10160+K10159+K10159+K04427+K05410+K05410+K05410+K05410+K05410+K04365+K05410+K05410+K03662+K05410+K05410+K04674+K04431+K04498+K04498+K02649+K02649+K04364+K04802+K02677+K04467+K04467+K04416+K04440+K04448+K05704+K04377+K03175+K02580+K04374+K02159+K02206+K10610+K04447+K04447+K04447+K04447+K04447+K03175+K07827+K07827+K04389+K04368+K02187+K02187+…
Genetic Information Processing	Translation	mRNA surveillance pathway	70	ko03015	Cg03978;Cg04009;Cg04160;Cg04538;Cg04586;Cg04587;Cg05106;Cg05221;Cg05531;Cg05971;Cg06286;Cg06391;Cg07318;Cg07423;Cg08182;Cg08431;Cg09040;Cg10278;Cg10573;Cg11228;Cg13053;Cg13065;Cg13578;Cg13919;Cg13920;Cg13956;Cg14999;Cg15197;Cg15272;Cg17393;Cg18054;Cg18055;Cg18244;Cg18326;Cg19001;Cg19061;Cg19360;Cg19497;Cg19756;Cg20447;Cg21916;Cg21926;Cg23369;Cg23756;Cg23987;Cg24484;Cg24486;Cg24514;Cg24516;Cg25961…	K00565+K06965+K11124+K12876+K15544+K15542+K14396+K14401+K06269+K12875+K14397+K14411+K13171+K12883+K14407+K14324+K14408+K14327+K14376+K14962+K03456+K03456+K14405+K12812+K12812+K14400+K14323+K14409+K14406+K12881+K08873+K08873+K14325+K03267+K14416+K14404+K12877+K06269+K04382+K14403+K13126+K13126+K11583+K14328+K04354+K03265+K03265+K03265+K03265+K06100+K11583+K13025+K11125+K11584+K13114+K14376+K06269+…
Cellular Processes	Cell growth and death	Necroptosis	70	ko04217	Cg03488;Cg04058;Cg05372;Cg05373;Cg05521;Cg05522;Cg05523;Cg05607;Cg06922;Cg06923;Cg07344;Cg07346;Cg07352;Cg07358;Cg07363;Cg07365;Cg07368;Cg07641;Cg07897;Cg07898;Cg07899;Cg07900;Cg07910;Cg07911;Cg08212;Cg08412;Cg08445;Cg08640;Cg08935;Cg09085;Cg09233;Cg09336;Cg09599;Cg13241;Cg15130;Cg15519;Cg15522;Cg15577;Cg15578;Cg17964;Cg18246;Cg18484;Cg19651;Cg20608;Cg21558;Cg21691;Cg21692;Cg21693;Cg21694;Cg23148…	K12350+K15637+K01915+K01915+K01915+K01915+K01915+K12197+K12196+K12196+K16060+K16060+K16060+K16060+K16060+K16060+K16060+K16060+K12192+K16060+K16060+K16060+K16060+K16060+K16060+K12191+K01915+K00688+K10160+K16060+K21421+K16060+K12197+K03173+K14381+K16342+K03173+K01915+K01915+K04515+K12198+K04440+K12195+K02159+K04447+K04447+K04447+K04447+K04447+K12193+K16342+K16342+K15053+K04721+K04389+K04721+K04079+…
Metabolism	Lipid metabolism	Arachidonic acid metabolism	69	ko00590	Cg04180;Cg04464;Cg04465;Cg04466;Cg04469;Cg04470;Cg04551;Cg04689;Cg04708;Cg05941;Cg05999;Cg06207;Cg06208;Cg08594;Cg08888;Cg09187;Cg09695;Cg11102;Cg11326;Cg11331;Cg11332;Cg11333;Cg11334;Cg11335;Cg11336;Cg11470;Cg11473;Cg13112;Cg14035;Cg14072;Cg14357;Cg14427;Cg14428;Cg14429;Cg14430;Cg15512;Cg15517;Cg15518;Cg15519;Cg18339;Cg18707;Cg19453;Cg19823;Cg21078;Cg22153;Cg22753;Cg23851;Cg23852;Cg25969;Cg26094…	K01047+K00079+K00079+K00079+K00079+K00079+K01047+K04097+K04097+K01047+K18592+K01047+K01047+K00432+K08022+K16817+K01047+K04097+K04097+K04097+K04097+K04097+K04097+K04097+K04097+K01254+K01254+K05309+K18592+K00461+K15717+K16817+K16817+K16817+K16817+K11987+K11987+K11987+K16342+K00432+K00432+K00432+K01047+K04097+K00079+K18592+K16342+K16342+K14621+K00461+K00461+K00461+K00461+K00461+K00461+K00461+K00432+…
Organismal Systems	Sensory system	Phototransduction	69	ko04744	Cg00289;Cg00320;Cg01265;Cg01266;Cg06183;Cg06774;Cg06851;Cg13966;Cg14822;Cg17621;Cg17622;Cg20596;Cg20986;Cg21123;Cg21124;Cg21518;Cg21950;Cg22232;Cg22449;Cg22867;Cg22872;Cg22873;Cg22874;Cg22875;Cg24610;Cg25021;Cg25022;Cg27066;Cg27067;Cg27068;Cg27069;Cg27070;Cg27071;Cg27072;Cg27073;Cg27077;Cg27078;Cg27079;Cg27080;Cg27082;Cg27083;Cg27085;Cg27410;Cg28197;Cg28198;Cg28199;Cg28277;Cg28281;Cg28282;Cg28283…	K02183+K02183+K02183+K02183+K02183+K12322+K02183+K02183+K02183+K02183+K02183+K02183+K02183+K02183+K02183+K02183+K02183+K02183+K02183+K02183+K02183+K02183+K02183+K02183+K02183+K12322+K12322+K02183+K02183+K02183+K02183+K02183+K02183+K02183+K02183+K02183+K02183+K02183+K02183+K02183+K02183+K02183+K02183+K02183+K02183+K02183+K02183+K02183+K02183+K02183+K02183+K02183+K02183+K02183+K02183+K02183+K02183+…
Human Diseases	Cancers	Gastric cancer	68	ko05226	Cg01198;Cg01320;Cg02695;Cg03498;Cg04454;Cg05072;Cg05663;Cg05768;Cg05775;Cg05778;Cg06494;Cg06935;Cg07033;Cg07130;Cg09245;Cg09302;Cg09517;Cg11493;Cg11693;Cg11831;Cg12066;Cg12985;Cg13270;Cg13409;Cg13416;Cg13417;Cg14664;Cg14667;Cg15826;Cg16189;Cg16190;Cg16191;Cg16192;Cg16377;Cg16641;Cg16689;Cg16690;Cg16971;Cg16973;Cg17616;Cg17671;Cg18579;Cg19083;Cg19366;Cg19391;Cg19393;Cg19397;Cg20608;Cg20920;Cg22592…	K02085+K23605+K04501+K04371+K08957+K00408+K00922+K04688+K10140+K02649+K05658+K07203+K02353+K00922+K02354+K02842+K14021+K04365+K01558+K00572+K00182+K00444+K04674+K02432+K02432+K02432+K02375+K02375+K04361+K01064+K03209+K00445+K01357+K02105+K03068+K02649+K02649+K04402+K04402+K04364+K02157+K00714+K04491+K04377+K04402+K04402+K04402+K02159+K02206+K07827+K07827+K01384+K08957+K04368+K00444+K00444+K03511+…
Metabolism	Xenobiotics biodegradation and metabolism	Drug metabolism - other enzymes	67	ko00983	Cg03652;Cg03653;Cg04663;Cg04750;Cg04751;Cg04901;Cg04958;Cg04959;Cg05019;Cg05023;Cg05187;Cg05706;Cg05990;Cg07089;Cg08543;Cg08544;Cg09472;Cg09473;Cg09566;Cg09568;Cg09981;Cg09982;Cg10403;Cg11224;Cg11921;Cg11922;Cg12116;Cg12204;Cg12205;Cg12206;Cg13536;Cg13788;Cg14777;Cg15828;Cg15881;Cg15951;Cg16010;Cg17163;Cg17296;Cg17541;Cg17658;Cg18175;Cg18756;Cg18757;Cg19000;Cg19022;Cg19135;Cg19203;Cg19278;Cg19308…	K00799+K00799+K01489+K00799+K00799+K01951+K00569+K00569+K01489+K00857+K00799+K00799+K01431+K01195+K00799+K00799+K00799+K00799+K23790+K23790+K00758+K00758+K00088+K00799+K00106+K00106+K01520+K00799+K00799+K00799+K00799+K00940+K00799+K00757+K00757+K00876+K00876+K10808+K10808+K03927+K00857+K00207+K00569+K00569+K01519+K00857+K00876+K13800+K00569+K00569+K00799+K00799+K01464+K00799+K00799+K00757+K00106+…
Human Diseases	Infectious diseases	Bacterial invasion of epithelial cells	67	ko05100	Cg00428;Cg00569;Cg00571;Cg00572;Cg01777;Cg04208;Cg04318;Cg05025;Cg05663;Cg05778;Cg06987;Cg06988;Cg06990;Cg07130;Cg07956;Cg08992;Cg10418;Cg11137;Cg11201;Cg11202;Cg11203;Cg11204;Cg11205;Cg11206;Cg11207;Cg11208;Cg11209;Cg11210;Cg11211;Cg11212;Cg11213;Cg11214;Cg11215;Cg11216;Cg11217;Cg11220;Cg11510;Cg13656;Cg13681;Cg15280;Cg15786;Cg15787;Cg16377;Cg16689;Cg16690;Cg18238;Cg18252;Cg19085;Cg22383;Cg24609…	K23612+K23612+K23612+K23612+K23612+K05756+K04646+K04393+K00922+K02649+K04513+K04513+K04513+K00922+K23612+K12959+K23612+K05755+K12959+K12959+K12959+K12959+K12959+K12959+K06278+K06278+K06278+K06278+K06278+K12959+K12959+K12959+K12959+K12959+K12959+K06278+K05717+K01528+K05692+K05754+K04707+K04707+K02105+K02649+K02649+K05757+K04392+K05704+K04644+K04392+K05719+K04393+K23612+K04393+K12959+K12959+K04393+…
Environmental Information Processing	Signal transduction	MAPK signaling pathway	66	ko04010	Cg03498;Cg05025;Cg05043;Cg08553;Cg09481;Cg09739;Cg09756;Cg11493;Cg13241;Cg13270;Cg13703;Cg15519;Cg15522;Cg15826;Cg16971;Cg16973;Cg17505;Cg17506;Cg17507;Cg17616;Cg17918;Cg17970;Cg18224;Cg18231;Cg18232;Cg18252;Cg18426;Cg18444;Cg18445;Cg18484;Cg18698;Cg19366;Cg19391;Cg19393;Cg19397;Cg19540;Cg19600;Cg19770;Cg19904;Cg20195;Cg22409;Cg22592;Cg22688;Cg23508;Cg23509;Cg23521;Cg23522;Cg23851;Cg23852;Cg24609…	K04371+K04393+K04468+K07830+K04373+K04427+K04526+K04365+K03173+K04674+K04431+K16342+K03173+K04361+K04402+K04402+K03283+K03283+K03283+K04364+K03283+K04348+K02677+K04467+K04467+K04392+K04416+K04345+K04345+K04440+K04448+K04377+K04402+K04402+K04402+K03175+K02580+K04370+K04374+K03283+K03175+K07827+K07827+K04439+K04439+K04439+K04439+K16342+K16342+K04392+K04389+K04393+K04368+K02187+K02187+K06268+K04393+…
Human Diseases	Cancers	MicroRNAs in cancer	66	ko05206	Cg01198;Cg03498;Cg04146;Cg04147;Cg04148;Cg04218;Cg05561;Cg05663;Cg05723;Cg05724;Cg05725;Cg05778;Cg05860;Cg06494;Cg06935;Cg06987;Cg06988;Cg06990;Cg07130;Cg08923;Cg09517;Cg09611;Cg13096;Cg13508;Cg13740;Cg13746;Cg15512;Cg15517;Cg15518;Cg15826;Cg16177;Cg16689;Cg16690;Cg17011;Cg17616;Cg18151;Cg18224;Cg18504;Cg19034;Cg19366;Cg19600;Cg20128;Cg20129;Cg20513;Cg20758;Cg22090;Cg22592;Cg22688;Cg25908;Cg26330…	K02085+K04371+K05665+K05665+K05665+K05665+K06493+K00922+K01116+K01116+K01116+K02649+K05665+K05658+K07203+K04513+K04513+K04513+K00922+K06643+K14021+K10151+K00558+K02599+K04498+K04498+K11987+K11987+K11987+K04361+K05665+K02649+K02649+K07204+K04364+K06067+K02677+K11411+K01110+K04377+K02580+K16172+K16172+K05665+K01425+K04671+K07827+K07827+K04368+K02187+K02187+K12886+K18050+K06493+K05658+K05658+K06643+…
Metabolism	Amino acid metabolism	Lysine degradation	65	ko00310	Cg00710;Cg03459;Cg03460;Cg03461;Cg03468;Cg03469;Cg03470;Cg03471;Cg03472;Cg05865;Cg07581;Cg07647;Cg08698;Cg08701;Cg08702;Cg09125;Cg09831;Cg10226;Cg10311;Cg10417;Cg10551;Cg11072;Cg12641;Cg12642;Cg13528;Cg14323;Cg15300;Cg15570;Cg16882;Cg17215;Cg17352;Cg17639;Cg17903;Cg17949;Cg19460;Cg20386;Cg21790;Cg22168;Cg23771;Cg24854;Cg24894;Cg24895;Cg24898;Cg24899;Cg26033;Cg26034;Cg27025;Cg27274;Cg27711;Cg27791…	K11428+K20796+K20796+K20796+K20796+K20796+K20796+K20796+K20796+K11428+K20796+K20796+K00626+K00626+K00626+K00128+K00626+K11433+K14157+K09189+K11419+K00382+K00306+K00306+K09188+K11703+K20796+K11426+K07515+K00825+K00825+K11427+K00252+K07511+K00022+K09188+K11421+K11429+K18201+K00474+K18201+K18201+K18201+K18201+K00306+K00306+K14085+K06101+K00471+K00128+K00128+K00658+K15791+K18826+K00149+K11428+K11421+…
Organismal Systems	Aging	Longevity regulating pathway - worm	64	ko04212	Cg03652;Cg03653;Cg04750;Cg04751;Cg04873;Cg05078;Cg05187;Cg05309;Cg05663;Cg05706;Cg05768;Cg06469;Cg06692;Cg06935;Cg07130;Cg07734;Cg07735;Cg07863;Cg08543;Cg08544;Cg08990;Cg09263;Cg09472;Cg09473;Cg10025;Cg10026;Cg11224;Cg12204;Cg12205;Cg12206;Cg12475;Cg13536;Cg14777;Cg17019;Cg17020;Cg18484;Cg18504;Cg19034;Cg19519;Cg19904;Cg20128;Cg20129;Cg20311;Cg21555;Cg21717;Cg21718;Cg22035;Cg22904;Cg23118;Cg23119…	K00799+K00799+K00799+K00799+K08341+K10798+K00799+K08269+K00922+K00799+K04688+K08341+K10798+K07203+K00922+K10798+K10798+K09408+K00799+K00799+K18463+K04564+K00799+K00799+K03781+K03781+K00799+K00799+K00799+K00799+K18461+K00799+K00799+K00507+K00507+K04440+K11411+K01110+K00799+K04374+K16172+K16172+K00799+K13356+K00799+K00799+K13356+K11204+K12824+K12824+K04043+K00799+K00799+K24070+K04456+K04456+K04456+…
Cellular Processes	Cellular community - eukaryotes	Signaling pathways regulating pluripotency of stem cells	64	ko04550	Cg01198;Cg01320;Cg02695;Cg03498;Cg05072;Cg05663;Cg05778;Cg07033;Cg07130;Cg09245;Cg09302;Cg11693;Cg11831;Cg12066;Cg12985;Cg13202;Cg13409;Cg13416;Cg13417;Cg14482;Cg14664;Cg14667;Cg16189;Cg16190;Cg16191;Cg16192;Cg16377;Cg16689;Cg16690;Cg17616;Cg17671;Cg18024;Cg18223;Cg18579;Cg18743;Cg19366;Cg21558;Cg21691;Cg21692;Cg21693;Cg21694;Cg21790;Cg22090;Cg22592;Cg22688;Cg24725;Cg25908;Cg26409;Cg26472;Cg27772…	K02085+K23605+K04501+K04371+K00408+K00922+K02649+K02353+K00922+K02354+K02842+K01558+K00572+K00182+K00444+K04675+K02432+K02432+K02432+K16790+K02375+K02375+K01064+K03209+K00445+K01357+K02105+K02649+K02649+K04364+K02157+K17693+K13578+K00714+K04666+K04377+K04447+K04447+K04447+K04447+K04447+K11421+K04671+K07827+K07827+K01384+K04368+K00444+K00444+K04456+K04456+K04456+K04447+K22687+K11421+K11421+K02649+…
Organismal Systems	Immune system	NOD-like receptor signaling pathway	64	ko04621	Cg03498;Cg04873;Cg05650;Cg06469;Cg06855;Cg06987;Cg06988;Cg06990;Cg07344;Cg07346;Cg07352;Cg07358;Cg07363;Cg07365;Cg07368;Cg07641;Cg07898;Cg07899;Cg07900;Cg07910;Cg07911;Cg08212;Cg08935;Cg09085;Cg09233;Cg09336;Cg09535;Cg09739;Cg10720;Cg10724;Cg10730;Cg10736;Cg10739;Cg11144;Cg12265;Cg12266;Cg12848;Cg12849;Cg13241;Cg15522;Cg18231;Cg18232;Cg18484;Cg18698;Cg19540;Cg19600;Cg19649;Cg21470;Cg22409;Cg23952…	K04371+K08341+K06030+K08341+K08009+K04513+K04513+K04513+K16060+K16060+K16060+K16060+K16060+K16060+K16060+K16060+K16060+K16060+K16060+K16060+K16060+K16060+K10160+K16060+K21421+K16060+K08339+K04427+K05410+K05410+K05410+K05410+K05410+K03462+K05410+K05410+K05410+K05410+K03173+K03173+K04467+K04467+K04440+K04448+K03175+K02580+K08336+K01363+K03175+K11864+K17890+K04079+K05858+K05858+K04570+K04570+K04570+…
Environmental Information Processing	Signal transduction	AMPK signaling pathway	63	ko04152	Cg00286;Cg00317;Cg01251;Cg01253;Cg02438;Cg03744;Cg03745;Cg05663;Cg05768;Cg05778;Cg05858;Cg06190;Cg06935;Cg07130;Cg07863;Cg08641;Cg09584;Cg09739;Cg09756;Cg13053;Cg13065;Cg15579;Cg16257;Cg16689;Cg16690;Cg16839;Cg17011;Cg17019;Cg17020;Cg17066;Cg17684;Cg18495;Cg18504;Cg18551;Cg18961;Cg19588;Cg19716;Cg19756;Cg19962;Cg20068;Cg20113;Cg20128;Cg20129;Cg22283;Cg22446;Cg23369;Cg23987;Cg25206;Cg26686;Cg26844…	K07905+K07905+K07901+K07901+K08765+K01596+K01596+K00922+K04688+K02649+K00665+K04135+K07203+K00922+K09408+K08765+K01578+K04427+K04526+K03456+K03456+K07298+K07206+K02649+K02649+K07298+K07204+K00507+K00507+K07205+K00665+K00665+K11411+K07207+K07903+K06276+K07198+K04382+K07198+K00850+K00693+K16172+K16172+K08271+K07208+K11583+K04354+K04135+K11583+K07199+K00021+K03841+K11584+K04456+K04456+K04456+K08765+…
Metabolism	Amino acid metabolism	Cysteine and methionine metabolism	62	ko00270	Cg00288;Cg00319;Cg01018;Cg02988;Cg02991;Cg02993;Cg03021;Cg03097;Cg03099;Cg03850;Cg03954;Cg04389;Cg04728;Cg04746;Cg05180;Cg05225;Cg06763;Cg06764;Cg09428;Cg09430;Cg09503;Cg10449;Cg10929;Cg10931;Cg11291;Cg11294;Cg11298;Cg12119;Cg12120;Cg13096;Cg13349;Cg14338;Cg16600;Cg16616;Cg16793;Cg16794;Cg17993;Cg18963;Cg19223;Cg19547;Cg20228;Cg21112;Cg21113;Cg21283;Cg21308;Cg22279;Cg22904;Cg23628;Cg23709;Cg25053…	K00831+K00831+K00456+K00456+K00456+K00456+K00456+K00456+K00456+K01011+K00815+K00797+K00026+K00797+K00827+K01251+K17989+K17989+K00544+K00544+K01611+K01251+K00544+K00544+K00544+K00544+K00544+K00802+K00802+K00558+K00816+K00789+K11205+K01697+K00772+K00772+K01011+K08963+K01758+K00789+K00548+K00816+K00816+K08964+K00548+K00826+K11204+K14454+K05396+K00547+K01738+K00548+K00548+K00548+K01011+K00025+K09880+…
Metabolism	Global and overview maps	Fatty acid metabolism	62	ko01212	Cg02438;Cg03777;Cg04175;Cg04848;Cg04849;Cg05858;Cg06734;Cg07040;Cg08641;Cg08698;Cg08701;Cg08702;Cg09310;Cg09311;Cg09831;Cg10550;Cg12286;Cg15423;Cg15532;Cg15538;Cg15640;Cg15664;Cg16850;Cg16882;Cg16883;Cg17019;Cg17020;Cg17684;Cg17926;Cg17930;Cg17949;Cg17973;Cg18147;Cg18311;Cg18312;Cg18495;Cg19181;Cg19460;Cg19506;Cg19746;Cg20580;Cg21108;Cg21326;Cg21327;Cg21375;Cg21495;Cg21634;Cg21942;Cg22044;Cg24425…	K08765+K00232+K00248+K18660+K18660+K00665+K00645+K09458+K08765+K00626+K00626+K00626+K07512+K07512+K00626+K08766+K00232+K01074+K13370+K10226+K00249+K10226+K08764+K07515+K07509+K00507+K00507+K00665+K10249+K10249+K07511+K01897+K08764+K10249+K10249+K00665+K01897+K00022+K10203+K10250+K00232+K00232+K10249+K10249+K00255+K10251+K10251+K00232+K10703+K09478+K09478+K09479+K01897+K10703+K22540+K10249+K15013+…
Metabolism	Amino acid metabolism	Arginine and proline metabolism	59	ko00330	Cg04261;Cg04389;Cg04746;Cg05643;Cg06093;Cg06094;Cg07044;Cg07538;Cg07539;Cg09125;Cg09503;Cg09549;Cg10211;Cg10212;Cg12119;Cg12120;Cg12674;Cg13475;Cg14457;Cg16099;Cg16721;Cg18060;Cg18249;Cg18453;Cg20050;Cg20051;Cg21951;Cg21952;Cg22560;Cg22562;Cg22602;Cg22603;Cg22604;Cg22651;Cg22653;Cg22698;Cg22699;Cg23216;Cg23628;Cg23652;Cg24032;Cg24133;Cg24607;Cg24810;Cg25064;Cg25725;Cg27025;Cg27227;Cg27509;Cg27791…	K13240+K00797+K00797+K00294+K11394+K11394+K11394+K00934+K00934+K00128+K01611+K00472+K01426+K01426+K00802+K00802+K00273+K00472+K00472+K00472+K00273+K00472+K00274+K01581+K00286+K00286+K12259+K12259+K00472+K00472+K08660+K08660+K08660+K00472+K00472+K08660+K08660+K12259+K14454+K11142+K00657+K00819+K00274+K12259+K12657+K11182+K14085+K11182+K00274+K00128+K00128+K11182+K01476+K00149+K01259+K11182+K11182+…
Human Diseases	Infectious diseases	Influenza A	59	ko05164	Cg00286;Cg00317;Cg01503;Cg02037;Cg03498;Cg05106;Cg05663;Cg05778;Cg07130;Cg08935;Cg09517;Cg10720;Cg10724;Cg10730;Cg10736;Cg10739;Cg12265;Cg12266;Cg12848;Cg12849;Cg13681;Cg13740;Cg13746;Cg13782;Cg16689;Cg16690;Cg16846;Cg18224;Cg18231;Cg18232;Cg18591;Cg19061;Cg19600;Cg20252;Cg20608;Cg21558;Cg21691;Cg21692;Cg21693;Cg21694;Cg24552;Cg24942;Cg25025;Cg25908;Cg26330;Cg26332;Cg26708;Cg27772;Cg28001;Cg28003…	K07905+K07905+K07904+K07904+K04371+K14396+K00922+K02649+K00922+K10160+K14021+K05410+K05410+K05410+K05410+K05410+K05410+K05410+K05410+K05410+K05692+K04498+K04498+K14297+K02649+K02649+K03237+K02677+K04467+K04467+K14298+K14404+K02580+K07904+K02159+K04447+K04447+K04447+K04447+K04447+K04721+K04389+K04721+K04368+K02187+K02187+K14290+K04456+K04456+K04456+K14284+K04447+K02649+K02649+K10160+K10160+K02649+…
Organismal Systems	Immune system	Chemokine signaling pathway	56	ko04062	Cg03498;Cg04628;Cg05025;Cg05663;Cg05778;Cg06788;Cg06842;Cg06987;Cg06988;Cg06990;Cg07130;Cg07863;Cg11493;Cg13748;Cg16689;Cg16690;Cg17616;Cg18231;Cg18232;Cg18252;Cg18444;Cg18445;Cg19085;Cg19600;Cg21558;Cg21691;Cg21692;Cg21693;Cg21694;Cg22592;Cg22688;Cg23508;Cg23509;Cg23521;Cg23522;Cg24355;Cg24609;Cg25834;Cg25908;Cg26811;Cg27201;Cg27311;Cg27772;Cg28001;Cg28003;Cg28522;Cg28655;Cg28657;Cg28688;Cg29094…	K04371+K08042+K04393+K00922+K02649+K00910+K00910+K04513+K04513+K04513+K00922+K09408+K04365+K08049+K02649+K02649+K04364+K04467+K04467+K04392+K04345+K04345+K05704+K02580+K04447+K04447+K04447+K04447+K04447+K07827+K07827+K04439+K04439+K04439+K04439+K08291+K04392+K04393+K04368+K05858+K04393+K05858+K04456+K04456+K04456+K04393+K04393+K04392+K04393+K08041+K08045+K04447+K04237+K02649+K02649+K02649
Cellular Processes	Transport and catabolism	Mitophagy - animal	56	ko04137	Cg02714;Cg04058;Cg04167;Cg04873;Cg05650;Cg06151;Cg06270;Cg06469;Cg07863;Cg07997;Cg08553;Cg08582;Cg09535;Cg10056;Cg10720;Cg10724;Cg10730;Cg10736;Cg10739;Cg11140;Cg12265;Cg12266;Cg12731;Cg12732;Cg12756;Cg12757;Cg12848;Cg12849;Cg12877;Cg13490;Cg13708;Cg15130;Cg16291;Cg18484;Cg18698;Cg19085;Cg19631;Cg19904;Cg20924;Cg22592;Cg22688;Cg23023;Cg23084;Cg23253;Cg24648;Cg25347;Cg27649;Cg27650;Cg29192;Cg29193…	K20168+K15637+K11851+K08341+K06030+K03097+K05688+K08341+K09408+K15485+K07830+K20168+K08339+K04556+K05410+K05410+K05410+K05410+K05410+K21343+K05410+K05410+K09455+K09455+K09455+K09455+K05410+K05410+K19946+K17987+K08334+K14381+K03115+K04440+K04448+K05704+K07870+K04374+K21347+K07827+K07827+K21347+K17969+K17986+K03097+K15464+K04570+K04570+K04570+K04570+K04570+K17907+K17907+K07831+K21347+K17907
Organismal Systems	Nervous system	Serotonergic synapse	56	ko04726	Cg03498;Cg05137;Cg05268;Cg07093;Cg08888;Cg08998;Cg10028;Cg11493;Cg13511;Cg14072;Cg14520;Cg15512;Cg15517;Cg15518;Cg15519;Cg18224;Cg18249;Cg18444;Cg18445;Cg21623;Cg21894;Cg22592;Cg22688;Cg23316;Cg23851;Cg23852;Cg24021;Cg24404;Cg24436;Cg24438;Cg24492;Cg24493;Cg24607;Cg25908;Cg26094;Cg26095;Cg26330;Cg26332;Cg26624;Cg26625;Cg26626;Cg26628;Cg26629;Cg26811;Cg27311;Cg27509;Cg29252;Cg29306;Cg29544;Cg29548…	K04371+K04163+K04162+K04153+K08022+K04160+K00502+K04365+K05181+K00461+K01593+K11987+K11987+K11987+K16342+K02677+K00274+K04345+K04345+K04157+K01593+K07827+K07827+K04160+K16342+K16342+K04163+K04153+K04160+K04160+K04160+K04160+K00274+K04368+K00461+K00461+K02187+K02187+K00461+K00461+K00461+K00461+K00461+K05858+K05858+K00274+K08045+K04153+K00461+K00461+K00461+K00461+K04153+K08022+K11987+K11987
Human Diseases	Cancers	Choline metabolism in cancer	56	ko05231	Cg01139;Cg03498;Cg05663;Cg05723;Cg05724;Cg05725;Cg05768;Cg05778;Cg06935;Cg07130;Cg09100;Cg09104;Cg09475;Cg15519;Cg15826;Cg16257;Cg16607;Cg16689;Cg16690;Cg17066;Cg17616;Cg18224;Cg18252;Cg18303;Cg18342;Cg18484;Cg18551;Cg18698;Cg19334;Cg19588;Cg20310;Cg20359;Cg21026;Cg21455;Cg21859;Cg22446;Cg22592;Cg22688;Cg23477;Cg23851;Cg23852;Cg24609;Cg25908;Cg27772;Cg28001;Cg28003;Cg28357;Cg28358;Cg28657;novel.2…	K00889+K04371+K00922+K01116+K01116+K01116+K04688+K02649+K07203+K00922+K00901+K00901+K01115+K16342+K04361+K07206+K18695+K02649+K02649+K07205+K04364+K02677+K04392+K01080+K00901+K04440+K07207+K04448+K01080+K06276+K01080+K00901+K01080+K00901+K14156+K07208+K07827+K07827+K00901+K16342+K16342+K04392+K04368+K04456+K04456+K04456+K01080+K01080+K04392+K02649+K02649+K02649+K04361+K00968+K00968+K00968
Environmental Information Processing	Membrane transport	ABC transporters	55	ko02010	Cg04146;Cg04147;Cg04148;Cg04218;Cg05860;Cg06494;Cg09988;Cg10979;Cg11171;Cg11337;Cg11338;Cg13295;Cg13296;Cg13297;Cg13298;Cg13299;Cg13300;Cg13301;Cg13305;Cg13307;Cg13308;Cg13310;Cg13314;Cg13315;Cg13316;Cg13652;Cg14106;Cg16177;Cg16416;Cg17174;Cg17304;Cg17306;Cg17777;Cg17802;Cg19005;Cg19718;Cg19929;Cg19961;Cg20513;Cg20585;Cg22228;Cg23925;Cg24235;Cg25973;Cg27895;Cg28632;Cg28633;Cg28957;Cg29348;Cg29349…	K05665+K05665+K05665+K05665+K05665+K05658+K05662+K05643+K05676+K05643+K05643+K05673+K05673+K05673+K05673+K05673+K05673+K05673+K05673+K05673+K05673+K05673+K05673+K05673+K05673+K05661+K05668+K05665+K05679+K05641+K05641+K05641+K05648+K05643+K05641+K05677+K05681+K05677+K05665+K05655+K05643+K05668+K05673+K05657+K05674+K05683+K05684+K05678+K05658+K05658+K05661+K05665+K05673+K05665+K05643
Environmental Information Processing	Signaling molecules and interaction	ECM-receptor interaction	55	ko04512	Cg03902;Cg03942;Cg05561;Cg06280;Cg09929;Cg10587;Cg10589;Cg10660;Cg10662;Cg10664;Cg10665;Cg10666;Cg10669;Cg10672;Cg10673;Cg10676;Cg10679;Cg11510;Cg11698;Cg12458;Cg14014;Cg14642;Cg14784;Cg15644;Cg16064;Cg16337;Cg16358;Cg16359;Cg16363;Cg16412;Cg16833;Cg17568;Cg19104;Cg19321;Cg19372;Cg19433;Cg21619;Cg21621;Cg23358;Cg24389;Cg24912;Cg26349;Cg28293;Cg28294;Cg28324;Cg29149;Cg29483;Cg29623;Cg29819;Cg30044…	K06238+K06238+K06493+K06238+K06258+K06249+K06249+K05636+K05636+K05636+K05636+K05636+K05636+K05636+K05636+K05636+K05636+K05717+K06265+K06265+K06238+K06238+K05635+K06238+K23380+K06238+K06238+K06238+K06238+K06267+K06240+K06238+K23379+K05637+K08131+K23380+K19719+K06236+K04659+K06237+K05719+K04659+K06238+K06238+K06238+K06493+K06483+K06584+K06485+K06585+K06585+K05719+K05719+K06584+K06249
Organismal Systems	Endocrine system	Growth hormone synthesis, secretion and action	55	ko04935	Cg03498;Cg03599;Cg04628;Cg05663;Cg05723;Cg05724;Cg05725;Cg05778;Cg06264;Cg06935;Cg07130;Cg10602;Cg13378;Cg13379;Cg13380;Cg13740;Cg13746;Cg13748;Cg16689;Cg16690;Cg17616;Cg18224;Cg18426;Cg18444;Cg18445;Cg18484;Cg19904;Cg20128;Cg20129;Cg21558;Cg21691;Cg21692;Cg21693;Cg21694;Cg22229;Cg22339;Cg22592;Cg22688;Cg22786;Cg22838;Cg25908;Cg26811;Cg27311;Cg27772;Cg28001;Cg28003;Cg28430;Cg28832;Cg29094;Cg29252…	K04371+K04218+K08042+K00922+K01116+K01116+K01116+K02649+K04284+K07203+K00922+K04284+K04284+K04284+K04284+K04498+K04498+K08049+K02649+K02649+K04364+K02677+K04416+K04345+K04345+K04440+K04374+K16172+K16172+K04447+K04447+K04447+K04447+K04447+K04218+K04284+K07827+K07827+K04284+K04284+K04368+K05858+K05858+K04456+K04456+K04456+K04284+K04284+K08041+K08045+K04447+K02649+K02649+K02649+K04221
Human Diseases	Cancers	Chemical carcinogenesis	55	ko05204	Cg02817;Cg03652;Cg03653;Cg04423;Cg04464;Cg04465;Cg04466;Cg04469;Cg04470;Cg04689;Cg04708;Cg04750;Cg04751;Cg05187;Cg05706;Cg06006;Cg08543;Cg08544;Cg09472;Cg09473;Cg09566;Cg09568;Cg11102;Cg11224;Cg11326;Cg11331;Cg11332;Cg11333;Cg11334;Cg11335;Cg11336;Cg12204;Cg12205;Cg12206;Cg13349;Cg13536;Cg14777;Cg15512;Cg15517;Cg15518;Cg19519;Cg20311;Cg21078;Cg21112;Cg21113;Cg21717;Cg21718;Cg22153;Cg24135;Cg25101…	K15680+K00799+K00799+K04809+K00079+K00079+K00079+K00079+K00079+K04097+K04097+K00799+K00799+K00799+K00799+K13299+K00799+K00799+K00799+K00799+K23790+K23790+K04097+K00799+K04097+K04097+K04097+K04097+K04097+K04097+K04097+K00799+K00799+K00799+K00816+K00799+K00799+K11987+K11987+K11987+K00799+K00799+K04097+K00816+K00816+K00799+K00799+K00079+K00799+K00799+K11822+K11822+K11987+K11987+K00799
Organismal Systems	Immune system	Platelet activation	54	ko04611	Cg03492;Cg03498;Cg04031;Cg04628;Cg04681;Cg05531;Cg05561;Cg05663;Cg05778;Cg06987;Cg06988;Cg06990;Cg07130;Cg12326;Cg13681;Cg13748;Cg13808;Cg13809;Cg15519;Cg16689;Cg16690;Cg17182;Cg18444;Cg18445;Cg19085;Cg19497;Cg19939;Cg19941;Cg19945;Cg21621;Cg23851;Cg23852;Cg24912;Cg25043;Cg26811;Cg27311;Cg27758;Cg27760;Cg27762;Cg27764;Cg27765;Cg27772;Cg27991;Cg28001;Cg28003;Cg28844;Cg29094;Cg29149;Cg29252;Cg30237…	K04263+K04371+K12319+K08042+K06069+K06269+K06493+K00922+K02649+K04513+K04513+K04513+K00922+K01313+K05692+K08049+K12318+K12319+K16342+K02649+K02649+K04264+K04345+K04345+K05704+K06269+K04264+K04264+K04263+K06236+K16342+K16342+K05719+K12319+K05858+K05858+K06269+K06269+K06269+K06269+K06269+K04456+K06269+K04456+K04456+K06269+K08041+K06493+K08045+K05719+K05719+K02649+K02649+K02649
Human Diseases	Cancers	Pancreatic cancer	54	ko05212	Cg01320;Cg02695;Cg03498;Cg05025;Cg05663;Cg05768;Cg05775;Cg05778;Cg06935;Cg07130;Cg09475;Cg09517;Cg11493;Cg13270;Cg15826;Cg16689;Cg16690;Cg16971;Cg16973;Cg18231;Cg18232;Cg18252;Cg18484;Cg19391;Cg19393;Cg19397;Cg19600;Cg20608;Cg22592;Cg22688;Cg24609;Cg25834;Cg25908;Cg26771;Cg27020;Cg27021;Cg27098;Cg27201;Cg27649;Cg27650;Cg27772;Cg28001;Cg28003;Cg28522;Cg28655;Cg28657;Cg28688;Cg29192;Cg29193;Cg29286…	K23605+K04501+K04371+K04393+K00922+K04688+K10140+K02649+K07203+K00922+K01115+K14021+K04365+K04674+K04361+K02649+K02649+K04402+K04402+K04467+K04467+K04392+K04440+K04402+K04402+K04402+K02580+K02159+K07827+K07827+K04392+K04393+K04368+K03511+K08775+K08775+K04482+K04393+K04570+K04570+K04456+K04456+K04456+K04393+K04393+K04392+K04393+K04570+K04570+K04570+K02649+K02649+K02649+K04361
Metabolism	Nucleotide metabolism	Pyrimidine metabolism	53	ko00240	Cg00581;Cg03532;Cg04663;Cg05019;Cg05023;Cg05942;Cg05990;Cg06792;Cg06837;Cg07023;Cg07882;Cg07936;Cg09124;Cg09169;Cg09171;Cg09620;Cg09868;Cg09981;Cg09982;Cg09989;Cg12116;Cg13788;Cg15828;Cg15881;Cg15951;Cg16010;Cg16524;Cg17163;Cg17296;Cg17658;Cg18175;Cg18682;Cg19022;Cg19135;Cg19203;Cg19486;Cg20689;Cg21854;Cg22555;Cg22646;Cg22719;Cg23263;Cg23389;Cg23393;Cg23629;Cg24477;Cg24518;Cg24739;Cg25544;Cg26872…	K12305+K16904+K01489+K01489+K00857+K01081+K01431+K11540+K11540+K01518+K19970+K19970+K01937+K19970+K19970+K00560+K18533+K00758+K00758+K00761+K01520+K00940+K00757+K00757+K00876+K00876+K01493+K10808+K10808+K00857+K00207+K12304+K00857+K00876+K13800+K01081+K01464+K00757+K13421+K13421+K16330+K01510+K01081+K12305+K03783+K01081+K01081+K00943+K00940+K01511+K13809+K16904+K00207
Metabolism	Carbohydrate metabolism	Inositol phosphate metabolism	53	ko00562	Cg01139;Cg03886;Cg03927;Cg04779;Cg05626;Cg05663;Cg05723;Cg05724;Cg05725;Cg05774;Cg06441;Cg06445;Cg06569;Cg07130;Cg07242;Cg08453;Cg11105;Cg11380;Cg11385;Cg13149;Cg13429;Cg13455;Cg14145;Cg16629;Cg17605;Cg18946;Cg19034;Cg19921;Cg20358;Cg21274;Cg21408;Cg21409;Cg21672;Cg22300;Cg23120;Cg23924;Cg24143;Cg24144;Cg24147;Cg24191;Cg24645;Cg24766;Cg24831;Cg26811;Cg27103;Cg27311;Cg27770;Cg27999;Cg28406;Cg28687…	K00889+K00888+K00888+K01858+K18082+K00922+K01116+K01116+K01116+K01803+K00010+K00010+K21797+K00922+K01092+K22913+K18086+K10572+K10572+K18081+K00469+K20278+K00911+K18083+K00915+K15759+K01110+K03103+K19801+K05857+K00921+K00921+K00923+K20279+K13711+K00010+K21798+K21798+K21798+K00010+K05860+K01106+K15909+K05858+K01107+K05858+K00911+K00911+K00914+K00913+K01107+K00920+K13712
Organismal Systems	Nervous system	Retrograde endocannabinoid signaling	53	ko04723	Cg03498;Cg04042;Cg04628;Cg05514;Cg06240;Cg06847;Cg09291;Cg10582;Cg10584;Cg12039;Cg12068;Cg13268;Cg13509;Cg13511;Cg13748;Cg14029;Cg14244;Cg14919;Cg14946;Cg15512;Cg15517;Cg15518;Cg15817;Cg18108;Cg18224;Cg18251;Cg18444;Cg18445;Cg18484;Cg18659;Cg19029;Cg19745;Cg19888;Cg21184;Cg21325;Cg22842;Cg22896;Cg25593;Cg26241;Cg26811;Cg27255;Cg27311;Cg28426;Cg28901;Cg29094;Cg29252;Cg29978;Cg30451;Cg30470;novel.1…	K04371+K03943+K08042+K03961+K03941+K03936+K03964+K01054+K01054+K11351+K11352+K05185+K05175+K05181+K08049+K03935+K05175+K03949+K05186+K11987+K11987+K11987+K03959+K03950+K02677+K03955+K04345+K04345+K04440+K03951+K03939+K03963+K03966+K03948+K03953+K03942+K03944+K03962+K03937+K05858+K03940+K05858+K11353+K01054+K08041+K08045+K03954+K03934+K03934+K03961+K11987+K11987+K03948
Human Diseases	Endocrine and metabolic diseases	AGE-RAGE signaling pathway in diabetic complications	53	ko04933	Cg01320;Cg02695;Cg03498;Cg05025;Cg05663;Cg05723;Cg05724;Cg05725;Cg05778;Cg07130;Cg09233;Cg11510;Cg13270;Cg14329;Cg16689;Cg16690;Cg18224;Cg18252;Cg18484;Cg18698;Cg19600;Cg20608;Cg21274;Cg21558;Cg21621;Cg21691;Cg21692;Cg21693;Cg21694;Cg22592;Cg22688;Cg24389;Cg24609;Cg24627;Cg24645;Cg25834;Cg26330;Cg26332;Cg26525;Cg26811;Cg27201;Cg27311;Cg27772;Cg28001;Cg28003;Cg28522;Cg28655;Cg28657;Cg28688;Cg29310…	K23605+K04501+K04371+K04393+K00922+K01116+K01116+K01116+K02649+K00922+K21421+K05717+K04674+K05740+K02649+K02649+K02677+K04392+K04440+K04448+K02580+K02159+K05857+K04447+K06236+K04447+K04447+K04447+K04447+K07827+K07827+K06237+K04392+K09203+K05860+K04393+K02187+K02187+K18050+K05858+K04393+K05858+K04456+K04456+K04456+K04393+K04393+K04392+K04393+K04447+K02649+K02649+K02649
Metabolism	Amino acid metabolism	Glycine, serine and threonine metabolism	52	ko00260	Cg00288;Cg00319;Cg04510;Cg04512;Cg05125;Cg05126;Cg05127;Cg05180;Cg05945;Cg06098;Cg06457;Cg06763;Cg06764;Cg09428;Cg09430;Cg10680;Cg10929;Cg10931;Cg11072;Cg11291;Cg11294;Cg11298;Cg11911;Cg11912;Cg12192;Cg12641;Cg12642;Cg12674;Cg12796;Cg13230;Cg15324;Cg15735;Cg16616;Cg16721;Cg17608;Cg18249;Cg18270;Cg18433;Cg18436;Cg18437;Cg19223;Cg19509;Cg20718;Cg22337;Cg24607;Cg25470;Cg26033;Cg26034;Cg27025;Cg27509…	K00831+K00831+K12235+K12235+K00049+K00049+K00049+K00827+K00108+K02437+K00830+K17989+K17989+K00544+K00544+K00643+K00544+K00544+K00382+K00544+K00544+K00544+K11529+K11529+K00605+K00306+K00306+K00273+K01079+K00276+K00049+K00049+K01697+K00273+K01620+K00274+K00281+K01754+K15789+K15789+K01758+K00600+K00600+K00639+K00274+K01834+K00306+K00306+K14085+K00274+K00058+K01758
Metabolism	Lipid metabolism	Glycerolipid metabolism	52	ko00561	Cg06407;Cg06454;Cg08117;Cg09100;Cg09104;Cg09125;Cg09538;Cg09539;Cg09540;Cg09541;Cg10582;Cg10584;Cg11911;Cg11912;Cg13639;Cg14047;Cg15205;Cg15206;Cg15484;Cg15727;Cg18303;Cg18342;Cg18410;Cg18411;Cg18412;Cg18549;Cg18957;Cg19334;Cg20305;Cg20310;Cg20359;Cg21026;Cg21455;Cg23002;Cg23477;Cg23542;Cg24202;Cg24203;Cg24599;Cg25164;Cg27025;Cg27791;Cg28024;Cg28153;Cg28357;Cg28358;Cg28710;Cg28901;Cg29989;Cg30021…	K11155+K14074+K13523+K00901+K00901+K00128+K14073+K14073+K14073+K14073+K01054+K01054+K11529+K11529+K00864+K13509+K00864+K00864+K13509+K09881+K01080+K00901+K14075+K14075+K14075+K14075+K19007+K01080+K15728+K01080+K00901+K01080+K00901+K13517+K00901+K13506+K14073+K14073+K00629+K18693+K14085+K00128+K00128+K00863+K01080+K01080+K13513+K01054+K00149+K14074+K13509+K13509
Metabolism	Lipid metabolism	Sphingolipid metabolism	52	ko00600	Cg03488;Cg04554;Cg04555;Cg04994;Cg05989;Cg06168;Cg06665;Cg06728;Cg09159;Cg13988;Cg15145;Cg17248;Cg17249;Cg17443;Cg17444;Cg18303;Cg18482;Cg18979;Cg19229;Cg19247;Cg19334;Cg20206;Cg20310;Cg21001;Cg21026;Cg23587;Cg25671;Cg26060;Cg26926;Cg27224;Cg27433;Cg27695;Cg27696;Cg27812;Cg27815;Cg27816;Cg27828;Cg27829;Cg28041;Cg28042;Cg28043;Cg28054;Cg28055;Cg28357;Cg28358;Cg29158;Cg30181;Cg30222;Cg30538;novel.5…	K12350+K04715+K04715+K04715+K00720+K12352+K04708+K04715+K00654+K12351+K12348+K04718+K04718+K04718+K04718+K01080+K01634+K12349+K00654+K00654+K01080+K01634+K01080+K01201+K01080+K01202+K04712+K17108+K01201+K01201+K04716+K01019+K01019+K04715+K04715+K04715+K00654+K00654+K04715+K04715+K04715+K00654+K00654+K01080+K01080+K23727+K23727+K23727+K04716+K01202+K01202+K01202
Environmental Information Processing	Signal transduction	NF-kappa B signaling pathway	52	ko04064	Cg05723;Cg05724;Cg05725;Cg06151;Cg07344;Cg07346;Cg07352;Cg07358;Cg07363;Cg07365;Cg07368;Cg07641;Cg07898;Cg07899;Cg07900;Cg07910;Cg07911;Cg08212;Cg08935;Cg09085;Cg09336;Cg09739;Cg13241;Cg15512;Cg15517;Cg15518;Cg15522;Cg16291;Cg16971;Cg16973;Cg18231;Cg18232;Cg19391;Cg19393;Cg19397;Cg19540;Cg19600;Cg22409;Cg24648;Cg26905;Cg27649;Cg27650;Cg29192;Cg29193;Cg29286;novel.2025;novel.2070;novel.2071;novel.…	K01116+K01116+K01116+K03097+K16060+K16060+K16060+K16060+K16060+K16060+K16060+K16060+K16060+K16060+K16060+K16060+K16060+K16060+K10160+K16060+K16060+K04427+K03173+K11987+K11987+K11987+K03173+K03115+K04402+K04402+K04467+K04467+K04402+K04402+K04402+K03175+K02580+K03175+K03097+K24070+K04570+K04570+K04570+K04570+K04570+K16060+K16060+K16060+K10160+K10160+K11987+K11987
Environmental Information Processing	Signal transduction	HIF-1 signaling pathway	52	ko04066	Cg03498;Cg04669;Cg04748;Cg05663;Cg05723;Cg05724;Cg05725;Cg05768;Cg05778;Cg06935;Cg07130;Cg08189;Cg08935;Cg09233;Cg09756;Cg11903;Cg13740;Cg13746;Cg14776;Cg15715;Cg15826;Cg16689;Cg16690;Cg17066;Cg17154;Cg17288;Cg17964;Cg18224;Cg18875;Cg19600;Cg20068;Cg22586;Cg22679;Cg24044;Cg24445;Cg24560;Cg24577;Cg25468;Cg25908;Cg27688;Cg27772;Cg28001;Cg28003;Cg29665;Cg29837;novel.2029;novel.2109;novel.2172;novel.…	K04371+K01689+K01623+K00922+K01116+K01116+K01116+K04688+K02649+K07203+K00922+K00161+K10160+K21421+K04526+K00162+K04498+K04498+K00927+K03868+K04361+K02649+K02649+K07205+K03872+K03872+K04515+K02677+K03259+K02580+K00850+K00134+K00134+K01689+K00844+K00844+K00844+K03259+K04368+K02991+K04456+K04456+K04456+K03870+K03870+K02649+K02649+K10160+K10160+K02649+K04361+K00844
Organismal Systems	Development	Osteoclast differentiation	52	ko04380	Cg03498;Cg05561;Cg05663;Cg05778;Cg06855;Cg07130;Cg09739;Cg12731;Cg12732;Cg12756;Cg12757;Cg13241;Cg13270;Cg13703;Cg15130;Cg15522;Cg16689;Cg16690;Cg16881;Cg17616;Cg17970;Cg18231;Cg18232;Cg18252;Cg18484;Cg18698;Cg19540;Cg19600;Cg22409;Cg24609;Cg25908;Cg27196;Cg27772;Cg28001;Cg28003;Cg28657;Cg29149;Cg29203;Cg29259;Cg29614;Cg30184;Cg30186;Cg30204;Cg30218;Cg30219;Cg30234;Cg30247;Cg30281;Cg30385;novel.2…	K04371+K06493+K00922+K02649+K08009+K00922+K04427+K09455+K09455+K09455+K09455+K03173+K04674+K04431+K14381+K03173+K02649+K02649+K14379+K04364+K04348+K04467+K04467+K04392+K04440+K04448+K03175+K02580+K03175+K04392+K04368+K06268+K04456+K04456+K04456+K04392+K06493+K04576+K04576+K04576+K04576+K04576+K04576+K04576+K04576+K04576+K04576+K04576+K04576+K02649+K02649+K02649
Organismal Systems	Immune system	Fc gamma R-mediated phagocytosis	52	ko04666	Cg01139;Cg03498;Cg04208;Cg05025;Cg05663;Cg05723;Cg05724;Cg05725;Cg05768;Cg05778;Cg07130;Cg09475;Cg11137;Cg15280;Cg15519;Cg16689;Cg16690;Cg17248;Cg17249;Cg17443;Cg17444;Cg18224;Cg18238;Cg18252;Cg18303;Cg19334;Cg20310;Cg21026;Cg21695;Cg22003;Cg22402;Cg23851;Cg23852;Cg24609;Cg24831;Cg25834;Cg25908;Cg26525;Cg27201;Cg27772;Cg28001;Cg28003;Cg28357;Cg28358;Cg28522;Cg28655;Cg28657;Cg28688;Cg30370;novel.2…	K00889+K04371+K05756+K04393+K00922+K01116+K01116+K01116+K04688+K02649+K00922+K01115+K05755+K05754+K16342+K02649+K02649+K04718+K04718+K04718+K04718+K02677+K05757+K04392+K01080+K01080+K01080+K01080+K12562+K12488+K07941+K16342+K16342+K04392+K15909+K04393+K04368+K18050+K04393+K04456+K04456+K04456+K01080+K01080+K04393+K04393+K04392+K04393+K05758+K02649+K02649+K02649
Environmental Information Processing	Signal transduction	TNF signaling pathway	51	ko04668	Cg03498;Cg04058;Cg05663;Cg05778;Cg07130;Cg07344;Cg07346;Cg07352;Cg07358;Cg07363;Cg07365;Cg07368;Cg07641;Cg07898;Cg07899;Cg07900;Cg07910;Cg07911;Cg08212;Cg09085;Cg09336;Cg09739;Cg13241;Cg13703;Cg15512;Cg15517;Cg15518;Cg15522;Cg16689;Cg16690;Cg18231;Cg18232;Cg18484;Cg18698;Cg19600;Cg19904;Cg25908;Cg26330;Cg26332;Cg27772;Cg28001;Cg28003;Cg28200;novel.2025;novel.2029;novel.2070;novel.2071;novel.2109;…	K04371+K15637+K00922+K02649+K00922+K16060+K16060+K16060+K16060+K16060+K16060+K16060+K16060+K16060+K16060+K16060+K16060+K16060+K16060+K16060+K16060+K04427+K03173+K04431+K11987+K11987+K11987+K03173+K02649+K02649+K04467+K04467+K04440+K04448+K02580+K04374+K04368+K02187+K02187+K04456+K04456+K04456+K06052+K16060+K02649+K16060+K16060+K02649+K02649+K11987+K11987
Human Diseases	Infectious diseases	Hepatitis C	51	ko05160	Cg03498;Cg04643;Cg05663;Cg05778;Cg06472;Cg07130;Cg09517;Cg10720;Cg10724;Cg10730;Cg10736;Cg10739;Cg11493;Cg12265;Cg12266;Cg12848;Cg12849;Cg13053;Cg13065;Cg13241;Cg15522;Cg15826;Cg16377;Cg16689;Cg16690;Cg16846;Cg17616;Cg18231;Cg18232;Cg18955;Cg19366;Cg19540;Cg19600;Cg19756;Cg20608;Cg20920;Cg22409;Cg22592;Cg22688;Cg23987;Cg24942;Cg25908;Cg26330;Cg26332;Cg27772;Cg28001;Cg28003;novel.2029;novel.2109;n…	K04371+K16194+K00922+K02649+K13885+K00922+K14021+K05410+K05410+K05410+K05410+K05410+K04365+K05410+K05410+K05410+K05410+K03456+K03456+K03173+K03173+K04361+K02105+K02649+K02649+K03237+K04364+K04467+K04467+K03250+K04377+K03175+K02580+K04382+K02159+K02206+K03175+K07827+K07827+K04354+K04389+K04368+K02187+K02187+K04456+K04456+K04456+K02649+K02649+K02649+K04361
Human Diseases	Cancers	Colorectal cancer	51	ko05210	Cg01198;Cg01320;Cg02695;Cg03498;Cg05663;Cg05768;Cg05775;Cg05778;Cg06935;Cg06987;Cg06988;Cg06990;Cg07130;Cg09517;Cg11493;Cg13270;Cg15826;Cg16377;Cg16689;Cg16690;Cg16971;Cg16973;Cg17616;Cg17671;Cg18252;Cg18484;Cg18698;Cg19083;Cg19366;Cg19391;Cg19393;Cg19397;Cg20608;Cg21333;Cg22592;Cg22688;Cg24609;Cg25908;Cg26330;Cg26332;Cg26771;Cg27772;Cg27850;Cg28001;Cg28003;Cg28657;Cg29244;novel.2029;novel.2109;n…	K02085+K23605+K04501+K04371+K00922+K04688+K10140+K02649+K07203+K04513+K04513+K04513+K00922+K14021+K04365+K04674+K04361+K02105+K02649+K02649+K04402+K04402+K04364+K02157+K04392+K04440+K04448+K04491+K04377+K04402+K04402+K04402+K02159+K08737+K07827+K07827+K04392+K04368+K02187+K02187+K03511+K04456+K08736+K04456+K04456+K04392+K08734+K02649+K02649+K02649+K04361
Human Diseases	Cancer: overview	PD-L1 expression and PD-1 checkpoint pathway in cancer	51	ko05235	Cg03498;Cg05663;Cg05723;Cg05724;Cg05725;Cg05768;Cg05778;Cg06151;Cg06935;Cg07130;Cg08933;Cg08935;Cg08940;Cg08944;Cg15826;Cg16291;Cg16689;Cg16690;Cg17970;Cg18231;Cg18232;Cg18698;Cg19034;Cg19540;Cg19600;Cg21558;Cg21691;Cg21692;Cg21693;Cg21694;Cg22409;Cg22592;Cg22688;Cg24648;Cg25908;Cg27196;Cg27772;Cg28001;Cg28003;Cg29310;novel.2029;novel.2109;novel.2172;novel.2257;novel.2259;novel.2708;novel.2709;no…	K04371+K00922+K01116+K01116+K01116+K04688+K02649+K03097+K07203+K00922+K10159+K10160+K10159+K10159+K04361+K03115+K02649+K02649+K04348+K04467+K04467+K04448+K01110+K03175+K02580+K04447+K04447+K04447+K04447+K04447+K03175+K07827+K07827+K03097+K04368+K06268+K04456+K04456+K04456+K04447+K02649+K02649+K10160+K10160+K10159+K10159+K10159+K10159+K10159+K02649+K04361
Metabolism	Glycan biosynthesis and metabolism	N-Glycan biosynthesis	50	ko00510	Cg00049;Cg00195;Cg03776;Cg05379;Cg05517;Cg05716;Cg07577;Cg07640;Cg09807;Cg10200;Cg10308;Cg11156;Cg13522;Cg13562;Cg13871;Cg13967;Cg14467;Cg14526;Cg14603;Cg14616;Cg14832;Cg15252;Cg16468;Cg18383;Cg18443;Cg18540;Cg19487;Cg19495;Cg20712;Cg20926;Cg21048;Cg21270;Cg21447;Cg21837;Cg22071;Cg24382;Cg24818;Cg24821;Cg26076;Cg26172;Cg27043;Cg27260;Cg27280;Cg28642;Cg30081;Cg30084;Cg30086;Cg30088;Cg30089;novel.2…	K01231+K00726+K03845+K12670+K12670+K00721+K01230+K01230+K07966+K07432+K03847+K12666+K00729+K01001+K13748+K07252+K00744+K23741+K00738+K00738+K12669+K03844+K12345+K03848+K03843+K07441+K03842+K01231+K07151+K13748+K07151+K13748+K13748+K12667+K03849+K03846+K01228+K00736+K00902+K13748+K01231+K01231+K00717+K05546+K13748+K13748+K13748+K13748+K13748+K03847
Metabolism	Xenobiotics biodegradation and metabolism	Drug metabolism - cytochrome P450	50	ko00982	Cg03652;Cg03653;Cg03670;Cg04689;Cg04708;Cg04750;Cg04751;Cg05187;Cg05706;Cg06006;Cg08543;Cg08544;Cg08939;Cg08943;Cg08950;Cg08951;Cg09472;Cg09473;Cg09566;Cg09568;Cg11102;Cg11167;Cg11224;Cg11326;Cg11331;Cg11332;Cg11333;Cg11334;Cg11335;Cg11336;Cg12204;Cg12205;Cg12206;Cg13536;Cg14777;Cg16214;Cg18249;Cg19519;Cg20311;Cg21078;Cg21117;Cg21717;Cg21718;Cg24135;Cg24607;Cg25101;Cg27420;Cg27509;novel.5205;nove…	K00799+K00799+K00485+K04097+K04097+K00799+K00799+K00799+K00799+K13299+K00799+K00799+K00485+K00485+K00485+K00485+K00799+K00799+K23790+K23790+K04097+K00485+K00799+K04097+K04097+K04097+K04097+K04097+K04097+K04097+K00799+K00799+K00799+K00799+K00799+K00485+K00274+K00799+K00799+K04097+K00485+K00799+K00799+K00799+K00274+K00799+K00485+K00274+K00799+K00485
Genetic Information Processing	Replication and repair	Nucleotide excision repair	50	ko03420	Cg00173;Cg01033;Cg02429;Cg03848;Cg04741;Cg05757;Cg05775;Cg05821;Cg06521;Cg07816;Cg08957;Cg09644;Cg10916;Cg12309;Cg13642;Cg13890;Cg13913;Cg14183;Cg14634;Cg15715;Cg16503;Cg16900;Cg17958;Cg18173;Cg18990;Cg19637;Cg21025;Cg22124;Cg22237;Cg22598;Cg22694;Cg23209;Cg23451;Cg24128;Cg24151;Cg27059;Cg27367;Cg27490;Cg27609;Cg28113;novel.1121;novel.1168;novel.1419;novel.2617;novel.3333;novel.3862;novel.4932;no…	K06634+K10847+K10838+K10756+K03505+K03142+K10140+K10755+K10747+K10843+K10838+K10838+K10838+K10838+K02324+K10756+K10740+K02202+K03144+K03868+K02326+K10841+K04802+K10570+K10839+K10747+K10610+K10754+K02327+K03141+K03141+K10755+K03504+K10846+K10609+K10844+K02325+K03506+K10842+K02328+K10838+K10838+K03143+K10838+K10838+K10838+K10838+K10838+K10838+K10838
Genetic Information Processing	Replication and repair	Fanconi anemia pathway	50	ko03460	Cg04255;Cg04606;Cg04607;Cg05870;Cg06388;Cg06797;Cg06830;Cg06863;Cg08188;Cg08463;Cg09239;Cg10089;Cg10413;Cg11035;Cg11976;Cg13913;Cg14379;Cg15253;Cg15829;Cg15882;Cg18274;Cg19496;Cg19579;Cg19596;Cg20916;Cg21394;Cg21855;Cg22081;Cg24759;Cg24857;Cg25877;Cg26198;Cg26771;Cg26946;Cg27020;Cg27021;Cg27098;Cg27272;Cg27628;Cg27748;Cg27978;Cg28405;Cg28875;Cg28877;Cg28878;Cg28879;Cg28891;Cg29244;novel.4601;nove…	K10870+K06054+K06054+K10892+K15362+K06054+K06054+K06054+K10990+K11137+K10894+K02350+K15361+K10905+K10891+K10740+K10889+K10484+K11511+K11511+K10882+K10858+K03165+K10898+K13960+K11832+K03165+K15361+K10895+K16618+K03510+K15078+K03511+K15363+K08775+K08775+K04482+K03515+K10896+K10901+K10901+K03510+K06640+K06640+K06640+K06640+K08991+K08734+K15360+K06640
Organismal Systems	Aging	Longevity regulating pathway - mammal	49	ko04211	Cg04628;Cg05663;Cg05768;Cg05778;Cg06935;Cg07130;Cg07863;Cg09263;Cg09535;Cg09756;Cg10025;Cg10026;Cg13748;Cg15296;Cg15579;Cg15849;Cg15897;Cg16257;Cg16689;Cg16690;Cg16839;Cg17011;Cg17066;Cg18444;Cg18445;Cg18504;Cg18532;Cg18551;Cg18875;Cg19600;Cg19716;Cg19904;Cg19962;Cg20128;Cg20129;Cg20608;Cg22446;Cg22592;Cg22688;Cg25468;Cg26844;Cg27772;Cg28001;Cg28003;Cg29094;Cg29252;novel.2029;novel.2109;novel.2947	K08042+K00922+K04688+K02649+K07203+K00922+K09408+K04564+K08339+K04526+K03781+K03781+K08049+K08331+K07298+K19730+K19730+K07206+K02649+K02649+K07298+K07204+K07205+K04345+K04345+K11411+K17589+K07207+K03259+K02580+K07198+K04374+K07198+K16172+K16172+K02159+K07208+K07827+K07827+K03259+K07199+K04456+K04456+K04456+K08041+K08045+K02649+K02649+K02649
Organismal Systems	Endocrine system	Relaxin signaling pathway	49	ko04926	Cg03498;Cg04261;Cg04628;Cg05663;Cg05778;Cg07130;Cg09787;Cg13270;Cg13703;Cg13748;Cg15826;Cg16689;Cg16690;Cg17192;Cg17322;Cg17616;Cg18224;Cg18444;Cg18445;Cg18484;Cg18698;Cg18758;Cg19085;Cg19600;Cg19904;Cg21621;Cg22592;Cg22688;Cg23149;Cg23508;Cg23509;Cg23521;Cg23522;Cg24389;Cg25908;Cg26237;Cg26811;Cg27311;Cg27772;Cg28001;Cg28003;Cg29094;Cg29252;novel.2029;novel.2109;novel.2947;novel.4028;novel.6879;…	K04371+K13240+K08042+K00922+K02649+K00922+K04307+K04674+K04431+K08049+K04361+K02649+K02649+K04307+K04307+K04364+K02677+K04345+K04345+K04440+K04448+K04307+K05704+K02580+K04374+K06236+K07827+K07827+K04307+K04439+K04439+K04439+K04439+K06237+K04368+K04307+K05858+K05858+K04456+K04456+K04456+K08041+K08045+K02649+K02649+K02649+K04361+K04307+K04307
Human Diseases	Endocrine and metabolic diseases	Cushing syndrome	49	ko04934	Cg01198;Cg03498;Cg04628;Cg05072;Cg06472;Cg07033;Cg09245;Cg09302;Cg11493;Cg11693;Cg11831;Cg12066;Cg12985;Cg13409;Cg13416;Cg13417;Cg13748;Cg14664;Cg14667;Cg15826;Cg16189;Cg16190;Cg16191;Cg16192;Cg16377;Cg17671;Cg17964;Cg18444;Cg18445;Cg18579;Cg19083;Cg19186;Cg19904;Cg20920;Cg21351;Cg24725;Cg25908;Cg26409;Cg26472;Cg26811;Cg27311;Cg28112;Cg28242;Cg29094;Cg29252;Cg29427;Cg30296;novel.3834;novel.4028	K02085+K04371+K08042+K00408+K13885+K02353+K02354+K02842+K04365+K01558+K00572+K00182+K00444+K02432+K02432+K02432+K08049+K02375+K02375+K04361+K01064+K03209+K00445+K01357+K02105+K02157+K04515+K04345+K04345+K00714+K04491+K13298+K04374+K02206+K13298+K01384+K04368+K00444+K00444+K05858+K05858+K01679+K18437+K08041+K08045+K04579+K04579+K02432+K04361
Metabolism	Amino acid metabolism	Valine, leucine and isoleucine degradation	48	ko00280	Cg01299;Cg04175;Cg04848;Cg04849;Cg05180;Cg07022;Cg08642;Cg08698;Cg08701;Cg08702;Cg09125;Cg09831;Cg10040;Cg10340;Cg10348;Cg10399;Cg11072;Cg11252;Cg11829;Cg12416;Cg15640;Cg16796;Cg16882;Cg16883;Cg17949;Cg18497;Cg18535;Cg19316;Cg19363;Cg19460;Cg19845;Cg21403;Cg22049;Cg22137;Cg22279;Cg23835;Cg24380;Cg24425;Cg24501;Cg26056;Cg27025;Cg27791;Cg28024;Cg29698;Cg29873;Cg29989;Cg30193;Cg30209	K01969+K00248+K18660+K18660+K00827+K01968+K11538+K00626+K00626+K00626+K00128+K00626+K00167+K08683+K08683+K13524+K00382+K01907+K08683+K05607+K00249+K09699+K07515+K07509+K07511+K00253+K01641+K13524+K01969+K00022+K01027+K00020+K05605+K01640+K00826+K01965+K01966+K09478+K09478+K00166+K14085+K00128+K00128+K07513+K07513+K00149+K01847+K01847
Metabolism	Amino acid metabolism	Tryptophan metabolism	48	ko00380	Cg08698;Cg08701;Cg08702;Cg09125;Cg09785;Cg09831;Cg10025;Cg10026;Cg10028;Cg10211;Cg10212;Cg11072;Cg13349;Cg14520;Cg15011;Cg15013;Cg15024;Cg16882;Cg17215;Cg17352;Cg17903;Cg17949;Cg18249;Cg19460;Cg19852;Cg20205;Cg20337;Cg21112;Cg21113;Cg21894;Cg24607;Cg25725;Cg25974;Cg26675;Cg27025;Cg27214;Cg27227;Cg27509;Cg27791;Cg28024;Cg28172;Cg28447;Cg28490;Cg29133;Cg29989;Cg30487;Cg30539;Cg30540	K00626+K00626+K00626+K00128+K01432+K00626+K03781+K03781+K00502+K01426+K01426+K00382+K00816+K01593+K00453+K00453+K00453+K07515+K00825+K00825+K00252+K07511+K00274+K00022+K00463+K01556+K23234+K00816+K00816+K01593+K00274+K11182+K00486+K00486+K14085+K00452+K11182+K00274+K00128+K00128+K00658+K11182+K15791+K03392+K00149+K11182+K11182+K11182
Cellular Processes	Cell growth and death	Cell cycle	48	ko04110	Cg00173;Cg01320;Cg02695;Cg03621;Cg05092;Cg06174;Cg06733;Cg08923;Cg09611;Cg10472;Cg13740;Cg13746;Cg14183;Cg14337;Cg14393;Cg15188;Cg15715;Cg16679;Cg16971;Cg16973;Cg17958;Cg18151;Cg18381;Cg18440;Cg19366;Cg19391;Cg19393;Cg19397;Cg19436;Cg20272;Cg20319;Cg20920;Cg22298;Cg23255;Cg23387;Cg23663;Cg23850;Cg23931;Cg24900;Cg26767;Cg28875;Cg28877;Cg28878;Cg28879;novel.241;novel.871;novel.3858;novel.6636	K06634+K23605+K04501+K03352+K16332+K05868+K02212+K06643+K10151+K02540+K04498+K04498+K02202+K03357+K03350+K03349+K03868+K03875+K04402+K04402+K04802+K06067+K06642+K03364+K04377+K04402+K04402+K04402+K03363+K03347+K03094+K02206+K06631+K03353+K03351+K04683+K03363+K21771+K02210+K21770+K06640+K06640+K06640+K06640+K06643+K06643+K12456+K06640
Cellular Processes	Cellular community - eukaryotes	Tight junction	48	ko04530	Cg01251;Cg01253;Cg04681;Cg05025;Cg05731;Cg06987;Cg06988;Cg06990;Cg11323;Cg13053;Cg13065;Cg13445;Cg13681;Cg13703;Cg15579;Cg16839;Cg17919;Cg17920;Cg17958;Cg18064;Cg18065;Cg18252;Cg18426;Cg18444;Cg18445;Cg18484;Cg18698;Cg19085;Cg19716;Cg19756;Cg19962;Cg23987;Cg24609;Cg24912;Cg25834;Cg25961;Cg26525;Cg26844;Cg27201;Cg28522;Cg28655;Cg28657;Cg28688;Cg29350;Cg29351;Cg30069;Cg30237;Cg30238	K07901+K07901+K06069+K04393+K06093+K04513+K04513+K04513+K07374+K03456+K03456+K07374+K05692+K04431+K07298+K07298+K07374+K07374+K04802+K07374+K07374+K04392+K04416+K04345+K04345+K04440+K04448+K05704+K07198+K04382+K07198+K04354+K04392+K05719+K04393+K06100+K18050+K07199+K04393+K04393+K04393+K04392+K04393+K07374+K07374+K04237+K05719+K05719
Metabolism	Carbohydrate metabolism	Glycolysis / Gluconeogenesis	47	ko00010	Cg02711;Cg03744;Cg03745;Cg04669;Cg04748;Cg05774;Cg05789;Cg06524;Cg06525;Cg06526;Cg08189;Cg09125;Cg11072;Cg11903;Cg13936;Cg14776;Cg16804;Cg18289;Cg18290;Cg19921;Cg20068;Cg22558;Cg22586;Cg22649;Cg22679;Cg24031;Cg24044;Cg24445;Cg24560;Cg24577;Cg25470;Cg26680;Cg26748;Cg27025;Cg27273;Cg27791;Cg27935;Cg28024;Cg28255;Cg28925;Cg28936;Cg28937;Cg29989;novel.1754;novel.2059;novel.5774;novel.6096	K00873+K01596+K01596+K01689+K01623+K01803+K01785+K01810+K01810+K01810+K00161+K00128+K00382+K00162+K15779+K00927+K01895+K01835+K01835+K03103+K00850+K00627+K00134+K00627+K00134+K01785+K01689+K00844+K00844+K00844+K01834+K08074+K01895+K14085+K03841+K00128+K01785+K00128+K01792+K01785+K01785+K01785+K00149+K01785+K01084+K00873+K00844
Metabolism	Xenobiotics biodegradation and metabolism	Metabolism of xenobiotics by cytochrome P450	47	ko00980	Cg02817;Cg03652;Cg03653;Cg04464;Cg04465;Cg04466;Cg04469;Cg04470;Cg04689;Cg04708;Cg04750;Cg04751;Cg05187;Cg05706;Cg06006;Cg08543;Cg08544;Cg09472;Cg09473;Cg09566;Cg09568;Cg11102;Cg11224;Cg11326;Cg11331;Cg11332;Cg11333;Cg11334;Cg11335;Cg11336;Cg12204;Cg12205;Cg12206;Cg13536;Cg14777;Cg19519;Cg20311;Cg21078;Cg21717;Cg21718;Cg22153;Cg24043;Cg24135;Cg25101;Cg29689;Cg29856;novel.5205	K15680+K00799+K00799+K00079+K00079+K00079+K00079+K00079+K04097+K04097+K00799+K00799+K00799+K00799+K13299+K00799+K00799+K00799+K00799+K23790+K23790+K04097+K00799+K04097+K04097+K04097+K04097+K04097+K04097+K04097+K00799+K00799+K00799+K00799+K00799+K00799+K00799+K04097+K00799+K00799+K00079+K00078+K00799+K00799+K11822+K11822+K00799
Genetic Information Processing	Replication and repair	Homologous recombination	47	ko03440	Cg03083;Cg04255;Cg04302;Cg04741;Cg05091;Cg06059;Cg06388;Cg08824;Cg11656;Cg12800;Cg13913;Cg14310;Cg14590;Cg16102;Cg16283;Cg16769;Cg18274;Cg18489;Cg19579;Cg20169;Cg20506;Cg21282;Cg21855;Cg22237;Cg22761;Cg23451;Cg23952;Cg27020;Cg27021;Cg27098;Cg27219;Cg27748;Cg27978;Cg28113;Cg28126;Cg28708;Cg28891;Cg30025;novel.1016;novel.1884;novel.2256;novel.2736;novel.4514;novel.4762;novel.4865;novel.5750;novel.6…	K10875+K10870+K10867+K03505+K10871+K10867+K15362+K10867+K10867+K10873+K10740+K10879+K10867+K10875+K10866+K20776+K10882+K10877+K03165+K10728+K10881+K19528+K03165+K02327+K20773+K03504+K11864+K08775+K08775+K04482+K10880+K10901+K10901+K02328+K10875+K12173+K08991+K10683+K10875+K10875+K10875+K10875+K10875+K10875+K10875+K10875+K10875
Human Diseases	Infectious diseases	Amoebiasis	47	ko05146	Cg05663;Cg05778;Cg07130;Cg08933;Cg08935;Cg08940;Cg08944;Cg10660;Cg10662;Cg10664;Cg10665;Cg10666;Cg10669;Cg10672;Cg10673;Cg10676;Cg10679;Cg11510;Cg13213;Cg13407;Cg14784;Cg16689;Cg16690;Cg16833;Cg18224;Cg18444;Cg18445;Cg19321;Cg19600;Cg21621;Cg24389;Cg26330;Cg26332;Cg26811;Cg27311;Cg28759;Cg29094;novel.2029;novel.2109;novel.2172;novel.2257;novel.2259;novel.2708;novel.2709;novel.2710;novel.2712;nove…	K00922+K02649+K00922+K10159+K10160+K10159+K10159+K05636+K05636+K05636+K05636+K05636+K05636+K05636+K05636+K05636+K05636+K05717+K07888+K07889+K05635+K02649+K02649+K06240+K02677+K04345+K04345+K05637+K02580+K06236+K06237+K02187+K02187+K05858+K05858+K01476+K08041+K02649+K02649+K10160+K10160+K10159+K10159+K10159+K10159+K10159+K02649
Metabolism	Carbohydrate metabolism	Butanoate metabolism	46	ko00650	Cg02329;Cg02330;Cg02332;Cg02345;Cg02363;Cg02366;Cg02371;Cg02374;Cg02687;Cg04175;Cg08698;Cg08701;Cg08702;Cg09831;Cg10399;Cg10934;Cg11252;Cg15157;Cg16882;Cg17949;Cg18327;Cg18535;Cg19316;Cg19419;Cg19460;Cg19845;Cg22082;Cg22083;Cg22137;Cg22207;Cg22208;Cg26612;Cg26613;Cg28481;Cg29994;novel.313;novel.484;novel.967;novel.1059;novel.1072;novel.2085;novel.2656;novel.4251;novel.4381;novel.4583;novel.6905	K00019+K00019+K00019+K00019+K00019+K00019+K00019+K00019+K00019+K00248+K00626+K00626+K00626+K00626+K13524+K00139+K01907+K01580+K07515+K07511+K01896+K01641+K13524+K00019+K00022+K01027+K00019+K00019+K01640+K00019+K00019+K00019+K00019+K00109+K00139+K00019+K00019+K00019+K00019+K00019+K00019+K00019+K00019+K00019+K00019+K00019
Organismal Systems	Development	Axon guidance	46	ko04360	Cg02812;Cg03498;Cg05025;Cg05072;Cg05663;Cg05723;Cg05724;Cg05725;Cg05731;Cg05778;Cg06987;Cg06988;Cg06990;Cg07130;Cg12985;Cg16689;Cg16690;Cg17964;Cg17970;Cg18223;Cg18224;Cg18252;Cg19085;Cg20435;Cg22090;Cg22592;Cg22688;Cg23068;Cg24609;Cg24912;Cg25834;Cg26409;Cg26472;Cg27196;Cg27201;Cg27590;Cg28522;Cg28655;Cg28657;Cg28688;Cg30069;Cg30237;Cg30238;novel.2029;novel.2109;novel.2947	K06766+K04371+K04393+K00408+K00922+K01116+K01116+K01116+K06093+K02649+K04513+K04513+K04513+K00922+K00444+K02649+K02649+K04515+K04348+K13578+K02677+K04392+K05704+K16621+K04671+K07827+K07827+K05128+K04392+K05719+K04393+K00444+K00444+K06268+K04393+K23096+K04393+K04393+K04392+K04393+K04237+K05719+K05719+K02649+K02649+K02649
Metabolism	Carbohydrate metabolism	Glyoxylate and dicarboxylate metabolism	45	ko00630	Cg02900;Cg03164;Cg04728;Cg05125;Cg05126;Cg05127;Cg05372;Cg05373;Cg05521;Cg05522;Cg05523;Cg06098;Cg06457;Cg08445;Cg08698;Cg08701;Cg08702;Cg09158;Cg09785;Cg09808;Cg09831;Cg10025;Cg10026;Cg11072;Cg11911;Cg11912;Cg12192;Cg15324;Cg15577;Cg15578;Cg15735;Cg16804;Cg18270;Cg18989;Cg19509;Cg20718;Cg23835;Cg24380;Cg26748;Cg28791;Cg30193;Cg30209;Cg30689;novel.1810;novel.2572	K01681+K01681+K00026+K00049+K00049+K00049+K01915+K01915+K01915+K01915+K01915+K02437+K00830+K01915+K00626+K00626+K00626+K19269+K01432+K19269+K00626+K03781+K03781+K00382+K11529+K11529+K00605+K00049+K01915+K01915+K00049+K01895+K00281+K01816+K00600+K00600+K01965+K01966+K01895+K00025+K01847+K01847+K01647+K01915+K01915
Organismal Systems	Immune system	Toll-like receptor signaling pathway	45	ko04620	Cg03498;Cg05663;Cg05778;Cg07130;Cg08933;Cg08935;Cg08940;Cg08944;Cg09739;Cg10720;Cg10724;Cg10730;Cg10736;Cg10739;Cg12265;Cg12266;Cg12848;Cg12849;Cg13703;Cg16689;Cg16690;Cg18231;Cg18232;Cg18252;Cg18484;Cg18698;Cg19540;Cg19600;Cg22409;Cg24609;Cg25908;Cg27772;Cg28001;Cg28003;Cg28657;novel.2029;novel.2109;novel.2172;novel.2257;novel.2259;novel.2708;novel.2709;novel.2710;novel.2712;novel.2947	K04371+K00922+K02649+K00922+K10159+K10160+K10159+K10159+K04427+K05410+K05410+K05410+K05410+K05410+K05410+K05410+K05410+K05410+K04431+K02649+K02649+K04467+K04467+K04392+K04440+K04448+K03175+K02580+K03175+K04392+K04368+K04456+K04456+K04456+K04392+K02649+K02649+K10160+K10160+K10159+K10159+K10159+K10159+K10159+K02649
Organismal Systems	Endocrine system	Thyroid hormone signaling pathway	45	ko04919	Cg03498;Cg05072;Cg05561;Cg05663;Cg05723;Cg05724;Cg05725;Cg05778;Cg06935;Cg07130;Cg08923;Cg12710;Cg13372;Cg13508;Cg13681;Cg13740;Cg13746;Cg16377;Cg16689;Cg16690;Cg18151;Cg18224;Cg18444;Cg18445;Cg18551;Cg19085;Cg19366;Cg19588;Cg21274;Cg22446;Cg22592;Cg22688;Cg24645;Cg25908;Cg26811;Cg27311;Cg27772;Cg28001;Cg28003;Cg29149;novel.241;novel.871;novel.2029;novel.2109;novel.2947	K04371+K00408+K06493+K00922+K01116+K01116+K01116+K02649+K07203+K00922+K06643+K06062+K08362+K02599+K05692+K04498+K04498+K02105+K02649+K02649+K06067+K02677+K04345+K04345+K07207+K05704+K04377+K06276+K05857+K07208+K07827+K07827+K05860+K04368+K05858+K05858+K04456+K04456+K04456+K06493+K06643+K06643+K02649+K02649+K02649
Human Diseases	Neurodegenerative disease	Spinocerebellar ataxia	45	ko05017	Cg01403;Cg02593;Cg03277;Cg05309;Cg05663;Cg05778;Cg06631;Cg06744;Cg06935;Cg07103;Cg07130;Cg10587;Cg10589;Cg12008;Cg13241;Cg13708;Cg14062;Cg15296;Cg15522;Cg15849;Cg15897;Cg16689;Cg16690;Cg16806;Cg17749;Cg18224;Cg18235;Cg18484;Cg18532;Cg18986;Cg22913;Cg24038;Cg26811;Cg26845;Cg27311;Cg27772;Cg28001;Cg28003;Cg28406;Cg28479;Cg28716;novel.2029;novel.2109;novel.2947;novel.3449	K03120+K03120+K03120+K08269+K00922+K02649+K23616+K09027+K07203+K08333+K00922+K06249+K06249+K03120+K03173+K08334+K03124+K08331+K03173+K19730+K19730+K02649+K02649+K05213+K05210+K02677+K08852+K04440+K17589+K03120+K06053+K14564+K05858+K17889+K05858+K04456+K04456+K04456+K00914+K17906+K03120+K02649+K02649+K02649+K06249
Human Diseases	Cancers	Chronic myeloid leukemia	45	ko05220	Cg01320;Cg02695;Cg03498;Cg05663;Cg05775;Cg05778;Cg07130;Cg08923;Cg09517;Cg11493;Cg13270;Cg15786;Cg15787;Cg16689;Cg16690;Cg16971;Cg16973;Cg17616;Cg18151;Cg18231;Cg18232;Cg19366;Cg19391;Cg19393;Cg19397;Cg19600;Cg20608;Cg22592;Cg22688;Cg24261;Cg25908;Cg26771;Cg27649;Cg27650;Cg27772;Cg28001;Cg28003;Cg29192;Cg29193;Cg29286;novel.241;novel.871;novel.2029;novel.2109;novel.2947	K23605+K04501+K04371+K00922+K10140+K02649+K00922+K06643+K14021+K04365+K04674+K04707+K04707+K02649+K02649+K04402+K04402+K04364+K06067+K04467+K04467+K04377+K04402+K04402+K04402+K02580+K02159+K07827+K07827+K04496+K04368+K03511+K04570+K04570+K04456+K04456+K04456+K04570+K04570+K04570+K06643+K06643+K02649+K02649+K02649
Human Diseases	Drug resistance	EGFR tyrosine kinase inhibitor resistance	44	ko01521	Cg03498;Cg05663;Cg05723;Cg05724;Cg05725;Cg05768;Cg05778;Cg06935;Cg07130;Cg07863;Cg11493;Cg15826;Cg16689;Cg16690;Cg17066;Cg17616;Cg18224;Cg18875;Cg19034;Cg19085;Cg20608;Cg21558;Cg21691;Cg21692;Cg21693;Cg21694;Cg22592;Cg22688;Cg25468;Cg25908;Cg27649;Cg27650;Cg27688;Cg27772;Cg28001;Cg28003;Cg29192;Cg29193;Cg29286;Cg29310;novel.2029;novel.2109;novel.2947;novel.4028	K04371+K00922+K01116+K01116+K01116+K04688+K02649+K07203+K00922+K09408+K04365+K04361+K02649+K02649+K07205+K04364+K02677+K03259+K01110+K05704+K02159+K04447+K04447+K04447+K04447+K04447+K07827+K07827+K03259+K04368+K04570+K04570+K02991+K04456+K04456+K04456+K04570+K04570+K04570+K04447+K02649+K02649+K02649+K04361
Organismal Systems	Aging	Longevity regulating pathway - multiple species	44	ko04213	Cg04628;Cg05663;Cg05768;Cg05778;Cg06935;Cg07130;Cg07863;Cg08305;Cg09263;Cg09535;Cg09756;Cg10025;Cg10026;Cg13748;Cg16689;Cg16690;Cg17011;Cg17505;Cg17506;Cg17507;Cg17918;Cg18151;Cg18444;Cg18445;Cg18504;Cg19716;Cg19962;Cg20128;Cg20129;Cg20195;Cg20410;Cg21515;Cg22592;Cg22688;Cg26844;Cg27772;Cg28001;Cg28003;Cg29094;Cg29252;novel.2029;novel.2109;novel.2947;novel.6994	K08042+K00922+K04688+K02649+K07203+K00922+K09408+K04565+K04564+K08339+K04526+K03781+K03781+K08049+K02649+K02649+K07204+K03283+K03283+K03283+K03283+K06067+K04345+K04345+K11411+K07198+K07198+K16172+K16172+K03283+K09542+K09542+K07827+K07827+K07199+K04456+K04456+K04456+K08041+K08045+K02649+K02649+K02649+K04565
Environmental Information Processing	Signal transduction	Notch signaling pathway	44	ko04330	Cg04606;Cg04607;Cg05145;Cg05148;Cg05376;Cg05377;Cg05378;Cg05518;Cg05519;Cg05520;Cg06631;Cg06797;Cg06830;Cg06863;Cg07033;Cg07249;Cg08677;Cg12710;Cg13034;Cg13421;Cg13508;Cg13740;Cg13746;Cg13900;Cg13907;Cg15378;Cg15630;Cg15687;Cg17900;Cg18151;Cg20809;Cg22053;Cg22491;Cg22913;Cg23536;Cg23537;Cg23539;Cg23540;Cg23872;Cg24261;Cg27011;Cg27596;Cg28200;Cg29939	K06054+K06054+K06051+K06051+K06058+K06058+K06058+K06058+K06058+K06058+K23616+K06054+K06054+K06054+K02353+K06058+K21635+K06062+K06051+K06171+K02599+K04498+K04498+K06051+K06061+K06059+K06059+K06059+K05948+K06067+K06172+K06058+K09091+K06053+K06058+K06058+K06058+K06058+K06058+K04496+K04497+K06063+K06052+K06066
Human Diseases	Endocrine and metabolic diseases	Insulin resistance	44	ko04931	Cg02438;Cg03744;Cg03745;Cg05531;Cg05663;Cg05768;Cg05778;Cg06935;Cg07130;Cg08640;Cg08641;Cg09481;Cg09756;Cg16689;Cg16690;Cg17068;Cg18484;Cg19034;Cg19497;Cg19588;Cg19600;Cg19716;Cg19962;Cg20113;Cg20128;Cg20129;Cg26525;Cg26844;Cg27758;Cg27760;Cg27762;Cg27764;Cg27765;Cg27772;Cg27899;Cg27991;Cg28001;Cg28003;Cg28844;Cg28963;novel.2029;novel.2059;novel.2109;novel.2947	K08765+K01596+K01596+K06269+K00922+K04688+K02649+K07203+K00922+K00688+K08765+K04373+K04526+K02649+K02649+K00820+K04440+K01110+K06269+K06276+K02580+K07198+K07198+K00693+K16172+K16172+K18050+K07199+K06269+K06269+K06269+K06269+K06269+K04456+K00688+K06269+K04456+K04456+K06269+K08765+K02649+K01084+K02649+K02649
Genetic Information Processing	Translation	Aminoacyl-tRNA biosynthesis	43	ko00970	Cg00287;Cg00318;Cg04305;Cg04432;Cg04629;Cg04786;Cg04831;Cg05186;Cg05976;Cg07809;Cg08118;Cg09580;Cg10279;Cg10513;Cg10651;Cg13587;Cg13775;Cg14635;Cg14811;Cg14836;Cg15012;Cg15014;Cg15647;Cg16323;Cg16941;Cg17413;Cg18034;Cg20325;Cg20482;Cg22967;Cg23919;Cg24230;Cg24485;Cg24515;Cg24776;Cg26032;Cg26107;Cg26975;Cg27124;Cg27217;Cg28919;Cg29573;novel.5327	K00604+K00604+K01876+K04567+K01872+K01889+K01890+K01887+K01869+K01867+K01866+K02433+K01886+K01870+K01875+K02434+K01893+K01873+K01869+K01892+K01867+K01867+K01873+K01887+K01866+K01889+K01881+K22503+K01883+K01874+K01885+K03341+K10837+K10837+K01874+K01868+K01872+K14163+K01875+K01870+K01893+K01880+K01874
Genetic Information Processing	Replication and repair	Base excision repair	43	ko03410	Cg04599;Cg04741;Cg05041;Cg05078;Cg06521;Cg06546;Cg06692;Cg07734;Cg07735;Cg07913;Cg11118;Cg11125;Cg12308;Cg13642;Cg16503;Cg16544;Cg17067;Cg17257;Cg17451;Cg17599;Cg17789;Cg17790;Cg17958;Cg19637;Cg19702;Cg19976;Cg22237;Cg23451;Cg23672;Cg25162;Cg26027;Cg26905;Cg27367;Cg27490;Cg28113;Cg29205;Cg29258;Cg30035;Cg30037;Cg30039;Cg30042;Cg30080;Cg30602	K10776+K03505+K10803+K10798+K10747+K04799+K10798+K10798+K10798+K10771+K10801+K10772+K20813+K02324+K02326+K03660+K02330+K03652+K03652+K03575+K10773+K10773+K04802+K10747+K10771+K10771+K02327+K03504+K03648+K03512+K10567+K24070+K02325+K03506+K02328+K03648+K03648+K10798+K10798+K10798+K10798+K10803+K10569
Environmental Information Processing	Signal transduction	TGF-beta signaling pathway	43	ko04350	Cg00199;Cg01320;Cg02695;Cg02812;Cg03498;Cg04827;Cg04828;Cg05768;Cg06987;Cg06988;Cg06990;Cg13053;Cg13065;Cg13170;Cg13202;Cg13270;Cg13740;Cg13746;Cg14482;Cg15715;Cg16818;Cg16862;Cg17629;Cg17907;Cg17915;Cg18024;Cg18223;Cg18743;Cg19366;Cg19655;Cg19756;Cg19818;Cg19822;Cg20272;Cg20319;Cg20435;Cg22090;Cg23663;Cg27590;Cg27918;Cg28563;Cg29596;Cg29729	K04677+K23605+K04501+K06766+K04371+K04657+K04657+K04688+K04513+K04513+K04513+K03456+K03456+K06825+K04675+K04674+K04498+K04498+K16790+K03868+K04679+K19553+K04678+K04686+K21283+K17693+K13578+K04666+K04377+K06825+K04382+K04658+K04658+K03347+K03094+K16621+K04671+K04683+K23096+K21283+K04661+K22687+K10162
Environmental Information Processing	Signal transduction	VEGF signaling pathway	43	ko04370	Cg03498;Cg05025;Cg05663;Cg05723;Cg05724;Cg05725;Cg05778;Cg07130;Cg15512;Cg15517;Cg15518;Cg15519;Cg16689;Cg16690;Cg17248;Cg17249;Cg17443;Cg17444;Cg17970;Cg18224;Cg18252;Cg19085;Cg22592;Cg22688;Cg23851;Cg23852;Cg24609;Cg25834;Cg25908;Cg27196;Cg27201;Cg27772;Cg28001;Cg28003;Cg28522;Cg28655;Cg28657;Cg28688;novel.2029;novel.2109;novel.2947;novel.4349;novel.4350	K04371+K04393+K00922+K01116+K01116+K01116+K02649+K00922+K11987+K11987+K11987+K16342+K02649+K02649+K04718+K04718+K04718+K04718+K04348+K02677+K04392+K05704+K07827+K07827+K16342+K16342+K04392+K04393+K04368+K06268+K04393+K04456+K04456+K04456+K04393+K04393+K04392+K04393+K02649+K02649+K02649+K11987+K11987
Human Diseases	Infectious diseases	Epithelial cell signaling in Helicobacter pylori infection	43	ko05120	Cg05025;Cg05321;Cg05723;Cg05724;Cg05725;Cg07998;Cg12839;Cg13884;Cg15378;Cg15609;Cg15630;Cg15687;Cg15826;Cg16466;Cg18231;Cg18232;Cg18252;Cg18447;Cg18484;Cg18698;Cg19085;Cg19600;Cg19706;Cg19972;Cg20027;Cg20437;Cg20734;Cg22481;Cg24433;Cg24434;Cg24495;Cg24609;Cg25595;Cg25834;Cg26330;Cg26332;Cg27201;Cg28265;Cg28522;Cg28655;Cg28657;Cg28688;novel.4028	K04393+K02146+K01116+K01116+K01116+K02150+K03662+K02155+K06059+K02152+K06059+K06059+K04361+K02145+K04467+K04467+K04392+K03661+K04440+K04448+K05704+K02580+K02154+K02154+K02144+K02154+K02151+K02148+K02147+K02147+K02147+K04392+K02153+K04393+K02187+K02187+K04393+K02149+K04393+K04393+K04392+K04393+K04361
Human Diseases	Cancers	Central carbon metabolism in cancer	43	ko05230	Cg02711;Cg03498;Cg05663;Cg05778;Cg06852;Cg06853;Cg06935;Cg07130;Cg08189;Cg09456;Cg09457;Cg11903;Cg13024;Cg13529;Cg14589;Cg15826;Cg16689;Cg16690;Cg16864;Cg17721;Cg17722;Cg19034;Cg19366;Cg20068;Cg20758;Cg21626;Cg22592;Cg22688;Cg24445;Cg24560;Cg24577;Cg25470;Cg25908;Cg27772;Cg28001;Cg28003;Cg28443;novel.2029;novel.2109;novel.2947;novel.4028;novel.5774;novel.6096	K00873+K04371+K00922+K02649+K13780+K13780+K07203+K00922+K00161+K14634+K14634+K00162+K00036+K13780+K13780+K04361+K02649+K02649+K11416+K11416+K11416+K01110+K04377+K00850+K01425+K11413+K07827+K07827+K00844+K00844+K00844+K01834+K04368+K04456+K04456+K04456+K11416+K02649+K02649+K02649+K04361+K00873+K00844
Metabolism	Glycan biosynthesis and metabolism	Other glycan degradation	42	ko00511	Cg00659;Cg00661;Cg00802;Cg00958;Cg01202;Cg02143;Cg02456;Cg02457;Cg02910;Cg03175;Cg05554;Cg06950;Cg09635;Cg11159;Cg11161;Cg11164;Cg11165;Cg11442;Cg12057;Cg13138;Cg13148;Cg14242;Cg17384;Cg17385;Cg17386;Cg17400;Cg17431;Cg18006;Cg18057;Cg18058;Cg21001;Cg21624;Cg21625;Cg22989;Cg22990;Cg26060;Cg26602;Cg26926;Cg27224;Cg28886;Cg30300;novel.818	K12373+K12373+K12373+K12373+K12373+K12373+K12373+K12373+K12373+K12373+K12373+K12373+K01191+K01206+K01206+K01206+K01206+K12373+K01206+K12373+K01444+K01444+K01206+K01206+K01206+K01206+K14459+K01227+K12311+K12311+K01201+K12373+K12373+K01192+K01192+K17108+K12373+K01201+K01201+K01444+K01206+K12373
Cellular Processes	Cell growth and death	Apoptosis - multiple species	42	ko04215	Cg07344;Cg07346;Cg07352;Cg07358;Cg07363;Cg07365;Cg07368;Cg07641;Cg07804;Cg07837;Cg07898;Cg07899;Cg07900;Cg07910;Cg07911;Cg08212;Cg09085;Cg09285;Cg09336;Cg09517;Cg09542;Cg13708;Cg18464;Cg18484;Cg20608;Cg24441;Cg24442;Cg24488;Cg24489;Cg26330;Cg26332;Cg27649;Cg27650;Cg29192;Cg29193;Cg29286;novel.2025;novel.2070;novel.2071;novel.2298;novel.2354;novel.3964	K16060+K16060+K16060+K16060+K16060+K16060+K16060+K16060+K16061+K16061+K16060+K16060+K16060+K16060+K16060+K16060+K16060+K16061+K16060+K14021+K16061+K08334+K10586+K04440+K02159+K16061+K16061+K16061+K16061+K02187+K02187+K04570+K04570+K04570+K04570+K04570+K16060+K16060+K16060+K16061+K16061+K16061
Organismal Systems	Nervous system	Cholinergic synapse	42	ko04725	Cg03498;Cg04423;Cg04628;Cg05663;Cg05778;Cg05935;Cg06586;Cg06587;Cg07130;Cg13748;Cg16689;Cg16690;Cg17964;Cg18130;Cg18224;Cg18444;Cg18445;Cg18633;Cg19904;Cg20694;Cg21558;Cg21691;Cg21692;Cg21693;Cg21694;Cg22592;Cg22688;Cg23880;Cg24644;Cg25908;Cg26608;Cg26811;Cg27311;Cg27772;Cg28001;Cg28003;Cg29094;Cg29252;Cg29310;novel.2029;novel.2109;novel.2947	K04371+K04809+K08042+K00922+K02649+K04808+K04808+K04808+K00922+K08049+K02649+K02649+K04515+K00623+K02677+K04345+K04345+K04815+K04374+K04131+K04447+K04447+K04447+K04447+K04447+K07827+K07827+K04808+K04808+K04368+K04131+K05858+K05858+K04456+K04456+K04456+K08041+K08045+K04447+K02649+K02649+K02649
Human Diseases	Infectious diseases	Legionellosis	42	ko05134	Cg04661;Cg07853;Cg07997;Cg08933;Cg08935;Cg08940;Cg08944;Cg14631;Cg16771;Cg17491;Cg17492;Cg17493;Cg17494;Cg17495;Cg17505;Cg17506;Cg17507;Cg17918;Cg17940;Cg18660;Cg18722;Cg19001;Cg19600;Cg20195;Cg21982;Cg24018;Cg25347;Cg26330;Cg26332;Cg26900;Cg26902;Cg27595;Cg29541;Cg29552;Cg30070;novel.2172;novel.2257;novel.2259;novel.2708;novel.2709;novel.2710;novel.2712	K07937+K07937+K15485+K10159+K10160+K10159+K10159+K08517+K13525+K07937+K07937+K07937+K07937+K07937+K03283+K03283+K03283+K03283+K07953+K07874+K07953+K14416+K02580+K03283+K03231+K03231+K15464+K02187+K02187+K07874+K07874+K07874+K04077+K04077+K07937+K10160+K10160+K10159+K10159+K10159+K10159+K10159
Human Diseases	Infectious diseases	Chagas disease (American trypanosomiasis)	42	ko05142	Cg03498;Cg05663;Cg05778;Cg07130;Cg08933;Cg08935;Cg08940;Cg08944;Cg10565;Cg13053;Cg13065;Cg13270;Cg16689;Cg16690;Cg18231;Cg18232;Cg18484;Cg18698;Cg18793;Cg19540;Cg19600;Cg19756;Cg22409;Cg23987;Cg24942;Cg26811;Cg27311;Cg27772;Cg28001;Cg28003;Cg29094;Cg30496;novel.2029;novel.2109;novel.2172;novel.2257;novel.2259;novel.2708;novel.2709;novel.2710;novel.2712;novel.2947	K04371+K00922+K02649+K00922+K10159+K10160+K10159+K10159+K08057+K03456+K03456+K04674+K02649+K02649+K04467+K04467+K04440+K04448+K08057+K03175+K02580+K04382+K03175+K04354+K04389+K05858+K05858+K04456+K04456+K04456+K08041+K08057+K02649+K02649+K10160+K10160+K10159+K10159+K10159+K10159+K10159+K02649
Metabolism	Glycan biosynthesis and metabolism	Glycosaminoglycan degradation	41	ko00531	Cg00659;Cg00661;Cg00802;Cg00958;Cg01202;Cg02143;Cg02456;Cg02457;Cg02910;Cg03175;Cg05554;Cg06189;Cg06610;Cg06612;Cg06950;Cg07089;Cg07108;Cg07109;Cg11442;Cg13138;Cg14627;Cg15709;Cg15710;Cg16803;Cg18333;Cg18749;Cg20313;Cg20499;Cg21624;Cg21625;Cg24951;Cg26573;Cg26574;Cg26575;Cg26576;Cg26578;Cg26579;Cg26602;Cg29386;novel.818;novel.6398	K12373+K12373+K12373+K12373+K12373+K12373+K12373+K12373+K12373+K12373+K12373+K01132+K01197+K01197+K12373+K01195+K01135+K01135+K12373+K12373+K01136+K01135+K01135+K01205+K01565+K10532+K01135+K01137+K12373+K12373+K07964+K01135+K01135+K01135+K01135+K01135+K01135+K12373+K10532+K12373+K01135
Human Diseases	Drug resistance	Endocrine resistance	41	ko01522	Cg03498;Cg04628;Cg05145;Cg05148;Cg05663;Cg05768;Cg05778;Cg06935;Cg07130;Cg08677;Cg08923;Cg11493;Cg13034;Cg13508;Cg13748;Cg13900;Cg15826;Cg16689;Cg16690;Cg17616;Cg18444;Cg18445;Cg18484;Cg18698;Cg19085;Cg20608;Cg22592;Cg22688;Cg25908;Cg27772;Cg28001;Cg28003;Cg28200;Cg29094;Cg29252;novel.241;novel.871;novel.2029;novel.2109;novel.2947;novel.4028	K04371+K08042+K06051+K06051+K00922+K04688+K02649+K07203+K00922+K21635+K06643+K04365+K06051+K02599+K08049+K06051+K04361+K02649+K02649+K04364+K04345+K04345+K04440+K04448+K05704+K02159+K07827+K07827+K04368+K04456+K04456+K04456+K06052+K08041+K08045+K06643+K06643+K02649+K02649+K02649+K04361
Organismal Systems	Immune system	Fc epsilon RI signaling pathway	41	ko04664	Cg03498;Cg05663;Cg05723;Cg05724;Cg05725;Cg05778;Cg07130;Cg13703;Cg14072;Cg15519;Cg16689;Cg16690;Cg17616;Cg18224;Cg18252;Cg18484;Cg19588;Cg22592;Cg22688;Cg23851;Cg23852;Cg24609;Cg25908;Cg26094;Cg26095;Cg26624;Cg26625;Cg26626;Cg26628;Cg26629;Cg27772;Cg28001;Cg28003;Cg28657;Cg29544;Cg29548;Cg29551;Cg29554;novel.2029;novel.2109;novel.2947	K04371+K00922+K01116+K01116+K01116+K02649+K00922+K04431+K00461+K16342+K02649+K02649+K04364+K02677+K04392+K04440+K06276+K07827+K07827+K16342+K16342+K04392+K04368+K00461+K00461+K00461+K00461+K00461+K00461+K00461+K04456+K04456+K04456+K04392+K00461+K00461+K00461+K00461+K02649+K02649+K02649
Metabolism	Amino acid metabolism	Alanine, aspartate and glutamate metabolism	40	ko00250	Cg04461;Cg04462;Cg05007;Cg05180;Cg05372;Cg05373;Cg05521;Cg05522;Cg05523;Cg05643;Cg06457;Cg06693;Cg06694;Cg06696;Cg06792;Cg06837;Cg07035;Cg08445;Cg10399;Cg10934;Cg12201;Cg14629;Cg15157;Cg15577;Cg15578;Cg16128;Cg17068;Cg19316;Cg20758;Cg23628;Cg24601;Cg26750;Cg28697;Cg29207;Cg29256;Cg29314;Cg29994;Cg30502;novel.1810;novel.2572	K00272+K00272+K00814+K00827+K01915+K01915+K01915+K01915+K01915+K00294+K00830+K00272+K00272+K00272+K11540+K11540+K01755+K01915+K13524+K00139+K00814+K01940+K01580+K01915+K01915+K00764+K00820+K13524+K01425+K14454+K13566+K01939+K13051+K13566+K13566+K01953+K00139+K01756+K01915+K01915
Metabolism	Lipid metabolism	Ether lipid metabolism	40	ko00565	Cg04180;Cg04453;Cg04551;Cg04740;Cg05037;Cg05273;Cg05274;Cg05275;Cg05941;Cg06207;Cg06208;Cg09187;Cg09475;Cg09695;Cg14427;Cg14428;Cg14429;Cg14430;Cg15519;Cg16302;Cg16788;Cg18303;Cg19334;Cg19823;Cg20100;Cg20310;Cg21026;Cg21988;Cg22280;Cg23851;Cg23852;Cg25969;Cg27695;Cg27696;Cg27833;Cg28060;Cg28357;Cg28358;Cg30414;novel.1849	K01047+K13510+K01047+K16794+K22387+K08743+K08743+K08743+K01047+K01047+K01047+K16817+K01115+K01047+K16817+K16817+K16817+K16817+K16342+K16795+K00993+K01080+K01080+K01047+K01062+K01080+K01080+K00803+K13644+K16342+K16342+K14621+K01019+K01019+K16860+K16860+K01080+K01080+K14621+K01047
Metabolism	Glycan biosynthesis and metabolism	Glycosphingolipid biosynthesis - lacto and neolacto series	40	ko00601	Cg00276;Cg00277;Cg00308;Cg00309;Cg00382;Cg02323;Cg02356;Cg03364;Cg03365;Cg04573;Cg04636;Cg04637;Cg08160;Cg08400;Cg09807;Cg10512;Cg11443;Cg11444;Cg11445;Cg12459;Cg15175;Cg15183;Cg16145;Cg17675;Cg17819;Cg17820;Cg17823;Cg17825;Cg20438;Cg20459;Cg23040;Cg23198;Cg24227;Cg24593;Cg24824;Cg26045;Cg26883;Cg30557;Cg30625;novel.4322	K07819+K07819+K07819+K07819+K00718+K07819+K07819+K07819+K07819+K07819+K00718+K00718+K07819+K07819+K07966+K00718+K00718+K00718+K00718+K00718+K07819+K07819+K07819+K07819+K00718+K00718+K00718+K00718+K07819+K00718+K00718+K00718+K00718+K07819+K00718+K00718+K07819+K07819+K00742+K07819
Human Diseases	Drug resistance	Antifolate resistance	40	ko01523	Cg01716;Cg03775;Cg04146;Cg04147;Cg04148;Cg04218;Cg05129;Cg05860;Cg09620;Cg13295;Cg13296;Cg13297;Cg13298;Cg13299;Cg13300;Cg13301;Cg13305;Cg13307;Cg13308;Cg13310;Cg13314;Cg13315;Cg13316;Cg13702;Cg14106;Cg16177;Cg18231;Cg18232;Cg19509;Cg19600;Cg19929;Cg20513;Cg20718;Cg22107;Cg23925;Cg24235;Cg26515;novel.1695;novel.4127;novel.4862	K00287+K11787+K05665+K05665+K05665+K05665+K00297+K05665+K00560+K05673+K05673+K05673+K05673+K05673+K05673+K05673+K05673+K05673+K05673+K05673+K05673+K05673+K05673+K01930+K05668+K05665+K04467+K04467+K00600+K02580+K05681+K05665+K00600+K00602+K05668+K05673+K01307+K05665+K05673+K05665
Genetic Information Processing	Transcription	Basal transcription factors	40	ko03022	Cg00173;Cg01258;Cg01403;Cg02593;Cg03277;Cg05138;Cg05757;Cg05929;Cg05930;Cg07816;Cg08258;Cg08996;Cg09041;Cg12008;Cg12850;Cg13322;Cg14062;Cg14183;Cg14634;Cg16083;Cg16474;Cg18986;Cg19269;Cg19295;Cg20498;Cg21148;Cg21193;Cg21240;Cg21241;Cg22598;Cg22694;Cg23208;Cg23775;Cg25219;Cg26596;Cg27059;Cg27361;Cg27609;Cg28716;novel.1419	K06634+K03123+K03120+K03120+K03120+K03134+K03142+K03129+K03129+K10843+K03136+K03126+K03127+K03120+K14650+K03125+K03124+K02202+K03144+K03132+K03130+K03120+K03137+K03137+K03130+K03135+K14649+K14649+K14649+K03141+K03141+K03139+K03131+K14535+K03131+K10844+K03122+K10842+K03120+K03143
Cellular Processes	Cellular community - eukaryotes	Adherens junction	40	ko04520	Cg00428;Cg00569;Cg00571;Cg00572;Cg01320;Cg01777;Cg02695;Cg03498;Cg05025;Cg05043;Cg06151;Cg06987;Cg06988;Cg06990;Cg07956;Cg09739;Cg10418;Cg13270;Cg13681;Cg13740;Cg13746;Cg15826;Cg16291;Cg16377;Cg18252;Cg19083;Cg19085;Cg20704;Cg24609;Cg24648;Cg25834;Cg26892;Cg27201;Cg28522;Cg28655;Cg28657;Cg28688;Cg30069;novel.159;novel.4028	K23612+K23612+K23612+K23612+K23605+K23612+K04501+K04371+K04393+K04468+K03097+K04513+K04513+K04513+K23612+K04427+K23612+K04674+K05692+K04498+K04498+K04361+K03115+K02105+K04392+K04491+K05704+K14394+K04392+K03097+K04393+K23612+K04393+K04393+K04393+K04392+K04393+K04237+K23612+K04361
Metabolism	Lipid metabolism	Fatty acid degradation	39	ko00071	Cg02438;Cg03711;Cg03712;Cg03777;Cg04175;Cg06622;Cg08641;Cg08698;Cg08701;Cg08702;Cg09125;Cg09831;Cg10550;Cg12286;Cg15640;Cg16882;Cg16883;Cg17903;Cg17949;Cg17973;Cg19181;Cg19460;Cg20580;Cg21108;Cg21375;Cg21942;Cg24425;Cg24501;Cg25027;Cg25028;Cg27025;Cg27791;Cg28024;Cg28268;Cg28963;Cg29698;Cg29873;Cg29989;novel.4576	K08765+K07517+K07517+K00232+K00248+K13239+K08765+K00626+K00626+K00626+K00128+K00626+K08766+K00232+K00249+K07515+K07509+K00252+K07511+K01897+K01897+K00022+K00232+K00232+K00255+K00232+K09478+K09478+K09479+K01897+K14085+K00128+K00128+K15013+K08765+K07513+K07513+K00149+K01897
Metabolism	Carbohydrate metabolism	Pyruvate metabolism	39	ko00620	Cg02711;Cg03744;Cg03745;Cg04728;Cg05125;Cg05126;Cg05127;Cg05394;Cg05500;Cg06141;Cg08189;Cg08689;Cg08698;Cg08701;Cg08702;Cg09125;Cg09411;Cg09831;Cg11072;Cg11903;Cg15324;Cg15735;Cg16804;Cg22558;Cg22649;Cg26595;Cg26748;Cg27025;Cg27736;Cg27791;Cg27963;Cg28024;Cg28112;Cg28519;Cg28520;Cg28791;Cg29524;Cg29989;novel.5774	K00873+K01596+K01596+K00026+K00049+K00049+K00049+K01676+K01676+K00102+K00161+K00029+K00626+K00626+K00626+K00128+K00029+K00626+K00382+K00162+K00049+K00049+K01895+K00627+K00627+K01958+K01895+K14085+K01759+K00128+K01759+K00128+K01679+K01512+K01512+K00025+K01069+K00149+K00873
Cellular Processes	Cellular community - eukaryotes	Gap junction	39	ko04540	Cg03498;Cg04031;Cg04628;Cg11323;Cg12541;Cg13115;Cg13389;Cg13445;Cg13457;Cg13748;Cg13808;Cg13809;Cg15826;Cg17616;Cg17919;Cg17920;Cg18064;Cg18065;Cg18224;Cg18444;Cg18445;Cg19085;Cg19411;Cg19543;Cg21623;Cg22592;Cg22688;Cg23604;Cg24305;Cg25043;Cg25431;Cg25908;Cg26811;Cg27311;Cg29094;Cg29252;Cg29350;Cg29351;novel.4028	K04371+K12319+K08042+K07374+K04145+K04145+K04145+K07374+K07375+K08049+K12318+K12319+K04361+K04364+K07374+K07374+K07374+K07374+K02677+K04345+K04345+K05704+K07375+K04141+K04157+K07827+K07827+K04144+K07375+K12319+K07375+K04368+K05858+K05858+K08041+K08045+K07374+K07374+K04361
Organismal Systems	Endocrine system	Progesterone-mediated oocyte maturation	39	ko04914	Cg03498;Cg03621;Cg04628;Cg05663;Cg05778;Cg06174;Cg07130;Cg09481;Cg09756;Cg11493;Cg13748;Cg14337;Cg14393;Cg15188;Cg16689;Cg16690;Cg18440;Cg18444;Cg18445;Cg18484;Cg20920;Cg22298;Cg22592;Cg22688;Cg23255;Cg23387;Cg23931;Cg25908;Cg26677;Cg26767;Cg27772;Cg28001;Cg28003;Cg29094;Cg29252;novel.2029;novel.2109;novel.2947;novel.3858	K04371+K03352+K08042+K00922+K02649+K05868+K00922+K04373+K04526+K04365+K08049+K03357+K03350+K03349+K02649+K02649+K03364+K04345+K04345+K04440+K02206+K06631+K07827+K07827+K03353+K03351+K21771+K04368+K04079+K21770+K04456+K04456+K04456+K08041+K08045+K02649+K02649+K02649+K12456
Metabolism	Glycan biosynthesis and metabolism	Glycosphingolipid biosynthesis - globo and isoglobo series	38	ko00603	Cg00382;Cg00659;Cg00661;Cg00802;Cg00958;Cg01202;Cg02143;Cg02456;Cg02457;Cg02910;Cg03175;Cg04636;Cg04637;Cg05554;Cg06950;Cg08462;Cg10512;Cg11442;Cg11443;Cg11444;Cg11445;Cg12459;Cg13138;Cg13468;Cg17819;Cg17820;Cg17823;Cg17825;Cg20459;Cg21624;Cg21625;Cg23040;Cg23198;Cg24227;Cg24824;Cg26045;Cg26602;novel.818	K00718+K12373+K12373+K12373+K12373+K12373+K12373+K12373+K12373+K12373+K12373+K00718+K00718+K12373+K12373+K01204+K00718+K12373+K00718+K00718+K00718+K00718+K12373+K01204+K00718+K00718+K00718+K00718+K00718+K12373+K12373+K00718+K00718+K00718+K00718+K00718+K12373+K12373
Organismal Systems	Immune system	T cell receptor signaling pathway	38	ko04660	Cg03498;Cg05025;Cg05663;Cg05723;Cg05724;Cg05725;Cg05778;Cg06987;Cg06988;Cg06990;Cg07130;Cg09739;Cg13703;Cg16689;Cg16690;Cg17616;Cg17970;Cg18231;Cg18232;Cg18484;Cg18698;Cg19588;Cg19600;Cg22592;Cg22688;Cg25834;Cg25908;Cg27196;Cg27201;Cg27772;Cg28001;Cg28003;Cg28522;Cg28655;Cg28688;novel.2029;novel.2109;novel.2947	K04371+K04393+K00922+K01116+K01116+K01116+K02649+K04513+K04513+K04513+K00922+K04427+K04431+K02649+K02649+K04364+K04348+K04467+K04467+K04440+K04448+K06276+K02580+K07827+K07827+K04393+K04368+K06268+K04393+K04456+K04456+K04456+K04393+K04393+K04393+K02649+K02649+K02649
Organismal Systems	Digestive system	Fat digestion and absorption	38	ko04975	Cg04180;Cg04551;Cg05941;Cg06207;Cg06208;Cg06407;Cg06454;Cg06472;Cg09538;Cg09539;Cg09540;Cg09541;Cg09695;Cg14047;Cg15484;Cg17174;Cg17304;Cg17306;Cg18303;Cg18410;Cg18411;Cg18412;Cg18549;Cg19005;Cg19334;Cg19823;Cg20310;Cg21026;Cg24202;Cg24203;Cg28357;Cg28358;Cg28632;Cg28633;Cg30021;novel.1849;novel.4170;novel.4175	K01047+K01047+K01047+K01047+K01047+K11155+K14074+K13885+K14073+K14073+K14073+K14073+K01047+K13509+K13509+K05641+K05641+K05641+K01080+K14075+K14075+K14075+K14075+K05641+K01080+K01047+K01080+K01080+K14073+K14073+K01080+K01080+K05683+K05684+K14074+K01047+K13509+K13509
Human Diseases	Cancers	Prostate cancer	38	ko05215	Cg03498;Cg05663;Cg05778;Cg06935;Cg07130;Cg08923;Cg09566;Cg09568;Cg09756;Cg11493;Cg13740;Cg13746;Cg15826;Cg16377;Cg16689;Cg16690;Cg17616;Cg18231;Cg18232;Cg19034;Cg19083;Cg19588;Cg19600;Cg19904;Cg20920;Cg22592;Cg22688;Cg25908;Cg26677;Cg27772;Cg28001;Cg28003;novel.241;novel.871;novel.2029;novel.2109;novel.2947;novel.4028	K04371+K00922+K02649+K07203+K00922+K06643+K23790+K23790+K04526+K04365+K04498+K04498+K04361+K02105+K02649+K02649+K04364+K04467+K04467+K01110+K04491+K06276+K02580+K04374+K02206+K07827+K07827+K04368+K04079+K04456+K04456+K04456+K06643+K06643+K02649+K02649+K02649+K04361
Human Diseases	Immune diseases	Rheumatoid arthritis	38	ko05323	Cg00256;Cg00257;Cg00258;Cg00259;Cg05321;Cg07998;Cg08933;Cg08935;Cg08940;Cg08944;Cg09922;Cg12839;Cg13884;Cg14358;Cg15609;Cg16466;Cg16881;Cg18447;Cg18698;Cg19706;Cg19972;Cg20027;Cg20437;Cg20734;Cg20823;Cg22481;Cg24433;Cg24434;Cg24495;Cg25595;Cg28265;novel.2172;novel.2257;novel.2259;novel.2708;novel.2709;novel.2710;novel.2712	K01365+K01365+K01365+K01365+K02146+K02150+K10159+K10160+K10159+K10159+K01365+K03662+K02155+K01365+K02152+K02145+K14379+K03661+K04448+K02154+K02154+K02144+K02154+K02151+K01365+K02148+K02147+K02147+K02147+K02153+K02149+K10160+K10160+K10159+K10159+K10159+K10159+K10159
Metabolism	Amino acid metabolism	Tyrosine metabolism	37	ko00350	Cg01300;Cg02300;Cg02301;Cg02302;Cg03954;Cg04300;Cg05206;Cg05207;Cg05421;Cg05957;Cg06772;Cg06773;Cg07310;Cg07361;Cg08270;Cg10344;Cg10346;Cg13230;Cg13510;Cg13704;Cg14123;Cg14520;Cg15721;Cg18249;Cg20387;Cg20388;Cg21894;Cg23306;Cg23628;Cg24607;Cg24642;Cg26581;Cg26869;Cg27509;Cg28415;Cg29344;novel.1802	K01555+K00503+K00503+K00503+K00815+K00457+K00505+K00505+K07253+K00505+K00503+K22329+K00451+K00501+K00505+K00503+K00503+K00276+K00503+K00503+K00503+K01593+K07253+K00274+K00505+K00505+K01593+K01557+K14454+K00274+K01557+K00505+K01800+K00274+K01557+K00505+K07253
Organismal Systems	Digestive system	Bile secretion	37	ko04976	Cg04628;Cg06472;Cg06494;Cg10984;Cg13295;Cg13296;Cg13297;Cg13298;Cg13299;Cg13300;Cg13301;Cg13305;Cg13307;Cg13308;Cg13310;Cg13314;Cg13315;Cg13316;Cg13748;Cg18444;Cg18445;Cg19929;Cg24235;Cg26206;Cg26997;Cg28530;Cg28632;Cg28633;Cg29094;Cg29252;Cg29348;Cg29349;Cg29689;Cg29733;Cg29856;Cg30599;novel.4127	K08042+K13885+K05658+K00489+K05673+K05673+K05673+K05673+K05673+K05673+K05673+K05673+K05673+K05673+K05673+K05673+K05673+K05673+K08049+K04345+K04345+K05681+K05673+K18245+K00021+K00659+K05683+K05684+K08041+K08045+K05658+K05658+K11822+K00659+K11822+K04588+K05673
Human Diseases	Cancers	Endometrial cancer	37	ko05213	Cg01198;Cg03498;Cg05663;Cg05775;Cg05778;Cg07130;Cg07863;Cg09517;Cg11493;Cg15826;Cg16377;Cg16689;Cg16690;Cg16971;Cg16973;Cg17616;Cg17671;Cg19034;Cg19083;Cg19366;Cg19391;Cg19393;Cg19397;Cg19588;Cg20608;Cg22592;Cg22688;Cg25908;Cg26771;Cg27772;Cg28001;Cg28003;Cg29244;novel.2029;novel.2109;novel.2947;novel.4028	K02085+K04371+K00922+K10140+K02649+K00922+K09408+K14021+K04365+K04361+K02105+K02649+K02649+K04402+K04402+K04364+K02157+K01110+K04491+K04377+K04402+K04402+K04402+K06276+K02159+K07827+K07827+K04368+K03511+K04456+K04456+K04456+K08734+K02649+K02649+K02649+K04361
Human Diseases	Cancers	Basal cell carcinoma	37	ko05217	Cg01198;Cg05072;Cg05775;Cg07033;Cg09245;Cg09302;Cg09517;Cg11693;Cg11831;Cg12066;Cg12985;Cg13409;Cg13416;Cg13417;Cg14664;Cg14667;Cg16189;Cg16190;Cg16191;Cg16192;Cg16377;Cg16971;Cg16973;Cg17671;Cg17915;Cg18579;Cg19083;Cg19391;Cg19393;Cg19397;Cg20608;Cg24725;Cg26409;Cg26472;Cg26771;Cg27918;novel.3834	K02085+K00408+K10140+K02353+K02354+K02842+K14021+K01558+K00572+K00182+K00444+K02432+K02432+K02432+K02375+K02375+K01064+K03209+K00445+K01357+K02105+K04402+K04402+K02157+K21283+K00714+K04491+K04402+K04402+K04402+K02159+K01384+K00444+K00444+K03511+K21283+K02432
Organismal Systems	Endocrine system	Regulation of lipolysis in adipocyte	36	ko04923	Cg04020;Cg04628;Cg05663;Cg05778;Cg07130;Cg09187;Cg09756;Cg10582;Cg10584;Cg13748;Cg14427;Cg14428;Cg14429;Cg14430;Cg15512;Cg15517;Cg15518;Cg16689;Cg16690;Cg18444;Cg18445;Cg19543;Cg20128;Cg20129;Cg27360;Cg27772;Cg28001;Cg28003;Cg28901;Cg29094;Cg29252;novel.2029;novel.2109;novel.2947;novel.4349;novel.4350	K04204+K08042+K00922+K02649+K00922+K16817+K04526+K01054+K01054+K08049+K16817+K16817+K16817+K16817+K11987+K11987+K11987+K02649+K02649+K04345+K04345+K04141+K16172+K16172+K04249+K04456+K04456+K04456+K01054+K08041+K08045+K02649+K02649+K02649+K11987+K11987
Human Diseases	Infectious diseases	Vibrio cholerae infection	36	ko05110	Cg04661;Cg05321;Cg05723;Cg05724;Cg05725;Cg07853;Cg07998;Cg12814;Cg12839;Cg13681;Cg13748;Cg13884;Cg14677;Cg15609;Cg16466;Cg17491;Cg17492;Cg17493;Cg17494;Cg17495;Cg18224;Cg18444;Cg18445;Cg18447;Cg19706;Cg19972;Cg20027;Cg20437;Cg20734;Cg22481;Cg24433;Cg24434;Cg24495;Cg25595;Cg28265;Cg30070	K07937+K02146+K01116+K01116+K01116+K07937+K02150+K10956+K03662+K05692+K08049+K02155+K09481+K02152+K02145+K07937+K07937+K07937+K07937+K07937+K02677+K04345+K04345+K03661+K02154+K02154+K02144+K02154+K02151+K02148+K02147+K02147+K02147+K02153+K02149+K07937
Human Diseases	Infectious diseases	Leishmaniasis	36	ko05140	Cg03498;Cg06855;Cg08933;Cg08935;Cg08940;Cg08944;Cg09233;Cg09739;Cg15512;Cg15517;Cg15518;Cg18698;Cg19540;Cg19600;Cg21558;Cg21691;Cg21692;Cg21693;Cg21694;Cg21982;Cg22409;Cg24018;Cg24912;Cg29310;Cg29483;Cg30237;Cg30238;novel.2172;novel.2257;novel.2259;novel.2708;novel.2709;novel.2710;novel.2712;novel.4349;novel.4350	K04371+K08009+K10159+K10160+K10159+K10159+K21421+K04427+K11987+K11987+K11987+K04448+K03175+K02580+K04447+K04447+K04447+K04447+K04447+K03231+K03175+K03231+K05719+K04447+K06483+K05719+K05719+K10160+K10160+K10159+K10159+K10159+K10159+K10159+K11987+K11987
Human Diseases	Cancers	Renal cell carcinoma	36	ko05211	Cg03498;Cg05025;Cg05663;Cg05778;Cg07130;Cg11493;Cg13740;Cg13746;Cg15715;Cg16689;Cg16690;Cg17154;Cg17288;Cg17616;Cg18252;Cg18617;Cg18698;Cg22592;Cg22688;Cg24609;Cg25834;Cg25908;Cg27201;Cg27772;Cg28001;Cg28003;Cg28112;Cg28522;Cg28655;Cg28657;Cg28688;Cg29665;Cg29837;novel.2029;novel.2109;novel.2947	K04371+K04393+K00922+K02649+K00922+K04365+K04498+K04498+K03868+K02649+K02649+K03872+K03872+K04364+K04392+K09594+K04448+K07827+K07827+K04392+K04393+K04368+K04393+K04456+K04456+K04456+K01679+K04393+K04393+K04392+K04393+K03870+K03870+K02649+K02649+K02649
Metabolism	Carbohydrate metabolism	Starch and sucrose metabolism	35	ko00500	Cg04918;Cg04919;Cg05695;Cg06506;Cg06524;Cg06525;Cg06526;Cg06801;Cg06802;Cg06803;Cg06825;Cg06826;Cg08239;Cg08640;Cg08849;Cg13192;Cg13936;Cg17518;Cg17574;Cg18289;Cg18290;Cg20113;Cg21758;Cg24445;Cg24560;Cg24577;Cg24837;Cg27899;Cg28102;Cg28103;Cg28104;Cg29242;Cg29243;novel.2059;novel.6096	K01176+K01176+K01179+K01179+K01810+K01810+K01810+K01179+K01179+K01179+K01179+K01179+K05349+K00688+K05349+K01194+K15779+K01196+K12316+K01835+K01835+K00693+K00700+K00844+K00844+K00844+K00750+K00688+K01179+K01179+K01179+K01176+K01176+K01084+K00844
Metabolism	Metabolism of cofactors and vitamins	Nicotinate and nicotinamide metabolism	35	ko00760	Cg03559;Cg04657;Cg05942;Cg06097;Cg07882;Cg07936;Cg09169;Cg09171;Cg09433;Cg09600;Cg11144;Cg16864;Cg17721;Cg17722;Cg17994;Cg18504;Cg18781;Cg19486;Cg20383;Cg21626;Cg21731;Cg23050;Cg23051;Cg23389;Cg23629;Cg24477;Cg24518;Cg24856;Cg26432;Cg26445;Cg28443;Cg28895;Cg29449;Cg29465;novel.1524	K06989+K00858+K01081+K11414+K19970+K19970+K19970+K19970+K03426+K01950+K03462+K11416+K11416+K11416+K11417+K11411+K00858+K01081+K00763+K11413+K00323+K18152+K18152+K01081+K03783+K01081+K01081+K06210+K11412+K11412+K11416+K10524+K11415+K11415+K00767
Genetic Information Processing	Folding, sorting and degradation	Proteasome	35	ko03050	Cg01189;Cg01216;Cg04972;Cg05030;Cg05386;Cg05507;Cg05907;Cg06148;Cg08478;Cg09515;Cg11108;Cg13155;Cg14067;Cg17614;Cg17782;Cg17791;Cg18171;Cg20506;Cg20559;Cg20761;Cg21861;Cg22282;Cg25240;Cg25324;Cg25970;Cg26744;Cg26950;Cg27207;Cg27709;Cg28643;Cg28719;Cg29976;Cg30440;novel.6521;novel.6522	K02736+K03030+K02737+K02738+K03061+K03061+K02731+K03038+K03039+K02725+K02729+K11599+K02739+K03030+K03035+K03065+K02734+K10881+K02726+K06700+K03028+K06691+K03032+K03029+K03062+K03031+K02728+K02730+K02727+K06699+K03064+K03036+K03066+K03033+K03033
Organismal Systems	Endocrine system	Parathyroid hormone synthesis, secretion and action	35	ko04928	Cg03498;Cg04628;Cg06987;Cg06988;Cg06990;Cg07485;Cg07486;Cg09475;Cg11493;Cg13748;Cg15826;Cg16641;Cg16726;Cg16731;Cg18224;Cg18444;Cg18445;Cg19904;Cg20955;Cg23508;Cg23509;Cg23521;Cg23522;Cg24627;Cg25908;Cg26811;Cg27311;Cg29094;Cg29252;Cg29529;Cg29589;Cg30076;Cg30077;novel.4028;novel.7481	K04371+K08042+K04513+K04513+K04513+K04585+K04585+K01115+K04365+K08049+K04361+K03068+K13293+K13293+K02677+K04345+K04345+K04374+K04585+K04439+K04439+K04439+K04439+K09203+K04368+K05858+K05858+K08041+K08045+K04585+K04585+K04585+K04585+K04361+K04585
Human Diseases	Cancers	Melanoma	35	ko05218	Cg03498;Cg05663;Cg05775;Cg05778;Cg07130;Cg08923;Cg09517;Cg11493;Cg12731;Cg12732;Cg12756;Cg12757;Cg15826;Cg16689;Cg16690;Cg16971;Cg16973;Cg19034;Cg19391;Cg19393;Cg19397;Cg20608;Cg22592;Cg22688;Cg25908;Cg26771;Cg27772;Cg28001;Cg28003;novel.241;novel.871;novel.2029;novel.2109;novel.2947;novel.4028	K04371+K00922+K10140+K02649+K00922+K06643+K14021+K04365+K09455+K09455+K09455+K09455+K04361+K02649+K02649+K04402+K04402+K01110+K04402+K04402+K04402+K02159+K07827+K07827+K04368+K03511+K04456+K04456+K04456+K06643+K06643+K02649+K02649+K02649+K04361
Metabolism	Lipid metabolism	Synthesis and degradation of ketone bodies	34	ko00072	Cg02329;Cg02330;Cg02332;Cg02345;Cg02363;Cg02366;Cg02371;Cg02374;Cg02687;Cg08698;Cg08701;Cg08702;Cg09831;Cg18535;Cg19419;Cg19845;Cg22082;Cg22083;Cg22137;Cg22207;Cg22208;Cg26612;Cg26613;novel.313;novel.484;novel.967;novel.1059;novel.1072;novel.2085;novel.2656;novel.4251;novel.4381;novel.4583;novel.6905	K00019+K00019+K00019+K00019+K00019+K00019+K00019+K00019+K00019+K00626+K00626+K00626+K00626+K01641+K00019+K01027+K00019+K00019+K01640+K00019+K00019+K00019+K00019+K00019+K00019+K00019+K00019+K00019+K00019+K00019+K00019+K00019+K00019+K00019
Metabolism	Glycan biosynthesis and metabolism	Other types of O-glycan biosynthesis	34	ko00514	Cg05310;Cg07167;Cg09807;Cg12476;Cg13343;Cg14323;Cg14431;Cg16136;Cg16436;Cg17087;Cg17575;Cg17900;Cg18228;Cg20092;Cg20093;Cg20094;Cg21485;Cg21568;Cg22785;Cg25443;Cg26868;Cg27397;Cg28345;Cg28512;Cg28802;Cg29298;Cg29347;Cg29715;Cg29827;Cg29887;Cg29888;Cg30261;Cg30454;Cg30474	K13675+K23800+K07966+K13667+K03691+K11703+K00710+K00710+K00728+K00710+K03691+K05948+K00731+K03691+K03691+K03691+K00731+K13676+K13676+K00731+K00728+K00710+K00710+K00710+K00710+K00731+K00731+K00710+K00710+K00710+K00710+K00710+K00710+K00710
Metabolism	Lipid metabolism	Biosynthesis of unsaturated fatty acids	34	ko01040	Cg03777;Cg12286;Cg15538;Cg15664;Cg16850;Cg17019;Cg17020;Cg17926;Cg17930;Cg18147;Cg18311;Cg18312;Cg19506;Cg19746;Cg20580;Cg21108;Cg21326;Cg21327;Cg21495;Cg21634;Cg21942;Cg22044;Cg26527;Cg27648;Cg28530;Cg28531;Cg28532;Cg28533;Cg28534;Cg28535;Cg29698;Cg29733;Cg29873;novel.4600	K00232+K00232+K10226+K10226+K08764+K00507+K00507+K10249+K10249+K08764+K10249+K10249+K10203+K10250+K00232+K00232+K10249+K10249+K10251+K10251+K00232+K10703+K10703+K10249+K00659+K01068+K01068+K01068+K01068+K01068+K07513+K00659+K07513+K10249
Organismal Systems	Endocrine system	PPAR signaling pathway	34	ko03320	Cg02438;Cg03744;Cg03745;Cg03777;Cg08641;Cg08689;Cg09411;Cg10550;Cg10984;Cg12286;Cg13639;Cg15205;Cg15206;Cg15538;Cg15640;Cg15664;Cg16850;Cg17019;Cg17020;Cg17973;Cg18147;Cg18535;Cg19181;Cg19588;Cg20580;Cg21108;Cg21375;Cg21942;Cg25028;Cg28268;Cg28963;Cg29698;Cg29873;novel.4576	K08765+K01596+K01596+K00232+K08765+K00029+K00029+K08766+K00489+K00232+K00864+K00864+K00864+K10226+K00249+K10226+K08764+K00507+K00507+K01897+K08764+K01641+K01897+K06276+K00232+K00232+K00255+K00232+K01897+K15013+K08765+K07513+K07513+K01897
Environmental Information Processing	Signal transduction	ErbB signaling pathway	34	ko04012	Cg03498;Cg05663;Cg05723;Cg05724;Cg05725;Cg05768;Cg05778;Cg06935;Cg07130;Cg11493;Cg13703;Cg15786;Cg15787;Cg15826;Cg16689;Cg16690;Cg17066;Cg17616;Cg17964;Cg18224;Cg18484;Cg18698;Cg19085;Cg19366;Cg22592;Cg22688;Cg25908;Cg27772;Cg28001;Cg28003;novel.2029;novel.2109;novel.2947;novel.4028	K04371+K00922+K01116+K01116+K01116+K04688+K02649+K07203+K00922+K04365+K04431+K04707+K04707+K04361+K02649+K02649+K07205+K04364+K04515+K02677+K04440+K04448+K05704+K04377+K07827+K07827+K04368+K04456+K04456+K04456+K02649+K02649+K02649+K04361
Organismal Systems	Development and regeneration	Axon regeneration	34	ko04361	Cg05137;Cg05663;Cg05768;Cg06935;Cg06987;Cg06988;Cg06990;Cg07130;Cg07863;Cg09100;Cg09104;Cg10028;Cg13508;Cg13703;Cg13748;Cg14520;Cg18252;Cg18342;Cg18444;Cg18445;Cg18481;Cg18484;Cg19034;Cg19716;Cg19962;Cg20359;Cg21455;Cg21894;Cg23477;Cg24021;Cg24609;Cg26811;Cg27311;Cg28657	K04163+K00922+K04688+K07203+K04513+K04513+K04513+K00922+K09408+K00901+K00901+K00502+K02599+K04431+K08049+K01593+K04392+K00901+K04345+K04345+K12494+K04440+K01110+K07198+K07198+K00901+K00901+K01593+K00901+K04163+K04392+K05858+K05858+K04392
Organismal Systems	Nervous system	Glutamatergic synapse	34	ko04724	Cg03498;Cg04628;Cg05372;Cg05373;Cg05521;Cg05522;Cg05523;Cg06788;Cg06842;Cg08445;Cg09475;Cg11434;Cg12645;Cg13748;Cg15519;Cg15577;Cg15578;Cg16806;Cg17749;Cg17970;Cg18224;Cg18444;Cg18445;Cg20758;Cg23851;Cg23852;Cg26811;Cg26965;Cg27196;Cg27311;Cg29094;Cg29252;novel.1810;novel.2572	K04371+K08042+K01915+K01915+K01915+K01915+K01915+K00910+K00910+K01915+K01115+K04606+K04610+K08049+K16342+K01915+K01915+K05213+K05210+K04348+K02677+K04345+K04345+K01425+K16342+K16342+K05858+K15010+K06268+K05858+K08041+K08045+K01915+K01915
Organismal Systems	Endocrine system	Ovarian Steroidogenesis	34	ko04913	Cg04628;Cg06352;Cg06472;Cg09756;Cg13748;Cg14072;Cg15512;Cg15517;Cg15518;Cg15519;Cg18444;Cg18445;Cg23851;Cg23852;Cg26094;Cg26095;Cg26624;Cg26625;Cg26626;Cg26628;Cg26629;Cg28531;Cg28532;Cg28533;Cg28534;Cg28535;Cg29094;Cg29252;Cg29544;Cg29548;Cg29551;Cg29554;novel.4349;novel.4350	K08042+K13373+K13885+K04526+K08049+K00461+K11987+K11987+K11987+K16342+K04345+K04345+K16342+K16342+K00461+K00461+K00461+K00461+K00461+K00461+K00461+K01068+K01068+K01068+K01068+K01068+K08041+K08045+K00461+K00461+K00461+K00461+K11987+K11987
Organismal Systems	Endocrine system	Adipocytokine signaling pathway	34	ko04920	Cg02438;Cg03744;Cg03745;Cg06935;Cg08641;Cg13241;Cg15522;Cg15579;Cg16839;Cg17973;Cg18231;Cg18232;Cg18484;Cg19181;Cg19600;Cg19716;Cg19962;Cg20128;Cg20129;Cg21558;Cg21691;Cg21692;Cg21693;Cg21694;Cg25028;Cg26844;Cg27772;Cg28001;Cg28003;Cg28268;Cg28963;Cg29310;novel.2059;novel.4576	K08765+K01596+K01596+K07203+K08765+K03173+K03173+K07298+K07298+K01897+K04467+K04467+K04440+K01897+K02580+K07198+K07198+K16172+K16172+K04447+K04447+K04447+K04447+K04447+K01897+K07199+K04456+K04456+K04456+K15013+K08765+K04447+K01084+K01897
Human Diseases	Cancers	Non-small cell lung cancer	34	ko05223	Cg03498;Cg05663;Cg05723;Cg05724;Cg05725;Cg05775;Cg05778;Cg07130;Cg07863;Cg09517;Cg11493;Cg15826;Cg16689;Cg16690;Cg16971;Cg16973;Cg17616;Cg18224;Cg19391;Cg19393;Cg19397;Cg19588;Cg20608;Cg22592;Cg22688;Cg25908;Cg26771;Cg27772;Cg28001;Cg28003;novel.2029;novel.2109;novel.2947;novel.4028	K04371+K00922+K01116+K01116+K01116+K10140+K02649+K00922+K09408+K14021+K04365+K04361+K02649+K02649+K04402+K04402+K04364+K02677+K04402+K04402+K04402+K06276+K02159+K07827+K07827+K04368+K03511+K04456+K04456+K04456+K02649+K02649+K02649+K04361
Genetic Information Processing	Replication and repair	DNA replication	33	ko03030	Cg03848;Cg04741;Cg05821;Cg05987;Cg06521;Cg06546;Cg06733;Cg10472;Cg13408;Cg13642;Cg13890;Cg13913;Cg14146;Cg16503;Cg17171;Cg17302;Cg17958;Cg18965;Cg19637;Cg22124;Cg22237;Cg23209;Cg23451;Cg23533;Cg23816;Cg24299;Cg24304;Cg24900;Cg26831;Cg27308;Cg27367;Cg27490;Cg28113	K10756+K03505+K10755+K10742+K10747+K04799+K02212+K02540+K02685+K02324+K10756+K10740+K02684+K02326+K02685+K02685+K04802+K03469+K10747+K10754+K02327+K10755+K03504+K10743+K10744+K02320+K02320+K02210+K10745+K02321+K02325+K03506+K02328
Human Diseases	Substance dependence	Morphine addiction	33	ko05032	Cg04628;Cg06788;Cg06842;Cg09694;Cg13118;Cg13268;Cg13509;Cg13511;Cg13748;Cg14227;Cg14244;Cg14946;Cg15124;Cg16726;Cg16731;Cg16746;Cg16751;Cg16802;Cg18224;Cg18444;Cg18445;Cg19186;Cg21351;Cg21900;Cg23508;Cg23509;Cg23521;Cg23522;Cg23604;Cg24355;Cg28242;Cg29094;Cg29252	K08042+K00910+K00910+K19021+K13755+K05185+K05175+K05181+K08049+K18283+K05175+K05186+K18438+K13293+K13293+K18438+K18438+K18436+K02677+K04345+K04345+K13298+K13298+K04615+K04439+K04439+K04439+K04439+K04144+K08291+K18437+K08041+K08045
Metabolism	Metabolism of other amino acids	beta-Alanine metabolism	32	ko00410	Cg03777;Cg04175;Cg05990;Cg09125;Cg09584;Cg10399;Cg12286;Cg13230;Cg15157;Cg16882;Cg17949;Cg18175;Cg19316;Cg20580;Cg20689;Cg21108;Cg21942;Cg21951;Cg21952;Cg22049;Cg22602;Cg22603;Cg22604;Cg22698;Cg22699;Cg23216;Cg24810;Cg27025;Cg27791;Cg28024;Cg29989;novel.4590	K00232+K00248+K01431+K00128+K01578+K13524+K00232+K00276+K01580+K07515+K07511+K00207+K13524+K00232+K01464+K00232+K00232+K12259+K12259+K05605+K08660+K08660+K08660+K08660+K08660+K12259+K12259+K14085+K00128+K00128+K00149+K00207
Cellular Processes	Cell growth and death	p53 signaling pathway	32	ko04115	Cg05775;Cg06174;Cg08923;Cg09611;Cg14309;Cg16971;Cg16973;Cg17061;Cg17163;Cg17296;Cg18551;Cg19034;Cg19391;Cg19393;Cg19397;Cg20608;Cg20920;Cg26330;Cg26332;Cg26767;Cg27649;Cg27650;Cg28875;Cg28877;Cg28878;Cg28879;Cg29192;Cg29193;Cg29286;novel.241;novel.871;novel.6636	K10140+K05868+K06643+K10151+K10143+K04402+K04402+K10144+K10808+K10808+K07207+K01110+K04402+K04402+K04402+K02159+K02206+K02187+K02187+K21770+K04570+K04570+K06640+K06640+K06640+K06640+K04570+K04570+K04570+K06643+K06643+K06640
Environmental Information Processing	Signal transduction	Jak-STAT signaling pathway	32	ko04630	Cg05663;Cg05778;Cg06935;Cg07130;Cg09611;Cg13740;Cg13746;Cg15826;Cg16689;Cg16690;Cg17616;Cg19366;Cg21558;Cg21591;Cg21691;Cg21692;Cg21693;Cg21694;Cg27254;Cg27649;Cg27650;Cg27772;Cg28001;Cg28003;Cg29192;Cg29193;Cg29286;Cg29310;novel.2029;novel.2109;novel.2947;novel.4028	K00922+K02649+K07203+K00922+K10151+K04498+K04498+K04361+K02649+K02649+K04364+K04377+K04447+K04705+K04447+K04447+K04447+K04447+K16064+K04570+K04570+K04456+K04456+K04456+K04570+K04570+K04570+K04447+K02649+K02649+K02649+K04361
Organismal Systems	Immune system	Leukocyte transendothelial migration	32	ko04670	Cg05025;Cg05663;Cg05723;Cg05724;Cg05725;Cg05778;Cg06855;Cg06987;Cg06988;Cg06990;Cg07130;Cg09233;Cg13681;Cg16377;Cg16689;Cg16690;Cg18224;Cg18252;Cg24609;Cg24912;Cg25834;Cg27201;Cg28522;Cg28655;Cg28657;Cg28688;Cg29483;Cg30237;Cg30238;novel.2029;novel.2109;novel.2947	K04393+K00922+K01116+K01116+K01116+K02649+K08009+K04513+K04513+K04513+K00922+K21421+K05692+K02105+K02649+K02649+K02677+K04392+K04392+K05719+K04393+K04393+K04393+K04393+K04392+K04393+K06483+K05719+K05719+K02649+K02649+K02649
Metabolism	Carbohydrate metabolism	Citrate cycle (TCA cycle)	31	ko00020	Cg02900;Cg03164;Cg03744;Cg03745;Cg03833;Cg04728;Cg05394;Cg05500;Cg08189;Cg09682;Cg10516;Cg11072;Cg11903;Cg12107;Cg13423;Cg16542;Cg17673;Cg21730;Cg21775;Cg21905;Cg22558;Cg22649;Cg23241;Cg23384;Cg24405;Cg26337;Cg26595;Cg28112;Cg28172;Cg28791;Cg30689	K01681+K01681+K01596+K01596+K00235+K00026+K01676+K01676+K00161+K01648+K00030+K00382+K00162+K01900+K00236+K00030+K00164+K00031+K00234+K00031+K00627+K00627+K01900+K00237+K01899+K00030+K01958+K01679+K00658+K00025+K01647
Organismal Systems	Immune system	IL-17 signaling pathway	31	ko04657	Cg03498;Cg03621;Cg04518;Cg04547;Cg09739;Cg10720;Cg10724;Cg10730;Cg10736;Cg10739;Cg12265;Cg12266;Cg12848;Cg12849;Cg13241;Cg15512;Cg15517;Cg15518;Cg15522;Cg18231;Cg18232;Cg18484;Cg18698;Cg19540;Cg19600;Cg22409;Cg26330;Cg26332;Cg26677;novel.4349;novel.4350	K04371+K03352+K12890+K12890+K04427+K05410+K05410+K05410+K05410+K05410+K05410+K05410+K05410+K05410+K03173+K11987+K11987+K11987+K03173+K04467+K04467+K04440+K04448+K03175+K02580+K03175+K02187+K02187+K04079+K11987+K11987
Organismal Systems	Nervous system	GABAergic synapse	31	ko04727	Cg04628;Cg04873;Cg05372;Cg05373;Cg05521;Cg05522;Cg05523;Cg06469;Cg08445;Cg10399;Cg13268;Cg13509;Cg13511;Cg13748;Cg14244;Cg14946;Cg15157;Cg15577;Cg15578;Cg18224;Cg18444;Cg18445;Cg19085;Cg19316;Cg20758;Cg21900;Cg28751;Cg29094;Cg29252;novel.1810;novel.2572	K08042+K08341+K01915+K01915+K01915+K01915+K01915+K08341+K01915+K13524+K05185+K05175+K05181+K08049+K05175+K05186+K01580+K01915+K01915+K02677+K04345+K04345+K05704+K13524+K01425+K04615+K15376+K08041+K08045+K01915+K01915
Human Diseases	Cancers	Transcriptional misregulation in cancers	31	ko05202	Cg05775;Cg08923;Cg09517;Cg09611;Cg11693;Cg12731;Cg12732;Cg12756;Cg12757;Cg16971;Cg16973;Cg17639;Cg18024;Cg18151;Cg19366;Cg19391;Cg19393;Cg19397;Cg19549;Cg19600;Cg20608;Cg21484;Cg26771;Cg27280;Cg27649;Cg27650;Cg29192;Cg29193;Cg29286;novel.241;novel.871	K10140+K06643+K14021+K10151+K01558+K09455+K09455+K09455+K09455+K04402+K04402+K11427+K17693+K06067+K04377+K04402+K04402+K04402+K12823+K02580+K02159+K15618+K03511+K00717+K04570+K04570+K04570+K04570+K04570+K06643+K06643
Metabolism	Glycan biosynthesis and metabolism	Mucin type O-glycan biosynthesis	30	ko00512	Cg05981;Cg07490;Cg08727;Cg08728;Cg08729;Cg08730;Cg08731;Cg08732;Cg13636;Cg14431;Cg16136;Cg16369;Cg17087;Cg18228;Cg20343;Cg21485;Cg25443;Cg27397;Cg28345;Cg28512;Cg28802;Cg29298;Cg29347;Cg29715;Cg29827;Cg29887;Cg29888;Cg30261;Cg30454;Cg30474	K09662+K00727+K00727+K00727+K00727+K00727+K00727+K00727+K00727+K00710+K00710+K09662+K00710+K00731+K09662+K00731+K00731+K00710+K00710+K00710+K00710+K00731+K00731+K00710+K00710+K00710+K00710+K00710+K00710+K00710
Metabolism	Carbohydrate metabolism	Propanoate metabolism	30	ko00640	Cg03777;Cg04175;Cg08698;Cg08701;Cg08702;Cg09584;Cg09831;Cg10040;Cg10399;Cg11072;Cg12107;Cg12286;Cg16796;Cg16804;Cg16882;Cg17949;Cg19316;Cg20580;Cg21108;Cg21942;Cg22049;Cg22478;Cg23241;Cg23835;Cg24380;Cg24405;Cg26056;Cg26748;Cg30193;Cg30209	K00232+K00248+K00626+K00626+K00626+K01578+K00626+K00167+K13524+K00382+K01900+K00232+K09699+K01895+K07515+K07511+K13524+K00232+K00232+K00232+K05605+K01908+K01900+K01965+K01966+K01899+K00166+K01895+K01847+K01847
Organismal Systems	Endocrine system	Prolactin signaling pathway	30	ko04917	Cg03498;Cg05663;Cg05778;Cg07130;Cg07361;Cg07863;Cg09611;Cg09756;Cg16689;Cg16690;Cg17616;Cg18484;Cg19085;Cg19600;Cg21558;Cg21691;Cg21692;Cg21693;Cg21694;Cg22592;Cg22688;Cg25908;Cg26333;Cg27772;Cg28001;Cg28003;Cg29310;novel.2029;novel.2109;novel.2947	K04371+K00922+K02649+K00922+K00501+K09408+K10151+K04526+K02649+K02649+K04364+K04440+K05704+K02580+K04447+K04447+K04447+K04447+K04447+K07827+K07827+K04368+K00965+K04456+K04456+K04456+K04447+K02649+K02649+K02649
Metabolism	Carbohydrate metabolism	Fructose and mannose metabolism	29	ko00051	Cg04089;Cg04140;Cg04748;Cg05445;Cg05774;Cg07002;Cg08151;Cg09456;Cg09457;Cg10096;Cg10398;Cg10746;Cg13897;Cg14817;Cg17036;Cg18819;Cg19074;Cg19516;Cg20068;Cg24371;Cg24445;Cg24560;Cg24577;Cg25923;Cg26969;Cg27273;Cg28153;novel.1445;novel.6096	K00846+K00846+K01623+K05305+K01803+K01711+K02377+K14634+K14634+K00008+K00966+K12661+K00976+K00966+K17497+K18334+K01805+K12661+K00850+K19355+K00844+K00844+K00844+K00008+K00008+K03841+K00863+K05305+K00844
Metabolism	Metabolism of cofactors and vitamins	Folate biosynthesis	29	ko00790	Cg01716;Cg04289;Cg04291;Cg04292;Cg04464;Cg04465;Cg04466;Cg04469;Cg04470;Cg04801;Cg04802;Cg06804;Cg06824;Cg07361;Cg07773;Cg09162;Cg09409;Cg10028;Cg13702;Cg14468;Cg14843;Cg21759;Cg22153;Cg23550;Cg25018;Cg26515;Cg27470;Cg28226;Cg28751	K00287+K01077+K01077+K01077+K00079+K00079+K00079+K00079+K00079+K01077+K01077+K01077+K01077+K00501+K00500+K00500+K20967+K00502+K01930+K01724+K01077+K15631+K00079+K00072+K00357+K01307+K01495+K03635+K15376
Organismal Systems	Immune system	Natural killer cell mediated cytotoxicity	29	ko04650	Cg03498;Cg05663;Cg05723;Cg05724;Cg05725;Cg05778;Cg07130;Cg11493;Cg16689;Cg16690;Cg17616;Cg17970;Cg18224;Cg18252;Cg22592;Cg22688;Cg24552;Cg24609;Cg24942;Cg25025;Cg25908;Cg26330;Cg26332;Cg27196;Cg28657;novel.2029;novel.2109;novel.2947;novel.5824	K04371+K00922+K01116+K01116+K01116+K02649+K00922+K04365+K02649+K02649+K04364+K04348+K02677+K04392+K07827+K07827+K04721+K04392+K04389+K04721+K04368+K02187+K02187+K06268+K04392+K02649+K02649+K02649+K04721
Metabolism	Carbohydrate metabolism	Pentose phosphate pathway	28	ko00030	Cg01192;Cg01193;Cg01194;Cg04748;Cg05406;Cg06524;Cg06525;Cg06526;Cg09581;Cg11875;Cg11911;Cg11912;Cg13024;Cg13753;Cg13936;Cg14182;Cg15753;Cg18289;Cg18290;Cg18593;Cg18601;Cg20068;Cg22224;Cg22476;Cg26524;Cg26943;Cg27273;Cg27631	K00615+K00615+K00615+K01623+K00033+K01810+K01810+K01810+K00616+K00615+K11529+K11529+K00036+K00948+K15779+K01057+K01807+K01835+K01835+K01053+K01053+K00850+K01783+K13937+K01619+K00851+K03841+K00852
Metabolism	Amino acid metabolism	Histidine metabolism	28	ko00340	Cg00380;Cg01163;Cg09125;Cg11825;Cg11919;Cg12036;Cg18249;Cg22602;Cg22603;Cg22604;Cg22698;Cg22699;Cg22769;Cg22770;Cg22772;Cg24607;Cg25725;Cg27025;Cg27227;Cg27509;Cg27791;Cg28024;Cg28447;Cg29571;Cg29989;Cg30487;Cg30539;Cg30540	K01590+K19787+K00128+K01712+K01745+K01468+K00274+K08660+K08660+K08660+K08660+K08660+K20247+K20247+K20247+K00274+K11182+K14085+K11182+K00274+K00128+K00128+K11182+K13990+K00149+K11182+K11182+K11182
Metabolism	Energy metabolism	Nitrogen metabolism	28	ko00910	Cg03563;Cg03564;Cg03808;Cg05372;Cg05373;Cg05521;Cg05522;Cg05523;Cg05956;Cg06579;Cg08445;Cg15577;Cg15578;Cg19276;Cg19306;Cg20833;Cg20910;Cg24426;Cg24427;Cg24428;Cg24500;Cg26205;Cg26206;Cg29690;Cg30061;novel.1810;novel.2572;novel.6160	K01672+K01672+K01672+K01915+K01915+K01915+K01915+K01915+K01672+K01672+K01915+K01915+K01915+K01672+K01672+K01672+K01672+K01672+K01672+K01672+K01672+K01672+K18245+K01672+K01672+K01915+K01915+K01672
Metabolism	Lipid metabolism	alpha-Linolenic acid metabolism	27	ko00592	Cg03777;Cg04180;Cg04551;Cg05941;Cg06207;Cg06208;Cg09187;Cg09695;Cg12286;Cg14427;Cg14428;Cg14429;Cg14430;Cg15519;Cg15538;Cg15664;Cg19823;Cg20580;Cg21108;Cg21942;Cg23851;Cg23852;Cg25969;Cg29698;Cg29873;Cg30414;novel.1849	K00232+K01047+K01047+K01047+K01047+K01047+K16817+K01047+K00232+K16817+K16817+K16817+K16817+K16342+K10226+K10226+K01047+K00232+K00232+K00232+K16342+K16342+K14621+K07513+K07513+K14621+K01047
Cellular Processes	Transport and catabolism	Autophagy - other eukaryotes	27	ko04136	Cg04873;Cg05309;Cg06469;Cg06935;Cg07103;Cg09535;Cg12749;Cg12773;Cg13708;Cg15296;Cg15849;Cg15897;Cg17011;Cg17043;Cg17531;Cg17557;Cg19649;Cg19756;Cg20715;Cg23060;Cg24672;Cg24832;Cg28406;Cg28479;Cg29292;Cg29295;novel.7001	K08341+K08269+K08341+K07203+K08333+K08339+K08337+K08337+K08334+K08331+K19730+K19730+K07204+K08266+K08342+K17888+K08336+K04382+K17606+K08343+K08342+K17890+K00914+K17906+K17907+K17907+K17907
Organismal Systems	Immune system	Toll and Imd signaling pathway	27	ko04624	Cg07344;Cg07346;Cg07352;Cg07358;Cg07363;Cg07365;Cg07368;Cg07641;Cg07898;Cg07899;Cg07900;Cg07910;Cg07911;Cg08212;Cg09085;Cg09336;Cg09739;Cg12252;Cg13703;Cg17098;Cg18484;Cg18698;Cg19600;Cg23993;novel.2025;novel.2070;novel.2071	K16060+K16060+K16060+K16060+K16060+K16060+K16060+K16060+K16060+K16060+K16060+K16060+K16060+K16060+K16060+K16060+K04427+K10580+K04431+K06689+K04440+K04448+K02580+K03362+K16060+K16060+K16060
Metabolism	Lipid metabolism	Fatty acid elongation	26	ko00062	Cg09310;Cg09311;Cg15423;Cg16882;Cg16883;Cg17926;Cg17930;Cg17949;Cg18311;Cg18312;Cg19460;Cg19506;Cg19746;Cg21326;Cg21327;Cg21495;Cg21634;Cg22044;Cg26527;Cg27648;Cg28531;Cg28532;Cg28533;Cg28534;Cg28535;novel.4600	K07512+K07512+K01074+K07515+K07509+K10249+K10249+K07511+K10249+K10249+K00022+K10203+K10250+K10249+K10249+K10251+K10251+K10703+K10703+K10249+K01068+K01068+K01068+K01068+K01068+K10249
Metabolism	Glycan biosynthesis and metabolism	Glycosylphosphatidylinositol(GPI)-anchor biosynthesis	26	ko00563	Cg05605;Cg05802;Cg06522;Cg06714;Cg06856;Cg06949;Cg07424;Cg15530;Cg16541;Cg16861;Cg17837;Cg17840;Cg18077;Cg18078;Cg18174;Cg18969;Cg18987;Cg19652;Cg21490;Cg24643;Cg26329;Cg26331;Cg26752;Cg27883;Cg27884;novel.4662	K05284+K03857+K05289+K05293+K05285+K05292+K08098+K03859+K05290+K05310+K05294+K05294+K03860+K03860+K05286+K01127+K01127+K07541+K07542+K05291+K05288+K05288+K03858+K05287+K05287+K01127
Organismal Systems	Immune system	Th1 and Th2 cell differentiation	26	ko04658	Cg03498;Cg05145;Cg05148;Cg05723;Cg05724;Cg05725;Cg08677;Cg13034;Cg13508;Cg13900;Cg13907;Cg17970;Cg18231;Cg18232;Cg18484;Cg18698;Cg19600;Cg21558;Cg21691;Cg21692;Cg21693;Cg21694;Cg22913;Cg27196;Cg28200;Cg29310	K04371+K06051+K06051+K01116+K01116+K01116+K21635+K06051+K02599+K06051+K06061+K04348+K04467+K04467+K04440+K04448+K02580+K04447+K04447+K04447+K04447+K04447+K06053+K06268+K06052+K04447
Organismal Systems	Immune system	B cell receptor signaling pathway	26	ko04662	Cg03498;Cg05663;Cg05778;Cg07130;Cg16689;Cg16690;Cg17616;Cg17970;Cg18231;Cg18232;Cg18252;Cg18698;Cg19600;Cg22592;Cg22688;Cg24609;Cg24831;Cg25908;Cg27196;Cg27772;Cg28001;Cg28003;Cg28657;novel.2029;novel.2109;novel.2947	K04371+K00922+K02649+K00922+K02649+K02649+K04364+K04348+K04467+K04467+K04392+K04448+K02580+K07827+K07827+K04392+K15909+K04368+K06268+K04456+K04456+K04456+K04392+K02649+K02649+K02649
Human Diseases	Neurodegenerative diseases	Amyotrophic lateral sclerosis (ALS)	26	ko05014	Cg04186;Cg04261;Cg08305;Cg08594;Cg10025;Cg10026;Cg17749;Cg17970;Cg18252;Cg18339;Cg18707;Cg19453;Cg20608;Cg24609;Cg26330;Cg26332;Cg26687;Cg27196;Cg27649;Cg27650;Cg28657;Cg29192;Cg29193;Cg29286;novel.1764;novel.6994	K11519+K13240+K04565+K00432+K03781+K03781+K05210+K04348+K04392+K00432+K00432+K00432+K02159+K04392+K02187+K02187+K00432+K06268+K04570+K04570+K04392+K04570+K04570+K04570+K00432+K04565
Environmental Information Processing	Signal transduction	MAPK signaling pathway - fly	25	ko04013	Cg03498;Cg09263;Cg09739;Cg11493;Cg13703;Cg15826;Cg17098;Cg17616;Cg18223;Cg18252;Cg18484;Cg18698;Cg19085;Cg19540;Cg19756;Cg22409;Cg22592;Cg22688;Cg23480;Cg24609;Cg25908;Cg26708;Cg27011;Cg28657;novel.4028	K04371+K04564+K04427+K04365+K04431+K04361+K06689+K04364+K13578+K04392+K04440+K04448+K05704+K03175+K04382+K03175+K07827+K07827+K04508+K04392+K04368+K14290+K04497+K04392+K04361
Genetic Information Processing	Folding, sorting and degradation	SNARE interactions in vesicular transport	25	ko04130	Cg03606;Cg04363;Cg05890;Cg05910;Cg06848;Cg13382;Cg13433;Cg14396;Cg14631;Cg15631;Cg16441;Cg16744;Cg17254;Cg17414;Cg17448;Cg17901;Cg18101;Cg20512;Cg22305;Cg24307;Cg24626;Cg26411;Cg26444;Cg26469;Cg28145	K08489+K08495+K08510+K04560+K08509+K08504+K08515+K08513+K08517+K08491+K08498+K08488+K08493+K08516+K08493+K08501+K08515+K08504+K08496+K08492+K08516+K08507+K08493+K08507+K08490
Human Diseases	Cancers	Acute myeloid leukemia	25	ko05221	Cg03498;Cg05663;Cg05768;Cg05778;Cg06935;Cg07130;Cg11493;Cg16689;Cg16690;Cg17066;Cg17616;Cg18231;Cg18232;Cg19083;Cg19366;Cg19600;Cg22592;Cg22688;Cg25908;Cg27772;Cg28001;Cg28003;novel.2029;novel.2109;novel.2947	K04371+K00922+K04688+K02649+K07203+K00922+K04365+K02649+K02649+K07205+K04364+K04467+K04467+K04491+K04377+K02580+K07827+K07827+K04368+K04456+K04456+K04456+K02649+K02649+K02649
Cellular Processes	Cell growth and death	Apoptosis - fly	24	ko04214	Cg03498;Cg05650;Cg09739;Cg10084;Cg11493;Cg13703;Cg15826;Cg18464;Cg18484;Cg18698;Cg19540;Cg19631;Cg19904;Cg22409;Cg22592;Cg22688;Cg26856;Cg26905;Cg28875;Cg28877;Cg28878;Cg28879;novel.4028;novel.6636	K04371+K06030+K04427+K05770+K04365+K04431+K04361+K10586+K04440+K04448+K03175+K07870+K04374+K03175+K07827+K07827+K03262+K24070+K06640+K06640+K06640+K06640+K04361+K06640
Organismal Systems	Immune system	Cytosolic DNA-sensing pathway	24	ko04623	Cg09319;Cg10720;Cg10724;Cg10730;Cg10736;Cg10739;Cg11373;Cg12265;Cg12266;Cg12848;Cg12849;Cg14034;Cg16940;Cg17865;Cg18202;Cg18231;Cg18232;Cg18314;Cg19600;Cg22380;Cg25940;Cg28190;Cg28214;Cg28227	K03014+K05410+K05410+K05410+K05410+K05410+K03020+K05410+K05410+K05410+K05410+K03016+K03026+K03022+K14721+K04467+K04467+K03018+K02580+K03019+K03025+K03027+K03024+K03023
Organismal Systems	Nervous system	Synaptic vesicle cycle	24	ko04721	Cg04318;Cg05321;Cg05910;Cg06769;Cg07998;Cg13656;Cg13884;Cg15609;Cg16466;Cg18447;Cg19706;Cg19972;Cg20027;Cg20437;Cg20734;Cg21656;Cg22383;Cg22481;Cg24433;Cg24434;Cg24495;Cg25595;Cg28191;Cg28265	K04646+K02146+K04560+K11826+K02150+K01528+K02155+K02152+K02145+K03661+K02154+K02154+K02144+K02154+K02151+K11824+K04644+K02148+K02147+K02147+K02147+K02153+K11827+K02149
Organismal Systems	Endocrine system	GnRH secretion	24	ko04929	Cg03498;Cg05663;Cg05778;Cg07130;Cg16689;Cg16690;Cg18224;Cg21900;Cg22592;Cg22688;Cg23508;Cg23509;Cg23521;Cg23522;Cg25908;Cg26811;Cg27311;Cg27772;Cg28001;Cg28003;Cg30001;novel.2029;novel.2109;novel.2947	K04371+K00922+K02649+K00922+K02649+K02649+K02677+K04615+K07827+K07827+K04439+K04439+K04439+K04439+K04368+K05858+K05858+K04456+K04456+K04456+K08374+K02649+K02649+K02649
Organismal Systems	Digestive system	Cholesterol metabolism	24	ko04979	Cg05569;Cg06472;Cg08982;Cg10084;Cg10984;Cg12258;Cg12971;Cg16812;Cg17174;Cg17304;Cg17306;Cg18021;Cg19005;Cg22365;Cg22366;Cg22367;Cg24370;Cg28141;Cg28142;Cg28143;Cg28144;Cg28632;Cg28633;Cg30043	K01052+K13885+K01052+K05770+K00489+K13443+K12388+K12385+K05641+K05641+K05641+K12385+K05641+K12385+K12385+K12385+K13443+K13443+K13443+K13443+K13443+K05683+K05684+K00637
Metabolism	Metabolism of terpenoids and polyketides	Terpenoid backbone biosynthesis	23	ko00900	Cg05509;Cg05655;Cg06276;Cg08698;Cg08701;Cg08702;Cg09583;Cg09746;Cg09831;Cg09870;Cg18485;Cg18535;Cg19582;Cg21720;Cg22191;Cg25221;Cg25793;Cg26728;Cg26729;Cg26997;Cg28208;Cg29250;novel.1808	K00587+K00869+K01597+K00626+K00626+K00626+K12505+K11778+K00626+K19177+K15889+K01641+K00804+K05906+K12504+K05955+K05954+K08658+K08658+K00021+K13273+K01823+K00587
Organismal Systems	Excretory system	Endocrine and other factor-regulated calcium reabsorption	23	ko04961	Cg01503;Cg02037;Cg04318;Cg06769;Cg07485;Cg07486;Cg13656;Cg13748;Cg18224;Cg18444;Cg18445;Cg20252;Cg20955;Cg21656;Cg22383;Cg26811;Cg27311;Cg28191;Cg29529;Cg29589;Cg30076;Cg30077;novel.7481	K07904+K07904+K04646+K11826+K04585+K04585+K01528+K08049+K02677+K04345+K04345+K07904+K04585+K11824+K04644+K05858+K05858+K11827+K04585+K04585+K04585+K04585+K04585
Metabolism	Metabolism of cofactors and vitamins	One carbon pool by folate	22	ko00670	Cg00287;Cg00318;Cg01716;Cg03775;Cg05129;Cg09620;Cg11198;Cg12192;Cg18107;Cg19509;Cg20228;Cg20718;Cg21308;Cg22107;Cg27426;Cg28146;Cg28147;Cg28150;Cg28167;Cg29571;novel.3014;novel.4861	K00604+K00604+K00287+K11787+K00297+K00560+K00289+K00605+K13403+K00600+K00548+K00600+K00548+K00602+K01934+K00548+K00548+K00548+K00288+K13990+K00289+K13403
Genetic Information Processing	Transcription	RNA polymerase	22	ko03020	Cg05612;Cg07270;Cg09319;Cg11373;Cg13179;Cg14034;Cg16135;Cg16940;Cg17865;Cg18202;Cg18314;Cg22380;Cg22554;Cg22645;Cg24619;Cg25223;Cg25940;Cg27157;Cg28190;Cg28214;Cg28227;Cg28851	K03011+K03008+K03014+K03020+K03000+K03016+K03005+K03026+K03022+K14721+K03018+K03019+K03012+K03012+K03006+K03010+K03025+K03015+K03027+K03024+K03023+K03017
Genetic Information Processing	Folding, sorting and degradation	Protein export	22	ko03060	Cg02262;Cg03311;Cg04568;Cg05132;Cg05197;Cg06928;Cg07896;Cg12579;Cg12814;Cg13147;Cg13413;Cg14250;Cg14529;Cg14677;Cg19675;Cg20000;Cg20798;Cg23857;Cg24989;Cg26529;Cg28165;novel.6716	K13280+K03105+K12272+K12946+K03217+K12275+K09540+K09648+K10956+K09490+K13431+K12948+K09490+K09481+K03107+K03107+K09490+K12947+K03108+K03104+K03106+K03109
Organismal Systems	Immune system	RIG-I-like receptor signaling pathway	22	ko04622	Cg09535;Cg09739;Cg10720;Cg10724;Cg10730;Cg10736;Cg10739;Cg12265;Cg12266;Cg12848;Cg12849;Cg13241;Cg15522;Cg18231;Cg18232;Cg18426;Cg18484;Cg19540;Cg19600;Cg19649;Cg22409;Cg28153	K08339+K04427+K05410+K05410+K05410+K05410+K05410+K05410+K05410+K05410+K05410+K03173+K03173+K04467+K04467+K04416+K04440+K03175+K02580+K08336+K03175+K00863
Organismal Systems	Immune system	Th17 cell differentiation	22	ko04659	Cg01320;Cg02695;Cg03498;Cg05723;Cg05724;Cg05725;Cg06935;Cg13270;Cg17970;Cg18231;Cg18232;Cg18484;Cg18698;Cg19600;Cg21558;Cg21691;Cg21692;Cg21693;Cg21694;Cg26677;Cg27196;Cg29310	K23605+K04501+K04371+K01116+K01116+K01116+K07203+K04674+K04348+K04467+K04467+K04440+K04448+K02580+K04447+K04447+K04447+K04447+K04447+K04079+K06268+K04447
Organismal Systems	Endocrine system	Thyroid hormone synthesis	22	ko04918	Cg04628;Cg08594;Cg13147;Cg13748;Cg14077;Cg14529;Cg18224;Cg18339;Cg18444;Cg18445;Cg18707;Cg19453;Cg19904;Cg20798;Cg25044;Cg26687;Cg26811;Cg27311;Cg27360;Cg29094;Cg29252;novel.1764	K08042+K00432+K09490+K08049+K08054+K09490+K02677+K00432+K04345+K04345+K00432+K00432+K04374+K09490+K00383+K00432+K05858+K05858+K04249+K08041+K08045+K00432
Organismal Systems	Digestive system	Carbohydrate digestion and absorption	22	ko04973	Cg04918;Cg04919;Cg05663;Cg05778;Cg07130;Cg16689;Cg16690;Cg24445;Cg24560;Cg24577;Cg26811;Cg27311;Cg27772;Cg28001;Cg28003;Cg29242;Cg29243;novel.2029;novel.2059;novel.2109;novel.2947;novel.6096	K01176+K01176+K00922+K02649+K00922+K02649+K02649+K00844+K00844+K00844+K05858+K05858+K04456+K04456+K04456+K01176+K01176+K02649+K01084+K02649+K02649+K00844
Human Diseases	Cardiovascular diseases	Dilated cardiomyopathy (DCM)	22	ko05414	Cg04628;Cg05561;Cg11698;Cg12458;Cg13681;Cg13748;Cg18444;Cg18445;Cg19321;Cg19543;Cg24912;Cg29094;Cg29149;Cg29252;Cg29483;Cg29623;Cg29819;Cg30044;Cg30093;Cg30237;Cg30238;Cg30361	K08042+K06493+K06265+K06265+K05692+K08049+K04345+K04345+K05637+K04141+K05719+K08041+K06493+K08045+K06483+K06584+K06485+K06585+K06585+K05719+K05719+K06584
Metabolism	Carbohydrate metabolism	Galactose metabolism	21	ko00052	Cg05789;Cg09807;Cg13936;Cg16687;Cg17574;Cg17842;Cg18289;Cg18290;Cg20068;Cg24031;Cg24445;Cg24560;Cg24577;Cg26333;Cg27935;Cg28925;Cg28936;Cg28937;novel.1754;novel.2059;novel.6096	K01785+K07966+K15779+K01784+K12316+K00849+K01835+K01835+K00850+K01785+K00844+K00844+K00844+K00965+K01785+K01785+K01785+K01785+K01785+K01084+K00844
Metabolism	Metabolism of other amino acids	Selenocompound metabolism	21	ko00450	Cg07014;Cg07131;Cg10320;Cg12199;Cg13349;Cg19223;Cg19920;Cg20228;Cg21112;Cg21113;Cg21308;Cg22967;Cg24230;Cg24485;Cg24515;Cg24776;Cg28146;Cg28147;Cg28150;novel.4674;novel.5327	K22182+K01763+K22182+K01008+K00816+K01758+K13811+K00548+K00816+K00816+K00548+K01874+K03341+K10837+K10837+K01874+K00548+K00548+K00548+K01758+K01874
Metabolism	Glycan biosynthesis and metabolism	Mannose type O-glycan biosyntheis	21	ko00515	Cg05165;Cg09807;Cg12311;Cg16436;Cg16705;Cg16758;Cg16759;Cg16760;Cg16761;Cg20979;Cg21707;Cg23467;Cg23468;Cg23470;Cg23497;Cg24347;Cg26868;Cg27598;Cg28260;novel.4734;novel.5698	K18207+K07966+K21052+K00728+K19872+K09666+K09666+K09666+K09666+K21031+K09668+K17547+K17547+K17547+K09654+K17547+K00728+K21032+K19873+K09666+K17547
Metabolism	Metabolism of cofactors and vitamins	Porphyrin and chlorophyll metabolism	21	ko00860	Cg01256;Cg05572;Cg05654;Cg07089;Cg08837;Cg10680;Cg13539;Cg14921;Cg18988;Cg19611;Cg23453;Cg23919;Cg24448;Cg24554;Cg24594;Cg24809;Cg25117;Cg26975;Cg27252;Cg29661;Cg29803	K01772+K08099+K00798+K01195+K00228+K00643+K01698+K01749+K01599+K02257+K05901+K01885+K13624+K13624+K00231+K02259+K01719+K14163+K19054+K01749+K01749
Human Diseases	Endocrine and metabolic diseases	Type II diabetes mellitus	21	ko04930	Cg02711;Cg03498;Cg05663;Cg05778;Cg06935;Cg07130;Cg09756;Cg16689;Cg16690;Cg18484;Cg20128;Cg20129;Cg24445;Cg24560;Cg24577;Cg26525;novel.2029;novel.2109;novel.2947;novel.5774;novel.6096	K00873+K04371+K00922+K02649+K07203+K00922+K04526+K02649+K02649+K04440+K16172+K16172+K00844+K00844+K00844+K18050+K02649+K02649+K02649+K00873+K00844
Metabolism	Amino acid metabolism	Arginine biosynthesis	20	ko00220	Cg04261;Cg05007;Cg05372;Cg05373;Cg05521;Cg05522;Cg05523;Cg07035;Cg08445;Cg10321;Cg10324;Cg12201;Cg14629;Cg15577;Cg15578;Cg20758;Cg23628;Cg28759;novel.1810;novel.2572	K13240+K00814+K01915+K01915+K01915+K01915+K01915+K01755+K01915+K14677+K14677+K00814+K01940+K01915+K01915+K01425+K14454+K01476+K01915+K01915
Metabolism	Glycan biosynthesis and metabolism	Glycosphingolipid biosynthesis - ganglio series	20	ko00604	Cg00659;Cg00661;Cg00802;Cg00958;Cg01202;Cg02143;Cg02456;Cg02457;Cg02910;Cg03175;Cg04698;Cg04715;Cg05554;Cg06950;Cg11442;Cg13138;Cg21624;Cg21625;Cg26602;novel.818	K12373+K12373+K12373+K12373+K12373+K12373+K12373+K12373+K12373+K12373+K03372+K03372+K12373+K12373+K12373+K12373+K12373+K12373+K12373+K12373
Organismal Systems	Immune system	Antigen processing and presentation	20	ko04612	Cg00256;Cg00257;Cg00258;Cg00259;Cg09922;Cg10565;Cg14077;Cg14358;Cg17505;Cg17506;Cg17507;Cg17918;Cg18793;Cg20195;Cg20823;Cg21470;Cg26677;Cg27050;Cg27241;Cg30496	K01365+K01365+K01365+K01365+K01365+K08057+K08054+K01365+K03283+K03283+K03283+K03283+K08057+K03283+K01365+K01363+K04079+K01369+K08056+K08057
Metabolism	Metabolism of cofactors and vitamins	Retinol metabolism	19	ko00830	Cg04531;Cg05259;Cg05260;Cg06407;Cg07132;Cg09298;Cg09334;Cg15274;Cg20280;Cg20412;Cg21947;Cg26086;Cg26087;Cg27258;Cg28169;Cg28171;Cg29206;Cg29241;Cg29257	K11153+K09516+K09516+K11155+K11146+K00515+K00515+K11153+K15734+K15734+K15734+K07249+K07249+K07249+K11153+K11153+K11153+K13369+K11153
Genetic Information Processing	Replication and repair	Mismatch repair	19	ko03430	Cg03848;Cg04741;Cg05821;Cg06521;Cg13890;Cg13913;Cg17958;Cg19496;Cg19637;Cg21333;Cg22124;Cg22237;Cg23209;Cg23451;Cg26610;Cg27850;Cg28113;Cg28732;Cg29244	K10756+K03505+K10755+K10747+K10756+K10740+K04802+K10858+K10747+K08737+K10754+K02327+K10755+K03504+K08739+K08736+K02328+K10746+K08734
Organismal Systems	Nervous system	Long-term depression	19	ko04730	Cg03498;Cg04031;Cg04261;Cg11493;Cg13053;Cg13065;Cg13808;Cg13809;Cg15519;Cg18224;Cg19756;Cg22592;Cg22688;Cg23851;Cg23852;Cg25043;Cg25908;Cg26811;Cg27311	K04371+K12319+K13240+K04365+K03456+K03456+K12318+K12319+K16342+K02677+K04382+K07827+K07827+K16342+K16342+K12319+K04368+K05858+K05858
Human Diseases	Substance dependence	Cocaine addiction	19	ko05030	Cg07361;Cg11434;Cg12541;Cg13115;Cg13389;Cg14520;Cg16806;Cg17749;Cg18249;Cg18444;Cg18445;Cg18698;Cg19600;Cg19904;Cg21894;Cg23604;Cg24607;Cg27509;Cg29252	K00501+K04606+K04145+K04145+K04145+K01593+K05213+K05210+K00274+K04345+K04345+K04448+K02580+K04374+K01593+K04144+K00274+K00274+K08045
Human Diseases	Cardiovascular diseases	Viral myocarditis	19	ko05416	Cg04792;Cg04794;Cg04820;Cg11207;Cg11208;Cg11209;Cg11210;Cg11211;Cg11220;Cg11698;Cg12458;Cg13681;Cg18252;Cg19321;Cg22360;Cg24609;Cg26330;Cg26332;Cg28657	K03260+K03260+K03260+K06278+K06278+K06278+K06278+K06278+K06278+K06265+K06265+K05692+K04392+K05637+K03260+K04392+K02187+K02187+K04392
Metabolism	Metabolism of other amino acids	Taurine and hypotaurine metabolism	18	ko00430	Cg01018;Cg02988;Cg02991;Cg02993;Cg03021;Cg03097;Cg03099;Cg05999;Cg13286;Cg14035;Cg15157;Cg15216;Cg17027;Cg21620;Cg22753;Cg28480;Cg28530;Cg29733	K00456+K00456+K00456+K00456+K00456+K00456+K00456+K18592+K00681+K18592+K01580+K10712+K00681+K01594+K18592+K01594+K00659+K00659
Metabolism	Glycan biosynthesis and metabolism	Glycosaminoglycan biosynthesis - chondroitin sulfate / dermatan sulfate	18	ko00532	Cg06889;Cg09725;Cg09727;Cg11148;Cg12785;Cg12788;Cg15037;Cg17016;Cg17563;Cg18127;Cg18842;Cg19599;Cg20308;Cg20532;Cg23992;Cg24724;Cg26058;Cg28555	K00734+K01017+K01017+K08106+K01017+K01017+K08106+K00771+K08106+K08106+K01017+K00746+K08106+K08106+K00733+K08106+K10158+K13499
Metabolism	Lipid metabolism	Linoleic acid metabolism	18	ko00591	Cg04180;Cg04551;Cg05941;Cg06207;Cg06208;Cg09187;Cg09695;Cg14427;Cg14428;Cg14429;Cg14430;Cg15519;Cg19823;Cg23851;Cg23852;Cg25969;Cg30414;novel.1849	K01047+K01047+K01047+K01047+K01047+K16817+K01047+K16817+K16817+K16817+K16817+K16342+K01047+K16342+K16342+K14621+K14621+K01047
Organismal Systems	Digestive system	Protein digestion and absorption	18	ko04974	Cg03902;Cg03942;Cg06280;Cg14014;Cg14642;Cg15644;Cg16337;Cg16358;Cg16359;Cg16363;Cg17568;Cg19372;Cg21619;Cg21621;Cg24389;Cg28293;Cg28294;Cg28324	K06238+K06238+K06238+K06238+K06238+K06238+K06238+K06238+K06238+K06238+K06238+K08131+K19719+K06236+K06237+K06238+K06238+K06238
Organismal Systems	Digestive system	Vitamin digestion and absorption	18	ko04977	Cg04146;Cg04147;Cg04148;Cg04218;Cg05860;Cg06472;Cg09538;Cg09539;Cg09540;Cg09541;Cg16177;Cg20513;Cg24202;Cg24203;Cg25969;Cg30414;novel.1695;novel.4862	K05665+K05665+K05665+K05665+K05665+K13885+K14073+K14073+K14073+K14073+K05665+K05665+K14073+K14073+K14621+K14621+K05665+K05665
Human Diseases	Cancers	Thyroid cancer	18	ko05216	Cg03498;Cg05775;Cg09517;Cg11493;Cg16377;Cg16971;Cg16973;Cg18820;Cg19083;Cg19366;Cg19391;Cg19393;Cg19397;Cg20608;Cg22592;Cg22688;Cg25908;Cg26771	K04371+K10140+K14021+K04365+K02105+K04402+K04402+K09291+K04491+K04377+K04402+K04402+K04402+K02159+K07827+K07827+K04368+K03511
Human Diseases	Cardiovascular diseases	Hypertrophic cardiomyopathy (HCM)	18	ko05410	Cg05561;Cg11698;Cg12458;Cg13681;Cg19321;Cg19716;Cg19962;Cg24912;Cg26844;Cg29149;Cg29483;Cg29623;Cg29819;Cg30044;Cg30093;Cg30237;Cg30238;Cg30361	K06493+K06265+K06265+K05692+K05637+K07198+K07198+K05719+K07199+K06493+K06483+K06584+K06485+K06585+K06585+K05719+K05719+K06584
Metabolism	Lipid metabolism	Fatty acid biosynthesis	17	ko00061	Cg04848;Cg04849;Cg05858;Cg06734;Cg07040;Cg09310;Cg09311;Cg13892;Cg15532;Cg17684;Cg17973;Cg18495;Cg19181;Cg25028;Cg26827;Cg28268;novel.4576	K18660+K18660+K00665+K00645+K09458+K07512+K07512+K01071+K13370+K00665+K01897+K00665+K01897+K01897+K22540+K15013+K01897
Metabolism	Glycan biosynthesis and metabolism	Glycosaminoglycan biosynthesis - keratan sulfate	17	ko00533	Cg04878;Cg04879;Cg04880;Cg05886;Cg09099;Cg09807;Cg09930;Cg09932;Cg09938;Cg10644;Cg10649;Cg11499;Cg14136;Cg14138;Cg20470;Cg20573;Cg27280	K01022+K01022+K01022+K04746+K01022+K07966+K04746+K04746+K04746+K01022+K01022+K01022+K01022+K01022+K04746+K01022+K00717
Cellular Processes	Cell growth and death	Ferroptosis	17	ko04216	Cg05891;Cg09233;Cg09535;Cg12749;Cg12773;Cg16600;Cg17973;Cg19181;Cg21869;Cg22904;Cg24032;Cg24448;Cg24554;Cg25028;Cg30172;novel.4576;novel.6198	K13515+K21421+K08339+K08337+K08337+K11205+K01897+K01897+K21398+K11204+K00657+K13624+K13624+K01897+K21398+K01897+K00657
Human Diseases	Cardiovascular diseases	Arrhythmogenic right ventricular cardiomyopathy (ARVC)	17	ko05412	Cg05561;Cg11698;Cg12458;Cg13681;Cg16377;Cg19083;Cg19321;Cg24912;Cg29149;Cg29483;Cg29623;Cg29819;Cg30044;Cg30093;Cg30237;Cg30238;Cg30361	K06493+K06265+K06265+K05692+K02105+K04491+K05637+K05719+K06493+K06483+K06584+K06485+K06585+K06585+K05719+K05719+K06584
Metabolism	Carbohydrate metabolism	Pentose and glucuronate interconversions	16	ko00040	Cg07089;Cg09523;Cg09912;Cg09913;Cg10096;Cg16597;Cg19074;Cg19681;Cg19995;Cg20979;Cg22224;Cg24043;Cg25131;Cg25923;Cg26969;novel.2360	K01195+K13247+K13247+K13247+K00008+K00012+K01805+K03331+K03331+K21031+K01783+K00078+K00854+K00008+K00008+K13247
Metabolism	Amino acid metabolism	Phenylalanine metabolism	16	ko00360	Cg03954;Cg04300;Cg05421;Cg07773;Cg09162;Cg10211;Cg10212;Cg13230;Cg14520;Cg15721;Cg18249;Cg21894;Cg23628;Cg24607;Cg27509;novel.1802	K00815+K00457+K07253+K00500+K00500+K01426+K01426+K00276+K01593+K07253+K00274+K01593+K14454+K00274+K00274+K07253
Metabolism	Metabolism of cofactors and vitamins	Thiamine metabolism	16	ko00730	Cg04289;Cg04291;Cg04292;Cg04801;Cg04802;Cg05701;Cg06144;Cg06804;Cg06824;Cg14843;Cg15651;Cg16540;Cg20704;Cg22057;Cg25786;Cg28728	K01077+K01077+K01077+K01077+K01077+K00949+K05307+K01077+K01077+K01077+K00939+K00939+K14394+K00939+K06928+K00939
Metabolism	Global and overview maps	2-Oxocarboxylic acid metabolism	16	ko01210	Cg02900;Cg03164;Cg05007;Cg10321;Cg10324;Cg10516;Cg12201;Cg16542;Cg17215;Cg17352;Cg21730;Cg21905;Cg22279;Cg23628;Cg26337;Cg30689	K01681+K01681+K00814+K14677+K14677+K00030+K00814+K00030+K00825+K00825+K00031+K00031+K00826+K14454+K00030+K01647
Organismal Systems	Excretory system	Aldosterone-regulated sodium reabsorption	16	ko04960	Cg03498;Cg05663;Cg05778;Cg07130;Cg09756;Cg16689;Cg16690;Cg18224;Cg19588;Cg20128;Cg20129;Cg22592;Cg22688;novel.2029;novel.2109;novel.2947	K04371+K00922+K02649+K00922+K04526+K02649+K02649+K02677+K06276+K16172+K16172+K07827+K07827+K02649+K02649+K02649
Organismal Systems	Excretory system	Collecting duct acid secretion	16	ko04966	Cg05321;Cg07998;Cg13884;Cg15609;Cg16466;Cg19706;Cg19972;Cg20437;Cg20734;Cg22481;Cg24433;Cg24434;Cg24495;Cg25595;Cg26206;Cg28265	K02146+K02150+K02155+K02152+K02145+K02154+K02154+K02154+K02151+K02148+K02147+K02147+K02147+K02153+K18245+K02149
Environmental Information Processing	Signal transduction	Hedgehog signaling pathway	15	ko04340	Cg04454;Cg06788;Cg06842;Cg09611;Cg17629;Cg18444;Cg18445;Cg20272;Cg23508;Cg23509;Cg23521;Cg23522;Cg23795;Cg23993;Cg25406	K08957+K00910+K00910+K10151+K04678+K04345+K04345+K03347+K04439+K04439+K04439+K04439+K03869+K03362+K08957
Metabolism	Glycan biosynthesis and metabolism	Glycosaminoglycan biosynthesis - heparan sulfate / heparin	14	ko00534	Cg04912;Cg04913;Cg06889;Cg08924;Cg14961;Cg17016;Cg17974;Cg19015;Cg19137;Cg19138;Cg21635;Cg23082;Cg23992;Cg26058	K01793+K01793+K00734+K02367+K02513+K00771+K02577+K07809+K08104+K08104+K02370+K08103+K00733+K10158
Human Diseases	Cancers	Bladder cancer	14	ko05219	Cg03498;Cg08923;Cg09981;Cg09982;Cg11493;Cg15826;Cg19085;Cg19366;Cg22592;Cg22688;Cg25908;novel.241;novel.871;novel.4028	K04371+K06643+K00758+K00758+K04365+K04361+K05704+K04377+K07827+K07827+K04368+K06643+K06643+K04361
Human Diseases	Immune diseases	Inflammatiory bowel disease (IBD)	14	ko05321	Cg01320;Cg08933;Cg08935;Cg08940;Cg08944;Cg18698;Cg19600;novel.2172;novel.2257;novel.2259;novel.2708;novel.2709;novel.2710;novel.2712	K23605+K10159+K10160+K10159+K10159+K04448+K02580+K10160+K10160+K10159+K10159+K10159+K10159+K10159
Environmental Information Processing	Signaling molecules and interaction	Cytokine-cytokine receptor interaction	13	ko04060	Cg13202;Cg13270;Cg17915;Cg18223;Cg18743;Cg20435;Cg22090;Cg24552;Cg24942;Cg25025;Cg27918;Cg29596;novel.5824	K04675+K04674+K21283+K13578+K04666+K16621+K04671+K04721+K04389+K04721+K21283+K22687+K04721
Organismal Systems	Excretory system	Vasopressin-regulated water reabsorption	13	ko04962	Cg00286;Cg00317;Cg01503;Cg02037;Cg06109;Cg13213;Cg13407;Cg13748;Cg18444;Cg18445;Cg20104;Cg20252;Cg23354	K07905+K07905+K07904+K07904+K10416+K07888+K07889+K08049+K04345+K04345+K10415+K07904+K05242
Human Diseases	Neurodegenerative diseases	Prion diseases	13	ko05020	Cg03498;Cg08305;Cg13147;Cg13508;Cg14529;Cg14784;Cg18444;Cg18445;Cg20608;Cg20798;Cg24627;Cg25908;novel.6994	K04371+K04565+K09490+K02599+K09490+K05635+K04345+K04345+K02159+K09490+K09203+K04368+K04565
Human Diseases	Substance dependence	Nicotine addiction	13	ko05033	Cg04423;Cg05935;Cg06586;Cg06587;Cg13268;Cg13509;Cg13511;Cg14244;Cg14946;Cg16806;Cg17749;Cg23880;Cg24644	K04809+K04808+K04808+K04808+K05185+K05175+K05181+K05175+K05186+K05213+K05210+K04808+K04808
Human Diseases	Infectious diseases	Malaria	13	ko05144	Cg08933;Cg08935;Cg08940;Cg08944;Cg23358;Cg26349;novel.2172;novel.2257;novel.2259;novel.2708;novel.2709;novel.2710;novel.2712	K10159+K10160+K10159+K10159+K04659+K04659+K10160+K10160+K10159+K10159+K10159+K10159+K10159
Metabolism	Lipid metabolism	Steroid biosynthesis	12	ko00100	Cg05569;Cg06352;Cg08982;Cg15117;Cg16203;Cg18403;Cg18985;Cg20722;Cg20723;Cg28804;Cg30043;novel.3345	K01052+K13373+K01052+K19532+K00227+K00213+K09828+K00227+K00227+K19532+K00637+K01824
Metabolism	Metabolism of cofactors and vitamins	Ubiquinone and other terpenoid-quinone biosynthesis	12	ko00130	Cg03954;Cg04300;Cg04545;Cg04752;Cg09019;Cg11572;Cg18651;Cg19444;Cg26374;Cg26500;Cg26710;Cg28382	K00815+K00457+K06127+K05357+K00591+K06125+K06134+K10106+K01904+K01904+K06126+K01904
Metabolism	Energy metabolism	Sulfur metabolism	12	ko00920	Cg02490;Cg03659;Cg03850;Cg13634;Cg13774;Cg17993;Cg18946;Cg19920;Cg24424;Cg24503;Cg28140;Cg28425	K22470+K00380+K01011+K00387+K17725+K01011+K15759+K13811+K17285+K17285+K01738+K01011
Genetic Information Processing	Replication and repair	Non-homologous end-joining	12	ko03450	Cg04028;Cg06546;Cg12894;Cg16283;Cg17535;Cg18381;Cg20770;Cg20771;Cg21024;Cg22848;Cg23637;Cg25162	K10980+K04799+K10887+K10866+K10777+K06642+K10886+K10886+K10884+K10885+K03513+K03512
Organismal Systems	Circulatory system	Cardiac muscle contraction	12	ko04260	Cg03887;Cg03928;Cg03968;Cg03969;Cg06131;Cg06523;Cg16958;Cg18531;Cg18602;Cg27428;novel.4618;novel.4687	K02266+K02266+K00411+K00411+K02263+K00413+K00415+K02265+K00416+K02264+K02265+K02267
Organismal Systems	Sensory system	Taste transduction	12	ko04742	Cg07093;Cg13118;Cg13509;Cg14244;Cg18444;Cg18445;Cg20694;Cg21900;Cg24404;Cg26608;Cg29306;Cg30032	K04153+K13755+K05175+K05175+K04345+K04345+K04131+K04615+K04153+K04131+K04153+K04153
Metabolism	Metabolism of cofactors and vitamins	Vitamin B6 metabolism	11	ko00750	Cg00288;Cg00319;Cg06413;Cg06827;Cg09203;Cg09204;Cg09205;Cg11085;Cg20241;Cg20242;Cg30618	K00831+K00831+K13248+K13248+K00868+K00868+K00868+K00275+K06215+K08681+K13248
Environmental Information Processing	Signal transduction	Hedgehog signaling pathway - fly	11	ko04341	Cg04454;Cg15715;Cg17629;Cg18444;Cg18445;Cg20272;Cg20319;Cg23795;Cg23993;Cg24355;Cg25406	K08957+K03868+K04678+K04345+K04345+K03347+K03094+K03869+K03362+K08291+K08957
Environmental Information Processing	Signal transduction	Hippo signaling pathway -fly	11	ko04391	Cg04681;Cg05731;Cg13053;Cg13065;Cg13681;Cg16190;Cg18484;Cg19366;Cg19756;Cg23987;Cg30069	K06069+K06093+K03456+K03456+K05692+K03209+K04440+K04377+K04382+K04354+K04237
Organismal Systems	Endocrine system	Cortisol synthesis and secretion	11	ko04927	Cg04628;Cg06472;Cg13748;Cg18444;Cg18445;Cg19904;Cg26811;Cg27311;Cg28242;Cg29094;Cg29252	K08042+K13885+K08049+K04345+K04345+K04374+K05858+K05858+K18437+K08041+K08045
Metabolism	Carbohydrate metabolism	Ascorbate and aldarate metabolism	10	ko00053	Cg09125;Cg13429;Cg16597;Cg18593;Cg18601;Cg27025;Cg27791;Cg28024;Cg29989;Cg30445	K00128+K00469+K00012+K01053+K01053+K14085+K00128+K00128+K00149+K17744
Metabolism	Metabolism of cofactors and vitamins	Riboflavin metabolism	10	ko00740	Cg02813;Cg16881;Cg20704;Cg21911;Cg23453;Cg29304;novel.2911;novel.2994;novel.3437;novel.7400	K00861+K14379+K14394+K00953+K05901+K14410+K00953+K00953+K00953+K00953
Metabolism	Metabolism of cofactors and vitamins	Pantothenate and CoA biosynthesis	10	ko00770	Cg04819;Cg04841;Cg05990;Cg18175;Cg20283;Cg20689;Cg22279;Cg23324;Cg30499;novel.4590	K08069+K01598+K01431+K00207+K01922+K01464+K00826+K09680+K02318+K00207
Environmental Information Processing	Signaling molecules and interaction	Cell adhesion molecules (CAMs)	10	ko04514	Cg02812;Cg24912;Cg29483;Cg29623;Cg29819;Cg30044;Cg30093;Cg30237;Cg30238;Cg30361	K06766+K05719+K06483+K06584+K06485+K06585+K06585+K05719+K05719+K06584
Organismal Systems	Development	Dorso-ventral axis formation	9	ko04320	Cg03498;Cg11493;Cg13508;Cg15826;Cg17616;Cg22592;Cg22688;Cg25908;novel.4028	K04371+K04365+K02599+K04361+K04364+K07827+K07827+K04368+K04361
Metabolism	Lipid metabolism	Primary bile acid biosynthesis	8	ko00120	Cg04816;Cg10984;Cg16850;Cg18147;Cg26382;Cg26493;Cg28530;Cg29733	K11992+K00489+K08764+K08764+K01796+K01796+K00659+K00659
Metabolism	Lipid metabolism	Steroid hormone biosynthesis	8	ko00140	Cg02817;Cg06352;Cg10984;Cg15532;Cg16468;Cg21495;Cg21634;Cg29241	K15680+K13373+K00489+K13370+K12345+K10251+K10251+K13369
Metabolism	Metabolism of other amino acids	Phosphonate and phosphinate metabolism	8	ko00440	Cg04311;Cg16788;Cg18650;Cg22263;Cg22280;novel.5781;novel.5782;novel.6105	K01841+K00993+K00967+K09459+K13644+K00968+K00968+K00968
Genetic Information Processing	Folding, sorting and degradation	Sulfur relay system	8	ko04122	Cg03850;Cg06630;Cg07914;Cg15194;Cg17993;Cg27494;Cg28226;Cg28425	K01011+K14169+K14168+K12161+K01011+K11996+K03635+K01011
Organismal Systems	Environmental adaptation	Circadian rhythm	7	ko04710	Cg15715;Cg19716;Cg19962;Cg20272;Cg20319;Cg23993;Cg26844	K03868+K07198+K07198+K03347+K03094+K03362+K07199
Human Diseases	Infectious diseases	African trypanosomiasis	7	ko05143	Cg18224;Cg19852;Cg24942;Cg26088;Cg26098;Cg26811;Cg27311	K02677+K00463+K04389+K04234+K04234+K05858+K05858
Metabolism	Biosynthesis of other secondary metabolites	Caffeine metabolism	6	ko00232	Cg11921;Cg11922;Cg15524;Cg21983;Cg26876;Cg27890	K00106+K00106+K00365+K00106+K00106+K00365
Organismal Systems	Immune system	Hematopoietic cell lineage	6	ko04640	Cg00238;Cg05561;Cg09618;Cg29149;Cg29483;Cg29819	K11140+K06493+K11140+K06493+K06483+K06485
Human Diseases	Endocrine and metabolic diseases	Maturity onset diabetes of the young	6	ko04950	Cg04606;Cg04607;Cg06797;Cg06830;Cg06863;Cg09756	K06054+K06054+K06054+K06054+K06054+K04526
Human Diseases	Immune diseases	Primary immunodeficiency	6	ko05340	Cg12894;Cg20178;Cg20179;Cg23672;Cg29205;Cg29258	K10887+K01488+K01488+K03648+K03648+K03648
Human Diseases	Endocrine and metabolic diseases	Type I diabetes mellitus	5	ko04940	Cg09756;Cg15157;Cg24942;Cg29541;Cg29552	K04526+K01580+K04389+K04077+K04077
Organismal Systems	Excretory system	Proximal tubule bicarbonate reclamation	5	ko04964	Cg03744;Cg03745;Cg20758;Cg26206;Cg28791	K01596+K01596+K01425+K18245+K00025
Metabolism	Amino acid metabolism	Valine, leucine and isoleucine biosynthesis	4	ko00290	Cg06763;Cg06764;Cg18433;Cg22279	K17989+K17989+K01754+K00826
Metabolism	Amino acid metabolism	Phenylalanine, tyrosine and tryptophan biosynthesis	4	ko00400	Cg03954;Cg07773;Cg09162;Cg23628	K00815+K00500+K00500+K14454
Metabolism	Biosynthesis of other secondary metabolites	Neomycin, kanamycin and gentamicin biosynthesis	4	ko00524	Cg24445;Cg24560;Cg24577;novel.6096	K00844+K00844+K00844+K00844
Human Diseases	Immune diseases	Systemic lupus erythematosus	4	ko05322	Cg04965;Cg05408;Cg06323;Cg17749	K11086+K11088+K11087+K05210
Metabolism	Amino acid metabolism	Lysine biosynthesis	3	ko00300	Cg17215;Cg17352;Cg28622	K00825+K00825+K01586
Metabolism	Metabolism of cofactors and vitamins	Lipoic acid metabolism	3	ko00785	Cg14099;Cg22193;Cg23696	K03644+K10105+K23735
Metabolism	Metabolism of terpenoids and polyketides	Insect hormone biosynthesis	3	ko00981	Cg09125;Cg27791;Cg28024	K00128+K00128+K00128
Environmental Information Processing	Signaling molecules and interaction	Viral protein interaction with cytokine and cytokine receptor	3	ko04061	Cg24552;Cg25025;novel.5824	K04721+K04721+K04721
Metabolism	Biosynthesis of other secondary metabolites	Penicillin and cephalosporin biosynthesis	2	ko00311	Cg12674;Cg16721	K00273+K00273
Metabolism	Metabolism of other amino acids	D-Arginine and D-ornithine metabolism	2	ko00472	Cg12674;Cg16721	K00273+K00273
Metabolism	Carbohydrate metabolism	C5-Branched dibasic acid metabolism	2	ko00660	Cg17159;Cg17293	K17724+K17724
Metabolism	Metabolism of cofactors and vitamins	Biotin metabolism	2	ko00780	Cg07040;Cg24136	K09458+K01942
Organismal Systems	Immune system	Complement and coagulation cascades	2	ko04610	Cg06489;Cg12326	K03915+K01313
Organismal Systems	Endocrine system	Renin-angiotensin system	2	ko04614	Cg00238;Cg09618	K11140+K11140
Organismal Systems	Digestive system	Mineral absorption	2	ko04978	Cg21869;Cg30172	K21398+K21398
Human Diseases	Immune diseases	Autoimmune thyroid disease	2	ko05320	Cg24942;Cg27360	K04389+K04249
Metabolism	Biosynthesis of other secondary metabolites	Monobactam biosynthesis	1	ko00261	Cg19920	K13811
Metabolism	Metabolism of other amino acids	D-Glutamine and D-glutamate metabolism	1	ko00471	Cg20758	K01425
Organismal Systems	Immune system	Intestinal immune network for IgA production	1	ko04672	Cg29483	K06483
Human Diseases	Immune diseases	Allograft rejection	1	ko05330	Cg24942	K04389
Human Diseases	Immune diseases	Graft-versus-host disease	1	ko05332	Cg24942	K04389
