# Supplementary material for: Transcriptome profiling combined with network analysis deepens the understanding of immune response mechanisms in blood of pacific oyster Crassostrea gigas infected by Vibrio alginolyticus
Source: Frontiers journal article supplement (doi:10.3389/fmars.2022.1017445), 2022-09-16
Supplement: Data_Sheet_6.XLSX [file Data_Sheet_6.XLSX]

## Sheet: Sheet1
#node	identifier	node_degree
Cdc42	10090.ENSMUSP00000054634	41
Cav1	10090.ENSMUSP00000007799	31
Pik3r1	10090.ENSMUSP00000056774	31
Xiap	10090.ENSMUSP00000110746	30
Itga4	10090.ENSMUSP00000099718	28
Myd88	10090.ENSMUSP00000035092	27
Rala	10090.ENSMUSP00000009003	27
Thbs1	10090.ENSMUSP00000044903	27
Tek	10090.ENSMUSP00000099862	26
Hgf	10090.ENSMUSP00000030683	25
Itga9	10090.ENSMUSP00000044227	24
Plcg1	10090.ENSMUSP00000099404	24
Ptger4	10090.ENSMUSP00000048736	24
Birc2	10090.ENSMUSP00000140049	23
Birc3	10090.ENSMUSP00000013949	23
Flna	10090.ENSMUSP00000033699	23
Pik3cd	10090.ENSMUSP00000101315	23
Tbk1	10090.ENSMUSP00000020316	23
Itpr1	10090.ENSMUSP00000032192	21
Hspa1a	10090.ENSMUSP00000084586	19
Rapgef1	10090.ENSMUSP00000092703	19
Reln	10090.ENSMUSP00000124052	19
Ppp1cc	10090.ENSMUSP00000099587	18
Prom1	10090.ENSMUSP00000073751	17
Rptor	10090.ENSMUSP00000026671	17
Map2k6	10090.ENSMUSP00000020949	16
Myl9	10090.ENSMUSP00000085913	16
Tln1	10090.ENSMUSP00000030187	16
Ctsk	10090.ENSMUSP00000015664	15
Pla2g4a	10090.ENSMUSP00000070868	15
Gadd45a	10090.ENSMUSP00000044034	14
Cav2	10090.ENSMUSP00000000058	13
Eif2ak3	10090.ENSMUSP00000034093	13
Rassf5	10090.ENSMUSP00000027688	13
Adcy2	10090.ENSMUSP00000022013	12
Ctsl	10090.ENSMUSP00000021933	12
Pik3ap1	10090.ENSMUSP00000052777	12
Tln2	10090.ENSMUSP00000039633	12
Alox5	10090.ENSMUSP00000026795	11
Grk1	10090.ENSMUSP00000033827	11
Rapgef4	10090.ENSMUSP00000099759	11
Gadd45b	10090.ENSMUSP00000015456	10
Myb	10090.ENSMUSP00000020158	10
Cyba	10090.ENSMUSP00000017604	9
Rap1gap	10090.ENSMUSP00000101461	9
Rapgef6	10090.ENSMUSP00000099804	9
Etv6	10090.ENSMUSP00000079818	8
Angpt4	10090.ENSMUSP00000028955	7
Col6a5	10090.ENSMUSP00000139398	7
Col6a6	10090.ENSMUSP00000096040	7
Col9a1	10090.ENSMUSP00000051579	7
Hpgd	10090.ENSMUSP00000034026	7
Pfn4	10090.ENSMUSP00000020967	7
Col6a4	10090.ENSMUSP00000112472	5
Etv1	10090.ENSMUSP00000093442	5
Cks1b	10090.ENSMUSP00000029679	4
Creb3l3	10090.ENSMUSP00000112836	4
Asic4	10090.ENSMUSP00000045598	3
Cyp2j6	10090.ENSMUSP00000030303	3
Trpm2	10090.ENSMUSP00000101040	3
Dot1l	10090.ENSMUSP00000100973	2
Cep120	10090.ENSMUSP00000062433	0
Tceb1	10090.ENSMUSP00000140422	0
