# Supplementary material for: Transcriptome profiling combined with network analysis deepens the understanding of immune response mechanisms in blood of pacific oyster Crassostrea gigas infected by Vibrio alginolyticus
Source: Frontiers journal article supplement (doi:10.3389/fmars.2022.1017445), 2022-09-16
Supplement: Data_Sheet_7.XLSX [file Data_Sheet_7.XLSX]

## Sheet: sequence
Gene name (abbreviation)	Gene name (official full name)	Sequences
CDC42	cell division cycle 42	GTTTAGGAGTTATCTAAATTGTAGCATGAAGTTCTTTGTTTTGTTAATTCTTACAGTGTGCGCAGTAGAGAGTGCTCCCCAGTCCCGGGGTAGTTGCCTCAGCCTCTGCGGTCCGTACGGGGTGGACTGCCCTAGCGGCTACGAGTGTCGAGGCAATGGTTGTGGGCACGAGTGCTACAGGCCCGCCAACTACGTCGTCCCCGAAGGCTGTACTCCAGTGCGCTGCCGTATGCATTGTCCTCTTGGTTACAAAGTGGACGAGTCAGGATGTGACATATGTGAGTGTGACTACTCCGCCCTGTCACCCAGTGGACCAAATTAGTGTTTTGTTTCATGATGGTCTCCAGGGAAGTTTGTCCATCTGACTGAATGAGCTTGGCATTCAAATCAAATACAGAT…
CAV1	caveolin 1	TTTTCTTATAAATTGCAACGACATGTTTAATGGCGTTGAAGATGAGGTTCGGAACGAGAATACTAAGTACAATGCCAAGATATCATTATCACAGTGTTTTGTGAATCGGAATTTTTTTTTTTCAATTCTGAGACAGTTATTTCTAAGGTGAATACACGTAAATTCTTTTTTTTTTAAAAATAATAATTTAATAATAAACAAGGGAAAAAAAAGTTTTATTCATAATTAATCACAATTTTAATAATTTGAAAAATACTAATAATGTTTGTGATTCTAACGCCCAACCTAAATGACAGGATACGTACCGTTGTCACCGTGCATTCTTTTTTTCTGCTTTTTTTTTTAAAAGATGCCACGATATAATGTATCAATGAATTGTCTTTGTTTAAACATTTCCCA…
PIK3R1	phosphoinositide-3-kinase regulatory subunit 1	AAATGACGTCATACAACTTCCCTTTGCTATGGCGGATTGCATGTCAACTGATTTGCCTTGGTTGAGTTTAGTCGTGCTTTGACCGAAGTTTTTAGCAGAGCAGGTCCCAGTATGGAGGGAATAGAATACTACCGAGCCCTCTACAAATATATCCCAAAGGAAACCGACGACACAGAGGATGCGGACCAAATTCCAGACATTCCCTTGGACAAGGATGACATTCTAGAGGTCAAGCATCCGATCTCGGATGACATCCAAAAACCCACGGGCTGGCTGATCGGCTACAACAAGAACCAGAAACTGTGTGGCTACTTCCCCGGGCCCTATGTGGAGCACATCACCCCTCAGATGGTTCAGATGGCCCCACAGATCGATTTGCCCAAGATTCCTCATCGTTTG…
XIAP	X-linked inhibitor of apoptosis	ATTTTTAGAGTGTTGTAAGCCATTACATTTAGAAACAGCCTAATACGACCTATAGTATTGGTATTCAAAATTTGGTTCAGAATAATCTTTTGCATTCACGGAACGAAAACTAGTGATGTTGCCAAATAAAAAGGATAATCATGGGTTTTTCGGGCTCCCTTCCCAGAAATACCGAGATTGGTCCGAGAAGACAGCAGTTCAAGTAACAGAAGATGACCCCTGTCGTTCTAAATCAGAGTATTTCTCAATCAGCCCCTCTACGCTACATCATTCAAGGTGGAATTGTTTCGATGATGTAGAAACGGACGCCATTCCAAAATCACCATCAAAATCTCTACTAATTTCGGATTCGCCTTCTTCTCCTTATGAGGAGGATTTAGAGCATGATGGCGAAGTCTC…
MYD88	myeloid differentiation primary response gene 88	ATCATTGACTTTTGTGTAGACATATTCATTTACTGTGAAAGGCTTTGTTGAATTTAAACCCTTCCAAGAAGAAACCATCTTGATATTTTCTTGAAGTTTGGGTAGAAGTGTCGATACCACACAGAGCGAGATGACTCTGATGGACTACGATGCCTTTGTGATTTACAATCCCGTGGGAGATGACCTGCACTTTGTGAAGCTGCTGGTCAGTGTGATGGAAGCCCCACCCTACAGCCTGAGACTGTTTGTCCCCTGGCGGGACCATGCCCGAGAGGACCACTATGTGTCTGCTGACCTCATTCAGAACAAATGCCGGAAGTGCATAGTAGTATTGTCCAATAACTTTGCTAACAGCGAGATGGCGGAATTCCAGCTTAAGTATGCCACCTCACTCTCCCC…
TEK	TEK receptor tyrosine kinase	ATGTACGGATCACAAGACCGACACTTTATCCACTTAGCTATGGACTACGCATACAGATGTTCATCTGTAAATCAGACCAACCCGTACATACTTATAAGAGCTACGCGTACAGCAAACTCAAACGACATCTTGTGCAACAAGTGCAGACATCGCTACCATGGACACCAGAAAACTTGCCACCAGACGTCCAGTTCTCTTCCTGTGTCTCGGCCTCCACAACCAGGAGTGTGCAGTCCACCATCCATATCTTTGCCTCTCCAGAGAACACCTTCTTCACATGCCTACTGCTTAATCTGCAAGCGACCGGGTCCTAAACTTGTTGTCGTGTCTTCAGCAGCTAGATTTTCAGCATTTCTTCACCATGAAATTATCATCCCACCTGGAAGCAGATGTTGTCCA…
BIRC2	baculoviral IAP repeat containing 2	AAACTGGGAATGTAAGGATTTTAGAAATGAGGAATATAAGTAAATCATAATCAGAGCTCAACATGGTCAAAATCATTCATATTTTCTTTTGCGCGGTTGTGAATTTAATTTCATCTGACATAAAAATGCAGAGCAGAGAATTGCTATATATGGATATAAAGAACAAACCCGGTTTGGAGAGAAGCCTTAGCTGGCCTCAAGCAGAAAAAGAAAAACTGAGGGCATTTCATCTGTTGTACGAAAATCATGGATCGGAATCCTCAAAAATGCACATCATGCCAGGGGAAATCAAAATGGTGGAATATCTGCAAAACATGGACAAACGACTTGCACAGATATTAACTGAAGTGAAGGAGGTTAGAAAAAATTGTTCACAAAGTTATAAAACATCTCGTACAG…
BIRC3	baculoviral IAP repeat containing 3	ATGAATACAGTGAACAAATCTGGTTTGAAAAGAAGCCTCAGCTGGCCTGAAGCTGAAAAAGAAAAACTGAGGGCATTTCGTCTGTTGTTTGAAAATCATGGATCCAATATCTCAAAGATGGGAATCGTGCCAGAAAAAATCAACCTGATCATGATGATGGAATATCTGCAAAACATAGTCAAACGACTTGCACAGATATCATATGAAGTGAAGGAGGTTCGAAAAATTTGTTCACAAAGTAAAAGTTATAAAACATCTCGTACAGGACGAAAACATATCACATTGAAAAGAGGAAAGAAAAATGTAAGCAGAAGGACTAGTGCAAATCGAGTATCATGTCACCATTGTAAACCTCGAAGAACCCAGGCTATGGAGAAAGAACTCATCAAATTTTCACAA…
PIK3CD	phosphatidylinositol-4,5-bisphosphate 3-kinase catalytic subunit delta	GAGATCCATATCAAAGTGGCAGAAAAACATTGAGGAAGTAGACGACTATGAGGAAATAAGTATCTACTGAGTGGAGGGGACTGGAAGTCACCCCAGCCTTGAAGTCAAAATGCCTCCGATAGTGGTCCTACCCGAACTAGACGTGGCTAAAGAAGTCAGCGAGACTGACGGCCATGTAGAGATGGATTTCCTGATGCCTAATGGGATCTTCATACCGTACAGAGTGGACTTCTACGACTCGGTAGAAAACCTGAAACTGAAACTATGGAAGGAGGCAGAAAACTATCCACTGTTTAAGACTCTAAAGAGAAAGGAGAACTACTGTTTTGTCTACATCAACCAACAGGGACAGAAGGATGAGATCATGGATGAAGACATGTTACTGAACGAGTTTAAGAT…
PIK3AP1	phosphoinositide-3-kinase adaptor protein 1	ATCAAAGAAGAGCAACTGTGTTTTCTTCTTTTAGACAGTGTCTTCGCTTTAAGTCACGTGATTTAAATGTCAAGTCTAAATATGTGTTACTTCCTTGTTGATATATAAATAAAAAAAGGAAATAGGAAAGACGTCCCCAATCCTTCCAAAATCGATGTCGGGGCTAAAGAGGCAGTCATTTTTGTACAGGAGAGTCGGACCATAGAAATGTAAGGAATATAACGCTTTCCAAGATTTGAAACGAGGTTTCCACGATGCCCCATGTTTGTCTTCTGTACTCGCCGGATGACGGTCAGAGCTGGGAGAAATATTTCACCAAATTACTGGACAAGTCCATTCTGACCCATGTGTCCCTTAGTGTCAAGGTCGACTCCGTGGAGACGGAGAGGACCTTTAGTG…
COL6A5	collagen type VI alpha 5 chain	TCCAGCTTCCGATAGATAATGTTGCTCCATTCATAAAATATGTTTACTACGCCTAAACAAAAATTTCGAGAAGTTTTGAAACTTACGTAATTCATTGAGATATGTTTAATCATACTTATCTTTTCTTCAAATGTGTTTTTATGTTAGCGTCGAATGCTCCCTTTTTGGTAAGAGACCCTTTGCAGTGCTTCCTTCCGCCATGTAAATTGTTGGGGAGGCAGGAAATTCCTTCTTGTTTGTGGGTGACAAAAAGTGACTAAACCTTCAGTATATATAAAACACAAGATACATCTCAGAATTCAGAACACTCGCAGACGACAGTTCAATAAGAAACAAACAGCCAGAAAGAAAACTTACAGTCTGAAAGGAAACTAACAGTTCGAAAGGAAACATACATCG…
COL9A1	collagen type IX alpha 1 chain	AAGGAAGTACTATCACACTAAAGACTATATAGATATTGCTGATCTTAAAGAAATGGTTTGAGTCTCCCTGAGTCTGTCTGGAGTGTATATAGCAGGCGTTCTGGAATAAGCGCAGGAGTGTGCAAGCGACTGTGTCGTCTGCGAATTGGAAAGACTTTGATGAGGGATTCCAACAAGAGGTGAAGAACTCCGGATAAACCATTCACGGCAACGATGCTGCCAAGATTACGATCCGCACACCCTGGGTTGCTTATATCAGCTATATTTATTCTATACATTCCAATTTCTTACTGCTCAAAATGTGATTACACGGTATACGGAAAGGATGACGCACCAGAGTATGATTTCATATCCTCCTTCAACAATTTTAAACGAGTGATCGGGGTGAGGATTGACAGG…

## Sheet: data
gene_name	0h	12h	48h	method
CDC42	1	2.42296	1.06397	RNA-Seq
CAV1	1	0.0219019	1	RNA-Seq
PIK3R1	1	2.00385	1.18136	RNA-Seq
XIAP	1	2.57637	0.577495	RNA-Seq
MYD88	1	6.24109	0.616062	RNA-Seq
TEK	1	2.33598	1.41376	RNA-Seq
BIRC2	1	4.7126	0.353711	RNA-Seq
BIRC3	1	5.30723	0.47741	RNA-Seq
PIK3CD	1	3.1259	0.750071	RNA-Seq
PIK3AP1	1	2.36769	0.858165	RNA-Seq
COL6A5	1	2.86425	0.538225	RNA-Seq
COL9A1	1	0.160639	0.65109	RNA-Seq
CDC42	1	2.22955	1.12283	qRT-PCR
CAV1	1	0.125001	1.24109	qRT-PCR
PIK3R1	1	2.15117	1.62703	qRT-PCR
XIAP	1	1.05672	0.34855	qRT-PCR
MYD88	1	1.44676	0.109555	qRT-PCR
TEK	1	3.01615	1.08115	qRT-PCR
BIRC2	1	4.18473	0.0986599	qRT-PCR
BIRC3	1	3.85622	0.0818855	qRT-PCR
PIK3CD	1	6.89253	0.214651	qRT-PCR
PIK3AP1	1	1.16073	0.242293	qRT-PCR
COL6A5	1	2.07854	0.0995106	qRT-PCR
COL9A1	1	0.213585	0.455032	qRT-PCR
