# Supplementary material for: Transcriptome profiling combined with network analysis deepens the understanding of immune response mechanisms in blood of pacific oyster Crassostrea gigas infected by Vibrio alginolyticus
Source: Frontiers journal article supplement (doi:10.3389/fmars.2022.1017445), 2022-09-16
Supplement: Data_Sheet_8.DOCX [file Data_Sheet_8.DOCX]

We have uploaded and published our Raw data in the Sequence Read Archive database on NCBI.

The SRA accession numbers were SRR20648582 SRR20648583 SRR20648584 SRR20648585 SRR20648586 SRR20648587 SRR20648588 SRR20648589 SRR20648590 SRR20648591 SRR20648592 SRR20648593 SRR20648599 SRR20648610 SRR20648611

Meanwhile, we provide the specific website for querying these data:

<https://www.ncbi.nlm.nih.gov/Traces/study/?acc=PRJNA861156&o=acc_s%3Aa>
